# Supplementary material for: Synthesis of jadarite in the Li2O–Na2O–B2O3–SiO2–NaCl–H2O system: FTIR, Raman, and Li and B K-edge XANES characterizations and theoretical calculations
Source: Copernicus journal article supplement (doi:10.5194/ejm-36-139-2024), 2024-01-29
Supplement: Supplementary file 1 [file ejm-36-139-2024-supplement.pdf]

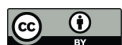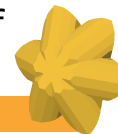

*Supplement of*

**Synthesis of jadarite in the  $\text{Li}_2\text{O}$ – $\text{Na}_2\text{O}$ – $\text{B}_2\text{O}_3$ – $\text{SiO}_2$ – $\text{NaCl}$ – $\text{H}_2\text{O}$  system:  
FTIR, Raman, and Li and B *K*-edge XANES characterizations  
and theoretical calculations**

**Xiu-Zhen Xie et al.**

*Correspondence to:* Yuanming Pan ([yuanming.pan@usask.ca](mailto:yuanming.pan@usask.ca))

The copyright of individual parts of the supplement might differ from the article licence.

## Validation of Li pseudopotentials

Figure S3 compares the calculated LiCl, Li<sub>2</sub>CO<sub>3</sub>, and Li<sub>2</sub>SiO<sub>3</sub> Li K-edge XANES with experiments. Figure S3a compares the calculated Li-edge XANES spectrum of LiCl with its measured spectra reported by Tsuji et al. (2002), using the total electron yield (TEY) method, and O'Shaughnessy et al. (2018), using the TEY and FYL methods. They all show a strong feature at 6 eV (Position a). The calculated spectrum has an extra shoulder at 6.5 eV (Position b), which is not observed in both measured spectra, probably because the intensity is too weak to be observed. The measured spectra have two small bumps at 7.2 eV (Position c) and 8.2 eV (Position d) in the spectrum of Tsuji et al. (2002) and 9 eV in O'Shaughnessy et al. (2018), which occur in the calculated spectrum at similar positions (i.e. 7.2 eV for Position c and 9.5 eV for Position d). At ~13 eV, all three spectra show a small peak or bump labeled as Position e. The calculated result also shows an extra peak (Position f) at 16 eV, which is not observed in both measured spectra.

Figure S3b compares the calculated Li K-edge XAS spectrum of Li<sub>2</sub>CO<sub>3</sub> with its measured spectra reported by de Clermont Gallerande et al. (2018) by the low-q XRS technique and O'Shaughnessy et al. (2018) by the TEY and FYL methods. The calculated spectrum is in very good agreement with that measured by the low-q XRS technique. Positions of the peaks a, b, and c are at 4.0, 5.5, and 6.8 eV, respectively. The calculated spectrum has an extra peak at 10.5 eV (Position d), which is not observed in the measured spectra. All three spectra have a strong and broad peak (Position e), except that its positions in the two measured spectra are at 12.0 eV but at 11.5 eV in the calculated spectrum.

Figure S3c compares the calculated and measured Li K-edge XANES spectra of Li<sub>2</sub>SiO<sub>3</sub>. Both spectra show five characteristic peaks. It is very interesting to observe that the two spectra have very

similar shapes, but the peak positions in the calculated spectrum are severely shifted to lower energy compared with its measured counterparts. The XANES spectra of  $\text{Li}_2\text{SiO}_3$  are composed of double peaks in the main edge, with a broad and strong band of triplet peaks at the post-edge region. However, when aligning the first peak at 8 eV (Position a). Position b obtained from the experiment is at 9.4 eV, while this position is at 9.1 eV in the calculation. The discrepancies enlarge for the other peaks. Positions c, d, and e of the experimental spectrum are at 14.1, 15.7, and 17.2 eV, while for the calculated spectrum these values are 11.7, 12.6, and 14.7 eV. We suspect that these discrepancies between the calculated and measured Li K-edge XANES spectra of  $\text{Li}_2\text{SiO}_3$  probably arise from different polymorphs investigated, rather than problems with the Li pseudopotentials used in this study.

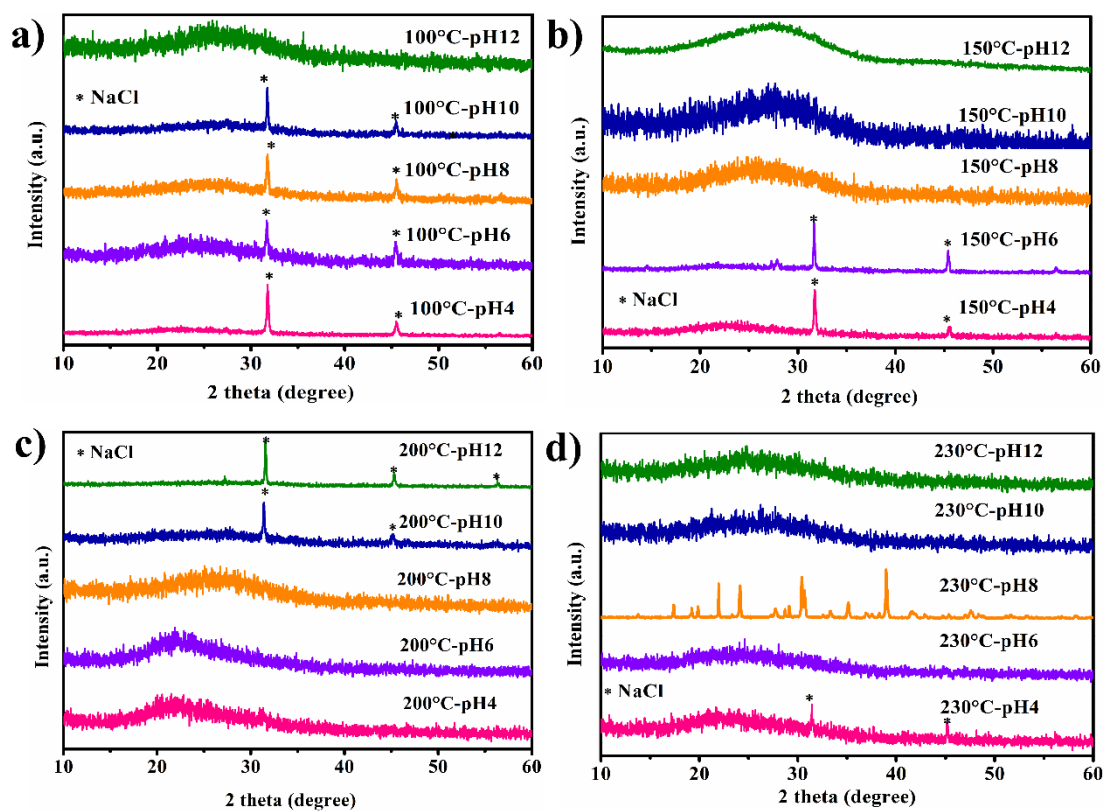

**Figure S1.** Comparison of the powder X-ray diffraction patterns from different synthetic conditions for the duration of 3 days.

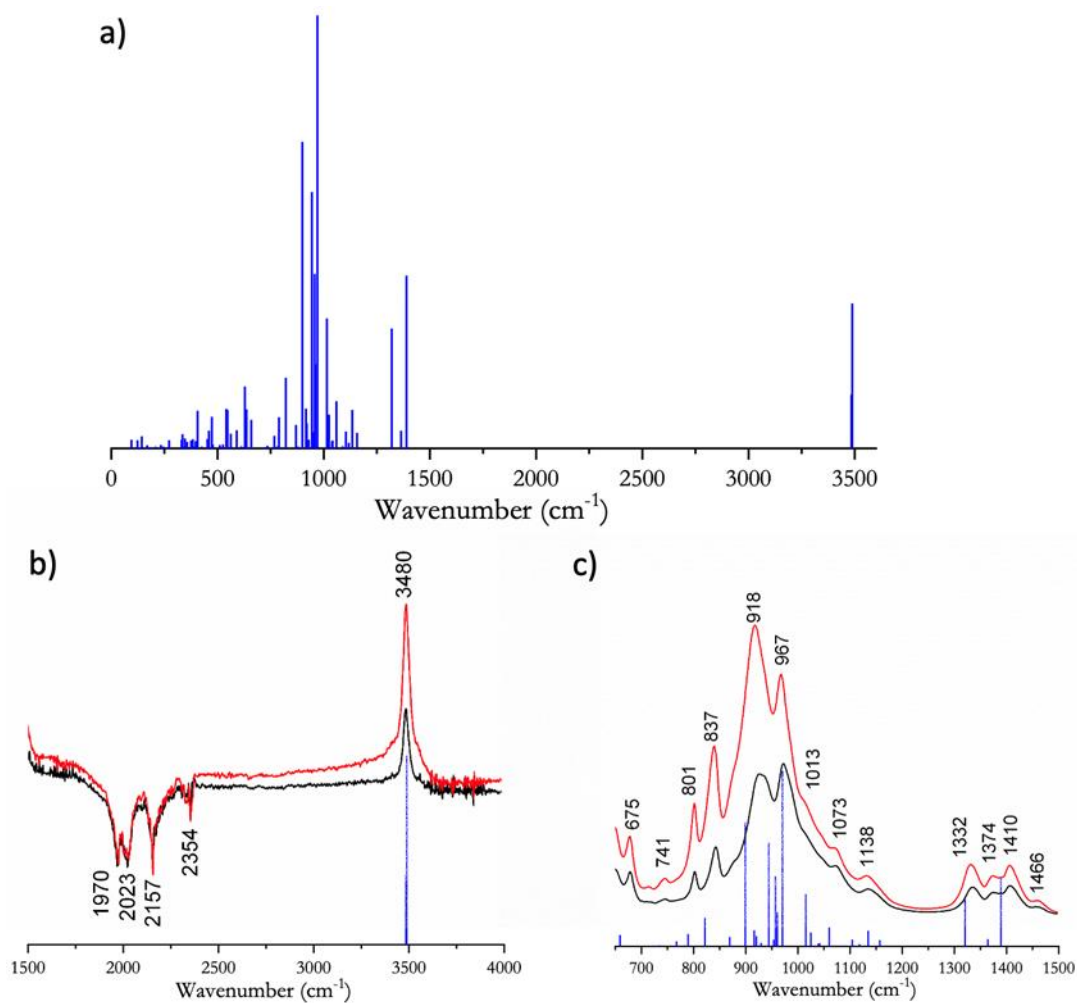

**Figure S2.** (a) Calculated intensities and wavenumbers of the IR-active vibrational modes of jadarite. (b) Comparison of the FTIR spectra of natural (black) and synthetic (red) in the O-H stretch region. Also included for comparison is the calculation intensities (blue) at the high wavenumber region. (c) Comparison of the measured (red and black) spectra and calculated (blue) FTIR intensities at the low wavenumber region.

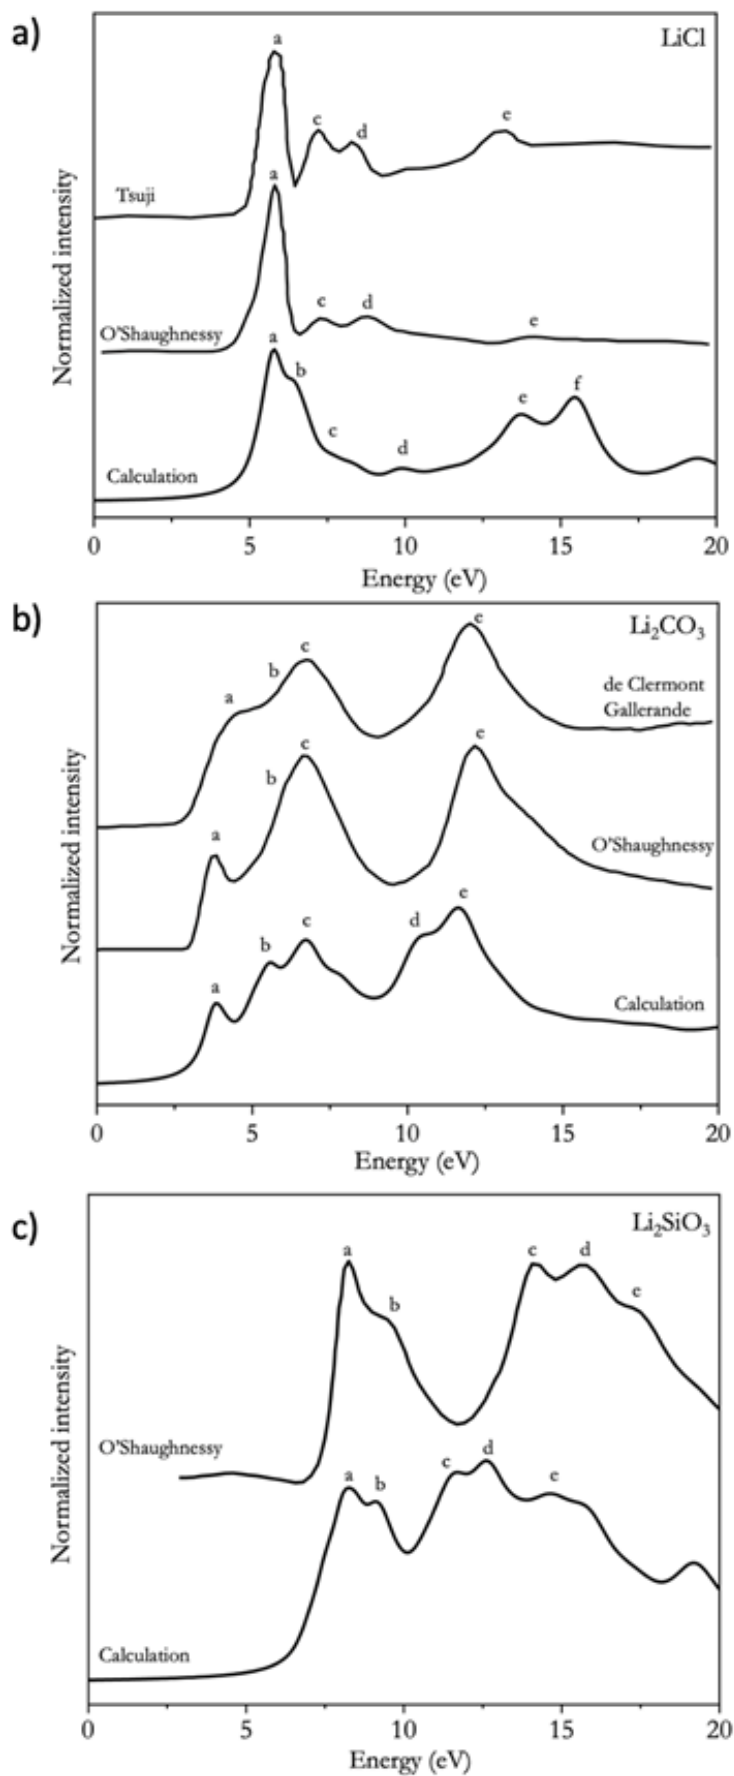

**Figure S3.** Comparison of calculated Li K-edge XANES spectra of model compounds Li<sub>2</sub>CO<sub>3</sub>, LiCl, and Li<sub>2</sub>SiO<sub>3</sub> from the OCEAN code with measured spectra reported by O'Shaughnessy et al. (2018), de Clermont Gallerande et al. (2018), and Tsuji et al. (2002).

**Table S1 Powder X-ray diffraction data of synthetic jadarite**

| <i>(hkl)</i> | $2\theta$ (Cal.) | $2\theta$ (Obs.) | Delta ( $2\theta$ ) | $d$ (Obs.) | Intensity (%) |
|--------------|------------------|------------------|---------------------|------------|---------------|
| (020)        | 12.805           | 12.804           | 0.001               | 6.9081     | 60            |
| (011)        | 15.386           | 15.369           | 0.017               | 5.7606     | 8             |
| (-101)       | 15.760           | 15.761           | -0.002              | 5.6180     | 30            |
| (-111)       | 17.022           | 17.018           | 0.004               | 5.2059     | 9             |
| (120)        | 18.924           | 18.929           | -0.005              | 4.6843     | 90            |
| (-121)       | 20.358           | 20.349           | 0.008               | 4.3605     | 42            |
| (101)        | 23.076           | 23.059           | 0.017               | 3.8539     | 8             |
| (130)        | 23.814           | 23.843           | -0.030              | 3.7288     | 43            |
| (-131)       | 24.980           | 24.873           | 0.108               | 3.5768     | 4             |
| (040)        | 25.773           | 25.754           | 0.020               | 3.4564     | 24            |
| (121)        | 26.477           | 26.471           | 0.006               | 3.3643     | 24            |
| (-112)       | 27.310           | 27.257           | 0.054               | 3.2691     | 4             |
| (200)        | 27.959           | 27.958           | 0.001               | 3.1886     | 100           |
| (002)        | 28.175           | 28.154           | 0.021               | 3.1669     | 78            |
| (012)        | 28.921           | 28.905           | 0.015               | 3.0863     | 23            |
| (140)        | 29.385           | 29.396           | -0.011              | 3.0359     | 52            |
| (131)        | 30.228           | 30.213           | 0.015               | 2.9556     | 85            |
| (022)        | 31.059           | 31.060           | -0.001              | 2.8769     | 9             |
| (-202)       | 31.827           | 31.813           | 0.014               | 2.8105     | 11            |
| (-231)       | 32.846           | 32.874           | -0.027              | 2.7223     | 3             |
| (032)        | 34.356           | 34.374           | -0.018              | 2.6068     | 3             |
| (141)        | 34.865           | 34.964           | -0.099              | 2.5641     | 3             |
| (150)        | 35.375           | 35.356           | 0.019               | 2.5366     | 3             |
| (211)        | 36.388           | 36.347           | 0.041               | 2.4697     | 3             |
| (-142)       | 37.319           | 37.383           | -0.064              | 2.4036     | 4             |
| (240)        | 38.390           | 38.361           | 0.028               | 2.3445     | 12            |
| (-301)       | 39.520           | 39.519           | 0.001               | 2.2784     | 36            |
| (-311)       | 40.077           | 40.091           | -0.015              | 2.2472     | 56            |
| (160)        | 41.670           | 41.691           | -0.021              | 2.1646     | 14            |
| (-251)       | 42.213           | 42.213           | 0.000               | 2.1391     | 7             |
| (250)        | 43.294           | 43.259           | 0.035               | 2.0897     | 6             |
| (-223)       | 44.021           | 43.995           | 0.027               | 2.0565     | 11            |
| (-133)       | 44.611           | 44.613           | -0.002              | 2.0294     | 8             |
| (161)        | 45.881           | 45.826           | 0.054               | 1.9784     | 5             |
| (-233)       | 46.529           | 46.522           | 0.006               | 1.9505     | 8             |
| (-261)       | 47.759           | 47.766           | -0.007              | 1.9025     | 8             |
| (062)        | 48.877           | 49.072           | -0.195              | 1.8549     | 11            |
| (-342)       | 49.708           | 49.708           | -0.001              | 1.8326     | 8             |
| (123)        | 51.997           | 52.028           | -0.031              | 1.7563     | 4             |
| (-402)       | 54.244           | 54.233           | 0.011               | 1.6899     | 7             |
| (-421)       | 55.703           | 55.719           | -0.016              | 1.6483     | 7             |

In the FTIR and Raman spectral calculations, the dielectric tensor is given as

$$\epsilon = \begin{pmatrix} 3.748031 & -0.000043 & -0.338468 \\ -0.000043 & 2.395049 & 0.000023 \\ -0.338468 & 0.000023 & 3.068217 \end{pmatrix},$$

and the Born effective charge tensors are listed in Table S2, the optimized structure in Table S3, and the eigenvectors of the dynamical matrix of jadarite in Table S3.

**Table S2 Born effective charge tensors ( $e$ ) in the jadarite structure**

| Ion | $Z_{xx}$ | $Z_{xy}$ | $Z_{xz}$ | $Z_{yx}$ | $Z_{yy}$ | $Z_{yz}$ | $Z_{zx}$ | $Z_{xy}$ | $Z_{zz}$ |
|-----|----------|----------|----------|----------|----------|----------|----------|----------|----------|
| Li1 | 1.03     | -0.08    | 0.04     | -0.05    | 1.01     | -0.03    | 0.02     | 0.01     | 1.08     |
| Li2 | 1.03     | -0.08    | 0.04     | -0.05    | 1.01     | -0.03    | 0.02     | 0.01     | 1.08     |
| Li3 | 1.03     | 0.08     | 0.04     | 0.05     | 1.01     | 0.03     | 0.02     | -0.01    | 1.08     |
| Li4 | 1.03     | 0.08     | 0.04     | 0.05     | 1.01     | 0.03     | 0.02     | -0.01    | 1.08     |
| Na1 | 1.12     | -0.01    | 0.03     | -0.03    | 1.15     | -0.03    | 0.04     | -0.08    | 1.10     |
| Na2 | 1.12     | -0.01    | 0.03     | -0.03    | 1.15     | -0.03    | 0.04     | -0.08    | 1.10     |
| Na3 | 1.12     | 0.01     | 0.03     | 0.03     | 1.15     | 0.03     | 0.04     | 0.08     | 1.10     |
| Na4 | 1.12     | 0.01     | 0.03     | 0.03     | 1.15     | 0.03     | 0.04     | 0.08     | 1.10     |
| B1  | 2.55     | -0.35    | 0.28     | -0.31    | 2.34     | -0.19    | 0.02     | -0.53    | 2.37     |
| B2  | 2.55     | -0.35    | 0.28     | -0.31    | 2.34     | -0.19    | 0.02     | -0.53    | 2.37     |
| B3  | 2.55     | 0.35     | 0.28     | 0.31     | 2.34     | 0.19     | 0.02     | 0.53     | 2.37     |
| B4  | 2.55     | 0.35     | 0.28     | 0.31     | 2.34     | 0.19     | 0.02     | 0.53     | 2.37     |
| B5  | 2.40     | -0.53    | -0.10    | -0.29    | 2.34     | -0.25    | 0.25     | -0.14    | 2.45     |
| B6  | 2.40     | -0.53    | -0.10    | -0.29    | 2.34     | -0.25    | 0.25     | -0.14    | 2.45     |
| B7  | 2.40     | 0.53     | -0.10    | 0.29     | 2.34     | 0.25     | 0.25     | 0.14     | 2.45     |
| B8  | 2.40     | 0.53     | -0.10    | 0.29     | 2.34     | 0.25     | 0.25     | 0.14     | 2.45     |
| B9  | 1.74     | 0.13     | 0.79     | 0.29     | 2.52     | -0.46    | 0.72     | -0.43    | 1.44     |
| B10 | 1.74     | 0.13     | 0.79     | 0.29     | 2.52     | -0.46    | 0.72     | -0.43    | 1.44     |
| B11 | 1.74     | -0.13    | 0.79     | -0.29    | 2.52     | 0.46     | 0.72     | 0.43     | 1.44     |
| B12 | 1.74     | -0.13    | 0.79     | -0.29    | 2.52     | 0.46     | 0.72     | 0.43     | 1.44     |
| Si1 | 3.18     | -0.25    | -0.08    | 0.09     | 2.81     | 0.20     | -0.14    | -0.09    | 3.29     |
| Si2 | 3.18     | -0.25    | -0.08    | 0.09     | 2.81     | 0.20     | -0.14    | -0.09    | 3.29     |
| Si3 | 3.18     | 0.25     | -0.08    | -0.09    | 2.81     | -0.20    | -0.14    | 0.09     | 3.29     |
| Si4 | 3.18     | 0.25     | -0.08    | -0.09    | 2.81     | -0.20    | -0.14    | 0.09     | 3.29     |
| O1  | -1.31    | 0.08     | -0.15    | 0.05     | -1.46    | -0.70    | -0.08    | -0.75    | -2.28    |
| O2  | -1.31    | 0.08     | -0.15    | 0.05     | -1.46    | -0.70    | -0.08    | -0.75    | -2.28    |
| O3  | -1.31    | -0.08    | -0.15    | -0.05    | -1.46    | 0.70     | -0.08    | 0.75     | -2.28    |
| O4  | -1.31    | -0.08    | -0.15    | -0.05    | -1.46    | 0.70     | -0.08    | 0.75     | -2.28    |
| O5  | -2.19    | -0.61    | 0.34     | -0.56    | -1.47    | 0.23     | 0.29     | 0.30     | -1.39    |
| O6  | -2.19    | -0.61    | 0.35     | -0.56    | -1.47    | 0.23     | 0.29     | 0.30     | -1.39    |
| O7  | -2.19    | 0.61     | 0.34     | 0.56     | -1.47    | -0.23    | 0.29     | -0.30    | -1.39    |
| O8  | -2.19    | 0.61     | 0.34     | 0.56     | -1.47    | -0.23    | 0.29     | -0.30    | -1.39    |
| O9  | -2.27    | 0.43     | 0.13     | 0.30     | -1.50    | -0.24    | 0.18     | -0.15    | -1.30    |
| O10 | -2.27    | 0.43     | 0.13     | 0.30     | -1.50    | -0.24    | 0.18     | -0.15    | -1.30    |
| O11 | -2.27    | -0.43    | 0.13     | -0.30    | -1.50    | 0.24     | 0.18     | 0.15     | -1.30    |
| O12 | -2.27    | -0.43    | 0.13     | -0.30    | -1.50    | 0.24     | 0.18     | 0.15     | -1.30    |
| O13 | -1.13    | 0.12     | -0.10    | 0.05     | -1.49    | 0.44     | -0.18    | 0.52     | -2.30    |



|     |       |       |       |       |       |       |       |       |       |
|-----|-------|-------|-------|-------|-------|-------|-------|-------|-------|
| O14 | -1.13 | 0.12  | -0.10 | 0.05  | -1.49 | 0.44  | -0.18 | 0.52  | -2.30 |
| O15 | -1.13 | -0.12 | -0.10 | -0.05 | -1.49 | -0.44 | -0.18 | -0.52 | -2.30 |
| O16 | -1.13 | -0.12 | -0.10 | -0.05 | -1.49 | -0.44 | -0.18 | -0.52 | -2.30 |
| O17 | -1.44 | -0.56 | -0.34 | -0.61 | -1.92 | 0.06  | -0.32 | -0.06 | -1.09 |
| O18 | -1.44 | -0.56 | -0.34 | -0.61 | -1.92 | 0.06  | -0.32 | -0.06 | -1.09 |
| O19 | -1.44 | 0.56  | -0.34 | 0.61  | -1.92 | -0.06 | -0.32 | 0.06  | -1.09 |
| O20 | -1.44 | 0.56  | -0.34 | 0.61  | -1.92 | -0.06 | -0.32 | 0.06  | -1.09 |
| O21 | -1.31 | 0.23  | -0.41 | 0.11  | -1.87 | 0.55  | -0.41 | 0.45  | -1.34 |
| O22 | -1.31 | 0.23  | -0.41 | 0.11  | -1.87 | 0.55  | -0.41 | 0.46  | -1.34 |
| O23 | -1.31 | -0.23 | -0.41 | -0.11 | -1.87 | -0.55 | -0.41 | -0.46 | -1.34 |
| O24 | -1.31 | -0.23 | -0.41 | -0.11 | -1.87 | -0.55 | -0.41 | -0.46 | -1.34 |
| O25 | -2.02 | -0.06 | -0.50 | -0.05 | -1.10 | 0.12  | -0.50 | 0.06  | -1.72 |
| O26 | -2.02 | -0.06 | -0.50 | -0.05 | -1.10 | 0.12  | -0.50 | 0.06  | -1.72 |
| O27 | -2.02 | 0.06  | -0.50 | 0.05  | -1.10 | -0.12 | -0.50 | -0.06 | -1.72 |
| O28 | -2.02 | 0.06  | -0.50 | 0.05  | -1.10 | -0.12 | -0.50 | -0.06 | -1.72 |
| O29 | -0.82 | 0.05  | -0.07 | -0.01 | -1.88 | 0.29  | -0.05 | 0.26  | -0.98 |
| O30 | -0.82 | 0.05  | -0.07 | -0.01 | -1.88 | 0.29  | -0.05 | 0.26  | -0.98 |
| O31 | -0.82 | -0.05 | -0.07 | 0.01  | -1.88 | -0.29 | -0.05 | -0.26 | -0.98 |
| O32 | -0.82 | -0.05 | -0.07 | 0.01  | -1.88 | -0.29 | -0.05 | -0.26 | -0.98 |
| H1  | 0.48  | -0.12 | 0.14  | -0.18 | 0.53  | -0.22 | 0.15  | -0.15 | 0.66  |
| H2  | 0.48  | -0.12 | 0.14  | -0.18 | 0.53  | -0.22 | 0.15  | -0.15 | 0.66  |
| H3  | 0.48  | 0.12  | 0.14  | 0.18  | 0.53  | 0.22  | 0.15  | 0.15  | 0.66  |
| H4  | 0.48  | 0.12  | 0.14  | 0.18  | 0.53  | 0.22  | 0.15  | 0.15  | 0.66  |

**Table S3. Optimized crystal structure of jadarite.**

The space group of the optimized jadarite structure is  $P2_1/c$ . The axial lengths are  $a=6.2720$  Å,  $b=13.8016$  Å,  $c=7.6878$  Å, and  $\alpha=\gamma=90^\circ$ ,  $\beta=124.0890^\circ$ . The atomic sites are

|     |          |          |          |
|-----|----------|----------|----------|
| Li1 | 0.45798  | 0.19886  | 0.12848  |
| Na1 | -0.03387 | -0.00840 | 0.75597  |
| B1  | 0.23143  | 0.15057  | 0.68356  |
| B2  | 0.68011  | 0.35107  | 0.41713  |
| B3  | 0.53748  | 0.50394  | 0.78711  |
| Si1 | 0.04466  | 0.75263  | 0.20813  |
| O1  | 0.81353  | 0.72265  | -0.02222 |
| O2  | 0.27725  | 0.78501  | 0.20978  |
| O3  | -0.02544 | 0.84769  | 0.29401  |
| O4  | 0.12540  | 0.65717  | 0.35947  |
| O5  | 0.75340  | 0.55061  | 0.88402  |
| O6  | 0.68129  | 0.45526  | 0.35524  |
| O7  | 0.54853  | 0.67206  | 0.61687  |
| O8  | 0.53471  | 0.40694  | 0.83851  |
| H1  | 0.69386  | 0.38360  | -0.04784 |

Also attached below is a copy of the CIF file of the optimized crystal structure of hadarite.

# CIF file created by FINDSYM, version 7.1.3

data\_findsym-output

\_audit\_creation\_method FINDSYM

\_cell\_length\_a 6.762000000

\_cell\_length\_b 13.801600000

\_cell\_length\_c 7.687800000

\_cell\_angle\_alpha 90.000000000

\_cell\_angle\_beta 124.088997000

\_cell\_angle\_gamma 90.000000000

\_cell\_volume 594.1896961515

\_symmetry\_space\_group\_name\_H-M "P 1 21/c 1"

\_symmetry\_Int\_Tables\_number 14

\_space\_group.reference\_setting '014:-P 2ybc'

\_space\_group.transform\_Pp\_abc a,b,c;0,0,0

loop\_

\_space\_group\_symop\_id

\_space\_group\_symop\_operation\_xyz

1 x,y,z  
2 -x,y+1/2,-z+1/2  
3 -x,-y,-z  
4 x,-y+1/2,z+1/2

loop\_

\_atom\_site\_label

\_atom\_site\_type\_symbol

\_atom\_site\_symmetry\_multiplicity

\_atom\_site\_Wyckoff\_symbol

\_atom\_site\_fract\_x

\_atom\_site\_fract\_y

\_atom\_site\_fract\_z

\_atom\_site\_occupancy

\_atom\_site\_fract\_symmform

|     |    |     |          |          |          |         |          |
|-----|----|-----|----------|----------|----------|---------|----------|
| Li1 | Li | 4 e | 0.45798  | 0.19886  | 0.12848  | 1.00000 | Dx,Dy,Dz |
| Na1 | Na | 4 e | -0.03387 | -0.00840 | 0.75597  | 1.00000 | Dx,Dy,Dz |
| B1  | B  | 4 e | 0.23143  | 0.15057  | 0.68356  | 1.00000 | Dx,Dy,Dz |
| B2  | B  | 4 e | 0.68011  | 0.35107  | 0.41713  | 1.00000 | Dx,Dy,Dz |
| B3  | B  | 4 e | 0.53748  | 0.50394  | 0.78711  | 1.00000 | Dx,Dy,Dz |
| Si1 | Si | 4 e | 0.04466  | 0.75263  | 0.20813  | 1.00000 | Dx,Dy,Dz |
| O1  | O  | 4 e | 0.81353  | 0.72265  | -0.02222 | 1.00000 | Dx,Dy,Dz |
| O2  | O  | 4 e | 0.27725  | 0.78501  | 0.20978  | 1.00000 | Dx,Dy,Dz |
| O3  | O  | 4 e | -0.02544 | 0.84769  | 0.29401  | 1.00000 | Dx,Dy,Dz |
| O4  | O  | 4 e | 0.12540  | 0.65717  | 0.35947  | 1.00000 | Dx,Dy,Dz |
| O5  | O  | 4 e | 0.75340  | 0.55061  | 0.88402  | 1.00000 | Dx,Dy,Dz |
| O6  | O  | 4 e | 0.68129  | 0.45526  | 0.35524  | 1.00000 | Dx,Dy,Dz |
| O7  | O  | 4 e | 0.54853  | 0.67206  | 0.61687  | 1.00000 | Dx,Dy,Dz |
| O8  | O  | 4 e | 0.53471  | 0.40694  | 0.83851  | 1.00000 | Dx,Dy,Dz |
| H1  | H  | 4 e | 0.69386  | 0.38360  | -0.04784 | 1.00000 | Dx,Dy,Dz |

# end of cif



**Table S4. Eigenvectors of the dynamic matrix of jadarite.**

| 1 f = | 104.566043 THz | 657.007825 2PiTHz | 3487.947645 cm <sup>-1</sup> | 432.450548 meV |           |           |  |
|-------|----------------|-------------------|------------------------------|----------------|-----------|-----------|--|
|       | X              | Y                 | Z                            | dx             | dy        | dz        |  |
| Li    | 3.769818       | 9.645336          | 4.001386                     | 0.000043       | -0.000709 | 0.000767  |  |
| Li    | -1.316675      | 4.156264          | 2.365404                     | 0.000043       | -0.000711 | 0.000768  |  |
| Li    | -3.471104      | 2.744536          | 5.548798                     | 0.000043       | 0.000707  | 0.000765  |  |
| Li    | 5.924247       | 11.057064         | 0.817991                     | 0.000044       | 0.000714  | 0.000772  |  |
| Na    | 2.049025       | 6.784862          | 1.629696                     | -0.000007      | -0.000273 | 0.000017  |  |
| Na    | 0.404117       | 7.016739          | 4.737094                     | -0.000007      | -0.000273 | 0.000018  |  |
| Na    | 2.558546       | 13.685662         | 1.553699                     | -0.000007      | 0.000272  | 0.000018  |  |
| Na    | -0.105403      | 0.115939          | 4.813091                     | -0.000008      | 0.000274  | 0.000017  |  |
| B     | 4.155007       | 8.978944          | 1.168663                     | 0.001449       | -0.000201 | -0.000021 |  |
| B     | -1.701865      | 4.822656          | 5.198127                     | 0.001451       | -0.000201 | -0.000023 |  |
| B     | 0.452564       | 2.078144          | 2.014732                     | 0.001443       | 0.000197  | -0.000020 |  |
| B     | 2.000578       | 11.723457         | 4.352058                     | 0.001459       | 0.000205  | -0.000024 |  |
| B     | -2.733891      | 11.746082         | 5.839177                     | -0.000095      | 0.000403  | 0.000005  |  |
| B     | 5.187034       | 2.055518          | 0.527613                     | -0.000095      | 0.000396  | 0.000004  |  |
| B     | 3.032605       | 4.845282          | 3.711007                     | -0.000095      | -0.000400 | 0.000005  |  |
| B     | -0.579463      | 8.956318          | 2.655782                     | -0.000095      | -0.000399 | 0.000003  |  |
| B     | -0.983708      | 0.054306          | 1.827988                     | 0.000890       | -0.000487 | 0.000911  |  |
| B     | 3.436850       | 13.747295         | 4.538802                     | 0.000886       | -0.000474 | 0.000901  |  |
| B     | 5.591279       | 6.955106          | 1.355407                     | 0.000888       | 0.000480  | 0.000906  |  |
| B     | -3.138137      | 6.846495          | 5.011383                     | 0.000887       | 0.000479  | 0.000905  |  |
| Si    | 0.631772       | 3.486686          | 4.508512                     | -0.000297      | 0.000544  | 0.000171  |  |
| Si    | 1.821370       | 10.314915         | 1.858278                     | -0.000296      | 0.000544  | 0.000170  |  |
| Si    | -0.333059      | 10.387486         | 5.041673                     | -0.000299      | -0.000546 | 0.000173  |  |
| Si    | 2.786201       | 3.414115          | 1.325117                     | -0.000295      | -0.000542 | 0.000170  |  |
| O     | 0.061445       | 3.072947          | 3.041906                     | -0.000159      | -0.000051 | -0.000135 |  |
| O     | 2.391697       | 10.728653         | 3.324884                     | -0.000161      | -0.000053 | -0.000135 |  |
| O     | 4.546126       | 9.973747          | 0.141489                     | -0.000160      | 0.000053  | -0.000137 |  |
| O     | -2.092984      | 3.827853          | 6.225301                     | -0.000160      | 0.000052  | -0.000134 |  |
| O     | 2.197450       | 3.933608          | 4.519003                     | 0.000286       | -0.000068 | 0.000012  |  |
| O     | 0.255692       | 9.867992          | 1.847787                     | 0.000286       | -0.000069 | 0.000014  |  |
| O     | -1.898737      | 10.834409         | 5.031182                     | 0.000287       | 0.000068  | 0.000012  |  |
| O     | 4.351879       | 2.967192          | 1.335608                     | 0.000285       | 0.000069  | 0.000014  |  |

|   |           |           |          |           |           |           |
|---|-----------|-----------|----------|-----------|-----------|-----------|
| O | -0.212316 | 4.798696  | 5.055280 | -0.000542 | -0.000359 | -0.000661 |
| O | 2.665458  | 9.002905  | 1.311510 | -0.000541 | -0.000359 | -0.000659 |
| O | 0.511030  | 11.699496 | 4.494905 | -0.000545 | 0.000361  | -0.000664 |
| O | 1.942113  | 2.102105  | 1.871885 | -0.000538 | 0.000357  | -0.000657 |
| O | 0.525580  | 2.169271  | 5.472081 | 0.000061  | -0.000348 | 0.000013  |
| O | 1.927562  | 11.632329 | 0.894709 | 0.000061  | -0.000349 | 0.000014  |
| O | -0.226867 | 9.070071  | 4.078104 | 0.000061  | 0.000350  | 0.000014  |
| O | 2.680009  | 4.731529  | 2.288686 | 0.000061  | 0.000348  | 0.000013  |
| O | 0.058846  | 0.698526  | 2.444964 | 0.000038  | 0.000140  | 0.000080  |
| O | 2.394296  | 13.103075 | 3.921826 | 0.000031  | 0.000132  | 0.000079  |
| O | 4.548725  | 7.599326  | 0.738431 | 0.000035  | -0.000136 | 0.000080  |
| O | -2.095583 | 6.202275  | 5.628359 | 0.000033  | -0.000135 | 0.000079  |
| O | -2.459230 | 13.184059 | 5.445139 | -0.000265 | 0.000185  | -0.000335 |
| O | 4.912372  | 0.617542  | 0.921651 | -0.000269 | 0.000192  | -0.000339 |
| O | 2.757943  | 6.283259  | 4.105046 | -0.000266 | -0.000188 | -0.000336 |
| O | -0.304801 | 7.518342  | 2.261744 | -0.000268 | -0.000188 | -0.000338 |
| O | -0.175430 | 2.374756  | 0.744070 | -0.000330 | -0.000051 | -0.000244 |
| O | 2.628573  | 11.426844 | 5.622720 | -0.000333 | -0.000053 | -0.000246 |
| O | 4.783002  | 9.275557  | 2.439325 | -0.000331 | 0.000051  | -0.000245 |
| O | -2.329859 | 4.526044  | 3.927465 | -0.000332 | 0.000053  | -0.000244 |
| O | -1.223866 | 12.517207 | 2.155216 | 0.017560  | -0.011164 | 0.022441  |
| O | 3.677009  | 1.284394  | 4.211574 | 0.017386  | -0.011056 | 0.022221  |
| O | 5.831438  | 5.616407  | 1.028179 | 0.017468  | 0.011108  | 0.022324  |
| O | -3.378295 | 8.185194  | 5.338611 | 0.017451  | 0.011096  | 0.022304  |
| H | -0.637445 | 12.195109 | 2.878812 | -0.282545 | 0.170066  | -0.358956 |
| H | 3.090587  | 1.606491  | 3.487978 | -0.279741 | 0.168387  | -0.355403 |
| H | 5.245016  | 5.294309  | 0.304583 | -0.281072 | -0.169188 | -0.357091 |
| H | -2.791874 | 8.507292  | 6.062207 | -0.280789 | -0.169014 | -0.356729 |

2 f = 104.467378 THz 656.387895 2PiTHz 3484.656537 cm-1 432.042503

meV

|    | X         | Y         | Z        | dx        | dy        | dz        |
|----|-----------|-----------|----------|-----------|-----------|-----------|
| Li | 3.769818  | 9.645336  | 4.001386 | 0.000080  | -0.000702 | 0.000831  |
| Li | -1.316675 | 4.156264  | 2.365404 | -0.000079 | 0.000666  | -0.000758 |
| Li | -3.471104 | 2.744536  | 5.548798 | 0.000080  | 0.000671  | 0.000764  |
| Li | 5.924247  | 11.057064 | 0.817991 | -0.000080 | -0.000699 | -0.000828 |

|    |           |           |          |           |           |           |
|----|-----------|-----------|----------|-----------|-----------|-----------|
| Na | 2.049025  | 6.784862  | 1.629696 | -0.000061 | -0.000158 | 0.000005  |
| Na | 0.404117  | 7.016739  | 4.737094 | 0.000060  | 0.000147  | -0.000004 |
| Na | 2.558546  | 13.685662 | 1.553699 | -0.000060 | 0.000149  | 0.000004  |
| Na | -0.105403 | 0.115939  | 4.813091 | 0.000062  | -0.000157 | -0.000005 |
| B  | 4.155007  | 8.978944  | 1.168663 | 0.001785  | -0.000731 | -0.000510 |
| B  | -1.701865 | 4.822656  | 5.198127 | -0.001667 | 0.000761  | 0.000485  |
| B  | 0.452564  | 2.078144  | 2.014732 | 0.001678  | 0.000764  | -0.000486 |
| B  | 2.000578  | 11.723457 | 4.352058 | -0.001779 | -0.000731 | 0.000511  |
| B  | -2.733891 | 11.746082 | 5.839177 | -0.000051 | -0.000699 | -0.000330 |
| B  | 5.187034  | 2.055518  | 0.527613 | 0.000041  | 0.000710  | 0.000289  |
| B  | 3.032605  | 4.845282  | 3.711007 | -0.000042 | 0.000707  | -0.000289 |
| B  | -0.579463 | 8.956318  | 2.655782 | 0.000051  | -0.000700 | 0.000331  |
| B  | -0.983708 | 0.054306  | 1.827988 | -0.000453 | 0.001368  | -0.001131 |
| B  | 3.436850  | 13.747295 | 4.538802 | 0.000394  | -0.001280 | 0.001055  |
| B  | 5.591279  | 6.955106  | 1.355407 | -0.000388 | -0.001276 | -0.001049 |
| B  | -3.138137 | 6.846495  | 5.011383 | 0.000457  | 0.001368  | 0.001134  |
| Si | 0.631772  | 3.486686  | 4.508512 | 0.000347  | -0.000360 | -0.000374 |
| Si | 1.821370  | 10.314915 | 1.858278 | -0.000372 | 0.000413  | 0.000412  |
| Si | -0.333059 | 10.387486 | 5.041673 | 0.000371  | 0.000411  | -0.000412 |
| Si | 2.786201  | 3.414115  | 1.325117 | -0.000349 | -0.000363 | 0.000376  |
| O  | 0.061445  | 3.072947  | 3.041906 | -0.000202 | 0.000058  | 0.000358  |
| O  | 2.391697  | 10.728653 | 3.324884 | 0.000216  | -0.000092 | -0.000406 |
| O  | 4.546126  | 9.973747  | 0.141489 | -0.000217 | -0.000092 | 0.000405  |
| O  | -2.092984 | 3.827853  | 6.225301 | 0.000201  | 0.000058  | -0.000359 |
| O  | 2.197450  | 3.933608  | 4.519003 | -0.000254 | -0.000225 | 0.000180  |
| O  | 0.255692  | 9.867992  | 1.847787 | 0.000264  | 0.000220  | -0.000192 |
| O  | -1.898737 | 10.834409 | 5.031182 | -0.000263 | 0.000220  | 0.000192  |
| O  | 4.351879  | 2.967192  | 1.335608 | 0.000257  | -0.000225 | -0.000180 |
| O  | -0.212316 | 4.798696  | 5.055280 | 0.000698  | 0.000239  | 0.000602  |
| O  | 2.665458  | 9.002905  | 1.311510 | -0.000742 | -0.000284 | -0.000660 |
| O  | 0.511030  | 11.699496 | 4.494905 | 0.000739  | -0.000283 | 0.000657  |
| O  | 1.942113  | 2.102105  | 1.871885 | -0.000702 | 0.000241  | -0.000606 |
| O  | 0.525580  | 2.169271  | 5.472081 | -0.000033 | -0.000028 | -0.000048 |
| O  | 1.927562  | 11.632329 | 0.894709 | 0.000038  | 0.000011  | 0.000064  |
| O  | -0.226867 | 9.070071  | 4.078104 | -0.000037 | 0.000012  | -0.000064 |
| O  | 2.680009  | 4.731529  | 2.288686 | 0.000034  | -0.000026 | 0.000048  |

|   |           |           |          |           |           |           |
|---|-----------|-----------|----------|-----------|-----------|-----------|
| O | 0.058846  | 0.698526  | 2.444964 | -0.000601 | -0.000823 | 0.000020  |
| O | 2.394296  | 13.103075 | 3.921826 | 0.000591  | 0.000789  | -0.000028 |
| O | 4.548725  | 7.599326  | 0.738431 | -0.000589 | 0.000787  | 0.000029  |
| O | -2.095583 | 6.202275  | 5.628359 | 0.000601  | -0.000823 | -0.000019 |
| O | -2.459230 | 13.184059 | 5.445139 | -0.000247 | 0.000623  | -0.000433 |
| O | 4.912372  | 0.617542  | 0.921651 | 0.000269  | -0.000660 | 0.000468  |
| O | 2.757943  | 6.283259  | 4.105046 | -0.000271 | -0.000659 | -0.000470 |
| O | -0.304801 | 7.518342  | 2.261744 | 0.000244  | 0.000621  | 0.000430  |
| O | -0.175430 | 2.374756  | 0.744070 | -0.000337 | -0.000229 | -0.000159 |
| O | 2.628573  | 11.426844 | 5.622720 | 0.000362  | 0.000229  | 0.000182  |
| O | 4.783002  | 9.275557  | 2.439325 | -0.000364 | 0.000228  | -0.000183 |
| O | -2.329859 | 4.526044  | 3.927465 | 0.000336  | -0.000229 | 0.000157  |
| O | -1.223866 | 12.517207 | 2.155216 | -0.018221 | 0.011183  | -0.023066 |
| O | 3.677009  | 1.284394  | 4.211574 | 0.016960  | -0.010408 | 0.021460  |
| O | 5.831438  | 5.616407  | 1.028179 | -0.016838 | -0.010330 | -0.021304 |
| O | -3.378295 | 8.185194  | 5.338611 | 0.018289  | 0.011228  | 0.023154  |
| H | -0.637445 | 12.195109 | 2.878812 | 0.291398  | -0.174784 | 0.369933  |
| H | 3.090587  | 1.606491  | 3.487978 | -0.271188 | 0.162708  | -0.344237 |
| H | 5.245016  | 5.294309  | 0.304583 | 0.269204  | 0.161515  | 0.341716  |
| H | -2.791874 | 8.507292  | 6.062207 | -0.292510 | -0.175457 | -0.371350 |

3 f = 104.459650 THz    656.339336 2PiTHz    3484.398748 cm-1    432.010541 meV

|    | X         | Y         | Z        | dx        | dy        | dz        |
|----|-----------|-----------|----------|-----------|-----------|-----------|
| Li | 3.769818  | 9.645336  | 4.001386 | -0.000001 | -0.000380 | 0.000845  |
| Li | -1.316675 | 4.156264  | 2.365404 | 0.000006  | -0.000443 | 0.000920  |
| Li | -3.471104 | 2.744536  | 5.548798 | -0.000005 | -0.000432 | -0.000906 |
| Li | 5.924247  | 11.057064 | 0.817991 | -0.000000 | -0.000390 | -0.000858 |
| Na | 2.049025  | 6.784862  | 1.629696 | -0.000012 | -0.000123 | 0.000012  |
| Na | 0.404117  | 7.016739  | 4.737094 | -0.000018 | -0.000138 | 0.000013  |
| Na | 2.558546  | 13.685662 | 1.553699 | 0.000017  | -0.000135 | -0.000013 |
| Na | -0.105403 | 0.115939  | 4.813091 | 0.000013  | -0.000126 | -0.000012 |
| B  | 4.155007  | 8.978944  | 1.168663 | 0.001344  | 0.000441  | -0.000312 |
| B  | -1.701865 | 4.822656  | 5.198127 | 0.001508  | 0.000368  | -0.000354 |
| B  | 0.452564  | 2.078144  | 2.014732 | -0.001477 | 0.000382  | 0.000350  |
| B  | 2.000578  | 11.723457 | 4.352058 | -0.001374 | 0.000426  | 0.000316  |



|    |           |           |          |           |           |           |
|----|-----------|-----------|----------|-----------|-----------|-----------|
| B  | -2.733891 | 11.746082 | 5.839177 | -0.000114 | 0.000134  | -0.000522 |
| B  | 5.187034  | 2.055518  | 0.527613 | -0.000119 | 0.000091  | -0.000548 |
| B  | 3.032605  | 4.845282  | 3.711007 | 0.000118  | 0.000079  | 0.000546  |
| B  | -0.579463 | 8.956318  | 2.655782 | 0.000115  | 0.000145  | 0.000524  |
| B  | -0.983708 | 0.054306  | 1.827988 | -0.000799 | 0.001123  | -0.000995 |
| B  | 3.436850  | 13.747295 | 4.538802 | -0.000823 | 0.001201  | -0.001059 |
| B  | 5.591279  | 6.955106  | 1.355407 | 0.000831  | 0.001226  | 0.001080  |
| B  | -3.138137 | 6.846495  | 5.011383 | 0.000791  | 0.001098  | 0.000976  |
| Si | 0.631772  | 3.486686  | 4.508512 | -0.000321 | 0.000675  | 0.000488  |
| Si | 1.821370  | 10.314915 | 1.858278 | -0.000288 | 0.000635  | 0.000453  |
| Si | -0.333059 | 10.387486 | 5.041673 | 0.000293  | 0.000645  | -0.000457 |
| Si | 2.786201  | 3.414115  | 1.325117 | 0.000315  | 0.000665  | -0.000484 |
| O  | 0.061445  | 3.072947  | 3.041906 | 0.000194  | -0.000435 | -0.000609 |
| O  | 2.391697  | 10.728653 | 3.324884 | 0.000181  | -0.000425 | -0.000576 |
| O  | 4.546126  | 9.973747  | 0.141489 | -0.000178 | -0.000429 | 0.000580  |
| O  | -2.092984 | 3.827853  | 6.225301 | -0.000197 | -0.000431 | 0.000606  |
| O  | 2.197450  | 3.933608  | 4.519003 | 0.000124  | -0.000053 | -0.000158 |
| O  | 0.255692  | 9.867992  | 1.847787 | 0.000098  | -0.000071 | -0.000144 |
| O  | -1.898737 | 10.834409 | 5.031182 | -0.000103 | -0.000070 | 0.000144  |
| O  | 4.351879  | 2.967192  | 1.335608 | -0.000118 | -0.000054 | 0.000158  |
| O  | -0.212316 | 4.798696  | 5.055280 | -0.000580 | -0.000561 | -0.000724 |
| O  | 2.665458  | 9.002905  | 1.311510 | -0.000513 | -0.000534 | -0.000662 |
| O  | 0.511030  | 11.699496 | 4.494905 | 0.000525  | -0.000540 | 0.000674  |
| O  | 1.942113  | 2.102105  | 1.871885 | 0.000567  | -0.000554 | 0.000711  |
| O  | 0.525580  | 2.169271  | 5.472081 | 0.000058  | -0.000216 | 0.000216  |
| O  | 1.927562  | 11.632329 | 0.894709 | 0.000054  | -0.000211 | 0.000211  |
| O  | -0.226867 | 9.070071  | 4.078104 | -0.000055 | -0.000217 | -0.000212 |
| O  | 2.680009  | 4.731529  | 2.288686 | -0.000056 | -0.000210 | -0.000215 |
| O  | 0.058846  | 0.698526  | 2.444964 | -0.000123 | -0.000441 | -0.000122 |
| O  | 2.394296  | 13.103075 | 3.921826 | -0.000158 | -0.000489 | -0.000120 |
| O  | 4.548725  | 7.599326  | 0.738431 | 0.000169  | -0.000504 | 0.000120  |
| O  | -2.095583 | 6.202275  | 5.628359 | 0.000112  | -0.000426 | 0.000122  |
| O  | -2.459230 | 13.184059 | 5.445139 | 0.000312  | -0.000506 | 0.000493  |
| O  | 4.912372  | 0.617542  | 0.921651 | 0.000297  | -0.000469 | 0.000468  |
| O  | 2.757943  | 6.283259  | 4.105046 | -0.000292 | -0.000457 | -0.000459 |
| O  | -0.304801 | 7.518342  | 2.261744 | -0.000317 | -0.000518 | -0.000503 |

|   |           |           |          |           |           |           |
|---|-----------|-----------|----------|-----------|-----------|-----------|
| O | -0.175430 | 2.374756  | 0.744070 | 0.000343  | 0.000005  | 0.000295  |
| O | 2.628573  | 11.426844 | 5.622720 | 0.000321  | -0.000011 | 0.000285  |
| O | 4.783002  | 9.275557  | 2.439325 | -0.000316 | -0.000013 | -0.000282 |
| O | -2.329859 | 4.526044  | 3.927465 | -0.000350 | 0.000007  | -0.000298 |
| O | -1.223866 | 12.517207 | 2.155216 | -0.016973 | 0.010475  | -0.021651 |
| O | 3.677009  | 1.284394  | 4.211574 | -0.018005 | 0.011109  | -0.022958 |
| O | 5.831438  | 5.616407  | 1.028179 | 0.018344  | 0.011317  | 0.023387  |
| O | -3.378295 | 8.185194  | 5.338611 | 0.016655  | 0.010280  | 0.021248  |
| H | -0.637445 | 12.195109 | 2.878812 | 0.272554  | -0.163007 | 0.346634  |
| H | 3.090587  | 1.606491  | 3.487978 | 0.289073  | -0.172924 | 0.367616  |
| H | 5.245016  | 5.294309  | 0.304583 | -0.294487 | -0.176170 | -0.374482 |
| H | -2.791874 | 8.507292  | 6.062207 | -0.267468 | -0.159960 | -0.340184 |

4 f = 104.442827 THz    656.233635 2PiTHz    3483.837595 cm-1    431.940967 meV

|    | X         | Y         | Z        | dx        | dy        | dz        |
|----|-----------|-----------|----------|-----------|-----------|-----------|
| Li | 3.769818  | 9.645336  | 4.001386 | 0.000066  | -0.000573 | 0.000705  |
| Li | -1.316675 | 4.156264  | 2.365404 | -0.000067 | 0.000568  | -0.000692 |
| Li | -3.471104 | 2.744536  | 5.548798 | -0.000067 | -0.000575 | -0.000708 |
| Li | 5.924247  | 11.057064 | 0.817991 | 0.000066  | 0.000565  | 0.000688  |
| Na | 2.049025  | 6.784862  | 1.629696 | -0.000064 | -0.000131 | 0.000000  |
| Na | 0.404117  | 7.016739  | 4.737094 | 0.000064  | 0.000130  | -0.000000 |
| Na | 2.558546  | 13.685662 | 1.553699 | 0.000064  | -0.000132 | -0.000001 |
| Na | -0.105403 | 0.115939  | 4.813091 | -0.000064 | 0.000129  | -0.000000 |
| B  | 4.155007  | 8.978944  | 1.168663 | 0.001671  | -0.000765 | -0.000227 |
| B  | -1.701865 | 4.822656  | 5.198127 | -0.001651 | 0.000774  | 0.000221  |
| B  | 0.452564  | 2.078144  | 2.014732 | -0.001676 | -0.000766 | 0.000226  |
| B  | 2.000578  | 11.723457 | 4.352058 | 0.001643  | 0.000772  | -0.000220 |
| B  | -2.733891 | 11.746082 | 5.839177 | -0.000089 | 0.000648  | -0.000121 |
| B  | 5.187034  | 2.055518  | 0.527613 | 0.000088  | -0.000648 | 0.000111  |
| B  | 3.032605  | 4.845282  | 3.711007 | 0.000090  | 0.000650  | 0.000121  |
| B  | -0.579463 | 8.956318  | 2.655782 | -0.000087 | -0.000646 | -0.000111 |
| B  | -0.983708 | 0.054306  | 1.827988 | 0.000409  | -0.001311 | 0.001071  |
| B  | 3.436850  | 13.747295 | 4.538802 | -0.000428 | 0.001335  | -0.001095 |
| B  | 5.591279  | 6.955106  | 1.355407 | -0.000413 | -0.001314 | -0.001076 |
| B  | -3.138137 | 6.846495  | 5.011383 | 0.000425  | 0.001334  | 0.001092  |

|    |           |           |          |           |           |           |
|----|-----------|-----------|----------|-----------|-----------|-----------|
| Si | 0.631772  | 3.486686  | 4.508512 | 0.000294  | -0.000530 | -0.000209 |
| Si | 1.821370  | 10.314915 | 1.858278 | -0.000299 | 0.000540  | 0.000217  |
| Si | -0.333059 | 10.387486 | 5.041673 | -0.000293 | -0.000528 | 0.000208  |
| Si | 2.786201  | 3.414115  | 1.325117 | 0.000300  | 0.000542  | -0.000218 |
| O  | 0.061445  | 3.072947  | 3.041906 | 0.000171  | 0.000181  | 0.000183  |
| O  | 2.391697  | 10.728653 | 3.324884 | -0.000167 | -0.000188 | -0.000194 |
| O  | 4.546126  | 9.973747  | 0.141489 | -0.000170 | 0.000180  | -0.000182 |
| O  | -2.092984 | 3.827853  | 6.225301 | 0.000167  | -0.000189 | 0.000194  |
| O  | 2.197450  | 3.933608  | 4.519003 | -0.000304 | -0.000006 | -0.000005 |
| O  | 0.255692  | 9.867992  | 1.847787 | 0.000305  | 0.000006  | 0.000002  |
| O  | -1.898737 | 10.834409 | 5.031182 | 0.000302  | -0.000007 | 0.000005  |
| O  | 4.351879  | 2.967192  | 1.335608 | -0.000306 | 0.000005  | -0.000002 |
| O  | -0.212316 | 4.798696  | 5.055280 | 0.000651  | 0.000331  | 0.000657  |
| O  | 2.665458  | 9.002905  | 1.311510 | -0.000659 | -0.000339 | -0.000667 |
| O  | 0.511030  | 11.699496 | 4.494905 | -0.000649 | 0.000329  | -0.000653 |
| O  | 1.942113  | 2.102105  | 1.871885 | 0.000661  | -0.000341 | 0.000669  |
| O  | 0.525580  | 2.169271  | 5.472081 | -0.000078 | 0.000324  | -0.000075 |
| O  | 1.927562  | 11.632329 | 0.894709 | 0.000079  | -0.000326 | 0.000079  |
| O  | -0.226867 | 9.070071  | 4.078104 | 0.000078  | 0.000322  | 0.000075  |
| O  | 2.680009  | 4.731529  | 2.288686 | -0.000079 | -0.000328 | -0.000079 |
| O  | 0.058846  | 0.698526  | 2.444964 | 0.000587  | 0.000809  | 0.000004  |
| O  | 2.394296  | 13.103075 | 3.921826 | -0.000590 | -0.000819 | -0.000007 |
| O  | 4.548725  | 7.599326  | 0.738431 | -0.000588 | 0.000811  | -0.000004 |
| O  | -2.095583 | 6.202275  | 5.628359 | 0.000590  | -0.000819 | 0.000007  |
| O  | -2.459230 | 13.184059 | 5.445139 | 0.000269  | -0.000637 | 0.000487  |
| O  | 4.912372  | 0.617542  | 0.921651 | -0.000262 | 0.000627  | -0.000476 |
| O  | 2.757943  | 6.283259  | 4.105046 | -0.000268 | -0.000636 | -0.000486 |
| O  | -0.304801 | 7.518342  | 2.261744 | 0.000264  | 0.000628  | 0.000478  |
| O  | -0.175430 | 2.374756  | 0.744070 | 0.000324  | 0.000113  | 0.000169  |
| O  | 2.628573  | 11.426844 | 5.622720 | -0.000316 | -0.000112 | -0.000162 |
| O  | 4.783002  | 9.275557  | 2.439325 | -0.000323 | 0.000112  | -0.000168 |
| O  | -2.329859 | 4.526044  | 3.927465 | 0.000319  | -0.000113 | 0.000163  |
| O  | -1.223866 | 12.517207 | 2.155216 | 0.017388  | -0.010663 | 0.021997  |
| O  | 3.677009  | 1.284394  | 4.211574 | -0.017793 | 0.010915  | -0.022515 |
| O  | 5.831438  | 5.616407  | 1.028179 | -0.017480 | -0.010722 | -0.022116 |
| O  | -3.378295 | 8.185194  | 5.338611 | 0.017730  | 0.010874  | 0.022433  |

|   |           |           |          |           |           |           |
|---|-----------|-----------|----------|-----------|-----------|-----------|
| H | -0.637445 | 12.195109 | 2.878812 | -0.278032 | 0.166658  | -0.352701 |
| H | 3.090587  | 1.606491  | 3.487978 | 0.284539  | -0.170559 | 0.360982  |
| H | 5.245016  | 5.294309  | 0.304583 | 0.279518  | 0.167557  | 0.354594  |
| H | -2.791874 | 8.507292  | 6.062207 | -0.283523 | -0.169944 | -0.359686 |

5 f = 41.915422 THz 263.362364 2PiTHz 1398.147943 cm-1 173.348314 meV

|    | X         | Y         | Z        | dx        | dy        | dz        |
|----|-----------|-----------|----------|-----------|-----------|-----------|
| Li | 3.769818  | 9.645336  | 4.001386 | -0.001791 | -0.000291 | -0.001589 |
| Li | -1.316675 | 4.156264  | 2.365404 | 0.001792  | 0.000291  | 0.001590  |
| Li | -3.471104 | 2.744536  | 5.548798 | 0.001787  | -0.000293 | 0.001588  |
| Li | 5.924247  | 11.057064 | 0.817991 | -0.001786 | 0.000294  | -0.001590 |
| Na | 2.049025  | 6.784862  | 1.629696 | 0.001237  | 0.000104  | -0.002613 |
| Na | 0.404117  | 7.016739  | 4.737094 | -0.001237 | -0.000105 | 0.002616  |
| Na | 2.558546  | 13.685662 | 1.553699 | -0.001243 | 0.000105  | 0.002625  |
| Na | -0.105403 | 0.115939  | 4.813091 | 0.001241  | -0.000104 | -0.002624 |
| B  | 4.155007  | 8.978944  | 1.168663 | -0.000211 | -0.015942 | -0.011073 |
| B  | -1.701865 | 4.822656  | 5.198127 | 0.000206  | 0.015939  | 0.011070  |
| B  | 0.452564  | 2.078144  | 2.014732 | 0.000206  | -0.016006 | 0.011113  |
| B  | 2.000578  | 11.723457 | 4.352058 | -0.000208 | 0.015997  | -0.011106 |
| B  | -2.733891 | 11.746082 | 5.839177 | -0.007930 | -0.013025 | 0.002933  |
| B  | 5.187034  | 2.055518  | 0.527613 | 0.007940  | 0.013046  | -0.002939 |
| B  | 3.032605  | 4.845282  | 3.711007 | 0.007905  | -0.012986 | -0.002926 |
| B  | -0.579463 | 8.956318  | 2.655782 | -0.007901 | 0.012981  | 0.002924  |
| B  | -0.983708 | 0.054306  | 1.827988 | 0.090814  | -0.007096 | 0.079543  |
| B  | 3.436850  | 13.747295 | 4.538802 | -0.090717 | 0.007102  | -0.079465 |
| B  | 5.591279  | 6.955106  | 1.355407 | -0.090423 | -0.007086 | -0.079210 |
| B  | -3.138137 | 6.846495  | 5.011383 | 0.090437  | 0.007062  | 0.079212  |
| Si | 0.631772  | 3.486686  | 4.508512 | -0.004120 | 0.001295  | -0.002776 |
| Si | 1.821370  | 10.314915 | 1.858278 | 0.004120  | -0.001294 | 0.002773  |
| Si | -0.333059 | 10.387486 | 5.041673 | 0.004127  | 0.001298  | 0.002761  |
| Si | 2.786201  | 3.414115  | 1.325117 | -0.004130 | -0.001297 | -0.002761 |
| O  | 0.061445  | 3.072947  | 3.041906 | 0.000488  | 0.005529  | 0.003938  |
| O  | 2.391697  | 10.728653 | 3.324884 | -0.000487 | -0.005525 | -0.003934 |
| O  | 4.546126  | 9.973747  | 0.141489 | -0.000488 | 0.005505  | -0.003919 |
| O  | -2.092984 | 3.827853  | 6.225301 | 0.000490  | -0.005504 | 0.003920  |

|   |           |           |          |           |           |           |
|---|-----------|-----------|----------|-----------|-----------|-----------|
| O | 2.197450  | 3.933608  | 4.519003 | 0.004218  | 0.004749  | -0.001245 |
| O | 0.255692  | 9.867992  | 1.847787 | -0.004218 | -0.004749 | 0.001244  |
| O | -1.898737 | 10.834409 | 5.031182 | -0.004225 | 0.004763  | 0.001247  |
| O | 4.351879  | 2.967192  | 1.335608 | 0.004229  | -0.004770 | -0.001252 |
| O | -0.212316 | 4.798696  | 5.055280 | 0.006649  | -0.005831 | -0.002629 |
| O | 2.665458  | 9.002905  | 1.311510 | -0.006649 | 0.005831  | 0.002633  |
| O | 0.511030  | 11.699496 | 4.494905 | -0.006672 | -0.005852 | 0.002644  |
| O | 1.942113  | 2.102105  | 1.871885 | 0.006678  | 0.005855  | -0.002644 |
| O | 0.525580  | 2.169271  | 5.472081 | 0.000510  | -0.005020 | 0.007611  |
| O | 1.927562  | 11.632329 | 0.894709 | -0.000511 | 0.005015  | -0.007602 |
| O | -0.226867 | 9.070071  | 4.078104 | -0.000512 | -0.005001 | -0.007579 |
| O | 2.680009  | 4.731529  | 2.288686 | 0.000512  | 0.005001  | 0.007579  |
| O | 0.058846  | 0.698526  | 2.444964 | -0.028583 | -0.012901 | -0.019387 |
| O | 2.394296  | 13.103075 | 3.921826 | 0.028548  | 0.012882  | 0.019363  |
| O | 4.548725  | 7.599326  | 0.738431 | 0.028456  | -0.012839 | 0.019303  |
| O | -2.095583 | 6.202275  | 5.628359 | -0.028464 | 0.012847  | -0.019305 |
| O | -2.459230 | 13.184059 | 5.445139 | 0.027010  | -0.014841 | 0.027308  |
| O | 4.912372  | 0.617542  | 0.921651 | -0.027035 | 0.014856  | -0.027332 |
| O | 2.757943  | 6.283259  | 4.105046 | -0.026922 | -0.014791 | -0.027216 |
| O | -0.304801 | 7.518342  | 2.261744 | 0.026922  | 0.014798  | 0.027220  |
| O | -0.175430 | 2.374756  | 0.744070 | -0.008035 | 0.000506  | -0.006829 |
| O | 2.628573  | 11.426844 | 5.622720 | 0.008022  | -0.000510 | 0.006826  |
| O | 4.783002  | 9.275557  | 2.439325 | 0.008003  | 0.000507  | 0.006804  |
| O | -2.329859 | 4.526044  | 3.927465 | -0.008001 | -0.000508 | -0.006805 |
| O | -1.223866 | 12.517207 | 2.155216 | -0.010375 | -0.004264 | -0.009315 |
| O | 3.677009  | 1.284394  | 4.211574 | 0.010365  | 0.004255  | 0.009309  |
| O | 5.831438  | 5.616407  | 1.028179 | 0.010331  | -0.004240 | 0.009279  |
| O | -3.378295 | 8.185194  | 5.338611 | -0.010332 | 0.004248  | -0.009278 |
| H | -0.637445 | 12.195109 | 2.878812 | 0.060742  | 0.152588  | 0.012801  |
| H | 3.090587  | 1.606491  | 3.487978 | -0.060686 | -0.152437 | -0.012780 |
| H | 5.245016  | 5.294309  | 0.304583 | -0.060480 | 0.151960  | -0.012756 |
| H | -2.791874 | 8.507292  | 6.062207 | 0.060499  | -0.151988 | 0.012755  |

6 f = 41.899846 THz    263.264500 2PiTHz    1397.628395 cm-1    173.283898  
meV

X            Y            Z            dx            dy            dz

|    |           |           |          |           |           |           |
|----|-----------|-----------|----------|-----------|-----------|-----------|
| Li | 3.769818  | 9.645336  | 4.001386 | -0.001417 | 0.000611  | -0.000249 |
| Li | -1.316675 | 4.156264  | 2.365404 | 0.001417  | -0.000610 | 0.000246  |
| Li | -3.471104 | 2.744536  | 5.548798 | -0.001424 | -0.000610 | -0.000251 |
| Li | 5.924247  | 11.057064 | 0.817991 | 0.001424  | 0.000609  | 0.000255  |
| Na | 2.049025  | 6.784862  | 1.629696 | -0.001285 | -0.000077 | 0.002653  |
| Na | 0.404117  | 7.016739  | 4.737094 | 0.001283  | 0.000078  | -0.002657 |
| Na | 2.558546  | 13.685662 | 1.553699 | -0.001277 | 0.000076  | 0.002649  |
| Na | -0.105403 | 0.115939  | 4.813091 | 0.001282  | -0.000077 | -0.002642 |
| B  | 4.155007  | 8.978944  | 1.168663 | -0.000520 | 0.016554  | 0.010397  |
| B  | -1.701865 | 4.822656  | 5.198127 | 0.000526  | -0.016535 | -0.010383 |
| B  | 0.452564  | 2.078144  | 2.014732 | -0.000523 | -0.016469 | 0.010340  |
| B  | 2.000578  | 11.723457 | 4.352058 | 0.000524  | 0.016502  | -0.010358 |
| B  | -2.733891 | 11.746082 | 5.839177 | -0.008642 | -0.014200 | 0.002995  |
| B  | 5.187034  | 2.055518  | 0.527613 | 0.008617  | 0.014156  | -0.003002 |
| B  | 3.032605  | 4.845282  | 3.711007 | -0.008658 | 0.014223  | 0.003011  |
| B  | -0.579463 | 8.956318  | 2.655782 | 0.008661  | -0.014229 | -0.003007 |
| B  | -0.983708 | 0.054306  | 1.827988 | 0.090751  | -0.006917 | 0.079354  |
| B  | 3.436850  | 13.747295 | 4.538802 | -0.091002 | 0.006886  | -0.079549 |
| B  | 5.591279  | 6.955106  | 1.355407 | 0.091254  | 0.006939  | 0.079784  |
| B  | -3.138137 | 6.846495  | 5.011383 | -0.091166 | -0.006916 | -0.079704 |
| Si | 0.631772  | 3.486686  | 4.508512 | 0.002334  | -0.000845 | -0.003695 |
| Si | 1.821370  | 10.314915 | 1.858278 | -0.002336 | 0.000843  | 0.003707  |
| Si | -0.333059 | 10.387486 | 5.041673 | 0.002322  | 0.000840  | -0.003715 |
| Si | 2.786201  | 3.414115  | 1.325117 | -0.002318 | -0.000839 | 0.003707  |
| O  | 0.061445  | 3.072947  | 3.041906 | -0.000297 | 0.006214  | 0.004419  |
| O  | 2.391697  | 10.728653 | 3.324884 | 0.000295  | -0.006228 | -0.004434 |
| O  | 4.546126  | 9.973747  | 0.141489 | -0.000294 | -0.006246 | 0.004446  |
| O  | -2.092984 | 3.827853  | 6.225301 | 0.000294  | 0.006238  | -0.004437 |
| O  | 2.197450  | 3.933608  | 4.519003 | -0.002438 | -0.004690 | 0.001443  |
| O  | 0.255692  | 9.867992  | 1.847787 | 0.002444  | 0.004692  | -0.001445 |
| O  | -1.898737 | 10.834409 | 5.031182 | -0.002429 | 0.004679  | 0.001443  |
| O  | 4.351879  | 2.967192  | 1.335608 | 0.002422  | -0.004668 | -0.001436 |
| O  | -0.212316 | 4.798696  | 5.055280 | -0.006943 | 0.006109  | 0.003458  |
| O  | 2.665458  | 9.002905  | 1.311510 | 0.006951  | -0.006113 | -0.003466 |
| O  | 0.511030  | 11.699496 | 4.494905 | -0.006931 | -0.006093 | 0.003455  |
| O  | 1.942113  | 2.102105  | 1.871885 | 0.006915  | 0.006086  | -0.003450 |

|   |           |           |          |           |           |           |
|---|-----------|-----------|----------|-----------|-----------|-----------|
| O | 0.525580  | 2.169271  | 5.472081 | -0.000442 | -0.004504 | 0.007266  |
| O | 1.927562  | 11.632329 | 0.894709 | 0.000440  | 0.004513  | -0.007284 |
| O | -0.226867 | 9.070071  | 4.078104 | -0.000439 | 0.004529  | 0.007305  |
| O | 2.680009  | 4.731529  | 2.288686 | 0.000440  | -0.004526 | -0.007300 |
| O | 0.058846  | 0.698526  | 2.444964 | -0.028597 | -0.012987 | -0.019273 |
| O | 2.394296  | 13.103075 | 3.921826 | 0.028671  | 0.013031  | 0.019316  |
| O | 4.548725  | 7.599326  | 0.738431 | -0.028754 | 0.013061  | -0.019375 |
| O | -2.095583 | 6.202275  | 5.628359 | 0.028725  | -0.013051 | 0.019357  |
| O | -2.459230 | 13.184059 | 5.445139 | 0.027196  | -0.014630 | 0.027399  |
| O | 4.912372  | 0.617542  | 0.921651 | -0.027116 | 0.014604  | -0.027326 |
| O | 2.757943  | 6.283259  | 4.105046 | 0.027239  | 0.014662  | 0.027448  |
| O | -0.304801 | 7.518342  | 2.261744 | -0.027272 | -0.014681 | -0.027477 |
| O | -0.175430 | 2.374756  | 0.744070 | -0.007363 | 0.000280  | -0.006354 |
| O | 2.628573  | 11.426844 | 5.622720 | 0.007385  | -0.000280 | 0.006372  |
| O | 4.783002  | 9.275557  | 2.439325 | -0.007410 | -0.000284 | -0.006393 |
| O | -2.329859 | 4.526044  | 3.927465 | 0.007397  | 0.000281  | 0.006383  |
| O | -1.223866 | 12.517207 | 2.155216 | -0.010385 | -0.004006 | -0.009184 |
| O | 3.677009  | 1.284394  | 4.211574 | 0.010430  | 0.004049  | 0.009203  |
| O | 5.831438  | 5.616407  | 1.028179 | -0.010454 | 0.004045  | -0.009233 |
| O | -3.378295 | 8.185194  | 5.338611 | 0.010438  | -0.004041 | 0.009224  |
| H | -0.637445 | 12.195109 | 2.878812 | 0.060793  | 0.145778  | 0.009517  |
| H | 3.090587  | 1.606491  | 3.487978 | -0.060938 | -0.146207 | -0.009585 |
| H | 5.245016  | 5.294309  | 0.304583 | 0.061109  | -0.146630 | 0.009612  |
| H | -2.791874 | 8.507292  | 6.062207 | -0.061069 | 0.146478  | -0.009585 |

7 f = 41.706288 THz 262.048336 2PiTHz 1391.171978 cm-1 172.483404 meV

|    | X         | Y         | Z        | dx        | dy        | dz        |
|----|-----------|-----------|----------|-----------|-----------|-----------|
| Li | 3.769818  | 9.645336  | 4.001386 | -0.000930 | -0.000365 | -0.001739 |
| Li | -1.316675 | 4.156264  | 2.365404 | -0.000934 | -0.000362 | -0.001740 |
| Li | -3.471104 | 2.744536  | 5.548798 | 0.000934  | -0.000363 | 0.001740  |
| Li | 5.924247  | 11.057064 | 0.817991 | 0.000929  | -0.000365 | 0.001739  |
| Na | 2.049025  | 6.784862  | 1.629696 | -0.001944 | 0.000489  | -0.001675 |
| Na | 0.404117  | 7.016739  | 4.737094 | -0.001947 | 0.000488  | -0.001670 |
| Na | 2.558546  | 13.685662 | 1.553699 | 0.001948  | 0.000489  | 0.001673  |
| Na | -0.105403 | 0.115939  | 4.813091 | 0.001946  | 0.000488  | 0.001675  |

|    |           |           |          |           |           |           |
|----|-----------|-----------|----------|-----------|-----------|-----------|
| B  | 4.155007  | 8.978944  | 1.168663 | -0.000081 | 0.013315  | 0.009587  |
| B  | -1.701865 | 4.822656  | 5.198127 | -0.000085 | 0.013353  | 0.009609  |
| B  | 0.452564  | 2.078144  | 2.014732 | 0.000089  | 0.013357  | -0.009609 |
| B  | 2.000578  | 11.723457 | 4.352058 | 0.000080  | 0.013334  | -0.009599 |
| B  | -2.733891 | 11.746082 | 5.839177 | -0.007601 | -0.015462 | 0.001693  |
| B  | 5.187034  | 2.055518  | 0.527613 | -0.007618 | -0.015473 | 0.001700  |
| B  | 3.032605  | 4.845282  | 3.711007 | 0.007614  | -0.015465 | -0.001702 |
| B  | -0.579463 | 8.956318  | 2.655782 | 0.007592  | -0.015439 | -0.001689 |
| B  | -0.983708 | 0.054306  | 1.827988 | -0.090544 | 0.014476  | -0.080595 |
| B  | 3.436850  | 13.747295 | 4.538802 | -0.090422 | 0.014473  | -0.080490 |
| B  | 5.591279  | 6.955106  | 1.355407 | 0.090300  | 0.014457  | 0.080382  |
| B  | -3.138137 | 6.846495  | 5.011383 | 0.090505  | 0.014484  | 0.080566  |
| Si | 0.631772  | 3.486686  | 4.508512 | -0.002390 | -0.001328 | 0.004367  |
| Si | 1.821370  | 10.314915 | 1.858278 | -0.002385 | -0.001332 | 0.004363  |
| Si | -0.333059 | 10.387486 | 5.041673 | 0.002389  | -0.001330 | -0.004360 |
| Si | 2.786201  | 3.414115  | 1.325117 | 0.002390  | -0.001327 | -0.004366 |
| O  | 0.061445  | 3.072947  | 3.041906 | 0.000077  | -0.004621 | -0.003504 |
| O  | 2.391697  | 10.728653 | 3.324884 | 0.000078  | -0.004611 | -0.003500 |
| O  | 4.546126  | 9.973747  | 0.141489 | -0.000079 | -0.004606 | 0.003496  |
| O  | -2.092984 | 3.827853  | 6.225301 | -0.000077 | -0.004618 | 0.003501  |
| O  | 2.197450  | 3.933608  | 4.519003 | 0.004722  | 0.005722  | -0.002962 |
| O  | 0.255692  | 9.867992  | 1.847787 | 0.004717  | 0.005713  | -0.002963 |
| O  | -1.898737 | 10.834409 | 5.031182 | -0.004723 | 0.005721  | 0.002965  |
| O  | 4.351879  | 2.967192  | 1.335608 | -0.004721 | 0.005724  | 0.002963  |
| O  | -0.212316 | 4.798696  | 5.055280 | 0.005218  | -0.002504 | -0.001934 |
| O  | 2.665458  | 9.002905  | 1.311510 | 0.005208  | -0.002488 | -0.001929 |
| O  | 0.511030  | 11.699496 | 4.494905 | -0.005214 | -0.002492 | 0.001931  |
| O  | 1.942113  | 2.102105  | 1.871885 | -0.005221 | -0.002505 | 0.001934  |
| O  | 0.525580  | 2.169271  | 5.472081 | -0.000222 | 0.006211  | -0.007906 |
| O  | 1.927562  | 11.632329 | 0.894709 | -0.000225 | 0.006205  | -0.007898 |
| O  | -0.226867 | 9.070071  | 4.078104 | 0.000225  | 0.006195  | 0.007888  |
| O  | 2.680009  | 4.731529  | 2.288686 | 0.000222  | 0.006210  | 0.007905  |
| O  | 0.058846  | 0.698526  | 2.444964 | 0.026564  | 0.012519  | 0.018000  |
| O  | 2.394296  | 13.103075 | 3.921826 | 0.026520  | 0.012498  | 0.017968  |
| O  | 4.548725  | 7.599326  | 0.738431 | -0.026483 | 0.012482  | -0.017945 |
| O  | -2.095583 | 6.202275  | 5.628359 | -0.026551 | 0.012508  | -0.017993 |



|   |           |           |          |           |           |           |
|---|-----------|-----------|----------|-----------|-----------|-----------|
| O | -2.459230 | 13.184059 | 5.445139 | 0.027492  | -0.015677 | 0.027690  |
| O | 4.912372  | 0.617542  | 0.921651 | 0.027534  | -0.015697 | 0.027731  |
| O | 2.757943  | 6.283259  | 4.105046 | -0.027522 | -0.015694 | -0.027720 |
| O | -0.304801 | 7.518342  | 2.261744 | -0.027457 | -0.015657 | -0.027654 |
| O | -0.175430 | 2.374756  | 0.744070 | 0.008082  | -0.000048 | 0.006157  |
| O | 2.628573  | 11.426844 | 5.622720 | 0.008077  | -0.000047 | 0.006156  |
| O | 4.783002  | 9.275557  | 2.439325 | -0.008067 | -0.000047 | -0.006148 |
| O | -2.329859 | 4.526044  | 3.927465 | -0.008079 | -0.000048 | -0.006156 |
| O | -1.223866 | 12.517207 | 2.155216 | 0.010211  | 0.001398  | 0.010470  |
| O | 3.677009  | 1.284394  | 4.211574 | 0.010196  | 0.001390  | 0.010457  |
| O | 5.831438  | 5.616407  | 1.028179 | -0.010182 | 0.001385  | -0.010444 |
| O | -3.378295 | 8.185194  | 5.338611 | -0.010206 | 0.001394  | -0.010466 |
| H | -0.637445 | 12.195109 | 2.878812 | -0.048300 | -0.152489 | -0.022383 |
| H | 3.090587  | 1.606491  | 3.487978 | -0.048222 | -0.152319 | -0.022372 |
| H | 5.245016  | 5.294309  | 0.304583 | 0.048144  | -0.152112 | 0.022350  |
| H | -2.791874 | 8.507292  | 6.062207 | 0.048289  | -0.152438 | 0.022370  |

8 f = 41.649065 THz 261.688792 2PiTHz 1389.263219 cm-1 172.246748

meV

|    | X         | Y         | Z        | dx        | dy        | dz        |
|----|-----------|-----------|----------|-----------|-----------|-----------|
| Li | 3.769818  | 9.645336  | 4.001386 | 0.000922  | -0.000481 | 0.000172  |
| Li | -1.316675 | 4.156264  | 2.365404 | 0.000922  | -0.000480 | 0.000173  |
| Li | -3.471104 | 2.744536  | 5.548798 | 0.000922  | 0.000481  | 0.000173  |
| Li | 5.924247  | 11.057064 | 0.817991 | 0.000923  | 0.000479  | 0.000175  |
| Na | 2.049025  | 6.784862  | 1.629696 | -0.001957 | 0.000068  | -0.001656 |
| Na | 0.404117  | 7.016739  | 4.737094 | -0.001956 | 0.000068  | -0.001659 |
| Na | 2.558546  | 13.685662 | 1.553699 | -0.001956 | -0.000068 | -0.001656 |
| Na | -0.105403 | 0.115939  | 4.813091 | -0.001954 | -0.000068 | -0.001656 |
| B  | 4.155007  | 8.978944  | 1.168663 | -0.001153 | 0.012917  | 0.006864  |
| B  | -1.701865 | 4.822656  | 5.198127 | -0.001156 | 0.012895  | 0.006848  |
| B  | 0.452564  | 2.078144  | 2.014732 | -0.001157 | -0.012894 | 0.006849  |
| B  | 2.000578  | 11.723457 | 4.352058 | -0.001153 | -0.012895 | 0.006846  |
| B  | -2.733891 | 11.746082 | 5.839177 | 0.008160  | 0.018730  | -0.001104 |
| B  | 5.187034  | 2.055518  | 0.527613 | 0.008163  | 0.018738  | -0.001108 |
| B  | 3.032605  | 4.845282  | 3.711007 | 0.008165  | -0.018736 | -0.001105 |
| B  | -0.579463 | 8.956318  | 2.655782 | 0.008172  | -0.018759 | -0.001110 |

|    |           |           |          |           |           |           |
|----|-----------|-----------|----------|-----------|-----------|-----------|
| B  | -0.983708 | 0.054306  | 1.827988 | 0.093036  | -0.004240 | 0.078999  |
| B  | 3.436850  | 13.747295 | 4.538802 | 0.093011  | -0.004240 | 0.078976  |
| B  | 5.591279  | 6.955106  | 1.355407 | 0.093164  | 0.004264  | 0.079115  |
| B  | -3.138137 | 6.846495  | 5.011383 | 0.093039  | 0.004243  | 0.079001  |
| Si | 0.631772  | 3.486686  | 4.508512 | -0.002197 | 0.001755  | -0.002133 |
| Si | 1.821370  | 10.314915 | 1.858278 | -0.002202 | 0.001755  | -0.002131 |
| Si | -0.333059 | 10.387486 | 5.041673 | -0.002197 | -0.001759 | -0.002138 |
| Si | 2.786201  | 3.414115  | 1.325117 | -0.002198 | -0.001753 | -0.002134 |
| O  | 0.061445  | 3.072947  | 3.041906 | 0.000453  | 0.005012  | 0.003809  |
| O  | 2.391697  | 10.728653 | 3.324884 | 0.000452  | 0.005010  | 0.003808  |
| O  | 4.546126  | 9.973747  | 0.141489 | 0.000453  | -0.005017 | 0.003813  |
| O  | -2.092984 | 3.827853  | 6.225301 | 0.000452  | -0.005014 | 0.003810  |
| O  | 2.197450  | 3.933608  | 4.519003 | 0.003244  | 0.005743  | -0.001853 |
| O  | 0.255692  | 9.867992  | 1.847787 | 0.003250  | 0.005752  | -0.001856 |
| O  | -1.898737 | 10.834409 | 5.031182 | 0.003241  | -0.005741 | -0.001851 |
| O  | 4.351879  | 2.967192  | 1.335608 | 0.003245  | -0.005744 | -0.001853 |
| O  | -0.212316 | 4.798696  | 5.055280 | 0.005279  | -0.002969 | -0.001101 |
| O  | 2.665458  | 9.002905  | 1.311510 | 0.005287  | -0.002976 | -0.001105 |
| O  | 0.511030  | 11.699496 | 4.494905 | 0.005279  | 0.002973  | -0.001102 |
| O  | 1.942113  | 2.102105  | 1.871885 | 0.005278  | 0.002968  | -0.001101 |
| O  | 0.525580  | 2.169271  | 5.472081 | 0.000507  | -0.006499 | 0.006667  |
| O  | 1.927562  | 11.632329 | 0.894709 | 0.000509  | -0.006495 | 0.006664  |
| O  | -0.226867 | 9.070071  | 4.078104 | 0.000509  | 0.006509  | 0.006679  |
| O  | 2.680009  | 4.731529  | 2.288686 | 0.000507  | 0.006497  | 0.006667  |
| O  | 0.058846  | 0.698526  | 2.444964 | -0.028534 | -0.015246 | -0.018455 |
| O  | 2.394296  | 13.103075 | 3.921826 | -0.028527 | -0.015238 | -0.018447 |
| O  | 4.548725  | 7.599326  | 0.738431 | -0.028573 | 0.015262  | -0.018479 |
| O  | -2.095583 | 6.202275  | 5.628359 | -0.028534 | 0.015243  | -0.018454 |
| O  | -2.459230 | 13.184059 | 5.445139 | -0.026954 | 0.013068  | -0.026503 |
| O  | 4.912372  | 0.617542  | 0.921651 | -0.026959 | 0.013071  | -0.026509 |
| O  | 2.757943  | 6.283259  | 4.105046 | -0.026960 | -0.013072 | -0.026509 |
| O  | -0.304801 | 7.518342  | 2.261744 | -0.027002 | -0.013094 | -0.026549 |
| O  | -0.175430 | 2.374756  | 0.744070 | -0.007698 | -0.000665 | -0.005431 |
| O  | 2.628573  | 11.426844 | 5.622720 | -0.007692 | -0.000663 | -0.005432 |
| O  | 4.783002  | 9.275557  | 2.439325 | -0.007706 | 0.000662  | -0.005441 |
| O  | -2.329859 | 4.526044  | 3.927465 | -0.007698 | 0.000664  | -0.005433 |

|   |           |           |          |           |           |           |
|---|-----------|-----------|----------|-----------|-----------|-----------|
| O | -1.223866 | 12.517207 | 2.155216 | -0.010772 | -0.004659 | -0.009631 |
| O | 3.677009  | 1.284394  | 4.211574 | -0.010772 | -0.004662 | -0.009630 |
| O | 5.831438  | 5.616407  | 1.028179 | -0.010786 | 0.004661  | -0.009647 |
| O | -3.378295 | 8.185194  | 5.338611 | -0.010775 | 0.004660  | -0.009632 |
| H | -0.637445 | 12.195109 | 2.878812 | 0.050344  | 0.148282  | 0.020636  |
| H | 3.090587  | 1.606491  | 3.487978 | 0.050335  | 0.148266  | 0.020638  |
| H | 5.245016  | 5.294309  | 0.304583 | 0.050420  | -0.148499 | 0.020662  |
| H | -2.791874 | 8.507292  | 6.062207 | 0.050343  | -0.148315 | 0.020652  |

9 f = 40.897808 THz 256.968503 2PiTHz 1364.203975 cm-1 169.139797 meV

|    | X         | Y         | Z        | dx        | dy        | dz        |
|----|-----------|-----------|----------|-----------|-----------|-----------|
| Li | 3.769818  | 9.645336  | 4.001386 | -0.000165 | 0.000275  | -0.001773 |
| Li | -1.316675 | 4.156264  | 2.365404 | -0.000165 | 0.000272  | -0.001773 |
| Li | -3.471104 | 2.744536  | 5.548798 | -0.000166 | -0.000274 | -0.001774 |
| Li | 5.924247  | 11.057064 | 0.817991 | -0.000165 | -0.000273 | -0.001772 |
| Na | 2.049025  | 6.784862  | 1.629696 | -0.000014 | -0.003450 | 0.000239  |
| Na | 0.404117  | 7.016739  | 4.737094 | -0.000015 | -0.003449 | 0.000239  |
| Na | 2.558546  | 13.685662 | 1.553699 | -0.000015 | 0.003450  | 0.000240  |
| Na | -0.105403 | 0.115939  | 4.813091 | -0.000014 | 0.003450  | 0.000238  |
| B  | 4.155007  | 8.978944  | 1.168663 | -0.004794 | -0.008727 | -0.007581 |
| B  | -1.701865 | 4.822656  | 5.198127 | -0.004786 | -0.008742 | -0.007585 |
| B  | 0.452564  | 2.078144  | 2.014732 | -0.004789 | 0.008733  | -0.007585 |
| B  | 2.000578  | 11.723457 | 4.352058 | -0.004792 | 0.008735  | -0.007582 |
| B  | -2.733891 | 11.746082 | 5.839177 | 0.008611  | 0.009168  | 0.004620  |
| B  | 5.187034  | 2.055518  | 0.527613 | 0.008620  | 0.009175  | 0.004621  |
| B  | 3.032605  | 4.845282  | 3.711007 | 0.008615  | -0.009170 | 0.004619  |
| B  | -0.579463 | 8.956318  | 2.655782 | 0.008615  | -0.009174 | 0.004622  |
| B  | -0.983708 | 0.054306  | 1.827988 | 0.022914  | 0.123205  | -0.026106 |
| B  | 3.436850  | 13.747295 | 4.538802 | 0.022908  | 0.123219  | -0.026111 |
| B  | 5.591279  | 6.955106  | 1.355407 | 0.022924  | -0.123192 | -0.026089 |
| B  | -3.138137 | 6.846495  | 5.011383 | 0.022896  | -0.123225 | -0.026127 |
| Si | 0.631772  | 3.486686  | 4.508512 | 0.000682  | 0.000207  | -0.000815 |
| Si | 1.821370  | 10.314915 | 1.858278 | 0.000682  | 0.000206  | -0.000814 |
| Si | -0.333059 | 10.387486 | 5.041673 | 0.000684  | -0.000207 | -0.000815 |
| Si | 2.786201  | 3.414115  | 1.325117 | 0.000680  | -0.000207 | -0.000814 |

|   |           |           |          |           |           |           |
|---|-----------|-----------|----------|-----------|-----------|-----------|
| O | 0.061445  | 3.072947  | 3.041906 | 0.000986  | 0.000456  | 0.001992  |
| O | 2.391697  | 10.728653 | 3.324884 | 0.000983  | 0.000449  | 0.001989  |
| O | 4.546126  | 9.973747  | 0.141489 | 0.000982  | -0.000457 | 0.001989  |
| O | -2.092984 | 3.827853  | 6.225301 | 0.000988  | -0.000447 | 0.001992  |
| O | 2.197450  | 3.933608  | 4.519003 | -0.001962 | 0.000512  | -0.000583 |
| O | 0.255692  | 9.867992  | 1.847787 | -0.001969 | 0.000518  | -0.000586 |
| O | -1.898737 | 10.834409 | 5.031182 | -0.001973 | -0.000516 | -0.000591 |
| O | 4.351879  | 2.967192  | 1.335608 | -0.001958 | -0.000514 | -0.000577 |
| O | -0.212316 | 4.798696  | 5.055280 | 0.001419  | 0.000830  | -0.000508 |
| O | 2.665458  | 9.002905  | 1.311510 | 0.001416  | 0.000825  | -0.000507 |
| O | 0.511030  | 11.699496 | 4.494905 | 0.001419  | -0.000824 | -0.000509 |
| O | 1.942113  | 2.102105  | 1.871885 | 0.001415  | -0.000830 | -0.000506 |
| O | 0.525580  | 2.169271  | 5.472081 | -0.001220 | -0.001496 | -0.001545 |
| O | 1.927562  | 11.632329 | 0.894709 | -0.001214 | -0.001478 | -0.001543 |
| O | -0.226867 | 9.070071  | 4.078104 | -0.001217 | 0.001486  | -0.001541 |
| O | 2.680009  | 4.731529  | 2.288686 | -0.001217 | 0.001488  | -0.001547 |
| O | 0.058846  | 0.698526  | 2.444964 | -0.021737 | -0.029573 | -0.006460 |
| O | 2.394296  | 13.103075 | 3.921826 | -0.021744 | -0.029579 | -0.006467 |
| O | 4.548725  | 7.599326  | 0.738431 | -0.021729 | 0.029574  | -0.006456 |
| O | -2.095583 | 6.202275  | 5.628359 | -0.021751 | 0.029577  | -0.006470 |
| O | -2.459230 | 13.184059 | 5.445139 | 0.009617  | -0.024603 | 0.015899  |
| O | 4.912372  | 0.617542  | 0.921651 | 0.009607  | -0.024585 | 0.015896  |
| O | 2.757943  | 6.283259  | 4.105046 | 0.009629  | 0.024598  | 0.015913  |
| O | -0.304801 | 7.518342  | 2.261744 | 0.009595  | 0.024589  | 0.015881  |
| O | -0.175430 | 2.374756  | 0.744070 | -0.001159 | -0.002291 | 0.001025  |
| O | 2.628573  | 11.426844 | 5.622720 | -0.001146 | -0.002288 | 0.001011  |
| O | 4.783002  | 9.275557  | 2.439325 | -0.001147 | 0.002285  | 0.001019  |
| O | -2.329859 | 4.526044  | 3.927465 | -0.001159 | 0.002293  | 0.001018  |
| O | -1.223866 | 12.517207 | 2.155216 | -0.005366 | -0.042034 | 0.010782  |
| O | 3.677009  | 1.284394  | 4.211574 | -0.005368 | -0.042033 | 0.010784  |
| O | 5.831438  | 5.616407  | 1.028179 | -0.005367 | 0.042029  | 0.010778  |
| O | -3.378295 | 8.185194  | 5.338611 | -0.005364 | 0.042035  | 0.010787  |
| H | -0.637445 | 12.195109 | 2.878812 | 0.004398  | -0.014391 | 0.014436  |
| H | 3.090587  | 1.606491  | 3.487978 | 0.004382  | -0.014411 | 0.014435  |
| H | 5.245016  | 5.294309  | 0.304583 | 0.004402  | 0.014353  | 0.014442  |
| H | -2.791874 | 8.507292  | 6.062207 | 0.004363  | 0.014451  | 0.014437  |

10 f = 39.585589 THz 248.723592 2PiTHz 1320.433080 cm-1 163.712896  
meV

|    | X         | Y         | Z        | dx        | dy        | dz        |
|----|-----------|-----------|----------|-----------|-----------|-----------|
| Li | 3.769818  | 9.645336  | 4.001386 | -0.001108 | 0.007968  | -0.000577 |
| Li | -1.316675 | 4.156264  | 2.365404 | -0.001110 | 0.007969  | -0.000578 |
| Li | -3.471104 | 2.744536  | 5.548798 | 0.001110  | 0.007967  | 0.000576  |
| Li | 5.924247  | 11.057064 | 0.817991 | 0.001107  | 0.007970  | 0.000580  |
| Na | 2.049025  | 6.784862  | 1.629696 | -0.000272 | -0.001748 | 0.000124  |
| Na | 0.404117  | 7.016739  | 4.737094 | -0.000272 | -0.001747 | 0.000127  |
| Na | 2.558546  | 13.685662 | 1.553699 | 0.000273  | -0.001747 | -0.000127 |
| Na | -0.105403 | 0.115939  | 4.813091 | 0.000271  | -0.001747 | -0.000124 |
| B  | 4.155007  | 8.978944  | 1.168663 | -0.005957 | 0.010418  | -0.007339 |
| B  | -1.701865 | 4.822656  | 5.198127 | -0.005958 | 0.010417  | -0.007335 |
| B  | 0.452564  | 2.078144  | 2.014732 | 0.005964  | 0.010424  | 0.007336  |
| B  | 2.000578  | 11.723457 | 4.352058 | 0.005951  | 0.010411  | 0.007337  |
| B  | -2.733891 | 11.746082 | 5.839177 | -0.013049 | 0.006338  | -0.006827 |
| B  | 5.187034  | 2.055518  | 0.527613 | -0.013061 | 0.006341  | -0.006834 |
| B  | 3.032605  | 4.845282  | 3.711007 | 0.013056  | 0.006336  | 0.006829  |
| B  | -0.579463 | 8.956318  | 2.655782 | 0.013055  | 0.006343  | 0.006832  |
| B  | -0.983708 | 0.054306  | 1.827988 | -0.035098 | -0.121889 | 0.017013  |
| B  | 3.436850  | 13.747295 | 4.538802 | -0.035040 | -0.121783 | 0.017015  |
| B  | 5.591279  | 6.955106  | 1.355407 | 0.035059  | -0.121847 | -0.017027 |
| B  | -3.138137 | 6.846495  | 5.011383 | 0.035083  | -0.121831 | -0.017001 |
| Si | 0.631772  | 3.486686  | 4.508512 | 0.000363  | 0.006314  | 0.002130  |
| Si | 1.821370  | 10.314915 | 1.858278 | 0.000361  | 0.006312  | 0.002127  |
| Si | -0.333059 | 10.387486 | 5.041673 | -0.000362 | 0.006312  | -0.002128 |
| Si | 2.786201  | 3.414115  | 1.325117 | -0.000363 | 0.006313  | -0.002129 |
| O  | 0.061445  | 3.072947  | 3.041906 | 0.000053  | -0.008370 | -0.007849 |
| O  | 2.391697  | 10.728653 | 3.324884 | 0.000057  | -0.008368 | -0.007842 |
| O  | 4.546126  | 9.973747  | 0.141489 | -0.000056 | -0.008371 | 0.007845  |
| O  | -2.092984 | 3.827853  | 6.225301 | -0.000053 | -0.008368 | 0.007847  |
| O  | 2.197450  | 3.933608  | 4.519003 | -0.004392 | -0.005767 | 0.001243  |
| O  | 0.255692  | 9.867992  | 1.847787 | -0.004395 | -0.005770 | 0.001246  |
| O  | -1.898737 | 10.834409 | 5.031182 | 0.004393  | -0.005769 | -0.001246 |
| O  | 4.351879  | 2.967192  | 1.335608 | 0.004394  | -0.005768 | -0.001243 |

|   |           |           |          |           |           |           |
|---|-----------|-----------|----------|-----------|-----------|-----------|
| O | -0.212316 | 4.798696  | 5.055280 | 0.005737  | -0.006358 | -0.002522 |
| O | 2.665458  | 9.002905  | 1.311510 | 0.005739  | -0.006358 | -0.002519 |
| O | 0.511030  | 11.699496 | 4.494905 | -0.005735 | -0.006356 | 0.002519  |
| O | 1.942113  | 2.102105  | 1.871885 | -0.005741 | -0.006360 | 0.002522  |
| O | 0.525580  | 2.169271  | 5.472081 | 0.001513  | -0.004684 | 0.005025  |
| O | 1.927562  | 11.632329 | 0.894709 | 0.001513  | -0.004681 | 0.005021  |
| O | -0.226867 | 9.070071  | 4.078104 | -0.001512 | -0.004684 | -0.005023 |
| O | 2.680009  | 4.731529  | 2.288686 | -0.001513 | -0.004681 | -0.005023 |
| O | 0.058846  | 0.698526  | 2.444964 | 0.025049  | 0.027319  | 0.009280  |
| O | 2.394296  | 13.103075 | 3.921826 | 0.025013  | 0.027289  | 0.009261  |
| O | 4.548725  | 7.599326  | 0.738431 | -0.025024 | 0.027304  | -0.009263 |
| O | -2.095583 | 6.202275  | 5.628359 | -0.025042 | 0.027307  | -0.009280 |
| O | -2.459230 | 13.184059 | 5.445139 | -0.005285 | 0.016555  | -0.010271 |
| O | 4.912372  | 0.617542  | 0.921651 | -0.005287 | 0.016564  | -0.010277 |
| O | 2.757943  | 6.283259  | 4.105046 | 0.005285  | 0.016556  | 0.010271  |
| O | -0.304801 | 7.518342  | 2.261744 | 0.005288  | 0.016563  | 0.010277  |
| O | -0.175430 | 2.374756  | 0.744070 | 0.002023  | -0.002991 | 0.001947  |
| O | 2.628573  | 11.426844 | 5.622720 | 0.002022  | -0.002992 | 0.001941  |
| O | 4.783002  | 9.275557  | 2.439325 | -0.002022 | -0.002995 | -0.001946 |
| O | -2.329859 | 4.526044  | 3.927465 | -0.002023 | -0.002987 | -0.001943 |
| O | -1.223866 | 12.517207 | 2.155216 | 0.004512  | 0.039855  | -0.012354 |
| O | 3.677009  | 1.284394  | 4.211574 | 0.004513  | 0.039830  | -0.012341 |
| O | 5.831438  | 5.616407  | 1.028179 | -0.004515 | 0.039851  | 0.012347  |
| O | -3.378295 | 8.185194  | 5.338611 | -0.004509 | 0.039836  | 0.012348  |
| H | -0.637445 | 12.195109 | 2.878812 | 0.007949  | 0.054675  | -0.004293 |
| H | 3.090587  | 1.606491  | 3.487978 | 0.007935  | 0.054616  | -0.004282 |
| H | 5.245016  | 5.294309  | 0.304583 | -0.007944 | 0.054641  | 0.004290  |
| H | -2.791874 | 8.507292  | 6.062207 | -0.007949 | 0.054666  | 0.004286  |

11 f = 39.328217 THz 247.106475 2PiTHz 1311.848070 cm-1 162.648490 meV

|    | X         | Y         | Z        | dx        | dy        | dz        |
|----|-----------|-----------|----------|-----------|-----------|-----------|
| Li | 3.769818  | 9.645336  | 4.001386 | 0.002783  | 0.001029  | -0.007081 |
| Li | -1.316675 | 4.156264  | 2.365404 | -0.002784 | -0.001035 | 0.007081  |
| Li | -3.471104 | 2.744536  | 5.548798 | 0.002784  | -0.001034 | -0.007083 |
| Li | 5.924247  | 11.057064 | 0.817991 | -0.002783 | 0.001031  | 0.007081  |

|    |           |           |          |           |           |           |
|----|-----------|-----------|----------|-----------|-----------|-----------|
| Na | 2.049025  | 6.784862  | 1.629696 | 0.000849  | 0.000035  | 0.000498  |
| Na | 0.404117  | 7.016739  | 4.737094 | -0.000849 | -0.000034 | -0.000501 |
| Na | 2.558546  | 13.685662 | 1.553699 | 0.000850  | -0.000034 | 0.000501  |
| Na | -0.105403 | 0.115939  | 4.813091 | -0.000849 | 0.000035  | -0.000498 |
| B  | 4.155007  | 8.978944  | 1.168663 | 0.012843  | -0.011692 | 0.007966  |
| B  | -1.701865 | 4.822656  | 5.198127 | -0.012845 | 0.011683  | -0.007968 |
| B  | 0.452564  | 2.078144  | 2.014732 | 0.012847  | 0.011686  | 0.007967  |
| B  | 2.000578  | 11.723457 | 4.352058 | -0.012844 | -0.011694 | -0.007967 |
| B  | -2.733891 | 11.746082 | 5.839177 | 0.012212  | -0.008920 | 0.011141  |
| B  | 5.187034  | 2.055518  | 0.527613 | -0.012213 | 0.008915  | -0.011144 |
| B  | 3.032605  | 4.845282  | 3.711007 | 0.012211  | 0.008915  | 0.011141  |
| B  | -0.579463 | 8.956318  | 2.655782 | -0.012212 | -0.008917 | -0.011142 |
| B  | -0.983708 | 0.054306  | 1.827988 | -0.030243 | -0.121228 | 0.026496  |
| B  | 3.436850  | 13.747295 | 4.538802 | 0.030247  | 0.121249  | -0.026503 |
| B  | 5.591279  | 6.955106  | 1.355407 | -0.030254 | 0.121255  | 0.026497  |
| B  | -3.138137 | 6.846495  | 5.011383 | 0.030229  | -0.121185 | -0.026494 |
| Si | 0.631772  | 3.486686  | 4.508512 | 0.002724  | 0.004418  | 0.001464  |
| Si | 1.821370  | 10.314915 | 1.858278 | -0.002722 | -0.004423 | -0.001464 |
| Si | -0.333059 | 10.387486 | 5.041673 | 0.002723  | -0.004423 | 0.001465  |
| Si | 2.786201  | 3.414115  | 1.325117 | -0.002723 | 0.004418  | -0.001464 |
| O  | 0.061445  | 3.072947  | 3.041906 | -0.001245 | -0.006241 | -0.008574 |
| O  | 2.391697  | 10.728653 | 3.324884 | 0.001247  | 0.006247  | 0.008575  |
| O  | 4.546126  | 9.973747  | 0.141489 | -0.001250 | 0.006247  | -0.008576 |
| O  | -2.092984 | 3.827853  | 6.225301 | 0.001242  | -0.006240 | 0.008572  |
| O  | 2.197450  | 3.933608  | 4.519003 | -0.007727 | -0.004190 | 0.002030  |
| O  | 0.255692  | 9.867992  | 1.847787 | 0.007729  | 0.004191  | -0.002030 |
| O  | -1.898737 | 10.834409 | 5.031182 | -0.007727 | 0.004193  | 0.002033  |
| O  | 4.351879  | 2.967192  | 1.335608 | 0.007729  | -0.004189 | -0.002027 |
| O  | -0.212316 | 4.798696  | 5.055280 | 0.007553  | -0.004240 | 0.000106  |
| O  | 2.665458  | 9.002905  | 1.311510 | -0.007557 | 0.004253  | -0.000104 |
| O  | 0.511030  | 11.699496 | 4.494905 | 0.007559  | 0.004252  | 0.000104  |
| O  | 1.942113  | 2.102105  | 1.871885 | -0.007553 | -0.004243 | -0.000106 |
| O  | 0.525580  | 2.169271  | 5.472081 | 0.001114  | -0.005213 | 0.007558  |
| O  | 1.927562  | 11.632329 | 0.894709 | -0.001114 | 0.005206  | -0.007557 |
| O  | -0.226867 | 9.070071  | 4.078104 | 0.001112  | 0.005210  | 0.007554  |
| O  | 2.680009  | 4.731529  | 2.288686 | -0.001116 | -0.005208 | -0.007559 |

|   |           |           |          |           |           |           |
|---|-----------|-----------|----------|-----------|-----------|-----------|
| O | 0.058846  | 0.698526  | 2.444964 | 0.022705  | 0.023359  | 0.007402  |
| O | 2.394296  | 13.103075 | 3.921826 | -0.022702 | -0.023366 | -0.007397 |
| O | 4.548725  | 7.599326  | 0.738431 | 0.022714  | -0.023369 | 0.007409  |
| O | -2.095583 | 6.202275  | 5.628359 | -0.022688 | 0.023350  | -0.007389 |
| O | -2.459230 | 13.184059 | 5.445139 | 0.007178  | -0.016852 | 0.013742  |
| O | 4.912372  | 0.617542  | 0.921651 | -0.007185 | 0.016851  | -0.013746 |
| O | 2.757943  | 6.283259  | 4.105046 | 0.007171  | 0.016844  | 0.013735  |
| O | -0.304801 | 7.518342  | 2.261744 | -0.007191 | -0.016853 | -0.013748 |
| O | -0.175430 | 2.374756  | 0.744070 | -0.001159 | -0.002427 | 0.003168  |
| O | 2.628573  | 11.426844 | 5.622720 | 0.001158  | 0.002432  | -0.003170 |
| O | 4.783002  | 9.275557  | 2.439325 | -0.001157 | 0.002429  | 0.003170  |
| O | -2.329859 | 4.526044  | 3.927465 | 0.001160  | -0.002429 | -0.003167 |
| O | -1.223866 | 12.517207 | 2.155216 | 0.004690  | 0.041740  | -0.013138 |
| O | 3.677009  | 1.284394  | 4.211574 | -0.004682 | -0.041746 | 0.013142  |
| O | 5.831438  | 5.616407  | 1.028179 | 0.004685  | -0.041745 | -0.013142 |
| O | -3.378295 | 8.185194  | 5.338611 | -0.004684 | 0.041727  | 0.013133  |
| H | -0.637445 | 12.195109 | 2.878812 | 0.007050  | 0.035003  | -0.011828 |
| H | 3.090587  | 1.606491  | 3.487978 | -0.007060 | -0.035053 | 0.011820  |
| H | 5.245016  | 5.294309  | 0.304583 | 0.007071  | -0.035056 | -0.011826 |
| H | -2.791874 | 8.507292  | 6.062207 | -0.007046 | 0.035003  | 0.011820  |

12 f = 39.143158 THz 245.943716 2PiTHz 1305.675174 cm-1 161.883148 meV

|    | X         | Y         | Z        | dx        | dy        | dz        |
|----|-----------|-----------|----------|-----------|-----------|-----------|
| Li | 3.769818  | 9.645336  | 4.001386 | 0.000870  | 0.004062  | -0.004458 |
| Li | -1.316675 | 4.156264  | 2.365404 | -0.000870 | -0.004059 | 0.004459  |
| Li | -3.471104 | 2.744536  | 5.548798 | -0.000869 | 0.004062  | 0.004458  |
| Li | 5.924247  | 11.057064 | 0.817991 | 0.000870  | -0.004058 | -0.004457 |
| Na | 2.049025  | 6.784862  | 1.629696 | 0.000871  | -0.000055 | 0.000510  |
| Na | 0.404117  | 7.016739  | 4.737094 | -0.000871 | 0.000054  | -0.000512 |
| Na | 2.558546  | 13.685662 | 1.553699 | -0.000871 | -0.000055 | -0.000512 |
| Na | -0.105403 | 0.115939  | 4.813091 | 0.000871  | 0.000054  | 0.000510  |
| B  | 4.155007  | 8.978944  | 1.168663 | 0.011217  | -0.012495 | 0.004417  |
| B  | -1.701865 | 4.822656  | 5.198127 | -0.011219 | 0.012503  | -0.004414 |
| B  | 0.452564  | 2.078144  | 2.014732 | -0.011215 | -0.012493 | -0.004413 |
| B  | 2.000578  | 11.723457 | 4.352058 | 0.011217  | 0.012502  | 0.004416  |



|    |           |           |          |           |           |           |
|----|-----------|-----------|----------|-----------|-----------|-----------|
| B  | -2.733891 | 11.746082 | 5.839177 | -0.010387 | 0.010755  | -0.008863 |
| B  | 5.187034  | 2.055518  | 0.527613 | 0.010381  | -0.010752 | 0.008858  |
| B  | 3.032605  | 4.845282  | 3.711007 | 0.010387  | 0.010757  | 0.008865  |
| B  | -0.579463 | 8.956318  | 2.655782 | -0.010385 | -0.010753 | -0.008859 |
| B  | -0.983708 | 0.054306  | 1.827988 | 0.031763  | 0.122411  | -0.025590 |
| B  | 3.436850  | 13.747295 | 4.538802 | -0.031795 | -0.122480 | 0.025590  |
| B  | 5.591279  | 6.955106  | 1.355407 | -0.031775 | 0.122438  | 0.025591  |
| B  | -3.138137 | 6.846495  | 5.011383 | 0.031794  | -0.122488 | -0.025595 |
| Si | 0.631772  | 3.486686  | 4.508512 | -0.000497 | -0.000203 | -0.000542 |
| Si | 1.821370  | 10.314915 | 1.858278 | 0.000498  | 0.000206  | 0.000544  |
| Si | -0.333059 | 10.387486 | 5.041673 | 0.000498  | -0.000203 | 0.000543  |
| Si | 2.786201  | 3.414115  | 1.325117 | -0.000498 | 0.000206  | -0.000543 |
| O  | 0.061445  | 3.072947  | 3.041906 | 0.000456  | 0.005466  | 0.004792  |
| O  | 2.391697  | 10.728653 | 3.324884 | -0.000460 | -0.005469 | -0.004802 |
| O  | 4.546126  | 9.973747  | 0.141489 | -0.000461 | 0.005467  | -0.004800 |
| O  | -2.092984 | 3.827853  | 6.225301 | 0.000456  | -0.005471 | 0.004796  |
| O  | 2.197450  | 3.933608  | 4.519003 | -0.003490 | -0.004320 | 0.001454  |
| O  | 0.255692  | 9.867992  | 1.847787 | 0.003490  | 0.004317  | -0.001453 |
| O  | -1.898737 | 10.834409 | 5.031182 | 0.003490  | -0.004319 | -0.001454 |
| O  | 4.351879  | 2.967192  | 1.335608 | -0.003487 | 0.004317  | 0.001453  |
| O  | -0.212316 | 4.798696  | 5.055280 | 0.006777  | -0.003373 | 0.000029  |
| O  | 2.665458  | 9.002905  | 1.311510 | -0.006774 | 0.003371  | -0.000031 |
| O  | 0.511030  | 11.699496 | 4.494905 | -0.006775 | -0.003372 | -0.000029 |
| O  | 1.942113  | 2.102105  | 1.871885 | 0.006774  | 0.003370  | 0.000031  |
| O  | 0.525580  | 2.169271  | 5.472081 | -0.000637 | 0.003735  | -0.005103 |
| O  | 1.927562  | 11.632329 | 0.894709 | 0.000634  | -0.003742 | 0.005104  |
| O  | -0.226867 | 9.070071  | 4.078104 | 0.000635  | 0.003740  | 0.005103  |
| O  | 2.680009  | 4.731529  | 2.288686 | -0.000636 | -0.003739 | -0.005106 |
| O  | 0.058846  | 0.698526  | 2.444964 | -0.023678 | -0.023650 | -0.008292 |
| O  | 2.394296  | 13.103075 | 3.921826 | 0.023698  | 0.023667  | 0.008299  |
| O  | 4.548725  | 7.599326  | 0.738431 | 0.023688  | -0.023657 | 0.008296  |
| O  | -2.095583 | 6.202275  | 5.628359 | -0.023696 | 0.023667  | -0.008298 |
| O  | -2.459230 | 13.184059 | 5.445139 | -0.007009 | 0.015751  | -0.013245 |
| O  | 4.912372  | 0.617542  | 0.921651 | 0.007009  | -0.015741 | 0.013239  |
| O  | 2.757943  | 6.283259  | 4.105046 | 0.007008  | 0.015753  | 0.013244  |
| O  | -0.304801 | 7.518342  | 2.261744 | -0.007012 | -0.015744 | -0.013243 |

|   |           |           |          |           |           |           |
|---|-----------|-----------|----------|-----------|-----------|-----------|
| O | -0.175430 | 2.374756  | 0.744070 | 0.000325  | 0.003722  | -0.003346 |
| O | 2.628573  | 11.426844 | 5.622720 | -0.000328 | -0.003727 | 0.003354  |
| O | 4.783002  | 9.275557  | 2.439325 | -0.000323 | 0.003720  | 0.003347  |
| O | -2.329859 | 4.526044  | 3.927465 | 0.000330  | -0.003729 | -0.003354 |
| O | -1.223866 | 12.517207 | 2.155216 | -0.004257 | -0.041051 | 0.013664  |
| O | 3.677009  | 1.284394  | 4.211574 | 0.004262  | 0.041074  | -0.013665 |
| O | 5.831438  | 5.616407  | 1.028179 | 0.004259  | -0.041061 | -0.013662 |
| O | -3.378295 | 8.185194  | 5.338611 | -0.004260 | 0.041076  | 0.013670  |
| H | -0.637445 | 12.195109 | 2.878812 | -0.010050 | -0.052032 | 0.007175  |
| H | 3.090587  | 1.606491  | 3.487978 | 0.010050  | 0.052053  | -0.007174 |
| H | 5.245016  | 5.294309  | 0.304583 | 0.010054  | -0.052041 | -0.007175 |
| H | -2.791874 | 8.507292  | 6.062207 | -0.010058 | 0.052074  | 0.007175  |

13 f = 35.099473 THz 220.536495 2PiTHz 1170.792371 cm-1 145.159806 meV

|    | X         | Y         | Z        | dx        | dy        | dz        |
|----|-----------|-----------|----------|-----------|-----------|-----------|
| Li | 3.769818  | 9.645336  | 4.001386 | -0.000582 | -0.011428 | -0.010902 |
| Li | -1.316675 | 4.156264  | 2.365404 | 0.000584  | 0.011427  | 0.010903  |
| Li | -3.471104 | 2.744536  | 5.548798 | -0.000586 | 0.011432  | -0.010910 |
| Li | 5.924247  | 11.057064 | 0.817991 | 0.000580  | -0.011424 | 0.010894  |
| Na | 2.049025  | 6.784862  | 1.629696 | -0.000694 | 0.001193  | -0.000641 |
| Na | 0.404117  | 7.016739  | 4.737094 | 0.000695  | -0.001194 | 0.000637  |
| Na | 2.558546  | 13.685662 | 1.553699 | -0.000693 | -0.001193 | -0.000638 |
| Na | -0.105403 | 0.115939  | 4.813091 | 0.000697  | 0.001194  | 0.000640  |
| B  | 4.155007  | 8.978944  | 1.168663 | 0.011929  | -0.026409 | 0.026184  |
| B  | -1.701865 | 4.822656  | 5.198127 | -0.011913 | 0.026398  | -0.026226 |
| B  | 0.452564  | 2.078144  | 2.014732 | 0.011893  | 0.026408  | 0.026194  |
| B  | 2.000578  | 11.723457 | 4.352058 | -0.011946 | -0.026400 | -0.026211 |
| B  | -2.733891 | 11.746082 | 5.839177 | 0.011231  | -0.021440 | 0.008653  |
| B  | 5.187034  | 2.055518  | 0.527613 | -0.011241 | 0.021434  | -0.008694 |
| B  | 3.032605  | 4.845282  | 3.711007 | 0.011253  | 0.021425  | 0.008695  |
| B  | -0.579463 | 8.956318  | 2.655782 | -0.011227 | -0.021447 | -0.008655 |
| B  | -0.983708 | 0.054306  | 1.827988 | 0.021705  | 0.009213  | 0.010718  |
| B  | 3.436850  | 13.747295 | 4.538802 | -0.021738 | -0.009222 | -0.010748 |
| B  | 5.591279  | 6.955106  | 1.355407 | 0.021713  | -0.009230 | 0.010719  |
| B  | -3.138137 | 6.846495  | 5.011383 | -0.021726 | 0.009200  | -0.010746 |

|    |           |           |          |           |           |           |
|----|-----------|-----------|----------|-----------|-----------|-----------|
| Si | 0.631772  | 3.486686  | 4.508512 | 0.007424  | 0.018957  | -0.005028 |
| Si | 1.821370  | 10.314915 | 1.858278 | -0.007418 | -0.018964 | 0.005047  |
| Si | -0.333059 | 10.387486 | 5.041673 | 0.007429  | -0.018957 | -0.005040 |
| Si | 2.786201  | 3.414115  | 1.325117 | -0.007412 | 0.018963  | 0.005035  |
| O  | 0.061445  | 3.072947  | 3.041906 | -0.000371 | -0.012014 | -0.015823 |
| O  | 2.391697  | 10.728653 | 3.324884 | 0.000383  | 0.011992  | 0.015780  |
| O  | 4.546126  | 9.973747  | 0.141489 | -0.000383 | 0.011998  | -0.015789 |
| O  | -2.092984 | 3.827853  | 6.225301 | 0.000371  | -0.012008 | 0.015815  |
| O  | 2.197450  | 3.933608  | 4.519003 | -0.022716 | -0.016560 | 0.010121  |
| O  | 0.255692  | 9.867992  | 1.847787 | 0.022731  | 0.016570  | -0.010133 |
| O  | -1.898737 | 10.834409 | 5.031182 | -0.022735 | 0.016574  | 0.010138  |
| O  | 4.351879  | 2.967192  | 1.335608 | 0.022708  | -0.016555 | -0.010118 |
| O  | -0.212316 | 4.798696  | 5.055280 | 0.005342  | -0.011642 | 0.000519  |
| O  | 2.665458  | 9.002905  | 1.311510 | -0.005353 | 0.011669  | -0.000512 |
| O  | 0.511030  | 11.699496 | 4.494905 | 0.005339  | 0.011647  | 0.000521  |
| O  | 1.942113  | 2.102105  | 1.871885 | -0.005354 | -0.011665 | -0.000509 |
| O  | 0.525580  | 2.169271  | 5.472081 | 0.002699  | -0.020881 | 0.025657  |
| O  | 1.927562  | 11.632329 | 0.894709 | -0.002698 | 0.020894  | -0.025661 |
| O  | -0.226867 | 9.070071  | 4.078104 | 0.002695  | 0.020888  | 0.025648  |
| O  | 2.680009  | 4.731529  | 2.288686 | -0.002703 | -0.020887 | -0.025670 |
| O  | 0.058846  | 0.698526  | 2.444964 | -0.021527 | -0.022876 | -0.009465 |
| O  | 2.394296  | 13.103075 | 3.921826 | 0.021592  | 0.022927  | 0.009488  |
| O  | 4.548725  | 7.599326  | 0.738431 | -0.021544 | 0.022898  | -0.009459 |
| O  | -2.095583 | 6.202275  | 5.628359 | 0.021571  | -0.022901 | 0.009493  |
| O  | -2.459230 | 13.184059 | 5.445139 | 0.006100  | -0.007912 | 0.008979  |
| O  | 4.912372  | 0.617542  | 0.921651 | -0.006103 | 0.007901  | -0.008963 |
| O  | 2.757943  | 6.283259  | 4.105046 | 0.006088  | 0.007919  | 0.008967  |
| O  | -0.304801 | 7.518342  | 2.261744 | -0.006115 | -0.007895 | -0.008974 |
| O  | -0.175430 | 2.374756  | 0.744070 | -0.009767 | -0.003861 | -0.005986 |
| O  | 2.628573  | 11.426844 | 5.622720 | 0.009805  | 0.003857  | 0.006036  |
| O  | 4.783002  | 9.275557  | 2.439325 | -0.009790 | 0.003858  | -0.006014 |
| O  | -2.329859 | 4.526044  | 3.927465 | 0.009779  | -0.003859 | 0.006009  |
| O  | -1.223866 | 12.517207 | 2.155216 | 0.015936  | 0.019555  | 0.013229  |
| O  | 3.677009  | 1.284394  | 4.211574 | -0.015991 | -0.019626 | -0.013242 |
| O  | 5.831438  | 5.616407  | 1.028179 | 0.015960  | -0.019581 | 0.013225  |
| O  | -3.378295 | 8.185194  | 5.338611 | -0.015965 | 0.019592  | -0.013245 |

|   |           |           |          |           |           |           |
|---|-----------|-----------|----------|-----------|-----------|-----------|
| H | -0.637445 | 12.195109 | 2.878812 | -0.092142 | -0.338382 | -0.073072 |
| H | 3.090587  | 1.606491  | 3.487978 | 0.092337  | 0.338991  | 0.073176  |
| H | 5.245016  | 5.294309  | 0.304583 | -0.092182 | 0.338599  | -0.073141 |
| H | -2.791874 | 8.507292  | 6.062207 | 0.092276  | -0.338732 | 0.073105  |

14 f = 34.680221 THz 217.902256 2PiTHz 1156.807621 cm-1 143.425917 meV

|    | X         | Y         | Z        | dx        | dy        | dz        |
|----|-----------|-----------|----------|-----------|-----------|-----------|
| Li | 3.769818  | 9.645336  | 4.001386 | 0.006098  | 0.004232  | 0.008042  |
| Li | -1.316675 | 4.156264  | 2.365404 | 0.006097  | 0.004235  | 0.008050  |
| Li | -3.471104 | 2.744536  | 5.548798 | 0.006095  | -0.004229 | 0.008038  |
| Li | 5.924247  | 11.057064 | 0.817991 | 0.006099  | -0.004240 | 0.008056  |
| Na | 2.049025  | 6.784862  | 1.629696 | -0.000311 | 0.000022  | 0.000970  |
| Na | 0.404117  | 7.016739  | 4.737094 | -0.000309 | 0.000022  | 0.000971  |
| Na | 2.558546  | 13.685662 | 1.553699 | -0.000310 | -0.000022 | 0.000970  |
| Na | -0.105403 | 0.115939  | 4.813091 | -0.000311 | -0.000021 | 0.000971  |
| B  | 4.155007  | 8.978944  | 1.168663 | 0.011112  | 0.010162  | 0.017168  |
| B  | -1.701865 | 4.822656  | 5.198127 | 0.011099  | 0.010168  | 0.017133  |
| B  | 0.452564  | 2.078144  | 2.014732 | 0.011119  | -0.010147 | 0.017168  |
| B  | 2.000578  | 11.723457 | 4.352058 | 0.011093  | -0.010181 | 0.017131  |
| B  | -2.733891 | 11.746082 | 5.839177 | 0.010435  | -0.016416 | 0.001346  |
| B  | 5.187034  | 2.055518  | 0.527613 | 0.010407  | -0.016378 | 0.001332  |
| B  | 3.032605  | 4.845282  | 3.711007 | 0.010416  | 0.016390  | 0.001342  |
| B  | -0.579463 | 8.956318  | 2.655782 | 0.010420  | 0.016407  | 0.001336  |
| B  | -0.983708 | 0.054306  | 1.827988 | 0.022309  | 0.005962  | 0.010943  |
| B  | 3.436850  | 13.747295 | 4.538802 | 0.022271  | 0.005966  | 0.010913  |
| B  | 5.591279  | 6.955106  | 1.355407 | 0.022281  | -0.005965 | 0.010921  |
| B  | -3.138137 | 6.846495  | 5.011383 | 0.022292  | -0.005961 | 0.010931  |
| Si | 0.631772  | 3.486686  | 4.508512 | -0.012256 | 0.003697  | -0.006719 |
| Si | 1.821370  | 10.314915 | 1.858278 | -0.012267 | 0.003687  | -0.006711 |
| Si | -0.333059 | 10.387486 | 5.041673 | -0.012261 | -0.003696 | -0.006719 |
| Si | 2.786201  | 3.414115  | 1.325117 | -0.012263 | -0.003689 | -0.006709 |
| O  | 0.061445  | 3.072947  | 3.041906 | 0.001073  | 0.007246  | 0.009295  |
| O  | 2.391697  | 10.728653 | 3.324884 | 0.001076  | 0.007256  | 0.009309  |
| O  | 4.546126  | 9.973747  | 0.141489 | 0.001076  | -0.007247 | 0.009299  |
| O  | -2.092984 | 3.827853  | 6.225301 | 0.001073  | -0.007254 | 0.009302  |

|   |           |           |          |           |           |           |
|---|-----------|-----------|----------|-----------|-----------|-----------|
| O | 2.197450  | 3.933608  | 4.519003 | 0.009405  | 0.001573  | -0.000606 |
| O | 0.255692  | 9.867992  | 1.847787 | 0.009419  | 0.001573  | -0.000613 |
| O | -1.898737 | 10.834409 | 5.031182 | 0.009405  | -0.001563 | -0.000599 |
| O | 4.351879  | 2.967192  | 1.335608 | 0.009419  | -0.001584 | -0.000621 |
| O | -0.212316 | 4.798696  | 5.055280 | 0.011491  | -0.012896 | -0.004319 |
| O | 2.665458  | 9.002905  | 1.311510 | 0.011500  | -0.012901 | -0.004328 |
| O | 0.511030  | 11.699496 | 4.494905 | 0.011498  | 0.012903  | -0.004321 |
| O | 1.942113  | 2.102105  | 1.871885 | 0.011496  | 0.012897  | -0.004327 |
| O | 0.525580  | 2.169271  | 5.472081 | 0.002372  | -0.002809 | 0.009737  |
| O | 1.927562  | 11.632329 | 0.894709 | 0.002365  | -0.002796 | 0.009700  |
| O | -0.226867 | 9.070071  | 4.078104 | 0.002371  | 0.002805  | 0.009725  |
| O | 2.680009  | 4.731529  | 2.288686 | 0.002367  | 0.002798  | 0.009711  |
| O | 0.058846  | 0.698526  | 2.444964 | -0.019579 | -0.016667 | -0.007236 |
| O | 2.394296  | 13.103075 | 3.921826 | -0.019529 | -0.016618 | -0.007211 |
| O | 4.548725  | 7.599326  | 0.738431 | -0.019558 | 0.016642  | -0.007227 |
| O | -2.095583 | 6.202275  | 5.628359 | -0.019542 | 0.016635  | -0.007218 |
| O | -2.459230 | 13.184059 | 5.445139 | -0.010878 | 0.020341  | -0.016157 |
| O | 4.912372  | 0.617542  | 0.921651 | -0.010885 | 0.020349  | -0.016173 |
| O | 2.757943  | 6.283259  | 4.105046 | -0.010890 | -0.020342 | -0.016171 |
| O | -0.304801 | 7.518342  | 2.261744 | -0.010871 | -0.020347 | -0.016156 |
| O | -0.175430 | 2.374756  | 0.744070 | -0.015534 | 0.004614  | -0.014448 |
| O | 2.628573  | 11.426844 | 5.622720 | -0.015528 | 0.004620  | -0.014432 |
| O | 4.783002  | 9.275557  | 2.439325 | -0.015542 | -0.004618 | -0.014450 |
| O | -2.329859 | 4.526044  | 3.927465 | -0.015518 | -0.004617 | -0.014430 |
| O | -1.223866 | 12.517207 | 2.155216 | 0.018453  | 0.019805  | 0.015206  |
| O | 3.677009  | 1.284394  | 4.211574 | 0.018413  | 0.019748  | 0.015182  |
| O | 5.831438  | 5.616407  | 1.028179 | 0.018431  | -0.019776 | 0.015194  |
| O | -3.378295 | 8.185194  | 5.338611 | 0.018428  | -0.019764 | 0.015192  |
| H | -0.637445 | 12.195109 | 2.878812 | -0.114977 | -0.388579 | -0.071468 |
| H | 3.090587  | 1.606491  | 3.487978 | -0.114753 | -0.387847 | -0.071328 |
| H | 5.245016  | 5.294309  | 0.304583 | -0.114845 | 0.388196  | -0.071409 |
| H | -2.791874 | 8.507292  | 6.062207 | -0.114841 | 0.388131  | -0.071380 |

15 f = 34.382652 THz 216.032573 2PiTHz 1146.881778 cm-1 142.195269  
meV

X Y Z dx dy dz

|    |           |           |          |           |           |           |
|----|-----------|-----------|----------|-----------|-----------|-----------|
| Li | 3.769818  | 9.645336  | 4.001386 | -0.002174 | -0.005093 | -0.006170 |
| Li | -1.316675 | 4.156264  | 2.365404 | 0.002178  | 0.005098  | 0.006180  |
| Li | -3.471104 | 2.744536  | 5.548798 | 0.002178  | -0.005096 | 0.006177  |
| Li | 5.924247  | 11.057064 | 0.817991 | -0.002174 | 0.005092  | -0.006170 |
| Na | 2.049025  | 6.784862  | 1.629696 | -0.000762 | 0.001120  | -0.000843 |
| Na | 0.404117  | 7.016739  | 4.737094 | 0.000762  | -0.001119 | 0.000842  |
| Na | 2.558546  | 13.685662 | 1.553699 | 0.000762  | 0.001119  | 0.000842  |
| Na | -0.105403 | 0.115939  | 4.813091 | -0.000762 | -0.001120 | -0.000843 |
| B  | 4.155007  | 8.978944  | 1.168663 | 0.008615  | -0.021439 | -0.000640 |
| B  | -1.701865 | 4.822656  | 5.198127 | -0.008620 | 0.021463  | 0.000644  |
| B  | 0.452564  | 2.078144  | 2.014732 | -0.008621 | -0.021463 | 0.000648  |
| B  | 2.000578  | 11.723457 | 4.352058 | 0.008610  | 0.021435  | -0.000646 |
| B  | -2.733891 | 11.746082 | 5.839177 | -0.002209 | 0.032090  | -0.004465 |
| B  | 5.187034  | 2.055518  | 0.527613 | 0.002235  | -0.032124 | 0.004483  |
| B  | 3.032605  | 4.845282  | 3.711007 | 0.002237  | 0.032122  | 0.004485  |
| B  | -0.579463 | 8.956318  | 2.655782 | -0.002213 | -0.032096 | -0.004468 |
| B  | -0.983708 | 0.054306  | 1.827988 | -0.024648 | 0.005770  | -0.017365 |
| B  | 3.436850  | 13.747295 | 4.538802 | 0.024666  | -0.005754 | 0.017371  |
| B  | 5.591279  | 6.955106  | 1.355407 | 0.024670  | 0.005757  | 0.017373  |
| B  | -3.138137 | 6.846495  | 5.011383 | -0.024644 | -0.005772 | -0.017364 |
| Si | 0.631772  | 3.486686  | 4.508512 | -0.001639 | -0.001941 | 0.001086  |
| Si | 1.821370  | 10.314915 | 1.858278 | 0.001630  | 0.001945  | -0.001090 |
| Si | -0.333059 | 10.387486 | 5.041673 | 0.001631  | -0.001946 | -0.001092 |
| Si | 2.786201  | 3.414115  | 1.325117 | -0.001640 | 0.001944  | 0.001085  |
| O  | 0.061445  | 3.072947  | 3.041906 | 0.000785  | 0.001303  | 0.002605  |
| O  | 2.391697  | 10.728653 | 3.324884 | -0.000786 | -0.001292 | -0.002591 |
| O  | 4.546126  | 9.973747  | 0.141489 | -0.000786 | 0.001293  | -0.002591 |
| O  | -2.092984 | 3.827853  | 6.225301 | 0.000786  | -0.001306 | 0.002612  |
| O  | 2.197450  | 3.933608  | 4.519003 | -0.007031 | -0.010544 | 0.004349  |
| O  | 0.255692  | 9.867992  | 1.847787 | 0.007029  | 0.010538  | -0.004346 |
| O  | -1.898737 | 10.834409 | 5.031182 | 0.007025  | -0.010536 | -0.004346 |
| O  | 4.351879  | 2.967192  | 1.335608 | -0.007028 | 0.010542  | 0.004347  |
| O  | -0.212316 | 4.798696  | 5.055280 | 0.002759  | -0.007273 | -0.001369 |
| O  | 2.665458  | 9.002905  | 1.311510 | -0.002740 | 0.007259  | 0.001365  |
| O  | 0.511030  | 11.699496 | 4.494905 | -0.002740 | -0.007260 | 0.001366  |
| O  | 1.942113  | 2.102105  | 1.871885 | 0.002758  | 0.007270  | -0.001368 |

|   |           |           |          |           |           |           |
|---|-----------|-----------|----------|-----------|-----------|-----------|
| O | 0.525580  | 2.169271  | 5.472081 | 0.000485  | 0.012931  | -0.011106 |
| O | 1.927562  | 11.632329 | 0.894709 | -0.000486 | -0.012926 | 0.011101  |
| O | -0.226867 | 9.070071  | 4.078104 | -0.000484 | 0.012931  | 0.011106  |
| O | 2.680009  | 4.731529  | 2.288686 | 0.000485  | -0.012932 | -0.011107 |
| O | 0.058846  | 0.698526  | 2.444964 | 0.023424  | 0.025612  | 0.007665  |
| O | 2.394296  | 13.103075 | 3.921826 | -0.023429 | -0.025614 | -0.007666 |
| O | 4.548725  | 7.599326  | 0.738431 | -0.023434 | 0.025621  | -0.007666 |
| O | -2.095583 | 6.202275  | 5.628359 | 0.023418  | -0.025604 | 0.007665  |
| O | -2.459230 | 13.184059 | 5.445139 | -0.010778 | 0.007320  | -0.012126 |
| O | 4.912372  | 0.617542  | 0.921651 | 0.010765  | -0.007301 | 0.012107  |
| O | 2.757943  | 6.283259  | 4.105046 | 0.010763  | 0.007302  | 0.012106  |
| O | -0.304801 | 7.518342  | 2.261744 | -0.010781 | -0.007321 | -0.012127 |
| O | -0.175430 | 2.374756  | 0.744070 | 0.005591  | 0.007037  | -0.000819 |
| O | 2.628573  | 11.426844 | 5.622720 | -0.005603 | -0.007030 | 0.000807  |
| O | 4.783002  | 9.275557  | 2.439325 | -0.005603 | 0.007029  | 0.000803  |
| O | -2.329859 | 4.526044  | 3.927465 | 0.005593  | -0.007039 | -0.000821 |
| O | -1.223866 | 12.517207 | 2.155216 | -0.019977 | -0.029287 | -0.013579 |
| O | 3.677009  | 1.284394  | 4.211574 | 0.019984  | 0.029289  | 0.013592  |
| O | 5.831438  | 5.616407  | 1.028179 | 0.019989  | -0.029294 | 0.013594  |
| O | -3.378295 | 8.185194  | 5.338611 | -0.019971 | 0.029277  | -0.013579 |
| H | -0.637445 | 12.195109 | 2.878812 | 0.111115  | 0.380597  | 0.078928  |
| H | 3.090587  | 1.606491  | 3.487978 | -0.111184 | -0.380861 | -0.078985 |
| H | 5.245016  | 5.294309  | 0.304583 | -0.111198 | 0.380945  | -0.079012 |
| H | -2.791874 | 8.507292  | 6.062207 | 0.111096  | -0.380538 | 0.078918  |

16 f = 34.017288 THz 213.736923 2PiTHz 1134.694550 cm-1 140.684245 meV

|    | X         | Y         | Z        | dx        | dy        | dz        |
|----|-----------|-----------|----------|-----------|-----------|-----------|
| Li | 3.769818  | 9.645336  | 4.001386 | -0.000771 | -0.000780 | -0.010699 |
| Li | -1.316675 | 4.156264  | 2.365404 | -0.000769 | -0.000783 | -0.010684 |
| Li | -3.471104 | 2.744536  | 5.548798 | 0.000769  | -0.000783 | 0.010683  |
| Li | 5.924247  | 11.057064 | 0.817991 | 0.000769  | -0.000778 | 0.010697  |
| Na | 2.049025  | 6.784862  | 1.629696 | 0.000316  | 0.000961  | -0.001014 |
| Na | 0.404117  | 7.016739  | 4.737094 | 0.000316  | 0.000957  | -0.001017 |
| Na | 2.558546  | 13.685662 | 1.553699 | -0.000315 | 0.000961  | 0.001017  |
| Na | -0.105403 | 0.115939  | 4.813091 | -0.000316 | 0.000959  | 0.001014  |

|    |           |           |          |           |           |           |
|----|-----------|-----------|----------|-----------|-----------|-----------|
| B  | 4.155007  | 8.978944  | 1.168663 | -0.010730 | 0.007920  | 0.012252  |
| B  | -1.701865 | 4.822656  | 5.198127 | -0.010740 | 0.007909  | 0.012219  |
| B  | 0.452564  | 2.078144  | 2.014732 | 0.010751  | 0.007910  | -0.012207 |
| B  | 2.000578  | 11.723457 | 4.352058 | 0.010730  | 0.007933  | -0.012260 |
| B  | -2.733891 | 11.746082 | 5.839177 | 0.020474  | 0.017378  | 0.010057  |
| B  | 5.187034  | 2.055518  | 0.527613 | 0.020451  | 0.017347  | 0.010052  |
| B  | 3.032605  | 4.845282  | 3.711007 | -0.020475 | 0.017346  | -0.010060 |
| B  | -0.579463 | 8.956318  | 2.655782 | -0.020470 | 0.017362  | -0.010064 |
| B  | -0.983708 | 0.054306  | 1.827988 | 0.017484  | -0.016275 | 0.016143  |
| B  | 3.436850  | 13.747295 | 4.538802 | 0.017483  | -0.016287 | 0.016148  |
| B  | 5.591279  | 6.955106  | 1.355407 | -0.017480 | -0.016283 | -0.016143 |
| B  | -3.138137 | 6.846495  | 5.011383 | -0.017495 | -0.016281 | -0.016152 |
| Si | 0.631772  | 3.486686  | 4.508512 | 0.003659  | -0.001065 | -0.004452 |
| Si | 1.821370  | 10.314915 | 1.858278 | 0.003655  | -0.001059 | -0.004437 |
| Si | -0.333059 | 10.387486 | 5.041673 | -0.003655 | -0.001059 | 0.004438  |
| Si | 2.786201  | 3.414115  | 1.325117 | -0.003657 | -0.001064 | 0.004454  |
| O  | 0.061445  | 3.072947  | 3.041906 | -0.000354 | 0.007274  | 0.014381  |
| O  | 2.391697  | 10.728653 | 3.324884 | -0.000351 | 0.007263  | 0.014373  |
| O  | 4.546126  | 9.973747  | 0.141489 | 0.000352  | 0.007265  | -0.014372 |
| O  | -2.092984 | 3.827853  | 6.225301 | 0.000350  | 0.007278  | -0.014391 |
| O  | 2.197450  | 3.933608  | 4.519003 | -0.004263 | -0.008041 | 0.001569  |
| O  | 0.255692  | 9.867992  | 1.847787 | -0.004262 | -0.008044 | 0.001565  |
| O  | -1.898737 | 10.834409 | 5.031182 | 0.004264  | -0.008047 | -0.001565 |
| O  | 4.351879  | 2.967192  | 1.335608 | 0.004270  | -0.008043 | -0.001570 |
| O  | -0.212316 | 4.798696  | 5.055280 | -0.006467 | 0.005742  | -0.000052 |
| O  | 2.665458  | 9.002905  | 1.311510 | -0.006448 | 0.005732  | -0.000064 |
| O  | 0.511030  | 11.699496 | 4.494905 | 0.006447  | 0.005728  | 0.000065  |
| O  | 1.942113  | 2.102105  | 1.871885 | 0.006458  | 0.005740  | 0.000053  |
| O  | 0.525580  | 2.169271  | 5.472081 | -0.001726 | -0.004148 | 0.000650  |
| O  | 1.927562  | 11.632329 | 0.894709 | -0.001731 | -0.004145 | 0.000637  |
| O  | -0.226867 | 9.070071  | 4.078104 | 0.001730  | -0.004141 | -0.000634 |
| O  | 2.680009  | 4.731529  | 2.288686 | 0.001729  | -0.004148 | -0.000645 |
| O  | 0.058846  | 0.698526  | 2.444964 | -0.020065 | -0.022133 | -0.003367 |
| O  | 2.394296  | 13.103075 | 3.921826 | -0.020057 | -0.022129 | -0.003361 |
| O  | 4.548725  | 7.599326  | 0.738431 | 0.020051  | -0.022122 | 0.003359  |
| O  | -2.095583 | 6.202275  | 5.628359 | 0.020070  | -0.022138 | 0.003368  |



|   |           |           |          |           |           |           |
|---|-----------|-----------|----------|-----------|-----------|-----------|
| O | -2.459230 | 13.184059 | 5.445139 | -0.012577 | 0.012423  | -0.015615 |
| O | 4.912372  | 0.617542  | 0.921651 | -0.012583 | 0.012439  | -0.015625 |
| O | 2.757943  | 6.283259  | 4.105046 | 0.012589  | 0.012444  | 0.015631  |
| O | -0.304801 | 7.518342  | 2.261744 | 0.012578  | 0.012428  | 0.015617  |
| O | -0.175430 | 2.374756  | 0.744070 | -0.014201 | -0.005199 | -0.004343 |
| O | 2.628573  | 11.426844 | 5.622720 | -0.014195 | -0.005210 | -0.004315 |
| O | 4.783002  | 9.275557  | 2.439325 | 0.014192  | -0.005204 | 0.004320  |
| O | -2.329859 | 4.526044  | 3.927465 | 0.014209  | -0.005201 | 0.004342  |
| O | -1.223866 | 12.517207 | 2.155216 | 0.021265  | 0.032869  | 0.011467  |
| O | 3.677009  | 1.284394  | 4.211574 | 0.021250  | 0.032861  | 0.011456  |
| O | 5.831438  | 5.616407  | 1.028179 | -0.021248 | 0.032853  | -0.011457 |
| O | -3.378295 | 8.185194  | 5.338611 | -0.021268 | 0.032876  | -0.011472 |
| H | -0.637445 | 12.195109 | 2.878812 | -0.113073 | -0.383880 | -0.075827 |
| H | 3.090587  | 1.606491  | 3.487978 | -0.112982 | -0.383557 | -0.075774 |
| H | 5.245016  | 5.294309  | 0.304583 | 0.112964  | -0.383548 | 0.075782  |
| H | -2.791874 | 8.507292  | 6.062207 | 0.113105  | -0.384000 | 0.075854  |

17 f = 33.518157 THz 210.600790 2PiTHz 1118.045330 cm-1 138.620004 meV

|    | X         | Y         | Z        | dx        | dy        | dz        |
|----|-----------|-----------|----------|-----------|-----------|-----------|
| Li | 3.769818  | 9.645336  | 4.001386 | 0.002749  | -0.001742 | -0.003448 |
| Li | -1.316675 | 4.156264  | 2.365404 | 0.002745  | -0.001743 | -0.003442 |
| Li | -3.471104 | 2.744536  | 5.548798 | 0.002744  | 0.001735  | -0.003445 |
| Li | 5.924247  | 11.057064 | 0.817991 | 0.002747  | 0.001749  | -0.003446 |
| Na | 2.049025  | 6.784862  | 1.629696 | 0.000025  | -0.002926 | 0.000507  |
| Na | 0.404117  | 7.016739  | 4.737094 | 0.000026  | -0.002926 | 0.000503  |
| Na | 2.558546  | 13.685662 | 1.553699 | 0.000027  | 0.002927  | 0.000503  |
| Na | -0.105403 | 0.115939  | 4.813091 | 0.000025  | 0.002925  | 0.000506  |
| B  | 4.155007  | 8.978944  | 1.168663 | 0.054488  | -0.028185 | 0.053158  |
| B  | -1.701865 | 4.822656  | 5.198127 | 0.054388  | -0.028200 | 0.053013  |
| B  | 0.452564  | 2.078144  | 2.014732 | 0.054391  | 0.028180  | 0.053023  |
| B  | 2.000578  | 11.723457 | 4.352058 | 0.054465  | 0.028207  | 0.053134  |
| B  | -2.733891 | 11.746082 | 5.839177 | -0.068909 | 0.027598  | -0.046782 |
| B  | 5.187034  | 2.055518  | 0.527613 | -0.068750 | 0.027559  | -0.046680 |
| B  | 3.032605  | 4.845282  | 3.711007 | -0.068766 | -0.027584 | -0.046709 |
| B  | -0.579463 | 8.956318  | 2.655782 | -0.068907 | -0.027578 | -0.046748 |

|    |           |           |          |           |           |           |
|----|-----------|-----------|----------|-----------|-----------|-----------|
| B  | -0.983708 | 0.054306  | 1.827988 | -0.003355 | -0.000046 | -0.000870 |
| B  | 3.436850  | 13.747295 | 4.538802 | -0.003342 | -0.000011 | -0.000864 |
| B  | 5.591279  | 6.955106  | 1.355407 | -0.003346 | 0.000018  | -0.000867 |
| B  | -3.138137 | 6.846495  | 5.011383 | -0.003347 | 0.000040  | -0.000866 |
| Si | 0.631772  | 3.486686  | 4.508512 | -0.004721 | 0.001384  | 0.000638  |
| Si | 1.821370  | 10.314915 | 1.858278 | -0.004730 | 0.001387  | 0.000664  |
| Si | -0.333059 | 10.387486 | 5.041673 | -0.004719 | -0.001382 | 0.000646  |
| Si | 2.786201  | 3.414115  | 1.325117 | -0.004727 | -0.001390 | 0.000652  |
| O  | 0.061445  | 3.072947  | 3.041906 | -0.008011 | -0.013351 | -0.030611 |
| O  | 2.391697  | 10.728653 | 3.324884 | -0.008039 | -0.013386 | -0.030705 |
| O  | 4.546126  | 9.973747  | 0.141489 | -0.008036 | 0.013367  | -0.030677 |
| O  | -2.092984 | 3.827853  | 6.225301 | -0.008015 | 0.013367  | -0.030634 |
| O  | 2.197450  | 3.933608  | 4.519003 | 0.037737  | 0.017486  | -0.005587 |
| O  | 0.255692  | 9.867992  | 1.847787 | 0.037828  | 0.017510  | -0.005598 |
| O  | -1.898737 | 10.834409 | 5.031182 | 0.037792  | -0.017507 | -0.005596 |
| O  | 4.351879  | 2.967192  | 1.335608 | 0.037756  | -0.017480 | -0.005585 |
| O  | -0.212316 | 4.798696  | 5.055280 | -0.020765 | 0.010462  | 0.000457  |
| O  | 2.665458  | 9.002905  | 1.311510 | -0.020794 | 0.010463  | 0.000449  |
| O  | 0.511030  | 11.699496 | 4.494905 | -0.020801 | -0.010475 | 0.000455  |
| O  | 1.942113  | 2.102105  | 1.871885 | -0.020755 | -0.010451 | 0.000452  |
| O  | 0.525580  | 2.169271  | 5.472081 | 0.008970  | -0.017509 | 0.035786  |
| O  | 1.927562  | 11.632329 | 0.894709 | 0.008994  | -0.017509 | 0.035842  |
| O  | -0.226867 | 9.070071  | 4.078104 | 0.008992  | 0.017515  | 0.035841  |
| O  | 2.680009  | 4.731529  | 2.288686 | 0.008975  | 0.017505  | 0.035789  |
| O  | 0.058846  | 0.698526  | 2.444964 | -0.012981 | -0.008791 | -0.009432 |
| O  | 2.394296  | 13.103075 | 3.921826 | -0.013005 | -0.008793 | -0.009464 |
| O  | 4.548725  | 7.599326  | 0.738431 | -0.013005 | 0.008795  | -0.009462 |
| O  | -2.095583 | 6.202275  | 5.628359 | -0.012988 | 0.008794  | -0.009436 |
| O  | -2.459230 | 13.184059 | 5.445139 | 0.014121  | -0.006011 | 0.011374  |
| O  | 4.912372  | 0.617542  | 0.921651 | 0.014086  | -0.005988 | 0.011348  |
| O  | 2.757943  | 6.283259  | 4.105046 | 0.014095  | 0.006002  | 0.011359  |
| O  | -0.304801 | 7.518342  | 2.261744 | 0.014111  | 0.005991  | 0.011358  |
| O  | -0.175430 | 2.374756  | 0.744070 | -0.000056 | -0.000101 | -0.004894 |
| O  | 2.628573  | 11.426844 | 5.622720 | -0.000018 | -0.000098 | -0.004886 |
| O  | 4.783002  | 9.275557  | 2.439325 | -0.000036 | 0.000086  | -0.004913 |
| O  | -2.329859 | 4.526044  | 3.927465 | -0.000044 | 0.000109  | -0.004876 |

|   |           |           |          |           |           |           |
|---|-----------|-----------|----------|-----------|-----------|-----------|
| O | -1.223866 | 12.517207 | 2.155216 | 0.000562  | 0.003723  | -0.001836 |
| O | 3.677009  | 1.284394  | 4.211574 | 0.000555  | 0.003707  | -0.001833 |
| O | 5.831438  | 5.616407  | 1.028179 | 0.000568  | -0.003718 | -0.001825 |
| O | -3.378295 | 8.185194  | 5.338611 | 0.000556  | -0.003719 | -0.001838 |
| H | -0.637445 | 12.195109 | 2.878812 | -0.008216 | 0.008996  | 0.011530  |
| H | 3.090587  | 1.606491  | 3.487978 | -0.008185 | 0.009059  | 0.011529  |
| H | 5.245016  | 5.294309  | 0.304583 | -0.008242 | -0.008869 | 0.011498  |
| H | -2.791874 | 8.507292  | 6.062207 | -0.008199 | -0.009071 | 0.011548  |

18 f = 33.270156 THz 209.042555 2PiTHz 1109.772913 cm-1 137.594354 meV

|    | X         | Y         | Z        | dx        | dy        | dz        |
|----|-----------|-----------|----------|-----------|-----------|-----------|
| Li | 3.769818  | 9.645336  | 4.001386 | -0.002689 | 0.001908  | 0.000973  |
| Li | -1.316675 | 4.156264  | 2.365404 | 0.002698  | -0.001914 | -0.000986 |
| Li | -3.471104 | 2.744536  | 5.548798 | 0.002693  | 0.001910  | -0.000979 |
| Li | 5.924247  | 11.057064 | 0.817991 | -0.002690 | -0.001910 | 0.000979  |
| Na | 2.049025  | 6.784862  | 1.629696 | 0.000122  | -0.000249 | 0.000220  |
| Na | 0.404117  | 7.016739  | 4.737094 | -0.000121 | 0.000242  | -0.000217 |
| Na | 2.558546  | 13.685662 | 1.553699 | -0.000121 | -0.000243 | -0.000218 |
| Na | -0.105403 | 0.115939  | 4.813091 | 0.000122  | 0.000248  | 0.000220  |
| B  | 4.155007  | 8.978944  | 1.168663 | -0.050836 | 0.002399  | -0.067140 |
| B  | -1.701865 | 4.822656  | 5.198127 | 0.050960  | -0.002468 | 0.067260  |
| B  | 0.452564  | 2.078144  | 2.014732 | 0.050935  | 0.002472  | 0.067213  |
| B  | 2.000578  | 11.723457 | 4.352058 | -0.050848 | -0.002402 | -0.067163 |
| B  | -2.733891 | 11.746082 | 5.839177 | 0.078306  | -0.003197 | 0.041181  |
| B  | 5.187034  | 2.055518  | 0.527613 | -0.078375 | 0.003263  | -0.041252 |
| B  | 3.032605  | 4.845282  | 3.711007 | -0.078430 | -0.003260 | -0.041275 |
| B  | -0.579463 | 8.956318  | 2.655782 | 0.078287  | 0.003199  | 0.041161  |
| B  | -0.983708 | 0.054306  | 1.827988 | -0.003833 | 0.015520  | -0.005935 |
| B  | 3.436850  | 13.747295 | 4.538802 | 0.003815  | -0.015535 | 0.005933  |
| B  | 5.591279  | 6.955106  | 1.355407 | 0.003820  | 0.015535  | 0.005934  |
| B  | -3.138137 | 6.846495  | 5.011383 | -0.003832 | -0.015530 | -0.005938 |
| Si | 0.631772  | 3.486686  | 4.508512 | -0.005074 | 0.001113  | 0.000690  |
| Si | 1.821370  | 10.314915 | 1.858278 | 0.005056  | -0.001112 | -0.000697 |
| Si | -0.333059 | 10.387486 | 5.041673 | 0.005061  | 0.001108  | -0.000697 |
| Si | 2.786201  | 3.414115  | 1.325117 | -0.005068 | -0.001118 | 0.000692  |

|   |           |           |          |           |           |           |
|---|-----------|-----------|----------|-----------|-----------|-----------|
| O | 0.061445  | 3.072947  | 3.041906 | -0.008620 | -0.009734 | -0.029732 |
| O | 2.391697  | 10.728653 | 3.324884 | 0.008622  | 0.009715  | 0.029710  |
| O | 4.546126  | 9.973747  | 0.141489 | 0.008618  | -0.009710 | 0.029695  |
| O | -2.092984 | 3.827853  | 6.225301 | -0.008624 | 0.009743  | -0.029755 |
| O | 2.197450  | 3.933608  | 4.519003 | 0.036938  | 0.013034  | -0.004182 |
| O | 0.255692  | 9.867992  | 1.847787 | -0.036861 | -0.012992 | 0.004160  |
| O | -1.898737 | 10.834409 | 5.031182 | -0.036867 | 0.012995  | 0.004163  |
| O | 4.351879  | 2.967192  | 1.335608 | 0.036918  | -0.013025 | -0.004176 |
| O | -0.212316 | 4.798696  | 5.055280 | -0.018737 | 0.005305  | -0.001303 |
| O | 2.665458  | 9.002905  | 1.311510 | 0.018694  | -0.005292 | 0.001301  |
| O | 0.511030  | 11.699496 | 4.494905 | 0.018695  | 0.005290  | 0.001304  |
| O | 1.942113  | 2.102105  | 1.871885 | -0.018727 | -0.005306 | -0.001299 |
| O | 0.525580  | 2.169271  | 5.472081 | 0.010576  | -0.011693 | 0.032757  |
| O | 1.927562  | 11.632329 | 0.894709 | -0.010567 | 0.011657  | -0.032701 |
| O | -0.226867 | 9.070071  | 4.078104 | -0.010564 | -0.011653 | -0.032683 |
| O | 2.680009  | 4.731529  | 2.288686 | 0.010584  | 0.011699  | 0.032778  |
| O | 0.058846  | 0.698526  | 2.444964 | -0.007731 | 0.002570  | -0.010369 |
| O | 2.394296  | 13.103075 | 3.921826 | 0.007716  | -0.002593 | 0.010359  |
| O | 4.548725  | 7.599326  | 0.738431 | 0.007706  | 0.002598  | 0.010354  |
| O | -2.095583 | 6.202275  | 5.628359 | -0.007739 | -0.002572 | -0.010377 |
| O | -2.459230 | 13.184059 | 5.445139 | -0.016209 | -0.000196 | -0.009780 |
| O | 4.912372  | 0.617542  | 0.921651 | 0.016238  | 0.000172  | 0.009807  |
| O | 2.757943  | 6.283259  | 4.105046 | 0.016245  | -0.000180 | 0.009808  |
| O | -0.304801 | 7.518342  | 2.261744 | -0.016211 | 0.000184  | -0.009784 |
| O | -0.175430 | 2.374756  | 0.744070 | 0.003839  | 0.007113  | -0.011816 |
| O | 2.628573  | 11.426844 | 5.622720 | -0.003857 | -0.007126 | 0.011815  |
| O | 4.783002  | 9.275557  | 2.439325 | -0.003860 | 0.007126  | 0.011813  |
| O | -2.329859 | 4.526044  | 3.927465 | 0.003843  | -0.007119 | -0.011824 |
| O | -1.223866 | 12.517207 | 2.155216 | -0.002153 | -0.011003 | 0.001496  |
| O | 3.677009  | 1.284394  | 4.211574 | 0.002153  | 0.011016  | -0.001507 |
| O | 5.831438  | 5.616407  | 1.028179 | 0.002159  | -0.011021 | -0.001500 |
| O | -3.378295 | 8.185194  | 5.338611 | -0.002152 | 0.011007  | 0.001500  |
| H | -0.637445 | 12.195109 | 2.878812 | 0.017018  | 0.036420  | 0.003045  |
| H | 3.090587  | 1.606491  | 3.487978 | -0.016981 | -0.036263 | -0.003010 |
| H | 5.245016  | 5.294309  | 0.304583 | -0.017027 | 0.036412  | -0.003035 |
| H | -2.791874 | 8.507292  | 6.062207 | 0.016992  | -0.036362 | 0.003044  |

19 f = 33.101190 THz 207.980912 2PiTHz 1104.136824 cm-1 136.895568

meV

|    | X         | Y         | Z        | dx        | dy        | dz        |
|----|-----------|-----------|----------|-----------|-----------|-----------|
| Li | 3.769818  | 9.645336  | 4.001386 | 0.001938  | -0.004086 | -0.015741 |
| Li | -1.316675 | 4.156264  | 2.365404 | 0.001931  | -0.004097 | -0.015759 |
| Li | -3.471104 | 2.744536  | 5.548798 | -0.001933 | -0.004098 | 0.015761  |
| Li | 5.924247  | 11.057064 | 0.817991 | -0.001937 | -0.004086 | 0.015739  |
| Na | 2.049025  | 6.784862  | 1.629696 | 0.000279  | -0.000670 | 0.000644  |
| Na | 0.404117  | 7.016739  | 4.737094 | 0.000279  | -0.000665 | 0.000642  |
| Na | 2.558546  | 13.685662 | 1.553699 | -0.000279 | -0.000665 | -0.000642 |
| Na | -0.105403 | 0.115939  | 4.813091 | -0.000279 | -0.000670 | -0.000645 |
| B  | 4.155007  | 8.978944  | 1.168663 | 0.023343  | -0.000784 | 0.075549  |
| B  | -1.701865 | 4.822656  | 5.198127 | 0.023246  | -0.000810 | 0.075603  |
| B  | 0.452564  | 2.078144  | 2.014732 | -0.023279 | -0.000799 | -0.075644 |
| B  | 2.000578  | 11.723457 | 4.352058 | -0.023320 | -0.000804 | -0.075515 |
| B  | -2.733891 | 11.746082 | 5.839177 | 0.067893  | 0.011046  | 0.056273  |
| B  | 5.187034  | 2.055518  | 0.527613 | 0.068073  | 0.011080  | 0.056428  |
| B  | 3.032605  | 4.845282  | 3.711007 | -0.068026 | 0.011069  | -0.056404 |
| B  | -0.579463 | 8.956318  | 2.655782 | -0.067931 | 0.011064  | -0.056287 |
| B  | -0.983708 | 0.054306  | 1.827988 | -0.007360 | -0.013429 | 0.000072  |
| B  | 3.436850  | 13.747295 | 4.538802 | -0.007358 | -0.013377 | 0.000061  |
| B  | 5.591279  | 6.955106  | 1.355407 | 0.007355  | -0.013384 | -0.000065 |
| B  | -3.138137 | 6.846495  | 5.011383 | 0.007364  | -0.013422 | -0.000066 |
| Si | 0.631772  | 3.486686  | 4.508512 | -0.005452 | -0.006620 | -0.003234 |
| Si | 1.821370  | 10.314915 | 1.858278 | -0.005472 | -0.006605 | -0.003204 |
| Si | -0.333059 | 10.387486 | 5.041673 | 0.005469  | -0.006606 | 0.003204  |
| Si | 2.786201  | 3.414115  | 1.325117 | 0.005455  | -0.006619 | 0.003234  |
| O  | 0.061445  | 3.072947  | 3.041906 | 0.003573  | 0.014875  | 0.041590  |
| O  | 2.391697  | 10.728653 | 3.324884 | 0.003580  | 0.014823  | 0.041469  |
| O  | 4.546126  | 9.973747  | 0.141489 | -0.003581 | 0.014824  | -0.041477 |
| O  | -2.092984 | 3.827853  | 6.225301 | -0.003570 | 0.014871  | -0.041574 |
| O  | 2.197450  | 3.933608  | 4.519003 | 0.012837  | 0.003244  | -0.001124 |
| O  | 0.255692  | 9.867992  | 1.847787 | 0.012907  | 0.003267  | -0.001148 |
| O  | -1.898737 | 10.834409 | 5.031182 | -0.012894 | 0.003264  | 0.001148  |
| O  | 4.351879  | 2.967192  | 1.335608 | -0.012856 | 0.003250  | 0.001125  |

|   |           |           |          |           |           |           |
|---|-----------|-----------|----------|-----------|-----------|-----------|
| O | -0.212316 | 4.798696  | 5.055280 | -0.006358 | -0.006606 | -0.009534 |
| O | 2.665458  | 9.002905  | 1.311510 | -0.006366 | -0.006587 | -0.009520 |
| O | 0.511030  | 11.699496 | 4.494905 | 0.006361  | -0.006586 | 0.009519  |
| O | 1.942113  | 2.102105  | 1.871885 | 0.006367  | -0.006606 | 0.009535  |
| O | 0.525580  | 2.169271  | 5.472081 | -0.010996 | 0.012895  | -0.040448 |
| O | 1.927562  | 11.632329 | 0.894709 | -0.010978 | 0.012865  | -0.040374 |
| O | -0.226867 | 9.070071  | 4.078104 | 0.010982  | 0.012869  | 0.040383  |
| O | 2.680009  | 4.731529  | 2.288686 | 0.010991  | 0.012890  | 0.040431  |
| O | 0.058846  | 0.698526  | 2.444964 | 0.010517  | 0.001003  | 0.013353  |
| O | 2.394296  | 13.103075 | 3.921826 | 0.010517  | 0.001030  | 0.013326  |
| O | 4.548725  | 7.599326  | 0.738431 | -0.010523 | 0.001019  | -0.013340 |
| O | -2.095583 | 6.202275  | 5.628359 | -0.010507 | 0.001011  | -0.013338 |
| O | -2.459230 | 13.184059 | 5.445139 | -0.007497 | -0.010044 | -0.001928 |
| O | 4.912372  | 0.617542  | 0.921651 | -0.007531 | -0.010030 | -0.001960 |
| O | 2.757943  | 6.283259  | 4.105046 | 0.007515  | -0.010022 | 0.001952  |
| O | -0.304801 | 7.518342  | 2.261744 | 0.007511  | -0.010053 | 0.001933  |
| O | -0.175430 | 2.374756  | 0.744070 | -0.009986 | -0.008452 | 0.008369  |
| O | 2.628573  | 11.426844 | 5.622720 | -0.009894 | -0.008427 | 0.008390  |
| O | 4.783002  | 9.275557  | 2.439325 | 0.009898  | -0.008430 | -0.008393 |
| O | -2.329859 | 4.526044  | 3.927465 | 0.009982  | -0.008452 | -0.008367 |
| O | -1.223866 | 12.517207 | 2.155216 | -0.004801 | 0.004031  | -0.007319 |
| O | 3.677009  | 1.284394  | 4.211574 | -0.004823 | 0.004000  | -0.007327 |
| O | 5.831438  | 5.616407  | 1.028179 | 0.004822  | 0.004012  | 0.007328  |
| O | -3.378295 | 8.185194  | 5.338611 | 0.004801  | 0.004022  | 0.007318  |
| H | -0.637445 | 12.195109 | 2.878812 | 0.043487  | 0.088516  | -0.002516 |
| H | 3.090587  | 1.606491  | 3.487978 | 0.043613  | 0.088744  | -0.002506 |
| H | 5.245016  | 5.294309  | 0.304583 | -0.043601 | 0.088744  | 0.002501  |
| H | -2.791874 | 8.507292  | 6.062207 | -0.043495 | 0.088522  | 0.002516  |

20 f = 33.044669 THz 207.625779 2PiTHz 1102.251480 cm-1 136.661815 meV

|    | X         | Y         | Z        | dx        | dy        | dz        |
|----|-----------|-----------|----------|-----------|-----------|-----------|
| Li | 3.769818  | 9.645336  | 4.001386 | -0.000668 | 0.006834  | 0.010669  |
| Li | -1.316675 | 4.156264  | 2.365404 | 0.000660  | -0.006827 | -0.010628 |
| Li | -3.471104 | 2.744536  | 5.548798 | -0.000667 | -0.006826 | 0.010632  |
| Li | 5.924247  | 11.057064 | 0.817991 | 0.000663  | 0.006835  | -0.010666 |

|    |           |           |          |           |           |           |
|----|-----------|-----------|----------|-----------|-----------|-----------|
| Na | 2.049025  | 6.784862  | 1.629696 | -0.000123 | -0.001633 | 0.000093  |
| Na | 0.404117  | 7.016739  | 4.737094 | 0.000122  | 0.001635  | -0.000087 |
| Na | 2.558546  | 13.685662 | 1.553699 | -0.000123 | 0.001635  | 0.000087  |
| Na | -0.105403 | 0.115939  | 4.813091 | 0.000123  | -0.001633 | -0.000093 |
| B  | 4.155007  | 8.978944  | 1.168663 | -0.000430 | 0.002562  | -0.059428 |
| B  | -1.701865 | 4.822656  | 5.198127 | 0.000321  | -0.002540 | 0.059226  |
| B  | 0.452564  | 2.078144  | 2.014732 | -0.000355 | -0.002557 | -0.059247 |
| B  | 2.000578  | 11.723457 | 4.352058 | 0.000416  | 0.002552  | 0.059428  |
| B  | -2.733891 | 11.746082 | 5.839177 | -0.068045 | -0.008948 | -0.060738 |
| B  | 5.187034  | 2.055518  | 0.527613 | 0.067910  | 0.008914  | 0.060640  |
| B  | 3.032605  | 4.845282  | 3.711007 | -0.067893 | 0.008930  | -0.060618 |
| B  | -0.579463 | 8.956318  | 2.655782 | 0.068043  | -0.008938 | 0.060746  |
| B  | -0.983708 | 0.054306  | 1.827988 | 0.000609  | -0.019665 | 0.004016  |
| B  | 3.436850  | 13.747295 | 4.538802 | -0.000612 | 0.019685  | -0.004023 |
| B  | 5.591279  | 6.955106  | 1.355407 | 0.000611  | 0.019690  | 0.004026  |
| B  | -3.138137 | 6.846495  | 5.011383 | -0.000610 | -0.019658 | -0.004012 |
| Si | 0.631772  | 3.486686  | 4.508512 | 0.001478  | -0.007281 | -0.011296 |
| Si | 1.821370  | 10.314915 | 1.858278 | -0.001460 | 0.007288  | 0.011282  |
| Si | -0.333059 | 10.387486 | 5.041673 | 0.001464  | 0.007288  | -0.011282 |
| Si | 2.786201  | 3.414115  | 1.325117 | -0.001470 | -0.007280 | 0.011296  |
| O  | 0.061445  | 3.072947  | 3.041906 | 0.002147  | 0.021063  | 0.049125  |
| O  | 2.391697  | 10.728653 | 3.324884 | -0.002157 | -0.021070 | -0.049165 |
| O  | 4.546126  | 9.973747  | 0.141489 | 0.002160  | -0.021076 | 0.049174  |
| O  | -2.092984 | 3.827853  | 6.225301 | -0.002141 | 0.021053  | -0.049105 |
| O  | 2.197450  | 3.933608  | 4.519003 | -0.002977 | -0.002935 | 0.004929  |
| O  | 0.255692  | 9.867992  | 1.847787 | 0.002915  | 0.002916  | -0.004918 |
| O  | -1.898737 | 10.834409 | 5.031182 | -0.002935 | 0.002924  | 0.004922  |
| O  | 4.351879  | 2.967192  | 1.335608 | 0.002941  | -0.002920 | -0.004924 |
| O  | -0.212316 | 4.798696  | 5.055280 | -0.007632 | -0.003056 | -0.006341 |
| O  | 2.665458  | 9.002905  | 1.311510 | 0.007643  | 0.003061  | 0.006363  |
| O  | 0.511030  | 11.699496 | 4.494905 | -0.007638 | 0.003065  | -0.006368 |
| O  | 1.942113  | 2.102105  | 1.871885 | 0.007643  | -0.003049 | 0.006336  |
| O  | 0.525580  | 2.169271  | 5.472081 | -0.009509 | 0.010234  | -0.031548 |
| O  | 1.927562  | 11.632329 | 0.894709 | 0.009535  | -0.010260 | 0.031623  |
| O  | -0.226867 | 9.070071  | 4.078104 | -0.009533 | -0.010263 | -0.031630 |
| O  | 2.680009  | 4.731529  | 2.288686 | 0.009508  | 0.010226  | 0.031527  |

|   |           |           |          |           |           |           |
|---|-----------|-----------|----------|-----------|-----------|-----------|
| O | 0.058846  | 0.698526  | 2.444964 | -0.000614 | -0.010481 | 0.009622  |
| O | 2.394296  | 13.103075 | 3.921826 | 0.000594  | 0.010482  | -0.009647 |
| O | 4.548725  | 7.599326  | 0.738431 | -0.000595 | 0.010480  | 0.009645  |
| O | -2.095583 | 6.202275  | 5.628359 | 0.000616  | -0.010485 | -0.009620 |
| O | -2.459230 | 13.184059 | 5.445139 | 0.013901  | -0.004937 | 0.011914  |
| O | 4.912372  | 0.617542  | 0.921651 | -0.013875 | 0.004955  | -0.011901 |
| O | 2.757943  | 6.283259  | 4.105046 | 0.013872  | 0.004954  | 0.011899  |
| O | -0.304801 | 7.518342  | 2.261744 | -0.013900 | -0.004939 | -0.011913 |
| O | -0.175430 | 2.374756  | 0.744070 | -0.025694 | -0.006309 | -0.004045 |
| O | 2.628573  | 11.426844 | 5.622720 | 0.025712  | 0.006329  | 0.003983  |
| O | 4.783002  | 9.275557  | 2.439325 | -0.025694 | 0.006323  | -0.003992 |
| O | -2.329859 | 4.526044  | 3.927465 | 0.025715  | -0.006316 | 0.004038  |
| O | -1.223866 | 12.517207 | 2.155216 | 0.009953  | 0.016469  | 0.003925  |
| O | 3.677009  | 1.284394  | 4.211574 | -0.009942 | -0.016474 | -0.003916 |
| O | 5.831438  | 5.616407  | 1.028179 | 0.009945  | -0.016477 | 0.003917  |
| O | -3.378295 | 8.185194  | 5.338611 | -0.009950 | 0.016464  | -0.003925 |
| H | -0.637445 | 12.195109 | 2.878812 | -0.053350 | -0.116860 | -0.011831 |
| H | 3.090587  | 1.606491  | 3.487978 | 0.053264  | 0.116830  | 0.011905  |
| H | 5.245016  | 5.294309  | 0.304583 | -0.053275 | 0.116806  | -0.011883 |
| H | -2.791874 | 8.507292  | 6.062207 | 0.053333  | -0.116900 | 0.011865  |

21 f = 32.639684 THz 205.081181 2PiTHz 1088.742620 cm-1 134.986929 meV

|    | X         | Y         | Z        | dx        | dy        | dz        |
|----|-----------|-----------|----------|-----------|-----------|-----------|
| Li | 3.769818  | 9.645336  | 4.001386 | -0.012955 | 0.003056  | 0.000446  |
| Li | -1.316675 | 4.156264  | 2.365404 | -0.013037 | 0.003068  | 0.000463  |
| Li | -3.471104 | 2.744536  | 5.548798 | 0.013038  | 0.003068  | -0.000464 |
| Li | 5.924247  | 11.057064 | 0.817991 | 0.012955  | 0.003056  | -0.000446 |
| Na | 2.049025  | 6.784862  | 1.629696 | 0.000582  | -0.000428 | 0.000175  |
| Na | 0.404117  | 7.016739  | 4.737094 | 0.000575  | -0.000414 | 0.000172  |
| Na | 2.558546  | 13.685662 | 1.553699 | -0.000575 | -0.000415 | -0.000171 |
| Na | -0.105403 | 0.115939  | 4.813091 | -0.000582 | -0.000428 | -0.000175 |
| B  | 4.155007  | 8.978944  | 1.168663 | -0.057040 | -0.021640 | -0.028854 |
| B  | -1.701865 | 4.822656  | 5.198127 | -0.057379 | -0.021818 | -0.029126 |
| B  | 0.452564  | 2.078144  | 2.014732 | 0.057393  | -0.021833 | 0.029151  |
| B  | 2.000578  | 11.723457 | 4.352058 | 0.057038  | -0.021622 | 0.028845  |



|    |           |           |          |           |           |           |
|----|-----------|-----------|----------|-----------|-----------|-----------|
| B  | -2.733891 | 11.746082 | 5.839177 | -0.024628 | 0.006393  | 0.067600  |
| B  | 5.187034  | 2.055518  | 0.527613 | -0.024948 | 0.006355  | 0.067898  |
| B  | 3.032605  | 4.845282  | 3.711007 | 0.024932  | 0.006367  | -0.067899 |
| B  | -0.579463 | 8.956318  | 2.655782 | 0.024624  | 0.006381  | -0.067613 |
| B  | -0.983708 | 0.054306  | 1.827988 | -0.011020 | 0.006453  | -0.011094 |
| B  | 3.436850  | 13.747295 | 4.538802 | -0.010972 | 0.006386  | -0.011062 |
| B  | 5.591279  | 6.955106  | 1.355407 | 0.010974  | 0.006387  | 0.011065  |
| B  | -3.138137 | 6.846495  | 5.011383 | 0.011020  | 0.006452  | 0.011092  |
| Si | 0.631772  | 3.486686  | 4.508512 | 0.011141  | 0.005879  | -0.012883 |
| Si | 1.821370  | 10.314915 | 1.858278 | 0.011096  | 0.005874  | -0.012824 |
| Si | -0.333059 | 10.387486 | 5.041673 | -0.011092 | 0.005874  | 0.012826  |
| Si | 2.786201  | 3.414115  | 1.325117 | -0.011142 | 0.005877  | 0.012883  |
| O  | 0.061445  | 3.072947  | 3.041906 | 0.001080  | 0.010822  | 0.025744  |
| O  | 2.391697  | 10.728653 | 3.324884 | 0.001075  | 0.010761  | 0.025645  |
| O  | 4.546126  | 9.973747  | 0.141489 | -0.001075 | 0.010766  | -0.025653 |
| O  | -2.092984 | 3.827853  | 6.225301 | -0.001084 | 0.010820  | -0.025748 |
| O  | 2.197450  | 3.933608  | 4.519003 | -0.056698 | -0.027623 | 0.024412  |
| O  | 0.255692  | 9.867992  | 1.847787 | -0.056404 | -0.027487 | 0.024293  |
| O  | -1.898737 | 10.834409 | 5.031182 | 0.056396  | -0.027486 | -0.024293 |
| O  | 4.351879  | 2.967192  | 1.335608 | 0.056702  | -0.027623 | -0.024415 |
| O  | -0.212316 | 4.798696  | 5.055280 | 0.019607  | -0.007397 | -0.003194 |
| O  | 2.665458  | 9.002905  | 1.311510 | 0.019483  | -0.007384 | -0.003189 |
| O  | 0.511030  | 11.699496 | 4.494905 | -0.019487 | -0.007389 | 0.003191  |
| O  | 1.942113  | 2.102105  | 1.871885 | -0.019607 | -0.007393 | 0.003192  |
| O  | 0.525580  | 2.169271  | 5.472081 | 0.004993  | 0.006626  | -0.012798 |
| O  | 1.927562  | 11.632329 | 0.894709 | 0.004937  | 0.006564  | -0.012753 |
| O  | -0.226867 | 9.070071  | 4.078104 | -0.004938 | 0.006569  | 0.012758  |
| O  | 2.680009  | 4.731529  | 2.288686 | -0.004989 | 0.006626  | 0.012805  |
| O  | 0.058846  | 0.698526  | 2.444964 | 0.002152  | 0.006645  | 0.001751  |
| O  | 2.394296  | 13.103075 | 3.921826 | 0.002126  | 0.006572  | 0.001768  |
| O  | 4.548725  | 7.599326  | 0.738431 | -0.002130 | 0.006578  | -0.001768 |
| O  | -2.095583 | 6.202275  | 5.628359 | -0.002151 | 0.006639  | -0.001753 |
| O  | -2.459230 | 13.184059 | 5.445139 | 0.007889  | 0.005327  | -0.002928 |
| O  | 4.912372  | 0.617542  | 0.921651 | 0.007930  | 0.005394  | -0.002961 |
| O  | 2.757943  | 6.283259  | 4.105046 | -0.007931 | 0.005387  | 0.002957  |
| O  | -0.304801 | 7.518342  | 2.261744 | -0.007888 | 0.005333  | 0.002933  |

|   |           |           |          |           |           |           |
|---|-----------|-----------|----------|-----------|-----------|-----------|
| O | -0.175430 | 2.374756  | 0.744070 | -0.026600 | 0.006360  | -0.032021 |
| O | 2.628573  | 11.426844 | 5.622720 | -0.026506 | 0.006286  | -0.031814 |
| O | 4.783002  | 9.275557  | 2.439325 | 0.026512  | 0.006288  | 0.031824  |
| O | -2.329859 | 4.526044  | 3.927465 | 0.026596  | 0.006357  | 0.032010  |
| O | -1.223866 | 12.517207 | 2.155216 | -0.005202 | -0.007299 | 0.000956  |
| O | 3.677009  | 1.284394  | 4.211574 | -0.005201 | -0.007210 | 0.000956  |
| O | 5.831438  | 5.616407  | 1.028179 | 0.005201  | -0.007214 | -0.000957 |
| O | -3.378295 | 8.185194  | 5.338611 | 0.005202  | -0.007294 | -0.000953 |
| H | -0.637445 | 12.195109 | 2.878812 | 0.038680  | 0.024174  | -0.012943 |
| H | 3.090587  | 1.606491  | 3.487978 | 0.038799  | 0.024019  | -0.013123 |
| H | 5.245016  | 5.294309  | 0.304583 | -0.038796 | 0.023995  | 0.013130  |
| H | -2.791874 | 8.507292  | 6.062207 | -0.038685 | 0.024216  | 0.012933  |

22 f = 32.555774 THz 204.553962 2PiTHz 1085.943701 cm-1 134.639908  
meV

|    | X         | Y         | Z        | dx        | dy        | dz        |
|----|-----------|-----------|----------|-----------|-----------|-----------|
| Li | 3.769818  | 9.645336  | 4.001386 | -0.014438 | 0.002058  | 0.000812  |
| Li | -1.316675 | 4.156264  | 2.365404 | 0.014362  | -0.002041 | -0.000820 |
| Li | -3.471104 | 2.744536  | 5.548798 | -0.014361 | -0.002040 | 0.000821  |
| Li | 5.924247  | 11.057064 | 0.817991 | 0.014440  | 0.002059  | -0.000812 |
| Na | 2.049025  | 6.784862  | 1.629696 | -0.000601 | 0.002577  | -0.000840 |
| Na | 0.404117  | 7.016739  | 4.737094 | 0.000605  | -0.002581 | 0.000836  |
| Na | 2.558546  | 13.685662 | 1.553699 | -0.000605 | -0.002579 | -0.000835 |
| Na | -0.105403 | 0.115939  | 4.813091 | 0.000601  | 0.002579  | 0.000841  |
| B  | 4.155007  | 8.978944  | 1.168663 | -0.058419 | -0.031374 | -0.043745 |
| B  | -1.701865 | 4.822656  | 5.198127 | 0.058098  | 0.031216  | 0.043623  |
| B  | 0.452564  | 2.078144  | 2.014732 | -0.058089 | 0.031252  | -0.043643 |
| B  | 2.000578  | 11.723457 | 4.352058 | 0.058440  | -0.031338 | 0.043747  |
| B  | -2.733891 | 11.746082 | 5.839177 | -0.045495 | -0.001176 | 0.056932  |
| B  | 5.187034  | 2.055518  | 0.527613 | 0.045387  | 0.001261  | -0.056531 |
| B  | 3.032605  | 4.845282  | 3.711007 | -0.045378 | 0.001231  | 0.056514  |
| B  | -0.579463 | 8.956318  | 2.655782 | 0.045479  | -0.001205 | -0.056963 |
| B  | -0.983708 | 0.054306  | 1.827988 | 0.011223  | -0.009299 | 0.006953  |
| B  | 3.436850  | 13.747295 | 4.538802 | -0.011301 | 0.009314  | -0.007020 |
| B  | 5.591279  | 6.955106  | 1.355407 | 0.011299  | 0.009320  | 0.007022  |
| B  | -3.138137 | 6.846495  | 5.011383 | -0.011226 | -0.009290 | -0.006951 |

|    |           |           |          |           |           |           |
|----|-----------|-----------|----------|-----------|-----------|-----------|
| Si | 0.631772  | 3.486686  | 4.508512 | -0.007905 | -0.001229 | 0.009827  |
| Si | 1.821370  | 10.314915 | 1.858278 | 0.007965  | 0.001258  | -0.009902 |
| Si | -0.333059 | 10.387486 | 5.041673 | -0.007965 | 0.001256  | 0.009903  |
| Si | 2.786201  | 3.414115  | 1.325117 | 0.007900  | -0.001230 | -0.009827 |
| O  | 0.061445  | 3.072947  | 3.041906 | -0.001143 | -0.010409 | -0.019878 |
| O  | 2.391697  | 10.728653 | 3.324884 | 0.001152  | 0.010470  | 0.020044  |
| O  | 4.546126  | 9.973747  | 0.141489 | -0.001153 | 0.010484  | -0.020064 |
| O  | -2.092984 | 3.827853  | 6.225301 | 0.001146  | -0.010399 | 0.019871  |
| O  | 2.197450  | 3.933608  | 4.519003 | 0.050905  | 0.023654  | -0.021466 |
| O  | 0.255692  | 9.867992  | 1.847787 | -0.051214 | -0.023797 | 0.021599  |
| O  | -1.898737 | 10.834409 | 5.031182 | 0.051224  | -0.023810 | -0.021607 |
| O  | 4.351879  | 2.967192  | 1.335608 | -0.050891 | 0.023639  | 0.021460  |
| O  | -0.212316 | 4.798696  | 5.055280 | -0.019997 | 0.003107  | 0.000897  |
| O  | 2.665458  | 9.002905  | 1.311510 | 0.020097  | -0.003147 | -0.000913 |
| O  | 0.511030  | 11.699496 | 4.494905 | -0.020110 | -0.003158 | 0.000919  |
| O  | 1.942113  | 2.102105  | 1.871885 | 0.019989  | 0.003099  | -0.000890 |
| O  | 0.525580  | 2.169271  | 5.472081 | -0.007860 | -0.010906 | 0.012007  |
| O  | 1.927562  | 11.632329 | 0.894709 | 0.007883  | 0.010941  | -0.012091 |
| O  | -0.226867 | 9.070071  | 4.078104 | -0.007882 | 0.010958  | 0.012116  |
| O  | 2.680009  | 4.731529  | 2.288686 | 0.007858  | -0.010895 | -0.011993 |
| O  | 0.058846  | 0.698526  | 2.444964 | -0.004056 | -0.011742 | 0.002265  |
| O  | 2.394296  | 13.103075 | 3.921826 | 0.004062  | 0.011770  | -0.002248 |
| O  | 4.548725  | 7.599326  | 0.738431 | -0.004068 | 0.011781  | 0.002247  |
| O  | -2.095583 | 6.202275  | 5.628359 | 0.004052  | -0.011730 | -0.002262 |
| O  | -2.459230 | 13.184059 | 5.445139 | 0.009419  | 0.007392  | -0.002752 |
| O  | 4.912372  | 0.617542  | 0.921651 | -0.009376 | -0.007377 | 0.002741  |
| O  | 2.757943  | 6.283259  | 4.105046 | 0.009374  | -0.007369 | -0.002738 |
| O  | -0.304801 | 7.518342  | 2.261744 | -0.009420 | 0.007397  | 0.002754  |
| O  | -0.175430 | 2.374756  | 0.744070 | 0.017521  | -0.009728 | 0.032825  |
| O  | 2.628573  | 11.426844 | 5.622720 | -0.017682 | 0.009745  | -0.032992 |
| O  | 4.783002  | 9.275557  | 2.439325 | 0.017684  | 0.009752  | 0.033002  |
| O  | -2.329859 | 4.526044  | 3.927465 | -0.017523 | -0.009720 | -0.032812 |
| O  | -1.223866 | 12.517207 | 2.155216 | 0.000997  | 0.014125  | 0.000901  |
| O  | 3.677009  | 1.284394  | 4.211574 | -0.001028 | -0.014150 | -0.000897 |
| O  | 5.831438  | 5.616407  | 1.028179 | 0.001031  | -0.014157 | 0.000897  |
| O  | -3.378295 | 8.185194  | 5.338611 | -0.000994 | 0.014115  | -0.000903 |

|   |           |           |          |           |           |           |
|---|-----------|-----------|----------|-----------|-----------|-----------|
| H | -0.637445 | 12.195109 | 2.878812 | 0.014299  | -0.062679 | -0.040885 |
| H | 3.090587  | 1.606491  | 3.487978 | -0.014080 | 0.062789  | 0.040793  |
| H | 5.245016  | 5.294309  | 0.304583 | 0.014064  | 0.062832  | -0.040802 |
| H | -2.791874 | 8.507292  | 6.062207 | -0.014316 | -0.062653 | 0.040881  |

23 f = 31.896090 THz 200.409042 2PiTHz 1063.938999 cm-1 131.911671  
meV

|    | X         | Y         | Z        | dx        | dy        | dz        |
|----|-----------|-----------|----------|-----------|-----------|-----------|
| Li | 3.769818  | 9.645336  | 4.001386 | -0.004644 | 0.012598  | -0.010885 |
| Li | -1.316675 | 4.156264  | 2.365404 | 0.004669  | -0.012604 | 0.010900  |
| Li | -3.471104 | 2.744536  | 5.548798 | -0.004672 | -0.012602 | -0.010902 |
| Li | 5.924247  | 11.057064 | 0.817991 | 0.004640  | 0.012600  | 0.010882  |
| Na | 2.049025  | 6.784862  | 1.629696 | -0.000312 | 0.000891  | -0.000267 |
| Na | 0.404117  | 7.016739  | 4.737094 | 0.000310  | -0.000894 | 0.000269  |
| Na | 2.558546  | 13.685662 | 1.553699 | -0.000313 | -0.000892 | -0.000268 |
| Na | -0.105403 | 0.115939  | 4.813091 | 0.000309  | 0.000892  | 0.000267  |
| B  | 4.155007  | 8.978944  | 1.168663 | 0.014175  | 0.040331  | 0.045800  |
| B  | -1.701865 | 4.822656  | 5.198127 | -0.014149 | -0.040508 | -0.046063 |
| B  | 0.452564  | 2.078144  | 2.014732 | 0.014131  | -0.040317 | 0.045874  |
| B  | 2.000578  | 11.723457 | 4.352058 | -0.014193 | 0.040525  | -0.045995 |
| B  | -2.733891 | 11.746082 | 5.839177 | 0.013544  | 0.049827  | 0.028685  |
| B  | 5.187034  | 2.055518  | 0.527613 | -0.013305 | -0.049701 | -0.028762 |
| B  | 3.032605  | 4.845282  | 3.711007 | 0.013462  | -0.049864 | 0.028747  |
| B  | -0.579463 | 8.956318  | 2.655782 | -0.013400 | 0.049660  | -0.028717 |
| B  | -0.983708 | 0.054306  | 1.827988 | -0.000821 | -0.011860 | 0.004245  |
| B  | 3.436850  | 13.747295 | 4.538802 | 0.000756  | 0.011778  | -0.004248 |
| B  | 5.591279  | 6.955106  | 1.355407 | -0.000776 | 0.011861  | 0.004282  |
| B  | -3.138137 | 6.846495  | 5.011383 | 0.000795  | -0.011778 | -0.004217 |
| Si | 0.631772  | 3.486686  | 4.508512 | -0.008213 | -0.033811 | -0.013375 |
| Si | 1.821370  | 10.314915 | 1.858278 | 0.008207  | 0.033813  | 0.013349  |
| Si | -0.333059 | 10.387486 | 5.041673 | -0.008207 | 0.033810  | -0.013339 |
| Si | 2.786201  | 3.414115  | 1.325117 | 0.008202  | -0.033815 | 0.013378  |
| O  | 0.061445  | 3.072947  | 3.041906 | 0.000000  | 0.022788  | 0.022608  |
| O  | 2.391697  | 10.728653 | 3.324884 | -0.000014 | -0.022792 | -0.022576 |
| O  | 4.546126  | 9.973747  | 0.141489 | 0.000019  | -0.022774 | 0.022589  |
| O  | -2.092984 | 3.827853  | 6.225301 | 0.000007  | 0.022799  | -0.022578 |

|   |           |           |          |           |           |           |
|---|-----------|-----------|----------|-----------|-----------|-----------|
| O | 2.197450  | 3.933608  | 4.519003 | 0.033584  | 0.028470  | -0.011741 |
| O | 0.255692  | 9.867992  | 1.847787 | -0.033555 | -0.028438 | 0.011738  |
| O | -1.898737 | 10.834409 | 5.031182 | 0.033519  | -0.028442 | -0.011737 |
| O | 4.351879  | 2.967192  | 1.335608 | -0.033605 | 0.028460  | 0.011741  |
| O | -0.212316 | 4.798696  | 5.055280 | -0.023031 | 0.028572  | 0.015508  |
| O | 2.665458  | 9.002905  | 1.311510 | 0.022984  | -0.028553 | -0.015473 |
| O | 0.511030  | 11.699496 | 4.494905 | -0.022960 | -0.028560 | 0.015482  |
| O | 1.942113  | 2.102105  | 1.871885 | 0.023063  | 0.028570  | -0.015501 |
| O | 0.525580  | 2.169271  | 5.472081 | 0.003069  | 0.017558  | 0.000104  |
| O | 1.927562  | 11.632329 | 0.894709 | -0.003101 | -0.017599 | -0.000068 |
| O | -0.226867 | 9.070071  | 4.078104 | 0.003080  | -0.017588 | 0.000047  |
| O | 2.680009  | 4.731529  | 2.288686 | -0.003090 | 0.017568  | -0.000126 |
| O | 0.058846  | 0.698526  | 2.444964 | -0.001930 | 0.005511  | -0.005105 |
| O | 2.394296  | 13.103075 | 3.921826 | 0.001870  | -0.005619 | 0.005113  |
| O | 4.548725  | 7.599326  | 0.738431 | -0.001959 | -0.005512 | -0.005135 |
| O | -2.095583 | 6.202275  | 5.628359 | 0.001843  | 0.005619  | 0.005087  |
| O | -2.459230 | 13.184059 | 5.445139 | 0.002436  | -0.017440 | 0.008093  |
| O | 4.912372  | 0.617542  | 0.921651 | -0.002385 | 0.017333  | -0.008004 |
| O | 2.757943  | 6.283259  | 4.105046 | 0.002436  | 0.017416  | 0.008074  |
| O | -0.304801 | 7.518342  | 2.261744 | -0.002385 | -0.017354 | -0.008020 |
| O | -0.175430 | 2.374756  | 0.744070 | 0.000591  | 0.013839  | -0.022592 |
| O | 2.628573  | 11.426844 | 5.622720 | -0.000682 | -0.013893 | 0.022607  |
| O | 4.783002  | 9.275557  | 2.439325 | 0.000653  | -0.013825 | -0.022527 |
| O | -2.329859 | 4.526044  | 3.927465 | -0.000636 | 0.013906  | 0.022661  |
| O | -1.223866 | 12.517207 | 2.155216 | 0.007669  | 0.006604  | 0.005231  |
| O | 3.677009  | 1.284394  | 4.211574 | -0.007639 | -0.006500 | -0.005273 |
| O | 5.831438  | 5.616407  | 1.028179 | 0.007670  | -0.006613 | 0.005250  |
| O | -3.378295 | 8.185194  | 5.338611 | -0.007635 | 0.006490  | -0.005254 |
| H | -0.637445 | 12.195109 | 2.878812 | -0.026193 | -0.155003 | -0.041462 |
| H | 3.090587  | 1.606491  | 3.487978 | 0.026142  | 0.155405  | 0.041619  |
| H | 5.245016  | 5.294309  | 0.304583 | -0.026204 | 0.155347  | -0.041600 |
| H | -2.791874 | 8.507292  | 6.062207 | 0.026129  | -0.155067 | 0.041488  |

24 f = 31.781316 THz 199.687900 2PiTHz 1060.110570 cm-1 131.437006  
meV

X Y Z dx dy dz

|    |           |           |          |           |           |           |
|----|-----------|-----------|----------|-----------|-----------|-----------|
| Li | 3.769818  | 9.645336  | 4.001386 | -0.003193 | 0.002227  | -0.001805 |
| Li | -1.316675 | 4.156264  | 2.365404 | -0.003212 | 0.002191  | -0.001808 |
| Li | -3.471104 | 2.744536  | 5.548798 | -0.003232 | -0.002227 | -0.001839 |
| Li | 5.924247  | 11.057064 | 0.817991 | -0.003174 | -0.002191 | -0.001776 |
| Na | 2.049025  | 6.784862  | 1.629696 | 0.000279  | 0.001841  | -0.000135 |
| Na | 0.404117  | 7.016739  | 4.737094 | 0.000281  | 0.001841  | -0.000139 |
| Na | 2.558546  | 13.685662 | 1.553699 | 0.000279  | -0.001845 | -0.000140 |
| Na | -0.105403 | 0.115939  | 4.813091 | 0.000281  | -0.001837 | -0.000134 |
| B  | 4.155007  | 8.978944  | 1.168663 | -0.005596 | 0.071700  | 0.051695  |
| B  | -1.701865 | 4.822656  | 5.198127 | -0.005742 | 0.071648  | 0.051440  |
| B  | 0.452564  | 2.078144  | 2.014732 | -0.005724 | -0.071736 | 0.051570  |
| B  | 2.000578  | 11.723457 | 4.352058 | -0.005621 | -0.071608 | 0.051562  |
| B  | -2.733891 | 11.746082 | 5.839177 | -0.058208 | -0.056520 | 0.011734  |
| B  | 5.187034  | 2.055518  | 0.527613 | -0.058517 | -0.056651 | 0.011492  |
| B  | 3.032605  | 4.845282  | 3.711007 | -0.058489 | 0.056508  | 0.011600  |
| B  | -0.579463 | 8.956318  | 2.655782 | -0.058245 | 0.056660  | 0.011632  |
| B  | -0.983708 | 0.054306  | 1.827988 | 0.010472  | 0.024211  | -0.001936 |
| B  | 3.436850  | 13.747295 | 4.538802 | 0.010367  | 0.024240  | -0.002035 |
| B  | 5.591279  | 6.955106  | 1.355407 | 0.010370  | -0.024199 | -0.002017 |
| B  | -3.138137 | 6.846495  | 5.011383 | 0.010468  | -0.024251 | -0.001953 |
| Si | 0.631772  | 3.486686  | 4.508512 | 0.009254  | -0.001761 | 0.004221  |
| Si | 1.821370  | 10.314915 | 1.858278 | 0.009162  | -0.001626 | 0.004159  |
| Si | -0.333059 | 10.387486 | 5.041673 | 0.009128  | 0.001730  | 0.004124  |
| Si | 2.786201  | 3.414115  | 1.325117 | 0.009283  | 0.001662  | 0.004254  |
| O  | 0.061445  | 3.072947  | 3.041906 | -0.004137 | 0.004750  | -0.009305 |
| O  | 2.391697  | 10.728653 | 3.324884 | -0.004101 | 0.004753  | -0.009196 |
| O  | 4.546126  | 9.973747  | 0.141489 | -0.004101 | -0.004810 | -0.009138 |
| O  | -2.092984 | 3.827853  | 6.225301 | -0.004135 | -0.004697 | -0.009354 |
| O  | 2.197450  | 3.933608  | 4.519003 | -0.006227 | -0.010042 | 0.003001  |
| O  | 0.255692  | 9.867992  | 1.847787 | -0.006220 | -0.010090 | 0.003014  |
| O  | -1.898737 | 10.834409 | 5.031182 | -0.006092 | 0.009995  | 0.002977  |
| O  | 4.351879  | 2.967192  | 1.335608 | -0.006351 | 0.010135  | 0.003040  |
| O  | -0.212316 | 4.798696  | 5.055280 | -0.005979 | -0.008271 | -0.005862 |
| O  | 2.665458  | 9.002905  | 1.311510 | -0.005811 | -0.008385 | -0.005923 |
| O  | 0.511030  | 11.699496 | 4.494905 | -0.005889 | 0.008305  | -0.005873 |
| O  | 1.942113  | 2.102105  | 1.871885 | -0.005898 | 0.008351  | -0.005913 |

|   |           |           |          |           |           |           |
|---|-----------|-----------|----------|-----------|-----------|-----------|
| O | 0.525580  | 2.169271  | 5.472081 | 0.005014  | 0.013788  | -0.007939 |
| O | 1.927562  | 11.632329 | 0.894709 | 0.005006  | 0.013666  | -0.007874 |
| O | -0.226867 | 9.070071  | 4.078104 | 0.005017  | -0.013727 | -0.007873 |
| O | 2.680009  | 4.731529  | 2.288686 | 0.005004  | -0.013731 | -0.007947 |
| O | 0.058846  | 0.698526  | 2.444964 | 0.016238  | 0.032827  | -0.004689 |
| O | 2.394296  | 13.103075 | 3.921826 | 0.016255  | 0.032797  | -0.004654 |
| O | 4.548725  | 7.599326  | 0.738431 | 0.016248  | -0.032804 | -0.004666 |
| O | -2.095583 | 6.202275  | 5.628359 | 0.016243  | -0.032821 | -0.004680 |
| O | -2.459230 | 13.184059 | 5.445139 | -0.003634 | 0.021809  | -0.013811 |
| O | 4.912372  | 0.617542  | 0.921651 | -0.003665 | 0.021818  | -0.013840 |
| O | 2.757943  | 6.283259  | 4.105046 | -0.003654 | -0.021776 | -0.013818 |
| O | -0.304801 | 7.518342  | 2.261744 | -0.003641 | -0.021845 | -0.013827 |
| O | -0.175430 | 2.374756  | 0.744070 | 0.026864  | 0.021017  | -0.016298 |
| O | 2.628573  | 11.426844 | 5.622720 | 0.026571  | 0.020961  | -0.016392 |
| O | 4.783002  | 9.275557  | 2.439325 | 0.026588  | -0.021001 | -0.016467 |
| O | -2.329859 | 4.526044  | 3.927465 | 0.026851  | -0.020979 | -0.016228 |
| O | -1.223866 | 12.517207 | 2.155216 | -0.007775 | -0.028912 | 0.006700  |
| O | 3.677009  | 1.284394  | 4.211574 | -0.007782 | -0.028931 | 0.006691  |
| O | 5.831438  | 5.616407  | 1.028179 | -0.007766 | 0.028912  | 0.006704  |
| O | -3.378295 | 8.185194  | 5.338611 | -0.007794 | 0.028930  | 0.006684  |
| H | -0.637445 | 12.195109 | 2.878812 | 0.011161  | 0.005468  | 0.007789  |
| H | 3.090587  | 1.606491  | 3.487978 | 0.011219  | 0.006013  | 0.007972  |
| H | 5.245016  | 5.294309  | 0.304583 | 0.011171  | -0.005602 | 0.007840  |
| H | -2.791874 | 8.507292  | 6.062207 | 0.011233  | -0.005911 | 0.007913  |

25 f = 31.530527 THz 198.112145 2PiTHz 1051.745144 cm-1 130.399825  
meV

|    | X         | Y         | Z        | dx        | dy        | dz        |
|----|-----------|-----------|----------|-----------|-----------|-----------|
| Li | 3.769818  | 9.645336  | 4.001386 | -0.007973 | -0.000452 | -0.006691 |
| Li | -1.316675 | 4.156264  | 2.365404 | 0.007956  | 0.000462  | 0.006678  |
| Li | -3.471104 | 2.744536  | 5.548798 | 0.007957  | -0.000459 | 0.006683  |
| Li | 5.924247  | 11.057064 | 0.817991 | -0.007974 | 0.000451  | -0.006690 |
| Na | 2.049025  | 6.784862  | 1.629696 | -0.000052 | 0.000820  | -0.000463 |
| Na | 0.404117  | 7.016739  | 4.737094 | 0.000054  | -0.000812 | 0.000460  |
| Na | 2.558546  | 13.685662 | 1.553699 | 0.000054  | 0.000813  | 0.000460  |
| Na | -0.105403 | 0.115939  | 4.813091 | -0.000052 | -0.000820 | -0.000463 |

|    |           |           |          |           |           |           |
|----|-----------|-----------|----------|-----------|-----------|-----------|
| B  | 4.155007  | 8.978944  | 1.168663 | -0.026693 | 0.002234  | -0.033548 |
| B  | -1.701865 | 4.822656  | 5.198127 | 0.026659  | -0.001922 | 0.033732  |
| B  | 0.452564  | 2.078144  | 2.014732 | 0.026638  | 0.001919  | 0.033728  |
| B  | 2.000578  | 11.723457 | 4.352058 | -0.026711 | -0.002249 | -0.033547 |
| B  | -2.733891 | 11.746082 | 5.839177 | -0.051980 | 0.004115  | -0.027208 |
| B  | 5.187034  | 2.055518  | 0.527613 | 0.051694  | -0.004380 | 0.027254  |
| B  | 3.032605  | 4.845282  | 3.711007 | 0.051702  | 0.004382  | 0.027239  |
| B  | -0.579463 | 8.956318  | 2.655782 | -0.051964 | -0.004129 | -0.027205 |
| B  | -0.983708 | 0.054306  | 1.827988 | -0.021801 | -0.001785 | -0.017233 |
| B  | 3.436850  | 13.747295 | 4.538802 | 0.021870  | 0.001884  | 0.017241  |
| B  | 5.591279  | 6.955106  | 1.355407 | 0.021865  | -0.001888 | 0.017236  |
| B  | -3.138137 | 6.846495  | 5.011383 | -0.021804 | 0.001784  | -0.017235 |
| Si | 0.631772  | 3.486686  | 4.508512 | -0.027111 | 0.008588  | -0.021895 |
| Si | 1.821370  | 10.314915 | 1.858278 | 0.027163  | -0.008595 | 0.021927  |
| Si | -0.333059 | 10.387486 | 5.041673 | 0.027170  | 0.008590  | 0.021924  |
| Si | 2.786201  | 3.414115  | 1.325117 | -0.027104 | -0.008581 | -0.021897 |
| O  | 0.061445  | 3.072947  | 3.041906 | 0.006607  | 0.013317  | 0.034303  |
| O  | 2.391697  | 10.728653 | 3.324884 | -0.006625 | -0.013306 | -0.034363 |
| O  | 4.546126  | 9.973747  | 0.141489 | -0.006627 | 0.013308  | -0.034362 |
| O  | -2.092984 | 3.827853  | 6.225301 | 0.006604  | -0.013322 | 0.034306  |
| O  | 2.197450  | 3.933608  | 4.519003 | 0.028856  | 0.012224  | -0.008373 |
| O  | 0.255692  | 9.867992  | 1.847787 | -0.028897 | -0.012280 | 0.008392  |
| O  | -1.898737 | 10.834409 | 5.031182 | -0.028913 | 0.012289  | 0.008399  |
| O  | 4.351879  | 2.967192  | 1.335608 | 0.028849  | -0.012225 | -0.008375 |
| O  | -0.212316 | 4.798696  | 5.055280 | 0.020010  | -0.009780 | -0.003378 |
| O  | 2.665458  | 9.002905  | 1.311510 | -0.020041 | 0.009756  | 0.003359  |
| O  | 0.511030  | 11.699496 | 4.494905 | -0.020039 | -0.009749 | 0.003356  |
| O  | 1.942113  | 2.102105  | 1.871885 | 0.020008  | 0.009777  | -0.003378 |
| O  | 0.525580  | 2.169271  | 5.472081 | 0.002100  | -0.014921 | 0.020716  |
| O  | 1.927562  | 11.632329 | 0.894709 | -0.002083 | 0.014982  | -0.020765 |
| O  | -0.226867 | 9.070071  | 4.078104 | -0.002083 | -0.014980 | -0.020762 |
| O  | 2.680009  | 4.731529  | 2.288686 | 0.002100  | 0.014914  | 0.020718  |
| O  | 0.058846  | 0.698526  | 2.444964 | 0.004964  | -0.003981 | 0.006903  |
| O  | 2.394296  | 13.103075 | 3.921826 | -0.004887 | 0.004139  | -0.006923 |
| O  | 4.548725  | 7.599326  | 0.738431 | -0.004888 | -0.004134 | -0.006922 |
| O  | -2.095583 | 6.202275  | 5.628359 | 0.004959  | 0.003986  | 0.006902  |



|   |           |           |          |           |           |           |
|---|-----------|-----------|----------|-----------|-----------|-----------|
| O | -2.459230 | 13.184059 | 5.445139 | -0.002731 | -0.008209 | 0.001411  |
| O | 4.912372  | 0.617542  | 0.921651 | 0.002693  | 0.008322  | -0.001499 |
| O | 2.757943  | 6.283259  | 4.105046 | 0.002697  | -0.008320 | -0.001492 |
| O | -0.304801 | 7.518342  | 2.261744 | -0.002726 | 0.008218  | 0.001419  |
| O | -0.175430 | 2.374756  | 0.744070 | -0.059326 | -0.000435 | -0.043243 |
| O | 2.628573  | 11.426844 | 5.622720 | 0.059496  | 0.000524  | 0.043213  |
| O | 4.783002  | 9.275557  | 2.439325 | 0.059475  | -0.000520 | 0.043209  |
| O | -2.329859 | 4.526044  | 3.927465 | -0.059341 | 0.000433  | -0.043242 |
| O | -1.223866 | 12.517207 | 2.155216 | 0.002804  | -0.001119 | 0.002078  |
| O | 3.677009  | 1.284394  | 4.211574 | -0.002832 | 0.000995  | -0.002038 |
| O | 5.831438  | 5.616407  | 1.028179 | -0.002834 | -0.000994 | -0.002042 |
| O | -3.378295 | 8.185194  | 5.338611 | 0.002805  | 0.001116  | 0.002077  |
| H | -0.637445 | 12.195109 | 2.878812 | -0.004901 | 0.008304  | 0.009408  |
| H | 3.090587  | 1.606491  | 3.487978 | 0.004942  | -0.008474 | -0.009444 |
| H | 5.245016  | 5.294309  | 0.304583 | 0.004947  | 0.008407  | -0.009422 |
| H | -2.791874 | 8.507292  | 6.062207 | -0.004902 | -0.008311 | 0.009411  |

26 f = 31.234252 THz 196.250593 2PiTHz 1041.862465 cm-1 129.174529 meV

|    | X         | Y         | Z        | dx        | dy        | dz        |
|----|-----------|-----------|----------|-----------|-----------|-----------|
| Li | 3.769818  | 9.645336  | 4.001386 | 0.005213  | -0.001513 | 0.003180  |
| Li | -1.316675 | 4.156264  | 2.365404 | 0.005223  | -0.001531 | 0.003198  |
| Li | -3.471104 | 2.744536  | 5.548798 | 0.005213  | 0.001521  | 0.003186  |
| Li | 5.924247  | 11.057064 | 0.817991 | 0.005208  | 0.001522  | 0.003185  |
| Na | 2.049025  | 6.784862  | 1.629696 | -0.000223 | 0.000463  | -0.000699 |
| Na | 0.404117  | 7.016739  | 4.737094 | -0.000222 | 0.000461  | -0.000701 |
| Na | 2.558546  | 13.685662 | 1.553699 | -0.000222 | -0.000462 | -0.000701 |
| Na | -0.105403 | 0.115939  | 4.813091 | -0.000223 | -0.000462 | -0.000699 |
| B  | 4.155007  | 8.978944  | 1.168663 | 0.024070  | 0.012270  | 0.044018  |
| B  | -1.701865 | 4.822656  | 5.198127 | 0.024104  | 0.012138  | 0.043948  |
| B  | 0.452564  | 2.078144  | 2.014732 | 0.024083  | -0.012169 | 0.043997  |
| B  | 2.000578  | 11.723457 | 4.352058 | 0.024099  | -0.012225 | 0.044020  |
| B  | -2.733891 | 11.746082 | 5.839177 | 0.039046  | -0.005736 | 0.034826  |
| B  | 5.187034  | 2.055518  | 0.527613 | 0.039105  | -0.005724 | 0.034808  |
| B  | 3.032605  | 4.845282  | 3.711007 | 0.039077  | 0.005673  | 0.034818  |
| B  | -0.579463 | 8.956318  | 2.655782 | 0.038994  | 0.005772  | 0.034838  |

|    |           |           |          |           |           |           |
|----|-----------|-----------|----------|-----------|-----------|-----------|
| B  | -0.983708 | 0.054306  | 1.827988 | -0.023706 | 0.003109  | -0.019660 |
| B  | 3.436850  | 13.747295 | 4.538802 | -0.023700 | 0.003118  | -0.019657 |
| B  | 5.591279  | 6.955106  | 1.355407 | -0.023677 | -0.003111 | -0.019637 |
| B  | -3.138137 | 6.846495  | 5.011383 | -0.023703 | -0.003121 | -0.019660 |
| Si | 0.631772  | 3.486686  | 4.508512 | -0.021904 | 0.007952  | -0.020547 |
| Si | 1.821370  | 10.314915 | 1.858278 | -0.021851 | 0.007974  | -0.020517 |
| Si | -0.333059 | 10.387486 | 5.041673 | -0.021873 | -0.007956 | -0.020506 |
| Si | 2.786201  | 3.414115  | 1.325117 | -0.021891 | -0.007968 | -0.020524 |
| O  | 0.061445  | 3.072947  | 3.041906 | 0.005646  | 0.012378  | 0.030786  |
| O  | 2.391697  | 10.728653 | 3.324884 | 0.005624  | 0.012362  | 0.030731  |
| O  | 4.546126  | 9.973747  | 0.141489 | 0.005631  | -0.012368 | 0.030736  |
| O  | -2.092984 | 3.827853  | 6.225301 | 0.005640  | -0.012363 | 0.030760  |
| O  | 2.197450  | 3.933608  | 4.519003 | 0.027428  | 0.011715  | -0.009204 |
| O  | 0.255692  | 9.867992  | 1.847787 | 0.027339  | 0.011669  | -0.009188 |
| O  | -1.898737 | 10.834409 | 5.031182 | 0.027372  | -0.011689 | -0.009198 |
| O  | 4.351879  | 2.967192  | 1.335608 | 0.027381  | -0.011687 | -0.009196 |
| O  | -0.212316 | 4.798696  | 5.055280 | 0.014845  | -0.007176 | -0.002944 |
| O  | 2.665458  | 9.002905  | 1.311510 | 0.014842  | -0.007208 | -0.002962 |
| O  | 0.511030  | 11.699496 | 4.494905 | 0.014851  | 0.007206  | -0.002962 |
| O  | 1.942113  | 2.102105  | 1.871885 | 0.014877  | 0.007193  | -0.002958 |
| O  | 0.525580  | 2.169271  | 5.472081 | 0.002103  | -0.014071 | 0.017366  |
| O  | 1.927562  | 11.632329 | 0.894709 | 0.002104  | -0.014067 | 0.017351  |
| O  | -0.226867 | 9.070071  | 4.078104 | 0.002106  | 0.014041  | 0.017314  |
| O  | 2.680009  | 4.731529  | 2.288686 | 0.002104  | 0.014067  | 0.017352  |
| O  | 0.058846  | 0.698526  | 2.444964 | 0.014903  | 0.009834  | 0.008470  |
| O  | 2.394296  | 13.103075 | 3.921826 | 0.014909  | 0.009861  | 0.008467  |
| O  | 4.548725  | 7.599326  | 0.738431 | 0.014922  | -0.009877 | 0.008469  |
| O  | -2.095583 | 6.202275  | 5.628359 | 0.014881  | -0.009819 | 0.008461  |
| O  | -2.459230 | 13.184059 | 5.445139 | 0.004931  | 0.005151  | -0.000518 |
| O  | 4.912372  | 0.617542  | 0.921651 | 0.004936  | 0.005139  | -0.000504 |
| O  | 2.757943  | 6.283259  | 4.105046 | 0.004955  | -0.005116 | -0.000481 |
| O  | -0.304801 | 7.518342  | 2.261744 | 0.004910  | -0.005167 | -0.000542 |
| O  | -0.175430 | 2.374756  | 0.744070 | -0.053642 | 0.002091  | -0.046415 |
| O  | 2.628573  | 11.426844 | 5.622720 | -0.053609 | 0.002106  | -0.046409 |
| O  | 4.783002  | 9.275557  | 2.439325 | -0.053557 | -0.002121 | -0.046399 |
| O  | -2.329859 | 4.526044  | 3.927465 | -0.053632 | -0.002082 | -0.046379 |

|   |           |           |          |           |           |           |
|---|-----------|-----------|----------|-----------|-----------|-----------|
| O | -1.223866 | 12.517207 | 2.155216 | -0.008805 | -0.014376 | -0.003282 |
| O | 3.677009  | 1.284394  | 4.211574 | -0.008807 | -0.014389 | -0.003280 |
| O | 5.831438  | 5.616407  | 1.028179 | -0.008803 | 0.014393  | -0.003274 |
| O | -3.378295 | 8.185194  | 5.338611 | -0.008808 | 0.014366  | -0.003287 |
| H | -0.637445 | 12.195109 | 2.878812 | 0.038076  | 0.114452  | 0.022968  |
| H | 3.090587  | 1.606491  | 3.487978 | 0.038070  | 0.114440  | 0.022979  |
| H | 5.245016  | 5.294309  | 0.304583 | 0.038048  | -0.114254 | 0.022926  |
| H | -2.791874 | 8.507292  | 6.062207 | 0.038115  | -0.114584 | 0.022981  |

27 f = 31.153251 THz 195.741651 2PiTHz 1039.160575 cm-1 128.839537 meV

|    | X         | Y         | Z        | dx        | dy        | dz        |
|----|-----------|-----------|----------|-----------|-----------|-----------|
| Li | 3.769818  | 9.645336  | 4.001386 | -0.013094 | 0.001434  | -0.006709 |
| Li | -1.316675 | 4.156264  | 2.365404 | -0.013076 | 0.001422  | -0.006704 |
| Li | -3.471104 | 2.744536  | 5.548798 | 0.013076  | 0.001420  | 0.006701  |
| Li | 5.924247  | 11.057064 | 0.817991 | 0.013100  | 0.001438  | 0.006715  |
| Na | 2.049025  | 6.784862  | 1.629696 | 0.000124  | 0.000357  | -0.000264 |
| Na | 0.404117  | 7.016739  | 4.737094 | 0.000126  | 0.000357  | -0.000268 |
| Na | 2.558546  | 13.685662 | 1.553699 | -0.000126 | 0.000356  | 0.000267  |
| Na | -0.105403 | 0.115939  | 4.813091 | -0.000124 | 0.000357  | 0.000264  |
| B  | 4.155007  | 8.978944  | 1.168663 | 0.007905  | -0.019664 | 0.028355  |
| B  | -1.701865 | 4.822656  | 5.198127 | 0.007846  | -0.019647 | 0.028262  |
| B  | 0.452564  | 2.078144  | 2.014732 | -0.007839 | -0.019687 | -0.028229 |
| B  | 2.000578  | 11.723457 | 4.352058 | -0.007883 | -0.019642 | -0.028331 |
| B  | -2.733891 | 11.746082 | 5.839177 | -0.073945 | 0.006865  | 0.027810  |
| B  | 5.187034  | 2.055518  | 0.527613 | -0.073884 | 0.006809  | 0.027762  |
| B  | 3.032605  | 4.845282  | 3.711007 | 0.073885  | 0.006837  | -0.027740 |
| B  | -0.579463 | 8.956318  | 2.655782 | 0.073984  | 0.006847  | -0.027787 |
| B  | -0.983708 | 0.054306  | 1.827988 | 0.021726  | 0.001623  | 0.017934  |
| B  | 3.436850  | 13.747295 | 4.538802 | 0.021758  | 0.001645  | 0.017950  |
| B  | 5.591279  | 6.955106  | 1.355407 | -0.021779 | 0.001648  | -0.017964 |
| B  | -3.138137 | 6.846495  | 5.011383 | -0.021732 | 0.001615  | -0.017943 |
| Si | 0.631772  | 3.486686  | 4.508512 | -0.014967 | -0.004093 | 0.024762  |
| Si | 1.821370  | 10.314915 | 1.858278 | -0.014973 | -0.004041 | 0.024816  |
| Si | -0.333059 | 10.387486 | 5.041673 | 0.014953  | -0.004046 | -0.024831 |
| Si | 2.786201  | 3.414115  | 1.325117 | 0.014962  | -0.004097 | -0.024771 |

|   |           |           |          |           |           |           |
|---|-----------|-----------|----------|-----------|-----------|-----------|
| O | 0.061445  | 3.072947  | 3.041906 | 0.003348  | -0.004990 | -0.011473 |
| O | 2.391697  | 10.728653 | 3.324884 | 0.003353  | -0.005042 | -0.011543 |
| O | 4.546126  | 9.973747  | 0.141489 | -0.003352 | -0.005050 | 0.011564  |
| O | -2.092984 | 3.827853  | 6.225301 | -0.003342 | -0.004997 | 0.011489  |
| O | 2.197450  | 3.933608  | 4.519003 | -0.002722 | -0.003050 | 0.000769  |
| O | 0.255692  | 9.867992  | 1.847787 | -0.002776 | -0.003092 | 0.000781  |
| O | -1.898737 | 10.834409 | 5.031182 | 0.002800  | -0.003103 | -0.000788 |
| O | 4.351879  | 2.967192  | 1.335608 | 0.002732  | -0.003054 | -0.000773 |
| O | -0.212316 | 4.798696  | 5.055280 | 0.030616  | -0.011877 | -0.009643 |
| O | 2.665458  | 9.002905  | 1.311510 | 0.030707  | -0.011932 | -0.009676 |
| O | 0.511030  | 11.699496 | 4.494905 | -0.030692 | -0.011929 | 0.009675  |
| O | 1.942113  | 2.102105  | 1.871885 | -0.030614 | -0.011873 | 0.009641  |
| O | 0.525580  | 2.169271  | 5.472081 | 0.003350  | 0.026062  | -0.044984 |
| O | 1.927562  | 11.632329 | 0.894709 | 0.003351  | 0.026066  | -0.045021 |
| O | -0.226867 | 9.070071  | 4.078104 | -0.003348 | 0.026073  | 0.045030  |
| O | 2.680009  | 4.731529  | 2.288686 | -0.003350 | 0.026070  | 0.044993  |
| O | 0.058846  | 0.698526  | 2.444964 | -0.003001 | 0.007041  | -0.006550 |
| O | 2.394296  | 13.103075 | 3.921826 | -0.003007 | 0.007039  | -0.006553 |
| O | 4.548725  | 7.599326  | 0.738431 | 0.003006  | 0.007051  | 0.006558  |
| O | -2.095583 | 6.202275  | 5.628359 | 0.003021  | 0.007019  | 0.006555  |
| O | -2.459230 | 13.184059 | 5.445139 | -0.004035 | -0.000615 | -0.007180 |
| O | 4.912372  | 0.617542  | 0.921651 | -0.004030 | -0.000602 | -0.007185 |
| O | 2.757943  | 6.283259  | 4.105046 | 0.004025  | -0.000624 | 0.007170  |
| O | -0.304801 | 7.518342  | 2.261744 | 0.004047  | -0.000600 | 0.007192  |
| O | -0.175430 | 2.374756  | 0.744070 | 0.053400  | 0.004769  | 0.027102  |
| O | 2.628573  | 11.426844 | 5.622720 | 0.053473  | 0.004754  | 0.027187  |
| O | 4.783002  | 9.275557  | 2.439325 | -0.053515 | 0.004757  | -0.027218 |
| O | -2.329859 | 4.526044  | 3.927465 | -0.053419 | 0.004759  | -0.027124 |
| O | -1.223866 | 12.517207 | 2.155216 | -0.001032 | 0.000912  | 0.003148  |
| O | 3.677009  | 1.284394  | 4.211574 | -0.001031 | 0.000905  | 0.003144  |
| O | 5.831438  | 5.616407  | 1.028179 | 0.001028  | 0.000899  | -0.003150 |
| O | -3.378295 | 8.185194  | 5.338611 | 0.001025  | 0.000935  | -0.003145 |
| H | -0.637445 | 12.195109 | 2.878812 | 0.022009  | -0.073432 | -0.049950 |
| H | 3.090587  | 1.606491  | 3.487978 | 0.021989  | -0.073301 | -0.049860 |
| H | 5.245016  | 5.294309  | 0.304583 | -0.021959 | -0.073428 | 0.049883  |
| H | -2.791874 | 8.507292  | 6.062207 | -0.021998 | -0.073437 | 0.049957  |

28 f = 30.994260 THz 194.742682 2PiTHz 1033.857214 cm-1 128.182004  
meV

|    | X         | Y         | Z        | dx        | dy        | dz        |
|----|-----------|-----------|----------|-----------|-----------|-----------|
| Li | 3.769818  | 9.645336  | 4.001386 | -0.011037 | -0.001073 | -0.002069 |
| Li | -1.316675 | 4.156264  | 2.365404 | 0.011053  | 0.001076  | 0.002084  |
| Li | -3.471104 | 2.744536  | 5.548798 | -0.011052 | 0.001077  | -0.002083 |
| Li | 5.924247  | 11.057064 | 0.817991 | 0.011040  | -0.001071 | 0.002072  |
| Na | 2.049025  | 6.784862  | 1.629696 | -0.000464 | 0.000455  | 0.000677  |
| Na | 0.404117  | 7.016739  | 4.737094 | 0.000463  | -0.000455 | -0.000679 |
| Na | 2.558546  | 13.685662 | 1.553699 | -0.000463 | -0.000455 | 0.000679  |
| Na | -0.105403 | 0.115939  | 4.813091 | 0.000465  | 0.000455  | -0.000677 |
| B  | 4.155007  | 8.978944  | 1.168663 | 0.002878  | -0.014616 | 0.035224  |
| B  | -1.701865 | 4.822656  | 5.198127 | -0.002904 | 0.014655  | -0.035241 |
| B  | 0.452564  | 2.078144  | 2.014732 | 0.002896  | 0.014643  | 0.035240  |
| B  | 2.000578  | 11.723457 | 4.352058 | -0.002882 | -0.014615 | -0.035226 |
| B  | -2.733891 | 11.746082 | 5.839177 | -0.068952 | 0.003437  | 0.020253  |
| B  | 5.187034  | 2.055518  | 0.527613 | 0.069068  | -0.003446 | -0.020278 |
| B  | 3.032605  | 4.845282  | 3.711007 | -0.069047 | -0.003437 | 0.020296  |
| B  | -0.579463 | 8.956318  | 2.655782 | 0.068979  | 0.003441  | -0.020232 |
| B  | -0.983708 | 0.054306  | 1.827988 | -0.023002 | 0.004292  | -0.021022 |
| B  | 3.436850  | 13.747295 | 4.538802 | 0.022980  | -0.004269 | 0.020992  |
| B  | 5.591279  | 6.955106  | 1.355407 | -0.022984 | -0.004271 | -0.020999 |
| B  | -3.138137 | 6.846495  | 5.011383 | 0.023003  | 0.004291  | 0.021019  |
| Si | 0.631772  | 3.486686  | 4.508512 | 0.015499  | 0.010437  | -0.022238 |
| Si | 1.821370  | 10.314915 | 1.858278 | -0.015464 | -0.010405 | 0.022213  |
| Si | -0.333059 | 10.387486 | 5.041673 | 0.015456  | -0.010405 | -0.022219 |
| Si | 2.786201  | 3.414115  | 1.325117 | -0.015502 | 0.010436  | 0.022235  |
| O  | 0.061445  | 3.072947  | 3.041906 | -0.002766 | 0.000453  | 0.004735  |
| O  | 2.391697  | 10.728653 | 3.324884 | 0.002747  | -0.000456 | -0.004750 |
| O  | 4.546126  | 9.973747  | 0.141489 | -0.002747 | -0.000458 | 0.004755  |
| O  | -2.092984 | 3.827853  | 6.225301 | 0.002765  | 0.000453  | -0.004734 |
| O  | 2.197450  | 3.933608  | 4.519003 | -0.002740 | -0.002608 | 0.001539  |
| O  | 0.255692  | 9.867992  | 1.847787 | 0.002710  | 0.002591  | -0.001529 |
| O  | -1.898737 | 10.834409 | 5.031182 | -0.002694 | 0.002585  | 0.001528  |
| O  | 4.351879  | 2.967192  | 1.335608 | 0.002746  | -0.002609 | -0.001538 |

|   |           |           |          |           |           |           |
|---|-----------|-----------|----------|-----------|-----------|-----------|
| O | -0.212316 | 4.798696  | 5.055280 | -0.027413 | 0.009896  | 0.008387  |
| O | 2.665458  | 9.002905  | 1.311510 | 0.027388  | -0.009890 | -0.008381 |
| O | 0.511030  | 11.699496 | 4.494905 | -0.027386 | -0.009898 | 0.008384  |
| O | 1.942113  | 2.102105  | 1.871885 | 0.027414  | 0.009889  | -0.008384 |
| O | 0.525580  | 2.169271  | 5.472081 | -0.002117 | -0.029794 | 0.047074  |
| O | 1.927562  | 11.632329 | 0.894709 | 0.002112  | 0.029738  | -0.046992 |
| O | -0.226867 | 9.070071  | 4.078104 | -0.002112 | 0.029745  | 0.046992  |
| O | 2.680009  | 4.731529  | 2.288686 | 0.002116  | -0.029788 | -0.047075 |
| O | 0.058846  | 0.698526  | 2.444964 | 0.009686  | 0.001278  | 0.008126  |
| O | 2.394296  | 13.103075 | 3.921826 | -0.009684 | -0.001282 | -0.008113 |
| O | 4.548725  | 7.599326  | 0.738431 | 0.009689  | -0.001287 | 0.008119  |
| O | -2.095583 | 6.202275  | 5.628359 | -0.009676 | 0.001264  | -0.008121 |
| O | -2.459230 | 13.184059 | 5.445139 | -0.004556 | 0.000281  | -0.006277 |
| O | 4.912372  | 0.617542  | 0.921651 | 0.004562  | -0.000272 | 0.006287  |
| O | 2.757943  | 6.283259  | 4.105046 | -0.004570 | -0.000279 | -0.006293 |
| O | -0.304801 | 7.518342  | 2.261744 | 0.004553  | 0.000278  | 0.006276  |
| O | -0.175430 | 2.374756  | 0.744070 | -0.052842 | -0.004282 | -0.029620 |
| O | 2.628573  | 11.426844 | 5.622720 | 0.052747  | 0.004269  | 0.029597  |
| O | 4.783002  | 9.275557  | 2.439325 | -0.052762 | 0.004269  | -0.029605 |
| O | -2.329859 | 4.526044  | 3.927465 | 0.052833  | -0.004280 | 0.029611  |
| O | -1.223866 | 12.517207 | 2.155216 | -0.007649 | -0.009024 | -0.001848 |
| O | 3.677009  | 1.284394  | 4.211574 | 0.007645  | 0.009015  | 0.001842  |
| O | 5.831438  | 5.616407  | 1.028179 | -0.007648 | 0.009020  | -0.001845 |
| O | -3.378295 | 8.185194  | 5.338611 | 0.007645  | -0.009016 | 0.001848  |
| H | -0.637445 | 12.195109 | 2.878812 | 0.060948  | 0.096127  | -0.008353 |
| H | 3.090587  | 1.606491  | 3.487978 | -0.060952 | -0.095994 | 0.008420  |
| H | 5.245016  | 5.294309  | 0.304583 | 0.060967  | -0.096042 | -0.008410 |
| H | -2.791874 | 8.507292  | 6.062207 | -0.060936 | 0.096130  | 0.008346  |

29 f = 30.726296 THz 193.059013 2PiTHz 1024.918887 cm-1 127.073792 meV

|    | X         | Y         | Z        | dx        | dy       | dz        |
|----|-----------|-----------|----------|-----------|----------|-----------|
| Li | 3.769818  | 9.645336  | 4.001386 | 0.000462  | 0.005335 | 0.000200  |
| Li | -1.316675 | 4.156264  | 2.365404 | 0.000511  | 0.005192 | 0.000312  |
| Li | -3.471104 | 2.744536  | 5.548798 | -0.000458 | 0.005331 | -0.000190 |
| Li | 5.924247  | 11.057064 | 0.817991 | -0.000513 | 0.005196 | -0.000320 |

|    |           |           |          |           |           |           |
|----|-----------|-----------|----------|-----------|-----------|-----------|
| Na | 2.049025  | 6.784862  | 1.629696 | -0.000003 | -0.001814 | -0.000045 |
| Na | 0.404117  | 7.016739  | 4.737094 | -0.000006 | -0.001812 | -0.000039 |
| Na | 2.558546  | 13.685662 | 1.553699 | 0.000004  | -0.001813 | 0.000036  |
| Na | -0.105403 | 0.115939  | 4.813091 | 0.000006  | -0.001813 | 0.000048  |
| B  | 4.155007  | 8.978944  | 1.168663 | 0.044820  | -0.007078 | 0.025705  |
| B  | -1.701865 | 4.822656  | 5.198127 | 0.044902  | -0.008570 | 0.024853  |
| B  | 0.452564  | 2.078144  | 2.014732 | -0.044772 | -0.007051 | -0.025740 |
| B  | 2.000578  | 11.723457 | 4.352058 | -0.044944 | -0.008585 | -0.024824 |
| B  | -2.733891 | 11.746082 | 5.839177 | 0.032381  | -0.008712 | 0.023163  |
| B  | 5.187034  | 2.055518  | 0.527613 | 0.032921  | -0.007675 | 0.022399  |
| B  | 3.032605  | 4.845282  | 3.711007 | -0.032351 | -0.008688 | -0.023163 |
| B  | -0.579463 | 8.956318  | 2.655782 | -0.032931 | -0.007702 | -0.022404 |
| B  | -0.983708 | 0.054306  | 1.827988 | 0.006167  | 0.018093  | -0.005121 |
| B  | 3.436850  | 13.747295 | 4.538802 | 0.006227  | 0.018085  | -0.005012 |
| B  | 5.591279  | 6.955106  | 1.355407 | -0.006164 | 0.018122  | 0.005133  |
| B  | -3.138137 | 6.846495  | 5.011383 | -0.006234 | 0.018057  | 0.004998  |
| Si | 0.631772  | 3.486686  | 4.508512 | 0.018537  | 0.036491  | 0.014458  |
| Si | 1.821370  | 10.314915 | 1.858278 | 0.018749  | 0.036581  | 0.014488  |
| Si | -0.333059 | 10.387486 | 5.041673 | -0.018556 | 0.036518  | -0.014461 |
| Si | 2.786201  | 3.414115  | 1.325117 | -0.018729 | 0.036549  | -0.014487 |
| O  | 0.061445  | 3.072947  | 3.041906 | -0.005009 | -0.024244 | -0.042584 |
| O  | 2.391697  | 10.728653 | 3.324884 | -0.005038 | -0.024101 | -0.042553 |
| O  | 4.546126  | 9.973747  | 0.141489 | 0.005004  | -0.024269 | 0.042624  |
| O  | -2.092984 | 3.827853  | 6.225301 | 0.005044  | -0.024074 | 0.042511  |
| O  | 2.197450  | 3.933608  | 4.519003 | -0.033534 | -0.020723 | 0.009154  |
| O  | 0.255692  | 9.867992  | 1.847787 | -0.033857 | -0.020935 | 0.009181  |
| O  | -1.898737 | 10.834409 | 5.031182 | 0.033556  | -0.020738 | -0.009168 |
| O  | 4.351879  | 2.967192  | 1.335608 | 0.033826  | -0.020915 | -0.009168 |
| O  | -0.212316 | 4.798696  | 5.055280 | 0.009796  | -0.015251 | -0.008598 |
| O  | 2.665458  | 9.002905  | 1.311510 | 0.009783  | -0.015508 | -0.008739 |
| O  | 0.511030  | 11.699496 | 4.494905 | -0.009790 | -0.015252 | 0.008596  |
| O  | 1.942113  | 2.102105  | 1.871885 | -0.009789 | -0.015510 | 0.008744  |
| O  | 0.525580  | 2.169271  | 5.472081 | -0.004438 | -0.022722 | 0.018966  |
| O  | 1.927562  | 11.632329 | 0.894709 | -0.004403 | -0.022537 | 0.018733  |
| O  | -0.226867 | 9.070071  | 4.078104 | 0.004440  | -0.022745 | -0.019002 |
| O  | 2.680009  | 4.731529  | 2.288686 | 0.004400  | -0.022506 | -0.018688 |

|   |           |           |          |           |           |           |
|---|-----------|-----------|----------|-----------|-----------|-----------|
| O | 0.058846  | 0.698526  | 2.444964 | 0.023081  | 0.022137  | 0.010493  |
| O | 2.394296  | 13.103075 | 3.921826 | 0.023577  | 0.022859  | 0.010529  |
| O | 4.548725  | 7.599326  | 0.738431 | -0.023115 | 0.022172  | -0.010503 |
| O | -2.095583 | 6.202275  | 5.628359 | -0.023544 | 0.022827  | -0.010517 |
| O | -2.459230 | 13.184059 | 5.445139 | -0.019760 | 0.023223  | -0.022646 |
| O | 4.912372  | 0.617542  | 0.921651 | -0.019411 | 0.022523  | -0.021991 |
| O | 2.757943  | 6.283259  | 4.105046 | 0.019746  | 0.023198  | 0.022626  |
| O | -0.304801 | 7.518342  | 2.261744 | 0.019425  | 0.022545  | 0.022008  |
| O | -0.175430 | 2.374756  | 0.744070 | -0.005554 | -0.000939 | 0.017889  |
| O | 2.628573  | 11.426844 | 5.622720 | -0.005345 | -0.000576 | 0.017388  |
| O | 4.783002  | 9.275557  | 2.439325 | 0.005568  | -0.000932 | -0.017884 |
| O | -2.329859 | 4.526044  | 3.927465 | 0.005320  | -0.000580 | -0.017395 |
| O | -1.223866 | 12.517207 | 2.155216 | -0.000608 | -0.023724 | 0.008290  |
| O | 3.677009  | 1.284394  | 4.211574 | -0.000556 | -0.024082 | 0.008446  |
| O | 5.831438  | 5.616407  | 1.028179 | 0.000619  | -0.023759 | -0.008292 |
| O | -3.378295 | 8.185194  | 5.338611 | 0.000546  | -0.024049 | -0.008444 |
| H | -0.637445 | 12.195109 | 2.878812 | -0.014524 | -0.045694 | 0.005061  |
| H | 3.090587  | 1.606491  | 3.487978 | -0.015182 | -0.048640 | 0.004726  |
| H | 5.245016  | 5.294309  | 0.304583 | 0.014483  | -0.045652 | -0.005069 |
| H | -2.791874 | 8.507292  | 6.062207 | 0.015223  | -0.048674 | -0.004720 |

30 f = 30.721734 THz 193.030350 2PiTHz 1024.766722 cm-1 127.054926 meV

|    | X         | Y         | Z        | dx        | dy        | dz        |
|----|-----------|-----------|----------|-----------|-----------|-----------|
| Li | 3.769818  | 9.645336  | 4.001386 | -0.002594 | 0.006630  | -0.005863 |
| Li | -1.316675 | 4.156264  | 2.365404 | 0.002561  | -0.006740 | 0.005863  |
| Li | -3.471104 | 2.744536  | 5.548798 | 0.002587  | 0.006633  | 0.005863  |
| Li | 5.924247  | 11.057064 | 0.817991 | -0.002567 | -0.006738 | -0.005863 |
| Na | 2.049025  | 6.784862  | 1.629696 | 0.000138  | -0.000045 | 0.000135  |
| Na | 0.404117  | 7.016739  | 4.737094 | -0.000138 | 0.000083  | -0.000138 |
| Na | 2.558546  | 13.685662 | 1.553699 | -0.000139 | -0.000044 | -0.000138 |
| Na | -0.105403 | 0.115939  | 4.813091 | 0.000136  | 0.000083  | 0.000135  |
| B  | 4.155007  | 8.978944  | 1.168663 | -0.006756 | 0.073010  | 0.042524  |
| B  | -1.701865 | 4.822656  | 5.198127 | 0.005689  | -0.072797 | -0.042969 |
| B  | 0.452564  | 2.078144  | 2.014732 | 0.006729  | 0.073016  | -0.042545 |
| B  | 2.000578  | 11.723457 | 4.352058 | -0.005728 | -0.072795 | 0.042937  |



|    |           |           |          |           |           |           |
|----|-----------|-----------|----------|-----------|-----------|-----------|
| B  | -2.733891 | 11.746082 | 5.839177 | -0.027732 | -0.048494 | 0.036554  |
| B  | 5.187034  | 2.055518  | 0.527613 | 0.026951  | 0.048723  | -0.037111 |
| B  | 3.032605  | 4.845282  | 3.711007 | 0.027656  | -0.048472 | -0.036574 |
| B  | -0.579463 | 8.956318  | 2.655782 | -0.027017 | 0.048739  | 0.037091  |
| B  | -0.983708 | 0.054306  | 1.827988 | -0.003280 | 0.001372  | -0.005837 |
| B  | 3.436850  | 13.747295 | 4.538802 | 0.003189  | -0.001746 | 0.005974  |
| B  | 5.591279  | 6.955106  | 1.355407 | 0.003305  | 0.001380  | 0.005863  |
| B  | -3.138137 | 6.846495  | 5.011383 | -0.003158 | -0.001741 | -0.005946 |
| Si | 0.631772  | 3.486686  | 4.508512 | -0.009605 | -0.003389 | -0.001400 |
| Si | 1.821370  | 10.314915 | 1.858278 | 0.009295  | 0.002628  | 0.001160  |
| Si | -0.333059 | 10.387486 | 5.041673 | 0.009639  | -0.003378 | 0.001419  |
| Si | 2.786201  | 3.414115  | 1.325117 | -0.009261 | 0.002637  | -0.001132 |
| O  | 0.061445  | 3.072947  | 3.041906 | 0.001634  | -0.007805 | -0.002957 |
| O  | 2.391697  | 10.728653 | 3.324884 | -0.001554 | 0.008280  | 0.003766  |
| O  | 4.546126  | 9.973747  | 0.141489 | -0.001636 | -0.007791 | 0.002922  |
| O  | -2.092984 | 3.827853  | 6.225301 | 0.001551  | 0.008298  | -0.003810 |
| O  | 2.197450  | 3.933608  | 4.519003 | 0.014637  | 0.009503  | -0.000654 |
| O  | 0.255692  | 9.867992  | 1.847787 | -0.014083 | -0.009131 | 0.000489  |
| O  | -1.898737 | 10.834409 | 5.031182 | -0.014685 | 0.009527  | 0.000671  |
| O  | 4.351879  | 2.967192  | 1.335608 | 0.014032  | -0.009107 | -0.000474 |
| O  | -0.212316 | 4.798696  | 5.055280 | 0.000541  | 0.012331  | 0.006952  |
| O  | 2.665458  | 9.002905  | 1.311510 | -0.000716 | -0.012018 | -0.006790 |
| O  | 0.511030  | 11.699496 | 4.494905 | -0.000566 | 0.012322  | -0.006948 |
| O  | 1.942113  | 2.102105  | 1.871885 | 0.000696  | -0.012026 | 0.006793  |
| O  | 0.525580  | 2.169271  | 5.472081 | -0.001768 | -0.009622 | 0.012674  |
| O  | 1.927562  | 11.632329 | 0.894709 | 0.001863  | 0.010140  | -0.013100 |
| O  | -0.226867 | 9.070071  | 4.078104 | 0.001769  | -0.009650 | -0.012702 |
| O  | 2.680009  | 4.731529  | 2.288686 | -0.001862 | 0.010109  | 0.013066  |
| O  | 0.058846  | 0.698526  | 2.444964 | -0.022979 | -0.033732 | -0.001571 |
| O  | 2.394296  | 13.103075 | 3.921826 | 0.022430  | 0.033225  | 0.001329  |
| O  | 4.548725  | 7.599326  | 0.738431 | 0.022967  | -0.033727 | 0.001557  |
| O  | -2.095583 | 6.202275  | 5.628359 | -0.022439 | 0.033227  | -0.001341 |
| O  | -2.459230 | 13.184059 | 5.445139 | -0.016335 | 0.032515  | -0.030876 |
| O  | 4.912372  | 0.617542  | 0.921651 | 0.016761  | -0.033015 | 0.031373  |
| O  | 2.757943  | 6.283259  | 4.105046 | 0.016322  | 0.032500  | 0.030859  |
| O  | -0.304801 | 7.518342  | 2.261744 | -0.016769 | -0.033023 | -0.031382 |

|   |           |           |          |           |           |           |
|---|-----------|-----------|----------|-----------|-----------|-----------|
| O | -0.175430 | 2.374756  | 0.744070 | -0.011151 | -0.017340 | 0.023786  |
| O | 2.628573  | 11.426844 | 5.622720 | 0.011330  | 0.017335  | -0.024022 |
| O | 4.783002  | 9.275557  | 2.439325 | 0.011228  | -0.017343 | -0.023747 |
| O | -2.329859 | 4.526044  | 3.927465 | -0.011241 | 0.017330  | 0.024073  |
| O | -1.223866 | 12.517207 | 2.155216 | -0.002967 | 0.016122  | -0.007605 |
| O | 3.677009  | 1.284394  | 4.211574 | 0.002993  | -0.015590 | 0.007427  |
| O | 5.831438  | 5.616407  | 1.028179 | 0.002977  | 0.016111  | 0.007610  |
| O | -3.378295 | 8.185194  | 5.338611 | -0.002982 | -0.015600 | -0.007419 |
| H | -0.637445 | 12.195109 | 2.878812 | 0.033933  | 0.145490  | 0.016719  |
| H | 3.090587  | 1.606491  | 3.487978 | -0.033663 | -0.144614 | -0.016854 |
| H | 5.245016  | 5.294309  | 0.304583 | -0.033972 | 0.145657  | -0.016762 |
| H | -2.791874 | 8.507292  | 6.062207 | 0.033619  | -0.144419 | 0.016807  |

31 f = 30.434227 THz 191.223891 2PiTHz 1015.176524 cm-1 125.865893  
meV

|    | X         | Y         | Z        | dx        | dy        | dz        |
|----|-----------|-----------|----------|-----------|-----------|-----------|
| Li | 3.769818  | 9.645336  | 4.001386 | 0.003122  | 0.001548  | -0.001919 |
| Li | -1.316675 | 4.156264  | 2.365404 | 0.003131  | 0.001535  | -0.001912 |
| Li | -3.471104 | 2.744536  | 5.548798 | -0.003129 | 0.001549  | 0.001922  |
| Li | 5.924247  | 11.057064 | 0.817991 | -0.003127 | 0.001534  | 0.001907  |
| Na | 2.049025  | 6.784862  | 1.629696 | -0.000714 | -0.000173 | 0.000141  |
| Na | 0.404117  | 7.016739  | 4.737094 | -0.000714 | -0.000173 | 0.000144  |
| Na | 2.558546  | 13.685662 | 1.553699 | 0.000714  | -0.000173 | -0.000144 |
| Na | -0.105403 | 0.115939  | 4.813091 | 0.000715  | -0.000173 | -0.000140 |
| B  | 4.155007  | 8.978944  | 1.168663 | 0.048340  | -0.030955 | -0.056576 |
| B  | -1.701865 | 4.822656  | 5.198127 | 0.048396  | -0.031096 | -0.056658 |
| B  | 0.452564  | 2.078144  | 2.014732 | -0.048400 | -0.030952 | 0.056538  |
| B  | 2.000578  | 11.723457 | 4.352058 | -0.048349 | -0.031096 | 0.056674  |
| B  | -2.733891 | 11.746082 | 5.839177 | -0.005907 | -0.034727 | 0.043299  |
| B  | 5.187034  | 2.055518  | 0.527613 | -0.005820 | -0.034641 | 0.043218  |
| B  | 3.032605  | 4.845282  | 3.711007 | 0.005863  | -0.034732 | -0.043309 |
| B  | -0.579463 | 8.956318  | 2.655782 | 0.005843  | -0.034637 | -0.043213 |
| B  | -0.983708 | 0.054306  | 1.827988 | 0.000369  | -0.000385 | -0.000222 |
| B  | 3.436850  | 13.747295 | 4.538802 | 0.000372  | -0.000403 | -0.000203 |
| B  | 5.591279  | 6.955106  | 1.355407 | -0.000371 | -0.000393 | 0.000218  |
| B  | -3.138137 | 6.846495  | 5.011383 | -0.000363 | -0.000396 | 0.000212  |

|    |           |           |          |           |           |           |
|----|-----------|-----------|----------|-----------|-----------|-----------|
| Si | 0.631772  | 3.486686  | 4.508512 | -0.024564 | -0.000973 | -0.016296 |
| Si | 1.821370  | 10.314915 | 1.858278 | -0.024565 | -0.001000 | -0.016302 |
| Si | -0.333059 | 10.387486 | 5.041673 | 0.024580  | -0.001001 | 0.016301  |
| Si | 2.786201  | 3.414115  | 1.325117 | 0.024547  | -0.000963 | 0.016302  |
| O  | 0.061445  | 3.072947  | 3.041906 | 0.013421  | 0.002741  | 0.015621  |
| O  | 2.391697  | 10.728653 | 3.324884 | 0.013430  | 0.002770  | 0.015666  |
| O  | 4.546126  | 9.973747  | 0.141489 | -0.013430 | 0.002746  | -0.015644 |
| O  | -2.092984 | 3.827853  | 6.225301 | -0.013419 | 0.002764  | -0.015640 |
| O  | 2.197450  | 3.933608  | 4.519003 | 0.041700  | 0.012880  | 0.000042  |
| O  | 0.255692  | 9.867992  | 1.847787 | 0.041696  | 0.012873  | 0.000039  |
| O  | -1.898737 | 10.834409 | 5.031182 | -0.041719 | 0.012891  | -0.000038 |
| O  | 4.351879  | 2.967192  | 1.335608 | -0.041662 | 0.012857  | -0.000043 |
| O  | -0.212316 | 4.798696  | 5.055280 | -0.016183 | 0.003434  | 0.008618  |
| O  | 2.665458  | 9.002905  | 1.311510 | -0.016163 | 0.003412  | 0.008607  |
| O  | 0.511030  | 11.699496 | 4.494905 | 0.016164  | 0.003439  | -0.008623 |
| O  | 1.942113  | 2.102105  | 1.871885 | 0.016176  | 0.003404  | -0.008602 |
| O  | 0.525580  | 2.169271  | 5.472081 | 0.001455  | -0.007153 | -0.002844 |
| O  | 1.927562  | 11.632329 | 0.894709 | 0.001464  | -0.007097 | -0.002916 |
| O  | -0.226867 | 9.070071  | 4.078104 | -0.001463 | -0.007123 | 0.002876  |
| O  | 2.680009  | 4.731529  | 2.288686 | -0.001460 | -0.007135 | 0.002873  |
| O  | 0.058846  | 0.698526  | 2.444964 | 0.026960  | 0.022078  | 0.004415  |
| O  | 2.394296  | 13.103075 | 3.921826 | 0.026982  | 0.022139  | 0.004399  |
| O  | 4.548725  | 7.599326  | 0.738431 | -0.026946 | 0.022079  | -0.004404 |
| O  | -2.095583 | 6.202275  | 5.628359 | -0.026997 | 0.022139  | -0.004410 |
| O  | -2.459230 | 13.184059 | 5.445139 | -0.015861 | 0.021836  | -0.027394 |
| O  | 4.912372  | 0.617542  | 0.921651 | -0.015835 | 0.021787  | -0.027342 |
| O  | 2.757943  | 6.283259  | 4.105046 | 0.015857  | 0.021840  | 0.027393  |
| O  | -0.304801 | 7.518342  | 2.261744 | 0.015836  | 0.021781  | 0.027339  |
| O  | -0.175430 | 2.374756  | 0.744070 | 0.013115  | 0.010058  | -0.034650 |
| O  | 2.628573  | 11.426844 | 5.622720 | 0.013150  | 0.010093  | -0.034704 |
| O  | 4.783002  | 9.275557  | 2.439325 | -0.013124 | 0.010056  | 0.034648  |
| O  | -2.329859 | 4.526044  | 3.927465 | -0.013120 | 0.010096  | 0.034723  |
| O  | -1.223866 | 12.517207 | 2.155216 | -0.002253 | -0.015502 | 0.008348  |
| O  | 3.677009  | 1.284394  | 4.211574 | -0.002239 | -0.015509 | 0.008364  |
| O  | 5.831438  | 5.616407  | 1.028179 | 0.002248  | -0.015494 | -0.008351 |
| O  | -3.378295 | 8.185194  | 5.338611 | 0.002246  | -0.015520 | -0.008359 |

|   |           |           |          |           |           |           |
|---|-----------|-----------|----------|-----------|-----------|-----------|
| H | -0.637445 | 12.195109 | 2.878812 | 0.002947  | -0.070954 | -0.020686 |
| H | 3.090587  | 1.606491  | 3.487978 | 0.002826  | -0.071355 | -0.020746 |
| H | 5.245016  | 5.294309  | 0.304583 | -0.002905 | -0.071064 | 0.020713  |
| H | -2.791874 | 8.507292  | 6.062207 | -0.002885 | -0.071209 | 0.020716  |

32 f = 30.282151 THz 190.268369 2PiTHz 1010.103815 cm-1 125.236957 meV

|    | X         | Y         | Z        | dx        | dy        | dz        |
|----|-----------|-----------|----------|-----------|-----------|-----------|
| Li | 3.769818  | 9.645336  | 4.001386 | -0.000348 | 0.002491  | -0.005873 |
| Li | -1.316675 | 4.156264  | 2.365404 | 0.000339  | -0.002494 | 0.005874  |
| Li | -3.471104 | 2.744536  | 5.548798 | -0.000342 | -0.002489 | -0.005868 |
| Li | 5.924247  | 11.057064 | 0.817991 | 0.000345  | 0.002495  | 0.005878  |
| Na | 2.049025  | 6.784862  | 1.629696 | 0.000138  | 0.000668  | 0.000109  |
| Na | 0.404117  | 7.016739  | 4.737094 | -0.000140 | -0.000672 | -0.000121 |
| Na | 2.558546  | 13.685662 | 1.553699 | 0.000140  | -0.000670 | 0.000121  |
| Na | -0.105403 | 0.115939  | 4.813091 | -0.000137 | 0.000670  | -0.000108 |
| B  | 4.155007  | 8.978944  | 1.168663 | -0.054247 | 0.041711  | 0.005026  |
| B  | -1.701865 | 4.822656  | 5.198127 | 0.054256  | -0.041710 | -0.004972 |
| B  | 0.452564  | 2.078144  | 2.014732 | -0.054278 | -0.041705 | 0.004944  |
| B  | 2.000578  | 11.723457 | 4.352058 | 0.054225  | 0.041700  | -0.005040 |
| B  | -2.733891 | 11.746082 | 5.839177 | -0.017092 | 0.040257  | -0.034266 |
| B  | 5.187034  | 2.055518  | 0.527613 | 0.017073  | -0.040263 | 0.034287  |
| B  | 3.032605  | 4.845282  | 3.711007 | -0.017083 | -0.040245 | -0.034290 |
| B  | -0.579463 | 8.956318  | 2.655782 | 0.017075  | 0.040281  | 0.034268  |
| B  | -0.983708 | 0.054306  | 1.827988 | 0.005494  | 0.010105  | 0.000347  |
| B  | 3.436850  | 13.747295 | 4.538802 | -0.005472 | -0.010102 | -0.000331 |
| B  | 5.591279  | 6.955106  | 1.355407 | 0.005479  | -0.010084 | 0.000344  |
| B  | -3.138137 | 6.846495  | 5.011383 | -0.005487 | 0.010120  | -0.000337 |
| Si | 0.631772  | 3.486686  | 4.508512 | 0.004223  | 0.019350  | 0.007560  |
| Si | 1.821370  | 10.314915 | 1.858278 | -0.004203 | -0.019326 | -0.007518 |
| Si | -0.333059 | 10.387486 | 5.041673 | 0.004212  | -0.019327 | 0.007523  |
| Si | 2.786201  | 3.414115  | 1.325117 | -0.004215 | 0.019349  | -0.007553 |
| O  | 0.061445  | 3.072947  | 3.041906 | -0.000441 | -0.013898 | -0.027230 |
| O  | 2.391697  | 10.728653 | 3.324884 | 0.000423  | 0.013871  | 0.027164  |
| O  | 4.546126  | 9.973747  | 0.141489 | -0.000427 | 0.013871  | -0.027174 |
| O  | -2.092984 | 3.827853  | 6.225301 | 0.000438  | -0.013895 | 0.027217  |

|   |           |           |          |           |           |           |
|---|-----------|-----------|----------|-----------|-----------|-----------|
| O | 2.197450  | 3.933608  | 4.519003 | -0.004824 | -0.004027 | 0.004224  |
| O | 0.255692  | 9.867992  | 1.847787 | 0.004782  | 0.004001  | -0.004212 |
| O | -1.898737 | 10.834409 | 5.031182 | -0.004798 | 0.004012  | 0.004219  |
| O | 4.351879  | 2.967192  | 1.335608 | 0.004812  | -0.004017 | -0.004218 |
| O | -0.212316 | 4.798696  | 5.055280 | 0.001555  | -0.005409 | -0.001197 |
| O | 2.665458  | 9.002905  | 1.311510 | -0.001526 | 0.005398  | 0.001188  |
| O | 0.511030  | 11.699496 | 4.494905 | 0.001531  | 0.005399  | -0.001187 |
| O | 1.942113  | 2.102105  | 1.871885 | -0.001552 | -0.005412 | 0.001201  |
| O | 0.525580  | 2.169271  | 5.472081 | -0.003081 | -0.010503 | 0.005454  |
| O | 1.927562  | 11.632329 | 0.894709 | 0.003075  | 0.010503  | -0.005476 |
| O | -0.226867 | 9.070071  | 4.078104 | -0.003076 | 0.010504  | 0.005469  |
| O | 2.680009  | 4.731529  | 2.288686 | 0.003078  | -0.010499 | -0.005460 |
| O | 0.058846  | 0.698526  | 2.444964 | 0.039324  | 0.039927  | 0.012372  |
| O | 2.394296  | 13.103075 | 3.921826 | -0.039318 | -0.039915 | -0.012365 |
| O | 4.548725  | 7.599326  | 0.738431 | 0.039312  | -0.039917 | 0.012361  |
| O | -2.095583 | 6.202275  | 5.628359 | -0.039330 | 0.039931  | -0.012374 |
| O | -2.459230 | 13.184059 | 5.445139 | 0.028861  | -0.034914 | 0.037182  |
| O | 4.912372  | 0.617542  | 0.921651 | -0.028881 | 0.034935  | -0.037202 |
| O | 2.757943  | 6.283259  | 4.105046 | 0.028875  | 0.034918  | 0.037191  |
| O | -0.304801 | 7.518342  | 2.261744 | -0.028868 | -0.034931 | -0.037193 |
| O | -0.175430 | 2.374756  | 0.744070 | 0.007355  | 0.009371  | 0.001323  |
| O | 2.628573  | 11.426844 | 5.622720 | -0.007305 | -0.009372 | -0.001266 |
| O | 4.783002  | 9.275557  | 2.439325 | 0.007330  | -0.009376 | 0.001275  |
| O | -2.329859 | 4.526044  | 3.927465 | -0.007332 | 0.009370  | -0.001307 |
| O | -1.223866 | 12.517207 | 2.155216 | -0.004691 | -0.030511 | 0.007453  |
| O | 3.677009  | 1.284394  | 4.211574 | 0.004699  | 0.030505  | -0.007444 |
| O | 5.831438  | 5.616407  | 1.028179 | -0.004690 | 0.030490  | 0.007447  |
| O | -3.378295 | 8.185194  | 5.338611 | 0.004699  | -0.030526 | -0.007450 |
| H | -0.637445 | 12.195109 | 2.878812 | -0.004129 | -0.080642 | -0.006261 |
| H | 3.090587  | 1.606491  | 3.487978 | 0.004122  | 0.080530  | 0.006235  |
| H | 5.245016  | 5.294309  | 0.304583 | -0.004150 | 0.080626  | -0.006249 |
| H | -2.791874 | 8.507292  | 6.062207 | 0.004107  | -0.080556 | 0.006247  |

33 f = 29.449967 THz 185.039603 2PiTHz 982.345144 cm-1 121.795319  
meV

X Y Z dx dy dz

|    |           |           |          |           |           |           |
|----|-----------|-----------|----------|-----------|-----------|-----------|
| Li | 3.769818  | 9.645336  | 4.001386 | 0.000523  | -0.000049 | -0.002560 |
| Li | -1.316675 | 4.156264  | 2.365404 | -0.000530 | 0.000054  | 0.002563  |
| Li | -3.471104 | 2.744536  | 5.548798 | 0.000529  | 0.000052  | -0.002563 |
| Li | 5.924247  | 11.057064 | 0.817991 | -0.000528 | -0.000051 | 0.002557  |
| Na | 2.049025  | 6.784862  | 1.629696 | -0.000941 | -0.000513 | -0.000776 |
| Na | 0.404117  | 7.016739  | 4.737094 | 0.000941  | 0.000515  | 0.000780  |
| Na | 2.558546  | 13.685662 | 1.553699 | -0.000942 | 0.000513  | -0.000780 |
| Na | -0.105403 | 0.115939  | 4.813091 | 0.000939  | -0.000515 | 0.000776  |
| B  | 4.155007  | 8.978944  | 1.168663 | 0.044228  | 0.033405  | -0.044628 |
| B  | -1.701865 | 4.822656  | 5.198127 | -0.044179 | -0.033390 | 0.044701  |
| B  | 0.452564  | 2.078144  | 2.014732 | 0.044236  | -0.033412 | -0.044625 |
| B  | 2.000578  | 11.723457 | 4.352058 | -0.044182 | 0.033371  | 0.044691  |
| B  | -2.733891 | 11.746082 | 5.839177 | -0.019893 | 0.023086  | 0.052986  |
| B  | 5.187034  | 2.055518  | 0.527613 | 0.019856  | -0.023094 | -0.052974 |
| B  | 3.032605  | 4.845282  | 3.711007 | -0.019845 | -0.023091 | 0.053015  |
| B  | -0.579463 | 8.956318  | 2.655782 | 0.019876  | 0.023088  | -0.052932 |
| B  | -0.983708 | 0.054306  | 1.827988 | 0.004895  | 0.003653  | -0.003788 |
| B  | 3.436850  | 13.747295 | 4.538802 | -0.004901 | -0.003656 | 0.003797  |
| B  | 5.591279  | 6.955106  | 1.355407 | 0.004890  | -0.003641 | -0.003788 |
| B  | -3.138137 | 6.846495  | 5.011383 | -0.004909 | 0.003668  | 0.003794  |
| Si | 0.631772  | 3.486686  | 4.508512 | 0.038330  | -0.011460 | 0.024078  |
| Si | 1.821370  | 10.314915 | 1.858278 | -0.038317 | 0.011478  | -0.024064 |
| Si | -0.333059 | 10.387486 | 5.041673 | 0.038327  | 0.011470  | 0.024074  |
| Si | 2.786201  | 3.414115  | 1.325117 | -0.038311 | -0.011481 | -0.024066 |
| O  | 0.061445  | 3.072947  | 3.041906 | -0.022602 | 0.004768  | -0.021555 |
| O  | 2.391697  | 10.728653 | 3.324884 | 0.022593  | -0.004759 | 0.021554  |
| O  | 4.546126  | 9.973747  | 0.141489 | -0.022605 | -0.004773 | -0.021543 |
| O  | -2.092984 | 3.827853  | 6.225301 | 0.022587  | 0.004762  | 0.021546  |
| O  | 2.197450  | 3.933608  | 4.519003 | -0.044699 | -0.005359 | -0.008426 |
| O  | 0.255692  | 9.867992  | 1.847787 | 0.044641  | 0.005322  | 0.008440  |
| O  | -1.898737 | 10.834409 | 5.031182 | -0.044676 | 0.005346  | -0.008431 |
| O  | 4.351879  | 2.967192  | 1.335608 | 0.044634  | -0.005319 | 0.008440  |
| O  | -0.212316 | 4.798696  | 5.055280 | -0.001295 | 0.017231  | -0.002828 |
| O  | 2.665458  | 9.002905  | 1.311510 | 0.001339  | -0.017262 | 0.002812  |
| O  | 0.511030  | 11.699496 | 4.494905 | -0.001314 | -0.017226 | -0.002832 |
| O  | 1.942113  | 2.102105  | 1.871885 | 0.001327  | 0.017270  | 0.002809  |

|   |           |           |          |           |           |           |
|---|-----------|-----------|----------|-----------|-----------|-----------|
| O | 0.525580  | 2.169271  | 5.472081 | -0.001997 | 0.022706  | -0.002560 |
| O | 1.927562  | 11.632329 | 0.894709 | 0.001999  | -0.022688 | 0.002523  |
| O | -0.226867 | 9.070071  | 4.078104 | -0.002001 | -0.022716 | -0.002580 |
| O | 2.680009  | 4.731529  | 2.288686 | 0.002000  | 0.022690  | 0.002519  |
| O | 0.058846  | 0.698526  | 2.444964 | -0.007577 | 0.009404  | 0.002652  |
| O | 2.394296  | 13.103075 | 3.921826 | 0.007538  | -0.009417 | -0.002672 |
| O | 4.548725  | 7.599326  | 0.738431 | -0.007581 | -0.009395 | 0.002645  |
| O | -2.095583 | 6.202275  | 5.628359 | 0.007531  | 0.009430  | -0.002677 |
| O | -2.459230 | 13.184059 | 5.445139 | 0.001342  | -0.011475 | -0.006769 |
| O | 4.912372  | 0.617542  | 0.921651 | -0.001310 | 0.011439  | 0.006798  |
| O | 2.757943  | 6.283259  | 4.105046 | 0.001353  | 0.011476  | -0.006763 |
| O | -0.304801 | 7.518342  | 2.261744 | -0.001300 | -0.011439 | 0.006804  |
| O | -0.175430 | 2.374756  | 0.744070 | -0.021530 | 0.003178  | 0.028539  |
| O | 2.628573  | 11.426844 | 5.622720 | 0.021527  | -0.003172 | -0.028561 |
| O | 4.783002  | 9.275557  | 2.439325 | -0.021533 | -0.003181 | 0.028519  |
| O | -2.329859 | 4.526044  | 3.927465 | 0.021504  | 0.003171  | -0.028591 |
| O | -1.223866 | 12.517207 | 2.155216 | -0.001735 | -0.003794 | 0.005030  |
| O | 3.677009  | 1.284394  | 4.211574 | 0.001746  | 0.003829  | -0.005038 |
| O | 5.831438  | 5.616407  | 1.028179 | -0.001738 | 0.003790  | 0.005026  |
| O | -3.378295 | 8.185194  | 5.338611 | 0.001743  | -0.003834 | -0.005039 |
| H | -0.637445 | 12.195109 | 2.878812 | 0.031656  | -0.034164 | -0.037912 |
| H | 3.090587  | 1.606491  | 3.487978 | -0.031690 | 0.034195  | 0.037933  |
| H | 5.245016  | 5.294309  | 0.304583 | 0.031660  | 0.034113  | -0.037893 |
| H | -2.791874 | 8.507292  | 6.062207 | -0.031682 | -0.034255 | 0.037952  |

34 f = 29.090305 THz 182.779777 2PiTHz 970.348100 cm-1 120.307875  
meV

|    | X         | Y         | Z        | dx        | dy        | dz        |
|----|-----------|-----------|----------|-----------|-----------|-----------|
| Li | 3.769818  | 9.645336  | 4.001386 | -0.001019 | -0.000575 | -0.000657 |
| Li | -1.316675 | 4.156264  | 2.365404 | -0.001017 | -0.000581 | -0.000649 |
| Li | -3.471104 | 2.744536  | 5.548798 | -0.001015 | 0.000581  | -0.000655 |
| Li | 5.924247  | 11.057064 | 0.817991 | -0.001018 | 0.000577  | -0.000652 |
| Na | 2.049025  | 6.784862  | 1.629696 | 0.000341  | -0.000221 | 0.000113  |
| Na | 0.404117  | 7.016739  | 4.737094 | 0.000343  | -0.000222 | 0.000107  |
| Na | 2.558546  | 13.685662 | 1.553699 | 0.000342  | 0.000223  | 0.000106  |
| Na | -0.105403 | 0.115939  | 4.813091 | 0.000342  | 0.000220  | 0.000114  |

|    |           |           |          |           |           |           |
|----|-----------|-----------|----------|-----------|-----------|-----------|
| B  | 4.155007  | 8.978944  | 1.168663 | -0.048906 | 0.001057  | -0.046501 |
| B  | -1.701865 | 4.822656  | 5.198127 | -0.048917 | 0.000975  | -0.046444 |
| B  | 0.452564  | 2.078144  | 2.014732 | -0.048837 | -0.001025 | -0.046480 |
| B  | 2.000578  | 11.723457 | 4.352058 | -0.048963 | -0.001008 | -0.046489 |
| B  | -2.733891 | 11.746082 | 5.839177 | -0.030471 | -0.000908 | -0.021973 |
| B  | 5.187034  | 2.055518  | 0.527613 | -0.030384 | -0.000935 | -0.021992 |
| B  | 3.032605  | 4.845282  | 3.711007 | -0.030407 | 0.000891  | -0.021928 |
| B  | -0.579463 | 8.956318  | 2.655782 | -0.030444 | 0.000952  | -0.022019 |
| B  | -0.983708 | 0.054306  | 1.827988 | 0.000023  | 0.007091  | -0.004336 |
| B  | 3.436850  | 13.747295 | 4.538802 | 0.000012  | 0.007085  | -0.004337 |
| B  | 5.591279  | 6.955106  | 1.355407 | 0.000019  | -0.007086 | -0.004338 |
| B  | -3.138137 | 6.846495  | 5.011383 | 0.000017  | -0.007088 | -0.004333 |
| Si | 0.631772  | 3.486686  | 4.508512 | -0.021729 | -0.008096 | -0.021239 |
| Si | 1.821370  | 10.314915 | 1.858278 | -0.021798 | -0.008081 | -0.021301 |
| Si | -0.333059 | 10.387486 | 5.041673 | -0.021763 | 0.008114  | -0.021272 |
| Si | 2.786201  | 3.414115  | 1.325117 | -0.021767 | 0.008068  | -0.021266 |
| O  | 0.061445  | 3.072947  | 3.041906 | 0.010735  | 0.015638  | 0.036319  |
| O  | 2.391697  | 10.728653 | 3.324884 | 0.010781  | 0.015671  | 0.036421  |
| O  | 4.546126  | 9.973747  | 0.141489 | 0.010753  | -0.015680 | 0.036399  |
| O  | -2.092984 | 3.827853  | 6.225301 | 0.010764  | -0.015623 | 0.036332  |
| O  | 2.197450  | 3.933608  | 4.519003 | 0.046807  | 0.027002  | -0.012839 |
| O  | 0.255692  | 9.867992  | 1.847787 | 0.046884  | 0.027019  | -0.012832 |
| O  | -1.898737 | 10.834409 | 5.031182 | 0.046860  | -0.027026 | -0.012850 |
| O  | 4.351879  | 2.967192  | 1.335608 | 0.046840  | -0.026998 | -0.012825 |
| O  | -0.212316 | 4.798696  | 5.055280 | 0.002701  | 0.008097  | -0.000025 |
| O  | 2.665458  | 9.002905  | 1.311510 | 0.002731  | 0.008065  | -0.000038 |
| O  | 0.511030  | 11.699496 | 4.494905 | 0.002717  | -0.008095 | -0.000034 |
| O  | 1.942113  | 2.102105  | 1.871885 | 0.002703  | -0.008074 | -0.000022 |
| O  | 0.525580  | 2.169271  | 5.472081 | -0.002991 | -0.018516 | 0.033473  |
| O  | 1.927562  | 11.632329 | 0.894709 | -0.002991 | -0.018570 | 0.033524  |
| O  | -0.226867 | 9.070071  | 4.078104 | -0.002992 | 0.018520  | 0.033492  |
| O  | 2.680009  | 4.731529  | 2.288686 | -0.002990 | 0.018560  | 0.033492  |
| O  | 0.058846  | 0.698526  | 2.444964 | 0.022552  | 0.012212  | 0.009089  |
| O  | 2.394296  | 13.103075 | 3.921826 | 0.022571  | 0.012197  | 0.009089  |
| O  | 4.548725  | 7.599326  | 0.738431 | 0.022562  | -0.012213 | 0.009088  |
| O  | -2.095583 | 6.202275  | 5.628359 | 0.022562  | -0.012196 | 0.009088  |



|   |           |           |          |           |           |           |
|---|-----------|-----------|----------|-----------|-----------|-----------|
| O | -2.459230 | 13.184059 | 5.445139 | -0.012610 | 0.020063  | -0.014408 |
| O | 4.912372  | 0.617542  | 0.921651 | -0.012616 | 0.020072  | -0.014406 |
| O | 2.757943  | 6.283259  | 4.105046 | -0.012616 | -0.020049 | -0.014410 |
| O | -0.304801 | 7.518342  | 2.261744 | -0.012613 | -0.020080 | -0.014403 |
| O | -0.175430 | 2.374756  | 0.744070 | 0.026282  | -0.002885 | 0.028739  |
| O | 2.628573  | 11.426844 | 5.622720 | 0.026352  | -0.002887 | 0.028729  |
| O | 4.783002  | 9.275557  | 2.439325 | 0.026323  | 0.002880  | 0.028746  |
| O | -2.329859 | 4.526044  | 3.927465 | 0.026315  | 0.002892  | 0.028710  |
| O | -1.223866 | 12.517207 | 2.155216 | -0.001709 | -0.019998 | 0.005744  |
| O | 3.677009  | 1.284394  | 4.211574 | -0.001707 | -0.019987 | 0.005737  |
| O | 5.831438  | 5.616407  | 1.028179 | -0.001707 | 0.019994  | 0.005745  |
| O | -3.378295 | 8.185194  | 5.338611 | -0.001706 | 0.019987  | 0.005736  |
| H | -0.637445 | 12.195109 | 2.878812 | -0.002696 | -0.013867 | 0.007776  |
| H | 3.090587  | 1.606491  | 3.487978 | -0.002724 | -0.013853 | 0.007803  |
| H | 5.245016  | 5.294309  | 0.304583 | -0.002680 | 0.013904  | 0.007752  |
| H | -2.791874 | 8.507292  | 6.062207 | -0.002745 | 0.013829  | 0.007824  |

35 f = 29.039522 THz 182.460697 2PiTHz 968.654153 cm-1 120.097852 meV

|    | X         | Y         | Z        | dx        | dy        | dz        |
|----|-----------|-----------|----------|-----------|-----------|-----------|
| Li | 3.769818  | 9.645336  | 4.001386 | 0.001141  | -0.001999 | 0.001704  |
| Li | -1.316675 | 4.156264  | 2.365404 | -0.001141 | 0.001995  | -0.001701 |
| Li | -3.471104 | 2.744536  | 5.548798 | -0.001142 | -0.001993 | -0.001701 |
| Li | 5.924247  | 11.057064 | 0.817991 | 0.001137  | 0.001998  | 0.001703  |
| Na | 2.049025  | 6.784862  | 1.629696 | -0.000019 | -0.001056 | 0.000505  |
| Na | 0.404117  | 7.016739  | 4.737094 | 0.000022  | 0.001056  | -0.000495 |
| Na | 2.558546  | 13.685662 | 1.553699 | 0.000021  | -0.001056 | -0.000495 |
| Na | -0.105403 | 0.115939  | 4.813091 | -0.000019 | 0.001056  | 0.000505  |
| B  | 4.155007  | 8.978944  | 1.168663 | 0.045648  | -0.007275 | 0.048331  |
| B  | -1.701865 | 4.822656  | 5.198127 | -0.045741 | 0.007237  | -0.048398 |
| B  | 0.452564  | 2.078144  | 2.014732 | -0.045702 | -0.007246 | -0.048407 |
| B  | 2.000578  | 11.723457 | 4.352058 | 0.045657  | 0.007274  | 0.048355  |
| B  | -2.733891 | 11.746082 | 5.839177 | 0.032983  | 0.004582  | 0.021106  |
| B  | 5.187034  | 2.055518  | 0.527613 | -0.033007 | -0.004580 | -0.021116 |
| B  | 3.032605  | 4.845282  | 3.711007 | -0.033027 | 0.004572  | -0.021091 |
| B  | -0.579463 | 8.956318  | 2.655782 | 0.032954  | -0.004586 | 0.021101  |

|    |           |           |          |           |           |           |
|----|-----------|-----------|----------|-----------|-----------|-----------|
| B  | -0.983708 | 0.054306  | 1.827988 | 0.001063  | 0.006554  | -0.004637 |
| B  | 3.436850  | 13.747295 | 4.538802 | -0.001061 | -0.006559 | 0.004641  |
| B  | 5.591279  | 6.955106  | 1.355407 | -0.001060 | 0.006552  | 0.004638  |
| B  | -3.138137 | 6.846495  | 5.011383 | 0.001064  | -0.006556 | -0.004635 |
| Si | 0.631772  | 3.486686  | 4.508512 | -0.022462 | -0.007585 | -0.020218 |
| Si | 1.821370  | 10.314915 | 1.858278 | 0.022453  | 0.007555  | 0.020199  |
| Si | -0.333059 | 10.387486 | 5.041673 | 0.022447  | -0.007567 | 0.020186  |
| Si | 2.786201  | 3.414115  | 1.325117 | -0.022477 | 0.007576  | -0.020231 |
| O  | 0.061445  | 3.072947  | 3.041906 | 0.010064  | 0.017744  | 0.038866  |
| O  | 2.391697  | 10.728653 | 3.324884 | -0.010058 | -0.017727 | -0.038825 |
| O  | 4.546126  | 9.973747  | 0.141489 | -0.010050 | 0.017717  | -0.038802 |
| O  | -2.092984 | 3.827853  | 6.225301 | 0.010076  | -0.017743 | 0.038876  |
| O  | 2.197450  | 3.933608  | 4.519003 | 0.047142  | 0.026150  | -0.012535 |
| O  | 0.255692  | 9.867992  | 1.847787 | -0.047103 | -0.026119 | 0.012517  |
| O  | -1.898737 | 10.834409 | 5.031182 | -0.047107 | 0.026125  | 0.012526  |
| O  | 4.351879  | 2.967192  | 1.335608 | 0.047154  | -0.026147 | -0.012529 |
| O  | -0.212316 | 4.798696  | 5.055280 | 0.002999  | 0.005180  | -0.001271 |
| O  | 2.665458  | 9.002905  | 1.311510 | -0.003009 | -0.005144 | 0.001278  |
| O  | 0.511030  | 11.699496 | 4.494905 | -0.002998 | 0.005155  | 0.001273  |
| O  | 1.942113  | 2.102105  | 1.871885 | 0.003000  | -0.005172 | -0.001269 |
| O  | 0.525580  | 2.169271  | 5.472081 | -0.003109 | -0.016626 | 0.030745  |
| O  | 1.927562  | 11.632329 | 0.894709 | 0.003103  | 0.016629  | -0.030742 |
| O  | -0.226867 | 9.070071  | 4.078104 | 0.003105  | -0.016611 | -0.030719 |
| O  | 2.680009  | 4.731529  | 2.288686 | -0.003108 | 0.016641  | 0.030751  |
| O  | 0.058846  | 0.698526  | 2.444964 | 0.022082  | 0.012546  | 0.009667  |
| O  | 2.394296  | 13.103075 | 3.921826 | -0.022068 | -0.012553 | -0.009657 |
| O  | 4.548725  | 7.599326  | 0.738431 | -0.022061 | 0.012551  | -0.009654 |
| O  | -2.095583 | 6.202275  | 5.628359 | 0.022089  | -0.012546 | 0.009665  |
| O  | -2.459230 | 13.184059 | 5.445139 | 0.012762  | -0.020476 | 0.014521  |
| O  | 4.912372  | 0.617542  | 0.921651 | -0.012779 | 0.020485  | -0.014531 |
| O  | 2.757943  | 6.283259  | 4.105046 | -0.012780 | -0.020483 | -0.014537 |
| O  | -0.304801 | 7.518342  | 2.261744 | 0.012762  | 0.020466  | 0.014513  |
| O  | -0.175430 | 2.374756  | 0.744070 | 0.027856  | -0.001069 | 0.028726  |
| O  | 2.628573  | 11.426844 | 5.622720 | -0.027817 | 0.001074  | -0.028704 |
| O  | 4.783002  | 9.275557  | 2.439325 | -0.027800 | -0.001071 | -0.028692 |
| O  | -2.329859 | 4.526044  | 3.927465 | 0.027879  | 0.001073  | 0.028721  |

|   |           |           |          |           |           |           |
|---|-----------|-----------|----------|-----------|-----------|-----------|
| O | -1.223866 | 12.517207 | 2.155216 | -0.003296 | -0.018582 | 0.004923  |
| O | 3.677009  | 1.284394  | 4.211574 | 0.003299  | 0.018576  | -0.004922 |
| O | 5.831438  | 5.616407  | 1.028179 | 0.003298  | -0.018567 | -0.004916 |
| O | -3.378295 | 8.185194  | 5.338611 | -0.003296 | 0.018582  | 0.004925  |
| H | -0.637445 | 12.195109 | 2.878812 | 0.005429  | -0.020779 | 0.001448  |
| H | 3.090587  | 1.606491  | 3.487978 | -0.005472 | 0.020761  | -0.001420 |
| H | 5.245016  | 5.294309  | 0.304583 | -0.005450 | -0.020744 | -0.001439 |
| H | -2.791874 | 8.507292  | 6.062207 | 0.005436  | 0.020795  | 0.001437  |

36 f = 28.791484 THz 180.902228 2PiTHz 960.380495 cm-1 119.072049 meV

|    | X         | Y         | Z        | dx        | dy        | dz        |
|----|-----------|-----------|----------|-----------|-----------|-----------|
| Li | 3.769818  | 9.645336  | 4.001386 | -0.002032 | 0.004485  | -0.000686 |
| Li | -1.316675 | 4.156264  | 2.365404 | -0.002042 | 0.004540  | -0.000675 |
| Li | -3.471104 | 2.744536  | 5.548798 | -0.002043 | -0.004540 | -0.000671 |
| Li | 5.924247  | 11.057064 | 0.817991 | -0.002026 | -0.004483 | -0.000690 |
| Na | 2.049025  | 6.784862  | 1.629696 | -0.000088 | 0.000523  | -0.000159 |
| Na | 0.404117  | 7.016739  | 4.737094 | -0.000095 | 0.000530  | -0.000151 |
| Na | 2.558546  | 13.685662 | 1.553699 | -0.000094 | -0.000530 | -0.000150 |
| Na | -0.105403 | 0.115939  | 4.813091 | -0.000089 | -0.000522 | -0.000159 |
| B  | 4.155007  | 8.978944  | 1.168663 | 0.010685  | 0.010760  | 0.006961  |
| B  | -1.701865 | 4.822656  | 5.198127 | 0.010834  | 0.010990  | 0.007052  |
| B  | 0.452564  | 2.078144  | 2.014732 | 0.010768  | -0.010947 | 0.007053  |
| B  | 2.000578  | 11.723457 | 4.352058 | 0.010740  | -0.010805 | 0.006926  |
| B  | -2.733891 | 11.746082 | 5.839177 | -0.030326 | -0.021037 | -0.038508 |
| B  | 5.187034  | 2.055518  | 0.527613 | -0.030590 | -0.021304 | -0.039133 |
| B  | 3.032605  | 4.845282  | 3.711007 | -0.030565 | 0.021351  | -0.039161 |
| B  | -0.579463 | 8.956318  | 2.655782 | -0.030319 | 0.021001  | -0.038466 |
| B  | -0.983708 | 0.054306  | 1.827988 | -0.002904 | -0.010669 | 0.002616  |
| B  | 3.436850  | 13.747295 | 4.538802 | -0.002841 | -0.010514 | 0.002605  |
| B  | 5.591279  | 6.955106  | 1.355407 | -0.002848 | 0.010520  | 0.002606  |
| B  | -3.138137 | 6.846495  | 5.011383 | -0.002895 | 0.010669  | 0.002618  |
| Si | 0.631772  | 3.486686  | 4.508512 | -0.011158 | -0.016443 | -0.015451 |
| Si | 1.821370  | 10.314915 | 1.858278 | -0.011138 | -0.016454 | -0.015235 |
| Si | -0.333059 | 10.387486 | 5.041673 | -0.011150 | 0.016436  | -0.015235 |
| Si | 2.786201  | 3.414115  | 1.325117 | -0.011143 | 0.016476  | -0.015432 |

|   |           |           |          |           |           |           |
|---|-----------|-----------|----------|-----------|-----------|-----------|
| O | 0.061445  | 3.072947  | 3.041906 | 0.008642  | 0.035203  | 0.063483  |
| O | 2.391697  | 10.728653 | 3.324884 | 0.008551  | 0.034845  | 0.062876  |
| O | 4.546126  | 9.973747  | 0.141489 | 0.008560  | -0.034816 | 0.062837  |
| O | -2.092984 | 3.827853  | 6.225301 | 0.008625  | -0.035215 | 0.063486  |
| O | 2.197450  | 3.933608  | 4.519003 | -0.009264 | -0.012667 | 0.011974  |
| O | 0.255692  | 9.867992  | 1.847787 | -0.008814 | -0.012389 | 0.011769  |
| O | -1.898737 | 10.834409 | 5.031182 | -0.008807 | 0.012397  | 0.011782  |
| O | 4.351879  | 2.967192  | 1.335608 | -0.009259 | 0.012649  | 0.011955  |
| O | -0.212316 | 4.798696  | 5.055280 | 0.014977  | -0.007298 | -0.011094 |
| O | 2.665458  | 9.002905  | 1.311510 | 0.014734  | -0.007131 | -0.010946 |
| O | 0.511030  | 11.699496 | 4.494905 | 0.014730  | 0.007139  | -0.010944 |
| O | 1.942113  | 2.102105  | 1.871885 | 0.014975  | 0.007278  | -0.011092 |
| O | 0.525580  | 2.169271  | 5.472081 | 0.005908  | 0.027184  | -0.016146 |
| O | 1.927562  | 11.632329 | 0.894709 | 0.005809  | 0.027126  | -0.016285 |
| O | -0.226867 | 9.070071  | 4.078104 | 0.005810  | -0.027109 | -0.016277 |
| O | 2.680009  | 4.731529  | 2.288686 | 0.005903  | -0.027230 | -0.016189 |
| O | 0.058846  | 0.698526  | 2.444964 | -0.027567 | -0.026138 | -0.015492 |
| O | 2.394296  | 13.103075 | 3.921826 | -0.027316 | -0.025889 | -0.015362 |
| O | 4.548725  | 7.599326  | 0.738431 | -0.027316 | 0.025905  | -0.015365 |
| O | -2.095583 | 6.202275  | 5.628359 | -0.027574 | 0.026122  | -0.015492 |
| O | -2.459230 | 13.184059 | 5.445139 | 0.023925  | -0.020574 | 0.032034  |
| O | 4.912372  | 0.617542  | 0.921651 | 0.024137  | -0.020727 | 0.032279  |
| O | 2.757943  | 6.283259  | 4.105046 | 0.024129  | 0.020711  | 0.032276  |
| O | -0.304801 | 7.518342  | 2.261744 | 0.023933  | 0.020593  | 0.032040  |
| O | -0.175430 | 2.374756  | 0.744070 | 0.016315  | 0.005939  | -0.009617 |
| O | 2.628573  | 11.426844 | 5.622720 | 0.016135  | 0.005888  | -0.009470 |
| O | 4.783002  | 9.275557  | 2.439325 | 0.016138  | -0.005883 | -0.009486 |
| O | -2.329859 | 4.526044  | 3.927465 | 0.016296  | -0.005947 | -0.009616 |
| O | -1.223866 | 12.517207 | 2.155216 | 0.003380  | 0.027086  | -0.008754 |
| O | 3.677009  | 1.284394  | 4.211574 | 0.003323  | 0.026788  | -0.008698 |
| O | 5.831438  | 5.616407  | 1.028179 | 0.003325  | -0.026804 | -0.008705 |
| O | -3.378295 | 8.185194  | 5.338611 | 0.003378  | -0.027078 | -0.008748 |
| H | -0.637445 | 12.195109 | 2.878812 | -0.008833 | 0.063873  | 0.014986  |
| H | 3.090587  | 1.606491  | 3.487978 | -0.008907 | 0.063946  | 0.015224  |
| H | 5.245016  | 5.294309  | 0.304583 | -0.008945 | -0.063973 | 0.015259  |
| H | -2.791874 | 8.507292  | 6.062207 | -0.008797 | -0.063832 | 0.014943  |

37 f = 28.773679 THz 180.790358 2PiTHz 959.786596 cm-1 118.998414  
meV

|    | X         | Y         | Z        | dx        | dy        | dz        |
|----|-----------|-----------|----------|-----------|-----------|-----------|
| Li | 3.769818  | 9.645336  | 4.001386 | 0.001306  | -0.004463 | -0.001172 |
| Li | -1.316675 | 4.156264  | 2.365404 | -0.001285 | 0.004404  | 0.001175  |
| Li | -3.471104 | 2.744536  | 5.548798 | -0.001286 | -0.004406 | 0.001174  |
| Li | 5.924247  | 11.057064 | 0.817991 | 0.001302  | 0.004460  | -0.001173 |
| Na | 2.049025  | 6.784862  | 1.629696 | 0.000193  | -0.000708 | 0.000420  |
| Na | 0.404117  | 7.016739  | 4.737094 | -0.000196 | 0.000701  | -0.000423 |
| Na | 2.558546  | 13.685662 | 1.553699 | -0.000196 | -0.000703 | -0.000423 |
| Na | -0.105403 | 0.115939  | 4.813091 | 0.000193  | 0.000707  | 0.000420  |
| B  | 4.155007  | 8.978944  | 1.168663 | -0.005485 | -0.014215 | -0.012172 |
| B  | -1.701865 | 4.822656  | 5.198127 | 0.005407  | 0.014114  | 0.012022  |
| B  | 0.452564  | 2.078144  | 2.014732 | 0.005358  | -0.014092 | 0.012031  |
| B  | 2.000578  | 11.723457 | 4.352058 | -0.005519 | 0.014252  | -0.012134 |
| B  | -2.733891 | 11.746082 | 5.839177 | 0.028111  | 0.028761  | 0.054295  |
| B  | 5.187034  | 2.055518  | 0.527613 | -0.027829 | -0.028471 | -0.053696 |
| B  | 3.032605  | 4.845282  | 3.711007 | -0.027822 | 0.028488  | -0.053730 |
| B  | -0.579463 | 8.956318  | 2.655782 | 0.028091  | -0.028743 | 0.054238  |
| B  | -0.983708 | 0.054306  | 1.827988 | -0.004277 | -0.014680 | 0.002757  |
| B  | 3.436850  | 13.747295 | 4.538802 | 0.004315  | 0.014798  | -0.002778 |
| B  | 5.591279  | 6.955106  | 1.355407 | 0.004315  | -0.014799 | -0.002781 |
| B  | -3.138137 | 6.846495  | 5.011383 | -0.004276 | 0.014683  | 0.002757  |
| Si | 0.631772  | 3.486686  | 4.508512 | -0.001755 | -0.004661 | -0.019307 |
| Si | 1.821370  | 10.314915 | 1.858278 | 0.001844  | 0.004817  | 0.019472  |
| Si | -0.333059 | 10.387486 | 5.041673 | 0.001853  | -0.004809 | 0.019468  |
| Si | 2.786201  | 3.414115  | 1.325117 | -0.001748 | 0.004675  | -0.019296 |
| O  | 0.061445  | 3.072947  | 3.041906 | 0.008675  | 0.034095  | 0.058364  |
| O  | 2.391697  | 10.728653 | 3.324884 | -0.008768 | -0.034491 | -0.059039 |
| O  | 4.546126  | 9.973747  | 0.141489 | -0.008772 | 0.034465  | -0.059008 |
| O  | -2.092984 | 3.827853  | 6.225301 | 0.008666  | -0.034103 | 0.058363  |
| O  | 2.197450  | 3.933608  | 4.519003 | -0.035787 | -0.022555 | 0.016577  |
| O  | 0.255692  | 9.867992  | 1.847787 | 0.036007  | 0.022743  | -0.016732 |
| O  | -1.898737 | 10.834409 | 5.031182 | 0.035991  | -0.022746 | -0.016744 |
| O  | 4.351879  | 2.967192  | 1.335608 | -0.035789 | 0.022546  | 0.016568  |

|   |           |           |          |           |           |           |
|---|-----------|-----------|----------|-----------|-----------|-----------|
| O | -0.212316 | 4.798696  | 5.055280 | 0.020364  | -0.011649 | -0.013014 |
| O | 2.665458  | 9.002905  | 1.311510 | -0.020574 | 0.011745  | 0.013150  |
| O | 0.511030  | 11.699496 | 4.494905 | -0.020570 | -0.011752 | 0.013145  |
| O | 1.942113  | 2.102105  | 1.871885 | 0.020371  | 0.011643  | -0.013018 |
| O | 0.525580  | 2.169271  | 5.472081 | 0.008329  | 0.011844  | 0.004620  |
| O | 1.927562  | 11.632329 | 0.894709 | -0.008413 | -0.012121 | -0.004527 |
| O | -0.226867 | 9.070071  | 4.078104 | -0.008410 | 0.012124  | -0.004505 |
| O | 2.680009  | 4.731529  | 2.288686 | 0.008330  | -0.011859 | 0.004615  |
| O | 0.058846  | 0.698526  | 2.444964 | -0.023737 | -0.022360 | -0.013086 |
| O | 2.394296  | 13.103075 | 3.921826 | 0.024039  | 0.022627  | 0.013255  |
| O | 4.548725  | 7.599326  | 0.738431 | 0.024047  | -0.022642 | 0.013261  |
| O | -2.095583 | 6.202275  | 5.628359 | -0.023739 | 0.022351  | -0.013083 |
| O | -2.459230 | 13.184059 | 5.445139 | -0.019653 | 0.013113  | -0.022771 |
| O | 4.912372  | 0.617542  | 0.921651 | 0.019386  | -0.012899 | 0.022413  |
| O | 2.757943  | 6.283259  | 4.105046 | 0.019382  | 0.012889  | 0.022411  |
| O | -0.304801 | 7.518342  | 2.261744 | -0.019659 | -0.013130 | -0.022778 |
| O | -0.175430 | 2.374756  | 0.744070 | 0.018628  | 0.005444  | -0.011900 |
| O | 2.628573  | 11.426844 | 5.622720 | -0.018765 | -0.005507 | 0.012014  |
| O | 4.783002  | 9.275557  | 2.439325 | -0.018766 | 0.005508  | 0.012032  |
| O | -2.329859 | 4.526044  | 3.927465 | 0.018612  | -0.005445 | -0.011898 |
| O | -1.223866 | 12.517207 | 2.155216 | 0.005283  | 0.027560  | -0.004815 |
| O | 3.677009  | 1.284394  | 4.211574 | -0.005315 | -0.027841 | 0.004912  |
| O | 5.831438  | 5.616407  | 1.028179 | -0.005317 | 0.027856  | 0.004913  |
| O | -3.378295 | 8.185194  | 5.338611 | 0.005282  | -0.027555 | -0.004815 |
| H | -0.637445 | 12.195109 | 2.878812 | 0.009917  | -0.008555 | -0.025063 |
| H | 3.090587  | 1.606491  | 3.487978 | -0.009804 | 0.007805  | 0.024856  |
| H | 5.245016  | 5.294309  | 0.304583 | -0.009817 | -0.007806 | 0.024879  |
| H | -2.791874 | 8.507292  | 6.062207 | 0.009908  | 0.008557  | -0.025051 |

38 f = 28.699607 THz 180.324950 2PiTHz 957.315821 cm-1 118.692077 meV

|    | X         | Y         | Z        | dx        | dy        | dz        |
|----|-----------|-----------|----------|-----------|-----------|-----------|
| Li | 3.769818  | 9.645336  | 4.001386 | -0.002932 | -0.002400 | -0.002912 |
| Li | -1.316675 | 4.156264  | 2.365404 | 0.002914  | 0.002384  | 0.002887  |
| Li | -3.471104 | 2.744536  | 5.548798 | 0.002917  | -0.002383 | 0.002891  |
| Li | 5.924247  | 11.057064 | 0.817991 | -0.002926 | 0.002405  | -0.002909 |

|    |           |           |          |           |           |           |
|----|-----------|-----------|----------|-----------|-----------|-----------|
| Na | 2.049025  | 6.784862  | 1.629696 | 0.000506  | -0.000769 | 0.000262  |
| Na | 0.404117  | 7.016739  | 4.737094 | -0.000506 | 0.000775  | -0.000252 |
| Na | 2.558546  | 13.685662 | 1.553699 | -0.000506 | -0.000774 | -0.000251 |
| Na | -0.105403 | 0.115939  | 4.813091 | 0.000506  | 0.000771  | 0.000262  |
| B  | 4.155007  | 8.978944  | 1.168663 | 0.012610  | -0.000047 | 0.004565  |
| B  | -1.701865 | 4.822656  | 5.198127 | -0.012564 | -0.000032 | -0.004547 |
| B  | 0.452564  | 2.078144  | 2.014732 | -0.012545 | 0.000002  | -0.004599 |
| B  | 2.000578  | 11.723457 | 4.352058 | 0.012667  | 0.000004  | 0.004501  |
| B  | -2.733891 | 11.746082 | 5.839177 | -0.030108 | 0.006712  | 0.056300  |
| B  | 5.187034  | 2.055518  | 0.527613 | 0.030029  | -0.006600 | -0.055815 |
| B  | 3.032605  | 4.845282  | 3.711007 | 0.030062  | 0.006595  | -0.055763 |
| B  | -0.579463 | 8.956318  | 2.655782 | -0.030094 | -0.006721 | 0.056366  |
| B  | -0.983708 | 0.054306  | 1.827988 | -0.002222 | 0.006698  | -0.008168 |
| B  | 3.436850  | 13.747295 | 4.538802 | 0.002256  | -0.006700 | 0.008203  |
| B  | 5.591279  | 6.955106  | 1.355407 | 0.002257  | 0.006705  | 0.008210  |
| B  | -3.138137 | 6.846495  | 5.011383 | -0.002219 | -0.006699 | -0.008163 |
| Si | 0.631772  | 3.486686  | 4.508512 | 0.015385  | 0.028847  | -0.004563 |
| Si | 1.821370  | 10.314915 | 1.858278 | -0.015490 | -0.029015 | 0.004673  |
| Si | -0.333059 | 10.387486 | 5.041673 | -0.015497 | 0.029019  | 0.004683  |
| Si | 2.786201  | 3.414115  | 1.325117 | 0.015390  | -0.028846 | -0.004539 |
| O  | 0.061445  | 3.072947  | 3.041906 | -0.002438 | -0.007810 | -0.023112 |
| O  | 2.391697  | 10.728653 | 3.324884 | 0.002412  | 0.007767  | 0.023082  |
| O  | 4.546126  | 9.973747  | 0.141489 | 0.002419  | -0.007732 | 0.023036  |
| O  | -2.092984 | 3.827853  | 6.225301 | -0.002442 | 0.007846  | -0.023173 |
| O  | 2.197450  | 3.933608  | 4.519003 | -0.047730 | -0.017708 | 0.010064  |
| O  | 0.255692  | 9.867992  | 1.847787 | 0.048170  | 0.017906  | -0.010193 |
| O  | -1.898737 | 10.834409 | 5.031182 | 0.048185  | -0.017904 | -0.010188 |
| O  | 4.351879  | 2.967192  | 1.335608 | -0.047725 | 0.017710  | 0.010071  |
| O  | -0.212316 | 4.798696  | 5.055280 | 0.013812  | -0.005791 | -0.001067 |
| O  | 2.665458  | 9.002905  | 1.311510 | -0.013949 | 0.005846  | 0.001108  |
| O  | 0.511030  | 11.699496 | 4.494905 | -0.013969 | -0.005853 | 0.001123  |
| O  | 1.942113  | 2.102105  | 1.871885 | 0.013805  | 0.005788  | -0.001060 |
| O  | 0.525580  | 2.169271  | 5.472081 | 0.005424  | -0.042411 | 0.063077  |
| O  | 1.927562  | 11.632329 | 0.894709 | -0.005489 | 0.042645  | -0.063479 |
| O  | -0.226867 | 9.070071  | 4.078104 | -0.005493 | -0.042664 | -0.063522 |
| O  | 2.680009  | 4.731529  | 2.288686 | 0.005421  | 0.042387  | 0.063036  |

|   |           |           |          |           |           |           |
|---|-----------|-----------|----------|-----------|-----------|-----------|
| O | 0.058846  | 0.698526  | 2.444964 | 0.015038  | 0.013010  | 0.009452  |
| O | 2.394296  | 13.103075 | 3.921826 | -0.015055 | -0.013009 | -0.009451 |
| O | 4.548725  | 7.599326  | 0.738431 | -0.015063 | 0.013024  | -0.009460 |
| O | -2.095583 | 6.202275  | 5.628359 | 0.015028  | -0.013003 | 0.009444  |
| O | -2.459230 | 13.184059 | 5.445139 | 0.011177  | -0.010857 | 0.013347  |
| O | 4.912372  | 0.617542  | 0.921651 | -0.011193 | 0.010872  | -0.013360 |
| O | 2.757943  | 6.283259  | 4.105046 | -0.011188 | -0.010861 | -0.013352 |
| O | -0.304801 | 7.518342  | 2.261744 | 0.011184  | 0.010873  | 0.013352  |
| O | -0.175430 | 2.374756  | 0.744070 | -0.008874 | -0.004141 | 0.003060  |
| O | 2.628573  | 11.426844 | 5.622720 | 0.008852  | 0.004153  | -0.003014 |
| O | 4.783002  | 9.275557  | 2.439325 | 0.008856  | -0.004153 | -0.003031 |
| O | -2.329859 | 4.526044  | 3.927465 | -0.008891 | 0.004140  | 0.003049  |
| O | -1.223866 | 12.517207 | 2.155216 | -0.002803 | -0.016804 | 0.004642  |
| O | 3.677009  | 1.284394  | 4.211574 | 0.002809  | 0.016818  | -0.004635 |
| O | 5.831438  | 5.616407  | 1.028179 | 0.002813  | -0.016836 | -0.004637 |
| O | -3.378295 | 8.185194  | 5.338611 | -0.002801 | 0.016794  | 0.004641  |
| H | -0.637445 | 12.195109 | 2.878812 | 0.004491  | -0.011976 | 0.001903  |
| H | 3.090587  | 1.606491  | 3.487978 | -0.004457 | 0.011814  | -0.001992 |
| H | 5.245016  | 5.294309  | 0.304583 | -0.004466 | -0.011813 | -0.001997 |
| H | -2.791874 | 8.507292  | 6.062207 | 0.004492  | 0.011967  | 0.001897  |

39 f = 28.694290 THz 180.291542 2PiTHz 957.138461 cm-1 118.670087 meV

|    | X         | Y         | Z        | dx        | dy        | dz        |
|----|-----------|-----------|----------|-----------|-----------|-----------|
| Li | 3.769818  | 9.645336  | 4.001386 | -0.002109 | -0.002411 | -0.003015 |
| Li | -1.316675 | 4.156264  | 2.365404 | -0.002124 | -0.002436 | -0.003037 |
| Li | -3.471104 | 2.744536  | 5.548798 | -0.002131 | 0.002436  | -0.003041 |
| Li | 5.924247  | 11.057064 | 0.817991 | -0.002101 | 0.002413  | -0.003012 |
| Na | 2.049025  | 6.784862  | 1.629696 | -0.000229 | 0.000582  | -0.000172 |
| Na | 0.404117  | 7.016739  | 4.737094 | -0.000226 | 0.000575  | -0.000164 |
| Na | 2.558546  | 13.685662 | 1.553699 | -0.000226 | -0.000575 | -0.000163 |
| Na | -0.105403 | 0.115939  | 4.813091 | -0.000229 | -0.000582 | -0.000173 |
| B  | 4.155007  | 8.978944  | 1.168663 | 0.010316  | -0.003978 | -0.003837 |
| B  | -1.701865 | 4.822656  | 5.198127 | 0.010449  | -0.003945 | -0.003877 |
| B  | 0.452564  | 2.078144  | 2.014732 | 0.010430  | 0.003979  | -0.003812 |
| B  | 2.000578  | 11.723457 | 4.352058 | 0.010365  | 0.003948  | -0.003905 |



|    |           |           |          |           |           |           |
|----|-----------|-----------|----------|-----------|-----------|-----------|
| B  | -2.733891 | 11.746082 | 5.839177 | -0.016865 | 0.012813  | 0.067622  |
| B  | 5.187034  | 2.055518  | 0.527613 | -0.016995 | 0.012925  | 0.068202  |
| B  | 3.032605  | 4.845282  | 3.711007 | -0.017055 | -0.012922 | 0.068128  |
| B  | -0.579463 | 8.956318  | 2.655782 | -0.016825 | -0.012815 | 0.067692  |
| B  | -0.983708 | 0.054306  | 1.827988 | 0.004933  | -0.001880 | 0.006079  |
| B  | 3.436850  | 13.747295 | 4.538802 | 0.004912  | -0.001841 | 0.006014  |
| B  | 5.591279  | 6.955106  | 1.355407 | 0.004912  | 0.001855  | 0.006024  |
| B  | -3.138137 | 6.846495  | 5.011383 | 0.004932  | 0.001870  | 0.006070  |
| Si | 0.631772  | 3.486686  | 4.508512 | -0.015409 | -0.025373 | 0.013446  |
| Si | 1.821370  | 10.314915 | 1.858278 | -0.015310 | -0.025160 | 0.013341  |
| Si | -0.333059 | 10.387486 | 5.041673 | -0.015302 | 0.025174  | 0.013368  |
| Si | 2.786201  | 3.414115  | 1.325117 | -0.015422 | 0.025366  | 0.013407  |
| O  | 0.061445  | 3.072947  | 3.041906 | -0.001744 | -0.005431 | -0.001538 |
| O  | 2.391697  | 10.728653 | 3.324884 | -0.001738 | -0.005391 | -0.001536 |
| O  | 4.546126  | 9.973747  | 0.141489 | -0.001741 | 0.005429  | -0.001599 |
| O  | -2.092984 | 3.827853  | 6.225301 | -0.001733 | 0.005384  | -0.001455 |
| O  | 2.197450  | 3.933608  | 4.519003 | 0.059772  | 0.025189  | -0.015062 |
| O  | 0.255692  | 9.867992  | 1.847787 | 0.059353  | 0.025020  | -0.014962 |
| O  | -1.898737 | 10.834409 | 5.031182 | 0.059357  | -0.025019 | -0.014962 |
| O  | 4.351879  | 2.967192  | 1.335608 | 0.059769  | -0.025189 | -0.015068 |
| O  | -0.212316 | 4.798696  | 5.055280 | -0.019331 | 0.007775  | 0.005281  |
| O  | 2.665458  | 9.002905  | 1.311510 | -0.019173 | 0.007710  | 0.005242  |
| O  | 0.511030  | 11.699496 | 4.494905 | -0.019206 | -0.007728 | 0.005259  |
| O  | 1.942113  | 2.102105  | 1.871885 | -0.019316 | -0.007767 | 0.005271  |
| O  | 0.525580  | 2.169271  | 5.472081 | -0.008229 | 0.036974  | -0.060943 |
| O  | 1.927562  | 11.632329 | 0.894709 | -0.008168 | 0.036641  | -0.060393 |
| O  | -0.226867 | 9.070071  | 4.078104 | -0.008174 | -0.036681 | -0.060461 |
| O  | 2.680009  | 4.731529  | 2.288686 | -0.008224 | -0.036931 | -0.060872 |
| O  | 0.058846  | 0.698526  | 2.444964 | -0.006698 | -0.004526 | -0.003639 |
| O  | 2.394296  | 13.103075 | 3.921826 | -0.006602 | -0.004455 | -0.003576 |
| O  | 4.548725  | 7.599326  | 0.738431 | -0.006615 | 0.004469  | -0.003586 |
| O  | -2.095583 | 6.202275  | 5.628359 | -0.006681 | 0.004513  | -0.003630 |
| O  | -2.459230 | 13.184059 | 5.445139 | 0.001928  | -0.002572 | 0.003199  |
| O  | 4.912372  | 0.617542  | 0.921651 | 0.001996  | -0.002665 | 0.003285  |
| O  | 2.757943  | 6.283259  | 4.105046 | 0.001989  | 0.002643  | 0.003272  |
| O  | -0.304801 | 7.518342  | 2.261744 | 0.001935  | 0.002594  | 0.003212  |

|   |           |           |          |          |           |           |
|---|-----------|-----------|----------|----------|-----------|-----------|
| O | -0.175430 | 2.374756  | 0.744070 | 0.001757 | 0.002544  | 0.004175  |
| O | 2.628573  | 11.426844 | 5.622720 | 0.001751 | 0.002514  | 0.004213  |
| O | 4.783002  | 9.275557  | 2.439325 | 0.001741 | -0.002519 | 0.004190  |
| O | -2.329859 | 4.526044  | 3.927465 | 0.001784 | -0.002540 | 0.004197  |
| O | -1.223866 | 12.517207 | 2.155216 | 0.001694 | 0.007537  | -0.000464 |
| O | 3.677009  | 1.284394  | 4.211574 | 0.001680 | 0.007423  | -0.000428 |
| O | 5.831438  | 5.616407  | 1.028179 | 0.001681 | -0.007450 | -0.000434 |
| O | -3.378295 | 8.185194  | 5.338611 | 0.001692 | -0.007512 | -0.000457 |
| H | -0.637445 | 12.195109 | 2.878812 | 0.002913 | -0.015023 | -0.011804 |
| H | 3.090587  | 1.606491  | 3.487978 | 0.002947 | -0.015124 | -0.011795 |
| H | 5.245016  | 5.294309  | 0.304583 | 0.002964 | 0.015135  | -0.011831 |
| H | -2.791874 | 8.507292  | 6.062207 | 0.002901 | 0.015021  | -0.011778 |

40 f = 28.593174 THz 179.656213 2PiTHz 953.765607 cm-1 118.251907 meV

|    | X         | Y         | Z        | dx        | dy        | dz        |
|----|-----------|-----------|----------|-----------|-----------|-----------|
| Li | 3.769818  | 9.645336  | 4.001386 | -0.004325 | 0.000615  | -0.002534 |
| Li | -1.316675 | 4.156264  | 2.365404 | -0.004651 | 0.000681  | -0.002733 |
| Li | -3.471104 | 2.744536  | 5.548798 | 0.004649  | 0.000687  | 0.002730  |
| Li | 5.924247  | 11.057064 | 0.817991 | 0.004328  | 0.000614  | 0.002537  |
| Na | 2.049025  | 6.784862  | 1.629696 | -0.000106 | 0.000717  | -0.000486 |
| Na | 0.404117  | 7.016739  | 4.737094 | -0.000090 | 0.000721  | -0.000444 |
| Na | 2.558546  | 13.685662 | 1.553699 | 0.000090  | 0.000721  | 0.000444  |
| Na | -0.105403 | 0.115939  | 4.813091 | 0.000106  | 0.000717  | 0.000486  |
| B  | 4.155007  | 8.978944  | 1.168663 | 0.003977  | -0.002266 | 0.045945  |
| B  | -1.701865 | 4.822656  | 5.198127 | 0.003362  | -0.003502 | 0.049495  |
| B  | 0.452564  | 2.078144  | 2.014732 | -0.003372 | -0.003495 | -0.049492 |
| B  | 2.000578  | 11.723457 | 4.352058 | -0.003957 | -0.002260 | -0.045940 |
| B  | -2.733891 | 11.746082 | 5.839177 | -0.039189 | 0.009715  | -0.026229 |
| B  | 5.187034  | 2.055518  | 0.527613 | -0.041684 | 0.009625  | -0.028952 |
| B  | 3.032605  | 4.845282  | 3.711007 | 0.041641  | 0.009614  | 0.029022  |
| B  | -0.579463 | 8.956318  | 2.655782 | 0.039249  | 0.009705  | 0.026214  |
| B  | -0.983708 | 0.054306  | 1.827988 | -0.001742 | 0.006443  | -0.005407 |
| B  | 3.436850  | 13.747295 | 4.538802 | -0.001724 | 0.006074  | -0.005066 |
| B  | 5.591279  | 6.955106  | 1.355407 | 0.001724  | 0.006068  | 0.005059  |
| B  | -3.138137 | 6.846495  | 5.011383 | 0.001745  | 0.006446  | 0.005415  |

|    |           |           |          |           |           |           |
|----|-----------|-----------|----------|-----------|-----------|-----------|
| Si | 0.631772  | 3.486686  | 4.508512 | -0.012879 | 0.017904  | -0.031754 |
| Si | 1.821370  | 10.314915 | 1.858278 | -0.012450 | 0.017188  | -0.030025 |
| Si | -0.333059 | 10.387486 | 5.041673 | 0.012471  | 0.017157  | 0.030043  |
| Si | 2.786201  | 3.414115  | 1.325117 | 0.012870  | 0.017928  | 0.031749  |
| O  | 0.061445  | 3.072947  | 3.041906 | 0.013121  | 0.027151  | 0.057467  |
| O  | 2.391697  | 10.728653 | 3.324884 | 0.012605  | 0.025167  | 0.053794  |
| O  | 4.546126  | 9.973747  | 0.141489 | -0.012616 | 0.025197  | -0.053859 |
| O  | -2.092984 | 3.827853  | 6.225301 | -0.013117 | 0.027147  | -0.057446 |
| O  | 2.197450  | 3.933608  | 4.519003 | -0.004479 | -0.003819 | 0.003644  |
| O  | 0.255692  | 9.867992  | 1.847787 | -0.003994 | -0.003706 | 0.003699  |
| O  | -1.898737 | 10.834409 | 5.031182 | 0.003954  | -0.003692 | -0.003694 |
| O  | 4.351879  | 2.967192  | 1.335608 | 0.004526  | -0.003840 | -0.003659 |
| O  | -0.212316 | 4.798696  | 5.055280 | 0.017748  | -0.017595 | -0.010423 |
| O  | 2.665458  | 9.002905  | 1.311510 | 0.016742  | -0.016854 | -0.009754 |
| O  | 0.511030  | 11.699496 | 4.494905 | -0.016745 | -0.016851 | 0.009761  |
| O  | 1.942113  | 2.102105  | 1.871885 | -0.017769 | -0.017611 | 0.010428  |
| O  | 0.525580  | 2.169271  | 5.472081 | 0.002738  | -0.040214 | 0.050835  |
| O  | 1.927562  | 11.632329 | 0.894709 | 0.002568  | -0.038123 | 0.047760  |
| O  | -0.226867 | 9.070071  | 4.078104 | -0.002568 | -0.038091 | -0.047726 |
| O  | 2.680009  | 4.731529  | 2.288686 | -0.002745 | -0.040238 | -0.050880 |
| O  | 0.058846  | 0.698526  | 2.444964 | 0.008626  | 0.000697  | 0.004530  |
| O  | 2.394296  | 13.103075 | 3.921826 | 0.007832  | 0.000191  | 0.004099  |
| O  | 4.548725  | 7.599326  | 0.738431 | -0.007821 | 0.000176  | -0.004089 |
| O  | -2.095583 | 6.202275  | 5.628359 | -0.008622 | 0.000699  | -0.004533 |
| O  | -2.459230 | 13.184059 | 5.445139 | -0.000137 | 0.005943  | -0.006496 |
| O  | 4.912372  | 0.617542  | 0.921651 | -0.000459 | 0.006866  | -0.007160 |
| O  | 2.757943  | 6.283259  | 4.105046 | 0.000458  | 0.006864  | 0.007153  |
| O  | -0.304801 | 7.518342  | 2.261744 | 0.000124  | 0.005935  | 0.006481  |
| O  | -0.175430 | 2.374756  | 0.744070 | 0.024882  | -0.005182 | 0.015813  |
| O  | 2.628573  | 11.426844 | 5.622720 | 0.023572  | -0.004970 | 0.014593  |
| O  | 4.783002  | 9.275557  | 2.439325 | -0.023606 | -0.004965 | -0.014596 |
| O  | -2.329859 | 4.526044  | 3.927465 | -0.024863 | -0.005187 | -0.015810 |
| O  | -1.223866 | 12.517207 | 2.155216 | -0.002479 | -0.009128 | 0.003165  |
| O  | 3.677009  | 1.284394  | 4.211574 | -0.002401 | -0.008084 | 0.002896  |
| O  | 5.831438  | 5.616407  | 1.028179 | 0.002399  | -0.008068 | -0.002890 |
| O  | -3.378295 | 8.185194  | 5.338611 | 0.002478  | -0.009131 | -0.003165 |

|   |           |           |          |           |           |           |
|---|-----------|-----------|----------|-----------|-----------|-----------|
| H | -0.637445 | 12.195109 | 2.878812 | 0.023273  | -0.001964 | -0.013742 |
| H | 3.090587  | 1.606491  | 3.487978 | 0.023964  | -0.001990 | -0.014977 |
| H | 5.245016  | 5.294309  | 0.304583 | -0.023954 | -0.001954 | 0.014964  |
| H | -2.791874 | 8.507292  | 6.062207 | -0.023264 | -0.001939 | 0.013725  |

41 f = 28.589604 THz 179.633780 2PiTHz 953.646509 cm-1 118.237140 meV

|    | X         | Y         | Z        | dx        | dy        | dz        |
|----|-----------|-----------|----------|-----------|-----------|-----------|
| Li | 3.769818  | 9.645336  | 4.001386 | 0.005043  | -0.001076 | 0.003120  |
| Li | -1.316675 | 4.156264  | 2.365404 | -0.004751 | 0.001018  | -0.002945 |
| Li | -3.471104 | 2.744536  | 5.548798 | 0.004749  | 0.001030  | 0.002946  |
| Li | 5.924247  | 11.057064 | 0.817991 | -0.005047 | -0.001068 | -0.003118 |
| Na | 2.049025  | 6.784862  | 1.629696 | -0.000267 | -0.000095 | -0.000485 |
| Na | 0.404117  | 7.016739  | 4.737094 | 0.000273  | 0.000045  | 0.000508  |
| Na | 2.558546  | 13.685662 | 1.553699 | -0.000272 | 0.000047  | -0.000508 |
| Na | -0.105403 | 0.115939  | 4.813091 | 0.000268  | -0.000094 | 0.000485  |
| B  | 4.155007  | 8.978944  | 1.168663 | 0.008947  | 0.018925  | -0.056249 |
| B  | -1.701865 | 4.822656  | 5.198127 | -0.009164 | -0.018699 | 0.053131  |
| B  | 0.452564  | 2.078144  | 2.014732 | 0.009165  | -0.018675 | -0.053119 |
| B  | 2.000578  | 11.723457 | 4.352058 | -0.008966 | 0.018931  | 0.056247  |
| B  | -2.733891 | 11.746082 | 5.839177 | 0.038605  | 0.001125  | 0.043378  |
| B  | 5.187034  | 2.055518  | 0.527613 | -0.036015 | -0.001729 | -0.041455 |
| B  | 3.032605  | 4.845282  | 3.711007 | 0.035985  | -0.001742 | 0.041573  |
| B  | -0.579463 | 8.956318  | 2.655782 | -0.038662 | 0.001130  | -0.043299 |
| B  | -0.983708 | 0.054306  | 1.827988 | -0.000299 | 0.005475  | -0.005228 |
| B  | 3.436850  | 13.747295 | 4.538802 | 0.000422  | -0.005887 | 0.005586  |
| B  | 5.591279  | 6.955106  | 1.355407 | -0.000416 | -0.005874 | -0.005574 |
| B  | -3.138137 | 6.846495  | 5.011383 | 0.000307  | 0.005481  | 0.005240  |
| Si | 0.631772  | 3.486686  | 4.508512 | -0.005658 | 0.010750  | -0.025305 |
| Si | 1.821370  | 10.314915 | 1.858278 | 0.006453  | -0.011922 | 0.027327  |
| Si | -0.333059 | 10.387486 | 5.041673 | -0.006483 | -0.011880 | -0.027328 |
| Si | 2.786201  | 3.414115  | 1.325117 | 0.005641  | 0.010787  | 0.025320  |
| O  | 0.061445  | 3.072947  | 3.041906 | 0.007332  | 0.029301  | 0.053726  |
| O  | 2.391697  | 10.728653 | 3.324884 | -0.008156 | -0.031032 | -0.057359 |
| O  | 4.546126  | 9.973747  | 0.141489 | 0.008163  | -0.031041 | 0.057392  |
| O  | -2.092984 | 3.827853  | 6.225301 | -0.007332 | 0.029315  | -0.053737 |

|   |           |           |          |           |           |           |
|---|-----------|-----------|----------|-----------|-----------|-----------|
| O | 2.197450  | 3.933608  | 4.519003 | -0.008312 | -0.002043 | -0.000747 |
| O | 0.255692  | 9.867992  | 1.847787 | 0.008673  | 0.002320  | 0.000492  |
| O | -1.898737 | 10.834409 | 5.031182 | -0.008593 | 0.002286  | -0.000509 |
| O | 4.351879  | 2.967192  | 1.335608 | 0.008393  | -0.002078 | 0.000723  |
| O | -0.212316 | 4.798696  | 5.055280 | 0.014770  | -0.010744 | -0.009813 |
| O | 2.665458  | 9.002905  | 1.311510 | -0.015907 | 0.011876  | 0.010479  |
| O | 0.511030  | 11.699496 | 4.494905 | 0.015897  | 0.011866  | -0.010478 |
| O | 1.942113  | 2.102105  | 1.871885 | -0.014800 | -0.010766 | 0.009825  |
| O | 0.525580  | 2.169271  | 5.472081 | 0.002538  | -0.031039 | 0.046099  |
| O | 1.927562  | 11.632329 | 0.894709 | -0.002723 | 0.033634  | -0.049404 |
| O | -0.226867 | 9.070071  | 4.078104 | 0.002715  | 0.033585  | 0.049329  |
| O | 2.680009  | 4.731529  | 2.288686 | -0.002550 | -0.031088 | -0.046187 |
| O | 0.058846  | 0.698526  | 2.444964 | 0.011910  | 0.007683  | 0.006657  |
| O | 2.394296  | 13.103075 | 3.921826 | -0.012464 | -0.007744 | -0.006952 |
| O | 4.548725  | 7.599326  | 0.738431 | 0.012459  | -0.007733 | 0.006946  |
| O | -2.095583 | 6.202275  | 5.628359 | -0.011909 | 0.007689  | -0.006660 |
| O | -2.459230 | 13.184059 | 5.445139 | 0.005007  | -0.014369 | 0.010361  |
| O | 4.912372  | 0.617542  | 0.921651 | -0.004981 | 0.013936  | -0.009908 |
| O | 2.757943  | 6.283259  | 4.105046 | 0.004975  | 0.013928  | 0.009898  |
| O | -0.304801 | 7.518342  | 2.261744 | -0.005008 | -0.014374 | -0.010361 |
| O | -0.175430 | 2.374756  | 0.744070 | 0.018886  | -0.003142 | 0.018285  |
| O | 2.628573  | 11.426844 | 5.622720 | -0.020427 | 0.003477  | -0.019274 |
| O | 4.783002  | 9.275557  | 2.439325 | 0.020459  | 0.003469  | 0.019279  |
| O | -2.329859 | 4.526044  | 3.927465 | -0.018879 | -0.003148 | -0.018283 |
| O | -1.223866 | 12.517207 | 2.155216 | -0.001076 | -0.015749 | 0.004069  |
| O | 3.677009  | 1.284394  | 4.211574 | 0.001243  | 0.016336  | -0.004269 |
| O | 5.831438  | 5.616407  | 1.028179 | -0.001237 | 0.016321  | 0.004269  |
| O | -3.378295 | 8.185194  | 5.338611 | 0.001079  | -0.015753 | -0.004067 |
| H | -0.637445 | 12.195109 | 2.878812 | -0.011242 | 0.001050  | 0.019617  |
| H | 3.090587  | 1.606491  | 3.487978 | 0.009702  | -0.000959 | -0.018709 |
| H | 5.245016  | 5.294309  | 0.304583 | -0.009708 | -0.000891 | 0.018686  |
| H | -2.791874 | 8.507292  | 6.062207 | 0.011228  | 0.001101  | -0.019623 |

42 f = 28.309707 THz 177.875134 2PiTHz 944.310145 cm-1 117.079578  
meV

X Y Z dx dy dz

|    |           |           |          |           |           |           |
|----|-----------|-----------|----------|-----------|-----------|-----------|
| Li | 3.769818  | 9.645336  | 4.001386 | -0.002093 | 0.005349  | -0.002334 |
| Li | -1.316675 | 4.156264  | 2.365404 | -0.002102 | 0.005357  | -0.002335 |
| Li | -3.471104 | 2.744536  | 5.548798 | 0.002099  | 0.005356  | 0.002335  |
| Li | 5.924247  | 11.057064 | 0.817991 | 0.002096  | 0.005349  | 0.002335  |
| Na | 2.049025  | 6.784862  | 1.629696 | 0.000295  | 0.001841  | -0.000203 |
| Na | 0.404117  | 7.016739  | 4.737094 | 0.000295  | 0.001840  | -0.000199 |
| Na | 2.558546  | 13.685662 | 1.553699 | -0.000295 | 0.001842  | 0.000200  |
| Na | -0.105403 | 0.115939  | 4.813091 | -0.000295 | 0.001839  | 0.000203  |
| B  | 4.155007  | 8.978944  | 1.168663 | -0.044841 | -0.070430 | 0.025693  |
| B  | -1.701865 | 4.822656  | 5.198127 | -0.044811 | -0.070443 | 0.025736  |
| B  | 0.452564  | 2.078144  | 2.014732 | 0.044843  | -0.070442 | -0.025716 |
| B  | 2.000578  | 11.723457 | 4.352058 | 0.044819  | -0.070425 | -0.025710 |
| B  | -2.733891 | 11.746082 | 5.839177 | 0.007822  | -0.035690 | -0.053427 |
| B  | 5.187034  | 2.055518  | 0.527613 | 0.007776  | -0.035689 | -0.053447 |
| B  | 3.032605  | 4.845282  | 3.711007 | -0.007794 | -0.035681 | 0.053435  |
| B  | -0.579463 | 8.956318  | 2.655782 | -0.007792 | -0.035684 | 0.053416  |
| B  | -0.983708 | 0.054306  | 1.827988 | 0.002309  | -0.003186 | 0.000496  |
| B  | 3.436850  | 13.747295 | 4.538802 | 0.002311  | -0.003181 | 0.000492  |
| B  | 5.591279  | 6.955106  | 1.355407 | -0.002310 | -0.003192 | -0.000497 |
| B  | -3.138137 | 6.846495  | 5.011383 | -0.002309 | -0.003176 | -0.000491 |
| Si | 0.631772  | 3.486686  | 4.508512 | 0.015467  | -0.021620 | 0.011708  |
| Si | 1.821370  | 10.314915 | 1.858278 | 0.015482  | -0.021609 | 0.011738  |
| Si | -0.333059 | 10.387486 | 5.041673 | -0.015481 | -0.021629 | -0.011726 |
| Si | 2.786201  | 3.414115  | 1.325117 | -0.015472 | -0.021598 | -0.011711 |
| O  | 0.061445  | 3.072947  | 3.041906 | -0.015018 | 0.021641  | 0.014702  |
| O  | 2.391697  | 10.728653 | 3.324884 | -0.015038 | 0.021603  | 0.014611  |
| O  | 4.546126  | 9.973747  | 0.141489 | 0.015029  | 0.021625  | -0.014660 |
| O  | -2.092984 | 3.827853  | 6.225301 | 0.015024  | 0.021622  | -0.014664 |
| O  | 2.197450  | 3.933608  | 4.519003 | -0.005959 | 0.010528  | -0.016942 |
| O  | 0.255692  | 9.867992  | 1.847787 | -0.005966 | 0.010540  | -0.016956 |
| O  | -1.898737 | 10.834409 | 5.031182 | 0.005971  | 0.010535  | 0.016955  |
| O  | 4.351879  | 2.967192  | 1.335608 | 0.005953  | 0.010540  | 0.016951  |
| O  | -0.212316 | 4.798696  | 5.055280 | -0.003414 | 0.017059  | -0.002486 |
| O  | 2.665458  | 9.002905  | 1.311510 | -0.003411 | 0.017059  | -0.002481 |
| O  | 0.511030  | 11.699496 | 4.494905 | 0.003419  | 0.017066  | 0.002484  |
| O  | 1.942113  | 2.102105  | 1.871885 | 0.003411  | 0.017057  | 0.002483  |

|   |           |           |          |           |           |           |
|---|-----------|-----------|----------|-----------|-----------|-----------|
| O | 0.525580  | 2.169271  | 5.472081 | -0.000268 | 0.019851  | -0.004595 |
| O | 1.927562  | 11.632329 | 0.894709 | -0.000278 | 0.019834  | -0.004596 |
| O | -0.226867 | 9.070071  | 4.078104 | 0.000278  | 0.019858  | 0.004630  |
| O | 2.680009  | 4.731529  | 2.288686 | 0.000271  | 0.019816  | 0.004557  |
| O | 0.058846  | 0.698526  | 2.444964 | 0.020457  | 0.034430  | 0.010608  |
| O | 2.394296  | 13.103075 | 3.921826 | 0.020469  | 0.034439  | 0.010622  |
| O | 4.548725  | 7.599326  | 0.738431 | -0.020449 | 0.034421  | -0.010609 |
| O | -2.095583 | 6.202275  | 5.628359 | -0.020481 | 0.034450  | -0.010622 |
| O | -2.459230 | 13.184059 | 5.445139 | -0.017688 | 0.024537  | -0.015915 |
| O | 4.912372  | 0.617542  | 0.921651 | -0.017669 | 0.024528  | -0.015903 |
| O | 2.757943  | 6.283259  | 4.105046 | 0.017687  | 0.024544  | 0.015926  |
| O | -0.304801 | 7.518342  | 2.261744 | 0.017673  | 0.024516  | 0.015894  |
| O | -0.175430 | 2.374756  | 0.744070 | -0.013083 | 0.006574  | 0.009802  |
| O | 2.628573  | 11.426844 | 5.622720 | -0.013097 | 0.006588  | 0.009808  |
| O | 4.783002  | 9.275557  | 2.439325 | 0.013083  | 0.006590  | -0.009793 |
| O | -2.329859 | 4.526044  | 3.927465 | 0.013087  | 0.006571  | -0.009814 |
| O | -1.223866 | 12.517207 | 2.155216 | -0.002594 | -0.024869 | 0.003128  |
| O | 3.677009  | 1.284394  | 4.211574 | -0.002595 | -0.024880 | 0.003132  |
| O | 5.831438  | 5.616407  | 1.028179 | 0.002590  | -0.024855 | -0.003128 |
| O | -3.378295 | 8.185194  | 5.338611 | 0.002598  | -0.024896 | -0.003133 |
| H | -0.637445 | 12.195109 | 2.878812 | -0.031067 | -0.046287 | 0.022906  |
| H | 3.090587  | 1.606491  | 3.487978 | -0.031062 | -0.046315 | 0.022901  |
| H | 5.245016  | 5.294309  | 0.304583 | 0.031052  | -0.046318 | -0.022877 |
| H | -2.791874 | 8.507292  | 6.062207 | 0.031077  | -0.046293 | -0.022927 |

43 f = 27.901443 THz 175.309938 2PiTHz 930.691935 cm-1 115.391135 meV

|    | X         | Y         | Z        | dx        | dy        | dz        |
|----|-----------|-----------|----------|-----------|-----------|-----------|
| Li | 3.769818  | 9.645336  | 4.001386 | -0.001449 | 0.012014  | -0.000172 |
| Li | -1.316675 | 4.156264  | 2.365404 | 0.001428  | -0.011854 | 0.000184  |
| Li | -3.471104 | 2.744536  | 5.548798 | 0.001431  | 0.011856  | 0.000182  |
| Li | 5.924247  | 11.057064 | 0.817991 | -0.001444 | -0.012012 | -0.000173 |
| Na | 2.049025  | 6.784862  | 1.629696 | -0.000923 | 0.000159  | -0.000614 |
| Na | 0.404117  | 7.016739  | 4.737094 | 0.000918  | -0.000143 | 0.000620  |
| Na | 2.558546  | 13.685662 | 1.553699 | 0.000918  | 0.000143  | 0.000620  |
| Na | -0.105403 | 0.115939  | 4.813091 | -0.000922 | -0.000159 | -0.000614 |

|    |           |           |          |           |           |           |
|----|-----------|-----------|----------|-----------|-----------|-----------|
| B  | 4.155007  | 8.978944  | 1.168663 | 0.030786  | 0.028848  | -0.025584 |
| B  | -1.701865 | 4.822656  | 5.198127 | -0.030464 | -0.028362 | 0.025196  |
| B  | 0.452564  | 2.078144  | 2.014732 | -0.030466 | 0.028357  | 0.025226  |
| B  | 2.000578  | 11.723457 | 4.352058 | 0.030796  | -0.028852 | -0.025559 |
| B  | -2.733891 | 11.746082 | 5.839177 | 0.038046  | -0.039432 | -0.073644 |
| B  | 5.187034  | 2.055518  | 0.527613 | -0.037392 | 0.038978  | 0.072452  |
| B  | 3.032605  | 4.845282  | 3.711007 | -0.037389 | -0.038970 | 0.072442  |
| B  | -0.579463 | 8.956318  | 2.655782 | 0.038050  | 0.039437  | -0.073656 |
| B  | -0.983708 | 0.054306  | 1.827988 | -0.005611 | 0.005640  | 0.002301  |
| B  | 3.436850  | 13.747295 | 4.538802 | 0.005652  | -0.005538 | -0.002333 |
| B  | 5.591279  | 6.955106  | 1.355407 | 0.005652  | 0.005539  | -0.002335 |
| B  | -3.138137 | 6.846495  | 5.011383 | -0.005609 | -0.005641 | 0.002299  |
| Si | 0.631772  | 3.486686  | 4.508512 | 0.024230  | 0.011918  | -0.031548 |
| Si | 1.821370  | 10.314915 | 1.858278 | -0.024619 | -0.012079 | 0.032029  |
| Si | -0.333059 | 10.387486 | 5.041673 | -0.024606 | 0.012077  | 0.032024  |
| Si | 2.786201  | 3.414115  | 1.325117 | 0.024240  | -0.011922 | -0.031554 |
| O  | 0.061445  | 3.072947  | 3.041906 | 0.011428  | 0.000811  | 0.017836  |
| O  | 2.391697  | 10.728653 | 3.324884 | -0.011598 | -0.000863 | -0.018189 |
| O  | 4.546126  | 9.973747  | 0.141489 | -0.011603 | 0.000856  | -0.018184 |
| O  | -2.092984 | 3.827853  | 6.225301 | 0.011422  | -0.000820 | 0.017844  |
| O  | 2.197450  | 3.933608  | 4.519003 | -0.024674 | -0.001892 | -0.011366 |
| O  | 0.255692  | 9.867992  | 1.847787 | 0.025114  | 0.001956  | 0.011520  |
| O  | -1.898737 | 10.834409 | 5.031182 | 0.025100  | -0.001950 | 0.011522  |
| O  | 4.351879  | 2.967192  | 1.335608 | -0.024684 | 0.001895  | -0.011364 |
| O  | -0.212316 | 4.798696  | 5.055280 | -0.013030 | 0.019131  | 0.004128  |
| O  | 2.665458  | 9.002905  | 1.311510 | 0.013270  | -0.019411 | -0.004179 |
| O  | 0.511030  | 11.699496 | 4.494905 | 0.013261  | 0.019413  | -0.004179 |
| O  | 1.942113  | 2.102105  | 1.871885 | -0.013034 | -0.019125 | 0.004124  |
| O  | 0.525580  | 2.169271  | 5.472081 | -0.002889 | -0.037573 | 0.010575  |
| O  | 1.927562  | 11.632329 | 0.894709 | 0.002937  | 0.038072  | -0.010623 |
| O  | -0.226867 | 9.070071  | 4.078104 | 0.002934  | -0.038071 | -0.010613 |
| O  | 2.680009  | 4.731529  | 2.288686 | -0.002889 | 0.037575  | 0.010588  |
| O  | 0.058846  | 0.698526  | 2.444964 | 0.005735  | -0.010182 | -0.002728 |
| O  | 2.394296  | 13.103075 | 3.921826 | -0.005739 | 0.010441  | 0.002750  |
| O  | 4.548725  | 7.599326  | 0.738431 | -0.005737 | -0.010435 | 0.002756  |
| O  | -2.095583 | 6.202275  | 5.628359 | 0.005736  | 0.010190  | -0.002720 |



|   |           |           |          |           |           |           |
|---|-----------|-----------|----------|-----------|-----------|-----------|
| O | -2.459230 | 13.184059 | 5.445139 | -0.006194 | 0.017503  | 0.005833  |
| O | 4.912372  | 0.617542  | 0.921651 | 0.006166  | -0.017393 | -0.005649 |
| O | 2.757943  | 6.283259  | 4.105046 | 0.006161  | 0.017392  | -0.005649 |
| O | -0.304801 | 7.518342  | 2.261744 | -0.006198 | -0.017500 | 0.005835  |
| O | -0.175430 | 2.374756  | 0.744070 | 0.024862  | -0.005085 | -0.020563 |
| O | 2.628573  | 11.426844 | 5.622720 | -0.025318 | 0.005134  | 0.020888  |
| O | 4.783002  | 9.275557  | 2.439325 | -0.025304 | -0.005141 | 0.020890  |
| O | -2.329859 | 4.526044  | 3.927465 | 0.024873  | 0.005079  | -0.020562 |
| O | -1.223866 | 12.517207 | 2.155216 | -0.002585 | 0.003385  | -0.005298 |
| O | 3.677009  | 1.284394  | 4.211574 | 0.002511  | -0.003540 | 0.005271  |
| O | 5.831438  | 5.616407  | 1.028179 | 0.002511  | 0.003540  | 0.005269  |
| O | -3.378295 | 8.185194  | 5.338611 | -0.002585 | -0.003385 | -0.005299 |
| H | -0.637445 | 12.195109 | 2.878812 | 0.001727  | 0.058640  | 0.017613  |
| H | 3.090587  | 1.606491  | 3.487978 | -0.001656 | -0.058223 | -0.017469 |
| H | 5.245016  | 5.294309  | 0.304583 | -0.001661 | 0.058217  | -0.017464 |
| H | -2.791874 | 8.507292  | 6.062207 | 0.001715  | -0.058649 | 0.017627  |

44 f = 27.864286 THz 175.076473 2PiTHz 929.452512 cm-1 115.237466 meV

|    | X         | Y         | Z        | dx        | dy        | dz        |
|----|-----------|-----------|----------|-----------|-----------|-----------|
| Li | 3.769818  | 9.645336  | 4.001386 | -0.000705 | 0.009630  | 0.001309  |
| Li | -1.316675 | 4.156264  | 2.365404 | -0.000726 | 0.009817  | 0.001315  |
| Li | -3.471104 | 2.744536  | 5.548798 | -0.000721 | -0.009811 | 0.001315  |
| Li | 5.924247  | 11.057064 | 0.817991 | -0.000707 | -0.009637 | 0.001310  |
| Na | 2.049025  | 6.784862  | 1.629696 | -0.000337 | 0.000950  | -0.000086 |
| Na | 0.404117  | 7.016739  | 4.737094 | -0.000350 | 0.000955  | -0.000093 |
| Na | 2.558546  | 13.685662 | 1.553699 | -0.000351 | -0.000954 | -0.000093 |
| Na | -0.105403 | 0.115939  | 4.813091 | -0.000336 | -0.000952 | -0.000086 |
| B  | 4.155007  | 8.978944  | 1.168663 | 0.017273  | 0.026862  | -0.018068 |
| B  | -1.701865 | 4.822656  | 5.198127 | 0.017619  | 0.027220  | -0.018398 |
| B  | 0.452564  | 2.078144  | 2.014732 | 0.017695  | -0.027231 | -0.018418 |
| B  | 2.000578  | 11.723457 | 4.352058 | 0.017209  | -0.026833 | -0.018047 |
| B  | -2.733891 | 11.746082 | 5.839177 | 0.045460  | -0.032090 | -0.079480 |
| B  | 5.187034  | 2.055518  | 0.527613 | 0.046067  | -0.032726 | -0.080668 |
| B  | 3.032605  | 4.845282  | 3.711007 | 0.046034  | 0.032721  | -0.080646 |
| B  | -0.579463 | 8.956318  | 2.655782 | 0.045489  | 0.032107  | -0.079514 |

|    |           |           |          |           |           |           |
|----|-----------|-----------|----------|-----------|-----------|-----------|
| B  | -0.983708 | 0.054306  | 1.827988 | 0.003258  | 0.006632  | -0.001762 |
| B  | 3.436850  | 13.747295 | 4.538802 | 0.003164  | 0.006715  | -0.001724 |
| B  | 5.591279  | 6.955106  | 1.355407 | 0.003169  | -0.006718 | -0.001726 |
| B  | -3.138137 | 6.846495  | 5.011383 | 0.003250  | -0.006626 | -0.001761 |
| Si | 0.631772  | 3.486686  | 4.508512 | -0.024887 | -0.013244 | 0.030522  |
| Si | 1.821370  | 10.314915 | 1.858278 | -0.024482 | -0.013021 | 0.030050  |
| Si | -0.333059 | 10.387486 | 5.041673 | -0.024487 | 0.013026  | 0.030061  |
| Si | 2.786201  | 3.414115  | 1.325117 | -0.024868 | 0.013251  | 0.030513  |
| O  | 0.061445  | 3.072947  | 3.041906 | -0.010243 | -0.004607 | -0.024473 |
| O  | 2.391697  | 10.728653 | 3.324884 | -0.010077 | -0.004610 | -0.024239 |
| O  | 4.546126  | 9.973747  | 0.141489 | -0.010089 | 0.004602  | -0.024230 |
| O  | -2.092984 | 3.827853  | 6.225301 | -0.010234 | 0.004611  | -0.024481 |
| O  | 2.197450  | 3.933608  | 4.519003 | 0.027682  | 0.003604  | 0.011176  |
| O  | 0.255692  | 9.867992  | 1.847787 | 0.027258  | 0.003552  | 0.011004  |
| O  | -1.898737 | 10.834409 | 5.031182 | 0.027284  | -0.003562 | 0.010998  |
| O  | 4.351879  | 2.967192  | 1.335608 | 0.027643  | -0.003587 | 0.011179  |
| O  | -0.212316 | 4.798696  | 5.055280 | 0.014531  | -0.014800 | -0.002369 |
| O  | 2.665458  | 9.002905  | 1.311510 | 0.014286  | -0.014508 | -0.002289 |
| O  | 0.511030  | 11.699496 | 4.494905 | 0.014312  | 0.014522  | -0.002301 |
| O  | 1.942113  | 2.102105  | 1.871885 | 0.014482  | 0.014767  | -0.002348 |
| O  | 0.525580  | 2.169271  | 5.472081 | 0.003616  | 0.034488  | -0.002414 |
| O  | 1.927562  | 11.632329 | 0.894709 | 0.003567  | 0.033870  | -0.002253 |
| O  | -0.226867 | 9.070071  | 4.078104 | 0.003563  | -0.033884 | -0.002260 |
| O  | 2.680009  | 4.731529  | 2.288686 | 0.003618  | -0.034485 | -0.002415 |
| O  | 0.058846  | 0.698526  | 2.444964 | 0.001567  | 0.016747  | 0.001899  |
| O  | 2.394296  | 13.103075 | 3.921826 | 0.001636  | 0.016591  | 0.001849  |
| O  | 4.548725  | 7.599326  | 0.738431 | 0.001651  | -0.016613 | 0.001859  |
| O  | -2.095583 | 6.202275  | 5.628359 | 0.001557  | -0.016732 | 0.001892  |
| O  | -2.459230 | 13.184059 | 5.445139 | -0.003582 | 0.008153  | 0.010860  |
| O  | 4.912372  | 0.617542  | 0.921651 | -0.003699 | 0.008431  | 0.010934  |
| O  | 2.757943  | 6.283259  | 4.105046 | -0.003684 | -0.008421 | 0.010949  |
| O  | -0.304801 | 7.518342  | 2.261744 | -0.003600 | -0.008168 | 0.010844  |
| O  | -0.175430 | 2.374756  | 0.744070 | -0.029463 | 0.003710  | 0.020061  |
| O  | 2.628573  | 11.426844 | 5.622720 | -0.029088 | 0.003634  | 0.019746  |
| O  | 4.783002  | 9.275557  | 2.439325 | -0.029107 | -0.003630 | 0.019752  |
| O  | -2.329859 | 4.526044  | 3.927465 | -0.029443 | -0.003719 | 0.020060  |

|   |           |           |          |           |           |           |
|---|-----------|-----------|----------|-----------|-----------|-----------|
| O | -1.223866 | 12.517207 | 2.155216 | -0.004869 | -0.011370 | -0.001421 |
| O | 3.677009  | 1.284394  | 4.211574 | -0.004905 | -0.011300 | -0.001509 |
| O | 5.831438  | 5.616407  | 1.028179 | -0.004907 | 0.011321  | -0.001503 |
| O | -3.378295 | 8.185194  | 5.338611 | -0.004866 | 0.011353  | -0.001428 |
| H | -0.637445 | 12.195109 | 2.878812 | 0.002194  | 0.025059  | 0.011155  |
| H | 3.090587  | 1.606491  | 3.487978 | 0.002197  | 0.025974  | 0.011438  |
| H | 5.245016  | 5.294309  | 0.304583 | 0.002180  | -0.025958 | 0.011455  |
| H | -2.791874 | 8.507292  | 6.062207 | 0.002189  | -0.025077 | 0.011158  |

45 f = 27.602827 THz 173.433678 2PiTHz 920.731179 cm-1 114.156158 meV

|    | X         | Y         | Z        | dx        | dy        | dz        |
|----|-----------|-----------|----------|-----------|-----------|-----------|
| Li | 3.769818  | 9.645336  | 4.001386 | 0.004335  | -0.003175 | 0.002229  |
| Li | -1.316675 | 4.156264  | 2.365404 | -0.004423 | 0.003180  | -0.002278 |
| Li | -3.471104 | 2.744536  | 5.548798 | 0.004427  | 0.003190  | 0.002282  |
| Li | 5.924247  | 11.057064 | 0.817991 | -0.004332 | -0.003166 | -0.002226 |
| Na | 2.049025  | 6.784862  | 1.629696 | -0.000508 | -0.000956 | -0.000014 |
| Na | 0.404117  | 7.016739  | 4.737094 | 0.000517  | 0.000970  | 0.000005  |
| Na | 2.558546  | 13.685662 | 1.553699 | -0.000516 | 0.000971  | -0.000005 |
| Na | -0.105403 | 0.115939  | 4.813091 | 0.000509  | -0.000953 | 0.000014  |
| B  | 4.155007  | 8.978944  | 1.168663 | 0.071004  | 0.013945  | 0.005904  |
| B  | -1.701865 | 4.822656  | 5.198127 | -0.072138 | -0.014068 | -0.006103 |
| B  | 0.452564  | 2.078144  | 2.014732 | 0.072125  | -0.013999 | 0.006166  |
| B  | 2.000578  | 11.723457 | 4.352058 | -0.070982 | 0.014004  | -0.005870 |
| B  | -2.733891 | 11.746082 | 5.839177 | -0.035331 | -0.004073 | 0.014064  |
| B  | 5.187034  | 2.055518  | 0.527613 | 0.035951  | 0.004354  | -0.014085 |
| B  | 3.032605  | 4.845282  | 3.711007 | -0.035977 | 0.004365  | 0.014115  |
| B  | -0.579463 | 8.956318  | 2.655782 | 0.035297  | -0.004075 | -0.014012 |
| B  | -0.983708 | 0.054306  | 1.827988 | 0.008634  | 0.006075  | 0.002207  |
| B  | 3.436850  | 13.747295 | 4.538802 | -0.008503 | -0.005952 | -0.002141 |
| B  | 5.591279  | 6.955106  | 1.355407 | 0.008507  | -0.005945 | 0.002148  |
| B  | -3.138137 | 6.846495  | 5.011383 | -0.008629 | 0.006084  | -0.002200 |
| Si | 0.631772  | 3.486686  | 4.508512 | -0.026286 | 0.010631  | 0.016440  |
| Si | 1.821370  | 10.314915 | 1.858278 | 0.025738  | -0.010348 | -0.016224 |
| Si | -0.333059 | 10.387486 | 5.041673 | -0.025723 | -0.010327 | 0.016193  |
| Si | 2.786201  | 3.414115  | 1.325117 | 0.026307  | 0.010654  | -0.016479 |

|   |           |           |          |           |           |           |
|---|-----------|-----------|----------|-----------|-----------|-----------|
| O | 0.061445  | 3.072947  | 3.041906 | -0.007514 | -0.002533 | -0.010164 |
| O | 2.391697  | 10.728653 | 3.324884 | 0.007474  | 0.002403  | 0.009934  |
| O | 4.546126  | 9.973747  | 0.141489 | -0.007458 | 0.002403  | -0.009904 |
| O | -2.092984 | 3.827853  | 6.225301 | 0.007537  | -0.002532 | 0.010191  |
| O | 2.197450  | 3.933608  | 4.519003 | 0.043290  | 0.024958  | -0.012141 |
| O | 0.255692  | 9.867992  | 1.847787 | -0.042486 | -0.024548 | 0.011992  |
| O | -1.898737 | 10.834409 | 5.031182 | 0.042471  | -0.024541 | -0.011999 |
| O | 4.351879  | 2.967192  | 1.335608 | -0.043326 | 0.024977  | 0.012148  |
| O | -0.212316 | 4.798696  | 5.055280 | 0.056789  | -0.035774 | -0.022969 |
| O | 2.665458  | 9.002905  | 1.311510 | -0.055724 | 0.035109  | 0.022560  |
| O | 0.511030  | 11.699496 | 4.494905 | 0.055677  | 0.035064  | -0.022543 |
| O | 1.942113  | 2.102105  | 1.871885 | -0.056826 | -0.035826 | 0.022984  |
| O | 0.525580  | 2.169271  | 5.472081 | -0.002147 | -0.003392 | 0.000016  |
| O | 1.927562  | 11.632329 | 0.894709 | 0.002124  | 0.003204  | 0.000054  |
| O | -0.226867 | 9.070071  | 4.078104 | -0.002121 | 0.003199  | -0.000072 |
| O | 2.680009  | 4.731529  | 2.288686 | 0.002154  | -0.003393 | -0.000021 |
| O | 0.058846  | 0.698526  | 2.444964 | 0.004712  | 0.014821  | 0.000012  |
| O | 2.394296  | 13.103075 | 3.921826 | -0.004673 | -0.014635 | -0.000066 |
| O | 4.548725  | 7.599326  | 0.738431 | 0.004670  | -0.014610 | 0.000064  |
| O | -2.095583 | 6.202275  | 5.628359 | -0.004713 | 0.014849  | -0.000016 |
| O | -2.459230 | 13.184059 | 5.445139 | 0.007526  | 0.000177  | 0.007542  |
| O | 4.912372  | 0.617542  | 0.921651 | -0.007580 | -0.000308 | -0.007642 |
| O | 2.757943  | 6.283259  | 4.105046 | 0.007575  | -0.000303 | 0.007633  |
| O | -0.304801 | 7.518342  | 2.261744 | -0.007530 | 0.000178  | -0.007553 |
| O | -0.175430 | 2.374756  | 0.744070 | -0.025522 | -0.004767 | -0.010105 |
| O | 2.628573  | 11.426844 | 5.622720 | 0.025095  | 0.004639  | 0.009856  |
| O | 4.783002  | 9.275557  | 2.439325 | -0.025075 | 0.004640  | -0.009877 |
| O | -2.329859 | 4.526044  | 3.927465 | 0.025548  | -0.004764 | 0.010070  |
| O | -1.223866 | 12.517207 | 2.155216 | -0.000985 | -0.011984 | 0.002837  |
| O | 3.677009  | 1.284394  | 4.211574 | 0.000907  | 0.011877  | -0.002808 |
| O | 5.831438  | 5.616407  | 1.028179 | -0.000902 | 0.011868  | 0.002809  |
| O | -3.378295 | 8.185194  | 5.338611 | 0.000989  | -0.011998 | -0.002837 |
| H | -0.637445 | 12.195109 | 2.878812 | -0.024475 | -0.016831 | 0.017806  |
| H | 3.090587  | 1.606491  | 3.487978 | 0.025050  | 0.016238  | -0.018515 |
| H | 5.245016  | 5.294309  | 0.304583 | -0.025054 | 0.016268  | 0.018503  |
| H | -2.791874 | 8.507292  | 6.062207 | 0.024483  | -0.016788 | -0.017833 |

46 f = 27.593395 THz 173.374416 2PiTHz 920.416568 cm-1 114.117151  
meV

|    | X         | Y         | Z        | dx        | dy        | dz        |
|----|-----------|-----------|----------|-----------|-----------|-----------|
| Li | 3.769818  | 9.645336  | 4.001386 | -0.004861 | 0.000670  | -0.003156 |
| Li | -1.316675 | 4.156264  | 2.365404 | -0.004780 | 0.000614  | -0.003113 |
| Li | -3.471104 | 2.744536  | 5.548798 | 0.004779  | 0.000613  | 0.003113  |
| Li | 5.924247  | 11.057064 | 0.817991 | 0.004865  | 0.000676  | 0.003158  |
| Na | 2.049025  | 6.784862  | 1.629696 | 0.000476  | 0.000874  | -0.000368 |
| Na | 0.404117  | 7.016739  | 4.737094 | 0.000465  | 0.000856  | -0.000360 |
| Na | 2.558546  | 13.685662 | 1.553699 | -0.000465 | 0.000857  | 0.000360  |
| Na | -0.105403 | 0.115939  | 4.813091 | -0.000475 | 0.000874  | 0.000368  |
| B  | 4.155007  | 8.978944  | 1.168663 | -0.061327 | -0.003858 | -0.010663 |
| B  | -1.701865 | 4.822656  | 5.198127 | -0.059991 | -0.003552 | -0.010564 |
| B  | 0.452564  | 2.078144  | 2.014732 | 0.059981  | -0.003552 | 0.010587  |
| B  | 2.000578  | 11.723457 | 4.352058 | 0.061292  | -0.003812 | 0.010693  |
| B  | -2.733891 | 11.746082 | 5.839177 | 0.035043  | 0.015653  | -0.003808 |
| B  | 5.187034  | 2.055518  | 0.527613 | 0.034377  | 0.015569  | -0.003554 |
| B  | 3.032605  | 4.845282  | 3.711007 | -0.034365 | 0.015570  | 0.003537  |
| B  | -0.579463 | 8.956318  | 2.655782 | -0.035043 | 0.015668  | 0.003811  |
| B  | -0.983708 | 0.054306  | 1.827988 | 0.006643  | 0.006903  | 0.002939  |
| B  | 3.436850  | 13.747295 | 4.538802 | 0.006803  | 0.007019  | 0.002980  |
| B  | 5.591279  | 6.955106  | 1.355407 | -0.006801 | 0.007020  | -0.002977 |
| B  | -3.138137 | 6.846495  | 5.011383 | -0.006641 | 0.006905  | -0.002938 |
| Si | 0.631772  | 3.486686  | 4.508512 | -0.029696 | 0.016814  | 0.013295  |
| Si | 1.821370  | 10.314915 | 1.858278 | -0.030184 | 0.017021  | 0.013602  |
| Si | -0.333059 | 10.387486 | 5.041673 | 0.030193  | 0.017029  | -0.013621 |
| Si | 2.786201  | 3.414115  | 1.325117 | 0.029701  | 0.016825  | -0.013301 |
| O  | 0.061445  | 3.072947  | 3.041906 | -0.003856 | -0.006145 | -0.013159 |
| O  | 2.391697  | 10.728653 | 3.324884 | -0.003995 | -0.006193 | -0.013352 |
| O  | 4.546126  | 9.973747  | 0.141489 | 0.004007  | -0.006186 | 0.013352  |
| O  | -2.092984 | 3.827853  | 6.225301 | 0.003864  | -0.006146 | 0.013166  |
| O  | 2.197450  | 3.933608  | 4.519003 | 0.043207  | 0.022172  | -0.007838 |
| O  | 0.255692  | 9.867992  | 1.847787 | 0.044008  | 0.022632  | -0.008065 |
| O  | -1.898737 | 10.834409 | 5.031182 | -0.044027 | 0.022644  | 0.008074  |
| O  | 4.351879  | 2.967192  | 1.335608 | -0.043220 | 0.022179  | 0.007846  |

|   |           |           |          |           |           |           |
|---|-----------|-----------|----------|-----------|-----------|-----------|
| O | -0.212316 | 4.798696  | 5.055280 | 0.058605  | -0.038691 | -0.022876 |
| O | 2.665458  | 9.002905  | 1.311510 | 0.059659  | -0.039354 | -0.023307 |
| O | 0.511030  | 11.699496 | 4.494905 | -0.059663 | -0.039380 | 0.023312  |
| O | 1.942113  | 2.102105  | 1.871885 | -0.058611 | -0.038705 | 0.022882  |
| O | 0.525580  | 2.169271  | 5.472081 | -0.001742 | -0.010930 | 0.005030  |
| O | 1.927562  | 11.632329 | 0.894709 | -0.001782 | -0.011007 | 0.005034  |
| O | -0.226867 | 9.070071  | 4.078104 | 0.001787  | -0.011001 | -0.005026 |
| O | 2.680009  | 4.731529  | 2.288686 | 0.001745  | -0.010938 | -0.005028 |
| O | 0.058846  | 0.698526  | 2.444964 | 0.002289  | 0.010722  | -0.002142 |
| O | 2.394296  | 13.103075 | 3.921826 | 0.002376  | 0.010994  | -0.002143 |
| O | 4.548725  | 7.599326  | 0.738431 | -0.002371 | 0.011006  | 0.002141  |
| O | -2.095583 | 6.202275  | 5.628359 | -0.002286 | 0.010719  | 0.002139  |
| O | -2.459230 | 13.184059 | 5.445139 | -0.003010 | -0.007577 | -0.004669 |
| O | 4.912372  | 0.617542  | 0.921651 | -0.002874 | -0.007565 | -0.004532 |
| O | 2.757943  | 6.283259  | 4.105046 | 0.002872  | -0.007559 | 0.004535  |
| O | -0.304801 | 7.518342  | 2.261744 | 0.003007  | -0.007583 | 0.004662  |
| O | -0.175430 | 2.374756  | 0.744070 | -0.023062 | -0.005943 | -0.011905 |
| O | 2.628573  | 11.426844 | 5.622720 | -0.023534 | -0.006029 | -0.012096 |
| O | 4.783002  | 9.275557  | 2.439325 | 0.023544  | -0.006025 | 0.012088  |
| O | -2.329859 | 4.526044  | 3.927465 | 0.023060  | -0.005941 | 0.011891  |
| O | -1.223866 | 12.517207 | 2.155216 | -0.004411 | -0.005769 | 0.001250  |
| O | 3.677009  | 1.284394  | 4.211574 | -0.004428 | -0.005988 | 0.001298  |
| O | 5.831438  | 5.616407  | 1.028179 | 0.004430  | -0.005985 | -0.001296 |
| O | -3.378295 | 8.185194  | 5.338611 | 0.004410  | -0.005772 | -0.001250 |
| H | -0.637445 | 12.195109 | 2.878812 | 0.032016  | -0.026738 | -0.036914 |
| H | 3.090587  | 1.606491  | 3.487978 | 0.031537  | -0.027019 | -0.036549 |
| H | 5.245016  | 5.294309  | 0.304583 | -0.031544 | -0.027027 | 0.036562  |
| H | -2.791874 | 8.507292  | 6.062207 | -0.032018 | -0.026707 | 0.036897  |

47 f = 27.469876 THz 172.598319 2PiTHz 916.296394 cm-1 113.606315 meV

|    | X         | Y         | Z        | dx       | dy        | dz       |
|----|-----------|-----------|----------|----------|-----------|----------|
| Li | 3.769818  | 9.645336  | 4.001386 | 0.003321 | -0.003614 | 0.002510 |
| Li | -1.316675 | 4.156264  | 2.365404 | 0.003357 | -0.003639 | 0.002528 |
| Li | -3.471104 | 2.744536  | 5.548798 | 0.003349 | 0.003635  | 0.002523 |
| Li | 5.924247  | 11.057064 | 0.817991 | 0.003324 | 0.003616  | 0.002513 |

|    |           |           |          |           |           |           |
|----|-----------|-----------|----------|-----------|-----------|-----------|
| Na | 2.049025  | 6.784862  | 1.629696 | 0.000653  | -0.000549 | 0.000007  |
| Na | 0.404117  | 7.016739  | 4.737094 | 0.000655  | -0.000542 | 0.000003  |
| Na | 2.558546  | 13.685662 | 1.553699 | 0.000655  | 0.000542  | 0.000003  |
| Na | -0.105403 | 0.115939  | 4.813091 | 0.000653  | 0.000549  | 0.000008  |
| B  | 4.155007  | 8.978944  | 1.168663 | -0.027320 | -0.057655 | 0.048258  |
| B  | -1.701865 | 4.822656  | 5.198127 | -0.027484 | -0.058078 | 0.048608  |
| B  | 0.452564  | 2.078144  | 2.014732 | -0.027524 | 0.058098  | 0.048606  |
| B  | 2.000578  | 11.723457 | 4.352058 | -0.027328 | 0.057647  | 0.048256  |
| B  | -2.733891 | 11.746082 | 5.839177 | 0.026842  | -0.028897 | -0.025664 |
| B  | 5.187034  | 2.055518  | 0.527613 | 0.026966  | -0.029166 | -0.025794 |
| B  | 3.032605  | 4.845282  | 3.711007 | 0.027002  | 0.029129  | -0.025787 |
| B  | -0.579463 | 8.956318  | 2.655782 | 0.026831  | 0.028916  | -0.025676 |
| B  | -0.983708 | 0.054306  | 1.827988 | 0.007372  | 0.002358  | 0.006024  |
| B  | 3.436850  | 13.747295 | 4.538802 | 0.007312  | 0.002329  | 0.005997  |
| B  | 5.591279  | 6.955106  | 1.355407 | 0.007314  | -0.002325 | 0.005994  |
| B  | -3.138137 | 6.846495  | 5.011383 | 0.007376  | -0.002367 | 0.006029  |
| Si | 0.631772  | 3.486686  | 4.508512 | 0.003877  | -0.039673 | -0.017986 |
| Si | 1.821370  | 10.314915 | 1.858278 | 0.003795  | -0.039372 | -0.017813 |
| Si | -0.333059 | 10.387486 | 5.041673 | 0.003814  | 0.039398  | -0.017810 |
| Si | 2.786201  | 3.414115  | 1.325117 | 0.003836  | 0.039633  | -0.017978 |
| O  | 0.061445  | 3.072947  | 3.041906 | 0.019091  | -0.011711 | 0.003252  |
| O  | 2.391697  | 10.728653 | 3.324884 | 0.018947  | -0.011642 | 0.003194  |
| O  | 4.546126  | 9.973747  | 0.141489 | 0.018942  | 0.011637  | 0.003193  |
| O  | -2.092984 | 3.827853  | 6.225301 | 0.019094  | 0.011717  | 0.003244  |
| O  | 2.197450  | 3.933608  | 4.519003 | -0.010406 | -0.009943 | 0.012752  |
| O  | 0.255692  | 9.867992  | 1.847787 | -0.010267 | -0.009841 | 0.012663  |
| O  | -1.898737 | 10.834409 | 5.031182 | -0.010280 | 0.009844  | 0.012658  |
| O  | 4.351879  | 2.967192  | 1.335608 | -0.010359 | 0.009926  | 0.012754  |
| O  | -0.212316 | 4.798696  | 5.055280 | -0.025215 | 0.053079  | 0.018126  |
| O  | 2.665458  | 9.002905  | 1.311510 | -0.024934 | 0.052627  | 0.017961  |
| O  | 0.511030  | 11.699496 | 4.494905 | -0.024967 | -0.052653 | 0.017972  |
| O  | 1.942113  | 2.102105  | 1.871885 | -0.025136 | -0.053026 | 0.018095  |
| O  | 0.525580  | 2.169271  | 5.472081 | 0.006824  | 0.022600  | -0.004271 |
| O  | 1.927562  | 11.632329 | 0.894709 | 0.006774  | 0.022451  | -0.004231 |
| O  | -0.226867 | 9.070071  | 4.078104 | 0.006773  | -0.022472 | -0.004251 |
| O  | 2.680009  | 4.731529  | 2.288686 | 0.006823  | -0.022568 | -0.004244 |

|   |           |           |          |           |           |           |
|---|-----------|-----------|----------|-----------|-----------|-----------|
| O | 0.058846  | 0.698526  | 2.444964 | 0.015792  | -0.001539 | -0.001848 |
| O | 2.394296  | 13.103075 | 3.921826 | 0.015677  | -0.001518 | -0.001854 |
| O | 4.548725  | 7.599326  | 0.738431 | 0.015680  | 0.001517  | -0.001845 |
| O | -2.095583 | 6.202275  | 5.628359 | 0.015795  | 0.001527  | -0.001858 |
| O | -2.459230 | 13.184059 | 5.445139 | -0.013484 | 0.013695  | -0.010101 |
| O | 4.912372  | 0.617542  | 0.921651 | -0.013580 | 0.013822  | -0.010196 |
| O | 2.757943  | 6.283259  | 4.105046 | -0.013576 | -0.013799 | -0.010194 |
| O | -0.304801 | 7.518342  | 2.261744 | -0.013492 | -0.013713 | -0.010107 |
| O | -0.175430 | 2.374756  | 0.744070 | -0.006090 | -0.005209 | -0.012121 |
| O | 2.628573  | 11.426844 | 5.622720 | -0.006092 | -0.005179 | -0.012035 |
| O | 4.783002  | 9.275557  | 2.439325 | -0.006090 | 0.005175  | -0.012027 |
| O | -2.329859 | 4.526044  | 3.927465 | -0.006112 | 0.005214  | -0.012134 |
| O | -1.223866 | 12.517207 | 2.155216 | 0.000457  | -0.013191 | 0.004665  |
| O | 3.677009  | 1.284394  | 4.211574 | 0.000478  | -0.013084 | 0.004628  |
| O | 5.831438  | 5.616407  | 1.028179 | 0.000475  | 0.013097  | 0.004637  |
| O | -3.378295 | 8.185194  | 5.338611 | 0.000457  | 0.013187  | 0.004658  |
| H | -0.637445 | 12.195109 | 2.878812 | -0.011665 | -0.015330 | 0.009955  |
| H | 3.090587  | 1.606491  | 3.487978 | -0.011849 | -0.015233 | 0.010039  |
| H | 5.245016  | 5.294309  | 0.304583 | -0.011774 | 0.015251  | 0.009981  |
| H | -2.791874 | 8.507292  | 6.062207 | -0.011723 | 0.015334  | 0.009993  |

48 f = 27.355795 THz 171.881531 2PiTHz 912.491084 cm-1 113.134516 meV

|    | X         | Y         | Z        | dx        | dy        | dz        |
|----|-----------|-----------|----------|-----------|-----------|-----------|
| Li | 3.769818  | 9.645336  | 4.001386 | 0.002821  | -0.000965 | 0.001413  |
| Li | -1.316675 | 4.156264  | 2.365404 | -0.002807 | 0.000949  | -0.001398 |
| Li | -3.471104 | 2.744536  | 5.548798 | -0.002806 | -0.000948 | -0.001398 |
| Li | 5.924247  | 11.057064 | 0.817991 | 0.002820  | 0.000965  | 0.001413  |
| Na | 2.049025  | 6.784862  | 1.629696 | 0.000234  | 0.001035  | -0.000312 |
| Na | 0.404117  | 7.016739  | 4.737094 | -0.000232 | -0.001039 | 0.000314  |
| Na | 2.558546  | 13.685662 | 1.553699 | -0.000233 | 0.001039  | 0.000315  |
| Na | -0.105403 | 0.115939  | 4.813091 | 0.000234  | -0.001035 | -0.000311 |
| B  | 4.155007  | 8.978944  | 1.168663 | -0.019733 | -0.052448 | 0.041828  |
| B  | -1.701865 | 4.822656  | 5.198127 | 0.019558  | 0.052066  | -0.041485 |
| B  | 0.452564  | 2.078144  | 2.014732 | 0.019557  | -0.052079 | -0.041494 |
| B  | 2.000578  | 11.723457 | 4.352058 | -0.019753 | 0.052444  | 0.041824  |



|    |           |           |          |           |           |           |
|----|-----------|-----------|----------|-----------|-----------|-----------|
| B  | -2.733891 | 11.746082 | 5.839177 | 0.027933  | -0.032899 | -0.031501 |
| B  | 5.187034  | 2.055518  | 0.527613 | -0.027680 | 0.032709  | 0.031230  |
| B  | 3.032605  | 4.845282  | 3.711007 | -0.027678 | -0.032707 | 0.031239  |
| B  | -0.579463 | 8.956318  | 2.655782 | 0.027938  | 0.032893  | -0.031498 |
| B  | -0.983708 | 0.054306  | 1.827988 | -0.009819 | -0.004726 | -0.003708 |
| B  | 3.436850  | 13.747295 | 4.538802 | 0.009880  | 0.004754  | 0.003752  |
| B  | 5.591279  | 6.955106  | 1.355407 | 0.009880  | -0.004754 | 0.003751  |
| B  | -3.138137 | 6.846495  | 5.011383 | -0.009821 | 0.004728  | -0.003710 |
| Si | 0.631772  | 3.486686  | 4.508512 | -0.003136 | 0.040091  | 0.017770  |
| Si | 1.821370  | 10.314915 | 1.858278 | 0.003162  | -0.040392 | -0.017882 |
| Si | -0.333059 | 10.387486 | 5.041673 | 0.003157  | 0.040390  | -0.017880 |
| Si | 2.786201  | 3.414115  | 1.325117 | -0.003135 | -0.040091 | 0.017770  |
| O  | 0.061445  | 3.072947  | 3.041906 | -0.018580 | 0.009989  | -0.006047 |
| O  | 2.391697  | 10.728653 | 3.324884 | 0.018716  | -0.010073 | 0.006064  |
| O  | 4.546126  | 9.973747  | 0.141489 | 0.018716  | 0.010077  | 0.006059  |
| O  | -2.092984 | 3.827853  | 6.225301 | -0.018580 | -0.009983 | -0.006051 |
| O  | 2.197450  | 3.933608  | 4.519003 | 0.008763  | 0.010518  | -0.013306 |
| O  | 0.255692  | 9.867992  | 1.847787 | -0.008827 | -0.010589 | 0.013401  |
| O  | -1.898737 | 10.834409 | 5.031182 | -0.008818 | 0.010586  | 0.013402  |
| O  | 4.351879  | 2.967192  | 1.335608 | 0.008762  | -0.010520 | -0.013307 |
| O  | -0.212316 | 4.798696  | 5.055280 | 0.030039  | -0.053731 | -0.019267 |
| O  | 2.665458  | 9.002905  | 1.311510 | -0.030239 | 0.054117  | 0.019403  |
| O  | 0.511030  | 11.699496 | 4.494905 | -0.030227 | -0.054114 | 0.019399  |
| O  | 1.942113  | 2.102105  | 1.871885 | 0.030037  | 0.053728  | -0.019265 |
| O  | 0.525580  | 2.169271  | 5.472081 | -0.006848 | -0.022032 | 0.003368  |
| O  | 1.927562  | 11.632329 | 0.894709 | 0.006893  | 0.022198  | -0.003384 |
| O  | -0.226867 | 9.070071  | 4.078104 | 0.006892  | -0.022193 | -0.003381 |
| O  | 2.680009  | 4.731529  | 2.288686 | -0.006848 | 0.022033  | 0.003365  |
| O  | 0.058846  | 0.698526  | 2.444964 | -0.017285 | -0.001500 | -0.001207 |
| O  | 2.394296  | 13.103075 | 3.921826 | 0.017429  | 0.001530  | 0.001203  |
| O  | 4.548725  | 7.599326  | 0.738431 | 0.017425  | -0.001529 | 0.001203  |
| O  | -2.095583 | 6.202275  | 5.628359 | -0.017294 | 0.001509  | -0.001208 |
| O  | -2.459230 | 13.184059 | 5.445139 | -0.014566 | 0.014991  | -0.011370 |
| O  | 4.912372  | 0.617542  | 0.921651 | 0.014450  | -0.014888 | 0.011292  |
| O  | 2.757943  | 6.283259  | 4.105046 | 0.014453  | 0.014893  | 0.011296  |
| O  | -0.304801 | 7.518342  | 2.261744 | -0.014567 | -0.014988 | -0.011368 |

|   |           |           |          |           |           |           |
|---|-----------|-----------|----------|-----------|-----------|-----------|
| O | -0.175430 | 2.374756  | 0.744070 | 0.006387  | 0.004297  | 0.009429  |
| O | 2.628573  | 11.426844 | 5.622720 | -0.006468 | -0.004333 | -0.009503 |
| O | 4.783002  | 9.275557  | 2.439325 | -0.006474 | 0.004333  | -0.009506 |
| O | -2.329859 | 4.526044  | 3.927465 | 0.006388  | -0.004297 | 0.009424  |
| O | -1.223866 | 12.517207 | 2.155216 | 0.003208  | 0.014695  | -0.004963 |
| O | 3.677009  | 1.284394  | 4.211574 | -0.003210 | -0.014815 | 0.005002  |
| O | 5.831438  | 5.616407  | 1.028179 | -0.003209 | 0.014815  | 0.005001  |
| O | -3.378295 | 8.185194  | 5.338611 | 0.003210  | -0.014703 | -0.004965 |
| H | -0.637445 | 12.195109 | 2.878812 | -0.018929 | 0.021613  | 0.010621  |
| H | 3.090587  | 1.606491  | 3.487978 | 0.018830  | -0.021755 | -0.010539 |
| H | 5.245016  | 5.294309  | 0.304583 | 0.018817  | 0.021748  | -0.010526 |
| H | -2.791874 | 8.507292  | 6.062207 | -0.018934 | -0.021626 | 0.010627  |

49 f = 26.968990 THz 169.451162 2PiTHz 899.588648 cm-1 111.534817 meV

|    | X         | Y         | Z        | dx        | dy        | dz        |
|----|-----------|-----------|----------|-----------|-----------|-----------|
| Li | 3.769818  | 9.645336  | 4.001386 | -0.007281 | 0.005090  | -0.003834 |
| Li | -1.316675 | 4.156264  | 2.365404 | 0.007299  | -0.005106 | 0.003842  |
| Li | -3.471104 | 2.744536  | 5.548798 | 0.007299  | 0.005107  | 0.003840  |
| Li | 5.924247  | 11.057064 | 0.817991 | -0.007281 | -0.005088 | -0.003837 |
| Na | 2.049025  | 6.784862  | 1.629696 | -0.000951 | -0.001422 | 0.000255  |
| Na | 0.404117  | 7.016739  | 4.737094 | 0.000952  | 0.001427  | -0.000261 |
| Na | 2.558546  | 13.685662 | 1.553699 | 0.000952  | -0.001427 | -0.000261 |
| Na | -0.105403 | 0.115939  | 4.813091 | -0.000951 | 0.001422  | 0.000256  |
| B  | 4.155007  | 8.978944  | 1.168663 | 0.084142  | 0.041650  | -0.044207 |
| B  | -1.701865 | 4.822656  | 5.198127 | -0.084399 | -0.041752 | 0.044310  |
| B  | 0.452564  | 2.078144  | 2.014732 | -0.084384 | 0.041768  | 0.044304  |
| B  | 2.000578  | 11.723457 | 4.352058 | 0.084169  | -0.041648 | -0.044205 |
| B  | -2.733891 | 11.746082 | 5.839177 | 0.008017  | 0.030127  | -0.008383 |
| B  | 5.187034  | 2.055518  | 0.527613 | -0.008078 | -0.030192 | 0.008451  |
| B  | 3.032605  | 4.845282  | 3.711007 | -0.008075 | 0.030164  | 0.008444  |
| B  | -0.579463 | 8.956318  | 2.655782 | 0.008009  | -0.030149 | -0.008384 |
| B  | -0.983708 | 0.054306  | 1.827988 | -0.005013 | -0.005297 | 0.001292  |
| B  | 3.436850  | 13.747295 | 4.538802 | 0.004993  | 0.005281  | -0.001299 |
| B  | 5.591279  | 6.955106  | 1.355407 | 0.004992  | -0.005281 | -0.001301 |
| B  | -3.138137 | 6.846495  | 5.011383 | -0.005012 | 0.005296  | 0.001292  |

|    |           |           |          |           |           |           |
|----|-----------|-----------|----------|-----------|-----------|-----------|
| Si | 0.631772  | 3.486686  | 4.508512 | -0.017331 | 0.005223  | 0.006700  |
| Si | 1.821370  | 10.314915 | 1.858278 | 0.017290  | -0.005191 | -0.006693 |
| Si | -0.333059 | 10.387486 | 5.041673 | 0.017293  | 0.005191  | -0.006698 |
| Si | 2.786201  | 3.414115  | 1.325117 | -0.017335 | -0.005225 | 0.006704  |
| O  | 0.061445  | 3.072947  | 3.041906 | 0.003276  | -0.018707 | -0.034540 |
| O  | 2.391697  | 10.728653 | 3.324884 | -0.003280 | 0.018674  | 0.034463  |
| O  | 4.546126  | 9.973747  | 0.141489 | -0.003274 | -0.018675 | 0.034468  |
| O  | -2.092984 | 3.827853  | 6.225301 | 0.003278  | 0.018704  | -0.034537 |
| O  | 2.197450  | 3.933608  | 4.519003 | 0.012110  | 0.006592  | 0.003013  |
| O  | 0.255692  | 9.867992  | 1.847787 | -0.012066 | -0.006558 | -0.003017 |
| O  | -1.898737 | 10.834409 | 5.031182 | -0.012077 | 0.006568  | -0.003012 |
| O  | 4.351879  | 2.967192  | 1.335608 | 0.012107  | -0.006587 | 0.003013  |
| O  | -0.212316 | 4.798696  | 5.055280 | 0.058253  | -0.022876 | -0.014445 |
| O  | 2.665458  | 9.002905  | 1.311510 | -0.058061 | 0.022805  | 0.014401  |
| O  | 0.511030  | 11.699496 | 4.494905 | -0.058077 | -0.022812 | 0.014401  |
| O  | 1.942113  | 2.102105  | 1.871885 | 0.058248  | 0.022878  | -0.014450 |
| O  | 0.525580  | 2.169271  | 5.472081 | 0.002409  | 0.011764  | 0.001104  |
| O  | 1.927562  | 11.632329 | 0.894709 | -0.002406 | -0.011752 | -0.001092 |
| O  | -0.226867 | 9.070071  | 4.078104 | -0.002402 | 0.011757  | -0.001085 |
| O  | 2.680009  | 4.731529  | 2.288686 | 0.002413  | -0.011762 | 0.001106  |
| O  | 0.058846  | 0.698526  | 2.444964 | -0.005335 | -0.017796 | -0.003276 |
| O  | 2.394296  | 13.103075 | 3.921826 | 0.005299  | 0.017723  | 0.003266  |
| O  | 4.548725  | 7.599326  | 0.738431 | 0.005297  | -0.017717 | 0.003267  |
| O  | -2.095583 | 6.202275  | 5.628359 | -0.005336 | 0.017797  | -0.003278 |
| O  | -2.459230 | 13.184059 | 5.445139 | -0.004164 | -0.004807 | -0.003085 |
| O  | 4.912372  | 0.617542  | 0.921651 | 0.004191  | 0.004804  | 0.003107  |
| O  | 2.757943  | 6.283259  | 4.105046 | 0.004195  | -0.004786 | 0.003119  |
| O  | -0.304801 | 7.518342  | 2.261744 | -0.004160 | 0.004820  | -0.003075 |
| O  | -0.175430 | 2.374756  | 0.744070 | 0.013021  | 0.005590  | -0.004646 |
| O  | 2.628573  | 11.426844 | 5.622720 | -0.012971 | -0.005573 | 0.004625  |
| O  | 4.783002  | 9.275557  | 2.439325 | -0.012967 | 0.005571  | 0.004618  |
| O  | -2.329859 | 4.526044  | 3.927465 | 0.013017  | -0.005593 | -0.004658 |
| O  | -1.223866 | 12.517207 | 2.155216 | 0.003232  | 0.013773  | -0.000779 |
| O  | 3.677009  | 1.284394  | 4.211574 | -0.003219 | -0.013729 | 0.000769  |
| O  | 5.831438  | 5.616407  | 1.028179 | -0.003217 | 0.013721  | 0.000766  |
| O  | -3.378295 | 8.185194  | 5.338611 | 0.003232  | -0.013783 | -0.000782 |

|   |           |           |          |           |           |           |
|---|-----------|-----------|----------|-----------|-----------|-----------|
| H | -0.637445 | 12.195109 | 2.878812 | 0.021644  | -0.002409 | -0.019662 |
| H | 3.090587  | 1.606491  | 3.487978 | -0.021695 | 0.002554  | 0.019735  |
| H | 5.245016  | 5.294309  | 0.304583 | -0.021697 | -0.002576 | 0.019740  |
| H | -2.791874 | 8.507292  | 6.062207 | 0.021644  | 0.002403  | -0.019668 |

50 f = 26.955709 THz 169.367714 2PiTHz 899.145636 cm-1 111.479891 meV

|    | X         | Y         | Z        | dx        | dy        | dz        |
|----|-----------|-----------|----------|-----------|-----------|-----------|
| Li | 3.769818  | 9.645336  | 4.001386 | 0.006036  | -0.006386 | 0.002054  |
| Li | -1.316675 | 4.156264  | 2.365404 | 0.006018  | -0.006374 | 0.002042  |
| Li | -3.471104 | 2.744536  | 5.548798 | 0.006017  | 0.006374  | 0.002044  |
| Li | 5.924247  | 11.057064 | 0.817991 | 0.006036  | 0.006388  | 0.002051  |
| Na | 2.049025  | 6.784862  | 1.629696 | 0.000535  | 0.001444  | -0.000589 |
| Na | 0.404117  | 7.016739  | 4.737094 | 0.000532  | 0.001438  | -0.000580 |
| Na | 2.558546  | 13.685662 | 1.553699 | 0.000533  | -0.001438 | -0.000581 |
| Na | -0.105403 | 0.115939  | 4.813091 | 0.000535  | -0.001444 | -0.000588 |
| B  | 4.155007  | 8.978944  | 1.168663 | -0.086308 | -0.037130 | 0.043523  |
| B  | -1.701865 | 4.822656  | 5.198127 | -0.086069 | -0.036962 | 0.043382  |
| B  | 0.452564  | 2.078144  | 2.014732 | -0.086064 | 0.037008  | 0.043384  |
| B  | 2.000578  | 11.723457 | 4.352058 | -0.086317 | 0.037097  | 0.043511  |
| B  | -2.733891 | 11.746082 | 5.839177 | -0.008711 | -0.015458 | 0.011441  |
| B  | 5.187034  | 2.055518  | 0.527613 | -0.008717 | -0.015379 | 0.011473  |
| B  | 3.032605  | 4.845282  | 3.711007 | -0.008715 | 0.015365  | 0.011448  |
| B  | -0.579463 | 8.956318  | 2.655782 | -0.008704 | 0.015465  | 0.011460  |
| B  | -0.983708 | 0.054306  | 1.827988 | -0.005462 | -0.004624 | -0.000559 |
| B  | 3.436850  | 13.747295 | 4.538802 | -0.005466 | -0.004632 | -0.000554 |
| B  | 5.591279  | 6.955106  | 1.355407 | -0.005465 | 0.004634  | -0.000551 |
| B  | -3.138137 | 6.846495  | 5.011383 | -0.005462 | 0.004622  | -0.000561 |
| Si | 0.631772  | 3.486686  | 4.508512 | -0.015298 | 0.008022  | 0.006782  |
| Si | 1.821370  | 10.314915 | 1.858278 | -0.015346 | 0.008002  | 0.006811  |
| Si | -0.333059 | 10.387486 | 5.041673 | -0.015355 | -0.008015 | 0.006815  |
| Si | 2.786201  | 3.414115  | 1.325117 | -0.015292 | -0.008009 | 0.006785  |
| O  | 0.061445  | 3.072947  | 3.041906 | 0.002021  | -0.016856 | -0.033672 |
| O  | 2.391697  | 10.728653 | 3.324884 | 0.002033  | -0.016912 | -0.033761 |
| O  | 4.546126  | 9.973747  | 0.141489 | 0.002032  | 0.016921  | -0.033780 |
| O  | -2.092984 | 3.827853  | 6.225301 | 0.002019  | 0.016845  | -0.033656 |

|   |           |           |          |           |           |           |
|---|-----------|-----------|----------|-----------|-----------|-----------|
| O | 2.197450  | 3.933608  | 4.519003 | 0.012083  | 0.008437  | 0.001090  |
| O | 0.255692  | 9.867992  | 1.847787 | 0.012120  | 0.008451  | 0.001105  |
| O | -1.898737 | 10.834409 | 5.031182 | 0.012131  | -0.008458 | 0.001105  |
| O | 4.351879  | 2.967192  | 1.335608 | 0.012075  | -0.008433 | 0.001084  |
| O | -0.212316 | 4.798696  | 5.055280 | 0.061017  | -0.024244 | -0.015455 |
| O | 2.665458  | 9.002905  | 1.311510 | 0.061159  | -0.024279 | -0.015486 |
| O | 0.511030  | 11.699496 | 4.494905 | 0.061175  | 0.024300  | -0.015494 |
| O | 1.942113  | 2.102105  | 1.871885 | 0.061006  | 0.024227  | -0.015450 |
| O | 0.525580  | 2.169271  | 5.472081 | 0.001569  | 0.007424  | 0.003090  |
| O | 1.927562  | 11.632329 | 0.894709 | 0.001575  | 0.007483  | 0.003073  |
| O | -0.226867 | 9.070071  | 4.078104 | 0.001573  | -0.007473 | 0.003076  |
| O | 2.680009  | 4.731529  | 2.288686 | 0.001572  | -0.007436 | 0.003082  |
| O | 0.058846  | 0.698526  | 2.444964 | -0.007114 | -0.017909 | -0.005032 |
| O | 2.394296  | 13.103075 | 3.921826 | -0.007106 | -0.017926 | -0.005038 |
| O | 4.548725  | 7.599326  | 0.738431 | -0.007117 | 0.017944  | -0.005041 |
| O | -2.095583 | 6.202275  | 5.628359 | -0.007104 | 0.017887  | -0.005033 |
| O | -2.459230 | 13.184059 | 5.445139 | 0.007638  | -0.003070 | 0.009443  |
| O | 4.912372  | 0.617542  | 0.921651 | 0.007647  | -0.003087 | 0.009439  |
| O | 2.757943  | 6.283259  | 4.105046 | 0.007642  | 0.003091  | 0.009440  |
| O | -0.304801 | 7.518342  | 2.261744 | 0.007647  | 0.003072  | 0.009446  |
| O | -0.175430 | 2.374756  | 0.744070 | 0.011449  | 0.004543  | -0.006209 |
| O | 2.628573  | 11.426844 | 5.622720 | 0.011483  | 0.004557  | -0.006208 |
| O | 4.783002  | 9.275557  | 2.439325 | 0.011477  | -0.004556 | -0.006211 |
| O | -2.329859 | 4.526044  | 3.927465 | 0.011445  | -0.004543 | -0.006209 |
| O | -1.223866 | 12.517207 | 2.155216 | 0.003887  | 0.012761  | -0.003661 |
| O | 3.677009  | 1.284394  | 4.211574 | 0.003889  | 0.012782  | -0.003656 |
| O | 5.831438  | 5.616407  | 1.028179 | 0.003891  | -0.012788 | -0.003658 |
| O | -3.378295 | 8.185194  | 5.338611 | 0.003881  | -0.012758 | -0.003660 |
| H | -0.637445 | 12.195109 | 2.878812 | -0.021749 | 0.046328  | 0.028242  |
| H | 3.090587  | 1.606491  | 3.487978 | -0.021640 | 0.046253  | 0.028128  |
| H | 5.245016  | 5.294309  | 0.304583 | -0.021668 | -0.046283 | 0.028163  |
| H | -2.791874 | 8.507292  | 6.062207 | -0.021710 | -0.046290 | 0.028190  |

51 f = 26.555702 THz 166.854396 2PiTHz 885.802843 cm-1 109.825595 meV

X Y Z dx dy dz

|    |           |           |          |           |           |           |
|----|-----------|-----------|----------|-----------|-----------|-----------|
| Li | 3.769818  | 9.645336  | 4.001386 | -0.009618 | -0.001957 | -0.009554 |
| Li | -1.316675 | 4.156264  | 2.365404 | 0.009612  | 0.001959  | 0.009553  |
| Li | -3.471104 | 2.744536  | 5.548798 | 0.009606  | -0.001958 | 0.009548  |
| Li | 5.924247  | 11.057064 | 0.817991 | -0.009623 | 0.001958  | -0.009560 |
| Na | 2.049025  | 6.784862  | 1.629696 | -0.001606 | 0.001936  | 0.001582  |
| Na | 0.404117  | 7.016739  | 4.737094 | 0.001604  | -0.001937 | -0.001582 |
| Na | 2.558546  | 13.685662 | 1.553699 | 0.001606  | 0.001938  | -0.001581 |
| Na | -0.105403 | 0.115939  | 4.813091 | -0.001605 | -0.001936 | 0.001583  |
| B  | 4.155007  | 8.978944  | 1.168663 | -0.051203 | 0.057050  | 0.035677  |
| B  | -1.701865 | 4.822656  | 5.198127 | 0.051140  | -0.056894 | -0.035649 |
| B  | 0.452564  | 2.078144  | 2.014732 | 0.051203  | 0.056986  | -0.035668 |
| B  | 2.000578  | 11.723457 | 4.352058 | -0.051161 | -0.057000 | 0.035655  |
| B  | -2.733891 | 11.746082 | 5.839177 | 0.020232  | 0.075155  | -0.030642 |
| B  | 5.187034  | 2.055518  | 0.527613 | -0.020221 | -0.075179 | 0.030656  |
| B  | 3.032605  | 4.845282  | 3.711007 | -0.020229 | 0.075068  | 0.030638  |
| B  | -0.579463 | 8.956318  | 2.655782 | 0.020227  | -0.075239 | -0.030656 |
| B  | -0.983708 | 0.054306  | 1.827988 | -0.000632 | -0.002114 | -0.000856 |
| B  | 3.436850  | 13.747295 | 4.538802 | 0.000635  | 0.002110  | 0.000857  |
| B  | 5.591279  | 6.955106  | 1.355407 | 0.000635  | -0.002114 | 0.000860  |
| B  | -3.138137 | 6.846495  | 5.011383 | -0.000630 | 0.002111  | -0.000851 |
| Si | 0.631772  | 3.486686  | 4.508512 | -0.007722 | 0.019384  | -0.004473 |
| Si | 1.821370  | 10.314915 | 1.858278 | 0.007737  | -0.019386 | 0.004482  |
| Si | -0.333059 | 10.387486 | 5.041673 | 0.007730  | 0.019390  | 0.004486  |
| Si | 2.786201  | 3.414115  | 1.325117 | -0.007727 | -0.019381 | -0.004467 |
| O  | 0.061445  | 3.072947  | 3.041906 | -0.001858 | -0.006775 | -0.000582 |
| O  | 2.391697  | 10.728653 | 3.324884 | 0.001844  | 0.006781  | 0.000586  |
| O  | 4.546126  | 9.973747  | 0.141489 | 0.001850  | -0.006783 | 0.000585  |
| O  | -2.092984 | 3.827853  | 6.225301 | -0.001851 | 0.006766  | -0.000579 |
| O  | 2.197450  | 3.933608  | 4.519003 | -0.005287 | -0.014622 | 0.002724  |
| O  | 0.255692  | 9.867992  | 1.847787 | 0.005302  | 0.014646  | -0.002734 |
| O  | -1.898737 | 10.834409 | 5.031182 | 0.005298  | -0.014631 | -0.002728 |
| O  | 4.351879  | 2.967192  | 1.335608 | -0.005298 | 0.014644  | 0.002732  |
| O  | -0.212316 | 4.798696  | 5.055280 | -0.009919 | -0.007614 | 0.002030  |
| O  | 2.665458  | 9.002905  | 1.311510 | 0.009950  | 0.007594  | -0.002039 |
| O  | 0.511030  | 11.699496 | 4.494905 | 0.009931  | -0.007608 | -0.002036 |
| O  | 1.942113  | 2.102105  | 1.871885 | -0.009946 | 0.007595  | 0.002034  |

|   |           |           |          |           |           |           |
|---|-----------|-----------|----------|-----------|-----------|-----------|
| O | 0.525580  | 2.169271  | 5.472081 | 0.001282  | -0.006350 | -0.002412 |
| O | 1.927562  | 11.632329 | 0.894709 | -0.001300 | 0.006354  | 0.002385  |
| O | -0.226867 | 9.070071  | 4.078104 | -0.001293 | -0.006349 | 0.002391  |
| O | 2.680009  | 4.731529  | 2.288686 | 0.001292  | 0.006357  | -0.002404 |
| O | 0.058846  | 0.698526  | 2.444964 | -0.015218 | -0.032668 | 0.008461  |
| O | 2.394296  | 13.103075 | 3.921826 | 0.015211  | 0.032658  | -0.008456 |
| O | 4.548725  | 7.599326  | 0.738431 | 0.015220  | -0.032689 | -0.008467 |
| O | -2.095583 | 6.202275  | 5.628359 | -0.015205 | 0.032621  | 0.008446  |
| O | -2.459230 | 13.184059 | 5.445139 | 0.003092  | -0.038907 | 0.019699  |
| O | 4.912372  | 0.617542  | 0.921651 | -0.003095 | 0.038912  | -0.019703 |
| O | 2.757943  | 6.283259  | 4.105046 | -0.003084 | -0.038862 | -0.019676 |
| O | -0.304801 | 7.518342  | 2.261744 | 0.003100  | 0.038942  | 0.019714  |
| O | -0.175430 | 2.374756  | 0.744070 | 0.013538  | 0.003707  | 0.009826  |
| O | 2.628573  | 11.426844 | 5.622720 | -0.013537 | -0.003694 | -0.009831 |
| O | 4.783002  | 9.275557  | 2.439325 | -0.013553 | 0.003706  | -0.009832 |
| O | -2.329859 | 4.526044  | 3.927465 | 0.013524  | -0.003696 | 0.009824  |
| O | -1.223866 | 12.517207 | 2.155216 | 0.014172  | -0.005476 | 0.007149  |
| O | 3.677009  | 1.284394  | 4.211574 | -0.014164 | 0.005481  | -0.007149 |
| O | 5.831438  | 5.616407  | 1.028179 | -0.014170 | -0.005485 | -0.007155 |
| O | -3.378295 | 8.185194  | 5.338611 | 0.014160  | 0.005465  | 0.007141  |
| H | -0.637445 | 12.195109 | 2.878812 | -0.059701 | 0.045579  | 0.085768  |
| H | 3.090587  | 1.606491  | 3.487978 | 0.059635  | -0.045573 | -0.085704 |
| H | 5.245016  | 5.294309  | 0.304583 | 0.059645  | 0.045608  | -0.085745 |
| H | -2.791874 | 8.507292  | 6.062207 | -0.059683 | -0.045507 | 0.085694  |

52 f = 26.341569 THz 165.508959 2PiTHz 878.660133 cm-1 108.940011 meV

|    | X         | Y         | Z        | dx        | dy        | dz        |
|----|-----------|-----------|----------|-----------|-----------|-----------|
| Li | 3.769818  | 9.645336  | 4.001386 | -0.004720 | -0.001552 | -0.008060 |
| Li | -1.316675 | 4.156264  | 2.365404 | -0.004707 | -0.001553 | -0.008050 |
| Li | -3.471104 | 2.744536  | 5.548798 | 0.004719  | -0.001554 | 0.008060  |
| Li | 5.924247  | 11.057064 | 0.817991 | 0.004706  | -0.001549 | 0.008049  |
| Na | 2.049025  | 6.784862  | 1.629696 | 0.001665  | 0.000280  | 0.000987  |
| Na | 0.404117  | 7.016739  | 4.737094 | 0.001669  | 0.000279  | 0.000986  |
| Na | 2.558546  | 13.685662 | 1.553699 | -0.001667 | 0.000280  | -0.000988 |
| Na | -0.105403 | 0.115939  | 4.813091 | -0.001668 | 0.000278  | -0.000986 |

|    |           |           |          |           |           |           |
|----|-----------|-----------|----------|-----------|-----------|-----------|
| B  | 4.155007  | 8.978944  | 1.168663 | 0.038218  | -0.075623 | -0.012548 |
| B  | -1.701865 | 4.822656  | 5.198127 | 0.038236  | -0.075685 | -0.012566 |
| B  | 0.452564  | 2.078144  | 2.014732 | -0.038221 | -0.075625 | 0.012548  |
| B  | 2.000578  | 11.723457 | 4.352058 | -0.038272 | -0.075707 | 0.012586  |
| B  | -2.733891 | 11.746082 | 5.839177 | 0.002883  | 0.088657  | -0.016668 |
| B  | 5.187034  | 2.055518  | 0.527613 | 0.002871  | 0.088530  | -0.016610 |
| B  | 3.032605  | 4.845282  | 3.711007 | -0.002884 | 0.088607  | 0.016639  |
| B  | -0.579463 | 8.956318  | 2.655782 | -0.002862 | 0.088546  | 0.016630  |
| B  | -0.983708 | 0.054306  | 1.827988 | -0.000322 | 0.002020  | 0.001491  |
| B  | 3.436850  | 13.747295 | 4.538802 | -0.000315 | 0.002018  | 0.001492  |
| B  | 5.591279  | 6.955106  | 1.355407 | 0.000317  | 0.002016  | -0.001491 |
| B  | -3.138137 | 6.846495  | 5.011383 | 0.000325  | 0.002023  | -0.001488 |
| Si | 0.631772  | 3.486686  | 4.508512 | -0.005952 | 0.001148  | 0.009775  |
| Si | 1.821370  | 10.314915 | 1.858278 | -0.005939 | 0.001115  | 0.009782  |
| Si | -0.333059 | 10.387486 | 5.041673 | 0.005956  | 0.001143  | -0.009780 |
| Si | 2.786201  | 3.414115  | 1.325117 | 0.005937  | 0.001133  | -0.009775 |
| O  | 0.061445  | 3.072947  | 3.041906 | 0.002928  | 0.007610  | -0.002373 |
| O  | 2.391697  | 10.728653 | 3.324884 | 0.002936  | 0.007623  | -0.002353 |
| O  | 4.546126  | 9.973747  | 0.141489 | -0.002935 | 0.007607  | 0.002363  |
| O  | -2.092984 | 3.827853  | 6.225301 | -0.002927 | 0.007626  | 0.002358  |
| O  | 2.197450  | 3.933608  | 4.519003 | -0.004640 | -0.013007 | 0.002163  |
| O  | 0.255692  | 9.867992  | 1.847787 | -0.004642 | -0.013006 | 0.002157  |
| O  | -1.898737 | 10.834409 | 5.031182 | 0.004646  | -0.013025 | -0.002166 |
| O  | 4.351879  | 2.967192  | 1.335608 | 0.004645  | -0.012999 | -0.002161 |
| O  | -0.212316 | 4.798696  | 5.055280 | -0.012650 | 0.010393  | -0.002238 |
| O  | 2.665458  | 9.002905  | 1.311510 | -0.012661 | 0.010412  | -0.002235 |
| O  | 0.511030  | 11.699496 | 4.494905 | 0.012661  | 0.010396  | 0.002236  |
| O  | 1.942113  | 2.102105  | 1.871885 | 0.012655  | 0.010403  | 0.002237  |
| O  | 0.525580  | 2.169271  | 5.472081 | 0.007370  | -0.009331 | 0.007515  |
| O  | 1.927562  | 11.632329 | 0.894709 | 0.007376  | -0.009312 | 0.007515  |
| O  | -0.226867 | 9.070071  | 4.078104 | -0.007376 | -0.009320 | -0.007510 |
| O  | 2.680009  | 4.731529  | 2.288686 | -0.007370 | -0.009331 | -0.007519 |
| O  | 0.058846  | 0.698526  | 2.444964 | 0.008285  | 0.029283  | -0.008644 |
| O  | 2.394296  | 13.103075 | 3.921826 | 0.008316  | 0.029326  | -0.008643 |
| O  | 4.548725  | 7.599326  | 0.738431 | -0.008293 | 0.029284  | 0.008633  |
| O  | -2.095583 | 6.202275  | 5.628359 | -0.008297 | 0.029310  | 0.008648  |



|   |           |           |          |           |           |           |
|---|-----------|-----------|----------|-----------|-----------|-----------|
| O | -2.459230 | 13.184059 | 5.445139 | 0.008711  | -0.043225 | 0.021271  |
| O | 4.912372  | 0.617542  | 0.921651 | 0.008713  | -0.043182 | 0.021247  |
| O | 2.757943  | 6.283259  | 4.105046 | -0.008718 | -0.043218 | -0.021262 |
| O | -0.304801 | 7.518342  | 2.261744 | -0.008708 | -0.043174 | -0.021245 |
| O | -0.175430 | 2.374756  | 0.744070 | -0.012917 | -0.001737 | -0.009958 |
| O | 2.628573  | 11.426844 | 5.622720 | -0.012944 | -0.001743 | -0.009978 |
| O | 4.783002  | 9.275557  | 2.439325 | 0.012926  | -0.001739 | 0.009963  |
| O | -2.329859 | 4.526044  | 3.927465 | 0.012933  | -0.001741 | 0.009968  |
| O | -1.223866 | 12.517207 | 2.155216 | -0.008376 | 0.010495  | -0.008091 |
| O | 3.677009  | 1.284394  | 4.211574 | -0.008393 | 0.010492  | -0.008098 |
| O | 5.831438  | 5.616407  | 1.028179 | 0.008376  | 0.010486  | 0.008089  |
| O | -3.378295 | 8.185194  | 5.338611 | 0.008389  | 0.010499  | 0.008098  |
| H | -0.637445 | 12.195109 | 2.878812 | 0.010321  | -0.036976 | -0.047931 |
| H | 3.090587  | 1.606491  | 3.487978 | 0.010378  | -0.037053 | -0.048029 |
| H | 5.245016  | 5.294309  | 0.304583 | -0.010333 | -0.036992 | 0.047941  |
| H | -2.791874 | 8.507292  | 6.062207 | -0.010379 | -0.036995 | 0.048001  |

53 f = 26.223260 THz 164.765601 2PiTHz 874.713765 cm-1 108.450724 meV

|    | X         | Y         | Z        | dx        | dy        | dz        |
|----|-----------|-----------|----------|-----------|-----------|-----------|
| Li | 3.769818  | 9.645336  | 4.001386 | 0.002542  | -0.001123 | 0.000054  |
| Li | -1.316675 | 4.156264  | 2.365404 | -0.002564 | 0.001116  | -0.000065 |
| Li | -3.471104 | 2.744536  | 5.548798 | 0.002549  | 0.001120  | 0.000058  |
| Li | 5.924247  | 11.057064 | 0.817991 | -0.002563 | -0.001118 | -0.000066 |
| Na | 2.049025  | 6.784862  | 1.629696 | -0.001539 | 0.001210  | 0.001384  |
| Na | 0.404117  | 7.016739  | 4.737094 | 0.001537  | -0.001211 | -0.001384 |
| Na | 2.558546  | 13.685662 | 1.553699 | -0.001541 | -0.001212 | 0.001381  |
| Na | -0.105403 | 0.115939  | 4.813091 | 0.001534  | 0.001209  | -0.001387 |
| B  | 4.155007  | 8.978944  | 1.168663 | -0.033957 | 0.086530  | 0.009754  |
| B  | -1.701865 | 4.822656  | 5.198127 | 0.033779  | -0.086391 | -0.009640 |
| B  | 0.452564  | 2.078144  | 2.014732 | -0.033953 | -0.086536 | 0.009757  |
| B  | 2.000578  | 11.723457 | 4.352058 | 0.033774  | 0.086355  | -0.009626 |
| B  | -2.733891 | 11.746082 | 5.839177 | -0.005169 | -0.082248 | 0.016860  |
| B  | 5.187034  | 2.055518  | 0.527613 | 0.005249  | 0.082506  | -0.016932 |
| B  | 3.032605  | 4.845282  | 3.711007 | -0.005206 | 0.082291  | 0.016862  |
| B  | -0.579463 | 8.956318  | 2.655782 | 0.005218  | -0.082504 | -0.016942 |

|    |           |           |          |           |           |           |
|----|-----------|-----------|----------|-----------|-----------|-----------|
| B  | -0.983708 | 0.054306  | 1.827988 | 0.000687  | -0.000505 | 0.001646  |
| B  | 3.436850  | 13.747295 | 4.538802 | -0.000680 | 0.000510  | -0.001631 |
| B  | 5.591279  | 6.955106  | 1.355407 | 0.000687  | 0.000502  | 0.001643  |
| B  | -3.138137 | 6.846495  | 5.011383 | -0.000676 | -0.000513 | -0.001633 |
| Si | 0.631772  | 3.486686  | 4.508512 | -0.007690 | 0.001713  | 0.010627  |
| Si | 1.821370  | 10.314915 | 1.858278 | 0.007716  | -0.001769 | -0.010617 |
| Si | -0.333059 | 10.387486 | 5.041673 | -0.007679 | -0.001706 | 0.010624  |
| Si | 2.786201  | 3.414115  | 1.325117 | 0.007718  | 0.001772  | -0.010619 |
| O  | 0.061445  | 3.072947  | 3.041906 | 0.002168  | 0.011652  | 0.004512  |
| O  | 2.391697  | 10.728653 | 3.324884 | -0.002141 | -0.011647 | -0.004521 |
| O  | 4.546126  | 9.973747  | 0.141489 | 0.002156  | -0.011659 | 0.004517  |
| O  | -2.092984 | 3.827853  | 6.225301 | -0.002153 | 0.011646  | -0.004523 |
| O  | 2.197450  | 3.933608  | 4.519003 | -0.002684 | -0.009505 | 0.000233  |
| O  | 0.255692  | 9.867992  | 1.847787 | 0.002695  | 0.009552  | -0.000251 |
| O  | -1.898737 | 10.834409 | 5.031182 | -0.002688 | 0.009510  | 0.000235  |
| O  | 4.351879  | 2.967192  | 1.335608 | 0.002695  | -0.009547 | -0.000250 |
| O  | -0.212316 | 4.798696  | 5.055280 | -0.007880 | 0.004255  | -0.003648 |
| O  | 2.665458  | 9.002905  | 1.311510 | 0.007910  | -0.004220 | 0.003647  |
| O  | 0.511030  | 11.699496 | 4.494905 | -0.007897 | -0.004253 | -0.003644 |
| O  | 1.942113  | 2.102105  | 1.871885 | 0.007891  | 0.004225  | 0.003651  |
| O  | 0.525580  | 2.169271  | 5.472081 | 0.004573  | -0.005472 | 0.000893  |
| O  | 1.927562  | 11.632329 | 0.894709 | -0.004571 | 0.005484  | -0.000881 |
| O  | -0.226867 | 9.070071  | 4.078104 | 0.004569  | 0.005468  | 0.000890  |
| O  | 2.680009  | 4.731529  | 2.288686 | -0.004574 | -0.005491 | -0.000883 |
| O  | 0.058846  | 0.698526  | 2.444964 | 0.008002  | 0.032367  | -0.009726 |
| O  | 2.394296  | 13.103075 | 3.921826 | -0.007956 | -0.032266 | 0.009676  |
| O  | 4.548725  | 7.599326  | 0.738431 | 0.008005  | -0.032361 | -0.009716 |
| O  | -2.095583 | 6.202275  | 5.628359 | -0.007955 | 0.032284  | 0.009691  |
| O  | -2.459230 | 13.184059 | 5.445139 | -0.005733 | 0.041666  | -0.019596 |
| O  | 4.912372  | 0.617542  | 0.921651 | 0.005741  | -0.041787 | 0.019651  |
| O  | 2.757943  | 6.283259  | 4.105046 | -0.005747 | -0.041687 | -0.019608 |
| O  | -0.304801 | 7.518342  | 2.261744 | 0.005732  | 0.041788  | 0.019645  |
| O  | -0.175430 | 2.374756  | 0.744070 | -0.010377 | -0.000852 | -0.007936 |
| O  | 2.628573  | 11.426844 | 5.622720 | 0.010333  | 0.000832  | 0.007907  |
| O  | 4.783002  | 9.275557  | 2.439325 | -0.010366 | 0.000847  | -0.007937 |
| O  | -2.329859 | 4.526044  | 3.927465 | 0.010352  | -0.000841 | 0.007911  |

|   |           |           |          |           |           |           |
|---|-----------|-----------|----------|-----------|-----------|-----------|
| O | -1.223866 | 12.517207 | 2.155216 | -0.006308 | 0.013738  | -0.007200 |
| O | 3.677009  | 1.284394  | 4.211574 | 0.006303  | -0.013711 | 0.007186  |
| O | 5.831438  | 5.616407  | 1.028179 | -0.006305 | -0.013737 | -0.007202 |
| O | -3.378295 | 8.185194  | 5.338611 | 0.006310  | 0.013716  | 0.007188  |
| H | -0.637445 | 12.195109 | 2.878812 | 0.001174  | -0.064405 | -0.047643 |
| H | 3.090587  | 1.606491  | 3.487978 | -0.001305 | 0.064220  | 0.047615  |
| H | 5.245016  | 5.294309  | 0.304583 | 0.001155  | 0.064425  | -0.047636 |
| H | -2.791874 | 8.507292  | 6.062207 | -0.001346 | -0.064209 | 0.047653  |

54 f = 26.066333 THz 163.779599 2PiTHz 869.479242 cm-1 107.801726 meV

|    | X         | Y         | Z        | dx        | dy        | dz        |
|----|-----------|-----------|----------|-----------|-----------|-----------|
| Li | 3.769818  | 9.645336  | 4.001386 | 0.007200  | 0.001175  | 0.003446  |
| Li | -1.316675 | 4.156264  | 2.365404 | 0.007199  | 0.001183  | 0.003450  |
| Li | -3.471104 | 2.744536  | 5.548798 | 0.007207  | -0.001179 | 0.003453  |
| Li | 5.924247  | 11.057064 | 0.817991 | 0.007194  | -0.001181 | 0.003447  |
| Na | 2.049025  | 6.784862  | 1.629696 | 0.001517  | 0.000282  | 0.000991  |
| Na | 0.404117  | 7.016739  | 4.737094 | 0.001525  | 0.000275  | 0.000988  |
| Na | 2.558546  | 13.685662 | 1.553699 | 0.001520  | -0.000279 | 0.000991  |
| Na | -0.105403 | 0.115939  | 4.813091 | 0.001521  | -0.000278 | 0.000988  |
| B  | 4.155007  | 8.978944  | 1.168663 | 0.050778  | -0.061471 | -0.032875 |
| B  | -1.701865 | 4.822656  | 5.198127 | 0.050939  | -0.061714 | -0.032955 |
| B  | 0.452564  | 2.078144  | 2.014732 | 0.050836  | 0.061467  | -0.032918 |
| B  | 2.000578  | 11.723457 | 4.352058 | 0.050867  | 0.061692  | -0.032899 |
| B  | -2.733891 | 11.746082 | 5.839177 | -0.014802 | -0.085730 | 0.023146  |
| B  | 5.187034  | 2.055518  | 0.527613 | -0.014827 | -0.085505 | 0.023120  |
| B  | 3.032605  | 4.845282  | 3.711007 | -0.014831 | 0.085803  | 0.023189  |
| B  | -0.579463 | 8.956318  | 2.655782 | -0.014801 | 0.085484  | 0.023084  |
| B  | -0.983708 | 0.054306  | 1.827988 | -0.003160 | -0.000792 | -0.003151 |
| B  | 3.436850  | 13.747295 | 4.538802 | -0.003160 | -0.000788 | -0.003154 |
| B  | 5.591279  | 6.955106  | 1.355407 | -0.003159 | 0.000790  | -0.003152 |
| B  | -3.138137 | 6.846495  | 5.011383 | -0.003159 | 0.000790  | -0.003152 |
| Si | 0.631772  | 3.486686  | 4.508512 | -0.013368 | 0.019208  | -0.002399 |
| Si | 1.821370  | 10.314915 | 1.858278 | -0.013345 | 0.019189  | -0.002440 |
| Si | -0.333059 | 10.387486 | 5.041673 | -0.013360 | -0.019176 | -0.002408 |
| Si | 2.786201  | 3.414115  | 1.325117 | -0.013345 | -0.019220 | -0.002436 |

|   |           |           |          |           |           |           |
|---|-----------|-----------|----------|-----------|-----------|-----------|
| O | 0.061445  | 3.072947  | 3.041906 | -0.002344 | -0.007871 | -0.001887 |
| O | 2.391697  | 10.728653 | 3.324884 | -0.002339 | -0.007903 | -0.001904 |
| O | 4.546126  | 9.973747  | 0.141489 | -0.002335 | 0.007871  | -0.001885 |
| O | -2.092984 | 3.827853  | 6.225301 | -0.002350 | 0.007906  | -0.001904 |
| O | 2.197450  | 3.933608  | 4.519003 | -0.001171 | -0.013228 | 0.005208  |
| O | 0.255692  | 9.867992  | 1.847787 | -0.001158 | -0.013180 | 0.005206  |
| O | -1.898737 | 10.834409 | 5.031182 | -0.001169 | 0.013215  | 0.005207  |
| O | 4.351879  | 2.967192  | 1.335608 | -0.001162 | 0.013191  | 0.005207  |
| O | -0.212316 | 4.798696  | 5.055280 | -0.001493 | -0.010982 | -0.001071 |
| O | 2.665458  | 9.002905  | 1.311510 | -0.001452 | -0.010987 | -0.001061 |
| O | 0.511030  | 11.699496 | 4.494905 | -0.001491 | 0.010962  | -0.001065 |
| O | 1.942113  | 2.102105  | 1.871885 | -0.001450 | 0.011008  | -0.001064 |
| O | 0.525580  | 2.169271  | 5.472081 | 0.000804  | -0.002774 | -0.002025 |
| O | 1.927562  | 11.632329 | 0.894709 | 0.000786  | -0.002760 | -0.002011 |
| O | -0.226867 | 9.070071  | 4.078104 | 0.000802  | 0.002762  | -0.002019 |
| O | 2.680009  | 4.731529  | 2.288686 | 0.000785  | 0.002767  | -0.002019 |
| O | 0.058846  | 0.698526  | 2.444964 | -0.013918 | -0.028449 | 0.010819  |
| O | 2.394296  | 13.103075 | 3.921826 | -0.013935 | -0.028518 | 0.010828  |
| O | 4.548725  | 7.599326  | 0.738431 | -0.013905 | 0.028436  | 0.010816  |
| O | -2.095583 | 6.202275  | 5.628359 | -0.013951 | 0.028541  | 0.010835  |
| O | -2.459230 | 13.184059 | 5.445139 | -0.000082 | 0.038077  | -0.016494 |
| O | 4.912372  | 0.617542  | 0.921651 | -0.000075 | 0.037982  | -0.016456 |
| O | 2.757943  | 6.283259  | 4.105046 | -0.000083 | -0.038116 | -0.016510 |
| O | -0.304801 | 7.518342  | 2.261744 | -0.000077 | -0.037970 | -0.016446 |
| O | -0.175430 | 2.374756  | 0.744070 | 0.010229  | 0.003403  | 0.010749  |
| O | 2.628573  | 11.426844 | 5.622720 | 0.010255  | 0.003405  | 0.010761  |
| O | 4.783002  | 9.275557  | 2.439325 | 0.010225  | -0.003402 | 0.010737  |
| O | -2.329859 | 4.526044  | 3.927465 | 0.010268  | -0.003407 | 0.010780  |
| O | -1.223866 | 12.517207 | 2.155216 | 0.000394  | -0.009481 | 0.004466  |
| O | 3.677009  | 1.284394  | 4.211574 | 0.000400  | -0.009505 | 0.004484  |
| O | 5.831438  | 5.616407  | 1.028179 | 0.000380  | 0.009482  | 0.004465  |
| O | -3.378295 | 8.185194  | 5.338611 | 0.000418  | 0.009509  | 0.004488  |
| H | -0.637445 | 12.195109 | 2.878812 | 0.054211  | 0.071692  | 0.003908  |
| H | 3.090587  | 1.606491  | 3.487978 | 0.054300  | 0.071858  | 0.003951  |
| H | 5.245016  | 5.294309  | 0.304583 | 0.054292  | -0.071672 | 0.003829  |
| H | -2.791874 | 8.507292  | 6.062207 | 0.054216  | -0.071895 | 0.004050  |

55 f = 24.907514 THz 156.498526 2PiTHz 830.825211 cm-1 103.009235  
meV

|    | X         | Y         | Z        | dx        | dy        | dz        |
|----|-----------|-----------|----------|-----------|-----------|-----------|
| Li | 3.769818  | 9.645336  | 4.001386 | 0.001433  | 0.000103  | -0.001936 |
| Li | -1.316675 | 4.156264  | 2.365404 | -0.001436 | -0.000096 | 0.001928  |
| Li | -3.471104 | 2.744536  | 5.548798 | 0.001435  | -0.000103 | -0.001941 |
| Li | 5.924247  | 11.057064 | 0.817991 | -0.001436 | 0.000095  | 0.001921  |
| Na | 2.049025  | 6.784862  | 1.629696 | -0.000174 | -0.000294 | -0.000356 |
| Na | 0.404117  | 7.016739  | 4.737094 | 0.000176  | 0.000293  | 0.000359  |
| Na | 2.558546  | 13.685662 | 1.553699 | -0.000177 | 0.000291  | -0.000358 |
| Na | -0.105403 | 0.115939  | 4.813091 | 0.000173  | -0.000296 | 0.000357  |
| B  | 4.155007  | 8.978944  | 1.168663 | -0.015270 | 0.051364  | -0.009658 |
| B  | -1.701865 | 4.822656  | 5.198127 | 0.015271  | -0.051433 | 0.009675  |
| B  | 0.452564  | 2.078144  | 2.014732 | -0.015262 | -0.051418 | -0.009688 |
| B  | 2.000578  | 11.723457 | 4.352058 | 0.015285  | 0.051386  | 0.009644  |
| B  | -2.733891 | 11.746082 | 5.839177 | -0.012116 | 0.070156  | -0.024297 |
| B  | 5.187034  | 2.055518  | 0.527613 | 0.012138  | -0.070298 | 0.024303  |
| B  | 3.032605  | 4.845282  | 3.711007 | -0.012124 | -0.070242 | -0.024300 |
| B  | -0.579463 | 8.956318  | 2.655782 | 0.012129  | 0.070201  | 0.024297  |
| B  | -0.983708 | 0.054306  | 1.827988 | -0.003242 | -0.005762 | 0.003070  |
| B  | 3.436850  | 13.747295 | 4.538802 | 0.003235  | 0.005760  | -0.003073 |
| B  | 5.591279  | 6.955106  | 1.355407 | -0.003243 | 0.005750  | 0.003072  |
| B  | -3.138137 | 6.846495  | 5.011383 | 0.003234  | -0.005772 | -0.003067 |
| Si | 0.631772  | 3.486686  | 4.508512 | 0.002706  | 0.033723  | -0.000102 |
| Si | 1.821370  | 10.314915 | 1.858278 | -0.002702 | -0.033694 | 0.000107  |
| Si | -0.333059 | 10.387486 | 5.041673 | 0.002706  | -0.033685 | -0.000114 |
| Si | 2.786201  | 3.414115  | 1.325117 | -0.002705 | 0.033729  | 0.000093  |
| O  | 0.061445  | 3.072947  | 3.041906 | -0.005822 | 0.010101  | -0.006274 |
| O  | 2.391697  | 10.728653 | 3.324884 | 0.005809  | -0.010091 | 0.006276  |
| O  | 4.546126  | 9.973747  | 0.141489 | -0.005808 | -0.010085 | -0.006274 |
| O  | -2.092984 | 3.827853  | 6.225301 | 0.005825  | 0.010107  | 0.006274  |
| O  | 2.197450  | 3.933608  | 4.519003 | -0.002560 | 0.014038  | -0.003187 |
| O  | 0.255692  | 9.867992  | 1.847787 | 0.002546  | -0.014029 | 0.003185  |
| O  | -1.898737 | 10.834409 | 5.031182 | -0.002551 | -0.014024 | -0.003179 |
| O  | 4.351879  | 2.967192  | 1.335608 | 0.002559  | 0.014046  | 0.003193  |

|   |           |           |          |           |           |           |
|---|-----------|-----------|----------|-----------|-----------|-----------|
| O | -0.212316 | 4.798696  | 5.055280 | 0.013780  | -0.011741 | -0.006969 |
| O | 2.665458  | 9.002905  | 1.311510 | -0.013758 | 0.011731  | 0.006967  |
| O | 0.511030  | 11.699496 | 4.494905 | 0.013745  | 0.011714  | -0.006960 |
| O | 1.942113  | 2.102105  | 1.871885 | -0.013794 | -0.011756 | 0.006977  |
| O | 0.525580  | 2.169271  | 5.472081 | -0.004755 | -0.016540 | 0.013153  |
| O | 1.927562  | 11.632329 | 0.894709 | 0.004747  | 0.016545  | -0.013152 |
| O | -0.226867 | 9.070071  | 4.078104 | -0.004751 | 0.016545  | 0.013151  |
| O | 2.680009  | 4.731529  | 2.288686 | 0.004749  | -0.016537 | -0.013150 |
| O | 0.058846  | 0.698526  | 2.444964 | -0.032736 | -0.020527 | -0.019563 |
| O | 2.394296  | 13.103075 | 3.921826 | 0.032700  | 0.020495  | 0.019540  |
| O | 4.548725  | 7.599326  | 0.738431 | -0.032709 | 0.020486  | -0.019557 |
| O | -2.095583 | 6.202275  | 5.628359 | 0.032725  | -0.020536 | 0.019543  |
| O | -2.459230 | 13.184059 | 5.445139 | -0.026410 | 0.012043  | -0.025032 |
| O | 4.912372  | 0.617542  | 0.921651 | 0.026441  | -0.012007 | 0.025048  |
| O | 2.757943  | 6.283259  | 4.105046 | -0.026418 | -0.012051 | -0.025055 |
| O | -0.304801 | 7.518342  | 2.261744 | 0.026432  | 0.011994  | 0.025022  |
| O | -0.175430 | 2.374756  | 0.744070 | 0.009571  | 0.019598  | -0.005459 |
| O | 2.628573  | 11.426844 | 5.622720 | -0.009580 | -0.019588 | 0.005469  |
| O | 4.783002  | 9.275557  | 2.439325 | 0.009564  | -0.019571 | -0.005452 |
| O | -2.329859 | 4.526044  | 3.927465 | -0.009585 | 0.019613  | 0.005479  |
| O | -1.223866 | 12.517207 | 2.155216 | 0.007438  | 0.048011  | -0.013045 |
| O | 3.677009  | 1.284394  | 4.211574 | -0.007402 | -0.047990 | 0.013045  |
| O | 5.831438  | 5.616407  | 1.028179 | 0.007409  | -0.047959 | -0.013030 |
| O | -3.378295 | 8.185194  | 5.338611 | -0.007425 | 0.048039  | 0.013055  |
| H | -0.637445 | 12.195109 | 2.878812 | 0.001854  | 0.044994  | -0.008627 |
| H | 3.090587  | 1.606491  | 3.487978 | -0.001985 | -0.044830 | 0.008815  |
| H | 5.245016  | 5.294309  | 0.304583 | 0.001954  | -0.044895 | -0.008729 |
| H | -2.791874 | 8.507292  | 6.062207 | -0.001929 | 0.044908  | 0.008756  |

56 f = 24.639755 THz 154.816143 2PiTHz 821.893717 cm-1 101.901870 meV

|    | X         | Y         | Z        | dx        | dy        | dz        |
|----|-----------|-----------|----------|-----------|-----------|-----------|
| Li | 3.769818  | 9.645336  | 4.001386 | 0.000296  | -0.005191 | -0.002909 |
| Li | -1.316675 | 4.156264  | 2.365404 | 0.000299  | -0.005179 | -0.002907 |
| Li | -3.471104 | 2.744536  | 5.548798 | -0.000297 | -0.005181 | 0.002910  |
| Li | 5.924247  | 11.057064 | 0.817991 | -0.000298 | -0.005188 | 0.002910  |

|    |           |           |          |           |           |           |
|----|-----------|-----------|----------|-----------|-----------|-----------|
| Na | 2.049025  | 6.784862  | 1.629696 | -0.000251 | 0.000496  | 0.000232  |
| Na | 0.404117  | 7.016739  | 4.737094 | -0.000250 | 0.000495  | 0.000236  |
| Na | 2.558546  | 13.685662 | 1.553699 | 0.000250  | 0.000495  | -0.000236 |
| Na | -0.105403 | 0.115939  | 4.813091 | 0.000251  | 0.000496  | -0.000231 |
| B  | 4.155007  | 8.978944  | 1.168663 | -0.012757 | 0.068950  | -0.008870 |
| B  | -1.701865 | 4.822656  | 5.198127 | -0.012705 | 0.068888  | -0.008896 |
| B  | 0.452564  | 2.078144  | 2.014732 | 0.012720  | 0.068899  | 0.008897  |
| B  | 2.000578  | 11.723457 | 4.352058 | 0.012741  | 0.068939  | 0.008868  |
| B  | -2.733891 | 11.746082 | 5.839177 | -0.010422 | 0.070385  | -0.013875 |
| B  | 5.187034  | 2.055518  | 0.527613 | -0.010403 | 0.070290  | -0.013876 |
| B  | 3.032605  | 4.845282  | 3.711007 | 0.010402  | 0.070293  | 0.013871  |
| B  | -0.579463 | 8.956318  | 2.655782 | 0.010423  | 0.070373  | 0.013875  |
| B  | -0.983708 | 0.054306  | 1.827988 | -0.000822 | 0.008259  | 0.001226  |
| B  | 3.436850  | 13.747295 | 4.538802 | -0.000829 | 0.008272  | 0.001228  |
| B  | 5.591279  | 6.955106  | 1.355407 | 0.000834  | 0.008276  | -0.001232 |
| B  | -3.138137 | 6.846495  | 5.011383 | 0.000817  | 0.008257  | -0.001223 |
| Si | 0.631772  | 3.486686  | 4.508512 | -0.004705 | -0.030566 | -0.004559 |
| Si | 1.821370  | 10.314915 | 1.858278 | -0.004706 | -0.030604 | -0.004551 |
| Si | -0.333059 | 10.387486 | 5.041673 | 0.004712  | -0.030598 | 0.004554  |
| Si | 2.786201  | 3.414115  | 1.325117 | 0.004699  | -0.030570 | 0.004558  |
| O  | 0.061445  | 3.072947  | 3.041906 | 0.008774  | -0.013981 | 0.000547  |
| O  | 2.391697  | 10.728653 | 3.324884 | 0.008755  | -0.013991 | 0.000517  |
| O  | 4.546126  | 9.973747  | 0.141489 | -0.008755 | -0.013991 | -0.000520 |
| O  | -2.092984 | 3.827853  | 6.225301 | -0.008775 | -0.013982 | -0.000543 |
| O  | 2.197450  | 3.933608  | 4.519003 | 0.001294  | -0.012176 | 0.008596  |
| O  | 0.255692  | 9.867992  | 1.847787 | 0.001316  | -0.012178 | 0.008599  |
| O  | -1.898737 | 10.834409 | 5.031182 | -0.001315 | -0.012184 | -0.008605 |
| O  | 4.351879  | 2.967192  | 1.335608 | -0.001296 | -0.012173 | -0.008592 |
| O  | -0.212316 | 4.798696  | 5.055280 | -0.006396 | 0.011594  | 0.006908  |
| O  | 2.665458  | 9.002905  | 1.311510 | -0.006408 | 0.011624  | 0.006914  |
| O  | 0.511030  | 11.699496 | 4.494905 | 0.006408  | 0.011617  | -0.006910 |
| O  | 1.942113  | 2.102105  | 1.871885 | 0.006397  | 0.011600  | -0.006910 |
| O  | 0.525580  | 2.169271  | 5.472081 | 0.004518  | 0.010233  | -0.004699 |
| O  | 1.927562  | 11.632329 | 0.894709 | 0.004531  | 0.010244  | -0.004693 |
| O  | -0.226867 | 9.070071  | 4.078104 | -0.004529 | 0.010241  | 0.004696  |
| O  | 2.680009  | 4.731529  | 2.288686 | -0.004517 | 0.010232  | 0.004695  |

|   |           |           |          |           |           |           |
|---|-----------|-----------|----------|-----------|-----------|-----------|
| O | 0.058846  | 0.698526  | 2.444964 | 0.031655  | 0.017322  | 0.017936  |
| O | 2.394296  | 13.103075 | 3.921826 | 0.031682  | 0.017335  | 0.017951  |
| O | 4.548725  | 7.599326  | 0.738431 | -0.031686 | 0.017344  | -0.017949 |
| O | -2.095583 | 6.202275  | 5.628359 | -0.031649 | 0.017312  | -0.017937 |
| O | -2.459230 | 13.184059 | 5.445139 | -0.022515 | 0.009479  | -0.026165 |
| O | 4.912372  | 0.617542  | 0.921651 | -0.022507 | 0.009467  | -0.026135 |
| O | 2.757943  | 6.283259  | 4.105046 | 0.022500  | 0.009459  | 0.026124  |
| O | -0.304801 | 7.518342  | 2.261744 | 0.022523  | 0.009488  | 0.026176  |
| O | -0.175430 | 2.374756  | 0.744070 | -0.009051 | -0.020071 | 0.008099  |
| O | 2.628573  | 11.426844 | 5.622720 | -0.009076 | -0.020102 | 0.008107  |
| O | 4.783002  | 9.275557  | 2.439325 | 0.009072  | -0.020102 | -0.008112 |
| O | -2.329859 | 4.526044  | 3.927465 | 0.009057  | -0.020071 | -0.008096 |
| O | -1.223866 | 12.517207 | 2.155216 | -0.012980 | -0.044526 | 0.009772  |
| O | 3.677009  | 1.284394  | 4.211574 | -0.012976 | -0.044582 | 0.009781  |
| O | 5.831438  | 5.616407  | 1.028179 | 0.012971  | -0.044590 | -0.009781 |
| O | -3.378295 | 8.185194  | 5.338611 | 0.012978  | -0.044519 | -0.009768 |
| H | -0.637445 | 12.195109 | 2.878812 | 0.054426  | -0.036783 | -0.036562 |
| H | 3.090587  | 1.606491  | 3.487978 | 0.054324  | -0.036845 | -0.036472 |
| H | 5.245016  | 5.294309  | 0.304583 | -0.054298 | -0.036851 | 0.036448  |
| H | -2.791874 | 8.507292  | 6.062207 | -0.054410 | -0.036744 | 0.036536  |

57 f = 23.785333 THz 149.447657 2PiTHz 793.393295 cm-1 98.368267 meV

|    | X         | Y         | Z        | dx        | dy        | dz        |
|----|-----------|-----------|----------|-----------|-----------|-----------|
| Li | 3.769818  | 9.645336  | 4.001386 | -0.010633 | -0.000354 | -0.015560 |
| Li | -1.316675 | 4.156264  | 2.365404 | 0.010648  | 0.000352  | 0.015598  |
| Li | -3.471104 | 2.744536  | 5.548798 | -0.010609 | 0.000367  | -0.015544 |
| Li | 5.924247  | 11.057064 | 0.817991 | 0.010672  | -0.000339 | 0.015621  |
| Na | 2.049025  | 6.784862  | 1.629696 | -0.001142 | 0.001022  | -0.000618 |
| Na | 0.404117  | 7.016739  | 4.737094 | 0.001144  | -0.001019 | 0.000632  |
| Na | 2.558546  | 13.685662 | 1.553699 | -0.001140 | -0.001018 | -0.000627 |
| Na | -0.105403 | 0.115939  | 4.813091 | 0.001146  | 0.001024  | 0.000623  |
| B  | 4.155007  | 8.978944  | 1.168663 | -0.023362 | -0.026283 | 0.031164  |
| B  | -1.701865 | 4.822656  | 5.198127 | 0.023120  | 0.026271  | -0.031083 |
| B  | 0.452564  | 2.078144  | 2.014732 | -0.023224 | 0.026188  | 0.031064  |
| B  | 2.000578  | 11.723457 | 4.352058 | 0.023244  | -0.026386 | -0.031184 |



|    |           |           |          |           |           |           |
|----|-----------|-----------|----------|-----------|-----------|-----------|
| B  | -2.733891 | 11.746082 | 5.839177 | -0.014387 | 0.024288  | 0.026803  |
| B  | 5.187034  | 2.055518  | 0.527613 | 0.014428  | -0.024500 | -0.026606 |
| B  | 3.032605  | 4.845282  | 3.711007 | -0.014356 | -0.024330 | 0.026645  |
| B  | -0.579463 | 8.956318  | 2.655782 | 0.014468  | 0.024464  | -0.026772 |
| B  | -0.983708 | 0.054306  | 1.827988 | 0.010593  | -0.000349 | 0.006159  |
| B  | 3.436850  | 13.747295 | 4.538802 | -0.010612 | 0.000351  | -0.006136 |
| B  | 5.591279  | 6.955106  | 1.355407 | 0.010627  | 0.000336  | 0.006168  |
| B  | -3.138137 | 6.846495  | 5.011383 | -0.010576 | -0.000359 | -0.006128 |
| Si | 0.631772  | 3.486686  | 4.508512 | -0.000215 | 0.007356  | -0.005200 |
| Si | 1.821370  | 10.314915 | 1.858278 | 0.000232  | -0.007334 | 0.005124  |
| Si | -0.333059 | 10.387486 | 5.041673 | -0.000242 | -0.007357 | -0.005171 |
| Si | 2.786201  | 3.414115  | 1.325117 | 0.000201  | 0.007329  | 0.005156  |
| O  | 0.061445  | 3.072947  | 3.041906 | 0.014485  | 0.004477  | 0.034590  |
| O  | 2.391697  | 10.728653 | 3.324884 | -0.014542 | -0.004515 | -0.034773 |
| O  | 4.546126  | 9.973747  | 0.141489 | 0.014568  | -0.004496 | 0.034702  |
| O  | -2.092984 | 3.827853  | 6.225301 | -0.014462 | 0.004496  | -0.034655 |
| O  | 2.197450  | 3.933608  | 4.519003 | -0.024042 | -0.002533 | -0.005778 |
| O  | 0.255692  | 9.867992  | 1.847787 | 0.024220  | 0.002521  | 0.005788  |
| O  | -1.898737 | 10.834409 | 5.031182 | -0.024142 | 0.002568  | -0.005804 |
| O  | 4.351879  | 2.967192  | 1.335608 | 0.024115  | -0.002488 | 0.005764  |
| O  | -0.212316 | 4.798696  | 5.055280 | 0.019427  | -0.044290 | -0.004537 |
| O  | 2.665458  | 9.002905  | 1.311510 | -0.019595 | 0.044499  | 0.004646  |
| O  | 0.511030  | 11.699496 | 4.494905 | 0.019488  | 0.044444  | -0.004574 |
| O  | 1.942113  | 2.102105  | 1.871885 | -0.019521 | -0.044338 | 0.004600  |
| O  | 0.525580  | 2.169271  | 5.472081 | -0.005983 | 0.030525  | -0.022645 |
| O  | 1.927562  | 11.632329 | 0.894709 | 0.005966  | -0.030709 | 0.022794  |
| O  | -0.226867 | 9.070071  | 4.078104 | -0.005969 | -0.030652 | -0.022709 |
| O  | 2.680009  | 4.731529  | 2.288686 | 0.005981  | 0.030580  | 0.022720  |
| O  | 0.058846  | 0.698526  | 2.444964 | 0.010701  | 0.011906  | -0.009443 |
| O  | 2.394296  | 13.103075 | 3.921826 | -0.010839 | -0.011891 | 0.009371  |
| O  | 4.548725  | 7.599326  | 0.738431 | 0.010773  | -0.011889 | -0.009440 |
| O  | -2.095583 | 6.202275  | 5.628359 | -0.010769 | 0.011900  | 0.009372  |
| O  | -2.459230 | 13.184059 | 5.445139 | -0.000762 | 0.008719  | -0.014274 |
| O  | 4.912372  | 0.617542  | 0.921651 | 0.000905  | -0.008811 | 0.014343  |
| O  | 2.757943  | 6.283259  | 4.105046 | -0.000808 | -0.008729 | -0.014255 |
| O  | -0.304801 | 7.518342  | 2.261744 | 0.000853  | 0.008808  | 0.014364  |

|   |           |           |          |           |           |           |
|---|-----------|-----------|----------|-----------|-----------|-----------|
| O | -0.175430 | 2.374756  | 0.744070 | 0.006133  | -0.003563 | 0.002297  |
| O | 2.628573  | 11.426844 | 5.622720 | -0.006094 | 0.003612  | -0.002228 |
| O | 4.783002  | 9.275557  | 2.439325 | 0.006103  | 0.003571  | 0.002250  |
| O | -2.329859 | 4.526044  | 3.927465 | -0.006125 | -0.003594 | -0.002268 |
| O | -1.223866 | 12.517207 | 2.155216 | -0.025119 | -0.002028 | -0.000642 |
| O | 3.677009  | 1.284394  | 4.211574 | 0.024998  | 0.002191  | 0.000603  |
| O | 5.831438  | 5.616407  | 1.028179 | -0.025066 | 0.002058  | -0.000645 |
| O | -3.378295 | 8.185194  | 5.338611 | 0.025035  | -0.002150 | 0.000610  |
| H | -0.637445 | 12.195109 | 2.878812 | 0.209754  | -0.047294 | -0.205012 |
| H | 3.090587  | 1.606491  | 3.487978 | -0.208313 | 0.047161  | 0.203602  |
| H | 5.245016  | 5.294309  | 0.304583 | 0.209138  | 0.047244  | -0.204457 |
| H | -2.791874 | 8.507292  | 6.062207 | -0.208841 | -0.047177 | 0.204072  |

58 f = 23.667052 THz 148.704472 2PiTHz 789.447847 cm-1 97.879094 meV

|    | X         | Y         | Z        | dx        | dy        | dz        |
|----|-----------|-----------|----------|-----------|-----------|-----------|
| Li | 3.769818  | 9.645336  | 4.001386 | -0.007338 | 0.002008  | -0.012767 |
| Li | -1.316675 | 4.156264  | 2.365404 | -0.007298 | 0.001999  | -0.012696 |
| Li | -3.471104 | 2.744536  | 5.548798 | -0.007336 | -0.001998 | -0.012763 |
| Li | 5.924247  | 11.057064 | 0.817991 | -0.007299 | -0.002010 | -0.012697 |
| Na | 2.049025  | 6.784862  | 1.629696 | -0.000599 | -0.000020 | -0.001070 |
| Na | 0.404117  | 7.016739  | 4.737094 | -0.000593 | -0.000026 | -0.001059 |
| Na | 2.558546  | 13.685662 | 1.553699 | -0.000598 | 0.000020  | -0.001062 |
| Na | -0.105403 | 0.115939  | 4.813091 | -0.000594 | 0.000026  | -0.001067 |
| B  | 4.155007  | 8.978944  | 1.168663 | 0.029935  | -0.028559 | 0.007146  |
| B  | -1.701865 | 4.822656  | 5.198127 | 0.030005  | -0.028480 | 0.007030  |
| B  | 0.452564  | 2.078144  | 2.014732 | 0.029933  | 0.028583  | 0.007165  |
| B  | 2.000578  | 11.723457 | 4.352058 | 0.030006  | 0.028457  | 0.007008  |
| B  | -2.733891 | 11.746082 | 5.839177 | -0.024075 | 0.046509  | -0.012028 |
| B  | 5.187034  | 2.055518  | 0.527613 | -0.024038 | 0.046470  | -0.012128 |
| B  | 3.032605  | 4.845282  | 3.711007 | -0.024099 | -0.046551 | -0.012046 |
| B  | -0.579463 | 8.956318  | 2.655782 | -0.024015 | -0.046420 | -0.012105 |
| B  | -0.983708 | 0.054306  | 1.827988 | -0.002787 | -0.004776 | -0.007674 |
| B  | 3.436850  | 13.747295 | 4.538802 | -0.002819 | -0.004788 | -0.007709 |
| B  | 5.591279  | 6.955106  | 1.355407 | -0.002780 | 0.004782  | -0.007684 |
| B  | -3.138137 | 6.846495  | 5.011383 | -0.002822 | 0.004788  | -0.007700 |

|    |           |           |          |           |           |           |
|----|-----------|-----------|----------|-----------|-----------|-----------|
| Si | 0.631772  | 3.486686  | 4.508512 | 0.001208  | -0.003571 | 0.011653  |
| Si | 1.821370  | 10.314915 | 1.858278 | 0.001212  | -0.003587 | 0.011672  |
| Si | -0.333059 | 10.387486 | 5.041673 | 0.001211  | 0.003561  | 0.011640  |
| Si | 2.786201  | 3.414115  | 1.325117 | 0.001212  | 0.003595  | 0.011682  |
| O  | 0.061445  | 3.072947  | 3.041906 | -0.006641 | 0.005095  | 0.020132  |
| O  | 2.391697  | 10.728653 | 3.324884 | -0.006693 | 0.005080  | 0.019987  |
| O  | 4.546126  | 9.973747  | 0.141489 | -0.006635 | -0.005094 | 0.020118  |
| O  | -2.092984 | 3.827853  | 6.225301 | -0.006700 | -0.005081 | 0.020003  |
| O  | 2.197450  | 3.933608  | 4.519003 | -0.021069 | 0.009020  | 0.006675  |
| O  | 0.255692  | 9.867992  | 1.847787 | -0.020979 | 0.009022  | 0.006694  |
| O  | -1.898737 | 10.834409 | 5.031182 | -0.021062 | -0.009026 | 0.006660  |
| O  | 4.351879  | 2.967192  | 1.335608 | -0.020989 | -0.009020 | 0.006707  |
| O  | -0.212316 | 4.798696  | 5.055280 | 0.031748  | -0.015882 | -0.017934 |
| O  | 2.665458  | 9.002905  | 1.311510 | 0.031649  | -0.015722 | -0.017919 |
| O  | 0.511030  | 11.699496 | 4.494905 | 0.031720  | 0.015873  | -0.017924 |
| O  | 1.942113  | 2.102105  | 1.871885 | 0.031674  | 0.015728  | -0.017926 |
| O  | 0.525580  | 2.169271  | 5.472081 | 0.000813  | 0.014735  | -0.025186 |
| O  | 1.927562  | 11.632329 | 0.894709 | 0.000844  | 0.014638  | -0.025058 |
| O  | -0.226867 | 9.070071  | 4.078104 | 0.000806  | -0.014729 | -0.025157 |
| O  | 2.680009  | 4.731529  | 2.288686 | 0.000846  | -0.014642 | -0.025091 |
| O  | 0.058846  | 0.698526  | 2.444964 | 0.018006  | -0.000592 | 0.019625  |
| O  | 2.394296  | 13.103075 | 3.921826 | 0.017949  | -0.000664 | 0.019668  |
| O  | 4.548725  | 7.599326  | 0.738431 | 0.017985  | 0.000593  | 0.019612  |
| O  | -2.095583 | 6.202275  | 5.628359 | 0.017967  | 0.000663  | 0.019682  |
| O  | -2.459230 | 13.184059 | 5.445139 | -0.024999 | 0.018433  | -0.022976 |
| O  | 4.912372  | 0.617542  | 0.921651 | -0.024998 | 0.018411  | -0.022937 |
| O  | 2.757943  | 6.283259  | 4.105046 | -0.025015 | -0.018435 | -0.022990 |
| O  | -0.304801 | 7.518342  | 2.261744 | -0.024988 | -0.018403 | -0.022922 |
| O  | -0.175430 | 2.374756  | 0.744070 | -0.000828 | -0.010658 | -0.005924 |
| O  | 2.628573  | 11.426844 | 5.622720 | -0.000845 | -0.010622 | -0.005936 |
| O  | 4.783002  | 9.275557  | 2.439325 | -0.000813 | 0.010648  | -0.005906 |
| O  | -2.329859 | 4.526044  | 3.927465 | -0.000854 | 0.010629  | -0.005953 |
| O  | -1.223866 | 12.517207 | 2.155216 | 0.014840  | -0.034381 | 0.008454  |
| O  | 3.677009  | 1.284394  | 4.211574 | 0.014928  | -0.034337 | 0.008447  |
| O  | 5.831438  | 5.616407  | 1.028179 | 0.014827  | 0.034354  | 0.008456  |
| O  | -3.378295 | 8.185194  | 5.338611 | 0.014942  | 0.034364  | 0.008449  |

|   |           |           |          |           |           |          |
|---|-----------|-----------|----------|-----------|-----------|----------|
| H | -0.637445 | 12.195109 | 2.878812 | -0.193357 | 0.010635  | 0.196459 |
| H | 3.090587  | 1.606491  | 3.487978 | -0.194113 | 0.010803  | 0.197165 |
| H | 5.245016  | 5.294309  | 0.304583 | -0.193211 | -0.010610 | 0.196307 |
| H | -2.791874 | 8.507292  | 6.062207 | -0.194288 | -0.010826 | 0.197343 |

59 f = 23.459788 THz 147.402196 2PiTHz 782.534278 cm-1 97.021920 meV

|    | X         | Y         | Z        | dx        | dy        | dz        |
|----|-----------|-----------|----------|-----------|-----------|-----------|
| Li | 3.769818  | 9.645336  | 4.001386 | -0.005623 | 0.000888  | -0.005235 |
| Li | -1.316675 | 4.156264  | 2.365404 | -0.005666 | 0.000884  | -0.005312 |
| Li | -3.471104 | 2.744536  | 5.548798 | 0.005666  | 0.000890  | 0.005302  |
| Li | 5.924247  | 11.057064 | 0.817991 | 0.005631  | 0.000892  | 0.005260  |
| Na | 2.049025  | 6.784862  | 1.629696 | -0.000461 | 0.001300  | -0.000715 |
| Na | 0.404117  | 7.016739  | 4.737094 | -0.000468 | 0.001305  | -0.000712 |
| Na | 2.558546  | 13.685662 | 1.553699 | 0.000467  | 0.001305  | 0.000712  |
| Na | -0.105403 | 0.115939  | 4.813091 | 0.000462  | 0.001303  | 0.000716  |
| B  | 4.155007  | 8.978944  | 1.168663 | -0.049574 | -0.019468 | 0.033584  |
| B  | -1.701865 | 4.822656  | 5.198127 | -0.049537 | -0.019695 | 0.033716  |
| B  | 0.452564  | 2.078144  | 2.014732 | 0.049645  | -0.019548 | -0.033693 |
| B  | 2.000578  | 11.723457 | 4.352058 | 0.049481  | -0.019584 | -0.033593 |
| B  | -2.733891 | 11.746082 | 5.839177 | -0.013287 | 0.007209  | 0.050699  |
| B  | 5.187034  | 2.055518  | 0.527613 | -0.013417 | 0.007406  | 0.050739  |
| B  | 3.032605  | 4.845282  | 3.711007 | 0.013337  | 0.007266  | -0.050777 |
| B  | -0.579463 | 8.956318  | 2.655782 | 0.013354  | 0.007324  | -0.050681 |
| B  | -0.983708 | 0.054306  | 1.827988 | -0.009283 | -0.001023 | -0.003712 |
| B  | 3.436850  | 13.747295 | 4.538802 | -0.009259 | -0.001027 | -0.003687 |
| B  | 5.591279  | 6.955106  | 1.355407 | 0.009255  | -0.001022 | 0.003700  |
| B  | -3.138137 | 6.846495  | 5.011383 | 0.009287  | -0.001022 | 0.003710  |
| Si | 0.631772  | 3.486686  | 4.508512 | 0.009114  | -0.003775 | -0.008743 |
| Si | 1.821370  | 10.314915 | 1.858278 | 0.009135  | -0.003765 | -0.008796 |
| Si | -0.333059 | 10.387486 | 5.041673 | -0.009126 | -0.003758 | 0.008774  |
| Si | 2.786201  | 3.414115  | 1.325117 | -0.009135 | -0.003788 | 0.008766  |
| O  | 0.061445  | 3.072947  | 3.041906 | -0.021335 | -0.008167 | -0.034995 |
| O  | 2.391697  | 10.728653 | 3.324884 | -0.021283 | -0.008169 | -0.034944 |
| O  | 4.546126  | 9.973747  | 0.141489 | 0.021302  | -0.008162 | 0.034893  |
| O  | -2.092984 | 3.827853  | 6.225301 | 0.021322  | -0.008170 | 0.035064  |

|   |           |           |          |           |           |           |
|---|-----------|-----------|----------|-----------|-----------|-----------|
| O | 2.197450  | 3.933608  | 4.519003 | 0.032302  | 0.010785  | 0.005536  |
| O | 0.255692  | 9.867992  | 1.847787 | 0.032285  | 0.010771  | 0.005493  |
| O | -1.898737 | 10.834409 | 5.031182 | -0.032237 | 0.010780  | -0.005513 |
| O | 4.351879  | 2.967192  | 1.335608 | -0.032360 | 0.010786  | -0.005504 |
| O | -0.212316 | 4.798696  | 5.055280 | -0.018484 | 0.052253  | 0.013844  |
| O | 2.665458  | 9.002905  | 1.311510 | -0.018512 | 0.052170  | 0.013893  |
| O | 0.511030  | 11.699496 | 4.494905 | 0.018433  | 0.052130  | -0.013847 |
| O | 1.942113  | 2.102105  | 1.871885 | 0.018577  | 0.052312  | -0.013897 |
| O | 0.525580  | 2.169271  | 5.472081 | -0.005332 | -0.044654 | 0.017554  |
| O | 1.927562  | 11.632329 | 0.894709 | -0.005374 | -0.044603 | 0.017552  |
| O | -0.226867 | 9.070071  | 4.078104 | 0.005367  | -0.044573 | -0.017484 |
| O | 2.680009  | 4.731529  | 2.288686 | 0.005338  | -0.044690 | -0.017646 |
| O | 0.058846  | 0.698526  | 2.444964 | -0.012830 | 0.001481  | 0.010356  |
| O | 2.394296  | 13.103075 | 3.921826 | -0.012857 | 0.001543  | 0.010240  |
| O | 4.548725  | 7.599326  | 0.738431 | 0.012808  | 0.001554  | -0.010296 |
| O | -2.095583 | 6.202275  | 5.628359 | 0.012900  | 0.001459  | -0.010288 |
| O | -2.459230 | 13.184059 | 5.445139 | 0.005308  | -0.005374 | -0.012300 |
| O | 4.912372  | 0.617542  | 0.921651 | 0.005252  | -0.005340 | -0.012392 |
| O | 2.757943  | 6.283259  | 4.105046 | -0.005312 | -0.005338 | 0.012336  |
| O | -0.304801 | 7.518342  | 2.261744 | -0.005262 | -0.005357 | 0.012345  |
| O | -0.175430 | 2.374756  | 0.744070 | 0.013231  | 0.004107  | 0.010789  |
| O | 2.628573  | 11.426844 | 5.622720 | 0.013254  | 0.004109  | 0.010839  |
| O | 4.783002  | 9.275557  | 2.439325 | -0.013260 | 0.004080  | -0.010830 |
| O | -2.329859 | 4.526044  | 3.927465 | -0.013212 | 0.004138  | -0.010801 |
| O | -1.223866 | 12.517207 | 2.155216 | -0.009840 | 0.002403  | -0.001523 |
| O | 3.677009  | 1.284394  | 4.211574 | -0.009873 | 0.002487  | -0.001542 |
| O | 5.831438  | 5.616407  | 1.028179 | 0.009907  | 0.002395  | 0.001515  |
| O | -3.378295 | 8.185194  | 5.338611 | 0.009777  | 0.002519  | 0.001556  |
| H | -0.637445 | 12.195109 | 2.878812 | 0.107736  | 0.006719  | -0.088525 |
| H | 3.090587  | 1.606491  | 3.487978 | 0.108147  | 0.006668  | -0.088947 |
| H | 5.245016  | 5.294309  | 0.304583 | -0.108378 | 0.006607  | 0.089119  |
| H | -2.791874 | 8.507292  | 6.062207 | -0.107307 | 0.006864  | 0.088155  |

60 f = 23.434661 THz 147.244320 2PiTHz 781.696138 cm-1 96.918004  
meV

X Y Z dx dy dz

|    |           |           |          |           |           |           |
|----|-----------|-----------|----------|-----------|-----------|-----------|
| Li | 3.769818  | 9.645336  | 4.001386 | -0.001841 | 0.000753  | -0.009342 |
| Li | -1.316675 | 4.156264  | 2.365404 | 0.001809  | -0.000737 | 0.009304  |
| Li | -3.471104 | 2.744536  | 5.548798 | 0.001829  | 0.000742  | 0.009328  |
| Li | 5.924247  | 11.057064 | 0.817991 | -0.001822 | -0.000747 | -0.009318 |
| Na | 2.049025  | 6.784862  | 1.629696 | -0.000425 | 0.001066  | -0.000570 |
| Na | 0.404117  | 7.016739  | 4.737094 | 0.000422  | -0.001062 | 0.000567  |
| Na | 2.558546  | 13.685662 | 1.553699 | 0.000424  | 0.001066  | 0.000570  |
| Na | -0.105403 | 0.115939  | 4.813091 | -0.000423 | -0.001063 | -0.000568 |
| B  | 4.155007  | 8.978944  | 1.168663 | 0.038547  | -0.052724 | 0.007616  |
| B  | -1.701865 | 4.822656  | 5.198127 | -0.038651 | 0.052723  | -0.007553 |
| B  | 0.452564  | 2.078144  | 2.014732 | -0.038558 | -0.052752 | -0.007630 |
| B  | 2.000578  | 11.723457 | 4.352058 | 0.038679  | 0.052674  | 0.007512  |
| B  | -2.733891 | 11.746082 | 5.839177 | -0.026431 | 0.044225  | -0.008277 |
| B  | 5.187034  | 2.055518  | 0.527613 | 0.026415  | -0.044240 | 0.008395  |
| B  | 3.032605  | 4.845282  | 3.711007 | 0.026438  | 0.044240  | 0.008304  |
| B  | -0.579463 | 8.956318  | 2.655782 | -0.026395 | -0.044211 | -0.008413 |
| B  | -0.983708 | 0.054306  | 1.827988 | -0.000500 | -0.000358 | 0.002477  |
| B  | 3.436850  | 13.747295 | 4.538802 | 0.000477  | 0.000353  | -0.002502 |
| B  | 5.591279  | 6.955106  | 1.355407 | 0.000507  | -0.000359 | -0.002496 |
| B  | -3.138137 | 6.846495  | 5.011383 | -0.000475 | 0.000357  | 0.002476  |
| Si | 0.631772  | 3.486686  | 4.508512 | 0.006493  | -0.005112 | -0.006758 |
| Si | 1.821370  | 10.314915 | 1.858278 | -0.006459 | 0.005093  | 0.006737  |
| Si | -0.333059 | 10.387486 | 5.041673 | -0.006484 | -0.005103 | 0.006757  |
| Si | 2.786201  | 3.414115  | 1.325117 | 0.006470  | 0.005095  | -0.006738 |
| O  | 0.061445  | 3.072947  | 3.041906 | 0.004310  | 0.000146  | -0.023563 |
| O  | 2.391697  | 10.728653 | 3.324884 | -0.004379 | -0.000152 | 0.023463  |
| O  | 4.546126  | 9.973747  | 0.141489 | -0.004316 | 0.000132  | 0.023561  |
| O  | -2.092984 | 3.827853  | 6.225301 | 0.004354  | -0.000165 | -0.023487 |
| O  | 2.197450  | 3.933608  | 4.519003 | 0.020657  | -0.001982 | -0.010732 |
| O  | 0.255692  | 9.867992  | 1.847787 | -0.020573 | 0.002016  | 0.010753  |
| O  | -1.898737 | 10.834409 | 5.031182 | -0.020661 | -0.001986 | 0.010738  |
| O  | 4.351879  | 2.967192  | 1.335608 | 0.020597  | 0.002004  | -0.010746 |
| O  | -0.212316 | 4.798696  | 5.055280 | -0.034044 | 0.018255  | 0.018431  |
| O  | 2.665458  | 9.002905  | 1.311510 | 0.033981  | -0.018101 | -0.018400 |
| O  | 0.511030  | 11.699496 | 4.494905 | 0.034038  | 0.018246  | -0.018433 |
| O  | 1.942113  | 2.102105  | 1.871885 | -0.033998 | -0.018138 | 0.018405  |

|   |           |           |          |           |           |           |
|---|-----------|-----------|----------|-----------|-----------|-----------|
| O | 0.525580  | 2.169271  | 5.472081 | -0.000758 | -0.009788 | 0.031067  |
| O | 1.927562  | 11.632329 | 0.894709 | 0.000749  | 0.009671  | -0.031000 |
| O | -0.226867 | 9.070071  | 4.078104 | 0.000760  | -0.009792 | -0.031053 |
| O | 2.680009  | 4.731529  | 2.288686 | -0.000752 | 0.009704  | 0.031023  |
| O | 0.058846  | 0.698526  | 2.444964 | -0.019641 | -0.009461 | -0.019256 |
| O | 2.394296  | 13.103075 | 3.921826 | 0.019600  | 0.009445  | 0.019292  |
| O | 4.548725  | 7.599326  | 0.738431 | 0.019636  | -0.009444 | 0.019263  |
| O | -2.095583 | 6.202275  | 5.628359 | -0.019620 | 0.009467  | -0.019280 |
| O | -2.459230 | 13.184059 | 5.445139 | -0.016101 | 0.006323  | -0.018466 |
| O | 4.912372  | 0.617542  | 0.921651 | 0.016108  | -0.006324 | 0.018437  |
| O | 2.757943  | 6.283259  | 4.105046 | 0.016091  | 0.006320  | 0.018468  |
| O | -0.304801 | 7.518342  | 2.261744 | -0.016125 | -0.006329 | -0.018428 |
| O | -0.175430 | 2.374756  | 0.744070 | -0.003816 | 0.014725  | 0.000748  |
| O | 2.628573  | 11.426844 | 5.622720 | 0.003844  | -0.014694 | -0.000728 |
| O | 4.783002  | 9.275557  | 2.439325 | 0.003816  | 0.014705  | -0.000753 |
| O | -2.329859 | 4.526044  | 3.927465 | -0.003831 | -0.014720 | 0.000727  |
| O | -1.223866 | 12.517207 | 2.155216 | 0.020194  | 0.040803  | -0.012834 |
| O | 3.677009  | 1.284394  | 4.211574 | -0.020202 | -0.040782 | 0.012827  |
| O | 5.831438  | 5.616407  | 1.028179 | -0.020156 | 0.040786  | 0.012822  |
| O | -3.378295 | 8.185194  | 5.338611 | 0.020231  | -0.040808 | -0.012832 |
| H | -0.637445 | 12.195109 | 2.878812 | -0.153722 | 0.047462  | 0.129015  |
| H | 3.090587  | 1.606491  | 3.487978 | 0.153832  | -0.047384 | -0.129078 |
| H | 5.245016  | 5.294309  | 0.304583 | 0.153344  | 0.047351  | -0.128654 |
| H | -2.791874 | 8.507292  | 6.062207 | -0.154140 | -0.047474 | 0.129368  |

61 f = 23.195893 THz 145.744094 2PiTHz 773.731680 cm-1 95.930537  
meV

|    | X         | Y         | Z        | dx        | dy        | dz        |
|----|-----------|-----------|----------|-----------|-----------|-----------|
| Li | 3.769818  | 9.645336  | 4.001386 | -0.011443 | 0.011755  | -0.017425 |
| Li | -1.316675 | 4.156264  | 2.365404 | -0.011434 | 0.011738  | -0.017409 |
| Li | -3.471104 | 2.744536  | 5.548798 | -0.011447 | -0.011752 | -0.017415 |
| Li | 5.924247  | 11.057064 | 0.817991 | -0.011446 | -0.011754 | -0.017440 |
| Na | 2.049025  | 6.784862  | 1.629696 | -0.000754 | 0.002511  | -0.001213 |
| Na | 0.404117  | 7.016739  | 4.737094 | -0.000748 | 0.002510  | -0.001214 |
| Na | 2.558546  | 13.685662 | 1.553699 | -0.000748 | -0.002509 | -0.001215 |
| Na | -0.105403 | 0.115939  | 4.813091 | -0.000755 | -0.002513 | -0.001215 |

|    |           |           |          |           |           |           |
|----|-----------|-----------|----------|-----------|-----------|-----------|
| B  | 4.155007  | 8.978944  | 1.168663 | -0.012173 | 0.035005  | -0.017174 |
| B  | -1.701865 | 4.822656  | 5.198127 | -0.012071 | 0.034977  | -0.017178 |
| B  | 0.452564  | 2.078144  | 2.014732 | -0.012087 | -0.034947 | -0.017176 |
| B  | 2.000578  | 11.723457 | 4.352058 | -0.012075 | -0.035065 | -0.017207 |
| B  | -2.733891 | 11.746082 | 5.839177 | 0.016542  | -0.032733 | 0.018785  |
| B  | 5.187034  | 2.055518  | 0.527613 | 0.016500  | -0.032600 | 0.018671  |
| B  | 3.032605  | 4.845282  | 3.711007 | 0.016514  | 0.032655  | 0.018689  |
| B  | -0.579463 | 8.956318  | 2.655782 | 0.016556  | 0.032761  | 0.018682  |
| B  | -0.983708 | 0.054306  | 1.827988 | 0.001736  | 0.001345  | -0.014795 |
| B  | 3.436850  | 13.747295 | 4.538802 | 0.001733  | 0.001338  | -0.014800 |
| B  | 5.591279  | 6.955106  | 1.355407 | 0.001747  | -0.001334 | -0.014789 |
| B  | -3.138137 | 6.846495  | 5.011383 | 0.001730  | -0.001342 | -0.014786 |
| Si | 0.631772  | 3.486686  | 4.508512 | 0.014956  | -0.007811 | -0.003405 |
| Si | 1.821370  | 10.314915 | 1.858278 | 0.014989  | -0.007801 | -0.003442 |
| Si | -0.333059 | 10.387486 | 5.041673 | 0.014973  | 0.007803  | -0.003422 |
| Si | 2.786201  | 3.414115  | 1.325117 | 0.014969  | 0.007801  | -0.003411 |
| O  | 0.061445  | 3.072947  | 3.041906 | -0.003704 | 0.002961  | -0.017386 |
| O  | 2.391697  | 10.728653 | 3.324884 | -0.003726 | 0.002949  | -0.017445 |
| O  | 4.546126  | 9.973747  | 0.141489 | -0.003688 | -0.002950 | -0.017408 |
| O  | -2.092984 | 3.827853  | 6.225301 | -0.003712 | -0.002964 | -0.017389 |
| O  | 2.197450  | 3.933608  | 4.519003 | 0.009812  | 0.009814  | -0.008438 |
| O  | 0.255692  | 9.867992  | 1.847787 | 0.009878  | 0.009834  | -0.008456 |
| O  | -1.898737 | 10.834409 | 5.031182 | 0.009818  | -0.009806 | -0.008448 |
| O  | 4.351879  | 2.967192  | 1.335608 | 0.009818  | -0.009833 | -0.008461 |
| O  | -0.212316 | 4.798696  | 5.055280 | -0.019914 | 0.018975  | 0.009427  |
| O  | 2.665458  | 9.002905  | 1.311510 | -0.019987 | 0.019065  | 0.009468  |
| O  | 0.511030  | 11.699496 | 4.494905 | -0.019958 | -0.018984 | 0.009435  |
| O  | 1.942113  | 2.102105  | 1.871885 | -0.019930 | -0.019004 | 0.009433  |
| O  | 0.525580  | 2.169271  | 5.472081 | -0.004568 | -0.009840 | 0.024988  |
| O  | 1.927562  | 11.632329 | 0.894709 | -0.004609 | -0.009944 | 0.025020  |
| O  | -0.226867 | 9.070071  | 4.078104 | -0.004580 | 0.009854  | 0.025020  |
| O  | 2.680009  | 4.731529  | 2.288686 | -0.004582 | 0.009867  | 0.024977  |
| O  | 0.058846  | 0.698526  | 2.444964 | -0.019680 | -0.019414 | -0.006922 |
| O  | 2.394296  | 13.103075 | 3.921826 | -0.019758 | -0.019396 | -0.006980 |
| O  | 4.548725  | 7.599326  | 0.738431 | -0.019740 | 0.019406  | -0.006988 |
| O  | -2.095583 | 6.202275  | 5.628359 | -0.019701 | 0.019410  | -0.006936 |



|   |           |           |          |           |           |           |
|---|-----------|-----------|----------|-----------|-----------|-----------|
| O | -2.459230 | 13.184059 | 5.445139 | 0.007430  | 0.013424  | 0.010671  |
| O | 4.912372  | 0.617542  | 0.921651 | 0.007367  | 0.013413  | 0.010635  |
| O | 2.757943  | 6.283259  | 4.105046 | 0.007383  | -0.013413 | 0.010642  |
| O | -0.304801 | 7.518342  | 2.261744 | 0.007440  | -0.013439 | 0.010691  |
| O | -0.175430 | 2.374756  | 0.744070 | -0.008165 | 0.010920  | 0.000781  |
| O | 2.628573  | 11.426844 | 5.622720 | -0.008153 | 0.010934  | 0.000848  |
| O | 4.783002  | 9.275557  | 2.439325 | -0.008195 | -0.010924 | 0.000820  |
| O | -2.329859 | 4.526044  | 3.927465 | -0.008161 | -0.010931 | 0.000795  |
| O | -1.223866 | 12.517207 | 2.155216 | 0.029259  | 0.024382  | -0.003363 |
| O | 3.677009  | 1.284394  | 4.211574 | 0.029250  | 0.024456  | -0.003375 |
| O | 5.831438  | 5.616407  | 1.028179 | 0.029227  | -0.024458 | -0.003367 |
| O | -3.378295 | 8.185194  | 5.338611 | 0.029243  | -0.024396 | -0.003361 |
| H | -0.637445 | 12.195109 | 2.878812 | -0.235957 | 0.092394  | 0.234194  |
| H | 3.090587  | 1.606491  | 3.487978 | -0.235685 | 0.092387  | 0.233914  |
| H | 5.245016  | 5.294309  | 0.304583 | -0.235530 | -0.092307 | 0.233750  |
| H | -2.791874 | 8.507292  | 6.062207 | -0.235708 | -0.092355 | 0.233953  |

62 f = 23.004465 THz 144.541318 2PiTHz 767.346339 cm-1 95.138855  
meV

|    | X         | Y         | Z        | dx        | dy        | dz        |
|----|-----------|-----------|----------|-----------|-----------|-----------|
| Li | 3.769818  | 9.645336  | 4.001386 | -0.012219 | 0.007144  | -0.017574 |
| Li | -1.316675 | 4.156264  | 2.365404 | -0.012175 | 0.007138  | -0.017480 |
| Li | -3.471104 | 2.744536  | 5.548798 | 0.012169  | 0.007132  | 0.017468  |
| Li | 5.924247  | 11.057064 | 0.817991 | 0.012204  | 0.007128  | 0.017559  |
| Na | 2.049025  | 6.784862  | 1.629696 | -0.001721 | 0.001217  | -0.001898 |
| Na | 0.404117  | 7.016739  | 4.737094 | -0.001713 | 0.001202  | -0.001892 |
| Na | 2.558546  | 13.685662 | 1.553699 | 0.001713  | 0.001202  | 0.001892  |
| Na | -0.105403 | 0.115939  | 4.813091 | 0.001719  | 0.001213  | 0.001896  |
| B  | 4.155007  | 8.978944  | 1.168663 | 0.022878  | 0.009778  | -0.001170 |
| B  | -1.701865 | 4.822656  | 5.198127 | 0.022504  | 0.009678  | -0.001044 |
| B  | 0.452564  | 2.078144  | 2.014732 | -0.022496 | 0.009683  | 0.001039  |
| B  | 2.000578  | 11.723457 | 4.352058 | -0.022911 | 0.009706  | 0.001139  |
| B  | -2.733891 | 11.746082 | 5.839177 | 0.010310  | -0.039957 | -0.026714 |
| B  | 5.187034  | 2.055518  | 0.527613 | 0.010234  | -0.039808 | -0.026338 |
| B  | 3.032605  | 4.845282  | 3.711007 | -0.010242 | -0.039815 | 0.026338  |
| B  | -0.579463 | 8.956318  | 2.655782 | -0.010279 | -0.039882 | 0.026751  |

|    |           |           |          |           |           |           |
|----|-----------|-----------|----------|-----------|-----------|-----------|
| B  | -0.983708 | 0.054306  | 1.827988 | -0.001746 | -0.000115 | 0.012436  |
| B  | 3.436850  | 13.747295 | 4.538802 | -0.001706 | -0.000109 | 0.012453  |
| B  | 5.591279  | 6.955106  | 1.355407 | 0.001709  | -0.000101 | -0.012469 |
| B  | -3.138137 | 6.846495  | 5.011383 | 0.001750  | -0.000111 | -0.012449 |
| Si | 0.631772  | 3.486686  | 4.508512 | 0.002019  | -0.001047 | 0.000429  |
| Si | 1.821370  | 10.314915 | 1.858278 | 0.001956  | -0.001057 | 0.000538  |
| Si | -0.333059 | 10.387486 | 5.041673 | -0.001939 | -0.001051 | -0.000546 |
| Si | 2.786201  | 3.414115  | 1.325117 | -0.002013 | -0.001040 | -0.000424 |
| O  | 0.061445  | 3.072947  | 3.041906 | 0.008891  | -0.003630 | 0.002523  |
| O  | 2.391697  | 10.728653 | 3.324884 | 0.009034  | -0.003597 | 0.002620  |
| O  | 4.546126  | 9.973747  | 0.141489 | -0.009033 | -0.003597 | -0.002656 |
| O  | -2.092984 | 3.827853  | 6.225301 | -0.008898 | -0.003636 | -0.002520 |
| O  | 2.197450  | 3.933608  | 4.519003 | -0.015278 | 0.000217  | -0.002695 |
| O  | 0.255692  | 9.867992  | 1.847787 | -0.015470 | 0.000150  | -0.002726 |
| O  | -1.898737 | 10.834409 | 5.031182 | 0.015497  | 0.000142  | 0.002709  |
| O  | 4.351879  | 2.967192  | 1.335608 | 0.015273  | 0.000213  | 0.002698  |
| O  | -0.212316 | 4.798696  | 5.055280 | -0.000315 | -0.001806 | -0.006959 |
| O  | 2.665458  | 9.002905  | 1.311510 | -0.000273 | -0.002023 | -0.007077 |
| O  | 0.511030  | 11.699496 | 4.494905 | 0.000230  | -0.002049 | 0.007099  |
| O  | 1.942113  | 2.102105  | 1.871885 | 0.000325  | -0.001812 | 0.006955  |
| O  | 0.525580  | 2.169271  | 5.472081 | 0.006574  | 0.014765  | 0.003987  |
| O  | 1.927562  | 11.632329 | 0.894709 | 0.006684  | 0.015037  | 0.004010  |
| O  | -0.226867 | 9.070071  | 4.078104 | -0.006690 | 0.015055  | -0.003963 |
| O  | 2.680009  | 4.731529  | 2.288686 | -0.006570 | 0.014761  | -0.003990 |
| O  | 0.058846  | 0.698526  | 2.444964 | -0.003600 | 0.000337  | -0.005351 |
| O  | 2.394296  | 13.103075 | 3.921826 | -0.003544 | 0.000218  | -0.005344 |
| O  | 4.548725  | 7.599326  | 0.738431 | 0.003508  | 0.000250  | 0.005330  |
| O  | -2.095583 | 6.202275  | 5.628359 | 0.003601  | 0.000352  | 0.005361  |
| O  | -2.459230 | 13.184059 | 5.445139 | 0.016218  | 0.003584  | 0.008082  |
| O  | 4.912372  | 0.617542  | 0.921651 | 0.016234  | 0.003512  | 0.008019  |
| O  | 2.757943  | 6.283259  | 4.105046 | -0.016245 | 0.003503  | -0.008025 |
| O  | -0.304801 | 7.518342  | 2.261744 | -0.016200 | 0.003585  | -0.008059 |
| O  | -0.175430 | 2.374756  | 0.744070 | -0.015964 | 0.001161  | -0.002952 |
| O  | 2.628573  | 11.426844 | 5.622720 | -0.016151 | 0.001211  | -0.003112 |
| O  | 4.783002  | 9.275557  | 2.439325 | 0.016146  | 0.001185  | 0.003113  |
| O  | -2.329859 | 4.526044  | 3.927465 | 0.015962  | 0.001160  | 0.002943  |

|   |           |           |          |           |           |           |
|---|-----------|-----------|----------|-----------|-----------|-----------|
| O | -1.223866 | 12.517207 | 2.155216 | -0.025251 | 0.006678  | 0.001096  |
| O | 3.677009  | 1.284394  | 4.211574 | -0.025127 | 0.006746  | 0.001071  |
| O | 5.831438  | 5.616407  | 1.028179 | 0.025149  | 0.006692  | -0.001076 |
| O | -3.378295 | 8.185194  | 5.338611 | 0.025271  | 0.006688  | -0.001092 |
| H | -0.637445 | 12.195109 | 2.878812 | 0.303682  | -0.061155 | -0.290342 |
| H | 3.090587  | 1.606491  | 3.487978 | 0.302561  | -0.060858 | -0.289244 |
| H | 5.245016  | 5.294309  | 0.304583 | -0.302697 | -0.060937 | 0.289374  |
| H | -2.791874 | 8.507292  | 6.062207 | -0.303938 | -0.061219 | 0.290594  |

63 f = 22.936628 THz 144.115081 2PiTHz 765.083519 cm-1 94.858301 meV

|    | X         | Y         | Z        | dx        | dy        | dz        |
|----|-----------|-----------|----------|-----------|-----------|-----------|
| Li | 3.769818  | 9.645336  | 4.001386 | -0.007321 | 0.000445  | -0.015200 |
| Li | -1.316675 | 4.156264  | 2.365404 | 0.007397  | -0.000486 | 0.015337  |
| Li | -3.471104 | 2.744536  | 5.548798 | -0.007407 | -0.000498 | -0.015338 |
| Li | 5.924247  | 11.057064 | 0.817991 | 0.007314  | 0.000440  | 0.015205  |
| Na | 2.049025  | 6.784862  | 1.629696 | -0.001637 | 0.001906  | -0.000664 |
| Na | 0.404117  | 7.016739  | 4.737094 | 0.001650  | -0.001911 | 0.000656  |
| Na | 2.558546  | 13.685662 | 1.553699 | -0.001650 | -0.001913 | -0.000657 |
| Na | -0.105403 | 0.115939  | 4.813091 | 0.001639  | 0.001905  | 0.000664  |
| B  | 4.155007  | 8.978944  | 1.168663 | 0.053867  | 0.004682  | -0.009620 |
| B  | -1.701865 | 4.822656  | 5.198127 | -0.054083 | -0.004699 | 0.009578  |
| B  | 0.452564  | 2.078144  | 2.014732 | 0.054053  | -0.004767 | -0.009613 |
| B  | 2.000578  | 11.723457 | 4.352058 | -0.053885 | 0.004651  | 0.009591  |
| B  | -2.733891 | 11.746082 | 5.839177 | 0.002970  | -0.014127 | -0.050573 |
| B  | 5.187034  | 2.055518  | 0.527613 | -0.003008 | 0.014340  | 0.050808  |
| B  | 3.032605  | 4.845282  | 3.711007 | 0.003041  | 0.014434  | -0.050776 |
| B  | -0.579463 | 8.956318  | 2.655782 | -0.002971 | -0.014098 | 0.050581  |
| B  | -0.983708 | 0.054306  | 1.827988 | -0.004048 | 0.000938  | -0.000758 |
| B  | 3.436850  | 13.747295 | 4.538802 | 0.004065  | -0.000929 | 0.000654  |
| B  | 5.591279  | 6.955106  | 1.355407 | -0.004056 | -0.000934 | -0.000673 |
| B  | -3.138137 | 6.846495  | 5.011383 | 0.004064  | 0.000940  | 0.000737  |
| Si | 0.631772  | 3.486686  | 4.508512 | 0.011115  | 0.001783  | -0.018782 |
| Si | 1.821370  | 10.314915 | 1.858278 | -0.011104 | -0.001789 | 0.018757  |
| Si | -0.333059 | 10.387486 | 5.041673 | 0.011115  | -0.001783 | -0.018747 |
| Si | 2.786201  | 3.414115  | 1.325117 | -0.011100 | 0.001787  | 0.018774  |

|   |           |           |          |           |           |           |
|---|-----------|-----------|----------|-----------|-----------|-----------|
| O | 0.061445  | 3.072947  | 3.041906 | -0.017016 | -0.005533 | -0.012913 |
| O | 2.391697  | 10.728653 | 3.324884 | 0.016945  | 0.005561  | 0.012862  |
| O | 4.546126  | 9.973747  | 0.141489 | -0.016959 | 0.005547  | -0.012880 |
| O | -2.092984 | 3.827853  | 6.225301 | 0.017007  | -0.005540 | 0.012874  |
| O | 2.197450  | 3.933608  | 4.519003 | 0.025195  | 0.008680  | 0.003027  |
| O | 0.255692  | 9.867992  | 1.847787 | -0.025046 | -0.008679 | -0.003023 |
| O | -1.898737 | 10.834409 | 5.031182 | 0.025065  | -0.008678 | 0.003016  |
| O | 4.351879  | 2.967192  | 1.335608 | -0.025160 | 0.008682  | -0.003037 |
| O | -0.212316 | 4.798696  | 5.055280 | -0.005029 | 0.027562  | 0.018723  |
| O | 2.665458  | 9.002905  | 1.311510 | 0.005001  | -0.027483 | -0.018646 |
| O | 0.511030  | 11.699496 | 4.494905 | -0.005011 | -0.027503 | 0.018652  |
| O | 1.942113  | 2.102105  | 1.871885 | 0.004982  | 0.027527  | -0.018701 |
| O | 0.525580  | 2.169271  | 5.472081 | -0.017697 | -0.036718 | -0.002191 |
| O | 1.927562  | 11.632329 | 0.894709 | 0.017633  | 0.036565  | 0.002185  |
| O | -0.226867 | 9.070071  | 4.078104 | -0.017624 | 0.036568  | -0.002158 |
| O | 2.680009  | 4.731529  | 2.288686 | 0.017693  | -0.036693 | 0.002242  |
| O | 0.058846  | 0.698526  | 2.444964 | -0.007889 | 0.019640  | -0.004990 |
| O | 2.394296  | 13.103075 | 3.921826 | 0.007897  | -0.019672 | 0.005036  |
| O | 4.548725  | 7.599326  | 0.738431 | -0.007898 | -0.019623 | -0.005002 |
| O | -2.095583 | 6.202275  | 5.628359 | 0.007862  | 0.019688  | 0.005002  |
| O | -2.459230 | 13.184059 | 5.445139 | -0.002980 | 0.014594  | 0.004304  |
| O | 4.912372  | 0.617542  | 0.921651 | 0.002866  | -0.014626 | -0.004351 |
| O | 2.757943  | 6.283259  | 4.105046 | -0.002866 | -0.014602 | 0.004377  |
| O | -0.304801 | 7.518342  | 2.261744 | 0.002958  | 0.014612  | -0.004300 |
| O | -0.175430 | 2.374756  | 0.744070 | 0.028620  | -0.005838 | 0.025786  |
| O | 2.628573  | 11.426844 | 5.622720 | -0.028482 | 0.005868  | -0.025761 |
| O | 4.783002  | 9.275557  | 2.439325 | 0.028484  | 0.005824  | 0.025725  |
| O | -2.329859 | 4.526044  | 3.927465 | -0.028615 | -0.005897 | -0.025803 |
| O | -1.223866 | 12.517207 | 2.155216 | -0.018868 | -0.004776 | 0.001963  |
| O | 3.677009  | 1.284394  | 4.211574 | 0.019063  | 0.004775  | -0.001982 |
| O | 5.831438  | 5.616407  | 1.028179 | -0.019043 | 0.004743  | 0.001971  |
| O | -3.378295 | 8.185194  | 5.338611 | 0.018878  | -0.004848 | -0.001976 |
| H | -0.637445 | 12.195109 | 2.878812 | 0.179122  | -0.043226 | -0.176057 |
| H | 3.090587  | 1.606491  | 3.487978 | -0.181316 | 0.043741  | 0.178159  |
| H | 5.245016  | 5.294309  | 0.304583 | 0.181179  | 0.043639  | -0.178018 |
| H | -2.791874 | 8.507292  | 6.062207 | -0.179160 | -0.043310 | 0.176083  |

64 f = 22.721266 THz 142.761924 2PiTHz 757.899829 cm-1 93.967636

meV

|    | X         | Y         | Z        | dx        | dy        | dz        |
|----|-----------|-----------|----------|-----------|-----------|-----------|
| Li | 3.769818  | 9.645336  | 4.001386 | -0.006308 | 0.011506  | -0.017236 |
| Li | -1.316675 | 4.156264  | 2.365404 | 0.006342  | -0.011523 | 0.017279  |
| Li | -3.471104 | 2.744536  | 5.548798 | 0.006333  | 0.011523  | 0.017254  |
| Li | 5.924247  | 11.057064 | 0.817991 | -0.006309 | -0.011506 | -0.017240 |
| Na | 2.049025  | 6.784862  | 1.629696 | -0.001887 | 0.001976  | -0.002044 |
| Na | 0.404117  | 7.016739  | 4.737094 | 0.001890  | -0.001975 | 0.002043  |
| Na | 2.558546  | 13.685662 | 1.553699 | 0.001888  | 0.001975  | 0.002042  |
| Na | -0.105403 | 0.115939  | 4.813091 | -0.001887 | -0.001974 | -0.002044 |
| B  | 4.155007  | 8.978944  | 1.168663 | 0.008423  | 0.008210  | -0.008854 |
| B  | -1.701865 | 4.822656  | 5.198127 | -0.008435 | -0.008265 | 0.008865  |
| B  | 0.452564  | 2.078144  | 2.014732 | -0.008420 | 0.008258  | 0.008884  |
| B  | 2.000578  | 11.723457 | 4.352058 | 0.008403  | -0.008218 | -0.008835 |
| B  | -2.733891 | 11.746082 | 5.839177 | 0.017337  | -0.045387 | 0.028357  |
| B  | 5.187034  | 2.055518  | 0.527613 | -0.017342 | 0.045435  | -0.028368 |
| B  | 3.032605  | 4.845282  | 3.711007 | -0.017335 | -0.045411 | -0.028384 |
| B  | -0.579463 | 8.956318  | 2.655782 | 0.017346  | 0.045399  | 0.028374  |
| B  | -0.983708 | 0.054306  | 1.827988 | -0.004622 | 0.003106  | 0.003964  |
| B  | 3.436850  | 13.747295 | 4.538802 | 0.004612  | -0.003101 | -0.003929 |
| B  | 5.591279  | 6.955106  | 1.355407 | 0.004608  | 0.003096  | -0.003923 |
| B  | -3.138137 | 6.846495  | 5.011383 | -0.004620 | -0.003103 | 0.003968  |
| Si | 0.631772  | 3.486686  | 4.508512 | -0.000837 | -0.005602 | 0.013729  |
| Si | 1.821370  | 10.314915 | 1.858278 | 0.000811  | 0.005618  | -0.013738 |
| Si | -0.333059 | 10.387486 | 5.041673 | 0.000820  | -0.005616 | -0.013748 |
| Si | 2.786201  | 3.414115  | 1.325117 | -0.000833 | 0.005604  | 0.013736  |
| O  | 0.061445  | 3.072947  | 3.041906 | -0.002079 | 0.007189  | 0.010773  |
| O  | 2.391697  | 10.728653 | 3.324884 | 0.002105  | -0.007202 | -0.010752 |
| O  | 4.546126  | 9.973747  | 0.141489 | 0.002097  | 0.007208  | -0.010760 |
| O  | -2.092984 | 3.827853  | 6.225301 | -0.002079 | -0.007188 | 0.010771  |
| O  | 2.197450  | 3.933608  | 4.519003 | -0.007037 | -0.002645 | 0.001164  |
| O  | 0.255692  | 9.867992  | 1.847787 | 0.007029  | 0.002626  | -0.001160 |
| O  | -1.898737 | 10.834409 | 5.031182 | 0.007038  | -0.002630 | -0.001159 |
| O  | 4.351879  | 2.967192  | 1.335608 | -0.007044 | 0.002641  | 0.001160  |

|   |           |           |          |           |           |           |
|---|-----------|-----------|----------|-----------|-----------|-----------|
| O | -0.212316 | 4.798696  | 5.055280 | 0.016588  | -0.006305 | -0.003593 |
| O | 2.665458  | 9.002905  | 1.311510 | -0.016587 | 0.006269  | 0.003592  |
| O | 0.511030  | 11.699496 | 4.494905 | -0.016591 | -0.006288 | 0.003599  |
| O | 1.942113  | 2.102105  | 1.871885 | 0.016582  | 0.006302  | -0.003601 |
| O | 0.525580  | 2.169271  | 5.472081 | 0.009046  | 0.014737  | -0.011385 |
| O | 1.927562  | 11.632329 | 0.894709 | -0.009046 | -0.014730 | 0.011358  |
| O | -0.226867 | 9.070071  | 4.078104 | -0.009051 | 0.014744  | 0.011364  |
| O | 2.680009  | 4.731529  | 2.288686 | 0.009054  | -0.014742 | -0.011378 |
| O | 0.058846  | 0.698526  | 2.444964 | 0.018232  | -0.008430 | 0.013688  |
| O | 2.394296  | 13.103075 | 3.921826 | -0.018226 | 0.008481  | -0.013727 |
| O | 4.548725  | 7.599326  | 0.738431 | -0.018228 | -0.008489 | -0.013726 |
| O | -2.095583 | 6.202275  | 5.628359 | 0.018233  | 0.008445  | 0.013699  |
| O | -2.459230 | 13.184059 | 5.445139 | 0.018265  | 0.001164  | 0.013585  |
| O | 4.912372  | 0.617542  | 0.921651 | -0.018232 | -0.001173 | -0.013572 |
| O | 2.757943  | 6.283259  | 4.105046 | -0.018229 | 0.001175  | -0.013575 |
| O | -0.304801 | 7.518342  | 2.261744 | 0.018273  | -0.001157 | 0.013583  |
| O | -0.175430 | 2.374756  | 0.744070 | -0.002410 | -0.001216 | -0.019167 |
| O | 2.628573  | 11.426844 | 5.622720 | 0.002411  | 0.001175  | 0.019197  |
| O | 4.783002  | 9.275557  | 2.439325 | 0.002423  | -0.001177 | 0.019199  |
| O | -2.329859 | 4.526044  | 3.927465 | -0.002417 | 0.001201  | -0.019192 |
| O | -1.223866 | 12.517207 | 2.155216 | 0.023951  | -0.017065 | -0.000255 |
| O | 3.677009  | 1.284394  | 4.211574 | -0.023993 | 0.017039  | 0.000255  |
| O | 5.831438  | 5.616407  | 1.028179 | -0.024017 | -0.017037 | 0.000250  |
| O | -3.378295 | 8.185194  | 5.338611 | 0.023940  | 0.017060  | -0.000257 |
| H | -0.637445 | 12.195109 | 2.878812 | -0.275951 | 0.047155  | 0.266709  |
| H | 3.090587  | 1.606491  | 3.487978 | 0.276266  | -0.047278 | -0.267033 |
| H | 5.245016  | 5.294309  | 0.304583 | 0.276526  | 0.047315  | -0.267279 |
| H | -2.791874 | 8.507292  | 6.062207 | -0.275878 | -0.047155 | 0.266640  |

65 f = 22.037936 THz 138.468434 2PiTHz 735.106389 cm-1 91.141609  
meV

|    | X         | Y         | Z        | dx        | dy        | dz        |
|----|-----------|-----------|----------|-----------|-----------|-----------|
| Li | 3.769818  | 9.645336  | 4.001386 | 0.002117  | -0.007543 | -0.014736 |
| Li | -1.316675 | 4.156264  | 2.365404 | 0.002834  | -0.007981 | -0.015619 |
| Li | -3.471104 | 2.744536  | 5.548798 | -0.002834 | -0.007974 | 0.015616  |
| Li | 5.924247  | 11.057064 | 0.817991 | -0.002117 | -0.007549 | 0.014740  |

|    |           |           |          |           |           |           |
|----|-----------|-----------|----------|-----------|-----------|-----------|
| Na | 2.049025  | 6.784862  | 1.629696 | -0.000148 | -0.000048 | 0.001046  |
| Na | 0.404117  | 7.016739  | 4.737094 | -0.000084 | -0.000056 | 0.001064  |
| Na | 2.558546  | 13.685662 | 1.553699 | 0.000084  | -0.000059 | -0.001064 |
| Na | -0.105403 | 0.115939  | 4.813091 | 0.000148  | -0.000046 | -0.001045 |
| B  | 4.155007  | 8.978944  | 1.168663 | 0.012496  | -0.001751 | 0.037399  |
| B  | -1.701865 | 4.822656  | 5.198127 | 0.012093  | -0.001881 | 0.038641  |
| B  | 0.452564  | 2.078144  | 2.014732 | -0.012113 | -0.001880 | -0.038641 |
| B  | 2.000578  | 11.723457 | 4.352058 | -0.012479 | -0.001754 | -0.037406 |
| B  | -2.733891 | 11.746082 | 5.839177 | -0.034251 | 0.008049  | -0.005511 |
| B  | 5.187034  | 2.055518  | 0.527613 | -0.035599 | 0.008541  | -0.005390 |
| B  | 3.032605  | 4.845282  | 3.711007 | 0.035585  | 0.008522  | 0.005389  |
| B  | -0.579463 | 8.956318  | 2.655782 | 0.034262  | 0.008067  | 0.005512  |
| B  | -0.983708 | 0.054306  | 1.827988 | 0.000760  | -0.001902 | -0.016255 |
| B  | 3.436850  | 13.747295 | 4.538802 | -0.000146 | -0.001526 | -0.014767 |
| B  | 5.591279  | 6.955106  | 1.355407 | 0.000143  | -0.001535 | 0.014775  |
| B  | -3.138137 | 6.846495  | 5.011383 | -0.000756 | -0.001891 | 0.016245  |
| Si | 0.631772  | 3.486686  | 4.508512 | -0.010283 | -0.002221 | 0.031487  |
| Si | 1.821370  | 10.314915 | 1.858278 | -0.010356 | -0.002330 | 0.030410  |
| Si | -0.333059 | 10.387486 | 5.041673 | 0.010349  | -0.002335 | -0.030414 |
| Si | 2.786201  | 3.414115  | 1.325117 | 0.010293  | -0.002215 | -0.031483 |
| O  | 0.061445  | 3.072947  | 3.041906 | -0.010172 | 0.010376  | -0.011951 |
| O  | 2.391697  | 10.728653 | 3.324884 | -0.009482 | 0.009841  | -0.011583 |
| O  | 4.546126  | 9.973747  | 0.141489 | 0.009478  | 0.009840  | 0.011578  |
| O  | -2.092984 | 3.827853  | 6.225301 | 0.010176  | 0.010378  | 0.011955  |
| O  | 2.197450  | 3.933608  | 4.519003 | 0.005018  | -0.001606 | 0.003842  |
| O  | 0.255692  | 9.867992  | 1.847787 | 0.004801  | -0.001753 | 0.003890  |
| O  | -1.898737 | 10.834409 | 5.031182 | -0.004796 | -0.001743 | -0.003886 |
| O  | 4.351879  | 2.967192  | 1.335608 | -0.005023 | -0.001615 | -0.003847 |
| O  | -0.212316 | 4.798696  | 5.055280 | -0.015973 | -0.006376 | -0.017794 |
| O  | 2.665458  | 9.002905  | 1.311510 | -0.015574 | -0.006115 | -0.017367 |
| O  | 0.511030  | 11.699496 | 4.494905 | 0.015561  | -0.006113 | 0.017366  |
| O  | 1.942113  | 2.102105  | 1.871885 | 0.015985  | -0.006380 | 0.017796  |
| O  | 0.525580  | 2.169271  | 5.472081 | 0.024866  | 0.009566  | 0.020930  |
| O  | 1.927562  | 11.632329 | 0.894709 | 0.024263  | 0.009541  | 0.020323  |
| O  | -0.226867 | 9.070071  | 4.078104 | -0.024260 | 0.009542  | -0.020314 |
| O  | 2.680009  | 4.731529  | 2.288686 | -0.024866 | 0.009562  | -0.020932 |

|   |           |           |          |           |           |           |
|---|-----------|-----------|----------|-----------|-----------|-----------|
| O | 0.058846  | 0.698526  | 2.444964 | 0.008733  | -0.048664 | 0.048204  |
| O | 2.394296  | 13.103075 | 3.921826 | 0.008067  | -0.046598 | 0.045351  |
| O | 4.548725  | 7.599326  | 0.738431 | -0.008057 | -0.046604 | -0.045349 |
| O | -2.095583 | 6.202275  | 5.628359 | -0.008745 | -0.048659 | -0.048207 |
| O | -2.459230 | 13.184059 | 5.445139 | -0.012776 | 0.006403  | -0.013382 |
| O | 4.912372  | 0.617542  | 0.921651 | -0.014371 | 0.005598  | -0.013855 |
| O | 2.757943  | 6.283259  | 4.105046 | 0.014384  | 0.005588  | 0.013866  |
| O | -0.304801 | 7.518342  | 2.261744 | 0.012763  | 0.006415  | 0.013372  |
| O | -0.175430 | 2.374756  | 0.744070 | -0.020204 | 0.026506  | -0.057232 |
| O | 2.628573  | 11.426844 | 5.622720 | -0.020650 | 0.024707  | -0.054491 |
| O | 4.783002  | 9.275557  | 2.439325 | 0.020658  | 0.024690  | 0.054495  |
| O | -2.329859 | 4.526044  | 3.927465 | 0.020192  | 0.026524  | 0.057222  |
| O | -1.223866 | 12.517207 | 2.155216 | 0.004875  | 0.006045  | 0.005412  |
| O | 3.677009  | 1.284394  | 4.211574 | 0.005417  | 0.005444  | 0.004999  |
| O | 5.831438  | 5.616407  | 1.028179 | -0.005416 | 0.005429  | -0.005003 |
| O | -3.378295 | 8.185194  | 5.338611 | -0.004878 | 0.006058  | -0.005407 |
| H | -0.637445 | 12.195109 | 2.878812 | 0.026659  | 0.044519  | 0.004060  |
| H | 3.090587  | 1.606491  | 3.487978 | 0.020218  | 0.044189  | 0.009335  |
| H | 5.245016  | 5.294309  | 0.304583 | -0.020217 | 0.044212  | -0.009356 |
| H | -2.791874 | 8.507292  | 6.062207 | -0.026658 | 0.044502  | -0.004045 |

66 f = 22.031121 THz 138.425616 2PiTHz 734.879074 cm-1 91.113426 meV

|    | X         | Y         | Z        | dx        | dy        | dz        |
|----|-----------|-----------|----------|-----------|-----------|-----------|
| Li | 3.769818  | 9.645336  | 4.001386 | -0.013859 | 0.008130  | 0.018239  |
| Li | -1.316675 | 4.156264  | 2.365404 | 0.013676  | -0.007724 | -0.017363 |
| Li | -3.471104 | 2.744536  | 5.548798 | -0.013684 | -0.007705 | 0.017412  |
| Li | 5.924247  | 11.057064 | 0.817991 | 0.013803  | 0.008129  | -0.018145 |
| Na | 2.049025  | 6.784862  | 1.629696 | -0.001226 | 0.000221  | -0.000587 |
| Na | 0.404117  | 7.016739  | 4.737094 | 0.001237  | -0.000231 | 0.000541  |
| Na | 2.558546  | 13.685662 | 1.553699 | -0.001231 | -0.000221 | -0.000545 |
| Na | -0.105403 | 0.115939  | 4.813091 | 0.001227  | 0.000230  | 0.000584  |
| B  | 4.155007  | 8.978944  | 1.168663 | 0.006963  | 0.002785  | -0.023315 |
| B  | -1.701865 | 4.822656  | 5.198127 | -0.007601 | -0.002685 | 0.021278  |
| B  | 0.452564  | 2.078144  | 2.014732 | 0.007575  | -0.002700 | -0.021339 |
| B  | 2.000578  | 11.723457 | 4.352058 | -0.006975 | 0.002754  | 0.023187  |



|    |           |           |          |           |           |           |
|----|-----------|-----------|----------|-----------|-----------|-----------|
| B  | -2.733891 | 11.746082 | 5.839177 | 0.025164  | -0.008513 | -0.001285 |
| B  | 5.187034  | 2.055518  | 0.527613 | -0.023402 | 0.008127  | 0.001505  |
| B  | 3.032605  | 4.845282  | 3.711007 | 0.023367  | 0.008091  | -0.001548 |
| B  | -0.579463 | 8.956318  | 2.655782 | -0.025214 | -0.008541 | 0.001231  |
| B  | -0.983708 | 0.054306  | 1.827988 | 0.017893  | -0.007265 | -0.028882 |
| B  | 3.436850  | 13.747295 | 4.538802 | -0.017886 | 0.007337  | 0.029617  |
| B  | 5.591279  | 6.955106  | 1.355407 | 0.017948  | 0.007361  | -0.029734 |
| B  | -3.138137 | 6.846495  | 5.011383 | -0.017895 | -0.007259 | 0.028858  |
| Si | 0.631772  | 3.486686  | 4.508512 | 0.002260  | 0.002237  | 0.019396  |
| Si | 1.821370  | 10.314915 | 1.858278 | -0.001729 | -0.002143 | -0.020910 |
| Si | -0.333059 | 10.387486 | 5.041673 | 0.001758  | -0.002101 | 0.020999  |
| Si | 2.786201  | 3.414115  | 1.325117 | -0.002245 | 0.002260  | -0.019347 |
| O  | 0.061445  | 3.072947  | 3.041906 | -0.012474 | 0.009884  | -0.006292 |
| O  | 2.391697  | 10.728653 | 3.324884 | 0.012959  | -0.010361 | 0.006902  |
| O  | 4.546126  | 9.973747  | 0.141489 | -0.013016 | -0.010414 | -0.006934 |
| O  | -2.092984 | 3.827853  | 6.225301 | 0.012448  | 0.009849  | 0.006284  |
| O  | 2.197450  | 3.933608  | 4.519003 | 0.003432  | 0.002703  | -0.001572 |
| O  | 0.255692  | 9.867992  | 1.847787 | -0.003659 | -0.002611 | 0.001334  |
| O  | -1.898737 | 10.834409 | 5.031182 | 0.003688  | -0.002628 | -0.001363 |
| O  | 4.351879  | 2.967192  | 1.335608 | -0.003421 | 0.002701  | 0.001555  |
| O  | -0.212316 | 4.798696  | 5.055280 | -0.006884 | -0.004370 | -0.007503 |
| O  | 2.665458  | 9.002905  | 1.311510 | 0.007687  | 0.004711  | 0.008416  |
| O  | 0.511030  | 11.699496 | 4.494905 | -0.007682 | 0.004674  | -0.008394 |
| O  | 1.942113  | 2.102105  | 1.871885 | 0.006900  | -0.004387 | 0.007516  |
| O  | 0.525580  | 2.169271  | 5.472081 | 0.010451  | 0.000114  | 0.010650  |
| O  | 1.927562  | 11.632329 | 0.894709 | -0.011664 | -0.000565 | -0.011679 |
| O  | -0.226867 | 9.070071  | 4.078104 | 0.011715  | -0.000611 | 0.011749  |
| O  | 2.680009  | 4.731529  | 2.288686 | -0.010416 | 0.000079  | -0.010618 |
| O  | 0.058846  | 0.698526  | 2.444964 | 0.013186  | -0.038883 | 0.054373  |
| O  | 2.394296  | 13.103075 | 3.921826 | -0.013581 | 0.041183  | -0.056613 |
| O  | 4.548725  | 7.599326  | 0.738431 | 0.013678  | 0.041416  | 0.056914  |
| O  | -2.095583 | 6.202275  | 5.628359 | -0.013134 | -0.038772 | -0.054247 |
| O  | -2.459230 | 13.184059 | 5.445139 | 0.032853  | 0.016530  | 0.009421  |
| O  | 4.912372  | 0.617542  | 0.921651 | -0.032254 | -0.016869 | -0.008750 |
| O  | 2.757943  | 6.283259  | 4.105046 | 0.032164  | -0.016820 | 0.008709  |
| O  | -0.304801 | 7.518342  | 2.261744 | -0.033063 | 0.016648  | -0.009477 |

|   |           |           |          |           |           |           |
|---|-----------|-----------|----------|-----------|-----------|-----------|
| O | -0.175430 | 2.374756  | 0.744070 | 0.011096  | 0.035539  | -0.051518 |
| O | 2.628573  | 11.426844 | 5.622720 | -0.010066 | -0.036763 | 0.054239  |
| O | 4.783002  | 9.275557  | 2.439325 | 0.010117  | -0.036977 | -0.054497 |
| O | -2.329859 | 4.526044  | 3.927465 | -0.011089 | 0.035460  | 0.051402  |
| O | -1.223866 | 12.517207 | 2.155216 | -0.009881 | 0.012250  | 0.007761  |
| O | 3.677009  | 1.284394  | 4.211574 | 0.009628  | -0.012506 | -0.008022 |
| O | 5.831438  | 5.616407  | 1.028179 | -0.009643 | -0.012597 | 0.008028  |
| O | -3.378295 | 8.185194  | 5.338611 | 0.009890  | 0.012213  | -0.007766 |
| H | -0.637445 | 12.195109 | 2.878812 | 0.116791  | 0.006604  | -0.095902 |
| H | 3.090587  | 1.606491  | 3.487978 | -0.117998 | -0.008815 | 0.095594  |
| H | 5.245016  | 5.294309  | 0.304583 | 0.118297  | -0.008883 | -0.095841 |
| H | -2.791874 | 8.507292  | 6.062207 | -0.116783 | 0.006595  | 0.095895  |

67 f = 21.939382 THz 137.849203 2PiTHz 731.818990 cm-1 90.734023 meV

|    | X         | Y         | Z        | dx        | dy        | dz        |
|----|-----------|-----------|----------|-----------|-----------|-----------|
| Li | 3.769818  | 9.645336  | 4.001386 | -0.014566 | 0.005659  | 0.015329  |
| Li | -1.316675 | 4.156264  | 2.365404 | 0.014633  | -0.005683 | -0.015443 |
| Li | -3.471104 | 2.744536  | 5.548798 | 0.014636  | 0.005686  | -0.015451 |
| Li | 5.924247  | 11.057064 | 0.817991 | -0.014601 | -0.005682 | 0.015368  |
| Na | 2.049025  | 6.784862  | 1.629696 | -0.001339 | -0.000130 | -0.000112 |
| Na | 0.404117  | 7.016739  | 4.737094 | 0.001339  | 0.000134  | 0.000128  |
| Na | 2.558546  | 13.685662 | 1.553699 | 0.001340  | -0.000133 | 0.000130  |
| Na | -0.105403 | 0.115939  | 4.813091 | -0.001342 | 0.000130  | -0.000114 |
| B  | 4.155007  | 8.978944  | 1.168663 | -0.000623 | 0.009392  | -0.024951 |
| B  | -1.701865 | 4.822656  | 5.198127 | 0.000628  | -0.009391 | 0.025093  |
| B  | 0.452564  | 2.078144  | 2.014732 | 0.000646  | 0.009398  | 0.025137  |
| B  | 2.000578  | 11.723457 | 4.352058 | -0.000592 | -0.009392 | -0.024978 |
| B  | -2.733891 | 11.746082 | 5.839177 | -0.009952 | -0.003029 | -0.003106 |
| B  | 5.187034  | 2.055518  | 0.527613 | 0.010052  | 0.002988  | 0.003178  |
| B  | 3.032605  | 4.845282  | 3.711007 | 0.009970  | -0.003003 | 0.003179  |
| B  | -0.579463 | 8.956318  | 2.655782 | -0.009951 | 0.003034  | -0.003114 |
| B  | -0.983708 | 0.054306  | 1.827988 | -0.021613 | 0.008694  | 0.033914  |
| B  | 3.436850  | 13.747295 | 4.538802 | 0.021592  | -0.008694 | -0.033827 |
| B  | 5.591279  | 6.955106  | 1.355407 | 0.021545  | 0.008681  | -0.033774 |
| B  | -3.138137 | 6.846495  | 5.011383 | -0.021602 | -0.008675 | 0.033871  |

|    |           |           |          |           |           |           |
|----|-----------|-----------|----------|-----------|-----------|-----------|
| Si | 0.631772  | 3.486686  | 4.508512 | -0.009147 | 0.008680  | -0.013938 |
| Si | 1.821370  | 10.314915 | 1.858278 | 0.009138  | -0.008619 | 0.013822  |
| Si | -0.333059 | 10.387486 | 5.041673 | 0.009110  | 0.008631  | 0.013805  |
| Si | 2.786201  | 3.414115  | 1.325117 | -0.009177 | -0.008677 | -0.013892 |
| O  | 0.061445  | 3.072947  | 3.041906 | 0.011510  | -0.008308 | 0.008931  |
| O  | 2.391697  | 10.728653 | 3.324884 | -0.011457 | 0.008248  | -0.008897 |
| O  | 4.546126  | 9.973747  | 0.141489 | -0.011433 | -0.008233 | -0.008891 |
| O  | -2.092984 | 3.827853  | 6.225301 | 0.011498  | 0.008291  | 0.008916  |
| O  | 2.197450  | 3.933608  | 4.519003 | -0.005594 | -0.006034 | 0.006592  |
| O  | 0.255692  | 9.867992  | 1.847787 | 0.005554  | 0.006035  | -0.006566 |
| O  | -1.898737 | 10.834409 | 5.031182 | 0.005558  | -0.006016 | -0.006554 |
| O  | 4.351879  | 2.967192  | 1.335608 | -0.005578 | 0.006044  | 0.006602  |
| O  | -0.212316 | 4.798696  | 5.055280 | 0.002205  | -0.009461 | -0.005147 |
| O  | 2.665458  | 9.002905  | 1.311510 | -0.002188 | 0.009418  | 0.005125  |
| O  | 0.511030  | 11.699496 | 4.494905 | -0.002194 | -0.009423 | 0.005127  |
| O  | 1.942113  | 2.102105  | 1.871885 | 0.002174  | 0.009474  | -0.005173 |
| O  | 0.525580  | 2.169271  | 5.472081 | -0.007031 | -0.006276 | -0.016616 |
| O  | 1.927562  | 11.632329 | 0.894709 | 0.006949  | 0.006208  | 0.016523  |
| O  | -0.226867 | 9.070071  | 4.078104 | 0.006951  | -0.006220 | 0.016513  |
| O  | 2.680009  | 4.731529  | 2.288686 | -0.006991 | 0.006260  | -0.016589 |
| O  | 0.058846  | 0.698526  | 2.444964 | -0.011400 | 0.043797  | -0.056852 |
| O  | 2.394296  | 13.103075 | 3.921826 | 0.011318  | -0.043534 | 0.056563  |
| O  | 4.548725  | 7.599326  | 0.738431 | 0.011280  | 0.043465  | 0.056447  |
| O  | -2.095583 | 6.202275  | 5.628359 | -0.011408 | -0.043745 | -0.056806 |
| O  | -2.459230 | 13.184059 | 5.445139 | -0.035215 | -0.017068 | -0.003629 |
| O  | 4.912372  | 0.617542  | 0.921651 | 0.035360  | 0.017115  | 0.003696  |
| O  | 2.757943  | 6.283259  | 4.105046 | 0.035370  | -0.017159 | 0.003687  |
| O  | -0.304801 | 7.518342  | 2.261744 | -0.035123 | 0.016989  | -0.003616 |
| O  | -0.175430 | 2.374756  | 0.744070 | -0.008653 | -0.042996 | 0.048681  |
| O  | 2.628573  | 11.426844 | 5.622720 | 0.008684  | 0.042811  | -0.048393 |
| O  | 4.783002  | 9.275557  | 2.439325 | 0.008613  | -0.042715 | -0.048292 |
| O  | -2.329859 | 4.526044  | 3.927465 | -0.008708 | 0.042991  | 0.048625  |
| O  | -1.223866 | 12.517207 | 2.155216 | 0.006576  | -0.019272 | -0.005809 |
| O  | 3.677009  | 1.284394  | 4.211574 | -0.006571 | 0.019211  | 0.005782  |
| O  | 5.831438  | 5.616407  | 1.028179 | -0.006542 | -0.019182 | 0.005776  |
| O  | -3.378295 | 8.185194  | 5.338611 | 0.006567  | 0.019267  | -0.005786 |

|   |           |           |          |           |           |           |
|---|-----------|-----------|----------|-----------|-----------|-----------|
| H | -0.637445 | 12.195109 | 2.878812 | -0.082816 | -0.027901 | 0.062205  |
| H | 3.090587  | 1.606491  | 3.487978 | 0.082403  | 0.027800  | -0.061914 |
| H | 5.245016  | 5.294309  | 0.304583 | 0.082202  | -0.027812 | -0.061719 |
| H | -2.791874 | 8.507292  | 6.062207 | -0.082610 | 0.027871  | 0.062067  |

68 f = 21.857900 THz 137.337239 2PiTHz 729.101058 cm-1 90.397043  
meV

|    | X         | Y         | Z        | dx        | dy        | dz        |
|----|-----------|-----------|----------|-----------|-----------|-----------|
| Li | 3.769818  | 9.645336  | 4.001386 | 0.009519  | -0.000631 | -0.017771 |
| Li | -1.316675 | 4.156264  | 2.365404 | 0.009501  | -0.000639 | -0.017720 |
| Li | -3.471104 | 2.744536  | 5.548798 | 0.009426  | 0.000586  | -0.017651 |
| Li | 5.924247  | 11.057064 | 0.817991 | 0.009577  | 0.000671  | -0.017809 |
| Na | 2.049025  | 6.784862  | 1.629696 | -0.000516 | 0.001183  | 0.000744  |
| Na | 0.404117  | 7.016739  | 4.737094 | -0.000519 | 0.001183  | 0.000728  |
| Na | 2.558546  | 13.685662 | 1.553699 | -0.000524 | -0.001183 | 0.000726  |
| Na | -0.105403 | 0.115939  | 4.813091 | -0.000511 | -0.001180 | 0.000745  |
| B  | 4.155007  | 8.978944  | 1.168663 | 0.007761  | -0.006992 | 0.027738  |
| B  | -1.701865 | 4.822656  | 5.198127 | 0.007713  | -0.006897 | 0.027758  |
| B  | 0.452564  | 2.078144  | 2.014732 | 0.007783  | 0.006940  | 0.027667  |
| B  | 2.000578  | 11.723457 | 4.352058 | 0.007712  | 0.006965  | 0.027865  |
| B  | -2.733891 | 11.746082 | 5.839177 | 0.014016  | -0.002427 | 0.011913  |
| B  | 5.187034  | 2.055518  | 0.527613 | 0.013940  | -0.002404 | 0.011953  |
| B  | 3.032605  | 4.845282  | 3.711007 | 0.014011  | 0.002478  | 0.011911  |
| B  | -0.579463 | 8.956318  | 2.655782 | 0.013893  | 0.002342  | 0.011976  |
| B  | -0.983708 | 0.054306  | 1.827988 | -0.006698 | 0.001207  | 0.016824  |
| B  | 3.436850  | 13.747295 | 4.538802 | -0.006918 | 0.001293  | 0.017153  |
| B  | 5.591279  | 6.955106  | 1.355407 | -0.006859 | -0.001260 | 0.017043  |
| B  | -3.138137 | 6.846495  | 5.011383 | -0.006776 | -0.001232 | 0.016931  |
| Si | 0.631772  | 3.486686  | 4.508512 | -0.008367 | 0.009834  | -0.019020 |
| Si | 1.821370  | 10.314915 | 1.858278 | -0.008386 | 0.009866  | -0.019138 |
| Si | -0.333059 | 10.387486 | 5.041673 | -0.008401 | -0.009865 | -0.019066 |
| Si | 2.786201  | 3.414115  | 1.325117 | -0.008386 | -0.009838 | -0.019068 |
| O  | 0.061445  | 3.072947  | 3.041906 | 0.011781  | -0.011062 | 0.006450  |
| O  | 2.391697  | 10.728653 | 3.324884 | 0.011889  | -0.011117 | 0.006548  |
| O  | 4.546126  | 9.973747  | 0.141489 | 0.011833  | 0.011097  | 0.006501  |
| O  | -2.092984 | 3.827853  | 6.225301 | 0.011831  | 0.011079  | 0.006494  |

|   |           |           |          |           |           |           |
|---|-----------|-----------|----------|-----------|-----------|-----------|
| O | 2.197450  | 3.933608  | 4.519003 | -0.005869 | -0.002308 | 0.006702  |
| O | 0.255692  | 9.867992  | 1.847787 | -0.005950 | -0.002341 | 0.006705  |
| O | -1.898737 | 10.834409 | 5.031182 | -0.005904 | 0.002345  | 0.006739  |
| O | 4.351879  | 2.967192  | 1.335608 | -0.005887 | 0.002318  | 0.006679  |
| O | -0.212316 | 4.798696  | 5.055280 | -0.001056 | -0.009582 | -0.006433 |
| O | 2.665458  | 9.002905  | 1.311510 | -0.001010 | -0.009609 | -0.006427 |
| O | 0.511030  | 11.699496 | 4.494905 | -0.001045 | 0.009621  | -0.006456 |
| O | 1.942113  | 2.102105  | 1.871885 | -0.001066 | 0.009581  | -0.006420 |
| O | 0.525580  | 2.169271  | 5.472081 | -0.011947 | -0.011169 | -0.016114 |
| O | 1.927562  | 11.632329 | 0.894709 | -0.012000 | -0.011180 | -0.016279 |
| O | -0.226867 | 9.070071  | 4.078104 | -0.011948 | 0.011183  | -0.016209 |
| O | 2.680009  | 4.731529  | 2.288686 | -0.011976 | 0.011163  | -0.016180 |
| O | 0.058846  | 0.698526  | 2.444964 | -0.017093 | 0.047150  | -0.054864 |
| O | 2.394296  | 13.103075 | 3.921826 | -0.017214 | 0.047502  | -0.055387 |
| O | 4.548725  | 7.599326  | 0.738431 | -0.017176 | -0.047381 | -0.055200 |
| O | -2.095583 | 6.202275  | 5.628359 | -0.017168 | -0.047278 | -0.055091 |
| O | -2.459230 | 13.184059 | 5.445139 | 0.033029  | 0.016969  | 0.011502  |
| O | 4.912372  | 0.617542  | 0.921651 | 0.032671  | 0.016759  | 0.011455  |
| O | 2.757943  | 6.283259  | 4.105046 | 0.032822  | -0.016861 | 0.011503  |
| O | -0.304801 | 7.518342  | 2.261744 | 0.032949  | -0.016952 | 0.011458  |
| O | -0.175430 | 2.374756  | 0.744070 | -0.003975 | -0.040559 | 0.054196  |
| O | 2.628573  | 11.426844 | 5.622720 | -0.004152 | -0.040948 | 0.054603  |
| O | 4.783002  | 9.275557  | 2.439325 | -0.004150 | 0.040856  | 0.054436  |
| O | -2.329859 | 4.526044  | 3.927465 | -0.004057 | 0.040705  | 0.054379  |
| O | -1.223866 | 12.517207 | 2.155216 | 0.000804  | -0.015232 | -0.002570 |
| O | 3.677009  | 1.284394  | 4.211574 | 0.000906  | -0.015398 | -0.002636 |
| O | 5.831438  | 5.616407  | 1.028179 | 0.000858  | 0.015378  | -0.002597 |
| O | -3.378295 | 8.185194  | 5.338611 | 0.000868  | 0.015274  | -0.002595 |
| H | -0.637445 | 12.195109 | 2.878812 | -0.065822 | -0.016296 | 0.049913  |
| H | 3.090587  | 1.606491  | 3.487978 | -0.066919 | -0.016393 | 0.050842  |
| H | 5.245016  | 5.294309  | 0.304583 | -0.066389 | 0.016406  | 0.050405  |
| H | -2.791874 | 8.507292  | 6.062207 | -0.066442 | 0.016237  | 0.050477  |

69 f = 21.571011 THz 135.534661 2PiTHz 719.531463 cm-1 89.210564  
meV

X Y Z dx dy dz

|    |           |           |          |           |           |           |
|----|-----------|-----------|----------|-----------|-----------|-----------|
| Li | 3.769818  | 9.645336  | 4.001386 | 0.013439  | -0.009793 | -0.017221 |
| Li | -1.316675 | 4.156264  | 2.365404 | 0.013364  | -0.009805 | -0.017081 |
| Li | -3.471104 | 2.744536  | 5.548798 | -0.013365 | -0.009785 | 0.017075  |
| Li | 5.924247  | 11.057064 | 0.817991 | -0.013438 | -0.009794 | 0.017232  |
| Na | 2.049025  | 6.784862  | 1.629696 | -0.000233 | 0.001393  | 0.000503  |
| Na | 0.404117  | 7.016739  | 4.737094 | -0.000234 | 0.001389  | 0.000513  |
| Na | 2.558546  | 13.685662 | 1.553699 | 0.000237  | 0.001392  | -0.000513 |
| Na | -0.105403 | 0.115939  | 4.813091 | 0.000232  | 0.001387  | -0.000502 |
| B  | 4.155007  | 8.978944  | 1.168663 | -0.012485 | 0.007514  | -0.019727 |
| B  | -1.701865 | 4.822656  | 5.198127 | -0.012380 | 0.007514  | -0.019414 |
| B  | 0.452564  | 2.078144  | 2.014732 | 0.012251  | 0.007478  | 0.019219  |
| B  | 2.000578  | 11.723457 | 4.352058 | 0.012540  | 0.007530  | 0.019804  |
| B  | -2.733891 | 11.746082 | 5.839177 | 0.029405  | -0.004074 | -0.013071 |
| B  | 5.187034  | 2.055518  | 0.527613 | 0.028696  | -0.003999 | -0.012832 |
| B  | 3.032605  | 4.845282  | 3.711007 | -0.028907 | -0.004037 | 0.012846  |
| B  | -0.579463 | 8.956318  | 2.655782 | -0.029336 | -0.004071 | 0.013039  |
| B  | -0.983708 | 0.054306  | 1.827988 | 0.015502  | 0.001555  | -0.006115 |
| B  | 3.436850  | 13.747295 | 4.538802 | 0.015739  | 0.001597  | -0.006190 |
| B  | 5.591279  | 6.955106  | 1.355407 | -0.015730 | 0.001586  | 0.006205  |
| B  | -3.138137 | 6.846495  | 5.011383 | -0.015539 | 0.001577  | 0.006083  |
| Si | 0.631772  | 3.486686  | 4.508512 | 0.021537  | -0.000679 | -0.012216 |
| Si | 1.821370  | 10.314915 | 1.858278 | 0.021705  | -0.000658 | -0.012588 |
| Si | -0.333059 | 10.387486 | 5.041673 | -0.021781 | -0.000694 | 0.012564  |
| Si | 2.786201  | 3.414115  | 1.325117 | -0.021366 | -0.000586 | 0.012311  |
| O  | 0.061445  | 3.072947  | 3.041906 | 0.004309  | -0.001047 | 0.001519  |
| O  | 2.391697  | 10.728653 | 3.324884 | 0.004513  | -0.001180 | 0.001586  |
| O  | 4.546126  | 9.973747  | 0.141489 | -0.004478 | -0.001151 | -0.001576 |
| O  | -2.092984 | 3.827853  | 6.225301 | -0.004394 | -0.001131 | -0.001523 |
| O  | 2.197450  | 3.933608  | 4.519003 | -0.017320 | 0.009510  | -0.005907 |
| O  | 0.255692  | 9.867992  | 1.847787 | -0.017545 | 0.009552  | -0.005924 |
| O  | -1.898737 | 10.834409 | 5.031182 | 0.017566  | 0.009594  | 0.005966  |
| O  | 4.351879  | 2.967192  | 1.335608 | 0.017278  | 0.009430  | 0.005806  |
| O  | -0.212316 | 4.798696  | 5.055280 | 0.027392  | 0.004416  | 0.008717  |
| O  | 2.665458  | 9.002905  | 1.311510 | 0.027701  | 0.004503  | 0.008868  |
| O  | 0.511030  | 11.699496 | 4.494905 | -0.027739 | 0.004548  | -0.008890 |
| O  | 1.942113  | 2.102105  | 1.871885 | -0.027282 | 0.004317  | -0.008663 |

|   |           |           |          |           |           |           |
|---|-----------|-----------|----------|-----------|-----------|-----------|
| O | 0.525580  | 2.169271  | 5.472081 | -0.011994 | -0.000051 | -0.000479 |
| O | 1.927562  | 11.632329 | 0.894709 | -0.012310 | -0.000156 | -0.000667 |
| O | -0.226867 | 9.070071  | 4.078104 | 0.012288  | -0.000123 | 0.000622  |
| O | 2.680009  | 4.731529  | 2.288686 | 0.012073  | -0.000149 | 0.000574  |
| O | 0.058846  | 0.698526  | 2.444964 | 0.023278  | -0.009338 | 0.030364  |
| O | 2.394296  | 13.103075 | 3.921826 | 0.023497  | -0.009119 | 0.030413  |
| O | 4.548725  | 7.599326  | 0.738431 | -0.023471 | -0.009175 | -0.030427 |
| O | -2.095583 | 6.202275  | 5.628359 | -0.023316 | -0.009180 | -0.030292 |
| O | -2.459230 | 13.184059 | 5.445139 | -0.049271 | -0.054672 | -0.001334 |
| O | 4.912372  | 0.617542  | 0.921651 | -0.048634 | -0.053930 | -0.001413 |
| O | 2.757943  | 6.283259  | 4.105046 | 0.048761  | -0.054129 | 0.001394  |
| O | -0.304801 | 7.518342  | 2.261744 | 0.049213  | -0.054598 | 0.001332  |
| O | -0.175430 | 2.374756  | 0.744070 | 0.049806  | 0.036597  | -0.016981 |
| O | 2.628573  | 11.426844 | 5.622720 | 0.050629  | 0.036923  | -0.016721 |
| O | 4.783002  | 9.275557  | 2.439325 | -0.050539 | 0.036900  | 0.016766  |
| O | -2.329859 | 4.526044  | 3.927465 | -0.050043 | 0.036630  | 0.016827  |
| O | -1.223866 | 12.517207 | 2.155216 | -0.008082 | 0.015080  | -0.007138 |
| O | 3.677009  | 1.284394  | 4.211574 | -0.007998 | 0.015239  | -0.007238 |
| O | 5.831438  | 5.616407  | 1.028179 | 0.007997  | 0.015222  | 0.007235  |
| O | -3.378295 | 8.185194  | 5.338611 | 0.008084  | 0.015111  | 0.007177  |
| H | -0.637445 | 12.195109 | 2.878812 | 0.016294  | -0.016476 | -0.039522 |
| H | 3.090587  | 1.606491  | 3.487978 | 0.014086  | -0.016401 | -0.037902 |
| H | 5.245016  | 5.294309  | 0.304583 | -0.014147 | -0.016262 | 0.037861  |
| H | -2.791874 | 8.507292  | 6.062207 | -0.015869 | -0.016617 | 0.039313  |

70 f = 21.480656 THz 134.966942 2PiTHz 716.517537 cm-1 88.836884 meV

|    | X         | Y         | Z        | dx        | dy        | dz        |
|----|-----------|-----------|----------|-----------|-----------|-----------|
| Li | 3.769818  | 9.645336  | 4.001386 | -0.006021 | 0.007818  | 0.006921  |
| Li | -1.316675 | 4.156264  | 2.365404 | -0.006025 | 0.007822  | 0.006859  |
| Li | -3.471104 | 2.744536  | 5.548798 | -0.006014 | -0.007819 | 0.006855  |
| Li | 5.924247  | 11.057064 | 0.817991 | -0.006072 | -0.007851 | 0.006973  |
| Na | 2.049025  | 6.784862  | 1.629696 | -0.000550 | -0.001465 | -0.000773 |
| Na | 0.404117  | 7.016739  | 4.737094 | -0.000545 | -0.001477 | -0.000770 |
| Na | 2.558546  | 13.685662 | 1.553699 | -0.000542 | 0.001480  | -0.000774 |
| Na | -0.105403 | 0.115939  | 4.813091 | -0.000552 | 0.001466  | -0.000771 |

|    |           |           |          |           |           |           |
|----|-----------|-----------|----------|-----------|-----------|-----------|
| B  | 4.155007  | 8.978944  | 1.168663 | 0.021864  | -0.003404 | 0.024848  |
| B  | -1.701865 | 4.822656  | 5.198127 | 0.021721  | -0.003411 | 0.024622  |
| B  | 0.452564  | 2.078144  | 2.014732 | 0.021693  | 0.003399  | 0.024595  |
| B  | 2.000578  | 11.723457 | 4.352058 | 0.021924  | 0.003440  | 0.024932  |
| B  | -2.733891 | 11.746082 | 5.839177 | 0.037205  | -0.008393 | -0.000886 |
| B  | 5.187034  | 2.055518  | 0.527613 | 0.036764  | -0.008383 | -0.000816 |
| B  | 3.032605  | 4.845282  | 3.711007 | 0.036817  | 0.008344  | -0.000823 |
| B  | -0.579463 | 8.956318  | 2.655782 | 0.037074  | 0.008427  | -0.000839 |
| B  | -0.983708 | 0.054306  | 1.827988 | 0.016542  | 0.002197  | -0.004307 |
| B  | 3.436850  | 13.747295 | 4.538802 | 0.016778  | 0.002162  | -0.004477 |
| B  | 5.591279  | 6.955106  | 1.355407 | 0.016691  | -0.002173 | -0.004410 |
| B  | -3.138137 | 6.846495  | 5.011383 | 0.016579  | -0.002182 | -0.004356 |
| Si | 0.631772  | 3.486686  | 4.508512 | -0.028686 | 0.013673  | -0.014499 |
| Si | 1.821370  | 10.314915 | 1.858278 | -0.028899 | 0.013785  | -0.014667 |
| Si | -0.333059 | 10.387486 | 5.041673 | -0.028974 | -0.013800 | -0.014601 |
| Si | 2.786201  | 3.414115  | 1.325117 | -0.028674 | -0.013663 | -0.014530 |
| O  | 0.061445  | 3.072947  | 3.041906 | 0.011990  | -0.014272 | -0.003579 |
| O  | 2.391697  | 10.728653 | 3.324884 | 0.012124  | -0.014387 | -0.003594 |
| O  | 4.546126  | 9.973747  | 0.141489 | 0.012095  | 0.014369  | -0.003594 |
| O  | -2.092984 | 3.827853  | 6.225301 | 0.012005  | 0.014288  | -0.003585 |
| O  | 2.197450  | 3.933608  | 4.519003 | 0.010614  | -0.013104 | 0.016301  |
| O  | 0.255692  | 9.867992  | 1.847787 | 0.010663  | -0.013200 | 0.016413  |
| O  | -1.898737 | 10.834409 | 5.031182 | 0.010729  | 0.013221  | 0.016424  |
| O  | 4.351879  | 2.967192  | 1.335608 | 0.010602  | 0.013109  | 0.016304  |
| O  | -0.212316 | 4.798696  | 5.055280 | -0.022711 | -0.014595 | -0.007419 |
| O  | 2.665458  | 9.002905  | 1.311510 | -0.022833 | -0.014730 | -0.007469 |
| O  | 0.511030  | 11.699496 | 4.494905 | -0.022953 | 0.014764  | -0.007511 |
| O  | 1.942113  | 2.102105  | 1.871885 | -0.022671 | 0.014568  | -0.007400 |
| O  | 0.525580  | 2.169271  | 5.472081 | -0.011705 | -0.016336 | -0.010076 |
| O  | 1.927562  | 11.632329 | 0.894709 | -0.011865 | -0.016480 | -0.010185 |
| O  | -0.226867 | 9.070071  | 4.078104 | -0.011812 | 0.016477  | -0.010181 |
| O  | 2.680009  | 4.731529  | 2.288686 | -0.011726 | 0.016342  | -0.010079 |
| O  | 0.058846  | 0.698526  | 2.444964 | 0.014956  | 0.011356  | 0.011669  |
| O  | 2.394296  | 13.103075 | 3.921826 | 0.015059  | 0.011491  | 0.011769  |
| O  | 4.548725  | 7.599326  | 0.738431 | 0.014990  | -0.011495 | 0.011674  |
| O  | -2.095583 | 6.202275  | 5.628359 | 0.014952  | -0.011382 | 0.011670  |



|   |           |           |          |           |           |           |
|---|-----------|-----------|----------|-----------|-----------|-----------|
| O | -2.459230 | 13.184059 | 5.445139 | -0.041920 | -0.052688 | 0.003211  |
| O | 4.912372  | 0.617542  | 0.921651 | -0.041471 | -0.052192 | 0.003146  |
| O | 2.757943  | 6.283259  | 4.105046 | -0.041511 | 0.052216  | 0.003157  |
| O | -0.304801 | 7.518342  | 2.261744 | -0.041740 | 0.052514  | 0.003200  |
| O | -0.175430 | 2.374756  | 0.744070 | 0.049919  | 0.025154  | 0.007875  |
| O | 2.628573  | 11.426844 | 5.622720 | 0.050482  | 0.025385  | 0.008003  |
| O | 4.783002  | 9.275557  | 2.439325 | 0.050300  | -0.025275 | 0.008020  |
| O | -2.329859 | 4.526044  | 3.927465 | 0.049962  | -0.025157 | 0.007907  |
| O | -1.223866 | 12.517207 | 2.155216 | -0.002559 | 0.011281  | -0.011336 |
| O | 3.677009  | 1.284394  | 4.211574 | -0.002593 | 0.011398  | -0.011364 |
| O | 5.831438  | 5.616407  | 1.028179 | -0.002574 | -0.011356 | -0.011346 |
| O | -3.378295 | 8.185194  | 5.338611 | -0.002556 | -0.011284 | -0.011329 |
| H | -0.637445 | 12.195109 | 2.878812 | -0.094423 | 0.005694  | 0.060840  |
| H | 3.090587  | 1.606491  | 3.487978 | -0.095068 | 0.005520  | 0.061126  |
| H | 5.245016  | 5.294309  | 0.304583 | -0.094856 | -0.005540 | 0.061022  |
| H | -2.791874 | 8.507292  | 6.062207 | -0.094643 | -0.005717 | 0.061025  |

71 f = 21.457529 THz 134.821629 2PiTHz 715.746094 cm-1 88.741238 meV

|    | X         | Y         | Z        | dx        | dy        | dz        |
|----|-----------|-----------|----------|-----------|-----------|-----------|
| Li | 3.769818  | 9.645336  | 4.001386 | 0.007264  | -0.001414 | -0.011418 |
| Li | -1.316675 | 4.156264  | 2.365404 | -0.007439 | 0.001554  | 0.011659  |
| Li | -3.471104 | 2.744536  | 5.548798 | 0.007448  | 0.001556  | -0.011668 |
| Li | 5.924247  | 11.057064 | 0.817991 | -0.007252 | -0.001413 | 0.011397  |
| Na | 2.049025  | 6.784862  | 1.629696 | 0.000493  | -0.000124 | -0.001312 |
| Na | 0.404117  | 7.016739  | 4.737094 | -0.000490 | 0.000111  | 0.001313  |
| Na | 2.558546  | 13.685662 | 1.553699 | 0.000490  | 0.000103  | -0.001312 |
| Na | -0.105403 | 0.115939  | 4.813091 | -0.000493 | -0.000131 | 0.001313  |
| B  | 4.155007  | 8.978944  | 1.168663 | -0.014236 | 0.003103  | -0.031206 |
| B  | -1.701865 | 4.822656  | 5.198127 | 0.014326  | -0.003175 | 0.031344  |
| B  | 0.452564  | 2.078144  | 2.014732 | -0.014352 | -0.003179 | -0.031369 |
| B  | 2.000578  | 11.723457 | 4.352058 | 0.014175  | 0.003092  | 0.031115  |
| B  | -2.733891 | 11.746082 | 5.839177 | 0.041025  | -0.002334 | -0.015950 |
| B  | 5.187034  | 2.055518  | 0.527613 | -0.041432 | 0.002441  | 0.016143  |
| B  | 3.032605  | 4.845282  | 3.711007 | 0.041388  | 0.002422  | -0.016145 |
| B  | -0.579463 | 8.956318  | 2.655782 | -0.041150 | -0.002369 | 0.015953  |

|    |           |           |          |           |           |           |
|----|-----------|-----------|----------|-----------|-----------|-----------|
| B  | -0.983708 | 0.054306  | 1.827988 | -0.019212 | -0.000463 | 0.011226  |
| B  | 3.436850  | 13.747295 | 4.538802 | 0.018959  | 0.000446  | -0.011103 |
| B  | 5.591279  | 6.955106  | 1.355407 | -0.019006 | 0.000449  | 0.011115  |
| B  | -3.138137 | 6.846495  | 5.011383 | 0.019186  | -0.000463 | -0.011215 |
| Si | 0.631772  | 3.486686  | 4.508512 | -0.020690 | 0.003354  | 0.022167  |
| Si | 1.821370  | 10.314915 | 1.858278 | 0.020478  | -0.003382 | -0.022016 |
| Si | -0.333059 | 10.387486 | 5.041673 | -0.020388 | -0.003336 | 0.022069  |
| Si | 2.786201  | 3.414115  | 1.325117 | 0.020724  | 0.003368  | -0.022146 |
| O  | 0.061445  | 3.072947  | 3.041906 | -0.011142 | 0.006471  | -0.003310 |
| O  | 2.391697  | 10.728653 | 3.324884 | 0.011107  | -0.006462 | 0.003307  |
| O  | 4.546126  | 9.973747  | 0.141489 | -0.011139 | -0.006502 | -0.003301 |
| O  | -2.092984 | 3.827853  | 6.225301 | 0.011137  | 0.006458  | 0.003311  |
| O  | 2.197450  | 3.933608  | 4.519003 | 0.018873  | -0.007408 | 0.005235  |
| O  | 0.255692  | 9.867992  | 1.847787 | -0.018677 | 0.007313  | -0.005210 |
| O  | -1.898737 | 10.834409 | 5.031182 | 0.018642  | 0.007265  | 0.005146  |
| O  | 4.351879  | 2.967192  | 1.335608 | -0.018888 | -0.007424 | -0.005265 |
| O  | -0.212316 | 4.798696  | 5.055280 | -0.031053 | -0.011634 | -0.013455 |
| O  | 2.665458  | 9.002905  | 1.311510 | 0.030764  | 0.011623  | 0.013390  |
| O  | 0.511030  | 11.699496 | 4.494905 | -0.030699 | 0.011581  | -0.013360 |
| O  | 1.942113  | 2.102105  | 1.871885 | 0.031072  | -0.011642 | 0.013469  |
| O  | 0.525580  | 2.169271  | 5.472081 | 0.018576  | 0.001808  | 0.006992  |
| O  | 1.927562  | 11.632329 | 0.894709 | -0.018422 | -0.001784 | -0.006985 |
| O  | -0.226867 | 9.070071  | 4.078104 | 0.018464  | -0.001846 | 0.007029  |
| O  | 2.680009  | 4.731529  | 2.288686 | -0.018563 | 0.001778  | -0.006971 |
| O  | 0.058846  | 0.698526  | 2.444964 | -0.014284 | -0.005928 | -0.011385 |
| O  | 2.394296  | 13.103075 | 3.921826 | 0.013918  | 0.006105  | 0.010860  |
| O  | 4.548725  | 7.599326  | 0.738431 | -0.013955 | 0.006162  | -0.010869 |
| O  | -2.095583 | 6.202275  | 5.628359 | 0.014258  | -0.005911 | 0.011360  |
| O  | -2.459230 | 13.184059 | 5.445139 | -0.043005 | -0.045486 | 0.005508  |
| O  | 4.912372  | 0.617542  | 0.921651 | 0.043786  | 0.046319  | -0.005473 |
| O  | 2.757943  | 6.283259  | 4.105046 | -0.043719 | 0.046258  | 0.005472  |
| O  | -0.304801 | 7.518342  | 2.261744 | 0.043129  | -0.045638 | -0.005513 |
| O  | -0.175430 | 2.374756  | 0.744070 | -0.048204 | -0.024424 | -0.007141 |
| O  | 2.628573  | 11.426844 | 5.622720 | 0.047458  | 0.023829  | 0.007427  |
| O  | 4.783002  | 9.275557  | 2.439325 | -0.047608 | 0.023888  | -0.007479 |
| O  | -2.329859 | 4.526044  | 3.927465 | 0.048143  | -0.024388 | 0.007124  |

|   |           |           |          |           |           |           |
|---|-----------|-----------|----------|-----------|-----------|-----------|
| O | -1.223866 | 12.517207 | 2.155216 | -0.004104 | -0.010745 | 0.005687  |
| O | 3.677009  | 1.284394  | 4.211574 | 0.004215  | 0.010492  | -0.005579 |
| O | 5.831438  | 5.616407  | 1.028179 | -0.004216 | 0.010531  | 0.005610  |
| O | -3.378295 | 8.185194  | 5.338611 | 0.004101  | -0.010726 | -0.005665 |
| H | -0.637445 | 12.195109 | 2.878812 | 0.131346  | -0.013309 | -0.099386 |
| H | 3.090587  | 1.606491  | 3.487978 | -0.131478 | 0.013473  | 0.099854  |
| H | 5.245016  | 5.294309  | 0.304583 | 0.131794  | 0.013454  | -0.100054 |
| H | -2.791874 | 8.507292  | 6.062207 | -0.131151 | -0.013282 | 0.099234  |

72 f = 21.358965 THz 134.202333 2PiTHz 712.458350 cm-1 88.333609 meV

|    | X         | Y         | Z        | dx        | dy        | dz        |
|----|-----------|-----------|----------|-----------|-----------|-----------|
| Li | 3.769818  | 9.645336  | 4.001386 | 0.003723  | -0.000824 | -0.008756 |
| Li | -1.316675 | 4.156264  | 2.365404 | -0.003743 | 0.000858  | 0.008762  |
| Li | -3.471104 | 2.744536  | 5.548798 | -0.003795 | -0.000897 | 0.008834  |
| Li | 5.924247  | 11.057064 | 0.817991 | 0.003686  | 0.000792  | -0.008711 |
| Na | 2.049025  | 6.784862  | 1.629696 | 0.001013  | -0.001382 | -0.000149 |
| Na | 0.404117  | 7.016739  | 4.737094 | -0.001020 | 0.001373  | 0.000154  |
| Na | 2.558546  | 13.685662 | 1.553699 | -0.001020 | -0.001369 | 0.000153  |
| Na | -0.105403 | 0.115939  | 4.813091 | 0.001015  | 0.001386  | -0.000152 |
| B  | 4.155007  | 8.978944  | 1.168663 | -0.021947 | 0.004910  | -0.033118 |
| B  | -1.701865 | 4.822656  | 5.198127 | 0.022077  | -0.004923 | 0.033247  |
| B  | 0.452564  | 2.078144  | 2.014732 | 0.022123  | 0.004946  | 0.033336  |
| B  | 2.000578  | 11.723457 | 4.352058 | -0.021923 | -0.004895 | -0.033080 |
| B  | -2.733891 | 11.746082 | 5.839177 | -0.037977 | 0.003504  | 0.005796  |
| B  | 5.187034  | 2.055518  | 0.527613 | 0.038336  | -0.003589 | -0.005863 |
| B  | 3.032605  | 4.845282  | 3.711007 | 0.038222  | 0.003565  | -0.005802 |
| B  | -0.579463 | 8.956318  | 2.655782 | -0.038031 | -0.003527 | 0.005823  |
| B  | -0.983708 | 0.054306  | 1.827988 | 0.020503  | -0.001460 | -0.009472 |
| B  | 3.436850  | 13.747295 | 4.538802 | -0.020280 | 0.001481  | 0.009366  |
| B  | 5.591279  | 6.955106  | 1.355407 | -0.020309 | -0.001473 | 0.009379  |
| B  | -3.138137 | 6.846495  | 5.011383 | 0.020422  | 0.001462  | -0.009423 |
| Si | 0.631772  | 3.486686  | 4.508512 | -0.031842 | 0.016436  | -0.014424 |
| Si | 1.821370  | 10.314915 | 1.858278 | 0.031676  | -0.016330 | 0.014286  |
| Si | -0.333059 | 10.387486 | 5.041673 | 0.031627  | 0.016333  | 0.014305  |
| Si | 2.786201  | 3.414115  | 1.325117 | -0.031926 | -0.016443 | -0.014373 |

|   |           |           |          |           |           |           |
|---|-----------|-----------|----------|-----------|-----------|-----------|
| O | 0.061445  | 3.072947  | 3.041906 | 0.014021  | -0.013976 | -0.000890 |
| O | 2.391697  | 10.728653 | 3.324884 | -0.013910 | 0.013861  | 0.000866  |
| O | 4.546126  | 9.973747  | 0.141489 | -0.013918 | -0.013857 | 0.000866  |
| O | -2.092984 | 3.827853  | 6.225301 | 0.013994  | 0.013973  | -0.000897 |
| O | 2.197450  | 3.933608  | 4.519003 | 0.010684  | -0.015449 | 0.016980  |
| O | 0.255692  | 9.867992  | 1.847787 | -0.010648 | 0.015365  | -0.016866 |
| O | -1.898737 | 10.834409 | 5.031182 | -0.010608 | -0.015338 | -0.016854 |
| O | 4.351879  | 2.967192  | 1.335608 | 0.010762  | 0.015486  | 0.017002  |
| O | -0.212316 | 4.798696  | 5.055280 | -0.022161 | -0.018730 | -0.008891 |
| O | 2.665458  | 9.002905  | 1.311510 | 0.022080  | 0.018635  | 0.008861  |
| O | 0.511030  | 11.699496 | 4.494905 | 0.022010  | -0.018626 | 0.008843  |
| O | 1.942113  | 2.102105  | 1.871885 | -0.022283 | 0.018753  | -0.008926 |
| O | 0.525580  | 2.169271  | 5.472081 | -0.013194 | -0.016794 | -0.014749 |
| O | 1.927562  | 11.632329 | 0.894709 | 0.013074  | 0.016676  | 0.014676  |
| O | -0.226867 | 9.070071  | 4.078104 | 0.013096  | -0.016673 | 0.014668  |
| O | 2.680009  | 4.731529  | 2.288686 | -0.013146 | 0.016798  | -0.014748 |
| O | 0.058846  | 0.698526  | 2.444964 | 0.010647  | 0.016907  | 0.005850  |
| O | 2.394296  | 13.103075 | 3.921826 | -0.010418 | -0.016917 | -0.005561 |
| O | 4.548725  | 7.599326  | 0.738431 | -0.010480 | 0.016871  | -0.005651 |
| O | -2.095583 | 6.202275  | 5.628359 | 0.010551  | -0.016957 | 0.005714  |
| O | -2.459230 | 13.184059 | 5.445139 | 0.039455  | 0.048953  | -0.005061 |
| O | 4.912372  | 0.617542  | 0.921651 | -0.040026 | -0.049603 | 0.005067  |
| O | 2.757943  | 6.283259  | 4.105046 | -0.039808 | 0.049381  | 0.005068  |
| O | -0.304801 | 7.518342  | 2.261744 | 0.039587  | -0.049099 | -0.005045 |
| O | -0.175430 | 2.374756  | 0.744070 | 0.050928  | 0.019495  | 0.012596  |
| O | 2.628573  | 11.426844 | 5.622720 | -0.050351 | -0.019105 | -0.012663 |
| O | 4.783002  | 9.275557  | 2.439325 | -0.050470 | 0.019210  | -0.012601 |
| O | -2.329859 | 4.526044  | 3.927465 | 0.050727  | -0.019334 | 0.012663  |
| O | -1.223866 | 12.517207 | 2.155216 | -0.003094 | 0.009745  | -0.003581 |
| O | 3.677009  | 1.284394  | 4.211574 | 0.003047  | -0.009568 | 0.003478  |
| O | 5.831438  | 5.616407  | 1.028179 | 0.003068  | 0.009620  | 0.003496  |
| O | -3.378295 | 8.185194  | 5.338611 | -0.003075 | -0.009674 | -0.003558 |
| H | -0.637445 | 12.195109 | 2.878812 | -0.055804 | -0.023670 | 0.019243  |
| H | 3.090587  | 1.606491  | 3.487978 | 0.055186  | 0.023721  | -0.018934 |
| H | 5.245016  | 5.294309  | 0.304583 | 0.055042  | -0.023764 | -0.018750 |
| H | -2.791874 | 8.507292  | 6.062207 | -0.055749 | 0.023650  | 0.019278  |

73 f = 20.333926 THz 127.761825 2PiTHz 678.266743 cm-1 84.094389  
meV

|    | X         | Y         | Z        | dx        | dy        | dz        |
|----|-----------|-----------|----------|-----------|-----------|-----------|
| Li | 3.769818  | 9.645336  | 4.001386 | -0.006396 | 0.002692  | 0.000986  |
| Li | -1.316675 | 4.156264  | 2.365404 | 0.006401  | -0.002703 | -0.000992 |
| Li | -3.471104 | 2.744536  | 5.548798 | -0.006394 | -0.002687 | 0.000996  |
| Li | 5.924247  | 11.057064 | 0.817991 | 0.006408  | 0.002707  | -0.000984 |
| Na | 2.049025  | 6.784862  | 1.629696 | 0.002905  | -0.000135 | 0.001796  |
| Na | 0.404117  | 7.016739  | 4.737094 | -0.002908 | 0.000131  | -0.001802 |
| Na | 2.558546  | 13.685662 | 1.553699 | 0.002909  | 0.000134  | 0.001802  |
| Na | -0.105403 | 0.115939  | 4.813091 | -0.002904 | -0.000132 | -0.001796 |
| B  | 4.155007  | 8.978944  | 1.168663 | 0.004173  | -0.006099 | -0.007420 |
| B  | -1.701865 | 4.822656  | 5.198127 | -0.004185 | 0.006119  | 0.007402  |
| B  | 0.452564  | 2.078144  | 2.014732 | 0.004184  | 0.006116  | -0.007411 |
| B  | 2.000578  | 11.723457 | 4.352058 | -0.004180 | -0.006101 | 0.007418  |
| B  | -2.733891 | 11.746082 | 5.839177 | -0.001483 | -0.000740 | 0.005054  |
| B  | 5.187034  | 2.055518  | 0.527613 | 0.001495  | 0.000740  | -0.005074 |
| B  | 3.032605  | 4.845282  | 3.711007 | -0.001502 | 0.000741  | 0.005074  |
| B  | -0.579463 | 8.956318  | 2.655782 | 0.001473  | -0.000738 | -0.005051 |
| B  | -0.983708 | 0.054306  | 1.827988 | -0.072989 | 0.040540  | 0.092419  |
| B  | 3.436850  | 13.747295 | 4.538802 | 0.072986  | -0.040534 | -0.092410 |
| B  | 5.591279  | 6.955106  | 1.355407 | -0.072988 | -0.040530 | 0.092409  |
| B  | -3.138137 | 6.846495  | 5.011383 | 0.072957  | 0.040525  | -0.092382 |
| Si | 0.631772  | 3.486686  | 4.508512 | 0.012221  | -0.001167 | 0.006715  |
| Si | 1.821370  | 10.314915 | 1.858278 | -0.012207 | 0.001161  | -0.006722 |
| Si | -0.333059 | 10.387486 | 5.041673 | 0.012218  | 0.001168  | 0.006720  |
| Si | 2.786201  | 3.414115  | 1.325117 | -0.012218 | -0.001161 | -0.006712 |
| O  | 0.061445  | 3.072947  | 3.041906 | -0.009761 | 0.010039  | -0.000083 |
| O  | 2.391697  | 10.728653 | 3.324884 | 0.009761  | -0.010041 | 0.000093  |
| O  | 4.546126  | 9.973747  | 0.141489 | -0.009773 | -0.010050 | -0.000092 |
| O  | -2.092984 | 3.827853  | 6.225301 | 0.009748  | 0.010029  | 0.000081  |
| O  | 2.197450  | 3.933608  | 4.519003 | -0.004821 | 0.011932  | -0.006839 |
| O  | 0.255692  | 9.867992  | 1.847787 | 0.004812  | -0.011931 | 0.006830  |
| O  | -1.898737 | 10.834409 | 5.031182 | -0.004816 | -0.011935 | -0.006833 |
| O  | 4.351879  | 2.967192  | 1.335608 | 0.004824  | 0.011936  | 0.006842  |

|   |           |           |          |           |           |           |
|---|-----------|-----------|----------|-----------|-----------|-----------|
| O | -0.212316 | 4.798696  | 5.055280 | -0.000304 | -0.004938 | -0.001414 |
| O | 2.665458  | 9.002905  | 1.311510 | 0.000327  | 0.004957  | 0.001417  |
| O | 0.511030  | 11.699496 | 4.494905 | -0.000312 | 0.004945  | -0.001417 |
| O | 1.942113  | 2.102105  | 1.871885 | 0.000317  | -0.004950 | 0.001414  |
| O | 0.525580  | 2.169271  | 5.472081 | 0.000315  | -0.000372 | 0.002552  |
| O | 1.927562  | 11.632329 | 0.894709 | -0.000317 | 0.000372  | -0.002559 |
| O | -0.226867 | 9.070071  | 4.078104 | 0.000319  | 0.000373  | 0.002558  |
| O | 2.680009  | 4.731529  | 2.288686 | -0.000309 | -0.000371 | -0.002551 |
| O | 0.058846  | 0.698526  | 2.444964 | 0.030204  | -0.020493 | -0.008730 |
| O | 2.394296  | 13.103075 | 3.921826 | -0.030196 | 0.020494  | 0.008735  |
| O | 4.548725  | 7.599326  | 0.738431 | 0.030191  | 0.020490  | -0.008746 |
| O | -2.095583 | 6.202275  | 5.628359 | -0.030191 | -0.020483 | 0.008727  |
| O | -2.459230 | 13.184059 | 5.445139 | -0.004982 | 0.027792  | 0.030365  |
| O | 4.912372  | 0.617542  | 0.921651 | 0.004972  | -0.027802 | -0.030372 |
| O | 2.757943  | 6.283259  | 4.105046 | -0.004968 | -0.027796 | 0.030355  |
| O | -0.304801 | 7.518342  | 2.261744 | 0.004993  | 0.027776  | -0.030366 |
| O | -0.175430 | 2.374756  | 0.744070 | 0.008180  | 0.007330  | -0.013665 |
| O | 2.628573  | 11.426844 | 5.622720 | -0.008184 | -0.007337 | 0.013674  |
| O | 4.783002  | 9.275557  | 2.439325 | 0.008162  | -0.007318 | -0.013660 |
| O | -2.329859 | 4.526044  | 3.927465 | -0.008192 | 0.007334  | 0.013667  |
| O | -1.223866 | 12.517207 | 2.155216 | 0.014259  | -0.005887 | -0.022333 |
| O | 3.677009  | 1.284394  | 4.211574 | -0.014257 | 0.005880  | 0.022330  |
| O | 5.831438  | 5.616407  | 1.028179 | 0.014259  | 0.005884  | -0.022330 |
| O | -3.378295 | 8.185194  | 5.338611 | -0.014253 | -0.005887 | 0.022322  |
| H | -0.637445 | 12.195109 | 2.878812 | 0.005713  | -0.020278 | -0.022304 |
| H | 3.090587  | 1.606491  | 3.487978 | -0.005701 | 0.020260  | 0.022293  |
| H | 5.245016  | 5.294309  | 0.304583 | 0.005672  | 0.020266  | -0.022266 |
| H | -2.791874 | 8.507292  | 6.062207 | -0.005707 | -0.020260 | 0.022287  |

74 f = 20.238523 THz 127.162391 2PiTHz 675.084444 cm-1 83.699834  
meV

|    | X         | Y         | Z        | dx        | dy        | dz        |
|----|-----------|-----------|----------|-----------|-----------|-----------|
| Li | 3.769818  | 9.645336  | 4.001386 | -0.004164 | -0.004927 | -0.002852 |
| Li | -1.316675 | 4.156264  | 2.365404 | 0.004159  | 0.004922  | 0.002863  |
| Li | -3.471104 | 2.744536  | 5.548798 | 0.004159  | -0.004920 | 0.002861  |
| Li | 5.924247  | 11.057064 | 0.817991 | -0.004163 | 0.004928  | -0.002849 |

|    |           |           |          |           |           |           |
|----|-----------|-----------|----------|-----------|-----------|-----------|
| Na | 2.049025  | 6.784862  | 1.629696 | 0.002674  | 0.000158  | 0.001649  |
| Na | 0.404117  | 7.016739  | 4.737094 | -0.002677 | -0.000162 | -0.001657 |
| Na | 2.558546  | 13.685662 | 1.553699 | -0.002676 | 0.000161  | -0.001656 |
| Na | -0.105403 | 0.115939  | 4.813091 | 0.002673  | -0.000159 | 0.001649  |
| B  | 4.155007  | 8.978944  | 1.168663 | 0.006766  | -0.000412 | -0.014882 |
| B  | -1.701865 | 4.822656  | 5.198127 | -0.006765 | 0.000433  | 0.014887  |
| B  | 0.452564  | 2.078144  | 2.014732 | -0.006762 | -0.000426 | 0.014882  |
| B  | 2.000578  | 11.723457 | 4.352058 | 0.006771  | 0.000419  | -0.014883 |
| B  | -2.733891 | 11.746082 | 5.839177 | 0.007396  | -0.008204 | -0.004779 |
| B  | 5.187034  | 2.055518  | 0.527613 | -0.007384 | 0.008204  | 0.004787  |
| B  | 3.032605  | 4.845282  | 3.711007 | -0.007388 | -0.008195 | 0.004783  |
| B  | -0.579463 | 8.956318  | 2.655782 | 0.007394  | 0.008217  | -0.004785 |
| B  | -0.983708 | 0.054306  | 1.827988 | 0.072383  | -0.040216 | -0.091906 |
| B  | 3.436850  | 13.747295 | 4.538802 | -0.072391 | 0.040213  | 0.091915  |
| B  | 5.591279  | 6.955106  | 1.355407 | -0.072405 | -0.040223 | 0.091931  |
| B  | -3.138137 | 6.846495  | 5.011383 | 0.072412  | 0.040226  | -0.091942 |
| Si | 0.631772  | 3.486686  | 4.508512 | 0.007045  | 0.000187  | -0.006913 |
| Si | 1.821370  | 10.314915 | 1.858278 | -0.007045 | -0.000183 | 0.006913  |
| Si | -0.333059 | 10.387486 | 5.041673 | -0.007048 | 0.000188  | 0.006914  |
| Si | 2.786201  | 3.414115  | 1.325117 | 0.007042  | -0.000184 | -0.006916 |
| O  | 0.061445  | 3.072947  | 3.041906 | 0.005458  | -0.005498 | 0.004732  |
| O  | 2.391697  | 10.728653 | 3.324884 | -0.005459 | 0.005498  | -0.004732 |
| O  | 4.546126  | 9.973747  | 0.141489 | -0.005455 | -0.005502 | -0.004739 |
| O  | -2.092984 | 3.827853  | 6.225301 | 0.005466  | 0.005498  | 0.004727  |
| O  | 2.197450  | 3.933608  | 4.519003 | -0.007924 | 0.008862  | -0.005098 |
| O  | 0.255692  | 9.867992  | 1.847787 | 0.007928  | -0.008860 | 0.005082  |
| O  | -1.898737 | 10.834409 | 5.031182 | 0.007925  | 0.008862  | 0.005093  |
| O  | 4.351879  | 2.967192  | 1.335608 | -0.007929 | -0.008861 | -0.005089 |
| O  | -0.212316 | 4.798696  | 5.055280 | 0.005189  | -0.000882 | 0.000440  |
| O  | 2.665458  | 9.002905  | 1.311510 | -0.005210 | 0.000868  | -0.000439 |
| O  | 0.511030  | 11.699496 | 4.494905 | -0.005198 | -0.000872 | -0.000440 |
| O  | 1.942113  | 2.102105  | 1.871885 | 0.005201  | 0.000878  | 0.000439  |
| O  | 0.525580  | 2.169271  | 5.472081 | -0.005126 | -0.001378 | -0.007268 |
| O  | 1.927562  | 11.632329 | 0.894709 | 0.005119  | 0.001373  | 0.007265  |
| O  | -0.226867 | 9.070071  | 4.078104 | 0.005124  | -0.001385 | 0.007278  |
| O  | 2.680009  | 4.731529  | 2.288686 | -0.005120 | 0.001367  | -0.007259 |

|   |           |           |          |           |           |           |
|---|-----------|-----------|----------|-----------|-----------|-----------|
| O | 0.058846  | 0.698526  | 2.444964 | -0.028614 | 0.021947  | 0.005153  |
| O | 2.394296  | 13.103075 | 3.921826 | 0.028612  | -0.021939 | -0.005163 |
| O | 4.548725  | 7.599326  | 0.738431 | 0.028624  | 0.021956  | -0.005151 |
| O | -2.095583 | 6.202275  | 5.628359 | -0.028610 | -0.021938 | 0.005177  |
| O | -2.459230 | 13.184059 | 5.445139 | 0.003649  | -0.029333 | -0.028857 |
| O | 4.912372  | 0.617542  | 0.921651 | -0.003648 | 0.029340  | 0.028854  |
| O | 2.757943  | 6.283259  | 4.105046 | -0.003672 | -0.029329 | 0.028860  |
| O | -0.304801 | 7.518342  | 2.261744 | 0.003635  | 0.029350  | -0.028864 |
| O | -0.175430 | 2.374756  | 0.744070 | -0.007042 | -0.012635 | 0.012511  |
| O | 2.628573  | 11.426844 | 5.622720 | 0.007053  | 0.012633  | -0.012511 |
| O | 4.783002  | 9.275557  | 2.439325 | 0.007053  | -0.012644 | -0.012513 |
| O | -2.329859 | 4.526044  | 3.927465 | -0.007040 | 0.012620  | 0.012508  |
| O | -1.223866 | 12.517207 | 2.155216 | -0.012133 | 0.001191  | 0.023036  |
| O | 3.677009  | 1.284394  | 4.211574 | 0.012138  | -0.001196 | -0.023041 |
| O | 5.831438  | 5.616407  | 1.028179 | 0.012144  | 0.001183  | -0.023047 |
| O | -3.378295 | 8.185194  | 5.338611 | -0.012139 | -0.001208 | 0.023039  |
| H | -0.637445 | 12.195109 | 2.878812 | -0.041208 | 0.025600  | 0.058039  |
| H | 3.090587  | 1.606491  | 3.487978 | 0.041153  | -0.025599 | -0.057988 |
| H | 5.245016  | 5.294309  | 0.304583 | 0.041153  | 0.025594  | -0.057994 |
| H | -2.791874 | 8.507292  | 6.062207 | -0.041196 | -0.025610 | 0.058024  |

75 f = 19.873605 THz 124.869545 2PiTHz 662.912097 cm-1 82.190654 meV

|    | X         | Y         | Z        | dx        | dy        | dz        |
|----|-----------|-----------|----------|-----------|-----------|-----------|
| Li | 3.769818  | 9.645336  | 4.001386 | 0.011724  | -0.018352 | -0.007998 |
| Li | -1.316675 | 4.156264  | 2.365404 | 0.011729  | -0.018373 | -0.007989 |
| Li | -3.471104 | 2.744536  | 5.548798 | -0.011733 | -0.018374 | 0.007995  |
| Li | 5.924247  | 11.057064 | 0.817991 | -0.011726 | -0.018357 | 0.008003  |
| Na | 2.049025  | 6.784862  | 1.629696 | -0.000789 | 0.001599  | 0.000304  |
| Na | 0.404117  | 7.016739  | 4.737094 | -0.000791 | 0.001598  | 0.000315  |
| Na | 2.558546  | 13.685662 | 1.553699 | 0.000792  | 0.001600  | -0.000315 |
| Na | -0.105403 | 0.115939  | 4.813091 | 0.000790  | 0.001599  | -0.000304 |
| B  | 4.155007  | 8.978944  | 1.168663 | 0.000924  | 0.003814  | 0.001546  |
| B  | -1.701865 | 4.822656  | 5.198127 | 0.000929  | 0.003820  | 0.001561  |
| B  | 0.452564  | 2.078144  | 2.014732 | -0.000928 | 0.003822  | -0.001568 |
| B  | 2.000578  | 11.723457 | 4.352058 | -0.000923 | 0.003808  | -0.001549 |



|    |           |           |          |           |           |           |
|----|-----------|-----------|----------|-----------|-----------|-----------|
| B  | -2.733891 | 11.746082 | 5.839177 | -0.001800 | -0.000906 | 0.003939  |
| B  | 5.187034  | 2.055518  | 0.527613 | -0.001794 | -0.000904 | 0.003936  |
| B  | 3.032605  | 4.845282  | 3.711007 | 0.001800  | -0.000906 | -0.003941 |
| B  | -0.579463 | 8.956318  | 2.655782 | 0.001797  | -0.000901 | -0.003937 |
| B  | -0.983708 | 0.054306  | 1.827988 | -0.077494 | 0.035632  | 0.094825  |
| B  | 3.436850  | 13.747295 | 4.538802 | -0.077489 | 0.035618  | 0.094805  |
| B  | 5.591279  | 6.955106  | 1.355407 | 0.077440  | 0.035592  | -0.094748 |
| B  | -3.138137 | 6.846495  | 5.011383 | 0.077438  | 0.035605  | -0.094755 |
| Si | 0.631772  | 3.486686  | 4.508512 | 0.008865  | -0.001691 | 0.005944  |
| Si | 1.821370  | 10.314915 | 1.858278 | 0.008874  | -0.001680 | 0.005948  |
| Si | -0.333059 | 10.387486 | 5.041673 | -0.008875 | -0.001679 | -0.005944 |
| Si | 2.786201  | 3.414115  | 1.325117 | -0.008870 | -0.001692 | -0.005939 |
| O  | 0.061445  | 3.072947  | 3.041906 | -0.012019 | 0.013997  | -0.002052 |
| O  | 2.391697  | 10.728653 | 3.324884 | -0.012034 | 0.014007  | -0.002036 |
| O  | 4.546126  | 9.973747  | 0.141489 | 0.012032  | 0.014003  | 0.002034  |
| O  | -2.092984 | 3.827853  | 6.225301 | 0.012017  | 0.013995  | 0.002051  |
| O  | 2.197450  | 3.933608  | 4.519003 | -0.004532 | 0.010980  | -0.003757 |
| O  | 0.255692  | 9.867992  | 1.847787 | -0.004525 | 0.010975  | -0.003773 |
| O  | -1.898737 | 10.834409 | 5.031182 | 0.004528  | 0.010981  | 0.003773  |
| O  | 4.351879  | 2.967192  | 1.335608 | 0.004536  | 0.010984  | 0.003757  |
| O  | -0.212316 | 4.798696  | 5.055280 | 0.000694  | -0.006611 | -0.001455 |
| O  | 2.665458  | 9.002905  | 1.311510 | 0.000667  | -0.006624 | -0.001448 |
| O  | 0.511030  | 11.699496 | 4.494905 | -0.000668 | -0.006624 | 0.001447  |
| O  | 1.942113  | 2.102105  | 1.871885 | -0.000697 | -0.006612 | 0.001454  |
| O  | 0.525580  | 2.169271  | 5.472081 | -0.000747 | -0.000680 | 0.006393  |
| O  | 1.927562  | 11.632329 | 0.894709 | -0.000759 | -0.000693 | 0.006371  |
| O  | -0.226867 | 9.070071  | 4.078104 | 0.000760  | -0.000696 | -0.006367 |
| O  | 2.680009  | 4.731529  | 2.288686 | 0.000749  | -0.000680 | -0.006389 |
| O  | 0.058846  | 0.698526  | 2.444964 | 0.026535  | -0.014336 | -0.021532 |
| O  | 2.394296  | 13.103075 | 3.921826 | 0.026525  | -0.014333 | -0.021540 |
| O  | 4.548725  | 7.599326  | 0.738431 | -0.026509 | -0.014324 | 0.021530  |
| O  | -2.095583 | 6.202275  | 5.628359 | -0.026512 | -0.014321 | 0.021524  |
| O  | -2.459230 | 13.184059 | 5.445139 | 0.013907  | -0.016474 | -0.030273 |
| O  | 4.912372  | 0.617542  | 0.921651 | 0.013901  | -0.016498 | -0.030272 |
| O  | 2.757943  | 6.283259  | 4.105046 | -0.013897 | -0.016479 | 0.030252  |
| O  | -0.304801 | 7.518342  | 2.261744 | -0.013899 | -0.016467 | 0.030251  |

|   |           |           |          |           |           |           |
|---|-----------|-----------|----------|-----------|-----------|-----------|
| O | -0.175430 | 2.374756  | 0.744070 | 0.004829  | 0.001225  | -0.007862 |
| O | 2.628573  | 11.426844 | 5.622720 | 0.004835  | 0.001218  | -0.007850 |
| O | 4.783002  | 9.275557  | 2.439325 | -0.004837 | 0.001212  | 0.007850  |
| O | -2.329859 | 4.526044  | 3.927465 | -0.004822 | 0.001220  | 0.007851  |
| O | -1.223866 | 12.517207 | 2.155216 | 0.016760  | -0.004721 | -0.020577 |
| O | 3.677009  | 1.284394  | 4.211574 | 0.016760  | -0.004723 | -0.020565 |
| O | 5.831438  | 5.616407  | 1.028179 | -0.016748 | -0.004727 | 0.020553  |
| O | -3.378295 | 8.185194  | 5.338611 | -0.016748 | -0.004716 | 0.020559  |
| H | -0.637445 | 12.195109 | 2.878812 | -0.013339 | -0.011006 | 0.000001  |
| H | 3.090587  | 1.606491  | 3.487978 | -0.013365 | -0.010973 | 0.000050  |
| H | 5.245016  | 5.294309  | 0.304583 | 0.013363  | -0.010970 | -0.000054 |
| H | -2.791874 | 8.507292  | 6.062207 | 0.013327  | -0.011000 | -0.000002 |

76 f = 19.757382 THz 124.139295 2PiTHz 659.035320 cm-1 81.709995  
meV

|    | X         | Y         | Z        | dx        | dy        | dz        |
|----|-----------|-----------|----------|-----------|-----------|-----------|
| Li | 3.769818  | 9.645336  | 4.001386 | -0.005136 | 0.007215  | 0.006014  |
| Li | -1.316675 | 4.156264  | 2.365404 | -0.005146 | 0.007205  | 0.006008  |
| Li | -3.471104 | 2.744536  | 5.548798 | -0.005142 | -0.007204 | 0.006001  |
| Li | 5.924247  | 11.057064 | 0.817991 | -0.005124 | -0.007191 | 0.006013  |
| Na | 2.049025  | 6.784862  | 1.629696 | 0.000792  | -0.001115 | -0.000566 |
| Na | 0.404117  | 7.016739  | 4.737094 | 0.000793  | -0.001113 | -0.000576 |
| Na | 2.558546  | 13.685662 | 1.553699 | 0.000792  | 0.001113  | -0.000576 |
| Na | -0.105403 | 0.115939  | 4.813091 | 0.000792  | 0.001113  | -0.000566 |
| B  | 4.155007  | 8.978944  | 1.168663 | 0.004090  | 0.002741  | -0.006196 |
| B  | -1.701865 | 4.822656  | 5.198127 | 0.004093  | 0.002751  | -0.006204 |
| B  | 0.452564  | 2.078144  | 2.014732 | 0.004087  | -0.002743 | -0.006200 |
| B  | 2.000578  | 11.723457 | 4.352058 | 0.004096  | -0.002755 | -0.006199 |
| B  | -2.733891 | 11.746082 | 5.839177 | 0.004179  | -0.005701 | -0.000687 |
| B  | 5.187034  | 2.055518  | 0.527613 | 0.004177  | -0.005705 | -0.000680 |
| B  | 3.032605  | 4.845282  | 3.711007 | 0.004172  | 0.005706  | -0.000685 |
| B  | -0.579463 | 8.956318  | 2.655782 | 0.004178  | 0.005703  | -0.000674 |
| B  | -0.983708 | 0.054306  | 1.827988 | -0.080318 | 0.038139  | 0.096573  |
| B  | 3.436850  | 13.747295 | 4.538802 | -0.080346 | 0.038142  | 0.096580  |
| B  | 5.591279  | 6.955106  | 1.355407 | -0.080380 | -0.038160 | 0.096627  |
| B  | -3.138137 | 6.846495  | 5.011383 | -0.080388 | -0.038164 | 0.096653  |

|    |           |           |          |           |           |           |
|----|-----------|-----------|----------|-----------|-----------|-----------|
| Si | 0.631772  | 3.486686  | 4.508512 | -0.003026 | -0.001143 | 0.005914  |
| Si | 1.821370  | 10.314915 | 1.858278 | -0.003009 | -0.001147 | 0.005924  |
| Si | -0.333059 | 10.387486 | 5.041673 | -0.003009 | 0.001153  | 0.005923  |
| Si | 2.786201  | 3.414115  | 1.325117 | -0.003014 | 0.001136  | 0.005924  |
| O  | 0.061445  | 3.072947  | 3.041906 | -0.002838 | 0.005819  | -0.002311 |
| O  | 2.391697  | 10.728653 | 3.324884 | -0.002857 | 0.005836  | -0.002303 |
| O  | 4.546126  | 9.973747  | 0.141489 | -0.002863 | -0.005847 | -0.002311 |
| O  | -2.092984 | 3.827853  | 6.225301 | -0.002853 | -0.005830 | -0.002304 |
| O  | 2.197450  | 3.933608  | 4.519003 | 0.002646  | -0.003693 | -0.001681 |
| O  | 0.255692  | 9.867992  | 1.847787 | 0.002642  | -0.003677 | -0.001712 |
| O  | -1.898737 | 10.834409 | 5.031182 | 0.002636  | 0.003671  | -0.001702 |
| O  | 4.351879  | 2.967192  | 1.335608 | 0.002648  | 0.003684  | -0.001698 |
| O  | -0.212316 | 4.798696  | 5.055280 | -0.003128 | -0.001184 | -0.001712 |
| O  | 2.665458  | 9.002905  | 1.311510 | -0.003134 | -0.001180 | -0.001718 |
| O  | 0.511030  | 11.699496 | 4.494905 | -0.003126 | 0.001188  | -0.001721 |
| O  | 1.942113  | 2.102105  | 1.871885 | -0.003143 | 0.001189  | -0.001711 |
| O  | 0.525580  | 2.169271  | 5.472081 | 0.000754  | 0.003093  | 0.006841  |
| O  | 1.927562  | 11.632329 | 0.894709 | 0.000746  | 0.003098  | 0.006842  |
| O  | -0.226867 | 9.070071  | 4.078104 | 0.000749  | -0.003104 | 0.006860  |
| O  | 2.680009  | 4.731529  | 2.288686 | 0.000748  | -0.003085 | 0.006830  |
| O  | 0.058846  | 0.698526  | 2.444964 | 0.026395  | -0.017416 | -0.017383 |
| O  | 2.394296  | 13.103075 | 3.921826 | 0.026391  | -0.017430 | -0.017388 |
| O  | 4.548725  | 7.599326  | 0.738431 | 0.026407  | 0.017436  | -0.017403 |
| O  | -2.095583 | 6.202275  | 5.628359 | 0.026411  | 0.017427  | -0.017401 |
| O  | -2.459230 | 13.184059 | 5.445139 | 0.009565  | -0.017503 | -0.030388 |
| O  | 4.912372  | 0.617542  | 0.921651 | 0.009561  | -0.017517 | -0.030377 |
| O  | 2.757943  | 6.283259  | 4.105046 | 0.009576  | 0.017526  | -0.030403 |
| O  | -0.304801 | 7.518342  | 2.261744 | 0.009572  | 0.017513  | -0.030400 |
| O  | -0.175430 | 2.374756  | 0.744070 | 0.003891  | 0.006309  | -0.005013 |
| O  | 2.628573  | 11.426844 | 5.622720 | 0.003897  | 0.006306  | -0.005005 |
| O  | 4.783002  | 9.275557  | 2.439325 | 0.003896  | -0.006302 | -0.005005 |
| O  | -2.329859 | 4.526044  | 3.927465 | 0.003896  | -0.006311 | -0.005021 |
| O  | -1.223866 | 12.517207 | 2.155216 | 0.019440  | -0.002092 | -0.021927 |
| O  | 3.677009  | 1.284394  | 4.211574 | 0.019445  | -0.002100 | -0.021925 |
| O  | 5.831438  | 5.616407  | 1.028179 | 0.019453  | 0.002099  | -0.021933 |
| O  | -3.378295 | 8.185194  | 5.338611 | 0.019455  | 0.002102  | -0.021941 |

|   |           |           |          |           |           |          |
|---|-----------|-----------|----------|-----------|-----------|----------|
| H | -0.637445 | 12.195109 | 2.878812 | -0.025403 | -0.004174 | 0.012687 |
| H | 3.090587  | 1.606491  | 3.487978 | -0.025411 | -0.004157 | 0.012712 |
| H | 5.245016  | 5.294309  | 0.304583 | -0.025406 | 0.004166  | 0.012699 |
| H | -2.791874 | 8.507292  | 6.062207 | -0.025437 | 0.004184  | 0.012711 |

77 f = 19.270613 THz 121.080832 2PiTHz 642.798436 cm-1 79.696877  
meV

|    | X         | Y         | Z        | dx        | dy        | dz        |
|----|-----------|-----------|----------|-----------|-----------|-----------|
| Li | 3.769818  | 9.645336  | 4.001386 | -0.009912 | 0.013621  | -0.019508 |
| Li | -1.316675 | 4.156264  | 2.365404 | 0.009949  | -0.013576 | 0.019491  |
| Li | -3.471104 | 2.744536  | 5.548798 | -0.009998 | -0.013623 | -0.019492 |
| Li | 5.924247  | 11.057064 | 0.817991 | 0.009872  | 0.013585  | 0.019513  |
| Na | 2.049025  | 6.784862  | 1.629696 | 0.001674  | -0.002389 | 0.001373  |
| Na | 0.404117  | 7.016739  | 4.737094 | -0.001678 | 0.002416  | -0.001386 |
| Na | 2.558546  | 13.685662 | 1.553699 | 0.001675  | 0.002410  | 0.001384  |
| Na | -0.105403 | 0.115939  | 4.813091 | -0.001678 | -0.002396 | -0.001374 |
| B  | 4.155007  | 8.978944  | 1.168663 | -0.010522 | 0.000675  | -0.022056 |
| B  | -1.701865 | 4.822656  | 5.198127 | 0.010465  | -0.000587 | 0.021961  |
| B  | 0.452564  | 2.078144  | 2.014732 | -0.010473 | -0.000557 | -0.021992 |
| B  | 2.000578  | 11.723457 | 4.352058 | 0.010512  | 0.000700  | 0.022040  |
| B  | -2.733891 | 11.746082 | 5.839177 | -0.016628 | 0.006985  | -0.015524 |
| B  | 5.187034  | 2.055518  | 0.527613 | 0.016510  | -0.006898 | 0.015485  |
| B  | 3.032605  | 4.845282  | 3.711007 | -0.016523 | -0.006918 | -0.015499 |
| B  | -0.579463 | 8.956318  | 2.655782 | 0.016623  | 0.006960  | 0.015509  |
| B  | -0.983708 | 0.054306  | 1.827988 | -0.003102 | 0.008927  | 0.007286  |
| B  | 3.436850  | 13.747295 | 4.538802 | 0.003227  | -0.008991 | -0.007385 |
| B  | 5.591279  | 6.955106  | 1.355407 | -0.003200 | -0.008981 | 0.007361  |
| B  | -3.138137 | 6.846495  | 5.011383 | 0.003134  | 0.008935  | -0.007298 |
| Si | 0.631772  | 3.486686  | 4.508512 | -0.021845 | -0.026647 | -0.013763 |
| Si | 1.821370  | 10.314915 | 1.858278 | 0.021932  | 0.026772  | 0.013831  |
| Si | -0.333059 | 10.387486 | 5.041673 | -0.021945 | 0.026770  | -0.013814 |
| Si | 2.786201  | 3.414115  | 1.325117 | 0.021829  | -0.026654 | 0.013775  |
| O  | 0.061445  | 3.072947  | 3.041906 | 0.018444  | -0.005689 | -0.024458 |
| O  | 2.391697  | 10.728653 | 3.324884 | -0.018637 | 0.005729  | 0.024559  |
| O  | 4.546126  | 9.973747  | 0.141489 | 0.018675  | 0.005761  | -0.024553 |
| O  | -2.092984 | 3.827853  | 6.225301 | -0.018387 | -0.005637 | 0.024468  |

|   |           |           |          |           |           |           |
|---|-----------|-----------|----------|-----------|-----------|-----------|
| O | 2.197450  | 3.933608  | 4.519003 | -0.001773 | -0.009941 | 0.053388  |
| O | 0.255692  | 9.867992  | 1.847787 | 0.001821  | 0.009955  | -0.053519 |
| O | -1.898737 | 10.834409 | 5.031182 | -0.001823 | 0.009953  | 0.053511  |
| O | 4.351879  | 2.967192  | 1.335608 | 0.001768  | -0.009936 | -0.053398 |
| O | -0.212316 | 4.798696  | 5.055280 | 0.041880  | 0.021709  | 0.002067  |
| O | 2.665458  | 9.002905  | 1.311510 | -0.042169 | -0.021977 | -0.002041 |
| O | 0.511030  | 11.699496 | 4.494905 | 0.042143  | -0.021956 | 0.002047  |
| O | 1.942113  | 2.102105  | 1.871885 | -0.041910 | 0.021740  | -0.002047 |
| O | 0.525580  | 2.169271  | 5.472081 | 0.017965  | 0.041708  | 0.053440  |
| O | 1.927562  | 11.632329 | 0.894709 | -0.018042 | -0.041817 | -0.053601 |
| O | -0.226867 | 9.070071  | 4.078104 | 0.018053  | -0.041829 | 0.053608  |
| O | 2.680009  | 4.731529  | 2.288686 | -0.017944 | 0.041682  | -0.053428 |
| O | 0.058846  | 0.698526  | 2.444964 | 0.002519  | -0.001898 | 0.001545  |
| O | 2.394296  | 13.103075 | 3.921826 | -0.002539 | 0.001994  | -0.001549 |
| O | 4.548725  | 7.599326  | 0.738431 | 0.002546  | 0.001997  | 0.001583  |
| O | -2.095583 | 6.202275  | 5.628359 | -0.002511 | -0.001906 | -0.001513 |
| O | -2.459230 | 13.184059 | 5.445139 | 0.000844  | 0.009971  | -0.001252 |
| O | 4.912372  | 0.617542  | 0.921651 | -0.000837 | -0.009968 | 0.001294  |
| O | 2.757943  | 6.283259  | 4.105046 | 0.000833  | -0.009961 | -0.001291 |
| O | -0.304801 | 7.518342  | 2.261744 | -0.000854 | 0.009970  | 0.001253  |
| O | -0.175430 | 2.374756  | 0.744070 | -0.008161 | 0.008078  | 0.010385  |
| O | 2.628573  | 11.426844 | 5.622720 | 0.008222  | -0.008125 | -0.010481 |
| O | 4.783002  | 9.275557  | 2.439325 | -0.008204 | -0.008140 | 0.010427  |
| O | -2.329859 | 4.526044  | 3.927465 | 0.008173  | 0.008065  | -0.010451 |
| O | -1.223866 | 12.517207 | 2.155216 | -0.003233 | 0.012256  | -0.007812 |
| O | 3.677009  | 1.284394  | 4.211574 | 0.003160  | -0.012351 | 0.007850  |
| O | 5.831438  | 5.616407  | 1.028179 | -0.003171 | -0.012342 | -0.007831 |
| O | -3.378295 | 8.185194  | 5.338611 | 0.003220  | 0.012269  | 0.007828  |
| H | -0.637445 | 12.195109 | 2.878812 | 0.044694  | -0.004647 | -0.055460 |
| H | 3.090587  | 1.606491  | 3.487978 | -0.044464 | 0.004484  | 0.055215  |
| H | 5.245016  | 5.294309  | 0.304583 | 0.044502  | 0.004468  | -0.055225 |
| H | -2.791874 | 8.507292  | 6.062207 | -0.044640 | -0.004642 | 0.055424  |

78 f = 19.079860 THz 119.882297 2PiTHz 636.435609 cm-1 78.907987 meV

X Y Z dx dy dz

|    |           |           |          |           |           |           |
|----|-----------|-----------|----------|-----------|-----------|-----------|
| Li | 3.769818  | 9.645336  | 4.001386 | 0.001824  | -0.001464 | -0.022762 |
| Li | -1.316675 | 4.156264  | 2.365404 | 0.001794  | -0.001450 | -0.022848 |
| Li | -3.471104 | 2.744536  | 5.548798 | -0.001790 | -0.001435 | 0.022855  |
| Li | 5.924247  | 11.057064 | 0.817991 | -0.001812 | -0.001462 | 0.022754  |
| Na | 2.049025  | 6.784862  | 1.629696 | -0.000587 | 0.004113  | -0.002150 |
| Na | 0.404117  | 7.016739  | 4.737094 | -0.000576 | 0.004098  | -0.002135 |
| Na | 2.558546  | 13.685662 | 1.553699 | 0.000578  | 0.004103  | 0.002136  |
| Na | -0.105403 | 0.115939  | 4.813091 | 0.000588  | 0.004111  | 0.002150  |
| B  | 4.155007  | 8.978944  | 1.168663 | -0.010169 | 0.021084  | -0.014284 |
| B  | -1.701865 | 4.822656  | 5.198127 | -0.010202 | 0.021087  | -0.014400 |
| B  | 0.452564  | 2.078144  | 2.014732 | 0.010207  | 0.021086  | 0.014404  |
| B  | 2.000578  | 11.723457 | 4.352058 | 0.010168  | 0.021078  | 0.014306  |
| B  | -2.733891 | 11.746082 | 5.839177 | -0.022837 | 0.015081  | -0.007695 |
| B  | 5.187034  | 2.055518  | 0.527613 | -0.022922 | 0.015120  | -0.007767 |
| B  | 3.032605  | 4.845282  | 3.711007 | 0.022933  | 0.015121  | 0.007764  |
| B  | -0.579463 | 8.956318  | 2.655782 | 0.022847  | 0.015078  | 0.007698  |
| B  | -0.983708 | 0.054306  | 1.827988 | 0.010632  | -0.009621 | -0.006939 |
| B  | 3.436850  | 13.747295 | 4.538802 | 0.010615  | -0.009582 | -0.006914 |
| B  | 5.591279  | 6.955106  | 1.355407 | -0.010616 | -0.009581 | 0.006895  |
| B  | -3.138137 | 6.846495  | 5.011383 | -0.010648 | -0.009622 | 0.006952  |
| Si | 0.631772  | 3.486686  | 4.508512 | 0.024028  | 0.025977  | 0.014940  |
| Si | 1.821370  | 10.314915 | 1.858278 | 0.023934  | 0.025853  | 0.014868  |
| Si | -0.333059 | 10.387486 | 5.041673 | -0.023927 | 0.025860  | -0.014868 |
| Si | 2.786201  | 3.414115  | 1.325117 | -0.024029 | 0.025980  | -0.014933 |
| O  | 0.061445  | 3.072947  | 3.041906 | -0.027951 | 0.009905  | 0.019976  |
| O  | 2.391697  | 10.728653 | 3.324884 | -0.027847 | 0.009857  | 0.019883  |
| O  | 4.546126  | 9.973747  | 0.141489 | 0.027832  | 0.009838  | -0.019885 |
| O  | -2.092984 | 3.827853  | 6.225301 | 0.027933  | 0.009888  | -0.019981 |
| O  | 2.197450  | 3.933608  | 4.519003 | 0.000103  | 0.016344  | -0.048359 |
| O  | 0.255692  | 9.867992  | 1.847787 | 0.000111  | 0.016283  | -0.048097 |
| O  | -1.898737 | 10.834409 | 5.031182 | -0.000111 | 0.016276  | 0.048100  |
| O  | 4.351879  | 2.967192  | 1.335608 | -0.000097 | 0.016340  | 0.048358  |
| O  | -0.212316 | 4.798696  | 5.055280 | -0.042633 | -0.030722 | -0.004354 |
| O  | 2.665458  | 9.002905  | 1.311510 | -0.042464 | -0.030618 | -0.004342 |
| O  | 0.511030  | 11.699496 | 4.494905 | 0.042464  | -0.030619 | 0.004323  |
| O  | 1.942113  | 2.102105  | 1.871885 | 0.042639  | -0.030736 | 0.004346  |

|   |           |           |          |           |           |           |
|---|-----------|-----------|----------|-----------|-----------|-----------|
| O | 0.525580  | 2.169271  | 5.472081 | -0.015288 | -0.040794 | -0.043460 |
| O | 1.927562  | 11.632329 | 0.894709 | -0.015214 | -0.040598 | -0.043221 |
| O | -0.226867 | 9.070071  | 4.078104 | 0.015203  | -0.040587 | 0.043216  |
| O | 2.680009  | 4.731529  | 2.288686 | 0.015280  | -0.040784 | 0.043460  |
| O | 0.058846  | 0.698526  | 2.444964 | -0.002062 | 0.005879  | -0.000120 |
| O | 2.394296  | 13.103075 | 3.921826 | -0.002054 | 0.005866  | -0.000100 |
| O | 4.548725  | 7.599326  | 0.738431 | 0.002047  | 0.005868  | 0.000090  |
| O | -2.095583 | 6.202275  | 5.628359 | 0.002070  | 0.005896  | 0.000124  |
| O | -2.459230 | 13.184059 | 5.445139 | 0.005583  | -0.000949 | 0.001977  |
| O | 4.912372  | 0.617542  | 0.921651 | 0.005590  | -0.000919 | 0.001974  |
| O | 2.757943  | 6.283259  | 4.105046 | -0.005604 | -0.000900 | -0.001980 |
| O | -0.304801 | 7.518342  | 2.261744 | -0.005578 | -0.000976 | -0.001979 |
| O | -0.175430 | 2.374756  | 0.744070 | 0.008006  | -0.007731 | -0.018768 |
| O | 2.628573  | 11.426844 | 5.622720 | 0.007976  | -0.007695 | -0.018706 |
| O | 4.783002  | 9.275557  | 2.439325 | -0.007976 | -0.007688 | 0.018731  |
| O | -2.329859 | 4.526044  | 3.927465 | -0.007990 | -0.007742 | 0.018762  |
| O | -1.223866 | 12.517207 | 2.155216 | -0.009839 | -0.019618 | 0.004507  |
| O | 3.677009  | 1.284394  | 4.211574 | -0.009849 | -0.019560 | 0.004480  |
| O | 5.831438  | 5.616407  | 1.028179 | 0.009854  | -0.019567 | -0.004470 |
| O | -3.378295 | 8.185194  | 5.338611 | 0.009840  | -0.019614 | -0.004510 |
| H | -0.637445 | 12.195109 | 2.878812 | 0.025069  | -0.020453 | -0.024877 |
| H | 3.090587  | 1.606491  | 3.487978 | 0.025253  | -0.020467 | -0.025100 |
| H | 5.245016  | 5.294309  | 0.304583 | -0.025246 | -0.020485 | 0.025115  |
| H | -2.791874 | 8.507292  | 6.062207 | -0.025057 | -0.020448 | 0.024863  |

79 f = 18.855045 THz 118.469741 2PiTHz 628.936579 cm-1 77.978226 meV

|    | X         | Y         | Z        | dx        | dy        | dz        |
|----|-----------|-----------|----------|-----------|-----------|-----------|
| Li | 3.769818  | 9.645336  | 4.001386 | 0.026853  | -0.013142 | 0.021704  |
| Li | -1.316675 | 4.156264  | 2.365404 | -0.026835 | 0.013115  | -0.021699 |
| Li | -3.471104 | 2.744536  | 5.548798 | -0.026870 | -0.013123 | -0.021717 |
| Li | 5.924247  | 11.057064 | 0.817991 | 0.026775  | 0.013123  | 0.021648  |
| Na | 2.049025  | 6.784862  | 1.629696 | -0.000466 | 0.002306  | 0.000604  |
| Na | 0.404117  | 7.016739  | 4.737094 | 0.000457  | -0.002310 | -0.000629 |
| Na | 2.558546  | 13.685662 | 1.553699 | 0.000456  | 0.002309  | -0.000630 |
| Na | -0.105403 | 0.115939  | 4.813091 | -0.000466 | -0.002303 | 0.000606  |

|    |           |           |          |           |           |           |
|----|-----------|-----------|----------|-----------|-----------|-----------|
| B  | 4.155007  | 8.978944  | 1.168663 | 0.014058  | 0.003579  | 0.038631  |
| B  | -1.701865 | 4.822656  | 5.198127 | -0.014118 | -0.003585 | -0.038799 |
| B  | 0.452564  | 2.078144  | 2.014732 | -0.014111 | 0.003590  | -0.038795 |
| B  | 2.000578  | 11.723457 | 4.352058 | 0.014068  | -0.003579 | 0.038639  |
| B  | -2.733891 | 11.746082 | 5.839177 | 0.043839  | 0.006042  | 0.001541  |
| B  | 5.187034  | 2.055518  | 0.527613 | -0.043989 | -0.006058 | -0.001532 |
| B  | 3.032605  | 4.845282  | 3.711007 | -0.043988 | 0.006059  | -0.001537 |
| B  | -0.579463 | 8.956318  | 2.655782 | 0.043827  | -0.006045 | 0.001535  |
| B  | -0.983708 | 0.054306  | 1.827988 | 0.027121  | -0.000336 | 0.013166  |
| B  | 3.436850  | 13.747295 | 4.538802 | -0.027024 | 0.000326  | -0.013136 |
| B  | 5.591279  | 6.955106  | 1.355407 | -0.027027 | -0.000327 | -0.013125 |
| B  | -3.138137 | 6.846495  | 5.011383 | 0.027112  | 0.000331  | 0.013176  |
| Si | 0.631772  | 3.486686  | 4.508512 | -0.009251 | 0.018052  | -0.006167 |
| Si | 1.821370  | 10.314915 | 1.858278 | 0.009236  | -0.018012 | 0.006142  |
| Si | -0.333059 | 10.387486 | 5.041673 | 0.009238  | 0.018008  | 0.006145  |
| Si | 2.786201  | 3.414115  | 1.325117 | -0.009256 | -0.018050 | -0.006169 |
| O  | 0.061445  | 3.072947  | 3.041906 | 0.040328  | -0.046130 | 0.006687  |
| O  | 2.391697  | 10.728653 | 3.324884 | -0.040361 | 0.046044  | -0.006676 |
| O  | 4.546126  | 9.973747  | 0.141489 | -0.040280 | -0.045997 | -0.006666 |
| O  | -2.092984 | 3.827853  | 6.225301 | 0.040371  | 0.046154  | 0.006687  |
| O  | 2.197450  | 3.933608  | 4.519003 | 0.011163  | -0.032466 | 0.016840  |
| O  | 0.255692  | 9.867992  | 1.847787 | -0.011094 | 0.032319  | -0.016675 |
| O  | -1.898737 | 10.834409 | 5.031182 | -0.011123 | -0.032357 | -0.016744 |
| O  | 4.351879  | 2.967192  | 1.335608 | 0.011150  | 0.032453  | 0.016816  |
| O  | -0.212316 | 4.798696  | 5.055280 | 0.001078  | -0.007793 | 0.034616  |
| O  | 2.665458  | 9.002905  | 1.311510 | -0.001034 | 0.007816  | -0.034498 |
| O  | 0.511030  | 11.699496 | 4.494905 | -0.001010 | -0.007870 | -0.034521 |
| O  | 1.942113  | 2.102105  | 1.871885 | 0.001097  | 0.007769  | 0.034611  |
| O  | 0.525580  | 2.169271  | 5.472081 | 0.028626  | 0.011478  | -0.003857 |
| O  | 1.927562  | 11.632329 | 0.894709 | -0.028531 | -0.011454 | 0.003835  |
| O  | -0.226867 | 9.070071  | 4.078104 | -0.028522 | 0.011503  | 0.003800  |
| O  | 2.680009  | 4.731529  | 2.288686 | 0.028633  | -0.011460 | -0.003870 |
| O  | 0.058846  | 0.698526  | 2.444964 | 0.005699  | 0.024346  | 0.010761  |
| O  | 2.394296  | 13.103075 | 3.921826 | -0.005696 | -0.024225 | -0.010771 |
| O  | 4.548725  | 7.599326  | 0.738431 | -0.005699 | 0.024231  | -0.010760 |
| O  | -2.095583 | 6.202275  | 5.628359 | 0.005698  | -0.024337 | 0.010771  |



|   |           |           |          |           |           |           |
|---|-----------|-----------|----------|-----------|-----------|-----------|
| O | -2.459230 | 13.184059 | 5.445139 | -0.011383 | 0.022773  | -0.007268 |
| O | 4.912372  | 0.617542  | 0.921651 | 0.011447  | -0.022818 | 0.007305  |
| O | 2.757943  | 6.283259  | 4.105046 | 0.011452  | 0.022820  | 0.007300  |
| O | -0.304801 | 7.518342  | 2.261744 | -0.011366 | -0.022781 | -0.007276 |
| O | -0.175430 | 2.374756  | 0.744070 | -0.036090 | -0.000071 | -0.024619 |
| O | 2.628573  | 11.426844 | 5.622720 | 0.035965  | 0.000048  | 0.024562  |
| O | 4.783002  | 9.275557  | 2.439325 | 0.035944  | -0.000049 | 0.024541  |
| O | -2.329859 | 4.526044  | 3.927465 | -0.036105 | 0.000063  | -0.024621 |
| O | -1.223866 | 12.517207 | 2.155216 | -0.009212 | 0.001746  | -0.008538 |
| O | 3.677009  | 1.284394  | 4.211574 | 0.009180  | -0.001753 | 0.008519  |
| O | 5.831438  | 5.616407  | 1.028179 | 0.009183  | 0.001760  | 0.008517  |
| O | -3.378295 | 8.185194  | 5.338611 | -0.009204 | -0.001745 | -0.008544 |
| H | -0.637445 | 12.195109 | 2.878812 | -0.031225 | -0.039174 | -0.009535 |
| H | 3.090587  | 1.606491  | 3.487978 | 0.031013  | 0.039034  | 0.009597  |
| H | 5.245016  | 5.294309  | 0.304583 | 0.030980  | -0.039043 | 0.009631  |
| H | -2.791874 | 8.507292  | 6.062207 | -0.031279 | 0.039145  | -0.009477 |

80 f = 18.843770 THz 118.398898 2PiTHz 628.560485 cm-1 77.931596 meV

|    | X         | Y         | Z        | dx        | dy        | dz        |
|----|-----------|-----------|----------|-----------|-----------|-----------|
| Li | 3.769818  | 9.645336  | 4.001386 | -0.022822 | 0.018160  | -0.015282 |
| Li | -1.316675 | 4.156264  | 2.365404 | -0.022679 | 0.018105  | -0.015197 |
| Li | -3.471104 | 2.744536  | 5.548798 | -0.022740 | -0.018129 | -0.015197 |
| Li | 5.924247  | 11.057064 | 0.817991 | -0.022748 | -0.018133 | -0.015254 |
| Na | 2.049025  | 6.784862  | 1.629696 | -0.002416 | 0.001909  | -0.001313 |
| Na | 0.404117  | 7.016739  | 4.737094 | -0.002415 | 0.001918  | -0.001310 |
| Na | 2.558546  | 13.685662 | 1.553699 | -0.002416 | -0.001915 | -0.001308 |
| Na | -0.105403 | 0.115939  | 4.813091 | -0.002415 | -0.001913 | -0.001313 |
| B  | 4.155007  | 8.978944  | 1.168663 | -0.012178 | -0.003810 | -0.042194 |
| B  | -1.701865 | 4.822656  | 5.198127 | -0.012151 | -0.003785 | -0.042102 |
| B  | 0.452564  | 2.078144  | 2.014732 | -0.012135 | 0.003806  | -0.042088 |
| B  | 2.000578  | 11.723457 | 4.352058 | -0.012190 | 0.003806  | -0.042211 |
| B  | -2.733891 | 11.746082 | 5.839177 | -0.047411 | -0.003829 | 0.002004  |
| B  | 5.187034  | 2.055518  | 0.527613 | -0.047280 | -0.003802 | 0.002007  |
| B  | 3.032605  | 4.845282  | 3.711007 | -0.047266 | 0.003819  | 0.002007  |
| B  | -0.579463 | 8.956318  | 2.655782 | -0.047405 | 0.003824  | 0.002005  |

|    |           |           |          |           |           |           |
|----|-----------|-----------|----------|-----------|-----------|-----------|
| B  | -0.983708 | 0.054306  | 1.827988 | 0.021342  | 0.004604  | 0.017381  |
| B  | 3.436850  | 13.747295 | 4.538802 | 0.021411  | 0.004614  | 0.017433  |
| B  | 5.591279  | 6.955106  | 1.355407 | 0.021414  | -0.004604 | 0.017424  |
| B  | -3.138137 | 6.846495  | 5.011383 | 0.021327  | -0.004621 | 0.017394  |
| Si | 0.631772  | 3.486686  | 4.508512 | -0.007344 | 0.014657  | -0.008049 |
| Si | 1.821370  | 10.314915 | 1.858278 | -0.007398 | 0.014698  | -0.008084 |
| Si | -0.333059 | 10.387486 | 5.041673 | -0.007383 | -0.014708 | -0.008078 |
| Si | 2.786201  | 3.414115  | 1.325117 | -0.007375 | -0.014632 | -0.008063 |
| O  | 0.061445  | 3.072947  | 3.041906 | 0.038515  | -0.046584 | 0.005024  |
| O  | 2.391697  | 10.728653 | 3.324884 | 0.038724  | -0.046761 | 0.005030  |
| O  | 4.546126  | 9.973747  | 0.141489 | 0.038637  | 0.046712  | 0.005029  |
| O  | -2.092984 | 3.827853  | 6.225301 | 0.038601  | 0.046626  | 0.005010  |
| O  | 2.197450  | 3.933608  | 4.519003 | 0.007445  | -0.029172 | 0.015697  |
| O  | 0.255692  | 9.867992  | 1.847787 | 0.007467  | -0.029264 | 0.015750  |
| O  | -1.898737 | 10.834409 | 5.031182 | 0.007487  | 0.029284  | 0.015783  |
| O  | 4.351879  | 2.967192  | 1.335608 | 0.007428  | 0.029169  | 0.015703  |
| O  | -0.212316 | 4.798696  | 5.055280 | 0.003421  | -0.005873 | 0.035204  |
| O  | 2.665458  | 9.002905  | 1.311510 | 0.003466  | -0.005837 | 0.035298  |
| O  | 0.511030  | 11.699496 | 4.494905 | 0.003430  | 0.005899  | 0.035316  |
| O  | 1.942113  | 2.102105  | 1.871885 | 0.003477  | 0.005807  | 0.035198  |
| O  | 0.525580  | 2.169271  | 5.472081 | 0.029830  | 0.013112  | -0.002449 |
| O  | 1.927562  | 11.632329 | 0.894709 | 0.029935  | 0.013124  | -0.002470 |
| O  | -0.226867 | 9.070071  | 4.078104 | 0.029915  | -0.013147 | -0.002459 |
| O  | 2.680009  | 4.731529  | 2.288686 | 0.029855  | -0.013118 | -0.002433 |
| O  | 0.058846  | 0.698526  | 2.444964 | 0.007147  | 0.024676  | 0.009627  |
| O  | 2.394296  | 13.103075 | 3.921826 | 0.007165  | 0.024734  | 0.009679  |
| O  | 4.548725  | 7.599326  | 0.738431 | 0.007170  | -0.024738 | 0.009668  |
| O  | -2.095583 | 6.202275  | 5.628359 | 0.007147  | -0.024658 | 0.009647  |
| O  | -2.459230 | 13.184059 | 5.445139 | 0.012201  | -0.022179 | 0.004457  |
| O  | 4.912372  | 0.617542  | 0.921651 | 0.012159  | -0.022110 | 0.004443  |
| O  | 2.757943  | 6.283259  | 4.105046 | 0.012162  | 0.022112  | 0.004436  |
| O  | -0.304801 | 7.518342  | 2.261744 | 0.012183  | 0.022185  | 0.004458  |
| O  | -0.175430 | 2.374756  | 0.744070 | -0.038017 | -0.000685 | -0.022504 |
| O  | 2.628573  | 11.426844 | 5.622720 | -0.038158 | -0.000675 | -0.022567 |
| O  | 4.783002  | 9.275557  | 2.439325 | -0.038129 | 0.000675  | -0.022559 |
| O  | -2.329859 | 4.526044  | 3.927465 | -0.038048 | 0.000670  | -0.022491 |

|   |           |           |          |           |           |           |
|---|-----------|-----------|----------|-----------|-----------|-----------|
| O | -1.223866 | 12.517207 | 2.155216 | -0.003519 | 0.001928  | -0.009358 |
| O | 3.677009  | 1.284394  | 4.211574 | -0.003552 | 0.001947  | -0.009390 |
| O | 5.831438  | 5.616407  | 1.028179 | -0.003542 | -0.001943 | -0.009385 |
| O | -3.378295 | 8.185194  | 5.338611 | -0.003521 | -0.001952 | -0.009361 |
| H | -0.637445 | 12.195109 | 2.878812 | -0.077559 | -0.023081 | 0.037234  |
| H | 3.090587  | 1.606491  | 3.487978 | -0.077561 | -0.023207 | 0.037108  |
| H | 5.245016  | 5.294309  | 0.304583 | -0.077646 | 0.023190  | 0.037200  |
| H | -2.791874 | 8.507292  | 6.062207 | -0.077447 | 0.023089  | 0.037122  |

81 f = 18.683366 THz 117.391052 2PiTHz 623.209994 cm-1 77.268219 meV

|    | X         | Y         | Z        | dx        | dy        | dz        |
|----|-----------|-----------|----------|-----------|-----------|-----------|
| Li | 3.769818  | 9.645336  | 4.001386 | 0.060819  | -0.022934 | 0.033072  |
| Li | -1.316675 | 4.156264  | 2.365404 | -0.060634 | 0.022907  | -0.032955 |
| Li | -3.471104 | 2.744536  | 5.548798 | 0.060605  | 0.022865  | 0.032943  |
| Li | 5.924247  | 11.057064 | 0.817991 | -0.060854 | -0.022973 | -0.033101 |
| Na | 2.049025  | 6.784862  | 1.629696 | 0.000084  | 0.005549  | -0.002081 |
| Na | 0.404117  | 7.016739  | 4.737094 | -0.000081 | -0.005535 | 0.002078  |
| Na | 2.558546  | 13.685662 | 1.553699 | 0.000078  | -0.005547 | -0.002080 |
| Na | -0.105403 | 0.115939  | 4.813091 | -0.000087 | 0.005540  | 0.002079  |
| B  | 4.155007  | 8.978944  | 1.168663 | -0.004418 | 0.004741  | -0.010219 |
| B  | -1.701865 | 4.822656  | 5.198127 | 0.004394  | -0.004741 | 0.010161  |
| B  | 0.452564  | 2.078144  | 2.014732 | -0.004413 | -0.004747 | -0.010193 |
| B  | 2.000578  | 11.723457 | 4.352058 | 0.004390  | 0.004742  | 0.010158  |
| B  | -2.733891 | 11.746082 | 5.839177 | 0.002963  | 0.005307  | 0.005448  |
| B  | 5.187034  | 2.055518  | 0.527613 | -0.002995 | -0.005320 | -0.005409 |
| B  | 3.032605  | 4.845282  | 3.711007 | 0.002973  | -0.005308 | 0.005411  |
| B  | -0.579463 | 8.956318  | 2.655782 | -0.003021 | 0.005331  | -0.005441 |
| B  | -0.983708 | 0.054306  | 1.827988 | -0.003577 | 0.005698  | 0.009520  |
| B  | 3.436850  | 13.747295 | 4.538802 | 0.003639  | -0.005719 | -0.009557 |
| B  | 5.591279  | 6.955106  | 1.355407 | -0.003606 | -0.005726 | 0.009585  |
| B  | -3.138137 | 6.846495  | 5.011383 | 0.003583  | 0.005692  | -0.009502 |
| Si | 0.631772  | 3.486686  | 4.508512 | -0.005609 | -0.003152 | -0.001719 |
| Si | 1.821370  | 10.314915 | 1.858278 | 0.005609  | 0.003167  | 0.001721  |
| Si | -0.333059 | 10.387486 | 5.041673 | -0.005618 | 0.003145  | -0.001732 |
| Si | 2.786201  | 3.414115  | 1.325117 | 0.005605  | -0.003159 | 0.001714  |

|   |           |           |          |           |           |           |
|---|-----------|-----------|----------|-----------|-----------|-----------|
| O | 0.061445  | 3.072947  | 3.041906 | 0.065536  | -0.039383 | 0.003632  |
| O | 2.391697  | 10.728653 | 3.324884 | -0.065703 | 0.039453  | -0.003642 |
| O | 4.546126  | 9.973747  | 0.141489 | 0.065781  | 0.039528  | 0.003649  |
| O | -2.092984 | 3.827853  | 6.225301 | -0.065470 | -0.039333 | -0.003627 |
| O | 2.197450  | 3.933608  | 4.519003 | -0.018104 | 0.016958  | -0.034643 |
| O | 0.255692  | 9.867992  | 1.847787 | 0.018172  | -0.017036 | 0.034773  |
| O | -1.898737 | 10.834409 | 5.031182 | -0.018169 | -0.017002 | -0.034779 |
| O | 4.351879  | 2.967192  | 1.335608 | 0.018096  | 0.016962  | 0.034618  |
| O | -0.212316 | 4.798696  | 5.055280 | 0.023713  | 0.046597  | -0.014406 |
| O | 2.665458  | 9.002905  | 1.311510 | -0.023813 | -0.046807 | 0.014500  |
| O | 0.511030  | 11.699496 | 4.494905 | 0.023801  | -0.046776 | -0.014452 |
| O | 1.942113  | 2.102105  | 1.871885 | -0.023736 | 0.046639  | 0.014440  |
| O | 0.525580  | 2.169271  | 5.472081 | 0.010540  | -0.025955 | -0.016184 |
| O | 1.927562  | 11.632329 | 0.894709 | -0.010534 | 0.026111  | 0.016278  |
| O | -0.226867 | 9.070071  | 4.078104 | 0.010580  | 0.026064  | -0.016260 |
| O | 2.680009  | 4.731529  | 2.288686 | -0.010524 | -0.025994 | 0.016206  |
| O | 0.058846  | 0.698526  | 2.444964 | -0.001476 | -0.006090 | 0.012896  |
| O | 2.394296  | 13.103075 | 3.921826 | 0.001489  | 0.006147  | -0.012923 |
| O | 4.548725  | 7.599326  | 0.738431 | -0.001481 | 0.006105  | 0.012933  |
| O | -2.095583 | 6.202275  | 5.628359 | 0.001475  | -0.006107 | -0.012899 |
| O | -2.459230 | 13.184059 | 5.445139 | -0.007865 | -0.003549 | 0.006452  |
| O | 4.912372  | 0.617542  | 0.921651 | 0.007859  | 0.003526  | -0.006413 |
| O | 2.757943  | 6.283259  | 4.105046 | -0.007841 | 0.003531  | 0.006422  |
| O | -0.304801 | 7.518342  | 2.261744 | 0.007885  | -0.003518 | -0.006437 |
| O | -0.175430 | 2.374756  | 0.744070 | -0.018202 | 0.003313  | -0.008403 |
| O | 2.628573  | 11.426844 | 5.622720 | 0.018213  | -0.003327 | 0.008415  |
| O | 4.783002  | 9.275557  | 2.439325 | -0.018266 | -0.003324 | -0.008442 |
| O | -2.329859 | 4.526044  | 3.927465 | 0.018181  | 0.003319  | 0.008387  |
| O | -1.223866 | 12.517207 | 2.155216 | -0.000986 | 0.006399  | 0.001860  |
| O | 3.677009  | 1.284394  | 4.211574 | 0.000948  | -0.006382 | -0.001857 |
| O | 5.831438  | 5.616407  | 1.028179 | -0.000958 | -0.006387 | 0.001838  |
| O | -3.378295 | 8.185194  | 5.338611 | 0.000987  | 0.006397  | -0.001867 |
| H | -0.637445 | 12.195109 | 2.878812 | 0.062146  | -0.011339 | -0.057264 |
| H | 3.090587  | 1.606491  | 3.487978 | -0.062115 | 0.011236  | 0.057149  |
| H | 5.245016  | 5.294309  | 0.304583 | 0.062010  | 0.011274  | -0.057116 |
| H | -2.791874 | 8.507292  | 6.062207 | -0.062221 | -0.011337 | 0.057312  |

82 f = 18.649504 THz 117.178287 2PiTHz 622.080462 cm-1 77.128175

meV

|    | X         | Y         | Z        | dx        | dy        | dz        |
|----|-----------|-----------|----------|-----------|-----------|-----------|
| Li | 3.769818  | 9.645336  | 4.001386 | 0.059882  | -0.016602 | 0.035125  |
| Li | -1.316675 | 4.156264  | 2.365404 | 0.060155  | -0.016752 | 0.035210  |
| Li | -3.471104 | 2.744536  | 5.548798 | -0.060123 | -0.016735 | -0.035185 |
| Li | 5.924247  | 11.057064 | 0.817991 | -0.059902 | -0.016611 | -0.035141 |
| Na | 2.049025  | 6.784862  | 1.629696 | 0.001041  | 0.000293  | -0.000188 |
| Na | 0.404117  | 7.016739  | 4.737094 | 0.001044  | 0.000306  | -0.000193 |
| Na | 2.558546  | 13.685662 | 1.553699 | -0.001046 | 0.000304  | 0.000193  |
| Na | -0.105403 | 0.115939  | 4.813091 | -0.001041 | 0.000296  | 0.000188  |
| B  | 4.155007  | 8.978944  | 1.168663 | -0.005866 | 0.003339  | -0.005916 |
| B  | -1.701865 | 4.822656  | 5.198127 | -0.005875 | 0.003348  | -0.005948 |
| B  | 0.452564  | 2.078144  | 2.014732 | 0.005892  | 0.003353  | 0.005979  |
| B  | 2.000578  | 11.723457 | 4.352058 | 0.005850  | 0.003338  | 0.005865  |
| B  | -2.733891 | 11.746082 | 5.839177 | 0.004003  | 0.001117  | 0.007639  |
| B  | 5.187034  | 2.055518  | 0.527613 | 0.004004  | 0.001217  | 0.007659  |
| B  | 3.032605  | 4.845282  | 3.711007 | -0.003973 | 0.001214  | -0.007647 |
| B  | -0.579463 | 8.956318  | 2.655782 | -0.004050 | 0.001131  | -0.007640 |
| B  | -0.983708 | 0.054306  | 1.827988 | 0.007311  | -0.004859 | -0.010892 |
| B  | 3.436850  | 13.747295 | 4.538802 | 0.007332  | -0.004815 | -0.010813 |
| B  | 5.591279  | 6.955106  | 1.355407 | -0.007305 | -0.004813 | 0.010839  |
| B  | -3.138137 | 6.846495  | 5.011383 | -0.007329 | -0.004860 | 0.010882  |
| Si | 0.631772  | 3.486686  | 4.508512 | 0.002922  | 0.000381  | -0.000211 |
| Si | 1.821370  | 10.314915 | 1.858278 | 0.002850  | 0.000347  | -0.000267 |
| Si | -0.333059 | 10.387486 | 5.041673 | -0.002860 | 0.000326  | 0.000260  |
| Si | 2.786201  | 3.414115  | 1.325117 | -0.002912 | 0.000397  | 0.000212  |
| O  | 0.061445  | 3.072947  | 3.041906 | -0.063490 | 0.036742  | -0.004953 |
| O  | 2.391697  | 10.728653 | 3.324884 | -0.063160 | 0.036488  | -0.004942 |
| O  | 4.546126  | 9.973747  | 0.141489 | 0.063196  | 0.036538  | 0.004945  |
| O  | -2.092984 | 3.827853  | 6.225301 | 0.063442  | 0.036697  | 0.004946  |
| O  | 2.197450  | 3.933608  | 4.519003 | 0.020445  | -0.020640 | 0.042095  |
| O  | 0.255692  | 9.867992  | 1.847787 | 0.020402  | -0.020644 | 0.042109  |
| O  | -1.898737 | 10.834409 | 5.031182 | -0.020392 | -0.020609 | -0.042091 |
| O  | 4.351879  | 2.967192  | 1.335608 | -0.020453 | -0.020664 | -0.042103 |

|   |           |           |          |           |           |           |
|---|-----------|-----------|----------|-----------|-----------|-----------|
| O | -0.212316 | 4.798696  | 5.055280 | -0.021268 | -0.043318 | 0.015019  |
| O | 2.665458  | 9.002905  | 1.311510 | -0.021138 | -0.043131 | 0.015029  |
| O | 0.511030  | 11.699496 | 4.494905 | 0.021144  | -0.043125 | -0.014991 |
| O | 1.942113  | 2.102105  | 1.871885 | 0.021275  | -0.043343 | -0.015053 |
| O | 0.525580  | 2.169271  | 5.472081 | -0.008068 | 0.031430  | 0.021648  |
| O | 1.927562  | 11.632329 | 0.894709 | -0.007966 | 0.031478  | 0.021681  |
| O | -0.226867 | 9.070071  | 4.078104 | 0.008004  | 0.031456  | -0.021681 |
| O | 2.680009  | 4.731529  | 2.288686 | 0.008048  | 0.031447  | -0.021647 |
| O | 0.058846  | 0.698526  | 2.444964 | 0.002212  | 0.009104  | -0.009923 |
| O | 2.394296  | 13.103075 | 3.921826 | 0.002218  | 0.009137  | -0.009862 |
| O | 4.548725  | 7.599326  | 0.738431 | -0.002211 | 0.009105  | 0.009869  |
| O | -2.095583 | 6.202275  | 5.628359 | -0.002213 | 0.009122  | 0.009916  |
| O | -2.459230 | 13.184059 | 5.445139 | -0.008769 | -0.004184 | 0.006909  |
| O | 4.912372  | 0.617542  | 0.921651 | -0.008793 | -0.004133 | 0.006900  |
| O | 2.757943  | 6.283259  | 4.105046 | 0.008781  | -0.004143 | -0.006909 |
| O | -0.304801 | 7.518342  | 2.261744 | 0.008784  | -0.004155 | -0.006897 |
| O | -0.175430 | 2.374756  | 0.744070 | 0.016753  | -0.002545 | 0.009451  |
| O | 2.628573  | 11.426844 | 5.622720 | 0.016636  | -0.002517 | 0.009419  |
| O | 4.783002  | 9.275557  | 2.439325 | -0.016681 | -0.002516 | -0.009444 |
| O | -2.329859 | 4.526044  | 3.927465 | -0.016724 | -0.002549 | -0.009428 |
| O | -1.223866 | 12.517207 | 2.155216 | -0.009076 | 0.001302  | 0.003116  |
| O | 3.677009  | 1.284394  | 4.211574 | -0.009092 | 0.001356  | 0.003092  |
| O | 5.831438  | 5.616407  | 1.028179 | 0.009079  | 0.001355  | -0.003103 |
| O | -3.378295 | 8.185194  | 5.338611 | 0.009082  | 0.001306  | -0.003111 |
| H | -0.637445 | 12.195109 | 2.878812 | 0.039986  | -0.023105 | -0.047426 |
| H | 3.090587  | 1.606491  | 3.487978 | 0.040208  | -0.023204 | -0.047718 |
| H | 5.245016  | 5.294309  | 0.304583 | -0.040270 | -0.023152 | 0.047719  |
| H | -2.791874 | 8.507292  | 6.062207 | -0.039979 | -0.023132 | 0.047444  |

83 f = 18.334452 THz 115.198760 2PiTHz 611.571472 cm-1 75.825226 meV

|    | X         | Y         | Z        | dx       | dy        | dz       |
|----|-----------|-----------|----------|----------|-----------|----------|
| Li | 3.769818  | 9.645336  | 4.001386 | 0.046730 | -0.046678 | 0.018165 |
| Li | -1.316675 | 4.156264  | 2.365404 | 0.046645 | -0.046589 | 0.018213 |
| Li | -3.471104 | 2.744536  | 5.548798 | 0.046721 | 0.046646  | 0.018184 |
| Li | 5.924247  | 11.057064 | 0.817991 | 0.046671 | 0.046626  | 0.018202 |

|    |           |           |          |           |           |           |
|----|-----------|-----------|----------|-----------|-----------|-----------|
| Na | 2.049025  | 6.784862  | 1.629696 | -0.001071 | -0.006326 | 0.000592  |
| Na | 0.404117  | 7.016739  | 4.737094 | -0.001071 | -0.006312 | 0.000579  |
| Na | 2.558546  | 13.685662 | 1.553699 | -0.001071 | 0.006318  | 0.000579  |
| Na | -0.105403 | 0.115939  | 4.813091 | -0.001072 | 0.006319  | 0.000591  |
| B  | 4.155007  | 8.978944  | 1.168663 | 0.006753  | -0.003232 | -0.017536 |
| B  | -1.701865 | 4.822656  | 5.198127 | 0.006777  | -0.003248 | -0.017441 |
| B  | 0.452564  | 2.078144  | 2.014732 | 0.006771  | 0.003224  | -0.017465 |
| B  | 2.000578  | 11.723457 | 4.352058 | 0.006753  | 0.003246  | -0.017515 |
| B  | -2.733891 | 11.746082 | 5.839177 | -0.016975 | -0.014361 | 0.016016  |
| B  | 5.187034  | 2.055518  | 0.527613 | -0.016929 | -0.014320 | 0.015990  |
| B  | 3.032605  | 4.845282  | 3.711007 | -0.016918 | 0.014300  | 0.015987  |
| B  | -0.579463 | 8.956318  | 2.655782 | -0.016994 | 0.014390  | 0.016021  |
| B  | -0.983708 | 0.054306  | 1.827988 | 0.013164  | 0.000127  | 0.004696  |
| B  | 3.436850  | 13.747295 | 4.538802 | 0.013200  | 0.000114  | 0.004718  |
| B  | 5.591279  | 6.955106  | 1.355407 | 0.013216  | -0.000127 | 0.004717  |
| B  | -3.138137 | 6.846495  | 5.011383 | 0.013154  | -0.000112 | 0.004697  |
| Si | 0.631772  | 3.486686  | 4.508512 | -0.002172 | -0.002537 | -0.010112 |
| Si | 1.821370  | 10.314915 | 1.858278 | -0.002153 | -0.002502 | -0.010126 |
| Si | -0.333059 | 10.387486 | 5.041673 | -0.002189 | 0.002514  | -0.010138 |
| Si | 2.786201  | 3.414115  | 1.325117 | -0.002130 | 0.002518  | -0.010098 |
| O  | 0.061445  | 3.072947  | 3.041906 | -0.061406 | 0.023764  | -0.010849 |
| O  | 2.391697  | 10.728653 | 3.324884 | -0.061482 | 0.023753  | -0.010830 |
| O  | 4.546126  | 9.973747  | 0.141489 | -0.061448 | -0.023727 | -0.010840 |
| O  | -2.092984 | 3.827853  | 6.225301 | -0.061469 | -0.023801 | -0.010834 |
| O  | 2.197450  | 3.933608  | 4.519003 | 0.013336  | -0.020251 | 0.035130  |
| O  | 0.255692  | 9.867992  | 1.847787 | 0.013360  | -0.020314 | 0.035163  |
| O  | -1.898737 | 10.834409 | 5.031182 | 0.013373  | 0.020323  | 0.035194  |
| O  | 4.351879  | 2.967192  | 1.335608 | 0.013331  | 0.020244  | 0.035106  |
| O  | -0.212316 | 4.798696  | 5.055280 | 0.036217  | 0.048342  | -0.002181 |
| O  | 2.665458  | 9.002905  | 1.311510 | 0.036275  | 0.048376  | -0.002123 |
| O  | 0.511030  | 11.699496 | 4.494905 | 0.036261  | -0.048391 | -0.002141 |
| O  | 1.942113  | 2.102105  | 1.871885 | 0.036211  | -0.048308 | -0.002168 |
| O  | 0.525580  | 2.169271  | 5.472081 | 0.015987  | -0.019388 | -0.009910 |
| O  | 1.927562  | 11.632329 | 0.894709 | 0.016029  | -0.019419 | -0.009933 |
| O  | -0.226867 | 9.070071  | 4.078104 | 0.016044  | 0.019392  | -0.009920 |
| O  | 2.680009  | 4.731529  | 2.288686 | 0.015968  | 0.019409  | -0.009923 |

|   |           |           |          |           |           |           |
|---|-----------|-----------|----------|-----------|-----------|-----------|
| O | 0.058846  | 0.698526  | 2.444964 | 0.008127  | 0.017276  | -0.004012 |
| O | 2.394296  | 13.103075 | 3.921826 | 0.008133  | 0.017342  | -0.004034 |
| O | 4.548725  | 7.599326  | 0.738431 | 0.008137  | -0.017342 | -0.004015 |
| O | -2.095583 | 6.202275  | 5.628359 | 0.008126  | -0.017285 | -0.004037 |
| O | -2.459230 | 13.184059 | 5.445139 | -0.003279 | -0.026032 | 0.000398  |
| O | 4.912372  | 0.617542  | 0.921651 | -0.003298 | -0.025988 | 0.000388  |
| O | 2.757943  | 6.283259  | 4.105046 | -0.003297 | 0.025978  | 0.000387  |
| O | -0.304801 | 7.518342  | 2.261744 | -0.003288 | 0.026057  | 0.000402  |
| O | -0.175430 | 2.374756  | 0.744070 | -0.015022 | 0.002150  | 0.007641  |
| O | 2.628573  | 11.426844 | 5.622720 | -0.015033 | 0.002141  | 0.007591  |
| O | 4.783002  | 9.275557  | 2.439325 | -0.015083 | -0.002149 | 0.007625  |
| O | -2.329859 | 4.526044  | 3.927465 | -0.014970 | -0.002136 | 0.007606  |
| O | -1.223866 | 12.517207 | 2.155216 | -0.007647 | 0.000201  | -0.010463 |
| O | 3.677009  | 1.284394  | 4.211574 | -0.007668 | 0.000193  | -0.010478 |
| O | 5.831438  | 5.616407  | 1.028179 | -0.007665 | -0.000218 | -0.010484 |
| O | -3.378295 | 8.185194  | 5.338611 | -0.007654 | -0.000174 | -0.010455 |
| H | -0.637445 | 12.195109 | 2.878812 | -0.054445 | -0.021540 | 0.017170  |
| H | 3.090587  | 1.606491  | 3.487978 | -0.054547 | -0.021636 | 0.017180  |
| H | 5.245016  | 5.294309  | 0.304583 | -0.054509 | 0.021623  | 0.017140  |
| H | -2.791874 | 8.507292  | 6.062207 | -0.054465 | 0.021570  | 0.017188  |

84 f = 18.157304 THz 114.085705 2PiTHz 605.662443 cm-1 75.092599 meV

|    | X         | Y         | Z        | dx        | dy        | dz        |
|----|-----------|-----------|----------|-----------|-----------|-----------|
| Li | 3.769818  | 9.645336  | 4.001386 | -0.044570 | 0.047995  | -0.005578 |
| Li | -1.316675 | 4.156264  | 2.365404 | 0.044635  | -0.048056 | 0.005612  |
| Li | -3.471104 | 2.744536  | 5.548798 | 0.044635  | 0.048054  | 0.005618  |
| Li | 5.924247  | 11.057064 | 0.817991 | -0.044574 | -0.047986 | -0.005589 |
| Na | 2.049025  | 6.784862  | 1.629696 | 0.001673  | 0.001641  | 0.000480  |
| Na | 0.404117  | 7.016739  | 4.737094 | -0.001676 | -0.001648 | -0.000473 |
| Na | 2.558546  | 13.685662 | 1.553699 | -0.001675 | 0.001648  | -0.000473 |
| Na | -0.105403 | 0.115939  | 4.813091 | 0.001674  | -0.001637 | 0.000480  |
| B  | 4.155007  | 8.978944  | 1.168663 | -0.003048 | -0.000009 | 0.012564  |
| B  | -1.701865 | 4.822656  | 5.198127 | 0.003048  | 0.000011  | -0.012609 |
| B  | 0.452564  | 2.078144  | 2.014732 | 0.003042  | -0.000026 | -0.012600 |
| B  | 2.000578  | 11.723457 | 4.352058 | -0.003041 | 0.000003  | 0.012570  |



|    |           |           |          |           |           |           |
|----|-----------|-----------|----------|-----------|-----------|-----------|
| B  | -2.733891 | 11.746082 | 5.839177 | 0.017222  | 0.016799  | -0.013245 |
| B  | 5.187034  | 2.055518  | 0.527613 | -0.017245 | -0.016812 | 0.013258  |
| B  | 3.032605  | 4.845282  | 3.711007 | -0.017261 | 0.016830  | 0.013265  |
| B  | -0.579463 | 8.956318  | 2.655782 | 0.017221  | -0.016800 | -0.013239 |
| B  | -0.983708 | 0.054306  | 1.827988 | 0.018727  | -0.004364 | -0.001731 |
| B  | 3.436850  | 13.747295 | 4.538802 | -0.018720 | 0.004359  | 0.001733  |
| B  | 5.591279  | 6.955106  | 1.355407 | -0.018713 | -0.004355 | 0.001736  |
| B  | -3.138137 | 6.846495  | 5.011383 | 0.018744  | 0.004367  | -0.001725 |
| Si | 0.631772  | 3.486686  | 4.508512 | -0.002528 | -0.000006 | -0.010751 |
| Si | 1.821370  | 10.314915 | 1.858278 | 0.002527  | -0.000003 | 0.010747  |
| Si | -0.333059 | 10.387486 | 5.041673 | 0.002529  | 0.000006  | 0.010740  |
| Si | 2.786201  | 3.414115  | 1.325117 | -0.002523 | -0.000001 | -0.010758 |
| O  | 0.061445  | 3.072947  | 3.041906 | -0.060712 | 0.022919  | -0.009135 |
| O  | 2.391697  | 10.728653 | 3.324884 | 0.060649  | -0.022878 | 0.009109  |
| O  | 4.546126  | 9.973747  | 0.141489 | 0.060652  | 0.022882  | 0.009107  |
| O  | -2.092984 | 3.827853  | 6.225301 | -0.060734 | -0.022915 | -0.009130 |
| O  | 2.197450  | 3.933608  | 4.519003 | 0.017489  | -0.024552 | 0.040100  |
| O  | 0.255692  | 9.867992  | 1.847787 | -0.017468 | 0.024517  | -0.040060 |
| O  | -1.898737 | 10.834409 | 5.031182 | -0.017476 | -0.024529 | -0.040063 |
| O  | 4.351879  | 2.967192  | 1.335608 | 0.017494  | 0.024544  | 0.040104  |
| O  | -0.212316 | 4.798696  | 5.055280 | 0.034591  | 0.046761  | -0.002895 |
| O  | 2.665458  | 9.002905  | 1.311510 | -0.034541 | -0.046697 | 0.002900  |
| O  | 0.511030  | 11.699496 | 4.494905 | -0.034532 | 0.046693  | 0.002909  |
| O  | 1.942113  | 2.102105  | 1.871885 | 0.034569  | -0.046745 | -0.002894 |
| O  | 0.525580  | 2.169271  | 5.472081 | 0.016290  | -0.021142 | -0.013142 |
| O  | 1.927562  | 11.632329 | 0.894709 | -0.016271 | 0.021121  | 0.013132  |
| O  | -0.226867 | 9.070071  | 4.078104 | -0.016264 | -0.021124 | 0.013139  |
| O  | 2.680009  | 4.731529  | 2.288686 | 0.016296  | 0.021133  | -0.013136 |
| O  | 0.058846  | 0.698526  | 2.444964 | 0.007559  | 0.018303  | -0.001046 |
| O  | 2.394296  | 13.103075 | 3.921826 | -0.007562 | -0.018288 | 0.001033  |
| O  | 4.548725  | 7.599326  | 0.738431 | -0.007561 | 0.018280  | 0.001033  |
| O  | -2.095583 | 6.202275  | 5.628359 | 0.007564  | -0.018327 | -0.001049 |
| O  | -2.459230 | 13.184059 | 5.445139 | 0.005213  | 0.024206  | -0.000358 |
| O  | 4.912372  | 0.617542  | 0.921651 | -0.005204 | -0.024213 | 0.000363  |
| O  | 2.757943  | 6.283259  | 4.105046 | -0.005207 | 0.024238  | 0.000370  |
| O  | -0.304801 | 7.518342  | 2.261744 | 0.005222  | -0.024205 | -0.000354 |

|   |           |           |          |           |           |           |
|---|-----------|-----------|----------|-----------|-----------|-----------|
| O | -0.175430 | 2.374756  | 0.744070 | -0.017298 | 0.001652  | 0.009708  |
| O | 2.628573  | 11.426844 | 5.622720 | 0.017274  | -0.001650 | -0.009704 |
| O | 4.783002  | 9.275557  | 2.439325 | 0.017271  | 0.001652  | -0.009707 |
| O | -2.329859 | 4.526044  | 3.927465 | -0.017307 | -0.001648 | 0.009708  |
| O | -1.223866 | 12.517207 | 2.155216 | -0.006466 | 0.005536  | -0.004337 |
| O | 3.677009  | 1.284394  | 4.211574 | 0.006467  | -0.005539 | 0.004330  |
| O | 5.831438  | 5.616407  | 1.028179 | 0.006458  | 0.005541  | 0.004327  |
| O | -3.378295 | 8.185194  | 5.338611 | -0.006477 | -0.005537 | -0.004346 |
| H | -0.637445 | 12.195109 | 2.878812 | -0.026671 | -0.017273 | 0.001426  |
| H | 3.090587  | 1.606491  | 3.487978 | 0.026598  | 0.017256  | -0.001380 |
| H | 5.245016  | 5.294309  | 0.304583 | 0.026603  | -0.017236 | -0.001403 |
| H | -2.791874 | 8.507292  | 6.062207 | -0.026706 | 0.017299  | 0.001425  |

85 f = 17.995664 THz 113.070089 2PiTHz 600.270707 cm-1 74.424109 meV

|    | X         | Y         | Z        | dx        | dy        | dz        |
|----|-----------|-----------|----------|-----------|-----------|-----------|
| Li | 3.769818  | 9.645336  | 4.001386 | -0.033242 | 0.022366  | 0.008163  |
| Li | -1.316675 | 4.156264  | 2.365404 | 0.033149  | -0.022361 | -0.008174 |
| Li | -3.471104 | 2.744536  | 5.548798 | -0.033152 | -0.022341 | 0.008186  |
| Li | 5.924247  | 11.057064 | 0.817991 | 0.033252  | 0.022407  | -0.008146 |
| Na | 2.049025  | 6.784862  | 1.629696 | 0.000072  | 0.004247  | 0.000100  |
| Na | 0.404117  | 7.016739  | 4.737094 | -0.000069 | -0.004249 | -0.000098 |
| Na | 2.558546  | 13.685662 | 1.553699 | 0.000069  | -0.004247 | 0.000098  |
| Na | -0.105403 | 0.115939  | 4.813091 | -0.000073 | 0.004250  | -0.000100 |
| B  | 4.155007  | 8.978944  | 1.168663 | -0.012628 | 0.022877  | 0.030923  |
| B  | -1.701865 | 4.822656  | 5.198127 | 0.012618  | -0.022838 | -0.030878 |
| B  | 0.452564  | 2.078144  | 2.014732 | -0.012626 | -0.022857 | 0.030876  |
| B  | 2.000578  | 11.723457 | 4.352058 | 0.012620  | 0.022864  | -0.030933 |
| B  | -2.733891 | 11.746082 | 5.839177 | -0.034880 | -0.036441 | 0.008601  |
| B  | 5.187034  | 2.055518  | 0.527613 | 0.034810  | 0.036375  | -0.008581 |
| B  | 3.032605  | 4.845282  | 3.711007 | -0.034802 | 0.036382  | 0.008582  |
| B  | -0.579463 | 8.956318  | 2.655782 | 0.034885  | -0.036434 | -0.008598 |
| B  | -0.983708 | 0.054306  | 1.827988 | -0.032842 | -0.003261 | -0.016873 |
| B  | 3.436850  | 13.747295 | 4.538802 | 0.032865  | 0.003266  | 0.016914  |
| B  | 5.591279  | 6.955106  | 1.355407 | -0.032858 | 0.003280  | -0.016906 |
| B  | -3.138137 | 6.846495  | 5.011383 | 0.032837  | -0.003254 | 0.016882  |

|    |           |           |          |           |           |           |
|----|-----------|-----------|----------|-----------|-----------|-----------|
| Si | 0.631772  | 3.486686  | 4.508512 | -0.001888 | -0.006159 | 0.010803  |
| Si | 1.821370  | 10.314915 | 1.858278 | 0.001874  | 0.006167  | -0.010820 |
| Si | -0.333059 | 10.387486 | 5.041673 | -0.001883 | 0.006162  | 0.010815  |
| Si | 2.786201  | 3.414115  | 1.325117 | 0.001880  | -0.006163 | -0.010809 |
| O  | 0.061445  | 3.072947  | 3.041906 | 0.007304  | 0.030821  | -0.005239 |
| O  | 2.391697  | 10.728653 | 3.324884 | -0.007292 | -0.030869 | 0.005232  |
| O  | 4.546126  | 9.973747  | 0.141489 | 0.007255  | -0.030880 | -0.005241 |
| O  | -2.092984 | 3.827853  | 6.225301 | -0.007313 | 0.030823  | 0.005234  |
| O  | 2.197450  | 3.933608  | 4.519003 | -0.005913 | -0.018519 | -0.006011 |
| O  | 0.255692  | 9.867992  | 1.847787 | 0.005922  | 0.018548  | 0.006036  |
| O  | -1.898737 | 10.834409 | 5.031182 | -0.005899 | 0.018572  | -0.005985 |
| O  | 4.351879  | 2.967192  | 1.335608 | 0.005926  | -0.018508 | 0.006037  |
| O  | -0.212316 | 4.798696  | 5.055280 | 0.039531  | 0.014691  | 0.007670  |
| O  | 2.665458  | 9.002905  | 1.311510 | -0.039556 | -0.014663 | -0.007695 |
| O  | 0.511030  | 11.699496 | 4.494905 | 0.039565  | -0.014692 | 0.007694  |
| O  | 1.942113  | 2.102105  | 1.871885 | -0.039531 | 0.014680  | -0.007667 |
| O  | 0.525580  | 2.169271  | 5.472081 | -0.014323 | -0.012770 | -0.008398 |
| O  | 1.927562  | 11.632329 | 0.894709 | 0.014369  | 0.012749  | 0.008390  |
| O  | -0.226867 | 9.070071  | 4.078104 | -0.014360 | 0.012784  | -0.008415 |
| O  | 2.680009  | 4.731529  | 2.288686 | 0.014326  | -0.012749 | 0.008382  |
| O  | 0.058846  | 0.698526  | 2.444964 | -0.009476 | -0.043384 | -0.007035 |
| O  | 2.394296  | 13.103075 | 3.921826 | 0.009494  | 0.043429  | 0.007051  |
| O  | 4.548725  | 7.599326  | 0.738431 | -0.009492 | 0.043418  | -0.007054 |
| O  | -2.095583 | 6.202275  | 5.628359 | 0.009473  | -0.043387 | 0.007032  |
| O  | -2.459230 | 13.184059 | 5.445139 | -0.008245 | -0.051678 | 0.008944  |
| O  | 4.912372  | 0.617542  | 0.921651 | 0.008238  | 0.051598  | -0.008951 |
| O  | 2.757943  | 6.283259  | 4.105046 | -0.008228 | 0.051600  | 0.008950  |
| O  | -0.304801 | 7.518342  | 2.261744 | 0.008259  | -0.051680 | -0.008937 |
| O  | -0.175430 | 2.374756  | 0.744070 | 0.031964  | -0.005451 | 0.004427  |
| O  | 2.628573  | 11.426844 | 5.622720 | -0.032030 | 0.005469  | -0.004437 |
| O  | 4.783002  | 9.275557  | 2.439325 | 0.032038  | 0.005462  | 0.004423  |
| O  | -2.329859 | 4.526044  | 3.927465 | -0.031961 | -0.005458 | -0.004431 |
| O  | -1.223866 | 12.517207 | 2.155216 | 0.016182  | -0.004769 | 0.019055  |
| O  | 3.677009  | 1.284394  | 4.211574 | -0.016200 | 0.004780  | -0.019095 |
| O  | 5.831438  | 5.616407  | 1.028179 | 0.016184  | 0.004790  | 0.019087  |
| O  | -3.378295 | 8.185194  | 5.338611 | -0.016185 | -0.004766 | -0.019056 |

|   |           |           |          |           |           |           |
|---|-----------|-----------|----------|-----------|-----------|-----------|
| H | -0.637445 | 12.195109 | 2.878812 | 0.080273  | 0.038099  | -0.012281 |
| H | 3.090587  | 1.606491  | 3.487978 | -0.080475 | -0.038178 | 0.012340  |
| H | 5.245016  | 5.294309  | 0.304583 | 0.080428  | -0.038148 | -0.012333 |
| H | -2.791874 | 8.507292  | 6.062207 | -0.080289 | 0.038112  | 0.012284  |

86 f = 17.851447 THz 112.163952 2PiTHz 595.460172 cm-1 73.827679 meV

|    | X         | Y         | Z        | dx        | dy        | dz        |
|----|-----------|-----------|----------|-----------|-----------|-----------|
| Li | 3.769818  | 9.645336  | 4.001386 | 0.025392  | -0.010212 | 0.023478  |
| Li | -1.316675 | 4.156264  | 2.365404 | 0.025384  | -0.010195 | 0.023456  |
| Li | -3.471104 | 2.744536  | 5.548798 | -0.025438 | -0.010209 | -0.023500 |
| Li | 5.924247  | 11.057064 | 0.817991 | -0.025355 | -0.010206 | -0.023465 |
| Na | 2.049025  | 6.784862  | 1.629696 | -0.002747 | 0.001141  | -0.000547 |
| Na | 0.404117  | 7.016739  | 4.737094 | -0.002751 | 0.001145  | -0.000555 |
| Na | 2.558546  | 13.685662 | 1.553699 | 0.002751  | 0.001139  | 0.000555  |
| Na | -0.105403 | 0.115939  | 4.813091 | 0.002748  | 0.001147  | 0.000548  |
| B  | 4.155007  | 8.978944  | 1.168663 | 0.007335  | -0.029939 | -0.033509 |
| B  | -1.701865 | 4.822656  | 5.198127 | 0.007336  | -0.029961 | -0.033532 |
| B  | 0.452564  | 2.078144  | 2.014732 | -0.007359 | -0.029987 | 0.033552  |
| B  | 2.000578  | 11.723457 | 4.352058 | -0.007321 | -0.029925 | 0.033501  |
| B  | -2.733891 | 11.746082 | 5.839177 | 0.031828  | 0.035348  | -0.017762 |
| B  | 5.187034  | 2.055518  | 0.527613 | 0.031898  | 0.035405  | -0.017814 |
| B  | 3.032605  | 4.845282  | 3.711007 | -0.031892 | 0.035383  | 0.017785  |
| B  | -0.579463 | 8.956318  | 2.655782 | -0.031841 | 0.035369  | 0.017782  |
| B  | -0.983708 | 0.054306  | 1.827988 | -0.032011 | -0.003929 | -0.018929 |
| B  | 3.436850  | 13.747295 | 4.538802 | -0.031929 | -0.003927 | -0.018904 |
| B  | 5.591279  | 6.955106  | 1.355407 | 0.031947  | -0.003930 | 0.018906  |
| B  | -3.138137 | 6.846495  | 5.011383 | 0.031987  | -0.003927 | 0.018923  |
| Si | 0.631772  | 3.486686  | 4.508512 | -0.003836 | -0.001536 | 0.008550  |
| Si | 1.821370  | 10.314915 | 1.858278 | -0.003826 | -0.001528 | 0.008535  |
| Si | -0.333059 | 10.387486 | 5.041673 | 0.003822  | -0.001526 | -0.008541 |
| Si | 2.786201  | 3.414115  | 1.325117 | 0.003842  | -0.001539 | -0.008549 |
| O  | 0.061445  | 3.072947  | 3.041906 | 0.003149  | 0.029614  | -0.003081 |
| O  | 2.391697  | 10.728653 | 3.324884 | 0.003102  | 0.029593  | -0.003082 |
| O  | 4.546126  | 9.973747  | 0.141489 | -0.003115 | 0.029589  | 0.003079  |
| O  | -2.092984 | 3.827853  | 6.225301 | -0.003119 | 0.029630  | 0.003087  |

|   |           |           |          |           |           |           |
|---|-----------|-----------|----------|-----------|-----------|-----------|
| O | 2.197450  | 3.933608  | 4.519003 | -0.004314 | -0.020122 | -0.008793 |
| O | 0.255692  | 9.867992  | 1.847787 | -0.004333 | -0.020071 | -0.008842 |
| O | -1.898737 | 10.834409 | 5.031182 | 0.004323  | -0.020070 | 0.008815  |
| O | 4.351879  | 2.967192  | 1.335608 | 0.004332  | -0.020115 | 0.008828  |
| O | -0.212316 | 4.798696  | 5.055280 | 0.025776  | 0.013105  | 0.008309  |
| O | 2.665458  | 9.002905  | 1.311510 | 0.025739  | 0.013093  | 0.008291  |
| O | 0.511030  | 11.699496 | 4.494905 | -0.025720 | 0.013084  | -0.008287 |
| O | 1.942113  | 2.102105  | 1.871885 | -0.025797 | 0.013122  | -0.008309 |
| O | 0.525580  | 2.169271  | 5.472081 | -0.019916 | -0.019217 | -0.023110 |
| O | 1.927562  | 11.632329 | 0.894709 | -0.019890 | -0.019198 | -0.023074 |
| O | -0.226867 | 9.070071  | 4.078104 | 0.019902  | -0.019227 | 0.023101  |
| O | 2.680009  | 4.731529  | 2.288686 | 0.019903  | -0.019181 | 0.023071  |
| O | 0.058846  | 0.698526  | 2.444964 | -0.007424 | -0.049533 | 0.004194  |
| O | 2.394296  | 13.103075 | 3.921826 | -0.007403 | -0.049432 | 0.004184  |
| O | 4.548725  | 7.599326  | 0.738431 | 0.007408  | -0.049457 | -0.004189 |
| O | -2.095583 | 6.202275  | 5.628359 | 0.007417  | -0.049494 | -0.004178 |
| O | -2.459230 | 13.184059 | 5.445139 | 0.000740  | 0.047863  | -0.010268 |
| O | 4.912372  | 0.617542  | 0.921651 | 0.000759  | 0.047973  | -0.010289 |
| O | 2.757943  | 6.283259  | 4.105046 | -0.000747 | 0.047941  | 0.010277  |
| O | -0.304801 | 7.518342  | 2.261744 | -0.000757 | 0.047899  | 0.010268  |
| O | -0.175430 | 2.374756  | 0.744070 | 0.024374  | 0.001891  | 0.014216  |
| O | 2.628573  | 11.426844 | 5.622720 | 0.024335  | 0.001889  | 0.014205  |
| O | 4.783002  | 9.275557  | 2.439325 | -0.024344 | 0.001889  | -0.014199 |
| O | -2.329859 | 4.526044  | 3.927465 | -0.024383 | 0.001887  | -0.014209 |
| O | -1.223866 | 12.517207 | 2.155216 | 0.013648  | -0.002510 | 0.020348  |
| O | 3.677009  | 1.284394  | 4.211574 | 0.013613  | -0.002503 | 0.020315  |
| O | 5.831438  | 5.616407  | 1.028179 | -0.013613 | -0.002513 | -0.020314 |
| O | -3.378295 | 8.185194  | 5.338611 | -0.013637 | -0.002510 | -0.020338 |
| H | -0.637445 | 12.195109 | 2.878812 | 0.102919  | 0.051727  | -0.025672 |
| H | 3.090587  | 1.606491  | 3.487978 | 0.102770  | 0.051627  | -0.025660 |
| H | 5.245016  | 5.294309  | 0.304583 | -0.102799 | 0.051646  | 0.025670  |
| H | -2.791874 | 8.507292  | 6.062207 | -0.102854 | 0.051688  | 0.025656  |

87 f = 17.703343 THz 111.233387 2PiTHz 590.519953 cm-1 73.215169  
meV

X Y Z dx dy dz

|    |           |           |          |           |           |           |
|----|-----------|-----------|----------|-----------|-----------|-----------|
| Li | 3.769818  | 9.645336  | 4.001386 | 0.040424  | 0.016167  | 0.046183  |
| Li | -1.316675 | 4.156264  | 2.365404 | 0.040422  | 0.016130  | 0.046125  |
| Li | -3.471104 | 2.744536  | 5.548798 | 0.040372  | -0.016179 | 0.046161  |
| Li | 5.924247  | 11.057064 | 0.817991 | 0.040464  | -0.016122 | 0.046161  |
| Na | 2.049025  | 6.784862  | 1.629696 | -0.002635 | 0.005680  | -0.001624 |
| Na | 0.404117  | 7.016739  | 4.737094 | -0.002638 | 0.005679  | -0.001625 |
| Na | 2.558546  | 13.685662 | 1.553699 | -0.002637 | -0.005683 | -0.001625 |
| Na | -0.105403 | 0.115939  | 4.813091 | -0.002634 | -0.005676 | -0.001624 |
| B  | 4.155007  | 8.978944  | 1.168663 | 0.022821  | -0.023185 | -0.014906 |
| B  | -1.701865 | 4.822656  | 5.198127 | 0.022824  | -0.023159 | -0.014928 |
| B  | 0.452564  | 2.078144  | 2.014732 | 0.022814  | 0.023167  | -0.014912 |
| B  | 2.000578  | 11.723457 | 4.352058 | 0.022837  | 0.023173  | -0.014916 |
| B  | -2.733891 | 11.746082 | 5.839177 | -0.003375 | -0.016393 | 0.025139  |
| B  | 5.187034  | 2.055518  | 0.527613 | -0.003374 | -0.016382 | 0.025146  |
| B  | 3.032605  | 4.845282  | 3.711007 | -0.003394 | 0.016393  | 0.025136  |
| B  | -0.579463 | 8.956318  | 2.655782 | -0.003369 | 0.016388  | 0.025156  |
| B  | -0.983708 | 0.054306  | 1.827988 | 0.014075  | -0.000595 | 0.005036  |
| B  | 3.436850  | 13.747295 | 4.538802 | 0.014081  | -0.000584 | 0.005037  |
| B  | 5.591279  | 6.955106  | 1.355407 | 0.014087  | 0.000598  | 0.005027  |
| B  | -3.138137 | 6.846495  | 5.011383 | 0.014080  | 0.000579  | 0.005042  |
| Si | 0.631772  | 3.486686  | 4.508512 | -0.002480 | -0.008680 | -0.000446 |
| Si | 1.821370  | 10.314915 | 1.858278 | -0.002498 | -0.008692 | -0.000442 |
| Si | -0.333059 | 10.387486 | 5.041673 | -0.002481 | 0.008699  | -0.000441 |
| Si | 2.786201  | 3.414115  | 1.325117 | -0.002498 | 0.008677  | -0.000452 |
| O  | 0.061445  | 3.072947  | 3.041906 | -0.003701 | 0.003328  | -0.002801 |
| O  | 2.391697  | 10.728653 | 3.324884 | -0.003707 | 0.003334  | -0.002804 |
| O  | 4.546126  | 9.973747  | 0.141489 | -0.003730 | -0.003355 | -0.002810 |
| O  | -2.092984 | 3.827853  | 6.225301 | -0.003683 | -0.003301 | -0.002798 |
| O  | 2.197450  | 3.933608  | 4.519003 | -0.030496 | 0.025187  | -0.055741 |
| O  | 0.255692  | 9.867992  | 1.847787 | -0.030504 | 0.025201  | -0.055770 |
| O  | -1.898737 | 10.834409 | 5.031182 | -0.030519 | -0.025218 | -0.055765 |
| O  | 4.351879  | 2.967192  | 1.335608 | -0.030484 | -0.025181 | -0.055726 |
| O  | -0.212316 | 4.798696  | 5.055280 | 0.012385  | -0.001358 | 0.000680  |
| O  | 2.665458  | 9.002905  | 1.311510 | 0.012377  | -0.001335 | 0.000658  |
| O  | 0.511030  | 11.699496 | 4.494905 | 0.012389  | 0.001352  | 0.000660  |
| O  | 1.942113  | 2.102105  | 1.871885 | 0.012365  | 0.001351  | 0.000678  |

|   |           |           |          |           |           |           |
|---|-----------|-----------|----------|-----------|-----------|-----------|
| O | 0.525580  | 2.169271  | 5.472081 | 0.004944  | 0.047304  | 0.045613  |
| O | 1.927562  | 11.632329 | 0.894709 | 0.004944  | 0.047334  | 0.045627  |
| O | -0.226867 | 9.070071  | 4.078104 | 0.004942  | -0.047338 | 0.045647  |
| O | 2.680009  | 4.731529  | 2.288686 | 0.004951  | -0.047317 | 0.045609  |
| O | 0.058846  | 0.698526  | 2.444964 | 0.000486  | 0.032603  | -0.012459 |
| O | 2.394296  | 13.103075 | 3.921826 | 0.000491  | 0.032610  | -0.012445 |
| O | 4.548725  | 7.599326  | 0.738431 | 0.000488  | -0.032624 | -0.012471 |
| O | -2.095583 | 6.202275  | 5.628359 | 0.000493  | -0.032600 | -0.012431 |
| O | -2.459230 | 13.184059 | 5.445139 | -0.009655 | -0.026700 | 0.013152  |
| O | 4.912372  | 0.617542  | 0.921651 | -0.009639 | -0.026684 | 0.013145  |
| O | 2.757943  | 6.283259  | 4.105046 | -0.009650 | 0.026708  | 0.013144  |
| O | -0.304801 | 7.518342  | 2.261744 | -0.009652 | 0.026698  | 0.013149  |
| O | -0.175430 | 2.374756  | 0.744070 | 0.008835  | -0.002002 | -0.002984 |
| O | 2.628573  | 11.426844 | 5.622720 | 0.008826  | -0.002006 | -0.002969 |
| O | 4.783002  | 9.275557  | 2.439325 | 0.008842  | 0.002011  | -0.002976 |
| O | -2.329859 | 4.526044  | 3.927465 | 0.008802  | 0.001995  | -0.002969 |
| O | -1.223866 | 12.517207 | 2.155216 | -0.011531 | -0.003040 | -0.013513 |
| O | 3.677009  | 1.284394  | 4.211574 | -0.011544 | -0.003035 | -0.013526 |
| O | 5.831438  | 5.616407  | 1.028179 | -0.011538 | 0.003038  | -0.013517 |
| O | -3.378295 | 8.185194  | 5.338611 | -0.011536 | 0.003028  | -0.013522 |
| H | -0.637445 | 12.195109 | 2.878812 | -0.051992 | -0.021992 | 0.009343  |
| H | 3.090587  | 1.606491  | 3.487978 | -0.052002 | -0.022008 | 0.009319  |
| H | 5.245016  | 5.294309  | 0.304583 | -0.052012 | 0.022005  | 0.009342  |
| H | -2.791874 | 8.507292  | 6.062207 | -0.051996 | 0.022003  | 0.009324  |

88 f = 17.524064 THz 110.106941 2PiTHz 584.539834 cm-1 72.473729  
meV

|    | X         | Y         | Z        | dx        | dy        | dz        |
|----|-----------|-----------|----------|-----------|-----------|-----------|
| Li | 3.769818  | 9.645336  | 4.001386 | 0.042271  | 0.008745  | 0.034503  |
| Li | -1.316675 | 4.156264  | 2.365404 | -0.042321 | -0.008756 | -0.034585 |
| Li | -3.471104 | 2.744536  | 5.548798 | -0.042312 | 0.008771  | -0.034536 |
| Li | 5.924247  | 11.057064 | 0.817991 | 0.042279  | -0.008738 | 0.034572  |
| Na | 2.049025  | 6.784862  | 1.629696 | 0.001421  | -0.005962 | 0.001047  |
| Na | 0.404117  | 7.016739  | 4.737094 | -0.001418 | 0.005948  | -0.001056 |
| Na | 2.558546  | 13.685662 | 1.553699 | -0.001421 | -0.005955 | -0.001056 |
| Na | -0.105403 | 0.115939  | 4.813091 | 0.001418  | 0.005955  | 0.001047  |

|    |           |           |          |           |           |           |
|----|-----------|-----------|----------|-----------|-----------|-----------|
| B  | 4.155007  | 8.978944  | 1.168663 | 0.023849  | -0.024739 | -0.014379 |
| B  | -1.701865 | 4.822656  | 5.198127 | -0.023894 | 0.024798  | 0.014413  |
| B  | 0.452564  | 2.078144  | 2.014732 | -0.023886 | -0.024774 | 0.014388  |
| B  | 2.000578  | 11.723457 | 4.352058 | 0.023864  | 0.024772  | -0.014415 |
| B  | -2.733891 | 11.746082 | 5.839177 | -0.005630 | -0.019571 | 0.024179  |
| B  | 5.187034  | 2.055518  | 0.527613 | 0.005628  | 0.019536  | -0.024183 |
| B  | 3.032605  | 4.845282  | 3.711007 | 0.005638  | -0.019555 | -0.024195 |
| B  | -0.579463 | 8.956318  | 2.655782 | -0.005621 | 0.019547  | 0.024165  |
| B  | -0.983708 | 0.054306  | 1.827988 | -0.014456 | -0.002794 | -0.008563 |
| B  | 3.436850  | 13.747295 | 4.538802 | 0.014486  | 0.002776  | 0.008567  |
| B  | 5.591279  | 6.955106  | 1.355407 | 0.014459  | -0.002779 | 0.008546  |
| B  | -3.138137 | 6.846495  | 5.011383 | -0.014477 | 0.002794  | -0.008573 |
| Si | 0.631772  | 3.486686  | 4.508512 | 0.005819  | 0.006786  | -0.000332 |
| Si | 1.821370  | 10.314915 | 1.858278 | -0.005804 | -0.006773 | 0.000329  |
| Si | -0.333059 | 10.387486 | 5.041673 | -0.005820 | 0.006774  | 0.000331  |
| Si | 2.786201  | 3.414115  | 1.325117 | 0.005807  | -0.006785 | -0.000328 |
| O  | 0.061445  | 3.072947  | 3.041906 | 0.006690  | -0.003966 | 0.001433  |
| O  | 2.391697  | 10.728653 | 3.324884 | -0.006667 | 0.003930  | -0.001425 |
| O  | 4.546126  | 9.973747  | 0.141489 | -0.006668 | -0.003960 | -0.001432 |
| O  | -2.092984 | 3.827853  | 6.225301 | 0.006689  | 0.003943  | 0.001428  |
| O  | 2.197450  | 3.933608  | 4.519003 | 0.027189  | -0.018015 | 0.052491  |
| O  | 0.255692  | 9.867992  | 1.847787 | -0.027160 | 0.018006  | -0.052459 |
| O  | -1.898737 | 10.834409 | 5.031182 | -0.027169 | -0.017993 | -0.052459 |
| O  | 4.351879  | 2.967192  | 1.335608 | 0.027182  | 0.018024  | 0.052477  |
| O  | -0.212316 | 4.798696  | 5.055280 | -0.016385 | -0.002131 | -0.001032 |
| O  | 2.665458  | 9.002905  | 1.311510 | 0.016356  | 0.002116  | 0.001032  |
| O  | 0.511030  | 11.699496 | 4.494905 | 0.016369  | -0.002118 | 0.001041  |
| O  | 1.942113  | 2.102105  | 1.871885 | -0.016374 | 0.002125  | -0.001024 |
| O  | 0.525580  | 2.169271  | 5.472081 | -0.008297 | -0.048493 | -0.046022 |
| O  | 1.927562  | 11.632329 | 0.894709 | 0.008310  | 0.048490  | 0.046025  |
| O  | -0.226867 | 9.070071  | 4.078104 | 0.008295  | -0.048481 | 0.046003  |
| O  | 2.680009  | 4.731529  | 2.288686 | -0.008310 | 0.048509  | -0.046045 |
| O  | 0.058846  | 0.698526  | 2.444964 | -0.002664 | -0.037913 | 0.013591  |
| O  | 2.394296  | 13.103075 | 3.921826 | 0.002655  | 0.037950  | -0.013604 |
| O  | 4.548725  | 7.599326  | 0.738431 | 0.002658  | -0.037896 | -0.013590 |
| O  | -2.095583 | 6.202275  | 5.628359 | -0.002661 | 0.037954  | 0.013603  |



|   |           |           |          |           |           |           |
|---|-----------|-----------|----------|-----------|-----------|-----------|
| O | -2.459230 | 13.184059 | 5.445139 | -0.013230 | -0.034374 | 0.008406  |
| O | 4.912372  | 0.617542  | 0.921651 | 0.013258  | 0.034382  | -0.008389 |
| O | 2.757943  | 6.283259  | 4.105046 | 0.013252  | -0.034409 | -0.008401 |
| O | -0.304801 | 7.518342  | 2.261744 | -0.013244 | 0.034349  | 0.008387  |
| O | -0.175430 | 2.374756  | 0.744070 | -0.006376 | 0.004190  | 0.001777  |
| O | 2.628573  | 11.426844 | 5.622720 | 0.006366  | -0.004202 | -0.001812 |
| O | 4.783002  | 9.275557  | 2.439325 | 0.006357  | 0.004195  | -0.001769 |
| O | -2.329859 | 4.526044  | 3.927465 | -0.006375 | -0.004195 | 0.001803  |
| O | -1.223866 | 12.517207 | 2.155216 | 0.011493  | -0.002166 | 0.010701  |
| O | 3.677009  | 1.284394  | 4.211574 | -0.011500 | 0.002164  | -0.010714 |
| O | 5.831438  | 5.616407  | 1.028179 | -0.011479 | -0.002178 | -0.010691 |
| O | -3.378295 | 8.185194  | 5.338611 | 0.011506  | 0.002160  | 0.010718  |
| H | -0.637445 | 12.195109 | 2.878812 | 0.044552  | 0.038261  | 0.003237  |
| H | 3.090587  | 1.606491  | 3.487978 | -0.044644 | -0.038311 | -0.003199 |
| H | 5.245016  | 5.294309  | 0.304583 | -0.044542 | 0.038249  | -0.003221 |
| H | -2.791874 | 8.507292  | 6.062207 | 0.044626  | -0.038299 | 0.003219  |

89 f = 17.168301 THz 107.871618 2PiTHz 572.672869 cm-1 71.002412 meV

|    | X         | Y         | Z        | dx        | dy        | dz        |
|----|-----------|-----------|----------|-----------|-----------|-----------|
| Li | 3.769818  | 9.645336  | 4.001386 | 0.023633  | -0.073935 | -0.052425 |
| Li | -1.316675 | 4.156264  | 2.365404 | -0.023562 | 0.073930  | 0.052373  |
| Li | -3.471104 | 2.744536  | 5.548798 | 0.023580  | 0.073894  | -0.052401 |
| Li | 5.924247  | 11.057064 | 0.817991 | -0.023612 | -0.073962 | 0.052389  |
| Na | 2.049025  | 6.784862  | 1.629696 | -0.000324 | 0.000134  | 0.001614  |
| Na | 0.404117  | 7.016739  | 4.737094 | 0.000329  | -0.000132 | -0.001601 |
| Na | 2.558546  | 13.685662 | 1.553699 | -0.000327 | -0.000134 | 0.001598  |
| Na | -0.105403 | 0.115939  | 4.813091 | 0.000326  | 0.000131  | -0.001616 |
| B  | 4.155007  | 8.978944  | 1.168663 | 0.021769  | 0.028899  | 0.011027  |
| B  | -1.701865 | 4.822656  | 5.198127 | -0.021746 | -0.028879 | -0.010982 |
| B  | 0.452564  | 2.078144  | 2.014732 | 0.021760  | -0.028878 | 0.011007  |
| B  | 2.000578  | 11.723457 | 4.352058 | -0.021759 | 0.028894  | -0.010986 |
| B  | -2.733891 | 11.746082 | 5.839177 | -0.004964 | 0.007502  | 0.024574  |
| B  | 5.187034  | 2.055518  | 0.527613 | 0.004920  | -0.007514 | -0.024532 |
| B  | 3.032605  | 4.845282  | 3.711007 | -0.004952 | -0.007504 | 0.024547  |
| B  | -0.579463 | 8.956318  | 2.655782 | 0.004935  | 0.007501  | -0.024564 |

|    |           |           |          |           |           |           |
|----|-----------|-----------|----------|-----------|-----------|-----------|
| B  | -0.983708 | 0.054306  | 1.827988 | -0.021391 | 0.014301  | 0.006271  |
| B  | 3.436850  | 13.747295 | 4.538802 | 0.021405  | -0.014305 | -0.006269 |
| B  | 5.591279  | 6.955106  | 1.355407 | -0.021418 | -0.014319 | 0.006263  |
| B  | -3.138137 | 6.846495  | 5.011383 | 0.021385  | 0.014289  | -0.006265 |
| Si | 0.631772  | 3.486686  | 4.508512 | -0.019093 | 0.018255  | -0.006298 |
| Si | 1.821370  | 10.314915 | 1.858278 | 0.019138  | -0.018248 | 0.006298  |
| Si | -0.333059 | 10.387486 | 5.041673 | -0.019117 | -0.018243 | -0.006312 |
| Si | 2.786201  | 3.414115  | 1.325117 | 0.019111  | 0.018257  | 0.006285  |
| O  | 0.061445  | 3.072947  | 3.041906 | 0.008492  | -0.017002 | 0.008559  |
| O  | 2.391697  | 10.728653 | 3.324884 | -0.008484 | 0.017025  | -0.008548 |
| O  | 4.546126  | 9.973747  | 0.141489 | 0.008536  | 0.017027  | 0.008553  |
| O  | -2.092984 | 3.827853  | 6.225301 | -0.008443 | -0.016989 | -0.008554 |
| O  | 2.197450  | 3.933608  | 4.519003 | 0.021116  | -0.045752 | 0.020255  |
| O  | 0.255692  | 9.867992  | 1.847787 | -0.021129 | 0.045787  | -0.020316 |
| O  | -1.898737 | 10.834409 | 5.031182 | 0.021104  | 0.045770  | 0.020252  |
| O  | 4.351879  | 2.967192  | 1.335608 | -0.021143 | -0.045773 | -0.020315 |
| O  | -0.212316 | 4.798696  | 5.055280 | -0.022939 | -0.000367 | 0.011588  |
| O  | 2.665458  | 9.002905  | 1.311510 | 0.022913  | 0.000288  | -0.011590 |
| O  | 0.511030  | 11.699496 | 4.494905 | -0.022919 | 0.000337  | 0.011593  |
| O  | 1.942113  | 2.102105  | 1.871885 | 0.022943  | -0.000331 | -0.011573 |
| O  | 0.525580  | 2.169271  | 5.472081 | -0.010859 | 0.009436  | -0.023371 |
| O  | 1.927562  | 11.632329 | 0.894709 | 0.010858  | -0.009368 | 0.023425  |
| O  | -0.226867 | 9.070071  | 4.078104 | -0.010873 | -0.009420 | -0.023399 |
| O  | 2.680009  | 4.731529  | 2.288686 | 0.010858  | 0.009381  | 0.023402  |
| O  | 0.058846  | 0.698526  | 2.444964 | 0.004597  | -0.026904 | 0.025278  |
| O  | 2.394296  | 13.103075 | 3.921826 | -0.004581 | 0.026910  | -0.025288 |
| O  | 4.548725  | 7.599326  | 0.738431 | 0.004589  | 0.026929  | 0.025294  |
| O  | -2.095583 | 6.202275  | 5.628359 | -0.004588 | -0.026901 | -0.025276 |
| O  | -2.459230 | 13.184059 | 5.445139 | 0.023048  | -0.004862 | 0.000990  |
| O  | 4.912372  | 0.617542  | 0.921651 | -0.023060 | 0.004820  | -0.000989 |
| O  | 2.757943  | 6.283259  | 4.105046 | 0.023042  | 0.004842  | 0.000984  |
| O  | -0.304801 | 7.518342  | 2.261744 | -0.023068 | -0.004852 | -0.001005 |
| O  | -0.175430 | 2.374756  | 0.744070 | -0.007740 | 0.019289  | 0.032495  |
| O  | 2.628573  | 11.426844 | 5.622720 | 0.007727  | -0.019307 | -0.032480 |
| O  | 4.783002  | 9.275557  | 2.439325 | -0.007757 | -0.019290 | 0.032541  |
| O  | -2.329859 | 4.526044  | 3.927465 | 0.007710  | 0.019301  | -0.032453 |

|   |           |           |          |           |           |           |
|---|-----------|-----------|----------|-----------|-----------|-----------|
| O | -1.223866 | 12.517207 | 2.155216 | 0.009943  | 0.010926  | -0.003241 |
| O | 3.677009  | 1.284394  | 4.211574 | -0.009965 | -0.010908 | 0.003230  |
| O | 5.831438  | 5.616407  | 1.028179 | 0.009974  | -0.010936 | -0.003240 |
| O | -3.378295 | 8.185194  | 5.338611 | -0.009942 | 0.010901  | 0.003223  |
| H | -0.637445 | 12.195109 | 2.878812 | 0.024673  | 0.036943  | -0.002715 |
| H | 3.090587  | 1.606491  | 3.487978 | -0.024720 | -0.036974 | 0.002698  |
| H | 5.245016  | 5.294309  | 0.304583 | 0.024710  | -0.037004 | -0.002695 |
| H | -2.791874 | 8.507292  | 6.062207 | -0.024700 | 0.036941  | 0.002706  |

90 f = 16.861711 THz 105.945257 2PiTHz 562.446133 cm-1 69.734458 meV

|    | X         | Y         | Z        | dx        | dy        | dz        |
|----|-----------|-----------|----------|-----------|-----------|-----------|
| Li | 3.769818  | 9.645336  | 4.001386 | -0.043188 | 0.028373  | 0.074255  |
| Li | -1.316675 | 4.156264  | 2.365404 | -0.043270 | 0.028383  | 0.074278  |
| Li | -3.471104 | 2.744536  | 5.548798 | 0.043228  | 0.028357  | -0.074286 |
| Li | 5.924247  | 11.057064 | 0.817991 | 0.043209  | 0.028377  | -0.074196 |
| Na | 2.049025  | 6.784862  | 1.629696 | -0.000317 | 0.003022  | -0.000267 |
| Na | 0.404117  | 7.016739  | 4.737094 | -0.000316 | 0.003017  | -0.000276 |
| Na | 2.558546  | 13.685662 | 1.553699 | 0.000314  | 0.003021  | 0.000275  |
| Na | -0.105403 | 0.115939  | 4.813091 | 0.000317  | 0.003020  | 0.000268  |
| B  | 4.155007  | 8.978944  | 1.168663 | -0.011545 | -0.011385 | -0.015363 |
| B  | -1.701865 | 4.822656  | 5.198127 | -0.011553 | -0.011354 | -0.015358 |
| B  | 0.452564  | 2.078144  | 2.014732 | 0.011553  | -0.011364 | 0.015359  |
| B  | 2.000578  | 11.723457 | 4.352058 | 0.011547  | -0.011367 | 0.015332  |
| B  | -2.733891 | 11.746082 | 5.839177 | -0.018060 | -0.009211 | -0.012002 |
| B  | 5.187034  | 2.055518  | 0.527613 | -0.018102 | -0.009215 | -0.011998 |
| B  | 3.032605  | 4.845282  | 3.711007 | 0.018103  | -0.009216 | 0.011990  |
| B  | -0.579463 | 8.956318  | 2.655782 | 0.018068  | -0.009219 | 0.012010  |
| B  | -0.983708 | 0.054306  | 1.827988 | -0.008779 | 0.016134  | 0.009292  |
| B  | 3.436850  | 13.747295 | 4.538802 | -0.008792 | 0.016110  | 0.009308  |
| B  | 5.591279  | 6.955106  | 1.355407 | 0.008799  | 0.016122  | -0.009286 |
| B  | -3.138137 | 6.846495  | 5.011383 | 0.008776  | 0.016130  | -0.009303 |
| Si | 0.631772  | 3.486686  | 4.508512 | -0.020296 | 0.015607  | -0.011488 |
| Si | 1.821370  | 10.314915 | 1.858278 | -0.020277 | 0.015597  | -0.011487 |
| Si | -0.333059 | 10.387486 | 5.041673 | 0.020256  | 0.015597  | 0.011494  |
| Si | 2.786201  | 3.414115  | 1.325117 | 0.020301  | 0.015607  | 0.011493  |

|   |           |           |          |           |           |           |
|---|-----------|-----------|----------|-----------|-----------|-----------|
| O | 0.061445  | 3.072947  | 3.041906 | -0.003229 | -0.006570 | 0.000700  |
| O | 2.391697  | 10.728653 | 3.324884 | -0.003222 | -0.006574 | 0.000698  |
| O | 4.546126  | 9.973747  | 0.141489 | 0.003214  | -0.006568 | -0.000701 |
| O | -2.092984 | 3.827853  | 6.225301 | 0.003235  | -0.006556 | -0.000695 |
| O | 2.197450  | 3.933608  | 4.519003 | 0.000242  | -0.007976 | 0.000395  |
| O | 0.255692  | 9.867992  | 1.847787 | 0.000244  | -0.007974 | 0.000393  |
| O | -1.898737 | 10.834409 | 5.031182 | -0.000258 | -0.007983 | -0.000403 |
| O | 4.351879  | 2.967192  | 1.335608 | -0.000236 | -0.007977 | -0.000381 |
| O | -0.212316 | 4.798696  | 5.055280 | -0.031751 | -0.013708 | 0.004519  |
| O | 2.665458  | 9.002905  | 1.311510 | -0.031707 | -0.013686 | 0.004542  |
| O | 0.511030  | 11.699496 | 4.494905 | 0.031704  | -0.013694 | -0.004538 |
| O | 1.942113  | 2.102105  | 1.871885 | 0.031765  | -0.013724 | -0.004513 |
| O | 0.525580  | 2.169271  | 5.472081 | -0.006203 | -0.006471 | -0.026621 |
| O | 1.927562  | 11.632329 | 0.894709 | -0.006193 | -0.006420 | -0.026582 |
| O | -0.226867 | 9.070071  | 4.078104 | 0.006208  | -0.006432 | 0.026598  |
| O | 2.680009  | 4.731529  | 2.288686 | 0.006196  | -0.006444 | 0.026602  |
| O | 0.058846  | 0.698526  | 2.444964 | 0.016468  | -0.020363 | 0.025724  |
| O | 2.394296  | 13.103075 | 3.921826 | 0.016448  | -0.020348 | 0.025702  |
| O | 4.548725  | 7.599326  | 0.738431 | -0.016451 | -0.020373 | -0.025713 |
| O | -2.095583 | 6.202275  | 5.628359 | -0.016477 | -0.020365 | -0.025724 |
| O | -2.459230 | 13.184059 | 5.445139 | -0.027372 | -0.025164 | -0.013082 |
| O | 4.912372  | 0.617542  | 0.921651 | -0.027398 | -0.025169 | -0.013104 |
| O | 2.757943  | 6.283259  | 4.105046 | 0.027404  | -0.025194 | 0.013100  |
| O | -0.304801 | 7.518342  | 2.261744 | 0.027388  | -0.025149 | 0.013106  |
| O | -0.175430 | 2.374756  | 0.744070 | -0.036834 | 0.020448  | 0.049236  |
| O | 2.628573  | 11.426844 | 5.622720 | -0.036763 | 0.020417  | 0.049159  |
| O | 4.783002  | 9.275557  | 2.439325 | 0.036795  | 0.020422  | -0.049203 |
| O | -2.329859 | 4.526044  | 3.927465 | 0.036827  | 0.020433  | -0.049240 |
| O | -1.223866 | 12.517207 | 2.155216 | 0.005420  | 0.018250  | 0.000206  |
| O | 3.677009  | 1.284394  | 4.211574 | 0.005423  | 0.018217  | 0.000218  |
| O | 5.831438  | 5.616407  | 1.028179 | -0.005431 | 0.018243  | -0.000229 |
| O | -3.378295 | 8.185194  | 5.338611 | -0.005414 | 0.018243  | -0.000204 |
| H | -0.637445 | 12.195109 | 2.878812 | 0.022893  | 0.007320  | -0.022086 |
| H | 3.090587  | 1.606491  | 3.487978 | 0.022890  | 0.007287  | -0.022075 |
| H | 5.245016  | 5.294309  | 0.304583 | -0.022937 | 0.007335  | 0.022084  |
| H | -2.791874 | 8.507292  | 6.062207 | -0.022891 | 0.007297  | 0.022100  |

91 f = 16.511276 THz 103.743406 2PiTHz 550.756863 cm-1 68.285173  
meV

|    | X         | Y         | Z        | dx        | dy        | dz        |
|----|-----------|-----------|----------|-----------|-----------|-----------|
| Li | 3.769818  | 9.645336  | 4.001386 | -0.013514 | -0.041815 | 0.060409  |
| Li | -1.316675 | 4.156264  | 2.365404 | 0.013557  | 0.041734  | -0.060378 |
| Li | -3.471104 | 2.744536  | 5.548798 | -0.013494 | 0.041748  | 0.060244  |
| Li | 5.924247  | 11.057064 | 0.817991 | 0.013549  | -0.041842 | -0.060459 |
| Na | 2.049025  | 6.784862  | 1.629696 | -0.000061 | -0.003280 | 0.000109  |
| Na | 0.404117  | 7.016739  | 4.737094 | 0.000061  | 0.003300  | -0.000112 |
| Na | 2.558546  | 13.685662 | 1.553699 | -0.000060 | 0.003290  | 0.000110  |
| Na | -0.105403 | 0.115939  | 4.813091 | 0.000059  | -0.003289 | -0.000112 |
| B  | 4.155007  | 8.978944  | 1.168663 | 0.014236  | 0.002601  | -0.023746 |
| B  | -1.701865 | 4.822656  | 5.198127 | -0.014206 | -0.002608 | 0.023748  |
| B  | 0.452564  | 2.078144  | 2.014732 | 0.014207  | -0.002595 | -0.023700 |
| B  | 2.000578  | 11.723457 | 4.352058 | -0.014235 | 0.002626  | 0.023753  |
| B  | -2.733891 | 11.746082 | 5.839177 | -0.018925 | 0.001283  | 0.013427  |
| B  | 5.187034  | 2.055518  | 0.527613 | 0.018847  | -0.001296 | -0.013368 |
| B  | 3.032605  | 4.845282  | 3.711007 | -0.018885 | -0.001289 | 0.013375  |
| B  | -0.579463 | 8.956318  | 2.655782 | 0.018913  | 0.001277  | -0.013419 |
| B  | -0.983708 | 0.054306  | 1.827988 | -0.010832 | -0.005285 | 0.016456  |
| B  | 3.436850  | 13.747295 | 4.538802 | 0.010876  | 0.005311  | -0.016489 |
| B  | 5.591279  | 6.955106  | 1.355407 | -0.010872 | 0.005297  | 0.016495  |
| B  | -3.138137 | 6.846495  | 5.011383 | 0.010838  | -0.005319 | -0.016468 |
| Si | 0.631772  | 3.486686  | 4.508512 | 0.017238  | 0.008508  | 0.007401  |
| Si | 1.821370  | 10.314915 | 1.858278 | -0.017226 | -0.008519 | -0.007417 |
| Si | -0.333059 | 10.387486 | 5.041673 | 0.017229  | -0.008519 | 0.007415  |
| Si | 2.786201  | 3.414115  | 1.325117 | -0.017204 | 0.008507  | -0.007431 |
| O  | 0.061445  | 3.072947  | 3.041906 | 0.011892  | -0.035146 | 0.017537  |
| O  | 2.391697  | 10.728653 | 3.324884 | -0.011964 | 0.035246  | -0.017559 |
| O  | 4.546126  | 9.973747  | 0.141489 | 0.011939  | 0.035230  | 0.017562  |
| O  | -2.092984 | 3.827853  | 6.225301 | -0.011903 | -0.035184 | -0.017540 |
| O  | 2.197450  | 3.933608  | 4.519003 | 0.029042  | -0.034093 | 0.020046  |
| O  | 0.255692  | 9.867992  | 1.847787 | -0.029061 | 0.034140  | -0.020084 |
| O  | -1.898737 | 10.834409 | 5.031182 | 0.029068  | 0.034152  | 0.020085  |
| O  | 4.351879  | 2.967192  | 1.335608 | -0.029026 | -0.034070 | -0.020045 |

|   |           |           |          |           |           |           |
|---|-----------|-----------|----------|-----------|-----------|-----------|
| O | -0.212316 | 4.798696  | 5.055280 | -0.003806 | 0.004701  | 0.001744  |
| O | 2.665458  | 9.002905  | 1.311510 | 0.003791  | -0.004753 | -0.001762 |
| O | 0.511030  | 11.699496 | 4.494905 | -0.003778 | -0.004767 | 0.001746  |
| O | 1.942113  | 2.102105  | 1.871885 | 0.003800  | 0.004739  | -0.001763 |
| O | 0.525580  | 2.169271  | 5.472081 | -0.000796 | 0.023270  | 0.011536  |
| O | 1.927562  | 11.632329 | 0.894709 | 0.000819  | -0.023273 | -0.011527 |
| O | -0.226867 | 9.070071  | 4.078104 | -0.000818 | -0.023278 | 0.011532  |
| O | 2.680009  | 4.731529  | 2.288686 | 0.000793  | 0.023235  | -0.011527 |
| O | 0.058846  | 0.698526  | 2.444964 | -0.019348 | 0.025786  | -0.013372 |
| O | 2.394296  | 13.103075 | 3.921826 | 0.019424  | -0.025827 | 0.013397  |
| O | 4.548725  | 7.599326  | 0.738431 | -0.019410 | -0.025822 | -0.013395 |
| O | -2.095583 | 6.202275  | 5.628359 | 0.019392  | 0.025836  | 0.013406  |
| O | -2.459230 | 13.184059 | 5.445139 | -0.009700 | -0.017075 | -0.017522 |
| O | 4.912372  | 0.617542  | 0.921651 | 0.009656  | 0.016984  | 0.017466  |
| O | 2.757943  | 6.283259  | 4.105046 | -0.009699 | 0.017034  | -0.017500 |
| O | -0.304801 | 7.518342  | 2.261744 | 0.009696  | -0.017049 | 0.017517  |
| O | -0.175430 | 2.374756  | 0.744070 | 0.041939  | -0.003664 | -0.050460 |
| O | 2.628573  | 11.426844 | 5.622720 | -0.042048 | 0.003639  | 0.050580  |
| O | 4.783002  | 9.275557  | 2.439325 | 0.042033  | 0.003635  | -0.050561 |
| O | -2.329859 | 4.526044  | 3.927465 | -0.042009 | -0.003658 | 0.050561  |
| O | -1.223866 | 12.517207 | 2.155216 | 0.002283  | -0.011288 | 0.005096  |
| O | 3.677009  | 1.284394  | 4.211574 | -0.002302 | 0.011363  | -0.005075 |
| O | 5.831438  | 5.616407  | 1.028179 | 0.002293  | 0.011355  | 0.005081  |
| O | -3.378295 | 8.185194  | 5.338611 | -0.002283 | -0.011326 | -0.005093 |
| H | -0.637445 | 12.195109 | 2.878812 | 0.002593  | -0.024011 | -0.002352 |
| H | 3.090587  | 1.606491  | 3.487978 | -0.002529 | 0.024054  | 0.002276  |
| H | 5.245016  | 5.294309  | 0.304583 | 0.002545  | 0.024041  | -0.002297 |
| H | -2.791874 | 8.507292  | 6.062207 | -0.002557 | -0.024072 | 0.002327  |

92 f = 16.409434 THz 103.103518 2PiTHz 547.359800 cm-1 67.863990  
meV

|    | X         | Y         | Z        | dx        | dy        | dz        |
|----|-----------|-----------|----------|-----------|-----------|-----------|
| Li | 3.769818  | 9.645336  | 4.001386 | 0.001294  | -0.067854 | 0.021623  |
| Li | -1.316675 | 4.156264  | 2.365404 | 0.001278  | -0.067944 | 0.021672  |
| Li | -3.471104 | 2.744536  | 5.548798 | -0.001306 | -0.067955 | -0.021669 |
| Li | 5.924247  | 11.057064 | 0.817991 | -0.001302 | -0.067862 | -0.021524 |

|    |           |           |          |           |           |           |
|----|-----------|-----------|----------|-----------|-----------|-----------|
| Na | 2.049025  | 6.784862  | 1.629696 | -0.000676 | 0.005344  | -0.000285 |
| Na | 0.404117  | 7.016739  | 4.737094 | -0.000682 | 0.005330  | -0.000260 |
| Na | 2.558546  | 13.685662 | 1.553699 | 0.000682  | 0.005339  | 0.000261  |
| Na | -0.105403 | 0.115939  | 4.813091 | 0.000675  | 0.005337  | 0.000285  |
| B  | 4.155007  | 8.978944  | 1.168663 | 0.028001  | 0.008259  | -0.013453 |
| B  | -1.701865 | 4.822656  | 5.198127 | 0.028025  | 0.008283  | -0.013462 |
| B  | 0.452564  | 2.078144  | 2.014732 | -0.028022 | 0.008280  | 0.013458  |
| B  | 2.000578  | 11.723457 | 4.352058 | -0.028006 | 0.008267  | 0.013417  |
| B  | -2.733891 | 11.746082 | 5.839177 | -0.014661 | -0.004308 | 0.027612  |
| B  | 5.187034  | 2.055518  | 0.527613 | -0.014703 | -0.004323 | 0.027633  |
| B  | 3.032605  | 4.845282  | 3.711007 | 0.014707  | -0.004329 | -0.027640 |
| B  | -0.579463 | 8.956318  | 2.655782 | 0.014686  | -0.004328 | -0.027604 |
| B  | -0.983708 | 0.054306  | 1.827988 | 0.023781  | -0.005665 | -0.024601 |
| B  | 3.436850  | 13.747295 | 4.538802 | 0.023759  | -0.005685 | -0.024578 |
| B  | 5.591279  | 6.955106  | 1.355407 | -0.023762 | -0.005662 | 0.024589  |
| B  | -3.138137 | 6.846495  | 5.011383 | -0.023782 | -0.005666 | 0.024598  |
| Si | 0.631772  | 3.486686  | 4.508512 | -0.001716 | -0.023897 | -0.002230 |
| Si | 1.821370  | 10.314915 | 1.858278 | -0.001701 | -0.023880 | -0.002210 |
| Si | -0.333059 | 10.387486 | 5.041673 | 0.001668  | -0.023877 | 0.002235  |
| Si | 2.786201  | 3.414115  | 1.325117 | 0.001715  | -0.023898 | 0.002232  |
| O  | 0.061445  | 3.072947  | 3.041906 | -0.015486 | 0.039693  | -0.017827 |
| O  | 2.391697  | 10.728653 | 3.324884 | -0.015464 | 0.039629  | -0.017797 |
| O  | 4.546126  | 9.973747  | 0.141489 | 0.015459  | 0.039636  | 0.017795  |
| O  | -2.092984 | 3.827853  | 6.225301 | 0.015486  | 0.039704  | 0.017831  |
| O  | 2.197450  | 3.933608  | 4.519003 | -0.032401 | 0.052783  | -0.024565 |
| O  | 0.255692  | 9.867992  | 1.847787 | -0.032362 | 0.052727  | -0.024558 |
| O  | -1.898737 | 10.834409 | 5.031182 | 0.032353  | 0.052722  | 0.024557  |
| O  | 4.351879  | 2.967192  | 1.335608 | 0.032404  | 0.052783  | 0.024574  |
| O  | -0.212316 | 4.798696  | 5.055280 | 0.020378  | -0.002170 | -0.005649 |
| O  | 2.665458  | 9.002905  | 1.311510 | 0.020373  | -0.002159 | -0.005638 |
| O  | 0.511030  | 11.699496 | 4.494905 | -0.020380 | -0.002180 | 0.005640  |
| O  | 1.942113  | 2.102105  | 1.871885 | -0.020365 | -0.002187 | 0.005651  |
| O  | 0.525580  | 2.169271  | 5.472081 | 0.009939  | -0.016579 | 0.010019  |
| O  | 1.927562  | 11.632329 | 0.894709 | 0.009938  | -0.016552 | 0.010029  |
| O  | -0.226867 | 9.070071  | 4.078104 | -0.009928 | -0.016537 | -0.010019 |
| O  | 2.680009  | 4.731529  | 2.288686 | -0.009944 | -0.016561 | -0.010033 |

|   |           |           |          |           |           |           |
|---|-----------|-----------|----------|-----------|-----------|-----------|
| O | 0.058846  | 0.698526  | 2.444964 | 0.014405  | -0.000197 | -0.004640 |
| O | 2.394296  | 13.103075 | 3.921826 | 0.014364  | -0.000159 | -0.004666 |
| O | 4.548725  | 7.599326  | 0.738431 | -0.014387 | -0.000181 | 0.004641  |
| O | -2.095583 | 6.202275  | 5.628359 | -0.014416 | -0.000205 | 0.004636  |
| O | -2.459230 | 13.184059 | 5.445139 | 0.002541  | -0.011032 | -0.018103 |
| O | 4.912372  | 0.617542  | 0.921651 | 0.002511  | -0.011067 | -0.018134 |
| O | 2.757943  | 6.283259  | 4.105046 | -0.002499 | -0.011088 | 0.018138  |
| O | -0.304801 | 7.518342  | 2.261744 | -0.002510 | -0.011043 | 0.018124  |
| O | -0.175430 | 2.374756  | 0.744070 | -0.027539 | -0.016308 | 0.023538  |
| O | 2.628573  | 11.426844 | 5.622720 | -0.027448 | -0.016324 | 0.023429  |
| O | 4.783002  | 9.275557  | 2.439325 | 0.027507  | -0.016324 | -0.023505 |
| O | -2.329859 | 4.526044  | 3.927465 | 0.027542  | -0.016316 | -0.023545 |
| O | -1.223866 | 12.517207 | 2.155216 | -0.003388 | 0.018615  | 0.006654  |
| O | 3.677009  | 1.284394  | 4.211574 | -0.003384 | 0.018585  | 0.006666  |
| O | 5.831438  | 5.616407  | 1.028179 | 0.003379  | 0.018625  | -0.006667 |
| O | -3.378295 | 8.185194  | 5.338611 | 0.003391  | 0.018616  | -0.006658 |
| H | -0.637445 | 12.195109 | 2.878812 | 0.000741  | 0.007670  | -0.001772 |
| H | 3.090587  | 1.606491  | 3.487978 | 0.000761  | 0.007627  | -0.001782 |
| H | 5.245016  | 5.294309  | 0.304583 | -0.000787 | 0.007667  | 0.001798  |
| H | -2.791874 | 8.507292  | 6.062207 | -0.000767 | 0.007662  | 0.001797  |

93 f = 16.217869 THz 101.899874 2PiTHz 540.969852 cm-1 67.071737 meV

|    | X         | Y         | Z        | dx        | dy        | dz        |
|----|-----------|-----------|----------|-----------|-----------|-----------|
| Li | 3.769818  | 9.645336  | 4.001386 | -0.034550 | 0.030253  | 0.068984  |
| Li | -1.316675 | 4.156264  | 2.365404 | -0.034584 | 0.030406  | 0.069042  |
| Li | -3.471104 | 2.744536  | 5.548798 | -0.034580 | -0.030266 | 0.069129  |
| Li | 5.924247  | 11.057064 | 0.817991 | -0.034596 | -0.030317 | 0.068986  |
| Na | 2.049025  | 6.784862  | 1.629696 | -0.000098 | -0.005685 | 0.002513  |
| Na | 0.404117  | 7.016739  | 4.737094 | -0.000100 | -0.005671 | 0.002491  |
| Na | 2.558546  | 13.685662 | 1.553699 | -0.000101 | 0.005675  | 0.002492  |
| Na | -0.105403 | 0.115939  | 4.813091 | -0.000097 | 0.005672  | 0.002511  |
| B  | 4.155007  | 8.978944  | 1.168663 | 0.002319  | -0.002268 | -0.023288 |
| B  | -1.701865 | 4.822656  | 5.198127 | 0.002289  | -0.002286 | -0.023287 |
| B  | 0.452564  | 2.078144  | 2.014732 | 0.002347  | 0.002264  | -0.023313 |
| B  | 2.000578  | 11.723457 | 4.352058 | 0.002290  | 0.002280  | -0.023286 |



|    |           |           |          |           |           |           |
|----|-----------|-----------|----------|-----------|-----------|-----------|
| B  | -2.733891 | 11.746082 | 5.839177 | 0.015538  | 0.005131  | -0.008162 |
| B  | 5.187034  | 2.055518  | 0.527613 | 0.015571  | 0.005145  | -0.008208 |
| B  | 3.032605  | 4.845282  | 3.711007 | 0.015556  | -0.005137 | -0.008149 |
| B  | -0.579463 | 8.956318  | 2.655782 | 0.015521  | -0.005124 | -0.008185 |
| B  | -0.983708 | 0.054306  | 1.827988 | -0.002961 | -0.008435 | 0.009095  |
| B  | 3.436850  | 13.747295 | 4.538802 | -0.002925 | -0.008431 | 0.009068  |
| B  | 5.591279  | 6.955106  | 1.355407 | -0.002932 | 0.008423  | 0.009086  |
| B  | -3.138137 | 6.846495  | 5.011383 | -0.002923 | 0.008442  | 0.009058  |
| Si | 0.631772  | 3.486686  | 4.508512 | -0.016247 | 0.000954  | 0.018431  |
| Si | 1.821370  | 10.314915 | 1.858278 | -0.016218 | 0.000936  | 0.018399  |
| Si | -0.333059 | 10.387486 | 5.041673 | -0.016221 | -0.000952 | 0.018396  |
| Si | 2.786201  | 3.414115  | 1.325117 | -0.016268 | -0.000915 | 0.018418  |
| O  | 0.061445  | 3.072947  | 3.041906 | -0.002279 | -0.018475 | 0.005279  |
| O  | 2.391697  | 10.728653 | 3.324884 | -0.002281 | -0.018404 | 0.005259  |
| O  | 4.546126  | 9.973747  | 0.141489 | -0.002274 | 0.018451  | 0.005271  |
| O  | -2.092984 | 3.827853  | 6.225301 | -0.002312 | 0.018388  | 0.005241  |
| O  | 2.197450  | 3.933608  | 4.519003 | -0.007985 | 0.019654  | 0.008060  |
| O  | 0.255692  | 9.867992  | 1.847787 | -0.007995 | 0.019674  | 0.008031  |
| O  | -1.898737 | 10.834409 | 5.031182 | -0.007975 | -0.019645 | 0.008042  |
| O  | 4.351879  | 2.967192  | 1.335608 | -0.008052 | -0.019758 | 0.008017  |
| O  | -0.212316 | 4.798696  | 5.055280 | 0.011170  | 0.033350  | 0.004145  |
| O  | 2.665458  | 9.002905  | 1.311510 | 0.011204  | 0.033309  | 0.004157  |
| O  | 0.511030  | 11.699496 | 4.494905 | 0.011163  | -0.033288 | 0.004158  |
| O  | 1.942113  | 2.102105  | 1.871885 | 0.011208  | -0.033356 | 0.004135  |
| O  | 0.525580  | 2.169271  | 5.472081 | -0.004168 | -0.034642 | -0.015994 |
| O  | 1.927562  | 11.632329 | 0.894709 | -0.004130 | -0.034596 | -0.015948 |
| O  | -0.226867 | 9.070071  | 4.078104 | -0.004137 | 0.034591  | -0.015966 |
| O  | 2.680009  | 4.731529  | 2.288686 | -0.004143 | 0.034667  | -0.015974 |
| O  | 0.058846  | 0.698526  | 2.444964 | -0.019157 | 0.019994  | -0.016776 |
| O  | 2.394296  | 13.103075 | 3.921826 | -0.019118 | 0.019957  | -0.016748 |
| O  | 4.548725  | 7.599326  | 0.738431 | -0.019114 | -0.019965 | -0.016726 |
| O  | -2.095583 | 6.202275  | 5.628359 | -0.019128 | -0.019981 | -0.016784 |
| O  | -2.459230 | 13.184059 | 5.445139 | 0.022413  | 0.023051  | 0.020793  |
| O  | 4.912372  | 0.617542  | 0.921651 | 0.022419  | 0.023084  | 0.020827  |
| O  | 2.757943  | 6.283259  | 4.105046 | 0.022425  | -0.023058 | 0.020796  |
| O  | -0.304801 | 7.518342  | 2.261744 | 0.022393  | -0.023033 | 0.020795  |

|   |           |           |          |           |           |           |
|---|-----------|-----------|----------|-----------|-----------|-----------|
| O | -0.175430 | 2.374756  | 0.744070 | 0.036606  | 0.007412  | -0.053047 |
| O | 2.628573  | 11.426844 | 5.622720 | 0.036508  | 0.007398  | -0.052940 |
| O | 4.783002  | 9.275557  | 2.439325 | 0.036509  | -0.007407 | -0.052937 |
| O | -2.329859 | 4.526044  | 3.927465 | 0.036536  | -0.007404 | -0.052979 |
| O | -1.223866 | 12.517207 | 2.155216 | -0.001623 | -0.019515 | -0.004232 |
| O | 3.677009  | 1.284394  | 4.211574 | -0.001630 | -0.019498 | -0.004243 |
| O | 5.831438  | 5.616407  | 1.028179 | -0.001622 | 0.019481  | -0.004241 |
| O | -3.378295 | 8.185194  | 5.338611 | -0.001635 | 0.019498  | -0.004230 |
| H | -0.637445 | 12.195109 | 2.878812 | -0.021170 | -0.020879 | 0.011903  |
| H | 3.090587  | 1.606491  | 3.487978 | -0.021219 | -0.020852 | 0.011930  |
| H | 5.245016  | 5.294309  | 0.304583 | -0.021198 | 0.020863  | 0.011908  |
| H | -2.791874 | 8.507292  | 6.062207 | -0.021197 | 0.020863  | 0.011915  |

94 f = 16.157237 THz 101.518914 2PiTHz 538.947399 cm-1 66.820985  
meV

|    | X         | Y         | Z        | dx        | dy        | dz        |
|----|-----------|-----------|----------|-----------|-----------|-----------|
| Li | 3.769818  | 9.645336  | 4.001386 | 0.022604  | -0.030115 | -0.066097 |
| Li | -1.316675 | 4.156264  | 2.365404 | -0.022557 | 0.030049  | 0.066037  |
| Li | -3.471104 | 2.744536  | 5.548798 | -0.022557 | -0.030052 | 0.066062  |
| Li | 5.924247  | 11.057064 | 0.817991 | 0.022631  | 0.030065  | -0.066187 |
| Na | 2.049025  | 6.784862  | 1.629696 | 0.002057  | -0.000275 | 0.001678  |
| Na | 0.404117  | 7.016739  | 4.737094 | -0.002056 | 0.000278  | -0.001675 |
| Na | 2.558546  | 13.685662 | 1.553699 | -0.002056 | -0.000273 | -0.001675 |
| Na | -0.105403 | 0.115939  | 4.813091 | 0.002057  | 0.000275  | 0.001679  |
| B  | 4.155007  | 8.978944  | 1.168663 | 0.001110  | 0.003430  | 0.026038  |
| B  | -1.701865 | 4.822656  | 5.198127 | -0.001099 | -0.003422 | -0.026006 |
| B  | 0.452564  | 2.078144  | 2.014732 | -0.001101 | 0.003419  | -0.026016 |
| B  | 2.000578  | 11.723457 | 4.352058 | 0.001094  | -0.003427 | 0.026057  |
| B  | -2.733891 | 11.746082 | 5.839177 | -0.016747 | -0.005780 | 0.003077  |
| B  | 5.187034  | 2.055518  | 0.527613 | 0.016713  | 0.005751  | -0.003056 |
| B  | 3.032605  | 4.845282  | 3.711007 | 0.016706  | -0.005758 | -0.003064 |
| B  | -0.579463 | 8.956318  | 2.655782 | -0.016732 | 0.005775  | 0.003055  |
| B  | -0.983708 | 0.054306  | 1.827988 | -0.003508 | -0.011672 | 0.010531  |
| B  | 3.436850  | 13.747295 | 4.538802 | 0.003531  | 0.011684  | -0.010559 |
| B  | 5.591279  | 6.955106  | 1.355407 | 0.003508  | -0.011680 | -0.010544 |
| B  | -3.138137 | 6.846495  | 5.011383 | -0.003514 | 0.011668  | 0.010532  |

|    |           |           |          |           |           |           |
|----|-----------|-----------|----------|-----------|-----------|-----------|
| Si | 0.631772  | 3.486686  | 4.508512 | -0.021114 | 0.000857  | 0.020563  |
| Si | 1.821370  | 10.314915 | 1.858278 | 0.021140  | -0.000867 | -0.020600 |
| Si | -0.333059 | 10.387486 | 5.041673 | 0.021162  | 0.000853  | -0.020580 |
| Si | 2.786201  | 3.414115  | 1.325117 | -0.021124 | -0.000865 | 0.020564  |
| O  | 0.061445  | 3.072947  | 3.041906 | -0.007788 | -0.013223 | 0.004248  |
| O  | 2.391697  | 10.728653 | 3.324884 | 0.007786  | 0.013262  | -0.004261 |
| O  | 4.546126  | 9.973747  | 0.141489 | 0.007800  | -0.013231 | -0.004240 |
| O  | -2.092984 | 3.827853  | 6.225301 | -0.007787 | 0.013219  | 0.004246  |
| O  | 2.197450  | 3.933608  | 4.519003 | -0.007320 | 0.012743  | 0.010160  |
| O  | 0.255692  | 9.867992  | 1.847787 | 0.007311  | -0.012731 | -0.010191 |
| O  | -1.898737 | 10.834409 | 5.031182 | 0.007344  | 0.012774  | -0.010169 |
| O  | 4.351879  | 2.967192  | 1.335608 | -0.007325 | -0.012743 | 0.010156  |
| O  | -0.212316 | 4.798696  | 5.055280 | 0.008027  | 0.034930  | 0.001924  |
| O  | 2.665458  | 9.002905  | 1.311510 | -0.008016 | -0.034962 | -0.001928 |
| O  | 0.511030  | 11.699496 | 4.494905 | -0.008020 | 0.034959  | -0.001924 |
| O  | 1.942113  | 2.102105  | 1.871885 | 0.008019  | -0.034928 | 0.001919  |
| O  | 0.525580  | 2.169271  | 5.472081 | 0.004798  | -0.029644 | -0.009480 |
| O  | 1.927562  | 11.632329 | 0.894709 | -0.004807 | 0.029673  | 0.009493  |
| O  | -0.226867 | 9.070071  | 4.078104 | -0.004810 | -0.029695 | 0.009505  |
| O  | 2.680009  | 4.731529  | 2.288686 | 0.004798  | 0.029651  | -0.009493 |
| O  | 0.058846  | 0.698526  | 2.444964 | -0.018415 | 0.024652  | -0.022447 |
| O  | 2.394296  | 13.103075 | 3.921826 | 0.018455  | -0.024680 | 0.022475  |
| O  | 4.548725  | 7.599326  | 0.738431 | 0.018431  | 0.024662  | 0.022456  |
| O  | -2.095583 | 6.202275  | 5.628359 | -0.018411 | -0.024637 | -0.022437 |
| O  | -2.459230 | 13.184059 | 5.445139 | -0.022913 | -0.018848 | -0.017147 |
| O  | 4.912372  | 0.617542  | 0.921651 | 0.022867  | 0.018806  | 0.017112  |
| O  | 2.757943  | 6.283259  | 4.105046 | 0.022862  | -0.018801 | 0.017113  |
| O  | -0.304801 | 7.518342  | 2.261744 | -0.022906 | 0.018825  | -0.017131 |
| O  | -0.175430 | 2.374756  | 0.744070 | 0.039727  | 0.003883  | -0.056944 |
| O  | 2.628573  | 11.426844 | 5.622720 | -0.039805 | -0.003888 | 0.057056  |
| O  | 4.783002  | 9.275557  | 2.439325 | -0.039756 | 0.003900  | 0.056997  |
| O  | -2.329859 | 4.526044  | 3.927465 | 0.039710  | -0.003892 | -0.056929 |
| O  | -1.223866 | 12.517207 | 2.155216 | -0.002281 | -0.017392 | 0.004761  |
| O  | 3.677009  | 1.284394  | 4.211574 | 0.002280  | 0.017446  | -0.004756 |
| O  | 5.831438  | 5.616407  | 1.028179 | 0.002287  | -0.017428 | -0.004749 |
| O  | -3.378295 | 8.185194  | 5.338611 | -0.002281 | 0.017399  | 0.004751  |

|   |           |           |          |           |           |           |
|---|-----------|-----------|----------|-----------|-----------|-----------|
| H | -0.637445 | 12.195109 | 2.878812 | -0.001454 | -0.025386 | 0.000414  |
| H | 3.090587  | 1.606491  | 3.487978 | 0.001488  | 0.025421  | -0.000448 |
| H | 5.245016  | 5.294309  | 0.304583 | 0.001504  | -0.025407 | -0.000446 |
| H | -2.791874 | 8.507292  | 6.062207 | -0.001458 | 0.025374  | 0.000418  |

95 f = 15.748946 THz 98.953548 2PiTHz 525.328285 cm-1 65.132430 meV

|    | X         | Y         | Z        | dx        | dy        | dz        |
|----|-----------|-----------|----------|-----------|-----------|-----------|
| Li | 3.769818  | 9.645336  | 4.001386 | 0.045886  | -0.059280 | 0.029806  |
| Li | -1.316675 | 4.156264  | 2.365404 | 0.045885  | -0.059263 | 0.029833  |
| Li | -3.471104 | 2.744536  | 5.548798 | 0.045873  | 0.059297  | 0.029830  |
| Li | 5.924247  | 11.057064 | 0.817991 | 0.045892  | 0.059267  | 0.029822  |
| Na | 2.049025  | 6.784862  | 1.629696 | -0.001590 | 0.008663  | -0.003016 |
| Na | 0.404117  | 7.016739  | 4.737094 | -0.001589 | 0.008651  | -0.003011 |
| Na | 2.558546  | 13.685662 | 1.553699 | -0.001591 | -0.008664 | -0.003012 |
| Na | -0.105403 | 0.115939  | 4.813091 | -0.001589 | -0.008654 | -0.003015 |
| B  | 4.155007  | 8.978944  | 1.168663 | -0.020203 | 0.001958  | -0.013969 |
| B  | -1.701865 | 4.822656  | 5.198127 | -0.020218 | 0.001948  | -0.013973 |
| B  | 0.452564  | 2.078144  | 2.014732 | -0.020200 | -0.001951 | -0.013975 |
| B  | 2.000578  | 11.723457 | 4.352058 | -0.020212 | -0.001964 | -0.013965 |
| B  | -2.733891 | 11.746082 | 5.839177 | 0.011299  | 0.027840  | 0.010612  |
| B  | 5.187034  | 2.055518  | 0.527613 | 0.011316  | 0.027841  | 0.010611  |
| B  | 3.032605  | 4.845282  | 3.711007 | 0.011317  | -0.027839 | 0.010634  |
| B  | -0.579463 | 8.956318  | 2.655782 | 0.011290  | -0.027830 | 0.010598  |
| B  | -0.983708 | 0.054306  | 1.827988 | 0.001338  | -0.014003 | -0.009410 |
| B  | 3.436850  | 13.747295 | 4.538802 | 0.001345  | -0.013987 | -0.009425 |
| B  | 5.591279  | 6.955106  | 1.355407 | 0.001349  | 0.013983  | -0.009412 |
| B  | -3.138137 | 6.846495  | 5.011383 | 0.001348  | 0.014005  | -0.009422 |
| Si | 0.631772  | 3.486686  | 4.508512 | -0.023827 | 0.001475  | 0.006651  |
| Si | 1.821370  | 10.314915 | 1.858278 | -0.023814 | 0.001452  | 0.006641  |
| Si | -0.333059 | 10.387486 | 5.041673 | -0.023812 | -0.001459 | 0.006642  |
| Si | 2.786201  | 3.414115  | 1.325117 | -0.023835 | -0.001456 | 0.006649  |
| O  | 0.061445  | 3.072947  | 3.041906 | 0.000523  | 0.025607  | -0.015859 |
| O  | 2.391697  | 10.728653 | 3.324884 | 0.000520  | 0.025602  | -0.015860 |
| O  | 4.546126  | 9.973747  | 0.141489 | 0.000518  | -0.025590 | -0.015855 |
| O  | -2.092984 | 3.827853  | 6.225301 | 0.000518  | -0.025633 | -0.015874 |

|   |           |           |          |           |           |           |
|---|-----------|-----------|----------|-----------|-----------|-----------|
| O | 2.197450  | 3.933608  | 4.519003 | 0.002123  | -0.027630 | 0.020831  |
| O | 0.255692  | 9.867992  | 1.847787 | 0.002108  | -0.027585 | 0.020821  |
| O | -1.898737 | 10.834409 | 5.031182 | 0.002115  | 0.027605  | 0.020828  |
| O | 4.351879  | 2.967192  | 1.335608 | 0.002103  | 0.027593  | 0.020819  |
| O | -0.212316 | 4.798696  | 5.055280 | -0.048175 | -0.029608 | -0.000558 |
| O | 2.665458  | 9.002905  | 1.311510 | -0.048135 | -0.029589 | -0.000556 |
| O | 0.511030  | 11.699496 | 4.494905 | -0.048148 | 0.029600  | -0.000554 |
| O | 1.942113  | 2.102105  | 1.871885 | -0.048157 | 0.029600  | -0.000563 |
| O | 0.525580  | 2.169271  | 5.472081 | 0.037204  | 0.019269  | 0.017660  |
| O | 1.927562  | 11.632329 | 0.894709 | 0.037206  | 0.019264  | 0.017655  |
| O | -0.226867 | 9.070071  | 4.078104 | 0.037195  | -0.019253 | 0.017642  |
| O | 2.680009  | 4.731529  | 2.288686 | 0.037222  | -0.019271 | 0.017677  |
| O | 0.058846  | 0.698526  | 2.444964 | -0.001013 | -0.008669 | -0.011646 |
| O | 2.394296  | 13.103075 | 3.921826 | -0.001001 | -0.008686 | -0.011637 |
| O | 4.548725  | 7.599326  | 0.738431 | -0.000995 | 0.008673  | -0.011631 |
| O | -2.095583 | 6.202275  | 5.628359 | -0.001006 | 0.008675  | -0.011652 |
| O | -2.459230 | 13.184059 | 5.445139 | 0.018733  | 0.012893  | -0.003870 |
| O | 4.912372  | 0.617542  | 0.921651 | 0.018736  | 0.012898  | -0.003849 |
| O | 2.757943  | 6.283259  | 4.105046 | 0.018744  | -0.012895 | -0.003859 |
| O | -0.304801 | 7.518342  | 2.261744 | 0.018725  | -0.012888 | -0.003858 |
| O | -0.175430 | 2.374756  | 0.744070 | 0.019404  | -0.023987 | -0.026532 |
| O | 2.628573  | 11.426844 | 5.622720 | 0.019367  | -0.023995 | -0.026496 |
| O | 4.783002  | 9.275557  | 2.439325 | 0.019362  | 0.023987  | -0.026496 |
| O | -2.329859 | 4.526044  | 3.927465 | 0.019389  | 0.023995  | -0.026523 |
| O | -1.223866 | 12.517207 | 2.155216 | 0.002258  | -0.016809 | 0.005311  |
| O | 3.677009  | 1.284394  | 4.211574 | 0.002270  | -0.016785 | 0.005315  |
| O | 5.831438  | 5.616407  | 1.028179 | 0.002265  | 0.016779  | 0.005302  |
| O | -3.378295 | 8.185194  | 5.338611 | 0.002259  | 0.016804  | 0.005320  |
| H | -0.637445 | 12.195109 | 2.878812 | -0.032071 | 0.005245  | 0.045974  |
| H | 3.090587  | 1.606491  | 3.487978 | -0.032079 | 0.005284  | 0.046001  |
| H | 5.245016  | 5.294309  | 0.304583 | -0.032105 | -0.005269 | 0.045996  |
| H | -2.791874 | 8.507292  | 6.062207 | -0.032061 | -0.005248 | 0.045975  |

96 f = 15.705556 THz    98.680916 2PiTHz    523.880930 cm-1    64.952980 meV

X                    Y                    Z                    dx                    dy                    dz

|    |           |           |          |           |           |           |
|----|-----------|-----------|----------|-----------|-----------|-----------|
| Li | 3.769818  | 9.645336  | 4.001386 | 0.077056  | -0.049019 | 0.051850  |
| Li | -1.316675 | 4.156264  | 2.365404 | -0.077028 | 0.049007  | -0.051865 |
| Li | -3.471104 | 2.744536  | 5.548798 | -0.077034 | -0.048993 | -0.051836 |
| Li | 5.924247  | 11.057064 | 0.817991 | 0.077065  | 0.049044  | 0.051891  |
| Na | 2.049025  | 6.784862  | 1.629696 | 0.001517  | -0.000213 | 0.001079  |
| Na | 0.404117  | 7.016739  | 4.737094 | -0.001517 | 0.000208  | -0.001060 |
| Na | 2.558546  | 13.685662 | 1.553699 | -0.001518 | -0.000213 | -0.001061 |
| Na | -0.105403 | 0.115939  | 4.813091 | 0.001517  | 0.000211  | 0.001079  |
| B  | 4.155007  | 8.978944  | 1.168663 | -0.016288 | 0.015026  | -0.010575 |
| B  | -1.701865 | 4.822656  | 5.198127 | 0.016260  | -0.015016 | 0.010573  |
| B  | 0.452564  | 2.078144  | 2.014732 | 0.016269  | 0.015019  | 0.010565  |
| B  | 2.000578  | 11.723457 | 4.352058 | -0.016278 | -0.015028 | -0.010571 |
| B  | -2.733891 | 11.746082 | 5.839177 | 0.001130  | 0.033156  | 0.008903  |
| B  | 5.187034  | 2.055518  | 0.527613 | -0.001115 | -0.033154 | -0.008903 |
| B  | 3.032605  | 4.845282  | 3.711007 | -0.001125 | 0.033153  | -0.008902 |
| B  | -0.579463 | 8.956318  | 2.655782 | 0.001118  | -0.033151 | 0.008899  |
| B  | -0.983708 | 0.054306  | 1.827988 | 0.000352  | 0.005894  | 0.010848  |
| B  | 3.436850  | 13.747295 | 4.538802 | -0.000351 | -0.005899 | -0.010855 |
| B  | 5.591279  | 6.955106  | 1.355407 | -0.000342 | 0.005898  | -0.010849 |
| B  | -3.138137 | 6.846495  | 5.011383 | 0.000353  | -0.005896 | 0.010844  |
| Si | 0.631772  | 3.486686  | 4.508512 | 0.025609  | 0.001040  | 0.006598  |
| Si | 1.821370  | 10.314915 | 1.858278 | -0.025604 | -0.001039 | -0.006592 |
| Si | -0.333059 | 10.387486 | 5.041673 | -0.025611 | 0.001041  | -0.006595 |
| Si | 2.786201  | 3.414115  | 1.325117 | 0.025601  | -0.001042 | 0.006593  |
| O  | 0.061445  | 3.072947  | 3.041906 | -0.007007 | -0.017911 | 0.021690  |
| O  | 2.391697  | 10.728653 | 3.324884 | 0.007007  | 0.017912  | -0.021692 |
| O  | 4.546126  | 9.973747  | 0.141489 | 0.007000  | -0.017918 | -0.021698 |
| O  | -2.092984 | 3.827853  | 6.225301 | -0.007018 | 0.017903  | 0.021688  |
| O  | 2.197450  | 3.933608  | 4.519003 | 0.008207  | 0.018998  | -0.020125 |
| O  | 0.255692  | 9.867992  | 1.847787 | -0.008195 | -0.019011 | 0.020144  |
| O  | -1.898737 | 10.834409 | 5.031182 | -0.008203 | 0.019003  | 0.020140  |
| O  | 4.351879  | 2.967192  | 1.335608 | 0.008198  | -0.019009 | -0.020131 |
| O  | -0.212316 | 4.798696  | 5.055280 | 0.040496  | 0.030855  | -0.010587 |
| O  | 2.665458  | 9.002905  | 1.311510 | -0.040518 | -0.030856 | 0.010577  |
| O  | 0.511030  | 11.699496 | 4.494905 | -0.040513 | 0.030860  | 0.010583  |
| O  | 1.942113  | 2.102105  | 1.871885 | 0.040493  | -0.030847 | -0.010583 |

|   |           |           |          |           |           |           |
|---|-----------|-----------|----------|-----------|-----------|-----------|
| O | 0.525580  | 2.169271  | 5.472081 | -0.036683 | -0.020844 | -0.008888 |
| O | 1.927562  | 11.632329 | 0.894709 | 0.036701  | 0.020852  | 0.008899  |
| O | -0.226867 | 9.070071  | 4.078104 | 0.036696  | -0.020839 | 0.008885  |
| O | 2.680009  | 4.731529  | 2.288686 | -0.036687 | 0.020846  | -0.008896 |
| O | 0.058846  | 0.698526  | 2.444964 | -0.002072 | 0.009997  | 0.000951  |
| O | 2.394296  | 13.103075 | 3.921826 | 0.002071  | -0.010004 | -0.000959 |
| O | 4.548725  | 7.599326  | 0.738431 | 0.002082  | 0.010006  | -0.000945 |
| O | -2.095583 | 6.202275  | 5.628359 | -0.002068 | -0.009992 | 0.000955  |
| O | -2.459230 | 13.184059 | 5.445139 | 0.013869  | 0.015745  | -0.009473 |
| O | 4.912372  | 0.617542  | 0.921651 | -0.013864 | -0.015734 | 0.009476  |
| O | 2.757943  | 6.283259  | 4.105046 | -0.013866 | 0.015741  | 0.009465  |
| O | -0.304801 | 7.518342  | 2.261744 | 0.013873  | -0.015743 | -0.009469 |
| O | -0.175430 | 2.374756  | 0.744070 | -0.010024 | 0.020777  | 0.011313  |
| O | 2.628573  | 11.426844 | 5.622720 | 0.010040  | -0.020793 | -0.011335 |
| O | 4.783002  | 9.275557  | 2.439325 | 0.010020  | 0.020787  | -0.011326 |
| O | -2.329859 | 4.526044  | 3.927465 | -0.010041 | -0.020784 | 0.011335  |
| O | -1.223866 | 12.517207 | 2.155216 | -0.003473 | -0.000687 | -0.018436 |
| O | 3.677009  | 1.284394  | 4.211574 | 0.003476  | 0.000685  | 0.018431  |
| O | 5.831438  | 5.616407  | 1.028179 | 0.003467  | -0.000688 | 0.018422  |
| O | -3.378295 | 8.185194  | 5.338611 | -0.003472 | 0.000678  | -0.018429 |
| H | -0.637445 | 12.195109 | 2.878812 | -0.067283 | 0.003247  | 0.036145  |
| H | 3.090587  | 1.606491  | 3.487978 | 0.067259  | -0.003235 | -0.036118 |
| H | 5.245016  | 5.294309  | 0.304583 | 0.067251  | 0.003250  | -0.036136 |
| H | -2.791874 | 8.507292  | 6.062207 | -0.067269 | -0.003252 | 0.036138  |

97 f = 15.443210 THz    97.032552 2PiTHz    515.130029 cm-1    63.868007 meV

|    | X         | Y         | Z        | dx        | dy        | dz        |
|----|-----------|-----------|----------|-----------|-----------|-----------|
| Li | 3.769818  | 9.645336  | 4.001386 | 0.049519  | 0.031170  | 0.063530  |
| Li | -1.316675 | 4.156264  | 2.365404 | -0.049530 | -0.031151 | -0.063496 |
| Li | -3.471104 | 2.744536  | 5.548798 | -0.049521 | 0.031151  | -0.063502 |
| Li | 5.924247  | 11.057064 | 0.817991 | 0.049504  | -0.031193 | 0.063494  |
| Na | 2.049025  | 6.784862  | 1.629696 | -0.001942 | 0.001483  | 0.000093  |
| Na | 0.404117  | 7.016739  | 4.737094 | 0.001949  | -0.001484 | -0.000069 |
| Na | 2.558546  | 13.685662 | 1.553699 | 0.001949  | 0.001489  | -0.000067 |
| Na | -0.105403 | 0.115939  | 4.813091 | -0.001942 | -0.001481 | 0.000094  |

|    |           |           |          |           |           |           |
|----|-----------|-----------|----------|-----------|-----------|-----------|
| B  | 4.155007  | 8.978944  | 1.168663 | 0.018100  | 0.032583  | 0.000408  |
| B  | -1.701865 | 4.822656  | 5.198127 | -0.018080 | -0.032585 | -0.000403 |
| B  | 0.452564  | 2.078144  | 2.014732 | -0.018086 | 0.032579  | -0.000400 |
| B  | 2.000578  | 11.723457 | 4.352058 | 0.018094  | -0.032581 | 0.000400  |
| B  | -2.733891 | 11.746082 | 5.839177 | -0.017221 | 0.010763  | -0.011798 |
| B  | 5.187034  | 2.055518  | 0.527613 | 0.017207  | -0.010769 | 0.011792  |
| B  | 3.032605  | 4.845282  | 3.711007 | 0.017212  | 0.010771  | 0.011790  |
| B  | -0.579463 | 8.956318  | 2.655782 | -0.017214 | -0.010766 | -0.011793 |
| B  | -0.983708 | 0.054306  | 1.827988 | 0.018075  | -0.012615 | -0.011658 |
| B  | 3.436850  | 13.747295 | 4.538802 | -0.018079 | 0.012614  | 0.011662  |
| B  | 5.591279  | 6.955106  | 1.355407 | -0.018086 | -0.012619 | 0.011656  |
| B  | -3.138137 | 6.846495  | 5.011383 | 0.018075  | 0.012618  | -0.011654 |
| Si | 0.631772  | 3.486686  | 4.508512 | 0.005125  | 0.006888  | 0.032413  |
| Si | 1.821370  | 10.314915 | 1.858278 | -0.005123 | -0.006893 | -0.032419 |
| Si | -0.333059 | 10.387486 | 5.041673 | -0.005114 | 0.006895  | -0.032413 |
| Si | 2.786201  | 3.414115  | 1.325117 | 0.005126  | -0.006892 | 0.032414  |
| O  | 0.061445  | 3.072947  | 3.041906 | -0.017590 | 0.027961  | 0.016253  |
| O  | 2.391697  | 10.728653 | 3.324884 | 0.017594  | -0.027965 | -0.016258 |
| O  | 4.546126  | 9.973747  | 0.141489 | 0.017600  | 0.027964  | -0.016255 |
| O  | -2.092984 | 3.827853  | 6.225301 | -0.017588 | -0.027960 | 0.016254  |
| O  | 2.197450  | 3.933608  | 4.519003 | 0.024188  | -0.031170 | -0.000275 |
| O  | 0.255692  | 9.867992  | 1.847787 | -0.024198 | 0.031193  | 0.000262  |
| O  | -1.898737 | 10.834409 | 5.031182 | -0.024193 | -0.031192 | 0.000266  |
| O  | 4.351879  | 2.967192  | 1.335608 | 0.024190  | 0.031177  | -0.000272 |
| O  | -0.212316 | 4.798696  | 5.055280 | -0.032490 | -0.009420 | -0.037156 |
| O  | 2.665458  | 9.002905  | 1.311510 | 0.032516  | 0.009433  | 0.037169  |
| O  | 0.511030  | 11.699496 | 4.494905 | 0.032516  | -0.009430 | 0.037173  |
| O  | 1.942113  | 2.102105  | 1.871885 | -0.032492 | 0.009416  | -0.037163 |
| O  | 0.525580  | 2.169271  | 5.472081 | 0.013252  | 0.010583  | 0.028598  |
| O  | 1.927562  | 11.632329 | 0.894709 | -0.013266 | -0.010596 | -0.028613 |
| O  | -0.226867 | 9.070071  | 4.078104 | -0.013269 | 0.010591  | -0.028600 |
| O  | 2.680009  | 4.731529  | 2.288686 | 0.013254  | -0.010583 | 0.028599  |
| O  | 0.058846  | 0.698526  | 2.444964 | 0.004194  | 0.008309  | -0.016366 |
| O  | 2.394296  | 13.103075 | 3.921826 | -0.004198 | -0.008308 | 0.016366  |
| O  | 4.548725  | 7.599326  | 0.738431 | -0.004200 | 0.008311  | 0.016361  |
| O  | -2.095583 | 6.202275  | 5.628359 | 0.004193  | -0.008311 | -0.016367 |



|   |           |           |          |           |           |           |
|---|-----------|-----------|----------|-----------|-----------|-----------|
| O | -2.459230 | 13.184059 | 5.445139 | -0.009019 | 0.006742  | 0.000208  |
| O | 4.912372  | 0.617542  | 0.921651 | 0.009015  | -0.006738 | -0.000200 |
| O | 2.757943  | 6.283259  | 4.105046 | 0.009015  | 0.006741  | -0.000193 |
| O | -0.304801 | 7.518342  | 2.261744 | -0.009024 | -0.006742 | 0.000200  |
| O | -0.175430 | 2.374756  | 0.744070 | 0.011968  | -0.024498 | -0.023758 |
| O | 2.628573  | 11.426844 | 5.622720 | -0.011977 | 0.024516  | 0.023769  |
| O | 4.783002  | 9.275557  | 2.439325 | -0.011963 | -0.024507 | 0.023767  |
| O | -2.329859 | 4.526044  | 3.927465 | 0.011973  | 0.024493  | -0.023768 |
| O | -1.223866 | 12.517207 | 2.155216 | -0.012268 | -0.009858 | -0.004365 |
| O | 3.677009  | 1.284394  | 4.211574 | 0.012269  | 0.009855  | 0.004363  |
| O | 5.831438  | 5.616407  | 1.028179 | 0.012268  | -0.009862 | 0.004365  |
| O | -3.378295 | 8.185194  | 5.338611 | -0.012274 | 0.009866  | -0.004374 |
| H | -0.637445 | 12.195109 | 2.878812 | -0.023929 | -0.009256 | 0.003604  |
| H | 3.090587  | 1.606491  | 3.487978 | 0.023938  | 0.009251  | -0.003614 |
| H | 5.245016  | 5.294309  | 0.304583 | 0.023949  | -0.009265 | -0.003619 |
| H | -2.791874 | 8.507292  | 6.062207 | -0.023943 | 0.009264  | 0.003602  |

98 f = 15.315343 THz 96.229141 2PiTHz 510.864851 cm-1 63.339192

meV

|    | X         | Y         | Z        | dx        | dy        | dz        |
|----|-----------|-----------|----------|-----------|-----------|-----------|
| Li | 3.769818  | 9.645336  | 4.001386 | 0.081494  | 0.007160  | 0.073881  |
| Li | -1.316675 | 4.156264  | 2.365404 | 0.081510  | 0.007153  | 0.073877  |
| Li | -3.471104 | 2.744536  | 5.548798 | 0.081504  | -0.007166 | 0.073882  |
| Li | 5.924247  | 11.057064 | 0.817991 | 0.081505  | -0.007151 | 0.073880  |
| Na | 2.049025  | 6.784862  | 1.629696 | -0.000974 | -0.002304 | -0.002003 |
| Na | 0.404117  | 7.016739  | 4.737094 | -0.000978 | -0.002304 | -0.001982 |
| Na | 2.558546  | 13.685662 | 1.553699 | -0.000977 | 0.002308  | -0.001982 |
| Na | -0.105403 | 0.115939  | 4.813091 | -0.000974 | 0.002302  | -0.002003 |
| B  | 4.155007  | 8.978944  | 1.168663 | 0.005543  | 0.033181  | 0.002212  |
| B  | -1.701865 | 4.822656  | 5.198127 | 0.005543  | 0.033192  | 0.002221  |
| B  | 0.452564  | 2.078144  | 2.014732 | 0.005541  | -0.033188 | 0.002215  |
| B  | 2.000578  | 11.723457 | 4.352058 | 0.005543  | -0.033181 | 0.002223  |
| B  | -2.733891 | 11.746082 | 5.839177 | -0.012757 | 0.018218  | -0.013188 |
| B  | 5.187034  | 2.055518  | 0.527613 | -0.012756 | 0.018220  | -0.013181 |
| B  | 3.032605  | 4.845282  | 3.711007 | -0.012762 | -0.018223 | -0.013190 |
| B  | -0.579463 | 8.956318  | 2.655782 | -0.012750 | -0.018219 | -0.013181 |

|    |           |           |          |           |           |           |
|----|-----------|-----------|----------|-----------|-----------|-----------|
| B  | -0.983708 | 0.054306  | 1.827988 | -0.014360 | 0.002587  | 0.003350  |
| B  | 3.436850  | 13.747295 | 4.538802 | -0.014362 | 0.002588  | 0.003343  |
| B  | 5.591279  | 6.955106  | 1.355407 | -0.014358 | -0.002582 | 0.003346  |
| B  | -3.138137 | 6.846495  | 5.011383 | -0.014364 | -0.002592 | 0.003352  |
| Si | 0.631772  | 3.486686  | 4.508512 | -0.008477 | -0.003775 | -0.033450 |
| Si | 1.821370  | 10.314915 | 1.858278 | -0.008475 | -0.003778 | -0.033440 |
| Si | -0.333059 | 10.387486 | 5.041673 | -0.008470 | 0.003784  | -0.033443 |
| Si | 2.786201  | 3.414115  | 1.325117 | -0.008477 | 0.003767  | -0.033449 |
| O  | 0.061445  | 3.072947  | 3.041906 | 0.018602  | -0.011960 | -0.023675 |
| O  | 2.391697  | 10.728653 | 3.324884 | 0.018583  | -0.011953 | -0.023671 |
| O  | 4.546126  | 9.973747  | 0.141489 | 0.018592  | 0.011953  | -0.023676 |
| O  | -2.092984 | 3.827853  | 6.225301 | 0.018600  | 0.011965  | -0.023671 |
| O  | 2.197450  | 3.933608  | 4.519003 | -0.021745 | 0.024086  | 0.005794  |
| O  | 0.255692  | 9.867992  | 1.847787 | -0.021741 | 0.024082  | 0.005789  |
| O  | -1.898737 | 10.834409 | 5.031182 | -0.021741 | -0.024088 | 0.005794  |
| O  | 4.351879  | 2.967192  | 1.335608 | -0.021742 | -0.024080 | 0.005793  |
| O  | -0.212316 | 4.798696  | 5.055280 | 0.008005  | -0.009397 | 0.037340  |
| O  | 2.665458  | 9.002905  | 1.311510 | 0.007999  | -0.009403 | 0.037339  |
| O  | 0.511030  | 11.699496 | 4.494905 | 0.008008  | 0.009396  | 0.037341  |
| O  | 1.942113  | 2.102105  | 1.871885 | 0.008002  | 0.009405  | 0.037348  |
| O  | 0.525580  | 2.169271  | 5.472081 | -0.006414 | -0.003667 | -0.028022 |
| O  | 1.927562  | 11.632329 | 0.894709 | -0.006429 | -0.003680 | -0.028028 |
| O  | -0.226867 | 9.070071  | 4.078104 | -0.006425 | 0.003675  | -0.028019 |
| O  | 2.680009  | 4.731529  | 2.288686 | -0.006423 | 0.003671  | -0.028033 |
| O  | 0.058846  | 0.698526  | 2.444964 | -0.003188 | -0.021686 | 0.021702  |
| O  | 2.394296  | 13.103075 | 3.921826 | -0.003185 | -0.021690 | 0.021694  |
| O  | 4.548725  | 7.599326  | 0.738431 | -0.003192 | 0.021683  | 0.021690  |
| O  | -2.095583 | 6.202275  | 5.628359 | -0.003182 | 0.021696  | 0.021711  |
| O  | -2.459230 | 13.184059 | 5.445139 | 0.001050  | 0.016964  | 0.003562  |
| O  | 4.912372  | 0.617542  | 0.921651 | 0.001060  | 0.016964  | 0.003567  |
| O  | 2.757943  | 6.283259  | 4.105046 | 0.001054  | -0.016967 | 0.003564  |
| O  | -0.304801 | 7.518342  | 2.261744 | 0.001063  | -0.016966 | 0.003568  |
| O  | -0.175430 | 2.374756  | 0.744070 | -0.009867 | 0.019567  | 0.020120  |
| O  | 2.628573  | 11.426844 | 5.622720 | -0.009865 | 0.019563  | 0.020118  |
| O  | 4.783002  | 9.275557  | 2.439325 | -0.009859 | -0.019566 | 0.020109  |
| O  | -2.329859 | 4.526044  | 3.927465 | -0.009869 | -0.019567 | 0.020129  |

|   |           |           |          |          |           |           |
|---|-----------|-----------|----------|----------|-----------|-----------|
| O | -1.223866 | 12.517207 | 2.155216 | 0.008365 | -0.003173 | -0.003169 |
| O | 3.677009  | 1.284394  | 4.211574 | 0.008363 | -0.003171 | -0.003163 |
| O | 5.831438  | 5.616407  | 1.028179 | 0.008357 | 0.003179  | -0.003168 |
| O | -3.378295 | 8.185194  | 5.338611 | 0.008371 | 0.003167  | -0.003163 |
| H | -0.637445 | 12.195109 | 2.878812 | 0.006859 | 0.025181  | 0.010622  |
| H | 3.090587  | 1.606491  | 3.487978 | 0.006866 | 0.025201  | 0.010632  |
| H | 5.245016  | 5.294309  | 0.304583 | 0.006844 | -0.025183 | 0.010634  |
| H | -2.791874 | 8.507292  | 6.062207 | 0.006876 | -0.025199 | 0.010626  |

99 f = 14.756371 THz 92.717012 2PiTHz 492.219530 cm-1 61.027466 meV

|    | X         | Y         | Z        | dx        | dy        | dz        |
|----|-----------|-----------|----------|-----------|-----------|-----------|
| Li | 3.769818  | 9.645336  | 4.001386 | 0.090298  | -0.046476 | 0.076964  |
| Li | -1.316675 | 4.156264  | 2.365404 | -0.090270 | 0.046451  | -0.076948 |
| Li | -3.471104 | 2.744536  | 5.548798 | 0.090277  | 0.046459  | 0.076960  |
| Li | 5.924247  | 11.057064 | 0.817991 | -0.090293 | -0.046441 | -0.076950 |
| Na | 2.049025  | 6.784862  | 1.629696 | 0.000214  | -0.006730 | 0.001364  |
| Na | 0.404117  | 7.016739  | 4.737094 | -0.000220 | 0.006722  | -0.001392 |
| Na | 2.558546  | 13.685662 | 1.553699 | 0.000221  | 0.006736  | 0.001393  |
| Na | -0.105403 | 0.115939  | 4.813091 | -0.000212 | -0.006719 | -0.001364 |
| B  | 4.155007  | 8.978944  | 1.168663 | 0.000952  | 0.005693  | 0.025179  |
| B  | -1.701865 | 4.822656  | 5.198127 | -0.000960 | -0.005680 | -0.025187 |
| B  | 0.452564  | 2.078144  | 2.014732 | 0.000962  | -0.005690 | 0.025197  |
| B  | 2.000578  | 11.723457 | 4.352058 | -0.000964 | 0.005695  | -0.025176 |
| B  | -2.733891 | 11.746082 | 5.839177 | -0.006211 | -0.002558 | -0.016774 |
| B  | 5.187034  | 2.055518  | 0.527613 | 0.006197  | 0.002547  | 0.016789  |
| B  | 3.032605  | 4.845282  | 3.711007 | -0.006200 | 0.002543  | -0.016788 |
| B  | -0.579463 | 8.956318  | 2.655782 | 0.006211  | -0.002558 | 0.016773  |
| B  | -0.983708 | 0.054306  | 1.827988 | -0.006609 | 0.012583  | -0.021832 |
| B  | 3.436850  | 13.747295 | 4.538802 | 0.006601  | -0.012591 | 0.021827  |
| B  | 5.591279  | 6.955106  | 1.355407 | -0.006600 | -0.012583 | -0.021837 |
| B  | -3.138137 | 6.846495  | 5.011383 | 0.006604  | 0.012589  | 0.021829  |
| Si | 0.631772  | 3.486686  | 4.508512 | 0.005373  | -0.011729 | 0.011582  |
| Si | 1.821370  | 10.314915 | 1.858278 | -0.005358 | 0.011736  | -0.011570 |
| Si | -0.333059 | 10.387486 | 5.041673 | 0.005355  | 0.011730  | 0.011583  |
| Si | 2.786201  | 3.414115  | 1.325117 | -0.005372 | -0.011732 | -0.011589 |

|   |           |           |          |           |           |           |
|---|-----------|-----------|----------|-----------|-----------|-----------|
| O | 0.061445  | 3.072947  | 3.041906 | -0.008716 | 0.011487  | 0.004577  |
| O | 2.391697  | 10.728653 | 3.324884 | 0.008734  | -0.011462 | -0.004575 |
| O | 4.546126  | 9.973747  | 0.141489 | -0.008721 | -0.011478 | 0.004576  |
| O | -2.092984 | 3.827853  | 6.225301 | 0.008736  | 0.011487  | -0.004582 |
| O | 2.197450  | 3.933608  | 4.519003 | -0.000984 | 0.014983  | 0.002704  |
| O | 0.255692  | 9.867992  | 1.847787 | 0.000993  | -0.014991 | -0.002702 |
| O | -1.898737 | 10.834409 | 5.031182 | -0.000990 | -0.014980 | 0.002696  |
| O | 4.351879  | 2.967192  | 1.335608 | 0.000980  | 0.014986  | -0.002718 |
| O | -0.212316 | 4.798696  | 5.055280 | -0.012667 | -0.025374 | 0.013530  |
| O | 2.665458  | 9.002905  | 1.311510 | 0.012653  | 0.025369  | -0.013544 |
| O | 0.511030  | 11.699496 | 4.494905 | -0.012678 | 0.025390  | 0.013551  |
| O | 1.942113  | 2.102105  | 1.871885 | 0.012669  | -0.025366 | -0.013520 |
| O | 0.525580  | 2.169271  | 5.472081 | -0.000306 | 0.016947  | 0.032022  |
| O | 1.927562  | 11.632329 | 0.894709 | 0.000300  | -0.016948 | -0.032011 |
| O | -0.226867 | 9.070071  | 4.078104 | -0.000296 | -0.016947 | 0.032011  |
| O | 2.680009  | 4.731529  | 2.288686 | 0.000300  | 0.016938  | -0.032023 |
| O | 0.058846  | 0.698526  | 2.444964 | 0.003916  | -0.003533 | -0.016009 |
| O | 2.394296  | 13.103075 | 3.921826 | -0.003913 | 0.003516  | 0.015997  |
| O | 4.548725  | 7.599326  | 0.738431 | 0.003913  | 0.003525  | -0.016010 |
| O | -2.095583 | 6.202275  | 5.628359 | -0.003920 | -0.003522 | 0.016013  |
| O | -2.459230 | 13.184059 | 5.445139 | 0.016443  | 0.004600  | 0.026939  |
| O | 4.912372  | 0.617542  | 0.921651 | -0.016463 | -0.004610 | -0.026941 |
| O | 2.757943  | 6.283259  | 4.105046 | 0.016465  | -0.004613 | 0.026938  |
| O | -0.304801 | 7.518342  | 2.261744 | -0.016438 | 0.004587  | -0.026938 |
| O | -0.175430 | 2.374756  | 0.744070 | 0.008464  | -0.022944 | 0.022874  |
| O | 2.628573  | 11.426844 | 5.622720 | -0.008462 | 0.022934  | -0.022873 |
| O | 4.783002  | 9.275557  | 2.439325 | 0.008465  | 0.022954  | 0.022861  |
| O | -2.329859 | 4.526044  | 3.927465 | -0.008472 | -0.022952 | -0.022856 |
| O | -1.223866 | 12.517207 | 2.155216 | 0.010111  | 0.028311  | 0.019133  |
| O | 3.677009  | 1.284394  | 4.211574 | -0.010123 | -0.028308 | -0.019139 |
| O | 5.831438  | 5.616407  | 1.028179 | 0.010118  | -0.028306 | 0.019137  |
| O | -3.378295 | 8.185194  | 5.338611 | -0.010110 | 0.028313  | -0.019136 |
| H | -0.637445 | 12.195109 | 2.878812 | 0.059869  | 0.037730  | -0.018227 |
| H | 3.090587  | 1.606491  | 3.487978 | -0.059872 | -0.037730 | 0.018210  |
| H | 5.245016  | 5.294309  | 0.304583 | 0.059877  | -0.037730 | -0.018220 |
| H | -2.791874 | 8.507292  | 6.062207 | -0.059873 | 0.037720  | 0.018233  |

100 f = 14.315915 THz 89.949547 2PiTHz 477.527510 cm-1 59.205887  
meV

|    | X         | Y         | Z        | dx        | dy        | dz        |
|----|-----------|-----------|----------|-----------|-----------|-----------|
| Li | 3.769818  | 9.645336  | 4.001386 | 0.115073  | -0.039846 | 0.078029  |
| Li | -1.316675 | 4.156264  | 2.365404 | 0.115089  | -0.039855 | 0.078063  |
| Li | -3.471104 | 2.744536  | 5.548798 | -0.115069 | -0.039835 | -0.078031 |
| Li | 5.924247  | 11.057064 | 0.817991 | -0.115078 | -0.039832 | -0.078030 |
| Na | 2.049025  | 6.784862  | 1.629696 | -0.000804 | 0.000349  | -0.000702 |
| Na | 0.404117  | 7.016739  | 4.737094 | -0.000804 | 0.000350  | -0.000720 |
| Na | 2.558546  | 13.685662 | 1.553699 | 0.000805  | 0.000352  | 0.000719  |
| Na | -0.105403 | 0.115939  | 4.813091 | 0.000805  | 0.000348  | 0.000703  |
| B  | 4.155007  | 8.978944  | 1.168663 | 0.004404  | 0.004927  | 0.024753  |
| B  | -1.701865 | 4.822656  | 5.198127 | 0.004410  | 0.004923  | 0.024751  |
| B  | 0.452564  | 2.078144  | 2.014732 | -0.004425 | 0.004937  | -0.024750 |
| B  | 2.000578  | 11.723457 | 4.352058 | -0.004405 | 0.004929  | -0.024753 |
| B  | -2.733891 | 11.746082 | 5.839177 | -0.016562 | -0.008313 | -0.014054 |
| B  | 5.187034  | 2.055518  | 0.527613 | -0.016563 | -0.008324 | -0.014074 |
| B  | 3.032605  | 4.845282  | 3.711007 | 0.016560  | -0.008302 | 0.014045  |
| B  | -0.579463 | 8.956318  | 2.655782 | 0.016562  | -0.008316 | 0.014061  |
| B  | -0.983708 | 0.054306  | 1.827988 | 0.011294  | 0.001966  | 0.023099  |
| B  | 3.436850  | 13.747295 | 4.538802 | 0.011292  | 0.001967  | 0.023090  |
| B  | 5.591279  | 6.955106  | 1.355407 | -0.011293 | 0.001970  | -0.023099 |
| B  | -3.138137 | 6.846495  | 5.011383 | -0.011286 | 0.001972  | -0.023080 |
| Si | 0.631772  | 3.486686  | 4.508512 | -0.001876 | 0.007837  | -0.014513 |
| Si | 1.821370  | 10.314915 | 1.858278 | -0.001893 | 0.007827  | -0.014508 |
| Si | -0.333059 | 10.387486 | 5.041673 | 0.001890  | 0.007833  | 0.014514  |
| Si | 2.786201  | 3.414115  | 1.325117 | 0.001903  | 0.007815  | 0.014507  |
| O  | 0.061445  | 3.072947  | 3.041906 | 0.005639  | -0.016694 | -0.001547 |
| O  | 2.391697  | 10.728653 | 3.324884 | 0.005643  | -0.016688 | -0.001554 |
| O  | 4.546126  | 9.973747  | 0.141489 | -0.005640 | -0.016698 | 0.001553  |
| O  | -2.092984 | 3.827853  | 6.225301 | -0.005650 | -0.016697 | 0.001557  |
| O  | 2.197450  | 3.933608  | 4.519003 | 0.002006  | -0.010492 | -0.005423 |
| O  | 0.255692  | 9.867992  | 1.847787 | 0.002001  | -0.010513 | -0.005417 |
| O  | -1.898737 | 10.834409 | 5.031182 | -0.002001 | -0.010504 | 0.005419  |
| O  | 4.351879  | 2.967192  | 1.335608 | -0.001989 | -0.010507 | 0.005415  |

|   |           |           |          |           |           |           |
|---|-----------|-----------|----------|-----------|-----------|-----------|
| O | -0.212316 | 4.798696  | 5.055280 | 0.016608  | 0.024164  | -0.014814 |
| O | 2.665458  | 9.002905  | 1.311510 | 0.016598  | 0.024172  | -0.014832 |
| O | 0.511030  | 11.699496 | 4.494905 | -0.016606 | 0.024180  | 0.014831  |
| O | 1.942113  | 2.102105  | 1.871885 | -0.016620 | 0.024178  | 0.014824  |
| O | 0.525580  | 2.169271  | 5.472081 | 0.004758  | -0.015059 | -0.031526 |
| O | 1.927562  | 11.632329 | 0.894709 | 0.004775  | -0.015063 | -0.031512 |
| O | -0.226867 | 9.070071  | 4.078104 | -0.004770 | -0.015062 | 0.031518  |
| O | 2.680009  | 4.731529  | 2.288686 | -0.004790 | -0.015055 | 0.031501  |
| O | 0.058846  | 0.698526  | 2.444964 | 0.004425  | 0.015694  | 0.016541  |
| O | 2.394296  | 13.103075 | 3.921826 | 0.004418  | 0.015702  | 0.016529  |
| O | 4.548725  | 7.599326  | 0.738431 | -0.004422 | 0.015702  | -0.016538 |
| O | -2.095583 | 6.202275  | 5.628359 | -0.004409 | 0.015700  | -0.016536 |
| O | -2.459230 | 13.184059 | 5.445139 | 0.015174  | -0.000032 | 0.015799  |
| O | 4.912372  | 0.617542  | 0.921651 | 0.015174  | -0.000035 | 0.015814  |
| O | 2.757943  | 6.283259  | 4.105046 | -0.015178 | -0.000032 | -0.015788 |
| O | -0.304801 | 7.518342  | 2.261744 | -0.015173 | -0.000037 | -0.015806 |
| O | -0.175430 | 2.374756  | 0.744070 | -0.016445 | 0.009430  | -0.021088 |
| O | 2.628573  | 11.426844 | 5.622720 | -0.016433 | 0.009429  | -0.021081 |
| O | 4.783002  | 9.275557  | 2.439325 | 0.016434  | 0.009438  | 0.021079  |
| O | -2.329859 | 4.526044  | 3.927465 | 0.016430  | 0.009422  | 0.021079  |
| O | -1.223866 | 12.517207 | 2.155216 | -0.004824 | -0.000633 | -0.000143 |
| O | 3.677009  | 1.284394  | 4.211574 | -0.004825 | -0.000628 | -0.000133 |
| O | 5.831438  | 5.616407  | 1.028179 | 0.004823  | -0.000626 | 0.000133  |
| O | -3.378295 | 8.185194  | 5.338611 | 0.004819  | -0.000620 | 0.000131  |
| H | -0.637445 | 12.195109 | 2.878812 | -0.009233 | -0.034500 | -0.012889 |
| H | 3.090587  | 1.606491  | 3.487978 | -0.009230 | -0.034486 | -0.012877 |
| H | 5.245016  | 5.294309  | 0.304583 | 0.009223  | -0.034491 | 0.012886  |
| H | -2.791874 | 8.507292  | 6.062207 | 0.009198  | -0.034472 | 0.012895  |

101 f = 14.188759 THz      89.150603 2PiTHz      473.286047 cm-1      58.680012 meV

|    | X         | Y         | Z        | dx       | dy        | dz       |
|----|-----------|-----------|----------|----------|-----------|----------|
| Li | 3.769818  | 9.645336  | 4.001386 | 0.021802 | -0.029798 | 0.045582 |
| Li | -1.316675 | 4.156264  | 2.365404 | 0.021553 | -0.029698 | 0.045375 |
| Li | -3.471104 | 2.744536  | 5.548798 | 0.021551 | 0.029759  | 0.045348 |
| Li | 5.924247  | 11.057064 | 0.817991 | 0.021882 | 0.029780  | 0.045642 |

|    |           |           |          |           |           |           |
|----|-----------|-----------|----------|-----------|-----------|-----------|
| Na | 2.049025  | 6.784862  | 1.629696 | 0.001713  | 0.000623  | 0.000334  |
| Na | 0.404117  | 7.016739  | 4.737094 | 0.001717  | 0.000590  | 0.000376  |
| Na | 2.558546  | 13.685662 | 1.553699 | 0.001717  | -0.000592 | 0.000375  |
| Na | -0.105403 | 0.115939  | 4.813091 | 0.001714  | -0.000619 | 0.000335  |
| B  | 4.155007  | 8.978944  | 1.168663 | -0.027617 | -0.027312 | 0.003492  |
| B  | -1.701865 | 4.822656  | 5.198127 | -0.027480 | -0.027204 | 0.003473  |
| B  | 0.452564  | 2.078144  | 2.014732 | -0.027483 | 0.027209  | 0.003480  |
| B  | 2.000578  | 11.723457 | 4.352058 | -0.027612 | 0.027313  | 0.003510  |
| B  | -2.733891 | 11.746082 | 5.839177 | -0.001561 | -0.022769 | -0.030882 |
| B  | 5.187034  | 2.055518  | 0.527613 | -0.001542 | -0.022661 | -0.030698 |
| B  | 3.032605  | 4.845282  | 3.711007 | -0.001539 | 0.022646  | -0.030705 |
| B  | -0.579463 | 8.956318  | 2.655782 | -0.001573 | 0.022779  | -0.030884 |
| B  | -0.983708 | 0.054306  | 1.827988 | 0.015558  | -0.008195 | 0.018902  |
| B  | 3.436850  | 13.747295 | 4.538802 | 0.015635  | -0.008215 | 0.019031  |
| B  | 5.591279  | 6.955106  | 1.355407 | 0.015653  | 0.008204  | 0.019035  |
| B  | -3.138137 | 6.846495  | 5.011383 | 0.015546  | 0.008219  | 0.018921  |
| Si | 0.631772  | 3.486686  | 4.508512 | 0.033563  | 0.032707  | 0.003316  |
| Si | 1.821370  | 10.314915 | 1.858278 | 0.033668  | 0.032896  | 0.003349  |
| Si | -0.333059 | 10.387486 | 5.041673 | 0.033675  | -0.032897 | 0.003340  |
| Si | 2.786201  | 3.414115  | 1.325117 | 0.033548  | -0.032717 | 0.003298  |
| O  | 0.061445  | 3.072947  | 3.041906 | -0.012764 | 0.008300  | 0.020441  |
| O  | 2.391697  | 10.728653 | 3.324884 | -0.012817 | 0.008331  | 0.020541  |
| O  | 4.546126  | 9.973747  | 0.141489 | -0.012824 | -0.008321 | 0.020544  |
| O  | -2.092984 | 3.827853  | 6.225301 | -0.012761 | -0.008285 | 0.020431  |
| O  | 2.197450  | 3.933608  | 4.519003 | 0.024408  | 0.007979  | -0.016350 |
| O  | 0.255692  | 9.867992  | 1.847787 | 0.024471  | 0.008070  | -0.016445 |
| O  | -1.898737 | 10.834409 | 5.031182 | 0.024479  | -0.008063 | -0.016452 |
| O  | 4.351879  | 2.967192  | 1.335608 | 0.024396  | -0.007989 | -0.016350 |
| O  | -0.212316 | 4.798696  | 5.055280 | -0.032604 | -0.017995 | -0.007243 |
| O  | 2.665458  | 9.002905  | 1.311510 | -0.032777 | -0.018057 | -0.007248 |
| O  | 0.511030  | 11.699496 | 4.494905 | -0.032763 | 0.018043  | -0.007255 |
| O  | 1.942113  | 2.102105  | 1.871885 | -0.032615 | 0.018002  | -0.007237 |
| O  | 0.525580  | 2.169271  | 5.472081 | -0.030960 | 0.002268  | -0.024301 |
| O  | 1.927562  | 11.632329 | 0.894709 | -0.031114 | 0.002244  | -0.024469 |
| O  | -0.226867 | 9.070071  | 4.078104 | -0.031102 | -0.002245 | -0.024479 |
| O  | 2.680009  | 4.731529  | 2.288686 | -0.030973 | -0.002276 | -0.024306 |

|   |           |           |          |           |           |           |
|---|-----------|-----------|----------|-----------|-----------|-----------|
| O | 0.058846  | 0.698526  | 2.444964 | 0.019313  | -0.002291 | 0.002657  |
| O | 2.394296  | 13.103075 | 3.921826 | 0.019434  | -0.002307 | 0.002679  |
| O | 4.548725  | 7.599326  | 0.738431 | 0.019446  | 0.002293  | 0.002693  |
| O | -2.095583 | 6.202275  | 5.628359 | 0.019293  | 0.002292  | 0.002661  |
| O | -2.459230 | 13.184059 | 5.445139 | 0.003450  | 0.000053  | 0.031792  |
| O | 4.912372  | 0.617542  | 0.921651 | 0.003417  | 0.000042  | 0.031624  |
| O | 2.757943  | 6.283259  | 4.105046 | 0.003427  | -0.000042 | 0.031638  |
| O | -0.304801 | 7.518342  | 2.261744 | 0.003464  | -0.000050 | 0.031790  |
| O | -0.175430 | 2.374756  | 0.744070 | -0.020386 | 0.009937  | -0.010191 |
| O | 2.628573  | 11.426844 | 5.622720 | -0.020478 | 0.009997  | -0.010244 |
| O | 4.783002  | 9.275557  | 2.439325 | -0.020487 | -0.009982 | -0.010262 |
| O | -2.329859 | 4.526044  | 3.927465 | -0.020386 | -0.009983 | -0.010187 |
| O | -1.223866 | 12.517207 | 2.155216 | -0.007748 | -0.017648 | -0.018730 |
| O | 3.677009  | 1.284394  | 4.211574 | -0.007823 | -0.017696 | -0.018766 |
| O | 5.831438  | 5.616407  | 1.028179 | -0.007816 | 0.017677  | -0.018764 |
| O | -3.378295 | 8.185194  | 5.338611 | -0.007752 | 0.017684  | -0.018722 |
| H | -0.637445 | 12.195109 | 2.878812 | -0.068766 | -0.037392 | 0.023195  |
| H | 3.090587  | 1.606491  | 3.487978 | -0.068825 | -0.037617 | 0.023059  |
| H | 5.245016  | 5.294309  | 0.304583 | -0.068846 | 0.037606  | 0.023078  |
| H | -2.791874 | 8.507292  | 6.062207 | -0.068748 | 0.037439  | 0.023184  |

102 f = 14.176299 THz 89.072316 2PiTHz 472.870435 cm-1 58.628483 meV

|    | X         | Y         | Z        | dx        | dy        | dz        |
|----|-----------|-----------|----------|-----------|-----------|-----------|
| Li | 3.769818  | 9.645336  | 4.001386 | 0.059962  | -0.013596 | 0.049578  |
| Li | -1.316675 | 4.156264  | 2.365404 | -0.060027 | 0.013739  | -0.049808 |
| Li | -3.471104 | 2.744536  | 5.548798 | -0.060081 | -0.013760 | -0.049819 |
| Li | 5.924247  | 11.057064 | 0.817991 | 0.059913  | 0.013590  | 0.049566  |
| Na | 2.049025  | 6.784862  | 1.629696 | 0.000244  | 0.005347  | -0.004453 |
| Na | 0.404117  | 7.016739  | 4.737094 | -0.000250 | -0.005339 | 0.004469  |
| Na | 2.558546  | 13.685662 | 1.553699 | -0.000249 | 0.005349  | 0.004470  |
| Na | -0.105403 | 0.115939  | 4.813091 | 0.000245  | -0.005342 | -0.004454 |
| B  | 4.155007  | 8.978944  | 1.168663 | -0.026421 | -0.021494 | 0.005443  |
| B  | -1.701865 | 4.822656  | 5.198127 | 0.026568  | 0.021637  | -0.005455 |
| B  | 0.452564  | 2.078144  | 2.014732 | 0.026565  | -0.021639 | -0.005469 |
| B  | 2.000578  | 11.723457 | 4.352058 | -0.026423 | 0.021504  | 0.005438  |



|    |           |           |          |           |           |           |
|----|-----------|-----------|----------|-----------|-----------|-----------|
| B  | -2.733891 | 11.746082 | 5.839177 | -0.004565 | -0.024590 | -0.035030 |
| B  | 5.187034  | 2.055518  | 0.527613 | 0.004569  | 0.024709  | 0.035187  |
| B  | 3.032605  | 4.845282  | 3.711007 | 0.004577  | -0.024708 | 0.035192  |
| B  | -0.579463 | 8.956318  | 2.655782 | -0.004559 | 0.024576  | -0.035029 |
| B  | -0.983708 | 0.054306  | 1.827988 | -0.017912 | -0.000808 | -0.022406 |
| B  | 3.436850  | 13.747295 | 4.538802 | 0.017831  | 0.000850  | 0.022334  |
| B  | 5.591279  | 6.955106  | 1.355407 | 0.017828  | -0.000846 | 0.022327  |
| B  | -3.138137 | 6.846495  | 5.011383 | -0.017918 | 0.000804  | -0.022420 |
| Si | 0.631772  | 3.486686  | 4.508512 | -0.021283 | -0.035782 | -0.008374 |
| Si | 1.821370  | 10.314915 | 1.858278 | 0.021121  | 0.035613  | 0.008342  |
| Si | -0.333059 | 10.387486 | 5.041673 | 0.021119  | -0.035615 | 0.008332  |
| Si | 2.786201  | 3.414115  | 1.325117 | -0.021286 | 0.035789  | -0.008362 |
| O  | 0.061445  | 3.072947  | 3.041906 | 0.009321  | -0.008064 | -0.020129 |
| O  | 2.391697  | 10.728653 | 3.324884 | -0.009273 | 0.008008  | 0.020027  |
| O  | 4.546126  | 9.973747  | 0.141489 | -0.009282 | -0.008002 | 0.020023  |
| O  | -2.092984 | 3.827853  | 6.225301 | 0.009319  | 0.008050  | -0.020127 |
| O  | 2.197450  | 3.933608  | 4.519003 | -0.013407 | -0.015937 | 0.021278  |
| O  | 0.255692  | 9.867992  | 1.847787 | 0.013292  | 0.015891  | -0.021176 |
| O  | -1.898737 | 10.834409 | 5.031182 | 0.013288  | -0.015903 | -0.021181 |
| O  | 4.351879  | 2.967192  | 1.335608 | -0.013412 | 0.015936  | 0.021279  |
| O  | -0.212316 | 4.798696  | 5.055280 | 0.032374  | 0.009681  | 0.002741  |
| O  | 2.665458  | 9.002905  | 1.311510 | -0.032194 | -0.009581 | -0.002720 |
| O  | 0.511030  | 11.699496 | 4.494905 | -0.032207 | 0.009598  | -0.002706 |
| O  | 1.942113  | 2.102105  | 1.871885 | 0.032365  | -0.009673 | 0.002747  |
| O  | 0.525580  | 2.169271  | 5.472081 | 0.027935  | 0.004700  | 0.032201  |
| O  | 1.927562  | 11.632329 | 0.894709 | -0.027776 | -0.004716 | -0.032086 |
| O  | -0.226867 | 9.070071  | 4.078104 | -0.027776 | 0.004699  | -0.032076 |
| O  | 2.680009  | 4.731529  | 2.288686 | 0.027939  | -0.004700 | 0.032215  |
| O  | 0.058846  | 0.698526  | 2.444964 | -0.027252 | 0.001370  | -0.004648 |
| O  | 2.394296  | 13.103075 | 3.921826 | 0.027151  | -0.001350 | 0.004644  |
| O  | 4.548725  | 7.599326  | 0.738431 | 0.027142  | 0.001352  | 0.004646  |
| O  | -2.095583 | 6.202275  | 5.628359 | -0.027255 | -0.001367 | -0.004658 |
| O  | -2.459230 | 13.184059 | 5.445139 | 0.006232  | 0.001638  | 0.030039  |
| O  | 4.912372  | 0.617542  | 0.921651 | -0.006245 | -0.001637 | -0.030182 |
| O  | 2.757943  | 6.283259  | 4.105046 | -0.006259 | 0.001637  | -0.030194 |
| O  | -0.304801 | 7.518342  | 2.261744 | 0.006236  | -0.001638 | 0.030028  |

|   |           |           |          |           |           |           |
|---|-----------|-----------|----------|-----------|-----------|-----------|
| O | -0.175430 | 2.374756  | 0.744070 | 0.019175  | -0.004013 | 0.012304  |
| O | 2.628573  | 11.426844 | 5.622720 | -0.019069 | 0.003976  | -0.012267 |
| O | 4.783002  | 9.275557  | 2.439325 | -0.019066 | -0.003983 | -0.012255 |
| O | -2.329859 | 4.526044  | 3.927465 | 0.019181  | 0.004024  | 0.012316  |
| O | -1.223866 | 12.517207 | 2.155216 | 0.014029  | 0.001865  | 0.007215  |
| O | 3.677009  | 1.284394  | 4.211574 | -0.013997 | -0.001786 | -0.007122 |
| O | 5.831438  | 5.616407  | 1.028179 | -0.013984 | 0.001790  | -0.007115 |
| O | -3.378295 | 8.185194  | 5.338611 | 0.014034  | -0.001873 | 0.007217  |
| H | -0.637445 | 12.195109 | 2.878812 | 0.009809  | 0.036716  | 0.028250  |
| H | 3.090587  | 1.606491  | 3.487978 | -0.009457 | -0.036546 | -0.028383 |
| H | 5.245016  | 5.294309  | 0.304583 | -0.009436 | 0.036534  | -0.028375 |
| H | -2.791874 | 8.507292  | 6.062207 | 0.009825  | -0.036735 | 0.028248  |

103 f = 13.807800 THz 86.756967 2PiTHz 460.578621 cm-1 57.104492  
meV

|    | X         | Y         | Z        | dx        | dy        | dz        |
|----|-----------|-----------|----------|-----------|-----------|-----------|
| Li | 3.769818  | 9.645336  | 4.001386 | 0.048231  | 0.073782  | 0.058919  |
| Li | -1.316675 | 4.156264  | 2.365404 | -0.047994 | -0.073660 | -0.058942 |
| Li | -3.471104 | 2.744536  | 5.548798 | 0.048195  | -0.073781 | 0.058965  |
| Li | 5.924247  | 11.057064 | 0.817991 | -0.048036 | 0.073672  | -0.058907 |
| Na | 2.049025  | 6.784862  | 1.629696 | 0.000492  | -0.003998 | 0.001092  |
| Na | 0.404117  | 7.016739  | 4.737094 | -0.000491 | 0.003980  | -0.001063 |
| Na | 2.558546  | 13.685662 | 1.553699 | 0.000489  | 0.003995  | 0.001065  |
| Na | -0.105403 | 0.115939  | 4.813091 | -0.000492 | -0.003982 | -0.001089 |
| B  | 4.155007  | 8.978944  | 1.168663 | 0.011020  | 0.001089  | -0.002423 |
| B  | -1.701865 | 4.822656  | 5.198127 | -0.011077 | -0.001106 | 0.002446  |
| B  | 0.452564  | 2.078144  | 2.014732 | 0.011027  | -0.001097 | -0.002414 |
| B  | 2.000578  | 11.723457 | 4.352058 | -0.011066 | 0.001103  | 0.002442  |
| B  | -2.733891 | 11.746082 | 5.839177 | -0.015138 | -0.009707 | 0.007865  |
| B  | 5.187034  | 2.055518  | 0.527613 | 0.015098  | 0.009662  | -0.007920 |
| B  | 3.032605  | 4.845282  | 3.711007 | -0.015136 | 0.009713  | 0.007872  |
| B  | -0.579463 | 8.956318  | 2.655782 | 0.015111  | -0.009673 | -0.007903 |
| B  | -0.983708 | 0.054306  | 1.827988 | -0.023655 | -0.024366 | 0.015535  |
| B  | 3.436850  | 13.747295 | 4.538802 | 0.023720  | 0.024481  | -0.015560 |
| B  | 5.591279  | 6.955106  | 1.355407 | -0.023669 | 0.024415  | 0.015545  |
| B  | -3.138137 | 6.846495  | 5.011383 | 0.023721  | -0.024464 | -0.015555 |

|    |           |           |          |           |           |           |
|----|-----------|-----------|----------|-----------|-----------|-----------|
| Si | 0.631772  | 3.486686  | 4.508512 | -0.028888 | 0.014133  | -0.014350 |
| Si | 1.821370  | 10.314915 | 1.858278 | 0.028863  | -0.014088 | 0.014433  |
| Si | -0.333059 | 10.387486 | 5.041673 | -0.028886 | -0.014136 | -0.014367 |
| Si | 2.786201  | 3.414115  | 1.325117 | 0.028852  | 0.014073  | 0.014449  |
| O  | 0.061445  | 3.072947  | 3.041906 | -0.002941 | -0.004148 | -0.015030 |
| O  | 2.391697  | 10.728653 | 3.324884 | 0.002945  | 0.004145  | 0.015087  |
| O  | 4.546126  | 9.973747  | 0.141489 | -0.002942 | 0.004127  | -0.015047 |
| O  | -2.092984 | 3.827853  | 6.225301 | 0.002955  | -0.004158 | 0.015091  |
| O  | 2.197450  | 3.933608  | 4.519003 | -0.018443 | 0.002200  | 0.000962  |
| O  | 0.255692  | 9.867992  | 1.847787 | 0.018420  | -0.002180 | -0.000999 |
| O  | -1.898737 | 10.834409 | 5.031182 | -0.018441 | -0.002209 | 0.000973  |
| O  | 4.351879  | 2.967192  | 1.335608 | 0.018410  | 0.002164  | -0.001006 |
| O  | -0.212316 | 4.798696  | 5.055280 | -0.025454 | -0.012510 | 0.011141  |
| O  | 2.665458  | 9.002905  | 1.311510 | 0.025388  | 0.012554  | -0.011194 |
| O  | 0.511030  | 11.699496 | 4.494905 | -0.025455 | 0.012524  | 0.011151  |
| O  | 1.942113  | 2.102105  | 1.871885 | 0.025377  | -0.012564 | -0.011204 |
| O  | 0.525580  | 2.169271  | 5.472081 | -0.001589 | 0.010779  | -0.000860 |
| O  | 1.927562  | 11.632329 | 0.894709 | 0.001605  | -0.010839 | 0.000792  |
| O  | -0.226867 | 9.070071  | 4.078104 | -0.001586 | -0.010795 | -0.000846 |
| O  | 2.680009  | 4.731529  | 2.288686 | 0.001614  | 0.010846  | 0.000789  |
| O  | 0.058846  | 0.698526  | 2.444964 | -0.027228 | -0.001751 | -0.002383 |
| O  | 2.394296  | 13.103075 | 3.921826 | 0.027334  | 0.001758  | 0.002398  |
| O  | 4.548725  | 7.599326  | 0.738431 | -0.027247 | 0.001764  | -0.002393 |
| O  | -2.095583 | 6.202275  | 5.628359 | 0.027343  | -0.001744 | 0.002389  |
| O  | -2.459230 | 13.184059 | 5.445139 | 0.006704  | 0.000635  | -0.014188 |
| O  | 4.912372  | 0.617542  | 0.921651 | -0.006702 | -0.000608 | 0.014171  |
| O  | 2.757943  | 6.283259  | 4.105046 | 0.006701  | -0.000624 | -0.014182 |
| O  | -0.304801 | 7.518342  | 2.261744 | -0.006702 | 0.000623  | 0.014181  |
| O  | -0.175430 | 2.374756  | 0.744070 | 0.003262  | 0.050487  | 0.013672  |
| O  | 2.628573  | 11.426844 | 5.622720 | -0.003298 | -0.050605 | -0.013690 |
| O  | 4.783002  | 9.275557  | 2.439325 | 0.003262  | -0.050537 | 0.013681  |
| O  | -2.329859 | 4.526044  | 3.927465 | -0.003308 | 0.050600  | -0.013682 |
| O  | -1.223866 | 12.517207 | 2.155216 | 0.001330  | -0.040136 | 0.008170  |
| O  | 3.677009  | 1.284394  | 4.211574 | -0.001314 | 0.040284  | -0.008198 |
| O  | 5.831438  | 5.616407  | 1.028179 | 0.001308  | 0.040188  | 0.008180  |
| O  | -3.378295 | 8.185194  | 5.338611 | -0.001330 | -0.040277 | -0.008188 |

|   |           |           |          |           |           |           |
|---|-----------|-----------|----------|-----------|-----------|-----------|
| H | -0.637445 | 12.195109 | 2.878812 | 0.023048  | -0.038062 | -0.005966 |
| H | 3.090587  | 1.606491  | 3.487978 | -0.023113 | 0.038188  | 0.005994  |
| H | 5.245016  | 5.294309  | 0.304583 | 0.023037  | 0.038117  | -0.005967 |
| H | -2.791874 | 8.507292  | 6.062207 | -0.023118 | -0.038166 | 0.005985  |

104 f = 13.778004 THz 86.569753 2PiTHz 459.584731 cm-1 56.981265 meV

|    | X         | Y         | Z        | dx        | dy        | dz        |
|----|-----------|-----------|----------|-----------|-----------|-----------|
| Li | 3.769818  | 9.645336  | 4.001386 | 0.067203  | 0.045755  | 0.001719  |
| Li | -1.316675 | 4.156264  | 2.365404 | 0.067339  | 0.045904  | 0.001860  |
| Li | -3.471104 | 2.744536  | 5.548798 | 0.067206  | -0.045782 | 0.001731  |
| Li | 5.924247  | 11.057064 | 0.817991 | 0.067332  | -0.045979 | 0.001918  |
| Na | 2.049025  | 6.784862  | 1.629696 | -0.000470 | -0.007106 | 0.001623  |
| Na | 0.404117  | 7.016739  | 4.737094 | -0.000468 | -0.007101 | 0.001592  |
| Na | 2.558546  | 13.685662 | 1.553699 | -0.000469 | 0.007104  | 0.001589  |
| Na | -0.105403 | 0.115939  | 4.813091 | -0.000470 | 0.007106  | 0.001625  |
| B  | 4.155007  | 8.978944  | 1.168663 | -0.012064 | 0.002714  | 0.009947  |
| B  | -1.701865 | 4.822656  | 5.198127 | -0.012030 | 0.002722  | 0.009934  |
| B  | 0.452564  | 2.078144  | 2.014732 | -0.012063 | -0.002717 | 0.009937  |
| B  | 2.000578  | 11.723457 | 4.352058 | -0.012027 | -0.002714 | 0.009933  |
| B  | -2.733891 | 11.746082 | 5.839177 | -0.015018 | -0.012390 | -0.009111 |
| B  | 5.187034  | 2.055518  | 0.527613 | -0.015062 | -0.012412 | -0.009077 |
| B  | 3.032605  | 4.845282  | 3.711007 | -0.015027 | 0.012387  | -0.009098 |
| B  | -0.579463 | 8.956318  | 2.655782 | -0.015065 | 0.012418  | -0.009085 |
| B  | -0.983708 | 0.054306  | 1.827988 | 0.017836  | 0.033109  | -0.012421 |
| B  | 3.436850  | 13.747295 | 4.538802 | 0.017768  | 0.033047  | -0.012362 |
| B  | 5.591279  | 6.955106  | 1.355407 | 0.017836  | -0.033131 | -0.012416 |
| B  | -3.138137 | 6.846495  | 5.011383 | 0.017781  | -0.033062 | -0.012382 |
| Si | 0.631772  | 3.486686  | 4.508512 | -0.018758 | 0.013390  | 0.031123  |
| Si | 1.821370  | 10.314915 | 1.858278 | -0.018830 | 0.013438  | 0.031081  |
| Si | -0.333059 | 10.387486 | 5.041673 | -0.018729 | -0.013401 | 0.031130  |
| Si | 2.786201  | 3.414115  | 1.325117 | -0.018804 | -0.013421 | 0.031101  |
| O  | 0.061445  | 3.072947  | 3.041906 | 0.009361  | 0.002423  | 0.015309  |
| O  | 2.391697  | 10.728653 | 3.324884 | 0.009350  | 0.002400  | 0.015273  |
| O  | 4.546126  | 9.973747  | 0.141489 | 0.009359  | -0.002414 | 0.015328  |
| O  | -2.092984 | 3.827853  | 6.225301 | 0.009365  | -0.002399 | 0.015286  |

|   |           |           |          |           |           |           |
|---|-----------|-----------|----------|-----------|-----------|-----------|
| O | 2.197450  | 3.933608  | 4.519003 | -0.016637 | 0.010392  | -0.012200 |
| O | 0.255692  | 9.867992  | 1.847787 | -0.016679 | 0.010394  | -0.012193 |
| O | -1.898737 | 10.834409 | 5.031182 | -0.016618 | -0.010397 | -0.012207 |
| O | 4.351879  | 2.967192  | 1.335608 | -0.016656 | -0.010373 | -0.012186 |
| O | -0.212316 | 4.798696  | 5.055280 | -0.017920 | 0.021099  | -0.017769 |
| O | 2.665458  | 9.002905  | 1.311510 | -0.018007 | 0.021065  | -0.017763 |
| O | 0.511030  | 11.699496 | 4.494905 | -0.017922 | -0.021108 | -0.017793 |
| O | 1.942113  | 2.102105  | 1.871885 | -0.017986 | -0.021061 | -0.017757 |
| O | 0.525580  | 2.169271  | 5.472081 | 0.014766  | -0.022084 | -0.018898 |
| O | 1.927562  | 11.632329 | 0.894709 | 0.014739  | -0.022055 | -0.018909 |
| O | -0.226867 | 9.070071  | 4.078104 | 0.014752  | 0.022081  | -0.018905 |
| O | 2.680009  | 4.731529  | 2.288686 | 0.014756  | 0.022057  | -0.018895 |
| O | 0.058846  | 0.698526  | 2.444964 | 0.032287  | -0.000848 | -0.000348 |
| O | 2.394296  | 13.103075 | 3.921826 | 0.032219  | -0.000849 | -0.000353 |
| O | 4.548725  | 7.599326  | 0.738431 | 0.032306  | 0.000850  | -0.000355 |
| O | -2.095583 | 6.202275  | 5.628359 | 0.032235  | 0.000855  | -0.000356 |
| O | -2.459230 | 13.184059 | 5.445139 | -0.002677 | 0.006177  | -0.009923 |
| O | 4.912372  | 0.617542  | 0.921651 | -0.002649 | 0.006180  | -0.009982 |
| O | 2.757943  | 6.283259  | 4.105046 | -0.002676 | -0.006171 | -0.009951 |
| O | -0.304801 | 7.518342  | 2.261744 | -0.002655 | -0.006184 | -0.009977 |
| O | -0.175430 | 2.374756  | 0.744070 | -0.010268 | -0.038406 | -0.001760 |
| O | 2.628573  | 11.426844 | 5.622720 | -0.010253 | -0.038262 | -0.001736 |
| O | 4.783002  | 9.275557  | 2.439325 | -0.010259 | 0.038440  | -0.001779 |
| O | -2.329859 | 4.526044  | 3.927465 | -0.010249 | 0.038309  | -0.001741 |
| O | -1.223866 | 12.517207 | 2.155216 | 0.002428  | 0.050469  | -0.004405 |
| O | 3.677009  | 1.284394  | 4.211574 | 0.002427  | 0.050360  | -0.004384 |
| O | 5.831438  | 5.616407  | 1.028179 | 0.002423  | -0.050496 | -0.004396 |
| O | -3.378295 | 8.185194  | 5.338611 | 0.002429  | -0.050387 | -0.004387 |
| H | -0.637445 | 12.195109 | 2.878812 | -0.010818 | 0.044212  | 0.002953  |
| H | 3.090587  | 1.606491  | 3.487978 | -0.010768 | 0.044094  | 0.002935  |
| H | 5.245016  | 5.294309  | 0.304583 | -0.010822 | -0.044222 | 0.002952  |
| H | -2.791874 | 8.507292  | 6.062207 | -0.010762 | -0.044126 | 0.002931  |

105 f = 13.559958 THz      85.199728 2PiTHz      452.311494 cm-1      56.079498 meV

X                      Y                      Z                      dx                      dy                      dz

|    |           |           |          |           |           |           |
|----|-----------|-----------|----------|-----------|-----------|-----------|
| Li | 3.769818  | 9.645336  | 4.001386 | -0.003152 | 0.068288  | 0.064612  |
| Li | -1.316675 | 4.156264  | 2.365404 | -0.003127 | 0.068284  | 0.064686  |
| Li | -3.471104 | 2.744536  | 5.548798 | 0.003193  | 0.068239  | -0.064684 |
| Li | 5.924247  | 11.057064 | 0.817991 | 0.003186  | 0.068263  | -0.064643 |
| Na | 2.049025  | 6.784862  | 1.629696 | -0.000171 | -0.001280 | -0.000386 |
| Na | 0.404117  | 7.016739  | 4.737094 | -0.000177 | -0.001276 | -0.000356 |
| Na | 2.558546  | 13.685662 | 1.553699 | 0.000172  | -0.001280 | 0.000354  |
| Na | -0.105403 | 0.115939  | 4.813091 | 0.000175  | -0.001265 | 0.000390  |
| B  | 4.155007  | 8.978944  | 1.168663 | 0.007270  | -0.001954 | -0.003973 |
| B  | -1.701865 | 4.822656  | 5.198127 | 0.007276  | -0.001924 | -0.003972 |
| B  | 0.452564  | 2.078144  | 2.014732 | -0.007275 | -0.001942 | 0.003993  |
| B  | 2.000578  | 11.723457 | 4.352058 | -0.007278 | -0.001947 | 0.003964  |
| B  | -2.733891 | 11.746082 | 5.839177 | -0.011216 | -0.002107 | 0.004693  |
| B  | 5.187034  | 2.055518  | 0.527613 | -0.011250 | -0.002146 | 0.004697  |
| B  | 3.032605  | 4.845282  | 3.711007 | 0.011210  | -0.002114 | -0.004705 |
| B  | -0.579463 | 8.956318  | 2.655782 | 0.011236  | -0.002126 | -0.004687 |
| B  | -0.983708 | 0.054306  | 1.827988 | 0.014033  | 0.028012  | -0.013634 |
| B  | 3.436850  | 13.747295 | 4.538802 | 0.014001  | 0.027930  | -0.013587 |
| B  | 5.591279  | 6.955106  | 1.355407 | -0.014014 | 0.027986  | 0.013611  |
| B  | -3.138137 | 6.846495  | 5.011383 | -0.013997 | 0.027911  | 0.013584  |
| Si | 0.631772  | 3.486686  | 4.508512 | 0.037101  | -0.009570 | 0.019085  |
| Si | 1.821370  | 10.314915 | 1.858278 | 0.037137  | -0.009575 | 0.019010  |
| Si | -0.333059 | 10.387486 | 5.041673 | -0.037121 | -0.009579 | -0.019046 |
| Si | 2.786201  | 3.414115  | 1.325117 | -0.037154 | -0.009573 | -0.019007 |
| O  | 0.061445  | 3.072947  | 3.041906 | 0.007568  | -0.007120 | 0.021416  |
| O  | 2.391697  | 10.728653 | 3.324884 | 0.007537  | -0.007132 | 0.021382  |
| O  | 4.546126  | 9.973747  | 0.141489 | -0.007554 | -0.007147 | -0.021403 |
| O  | -2.092984 | 3.827853  | 6.225301 | -0.007529 | -0.007112 | -0.021384 |
| O  | 2.197450  | 3.933608  | 4.519003 | 0.025783  | -0.004405 | 0.000680  |
| O  | 0.255692  | 9.867992  | 1.847787 | 0.025815  | -0.004402 | 0.000717  |
| O  | -1.898737 | 10.834409 | 5.031182 | -0.025800 | -0.004395 | -0.000708 |
| O  | 4.351879  | 2.967192  | 1.335608 | -0.025832 | -0.004426 | -0.000703 |
| O  | -0.212316 | 4.798696  | 5.055280 | 0.017086  | 0.002073  | -0.007401 |
| O  | 2.665458  | 9.002905  | 1.311510 | 0.017098  | 0.002022  | -0.007352 |
| O  | 0.511030  | 11.699496 | 4.494905 | -0.017096 | 0.002037  | 0.007371  |
| O  | 1.942113  | 2.102105  | 1.871885 | -0.017103 | 0.002023  | 0.007358  |

|   |           |           |          |           |           |           |
|---|-----------|-----------|----------|-----------|-----------|-----------|
| O | 0.525580  | 2.169271  | 5.472081 | -0.001644 | -0.003299 | 0.007278  |
| O | 1.927562  | 11.632329 | 0.894709 | -0.001697 | -0.003243 | 0.007296  |
| O | -0.226867 | 9.070071  | 4.078104 | 0.001690  | -0.003273 | -0.007285 |
| O | 2.680009  | 4.731529  | 2.288686 | 0.001679  | -0.003239 | -0.007304 |
| O | 0.058846  | 0.698526  | 2.444964 | 0.022981  | -0.001972 | -0.001087 |
| O | 2.394296  | 13.103075 | 3.921826 | 0.022928  | -0.001984 | -0.001076 |
| O | 4.548725  | 7.599326  | 0.738431 | -0.022952 | -0.001972 | 0.001080  |
| O | -2.095583 | 6.202275  | 5.628359 | -0.022919 | -0.001984 | 0.001085  |
| O | -2.459230 | 13.184059 | 5.445139 | 0.002571  | -0.003119 | -0.020735 |
| O | 4.912372  | 0.617542  | 0.921651 | 0.002543  | -0.003119 | -0.020778 |
| O | 2.757943  | 6.283259  | 4.105046 | -0.002556 | -0.003130 | 0.020719  |
| O | -0.304801 | 7.518342  | 2.261744 | -0.002560 | -0.003110 | 0.020764  |
| O | -0.175430 | 2.374756  | 0.744070 | 0.005161  | -0.053095 | -0.016695 |
| O | 2.628573  | 11.426844 | 5.622720 | 0.005174  | -0.053007 | -0.016704 |
| O | 4.783002  | 9.275557  | 2.439325 | -0.005165 | -0.053062 | 0.016703  |
| O | -2.329859 | 4.526044  | 3.927465 | -0.005181 | -0.052993 | 0.016706  |
| O | -1.223866 | 12.517207 | 2.155216 | 0.001084  | 0.041450  | 0.000408  |
| O | 3.677009  | 1.284394  | 4.211574 | 0.001068  | 0.041333  | 0.000428  |
| O | 5.831438  | 5.616407  | 1.028179 | -0.001082 | 0.041407  | -0.000424 |
| O | -3.378295 | 8.185194  | 5.338611 | -0.001068 | 0.041300  | -0.000415 |
| H | -0.637445 | 12.195109 | 2.878812 | 0.018243  | 0.033674  | -0.017594 |
| H | 3.090587  | 1.606491  | 3.487978 | 0.018235  | 0.033571  | -0.017569 |
| H | 5.245016  | 5.294309  | 0.304583 | -0.018276 | 0.033647  | 0.017597  |
| H | -2.791874 | 8.507292  | 6.062207 | -0.018195 | 0.033521  | 0.017559  |

106 f = 13.446140 THz      84.484591 2PiTHz      448.514946 cm-1      55.608786 meV

|    | X         | Y         | Z        | dx        | dy        | dz        |
|----|-----------|-----------|----------|-----------|-----------|-----------|
| Li | 3.769818  | 9.645336  | 4.001386 | 0.011105  | 0.004467  | 0.003275  |
| Li | -1.316675 | 4.156264  | 2.365404 | -0.011173 | -0.004284 | -0.003096 |
| Li | -3.471104 | 2.744536  | 5.548798 | -0.011125 | 0.004383  | -0.003214 |
| Li | 5.924247  | 11.057064 | 0.817991 | 0.011143  | -0.004291 | 0.003096  |
| Na | 2.049025  | 6.784862  | 1.629696 | -0.002888 | 0.002529  | -0.001150 |
| Na | 0.404117  | 7.016739  | 4.737094 | 0.002889  | -0.002520 | 0.001093  |
| Na | 2.558546  | 13.685662 | 1.553699 | 0.002888  | 0.002527  | 0.001095  |
| Na | -0.105403 | 0.115939  | 4.813091 | -0.002890 | -0.002523 | -0.001148 |

|    |           |           |          |           |           |           |
|----|-----------|-----------|----------|-----------|-----------|-----------|
| B  | 4.155007  | 8.978944  | 1.168663 | 0.005182  | 0.010704  | 0.010531  |
| B  | -1.701865 | 4.822656  | 5.198127 | -0.005159 | -0.010717 | -0.010532 |
| B  | 0.452564  | 2.078144  | 2.014732 | -0.005172 | 0.010710  | -0.010527 |
| B  | 2.000578  | 11.723457 | 4.352058 | 0.005155  | -0.010711 | 0.010535  |
| B  | -2.733891 | 11.746082 | 5.839177 | -0.016755 | -0.015385 | -0.003005 |
| B  | 5.187034  | 2.055518  | 0.527613 | 0.016739  | 0.015385  | 0.003014  |
| B  | 3.032605  | 4.845282  | 3.711007 | 0.016745  | -0.015384 | 0.003003  |
| B  | -0.579463 | 8.956318  | 2.655782 | -0.016735 | 0.015386  | -0.003025 |
| B  | -0.983708 | 0.054306  | 1.827988 | -0.015475 | -0.043406 | 0.018849  |
| B  | 3.436850  | 13.747295 | 4.538802 | 0.015500  | 0.043447  | -0.018862 |
| B  | 5.591279  | 6.955106  | 1.355407 | 0.015460  | -0.043402 | -0.018829 |
| B  | -3.138137 | 6.846495  | 5.011383 | -0.015485 | 0.043433  | 0.018862  |
| Si | 0.631772  | 3.486686  | 4.508512 | 0.020797  | 0.000712  | -0.032416 |
| Si | 1.821370  | 10.314915 | 1.858278 | -0.020727 | -0.000720 | 0.032444  |
| Si | -0.333059 | 10.387486 | 5.041673 | -0.020802 | 0.000688  | 0.032406  |
| Si | 2.786201  | 3.414115  | 1.325117 | 0.020746  | -0.000727 | -0.032442 |
| O  | 0.061445  | 3.072947  | 3.041906 | -0.018673 | 0.007197  | -0.013553 |
| O  | 2.391697  | 10.728653 | 3.324884 | 0.018673  | -0.007218 | 0.013595  |
| O  | 4.546126  | 9.973747  | 0.141489 | 0.018663  | 0.007210  | 0.013555  |
| O  | -2.092984 | 3.827853  | 6.225301 | -0.018684 | -0.007205 | -0.013580 |
| O  | 2.197450  | 3.933608  | 4.519003 | 0.019993  | -0.009754 | 0.010967  |
| O  | 0.255692  | 9.867992  | 1.847787 | -0.019948 | 0.009769  | -0.010963 |
| O  | -1.898737 | 10.834409 | 5.031182 | -0.019995 | -0.009757 | -0.010969 |
| O  | 4.351879  | 2.967192  | 1.335608 | 0.019959  | 0.009749  | 0.010968  |
| O  | -0.212316 | 4.798696  | 5.055280 | 0.001690  | -0.022416 | 0.016037  |
| O  | 2.665458  | 9.002905  | 1.311510 | -0.001661 | 0.022422  | -0.016057 |
| O  | 0.511030  | 11.699496 | 4.494905 | -0.001701 | -0.022428 | -0.016053 |
| O  | 1.942113  | 2.102105  | 1.871885 | 0.001673  | 0.022409  | 0.016046  |
| O  | 0.525580  | 2.169271  | 5.472081 | -0.011909 | 0.027768  | 0.010918  |
| O  | 1.927562  | 11.632329 | 0.894709 | 0.011902  | -0.027774 | -0.010912 |
| O  | -0.226867 | 9.070071  | 4.078104 | 0.011912  | 0.027769  | -0.010935 |
| O  | 2.680009  | 4.731529  | 2.288686 | -0.011915 | -0.027768 | 0.010903  |
| O  | 0.058846  | 0.698526  | 2.444964 | -0.026583 | -0.002004 | -0.003339 |
| O  | 2.394296  | 13.103075 | 3.921826 | 0.026624  | 0.001998  | 0.003343  |
| O  | 4.548725  | 7.599326  | 0.738431 | 0.026575  | -0.002006 | 0.003342  |
| O  | -2.095583 | 6.202275  | 5.628359 | -0.026607 | 0.001997  | -0.003329 |



|   |           |           |          |           |           |           |
|---|-----------|-----------|----------|-----------|-----------|-----------|
| O | -2.459230 | 13.184059 | 5.445139 | -0.005189 | 0.002759  | -0.022307 |
| O | 4.912372  | 0.617542  | 0.921651 | 0.005204  | -0.002758 | 0.022281  |
| O | 2.757943  | 6.283259  | 4.105046 | 0.005199  | 0.002754  | 0.022308  |
| O | -0.304801 | 7.518342  | 2.261744 | -0.005213 | -0.002765 | -0.022259 |
| O | -0.175430 | 2.374756  | 0.744070 | 0.007585  | 0.048069  | -0.004321 |
| O | 2.628573  | 11.426844 | 5.622720 | -0.007579 | -0.048148 | 0.004300  |
| O | 4.783002  | 9.275557  | 2.439325 | -0.007581 | 0.048048  | 0.004325  |
| O | -2.329859 | 4.526044  | 3.927465 | 0.007576  | -0.048139 | -0.004303 |
| O | -1.223866 | 12.517207 | 2.155216 | -0.005931 | -0.060889 | 0.008565  |
| O | 3.677009  | 1.284394  | 4.211574 | 0.005924  | 0.060951  | -0.008563 |
| O | 5.831438  | 5.616407  | 1.028179 | 0.005924  | -0.060876 | -0.008560 |
| O | -3.378295 | 8.185194  | 5.338611 | -0.005928 | 0.060931  | 0.008555  |
| H | -0.637445 | 12.195109 | 2.878812 | -0.017220 | -0.060426 | 0.020252  |
| H | 3.090587  | 1.606491  | 3.487978 | 0.017254  | 0.060464  | -0.020293 |
| H | 5.245016  | 5.294309  | 0.304583 | 0.017231  | -0.060402 | -0.020264 |
| H | -2.791874 | 8.507292  | 6.062207 | -0.017248 | 0.060443  | 0.020278  |

107 f = 12.789200 THz 80.356912 2PiTHz 426.601773 cm-1 52.891898 meV

|    | X         | Y         | Z        | dx        | dy        | dz        |
|----|-----------|-----------|----------|-----------|-----------|-----------|
| Li | 3.769818  | 9.645336  | 4.001386 | 0.001474  | 0.002322  | -0.015545 |
| Li | -1.316675 | 4.156264  | 2.365404 | -0.000472 | 0.000347  | 0.017604  |
| Li | -3.471104 | 2.744536  | 5.548798 | 0.000445  | 0.000397  | -0.017618 |
| Li | 5.924247  | 11.057064 | 0.817991 | -0.001503 | 0.002341  | 0.015619  |
| Na | 2.049025  | 6.784862  | 1.629696 | 0.001705  | 0.008021  | -0.006442 |
| Na | 0.404117  | 7.016739  | 4.737094 | -0.002017 | -0.008067 | 0.006157  |
| Na | 2.558546  | 13.685662 | 1.553699 | 0.002017  | -0.008072 | -0.006152 |
| Na | -0.105403 | 0.115939  | 4.813091 | -0.001704 | 0.008017  | 0.006444  |
| B  | 4.155007  | 8.978944  | 1.168663 | 0.017390  | -0.028523 | 0.006519  |
| B  | -1.701865 | 4.822656  | 5.198127 | -0.018203 | 0.030747  | -0.006912 |
| B  | 0.452564  | 2.078144  | 2.014732 | 0.018215  | 0.030733  | 0.006916  |
| B  | 2.000578  | 11.723457 | 4.352058 | -0.017394 | -0.028529 | -0.006514 |
| B  | -2.733891 | 11.746082 | 5.839177 | -0.013638 | 0.025808  | -0.012419 |
| B  | 5.187034  | 2.055518  | 0.527613 | 0.014445  | -0.027648 | 0.013637  |
| B  | 3.032605  | 4.845282  | 3.711007 | -0.014450 | -0.027636 | -0.013628 |
| B  | -0.579463 | 8.956318  | 2.655782 | 0.013625  | 0.025822  | 0.012410  |

|    |           |           |          |           |           |           |
|----|-----------|-----------|----------|-----------|-----------|-----------|
| B  | -0.983708 | 0.054306  | 1.827988 | -0.014901 | -0.004021 | -0.011317 |
| B  | 3.436850  | 13.747295 | 4.538802 | 0.014222  | 0.002812  | 0.010847  |
| B  | 5.591279  | 6.955106  | 1.355407 | -0.014224 | 0.002826  | -0.010864 |
| B  | -3.138137 | 6.846495  | 5.011383 | 0.014908  | -0.004032 | 0.011307  |
| Si | 0.631772  | 3.486686  | 4.508512 | -0.016644 | -0.000717 | 0.033715  |
| Si | 1.821370  | 10.314915 | 1.858278 | 0.015718  | 0.000703  | -0.031592 |
| Si | -0.333059 | 10.387486 | 5.041673 | -0.015714 | 0.000697  | 0.031609  |
| Si | 2.786201  | 3.414115  | 1.325117 | 0.016627  | -0.000702 | -0.033700 |
| O  | 0.061445  | 3.072947  | 3.041906 | 0.022878  | 0.040376  | 0.003573  |
| O  | 2.391697  | 10.728653 | 3.324884 | -0.021125 | -0.036770 | -0.003764 |
| O  | 4.546126  | 9.973747  | 0.141489 | 0.021159  | -0.036787 | 0.003766  |
| O  | -2.092984 | 3.827853  | 6.225301 | -0.022856 | 0.040372  | -0.003578 |
| O  | 2.197450  | 3.933608  | 4.519003 | -0.004146 | -0.038740 | -0.011130 |
| O  | 0.255692  | 9.867992  | 1.847787 | 0.003920  | 0.036551  | 0.010429  |
| O  | -1.898737 | 10.834409 | 5.031182 | -0.003911 | 0.036577  | -0.010460 |
| O  | 4.351879  | 2.967192  | 1.335608 | 0.004133  | -0.038739 | 0.011127  |
| O  | -0.212316 | 4.798696  | 5.055280 | -0.018805 | 0.025071  | -0.032837 |
| O  | 2.665458  | 9.002905  | 1.311510 | 0.018072  | -0.023018 | 0.030457  |
| O  | 0.511030  | 11.699496 | 4.494905 | -0.018065 | -0.023026 | -0.030447 |
| O  | 1.942113  | 2.102105  | 1.871885 | 0.018820  | 0.025064  | 0.032848  |
| O  | 0.525580  | 2.169271  | 5.472081 | 0.029946  | -0.021117 | 0.009647  |
| O  | 1.927562  | 11.632329 | 0.894709 | -0.027901 | 0.019489  | -0.009173 |
| O  | -0.226867 | 9.070071  | 4.078104 | 0.027883  | 0.019503  | 0.009161  |
| O  | 2.680009  | 4.731529  | 2.288686 | -0.029951 | -0.021094 | -0.009646 |
| O  | 0.058846  | 0.698526  | 2.444964 | -0.008023 | 0.015409  | -0.042530 |
| O  | 2.394296  | 13.103075 | 3.921826 | 0.007899  | -0.015157 | 0.039680  |
| O  | 4.548725  | 7.599326  | 0.738431 | -0.007903 | -0.015152 | -0.039712 |
| O  | -2.095583 | 6.202275  | 5.628359 | 0.008021  | 0.015405  | 0.042533  |
| O  | -2.459230 | 13.184059 | 5.445139 | 0.041067  | 0.016696  | -0.004613 |
| O  | 4.912372  | 0.617542  | 0.921651 | -0.043398 | -0.018399 | 0.005376  |
| O  | 2.757943  | 6.283259  | 4.105046 | 0.043398  | -0.018405 | -0.005377 |
| O  | -0.304801 | 7.518342  | 2.261744 | -0.041072 | 0.016713  | 0.004595  |
| O  | -0.175430 | 2.374756  | 0.744070 | 0.011751  | 0.004353  | 0.002741  |
| O  | 2.628573  | 11.426844 | 5.622720 | -0.011359 | -0.003684 | -0.002389 |
| O  | 4.783002  | 9.275557  | 2.439325 | 0.011341  | -0.003680 | 0.002400  |
| O  | -2.329859 | 4.526044  | 3.927465 | -0.011747 | 0.004373  | -0.002738 |

|   |           |           |          |           |           |           |
|---|-----------|-----------|----------|-----------|-----------|-----------|
| O | -1.223866 | 12.517207 | 2.155216 | -0.006915 | -0.004965 | -0.008565 |
| O | 3.677009  | 1.284394  | 4.211574 | 0.005888  | 0.003425  | 0.008081  |
| O | 5.831438  | 5.616407  | 1.028179 | -0.005879 | 0.003434  | -0.008072 |
| O | -3.378295 | 8.185194  | 5.338611 | 0.006920  | -0.004977 | 0.008541  |
| H | -0.637445 | 12.195109 | 2.878812 | -0.004994 | -0.009327 | -0.010363 |
| H | 3.090587  | 1.606491  | 3.487978 | 0.003541  | 0.007891  | 0.010149  |
| H | 5.245016  | 5.294309  | 0.304583 | -0.003519 | 0.007895  | -0.010145 |
| H | -2.791874 | 8.507292  | 6.062207 | 0.004962  | -0.009336 | 0.010370  |

108 f = 12.784160 THz 80.325249 2PiTHz 426.433677 cm-1 52.871057 meV

|    | X         | Y         | Z        | dx        | dy        | dz        |
|----|-----------|-----------|----------|-----------|-----------|-----------|
| Li | 3.769818  | 9.645336  | 4.001386 | 0.013640  | 0.036611  | 0.028547  |
| Li | -1.316675 | 4.156264  | 2.365404 | 0.013701  | 0.036683  | 0.027381  |
| Li | -3.471104 | 2.744536  | 5.548798 | -0.013690 | 0.036675  | -0.027390 |
| Li | 5.924247  | 11.057064 | 0.817991 | -0.013648 | 0.036618  | -0.028594 |
| Na | 2.049025  | 6.784862  | 1.629696 | -0.004154 | -0.001039 | -0.002625 |
| Na | 0.404117  | 7.016739  | 4.737094 | -0.004028 | -0.000448 | -0.003045 |
| Na | 2.558546  | 13.685662 | 1.553699 | 0.004027  | -0.000449 | 0.003042  |
| Na | -0.105403 | 0.115939  | 4.813091 | 0.004153  | -0.001035 | 0.002625  |
| B  | 4.155007  | 8.978944  | 1.168663 | -0.011928 | 0.031246  | -0.005951 |
| B  | -1.701865 | 4.822656  | 5.198127 | -0.010617 | 0.029066  | -0.005436 |
| B  | 0.452564  | 2.078144  | 2.014732 | 0.010610  | 0.029066  | 0.005437  |
| B  | 2.000578  | 11.723457 | 4.352058 | 0.011940  | 0.031245  | 0.005949  |
| B  | -2.733891 | 11.746082 | 5.839177 | 0.011564  | -0.025888 | 0.017125  |
| B  | 5.187034  | 2.055518  | 0.527613 | 0.010543  | -0.023935 | 0.016166  |
| B  | 3.032605  | 4.845282  | 3.711007 | -0.010543 | -0.023935 | -0.016159 |
| B  | -0.579463 | 8.956318  | 2.655782 | -0.011558 | -0.025891 | -0.017119 |
| B  | -0.983708 | 0.054306  | 1.827988 | -0.008628 | -0.015615 | -0.005913 |
| B  | 3.436850  | 13.747295 | 4.538802 | -0.009706 | -0.015818 | -0.006740 |
| B  | 5.591279  | 6.955106  | 1.355407 | 0.009710  | -0.015840 | 0.006750  |
| B  | -3.138137 | 6.846495  | 5.011383 | 0.008627  | -0.015608 | 0.005915  |
| Si | 0.631772  | 3.486686  | 4.508512 | -0.011843 | -0.000251 | 0.027494  |
| Si | 1.821370  | 10.314915 | 1.858278 | -0.013022 | -0.000325 | 0.029897  |
| Si | -0.333059 | 10.387486 | 5.041673 | 0.013018  | -0.000313 | -0.029910 |
| Si | 2.786201  | 3.414115  | 1.325117 | 0.011835  | -0.000244 | -0.027482 |

|   |           |           |          |           |           |           |
|---|-----------|-----------|----------|-----------|-----------|-----------|
| O | 0.061445  | 3.072947  | 3.041906 | 0.022515  | 0.047443  | -0.002610 |
| O | 2.391697  | 10.728653 | 3.324884 | 0.024123  | 0.050257  | -0.002335 |
| O | 4.546126  | 9.973747  | 0.141489 | -0.024145 | 0.050270  | 0.002330  |
| O | -2.092984 | 3.827853  | 6.225301 | -0.022508 | 0.047434  | 0.002609  |
| O | 2.197450  | 3.933608  | 4.519003 | -0.002863 | -0.028625 | -0.009320 |
| O | 0.255692  | 9.867992  | 1.847787 | -0.003149 | -0.031397 | -0.010090 |
| O | -1.898737 | 10.834409 | 5.031182 | 0.003142  | -0.031414 | 0.010112  |
| O | 4.351879  | 2.967192  | 1.335608 | 0.002858  | -0.028618 | 0.009317  |
| O | -0.212316 | 4.798696  | 5.055280 | -0.009620 | 0.026766  | -0.031628 |
| O | 2.665458  | 9.002905  | 1.311510 | -0.010992 | 0.028504  | -0.033995 |
| O | 0.511030  | 11.699496 | 4.494905 | 0.010997  | 0.028510  | 0.033998  |
| O | 1.942113  | 2.102105  | 1.871885 | 0.009615  | 0.026766  | 0.031623  |
| O | 0.525580  | 2.169271  | 5.472081 | 0.027019  | -0.021274 | 0.006277  |
| O | 1.927562  | 11.632329 | 0.894709 | 0.029102  | -0.022773 | 0.006984  |
| O | -0.226867 | 9.070071  | 4.078104 | -0.029098 | -0.022773 | -0.006978 |
| O | 2.680009  | 4.731529  | 2.288686 | -0.027013 | -0.021265 | -0.006273 |
| O | 0.058846  | 0.698526  | 2.444964 | -0.001164 | 0.003166  | -0.037044 |
| O | 2.394296  | 13.103075 | 3.921826 | -0.001749 | 0.004307  | -0.040049 |
| O | 4.548725  | 7.599326  | 0.738431 | 0.001758  | 0.004302  | 0.040071  |
| O | -2.095583 | 6.202275  | 5.628359 | 0.001162  | 0.003169  | 0.037042  |
| O | -2.459230 | 13.184059 | 5.445139 | -0.033495 | -0.023556 | 0.010520  |
| O | 4.912372  | 0.617542  | 0.921651 | -0.030384 | -0.022300 | 0.010163  |
| O | 2.757943  | 6.283259  | 4.105046 | 0.030388  | -0.022295 | -0.010165 |
| O | -0.304801 | 7.518342  | 2.261744 | 0.033502  | -0.023574 | -0.010512 |
| O | -0.175430 | 2.374756  | 0.744070 | 0.005071  | 0.008536  | 0.004770  |
| O | 2.628573  | 11.426844 | 5.622720 | 0.005932  | 0.008828  | 0.004968  |
| O | 4.783002  | 9.275557  | 2.439325 | -0.005917 | 0.008836  | -0.004975 |
| O | -2.329859 | 4.526044  | 3.927465 | -0.005071 | 0.008540  | -0.004771 |
| O | -1.223866 | 12.517207 | 2.155216 | -0.013689 | -0.019966 | -0.006282 |
| O | 3.677009  | 1.284394  | 4.211574 | -0.014163 | -0.020218 | -0.006924 |
| O | 5.831438  | 5.616407  | 1.028179 | 0.014146  | -0.020239 | 0.006905  |
| O | -3.378295 | 8.185194  | 5.338611 | 0.013685  | -0.019962 | 0.006289  |
| H | -0.637445 | 12.195109 | 2.878812 | -0.019141 | -0.018579 | -0.003022 |
| H | 3.090587  | 1.606491  | 3.487978 | -0.019476 | -0.019175 | -0.003802 |
| H | 5.245016  | 5.294309  | 0.304583 | 0.019428  | -0.019176 | 0.003798  |
| H | -2.791874 | 8.507292  | 6.062207 | 0.019150  | -0.018569 | 0.003015  |

109 f = 12.563899 THz 78.941304 2PiTHz 419.086538 cm-1 51.960127  
meV

|    | X         | Y         | Z        | dx        | dy        | dz        |
|----|-----------|-----------|----------|-----------|-----------|-----------|
| Li | 3.769818  | 9.645336  | 4.001386 | 0.015759  | -0.065778 | -0.060629 |
| Li | -1.316675 | 4.156264  | 2.365404 | 0.015566  | -0.065792 | -0.060386 |
| Li | -3.471104 | 2.744536  | 5.548798 | -0.015663 | -0.065710 | 0.060468  |
| Li | 5.924247  | 11.057064 | 0.817991 | -0.015671 | -0.065844 | 0.060506  |
| Na | 2.049025  | 6.784862  | 1.629696 | -0.001150 | 0.004955  | -0.001145 |
| Na | 0.404117  | 7.016739  | 4.737094 | -0.001148 | 0.004925  | -0.001110 |
| Na | 2.558546  | 13.685662 | 1.553699 | 0.001151  | 0.004944  | 0.001112  |
| Na | -0.105403 | 0.115939  | 4.813091 | 0.001147  | 0.004938  | 0.001143  |
| B  | 4.155007  | 8.978944  | 1.168663 | -0.020443 | 0.002731  | -0.007593 |
| B  | -1.701865 | 4.822656  | 5.198127 | -0.020435 | 0.002742  | -0.007619 |
| B  | 0.452564  | 2.078144  | 2.014732 | 0.020436  | 0.002752  | 0.007612  |
| B  | 2.000578  | 11.723457 | 4.352058 | 0.020443  | 0.002716  | 0.007598  |
| B  | -2.733891 | 11.746082 | 5.839177 | -0.000851 | -0.017131 | -0.007061 |
| B  | 5.187034  | 2.055518  | 0.527613 | -0.000830 | -0.017124 | -0.007056 |
| B  | 3.032605  | 4.845282  | 3.711007 | 0.000841  | -0.017130 | 0.007050  |
| B  | -0.579463 | 8.956318  | 2.655782 | 0.000840  | -0.017127 | 0.007074  |
| B  | -0.983708 | 0.054306  | 1.827988 | -0.001412 | 0.048918  | -0.010246 |
| B  | 3.436850  | 13.747295 | 4.538802 | -0.001409 | 0.048926  | -0.010234 |
| B  | 5.591279  | 6.955106  | 1.355407 | 0.001428  | 0.048948  | 0.010228  |
| B  | -3.138137 | 6.846495  | 5.011383 | 0.001397  | 0.048888  | 0.010251  |
| Si | 0.631772  | 3.486686  | 4.508512 | -0.017598 | -0.002660 | 0.004522  |
| Si | 1.821370  | 10.314915 | 1.858278 | -0.017671 | -0.002649 | 0.004495  |
| Si | -0.333059 | 10.387486 | 5.041673 | 0.017626  | -0.002641 | -0.004468 |
| Si | 2.786201  | 3.414115  | 1.325117 | 0.017630  | -0.002664 | -0.004550 |
| O  | 0.061445  | 3.072947  | 3.041906 | -0.003757 | -0.009681 | 0.002368  |
| O  | 2.391697  | 10.728653 | 3.324884 | -0.003770 | -0.009685 | 0.002331  |
| O  | 4.546126  | 9.973747  | 0.141489 | 0.003808  | -0.009722 | -0.002354 |
| O  | -2.092984 | 3.827853  | 6.225301 | 0.003718  | -0.009643 | -0.002348 |
| O  | 2.197450  | 3.933608  | 4.519003 | -0.000034 | -0.045787 | -0.016786 |
| O  | 0.255692  | 9.867992  | 1.847787 | -0.000087 | -0.045791 | -0.016845 |
| O  | -1.898737 | 10.834409 | 5.031182 | 0.000052  | -0.045791 | 0.016825  |
| O  | 4.351879  | 2.967192  | 1.335608 | 0.000061  | -0.045794 | 0.016815  |

|   |           |           |          |           |           |           |
|---|-----------|-----------|----------|-----------|-----------|-----------|
| O | -0.212316 | 4.798696  | 5.055280 | -0.014708 | 0.000443  | -0.000574 |
| O | 2.665458  | 9.002905  | 1.311510 | -0.014702 | 0.000471  | -0.000506 |
| O | 0.511030  | 11.699496 | 4.494905 | 0.014699  | 0.000438  | 0.000505  |
| O | 1.942113  | 2.102105  | 1.871885 | 0.014708  | 0.000472  | 0.000568  |
| O | 0.525580  | 2.169271  | 5.472081 | 0.013688  | -0.014648 | -0.006804 |
| O | 1.927562  | 11.632329 | 0.894709 | 0.013741  | -0.014662 | -0.006840 |
| O | -0.226867 | 9.070071  | 4.078104 | -0.013720 | -0.014617 | 0.006828  |
| O | 2.680009  | 4.731529  | 2.288686 | -0.013700 | -0.014693 | 0.006821  |
| O | 0.058846  | 0.698526  | 2.444964 | 0.009967  | 0.019442  | -0.001753 |
| O | 2.394296  | 13.103075 | 3.921826 | 0.009980  | 0.019423  | -0.001721 |
| O | 4.548725  | 7.599326  | 0.738431 | -0.009961 | 0.019459  | 0.001739  |
| O | -2.095583 | 6.202275  | 5.628359 | -0.009983 | 0.019406  | 0.001748  |
| O | -2.459230 | 13.184059 | 5.445139 | -0.027167 | 0.019394  | 0.001045  |
| O | 4.912372  | 0.617542  | 0.921651 | -0.027170 | 0.019396  | 0.001040  |
| O | 2.757943  | 6.283259  | 4.105046 | 0.027163  | 0.019377  | -0.001050 |
| O | -0.304801 | 7.518342  | 2.261744 | 0.027178  | 0.019407  | -0.001030 |
| O | -0.175430 | 2.374756  | 0.744070 | 0.003707  | -0.025061 | 0.005230  |
| O | 2.628573  | 11.426844 | 5.622720 | 0.003675  | -0.025077 | 0.005248  |
| O | 4.783002  | 9.275557  | 2.439325 | -0.003680 | -0.025080 | -0.005241 |
| O | -2.329859 | 4.526044  | 3.927465 | -0.003698 | -0.025056 | -0.005236 |
| O | -1.223866 | 12.517207 | 2.155216 | 0.003308  | 0.055213  | -0.019853 |
| O | 3.677009  | 1.284394  | 4.211574 | 0.003295  | 0.055218  | -0.019875 |
| O | 5.831438  | 5.616407  | 1.028179 | -0.003309 | 0.055250  | 0.019827  |
| O | -3.378295 | 8.185194  | 5.338611 | -0.003293 | 0.055173  | 0.019884  |
| H | -0.637445 | 12.195109 | 2.878812 | -0.001601 | 0.062880  | -0.014069 |
| H | 3.090587  | 1.606491  | 3.487978 | -0.001600 | 0.062894  | -0.014100 |
| H | 5.245016  | 5.294309  | 0.304583 | 0.001559  | 0.062935  | 0.014070  |
| H | -2.791874 | 8.507292  | 6.062207 | 0.001660  | 0.062833  | 0.014067  |

110 f = 12.436356 THz      78.139929 2PiTHz      414.832170 cm-1      51.432652 meV

|    | X         | Y         | Z        | dx        | dy        | dz        |
|----|-----------|-----------|----------|-----------|-----------|-----------|
| Li | 3.769818  | 9.645336  | 4.001386 | 0.068139  | 0.077606  | -0.065037 |
| Li | -1.316675 | 4.156264  | 2.365404 | -0.068160 | -0.077505 | 0.065130  |
| Li | -3.471104 | 2.744536  | 5.548798 | -0.068108 | 0.077627  | 0.065045  |
| Li | 5.924247  | 11.057064 | 0.817991 | 0.068114  | -0.077519 | -0.065060 |

|    |           |           |          |           |           |           |
|----|-----------|-----------|----------|-----------|-----------|-----------|
| Na | 2.049025  | 6.784862  | 1.629696 | -0.000634 | 0.002453  | -0.000887 |
| Na | 0.404117  | 7.016739  | 4.737094 | 0.000637  | -0.002465 | 0.000889  |
| Na | 2.558546  | 13.685662 | 1.553699 | 0.000636  | 0.002459  | 0.000887  |
| Na | -0.105403 | 0.115939  | 4.813091 | -0.000637 | -0.002463 | -0.000890 |
| B  | 4.155007  | 8.978944  | 1.168663 | -0.007109 | 0.004314  | 0.004384  |
| B  | -1.701865 | 4.822656  | 5.198127 | 0.007135  | -0.004312 | -0.004374 |
| B  | 0.452564  | 2.078144  | 2.014732 | 0.007103  | 0.004312  | -0.004381 |
| B  | 2.000578  | 11.723457 | 4.352058 | -0.007130 | -0.004314 | 0.004378  |
| B  | -2.733891 | 11.746082 | 5.839177 | -0.003667 | 0.002644  | 0.007912  |
| B  | 5.187034  | 2.055518  | 0.527613 | 0.003665  | -0.002628 | -0.007898 |
| B  | 3.032605  | 4.845282  | 3.711007 | 0.003660  | 0.002650  | -0.007915 |
| B  | -0.579463 | 8.956318  | 2.655782 | -0.003665 | -0.002633 | 0.007904  |
| B  | -0.983708 | 0.054306  | 1.827988 | -0.009236 | 0.028159  | 0.002800  |
| B  | 3.436850  | 13.747295 | 4.538802 | 0.009250  | -0.028242 | -0.002791 |
| B  | 5.591279  | 6.955106  | 1.355407 | 0.009251  | 0.028190  | -0.002808 |
| B  | -3.138137 | 6.846495  | 5.011383 | -0.009244 | -0.028251 | 0.002787  |
| Si | 0.631772  | 3.486686  | 4.508512 | 0.023200  | -0.001097 | -0.015676 |
| Si | 1.821370  | 10.314915 | 1.858278 | -0.023193 | 0.001103  | 0.015685  |
| Si | -0.333059 | 10.387486 | 5.041673 | -0.023195 | -0.001094 | 0.015687  |
| Si | 2.786201  | 3.414115  | 1.325117 | 0.023168  | 0.001113  | -0.015672 |
| O  | 0.061445  | 3.072947  | 3.041906 | -0.023607 | -0.031717 | 0.015376  |
| O  | 2.391697  | 10.728653 | 3.324884 | 0.023622  | 0.031765  | -0.015395 |
| O  | 4.546126  | 9.973747  | 0.141489 | 0.023629  | -0.031750 | -0.015391 |
| O  | -2.092984 | 3.827853  | 6.225301 | -0.023611 | 0.031760  | 0.015387  |
| O  | 2.197450  | 3.933608  | 4.519003 | 0.015941  | 0.008794  | 0.015832  |
| O  | 0.255692  | 9.867992  | 1.847787 | -0.015939 | -0.008766 | -0.015827 |
| O  | -1.898737 | 10.834409 | 5.031182 | -0.015932 | 0.008810  | -0.015843 |
| O  | 4.351879  | 2.967192  | 1.335608 | 0.015932  | -0.008735 | 0.015813  |
| O  | -0.212316 | 4.798696  | 5.055280 | 0.004616  | -0.021476 | 0.001846  |
| O  | 2.665458  | 9.002905  | 1.311510 | -0.004591 | 0.021498  | -0.001840 |
| O  | 0.511030  | 11.699496 | 4.494905 | -0.004611 | -0.021488 | -0.001857 |
| O  | 1.942113  | 2.102105  | 1.871885 | 0.004588  | 0.021484  | 0.001836  |
| O  | 0.525580  | 2.169271  | 5.472081 | -0.014163 | 0.021867  | 0.007815  |
| O  | 1.927562  | 11.632329 | 0.894709 | 0.014151  | -0.021865 | -0.007811 |
| O  | -0.226867 | 9.070071  | 4.078104 | 0.014159  | 0.021877  | -0.007814 |
| O  | 2.680009  | 4.731529  | 2.288686 | -0.014163 | -0.021839 | 0.007804  |

|   |           |           |          |           |           |           |
|---|-----------|-----------|----------|-----------|-----------|-----------|
| O | 0.058846  | 0.698526  | 2.444964 | -0.007682 | 0.026300  | 0.002114  |
| O | 2.394296  | 13.103075 | 3.921826 | 0.007683  | -0.026350 | -0.002112 |
| O | 4.548725  | 7.599326  | 0.738431 | 0.007691  | 0.026324  | -0.002117 |
| O | -2.095583 | 6.202275  | 5.628359 | -0.007677 | -0.026348 | 0.002117  |
| O | -2.459230 | 13.184059 | 5.445139 | 0.012243  | -0.010126 | 0.009774  |
| O | 4.912372  | 0.617542  | 0.921651 | -0.012192 | 0.010093  | -0.009772 |
| O | 2.757943  | 6.283259  | 4.105046 | -0.012233 | -0.010128 | -0.009785 |
| O | -0.304801 | 7.518342  | 2.261744 | 0.012214  | 0.010106  | 0.009770  |
| O | -0.175430 | 2.374756  | 0.744070 | 0.006829  | -0.020395 | -0.009819 |
| O | 2.628573  | 11.426844 | 5.622720 | -0.006840 | 0.020430  | 0.009821  |
| O | 4.783002  | 9.275557  | 2.439325 | -0.006830 | -0.020404 | 0.009822  |
| O | -2.329859 | 4.526044  | 3.927465 | 0.006831  | 0.020431  | -0.009816 |
| O | -1.223866 | 12.517207 | 2.155216 | 0.009331  | 0.034817  | 0.016444  |
| O | 3.677009  | 1.284394  | 4.211574 | -0.009343 | -0.034913 | -0.016435 |
| O | 5.831438  | 5.616407  | 1.028179 | -0.009331 | 0.034851  | -0.016446 |
| O | -3.378295 | 8.185194  | 5.338611 | 0.009341  | -0.034924 | 0.016428  |
| H | -0.637445 | 12.195109 | 2.878812 | 0.029759  | 0.038574  | 0.000245  |
| H | 3.090587  | 1.606491  | 3.487978 | -0.029803 | -0.038674 | -0.000208 |
| H | 5.245016  | 5.294309  | 0.304583 | -0.029789 | 0.038592  | -0.000215 |
| H | -2.791874 | 8.507292  | 6.062207 | 0.029778  | -0.038682 | 0.000219  |

111 f = 12.338532 THz      77.525286 2PiTHz      411.569130 cm-1      51.028087 meV

|    | X         | Y         | Z        | dx        | dy        | dz        |
|----|-----------|-----------|----------|-----------|-----------|-----------|
| Li | 3.769818  | 9.645336  | 4.001386 | -0.087038 | 0.031821  | 0.084367  |
| Li | -1.316675 | 4.156264  | 2.365404 | 0.086993  | -0.032065 | -0.084372 |
| Li | -3.471104 | 2.744536  | 5.548798 | -0.087077 | -0.031872 | 0.084436  |
| Li | 5.924247  | 11.057064 | 0.817991 | 0.086994  | 0.031933  | -0.084309 |
| Na | 2.049025  | 6.784862  | 1.629696 | -0.002220 | 0.002481  | -0.001578 |
| Na | 0.404117  | 7.016739  | 4.737094 | 0.002218  | -0.002492 | 0.001563  |
| Na | 2.558546  | 13.685662 | 1.553699 | -0.002213 | -0.002450 | -0.001550 |
| Na | -0.105403 | 0.115939  | 4.813091 | 0.002225  | 0.002522  | 0.001588  |
| B  | 4.155007  | 8.978944  | 1.168663 | 0.012206  | 0.003004  | 0.001065  |
| B  | -1.701865 | 4.822656  | 5.198127 | -0.012207 | -0.002968 | -0.001055 |
| B  | 0.452564  | 2.078144  | 2.014732 | 0.012234  | -0.002993 | 0.001070  |
| B  | 2.000578  | 11.723457 | 4.352058 | -0.012191 | 0.002980  | -0.001043 |



|    |           |           |          |           |           |           |
|----|-----------|-----------|----------|-----------|-----------|-----------|
| B  | -2.733891 | 11.746082 | 5.839177 | 0.012036  | 0.013419  | 0.010646  |
| B  | 5.187034  | 2.055518  | 0.527613 | -0.012064 | -0.013477 | -0.010654 |
| B  | 3.032605  | 4.845282  | 3.711007 | 0.012038  | -0.013448 | 0.010648  |
| B  | -0.579463 | 8.956318  | 2.655782 | -0.012063 | 0.013443  | -0.010646 |
| B  | -0.983708 | 0.054306  | 1.827988 | -0.003795 | 0.039507  | 0.002143  |
| B  | 3.436850  | 13.747295 | 4.538802 | 0.003797  | -0.039465 | -0.002198 |
| B  | 5.591279  | 6.955106  | 1.355407 | -0.003794 | -0.039422 | 0.002159  |
| B  | -3.138137 | 6.846495  | 5.011383 | 0.003804  | 0.039508  | -0.002177 |
| Si | 0.631772  | 3.486686  | 4.508512 | -0.024798 | 0.000639  | -0.013374 |
| Si | 1.821370  | 10.314915 | 1.858278 | 0.024762  | -0.000694 | 0.013431  |
| Si | -0.333059 | 10.387486 | 5.041673 | -0.024789 | -0.000685 | -0.013383 |
| Si | 2.786201  | 3.414115  | 1.325117 | 0.024782  | 0.000652  | 0.013404  |
| O  | 0.061445  | 3.072947  | 3.041906 | -0.013743 | -0.018708 | -0.003179 |
| O  | 2.391697  | 10.728653 | 3.324884 | 0.013866  | 0.018744  | 0.003156  |
| O  | 4.546126  | 9.973747  | 0.141489 | -0.013755 | 0.018677  | -0.003184 |
| O  | -2.092984 | 3.827853  | 6.225301 | 0.013824  | -0.018734 | 0.003165  |
| O  | 2.197450  | 3.933608  | 4.519003 | -0.011855 | -0.020893 | -0.010859 |
| O  | 0.255692  | 9.867992  | 1.847787 | 0.011852  | 0.020774  | 0.010802  |
| O  | -1.898737 | 10.834409 | 5.031182 | -0.011863 | 0.020839  | -0.010883 |
| O  | 4.351879  | 2.967192  | 1.335608 | 0.011847  | -0.020855 | 0.010801  |
| O  | -0.212316 | 4.798696  | 5.055280 | -0.008361 | 0.001354  | 0.003251  |
| O  | 2.665458  | 9.002905  | 1.311510 | 0.008376  | -0.001334 | -0.003270 |
| O  | 0.511030  | 11.699496 | 4.494905 | -0.008336 | -0.001367 | 0.003322  |
| O  | 1.942113  | 2.102105  | 1.871885 | 0.008402  | 0.001340  | -0.003201 |
| O  | 0.525580  | 2.169271  | 5.472081 | 0.012102  | -0.008311 | -0.016316 |
| O  | 1.927562  | 11.632329 | 0.894709 | -0.012177 | 0.008215  | 0.016303  |
| O  | -0.226867 | 9.070071  | 4.078104 | 0.012141  | 0.008264  | -0.016317 |
| O  | 2.680009  | 4.731529  | 2.288686 | -0.012149 | -0.008280 | 0.016307  |
| O  | 0.058846  | 0.698526  | 2.444964 | 0.006863  | 0.020782  | 0.001790  |
| O  | 2.394296  | 13.103075 | 3.921826 | -0.006847 | -0.020767 | -0.001843 |
| O  | 4.548725  | 7.599326  | 0.738431 | 0.006851  | -0.020731 | 0.001806  |
| O  | -2.095583 | 6.202275  | 5.628359 | -0.006854 | 0.020794  | -0.001802 |
| O  | -2.459230 | 13.184059 | 5.445139 | 0.017074  | -0.007027 | 0.008405  |
| O  | 4.912372  | 0.617542  | 0.921651 | -0.017122 | 0.007041  | -0.008429 |
| O  | 2.757943  | 6.283259  | 4.105046 | 0.017114  | 0.007057  | 0.008394  |
| O  | -0.304801 | 7.518342  | 2.261744 | -0.017079 | -0.006992 | -0.008441 |

|   |           |           |          |           |           |           |
|---|-----------|-----------|----------|-----------|-----------|-----------|
| O | -0.175430 | 2.374756  | 0.744070 | -0.013299 | -0.013901 | 0.011147  |
| O | 2.628573  | 11.426844 | 5.622720 | 0.013284  | 0.013906  | -0.011114 |
| O | 4.783002  | 9.275557  | 2.439325 | -0.013309 | 0.013901  | 0.011150  |
| O | -2.329859 | 4.526044  | 3.927465 | 0.013286  | -0.013880 | -0.011127 |
| O | -1.223866 | 12.517207 | 2.155216 | 0.010859  | 0.048832  | 0.002946  |
| O | 3.677009  | 1.284394  | 4.211574 | -0.010858 | -0.048755 | -0.002992 |
| O | 5.831438  | 5.616407  | 1.028179 | 0.010857  | -0.048724 | 0.002983  |
| O | -3.378295 | 8.185194  | 5.338611 | -0.010851 | 0.048816  | -0.002965 |
| H | -0.637445 | 12.195109 | 2.878812 | 0.026985  | 0.038994  | -0.015995 |
| H | 3.090587  | 1.606491  | 3.487978 | -0.027016 | -0.038902 | 0.015978  |
| H | 5.245016  | 5.294309  | 0.304583 | 0.026985  | -0.038883 | -0.015954 |
| H | -2.791874 | 8.507292  | 6.062207 | -0.027004 | 0.038963  | 0.016005  |

112 f = 12.168188 THz 76.454982 2PiTHz 405.887060 cm-1 50.323600  
meV

|    | X         | Y         | Z        | dx        | dy        | dz        |
|----|-----------|-----------|----------|-----------|-----------|-----------|
| Li | 3.769818  | 9.645336  | 4.001386 | -0.022703 | -0.056034 | 0.030212  |
| Li | -1.316675 | 4.156264  | 2.365404 | -0.022778 | -0.055951 | 0.030194  |
| Li | -3.471104 | 2.744536  | 5.548798 | -0.022635 | 0.055990  | 0.030051  |
| Li | 5.924247  | 11.057064 | 0.817991 | -0.022866 | 0.056038  | 0.030391  |
| Na | 2.049025  | 6.784862  | 1.629696 | 0.002568  | -0.017286 | 0.004716  |
| Na | 0.404117  | 7.016739  | 4.737094 | 0.002575  | -0.017233 | 0.004654  |
| Na | 2.558546  | 13.685662 | 1.553699 | 0.002583  | 0.017299  | 0.004667  |
| Na | -0.105403 | 0.115939  | 4.813091 | 0.002563  | 0.017239  | 0.004706  |
| B  | 4.155007  | 8.978944  | 1.168663 | 0.006604  | 0.006883  | 0.008193  |
| B  | -1.701865 | 4.822656  | 5.198127 | 0.006627  | 0.006873  | 0.008185  |
| B  | 0.452564  | 2.078144  | 2.014732 | 0.006603  | -0.006879 | 0.008182  |
| B  | 2.000578  | 11.723457 | 4.352058 | 0.006627  | -0.006862 | 0.008213  |
| B  | -2.733891 | 11.746082 | 5.839177 | -0.013411 | -0.009975 | -0.002755 |
| B  | 5.187034  | 2.055518  | 0.527613 | -0.013374 | -0.009910 | -0.002719 |
| B  | 3.032605  | 4.845282  | 3.711007 | -0.013396 | 0.009950  | -0.002737 |
| B  | -0.579463 | 8.956318  | 2.655782 | -0.013386 | 0.009923  | -0.002738 |
| B  | -0.983708 | 0.054306  | 1.827988 | 0.005527  | -0.020608 | -0.015086 |
| B  | 3.436850  | 13.747295 | 4.538802 | 0.005522  | -0.020562 | -0.015110 |
| B  | 5.591279  | 6.955106  | 1.355407 | 0.005532  | 0.020635  | -0.015106 |
| B  | -3.138137 | 6.846495  | 5.011383 | 0.005507  | 0.020546  | -0.015091 |

|    |           |           |          |           |           |           |
|----|-----------|-----------|----------|-----------|-----------|-----------|
| Si | 0.631772  | 3.486686  | 4.508512 | -0.013302 | -0.004783 | 0.025122  |
| Si | 1.821370  | 10.314915 | 1.858278 | -0.013355 | -0.004764 | 0.025163  |
| Si | -0.333059 | 10.387486 | 5.041673 | -0.013287 | 0.004754  | 0.025143  |
| Si | 2.786201  | 3.414115  | 1.325117 | -0.013353 | 0.004762  | 0.025120  |
| O  | 0.061445  | 3.072947  | 3.041906 | 0.051379  | 0.030965  | -0.011002 |
| O  | 2.391697  | 10.728653 | 3.324884 | 0.051378  | 0.030987  | -0.010985 |
| O  | 4.546126  | 9.973747  | 0.141489 | 0.051411  | -0.030993 | -0.010998 |
| O  | -2.092984 | 3.827853  | 6.225301 | 0.051343  | -0.030953 | -0.010992 |
| O  | 2.197450  | 3.933608  | 4.519003 | -0.003805 | -0.035816 | -0.043418 |
| O  | 0.255692  | 9.867992  | 1.847787 | -0.003801 | -0.035952 | -0.043493 |
| O  | -1.898737 | 10.834409 | 5.031182 | -0.003766 | 0.035899  | -0.043503 |
| O  | 4.351879  | 2.967192  | 1.335608 | -0.003833 | 0.035861  | -0.043446 |
| O  | -0.212316 | 4.798696  | 5.055280 | 0.016163  | 0.015969  | 0.020389  |
| O  | 2.665458  | 9.002905  | 1.311510 | 0.016155  | 0.016008  | 0.020407  |
| O  | 0.511030  | 11.699496 | 4.494905 | 0.016181  | -0.015992 | 0.020418  |
| O  | 1.942113  | 2.102105  | 1.871885 | 0.016150  | -0.015989 | 0.020419  |
| O  | 0.525580  | 2.169271  | 5.472081 | -0.023133 | -0.024795 | -0.006600 |
| O  | 1.927562  | 11.632329 | 0.894709 | -0.023177 | -0.024855 | -0.006641 |
| O  | -0.226867 | 9.070071  | 4.078104 | -0.023160 | 0.024804  | -0.006618 |
| O  | 2.680009  | 4.731529  | 2.288686 | -0.023091 | 0.024810  | -0.006628 |
| O  | 0.058846  | 0.698526  | 2.444964 | 0.003128  | -0.014372 | -0.013779 |
| O  | 2.394296  | 13.103075 | 3.921826 | 0.003150  | -0.014332 | -0.013822 |
| O  | 4.548725  | 7.599326  | 0.738431 | 0.003127  | 0.014371  | -0.013805 |
| O  | -2.095583 | 6.202275  | 5.628359 | 0.003142  | 0.014337  | -0.013799 |
| O  | -2.459230 | 13.184059 | 5.445139 | 0.003523  | -0.019301 | -0.016361 |
| O  | 4.912372  | 0.617542  | 0.921651 | 0.003547  | -0.019251 | -0.016265 |
| O  | 2.757943  | 6.283259  | 4.105046 | 0.003488  | 0.019270  | -0.016302 |
| O  | -0.304801 | 7.518342  | 2.261744 | 0.003574  | 0.019291  | -0.016333 |
| O  | -0.175430 | 2.374756  | 0.744070 | -0.013334 | 0.002623  | 0.015269  |
| O  | 2.628573  | 11.426844 | 5.622720 | -0.013389 | 0.002593  | 0.015326  |
| O  | 4.783002  | 9.275557  | 2.439325 | -0.013357 | -0.002597 | 0.015287  |
| O  | -2.329859 | 4.526044  | 3.927465 | -0.013358 | -0.002587 | 0.015293  |
| O  | -1.223866 | 12.517207 | 2.155216 | -0.001384 | -0.017674 | -0.003654 |
| O  | 3.677009  | 1.284394  | 4.211574 | -0.001379 | -0.017582 | -0.003566 |
| O  | 5.831438  | 5.616407  | 1.028179 | -0.001372 | 0.017677  | -0.003567 |
| O  | -3.378295 | 8.185194  | 5.338611 | -0.001370 | 0.017588  | -0.003618 |

|   |           |           |          |           |           |          |
|---|-----------|-----------|----------|-----------|-----------|----------|
| H | -0.637445 | 12.195109 | 2.878812 | -0.029163 | -0.010712 | 0.022766 |
| H | 3.090587  | 1.606491  | 3.487978 | -0.029011 | -0.010634 | 0.022728 |
| H | 5.245016  | 5.294309  | 0.304583 | -0.029018 | 0.010702  | 0.022753 |
| H | -2.791874 | 8.507292  | 6.062207 | -0.029072 | 0.010633  | 0.022736 |

113 f = 12.044616 THz 75.678557 2PiTHz 401.765144 cm-1 49.812547 meV

|    | X         | Y         | Z        | dx        | dy        | dz        |
|----|-----------|-----------|----------|-----------|-----------|-----------|
| Li | 3.769818  | 9.645336  | 4.001386 | 0.046630  | -0.003025 | -0.085929 |
| Li | -1.316675 | 4.156264  | 2.365404 | -0.046691 | 0.002928  | 0.085981  |
| Li | -3.471104 | 2.744536  | 5.548798 | -0.046758 | -0.002894 | 0.086026  |
| Li | 5.924247  | 11.057064 | 0.817991 | 0.046645  | 0.003028  | -0.085901 |
| Na | 2.049025  | 6.784862  | 1.629696 | 0.001578  | -0.001367 | 0.002626  |
| Na | 0.404117  | 7.016739  | 4.737094 | -0.001567 | 0.001339  | -0.002562 |
| Na | 2.558546  | 13.685662 | 1.553699 | -0.001568 | -0.001335 | -0.002563 |
| Na | -0.105403 | 0.115939  | 4.813091 | 0.001581  | 0.001386  | 0.002631  |
| B  | 4.155007  | 8.978944  | 1.168663 | 0.003186  | 0.000367  | -0.009724 |
| B  | -1.701865 | 4.822656  | 5.198127 | -0.003157 | -0.000353 | 0.009733  |
| B  | 0.452564  | 2.078144  | 2.014732 | -0.003163 | 0.000358  | 0.009746  |
| B  | 2.000578  | 11.723457 | 4.352058 | 0.003165  | -0.000391 | -0.009724 |
| B  | -2.733891 | 11.746082 | 5.839177 | 0.012017  | 0.001925  | 0.001871  |
| B  | 5.187034  | 2.055518  | 0.527613 | -0.012060 | -0.001937 | -0.001882 |
| B  | 3.032605  | 4.845282  | 3.711007 | -0.012053 | 0.001932  | -0.001880 |
| B  | -0.579463 | 8.956318  | 2.655782 | 0.012030  | -0.001907 | 0.001874  |
| B  | -0.983708 | 0.054306  | 1.827988 | -0.001698 | -0.021142 | -0.013538 |
| B  | 3.436850  | 13.747295 | 4.538802 | 0.001708  | 0.021119  | 0.013503  |
| B  | 5.591279  | 6.955106  | 1.355407 | 0.001693  | -0.021126 | 0.013496  |
| B  | -3.138137 | 6.846495  | 5.011383 | -0.001698 | 0.021152  | -0.013538 |
| Si | 0.631772  | 3.486686  | 4.508512 | 0.000398  | 0.002914  | 0.013151  |
| Si | 1.821370  | 10.314915 | 1.858278 | -0.000411 | -0.002938 | -0.013124 |
| Si | -0.333059 | 10.387486 | 5.041673 | -0.000433 | 0.002931  | -0.013100 |
| Si | 2.786201  | 3.414115  | 1.325117 | 0.000409  | -0.002942 | 0.013145  |
| O  | 0.061445  | 3.072947  | 3.041906 | 0.025101  | 0.027637  | -0.005132 |
| O  | 2.391697  | 10.728653 | 3.324884 | -0.025015 | -0.027598 | 0.005107  |
| O  | 4.546126  | 9.973747  | 0.141489 | -0.025008 | 0.027590  | 0.005120  |
| O  | -2.092984 | 3.827853  | 6.225301 | 0.025091  | -0.027640 | -0.005131 |

|   |           |           |          |           |           |           |
|---|-----------|-----------|----------|-----------|-----------|-----------|
| O | 2.197450  | 3.933608  | 4.519003 | 0.014347  | -0.048830 | -0.032399 |
| O | 0.255692  | 9.867992  | 1.847787 | -0.014353 | 0.048798  | 0.032362  |
| O | -1.898737 | 10.834409 | 5.031182 | -0.014364 | -0.048768 | 0.032343  |
| O | 4.351879  | 2.967192  | 1.335608 | 0.014357  | 0.048843  | -0.032438 |
| O | -0.212316 | 4.798696  | 5.055280 | 0.010896  | 0.011718  | 0.010076  |
| O | 2.665458  | 9.002905  | 1.311510 | -0.010856 | -0.011707 | -0.010053 |
| O | 0.511030  | 11.699496 | 4.494905 | -0.010878 | 0.011690  | -0.010061 |
| O | 1.942113  | 2.102105  | 1.871885 | 0.010907  | -0.011726 | 0.010130  |
| O | 0.525580  | 2.169271  | 5.472081 | -0.016173 | -0.007243 | -0.003782 |
| O | 1.927562  | 11.632329 | 0.894709 | 0.016098  | 0.007203  | 0.003767  |
| O | -0.226867 | 9.070071  | 4.078104 | 0.016130  | -0.007196 | 0.003772  |
| O | 2.680009  | 4.731529  | 2.288686 | -0.016124 | 0.007213  | -0.003779 |
| O | 0.058846  | 0.698526  | 2.444964 | 0.003183  | -0.009259 | -0.026594 |
| O | 2.394296  | 13.103075 | 3.921826 | -0.003169 | 0.009220  | 0.026574  |
| O | 4.548725  | 7.599326  | 0.738431 | -0.003181 | -0.009250 | 0.026540  |
| O | -2.095583 | 6.202275  | 5.628359 | 0.003190  | 0.009272  | -0.026594 |
| O | -2.459230 | 13.184059 | 5.445139 | -0.003938 | 0.025832  | 0.031633  |
| O | 4.912372  | 0.617542  | 0.921651 | 0.003943  | -0.025844 | -0.031662 |
| O | 2.757943  | 6.283259  | 4.105046 | 0.003936  | 0.025850  | -0.031658 |
| O | -0.304801 | 7.518342  | 2.261744 | -0.003972 | -0.025808 | 0.031618  |
| O | -0.175430 | 2.374756  | 0.744070 | -0.019153 | 0.005747  | 0.022021  |
| O | 2.628573  | 11.426844 | 5.622720 | 0.019116  | -0.005744 | -0.021985 |
| O | 4.783002  | 9.275557  | 2.439325 | 0.019128  | 0.005734  | -0.021984 |
| O | -2.329859 | 4.526044  | 3.927465 | -0.019138 | -0.005715 | 0.022005  |
| O | -1.223866 | 12.517207 | 2.155216 | -0.000150 | -0.010055 | 0.034004  |
| O | 3.677009  | 1.284394  | 4.211574 | 0.000162  | 0.010037  | -0.034036 |
| O | 5.831438  | 5.616407  | 1.028179 | 0.000166  | -0.010054 | -0.034006 |
| O | -3.378295 | 8.185194  | 5.338611 | -0.000155 | 0.010065  | 0.034016  |
| H | -0.637445 | 12.195109 | 2.878812 | 0.045355  | -0.003408 | 0.001021  |
| H | 3.090587  | 1.606491  | 3.487978 | -0.045409 | 0.003405  | -0.000991 |
| H | 5.245016  | 5.294309  | 0.304583 | -0.045383 | -0.003435 | -0.000971 |
| H | -2.791874 | 8.507292  | 6.062207 | 0.045365  | 0.003410  | 0.001022  |

114 f = 11.908810 THz      74.825258 2PiTHz      397.235122 cm-1      49.250896 meV

X                      Y                      Z                      dx                      dy                      dz

|    |           |           |          |           |           |           |
|----|-----------|-----------|----------|-----------|-----------|-----------|
| Li | 3.769818  | 9.645336  | 4.001386 | 0.040306  | 0.079317  | -0.068015 |
| Li | -1.316675 | 4.156264  | 2.365404 | 0.040427  | 0.079516  | -0.068134 |
| Li | -3.471104 | 2.744536  | 5.548798 | -0.040399 | 0.079417  | 0.068112  |
| Li | 5.924247  | 11.057064 | 0.817991 | -0.040349 | 0.079434  | 0.068055  |
| Na | 2.049025  | 6.784862  | 1.629696 | -0.001041 | 0.012160  | -0.000371 |
| Na | 0.404117  | 7.016739  | 4.737094 | -0.001025 | 0.012076  | -0.000335 |
| Na | 2.558546  | 13.685662 | 1.553699 | 0.001031  | 0.012126  | 0.000343  |
| Na | -0.105403 | 0.115939  | 4.813091 | 0.001035  | 0.012103  | 0.000362  |
| B  | 4.155007  | 8.978944  | 1.168663 | 0.010618  | 0.000729  | -0.011571 |
| B  | -1.701865 | 4.822656  | 5.198127 | 0.010622  | 0.000738  | -0.011594 |
| B  | 0.452564  | 2.078144  | 2.014732 | -0.010637 | 0.000738  | 0.011600  |
| B  | 2.000578  | 11.723457 | 4.352058 | -0.010600 | 0.000726  | 0.011561  |
| B  | -2.733891 | 11.746082 | 5.839177 | -0.013959 | -0.008682 | 0.001353  |
| B  | 5.187034  | 2.055518  | 0.527613 | -0.013999 | -0.008645 | 0.001348  |
| B  | 3.032605  | 4.845282  | 3.711007 | 0.014013  | -0.008663 | -0.001346 |
| B  | -0.579463 | 8.956318  | 2.655782 | 0.013949  | -0.008663 | -0.001351 |
| B  | -0.983708 | 0.054306  | 1.827988 | 0.023941  | 0.002821  | 0.004408  |
| B  | 3.436850  | 13.747295 | 4.538802 | 0.023938  | 0.002796  | 0.004390  |
| B  | 5.591279  | 6.955106  | 1.355407 | -0.023945 | 0.002790  | -0.004397 |
| B  | -3.138137 | 6.846495  | 5.011383 | -0.023941 | 0.002790  | -0.004407 |
| Si | 0.631772  | 3.486686  | 4.508512 | -0.003144 | -0.013755 | -0.008979 |
| Si | 1.821370  | 10.314915 | 1.858278 | -0.003186 | -0.013687 | -0.008979 |
| Si | -0.333059 | 10.387486 | 5.041673 | 0.003191  | -0.013639 | 0.008984  |
| Si | 2.786201  | 3.414115  | 1.325117 | 0.003158  | -0.013777 | 0.008958  |
| O  | 0.061445  | 3.072947  | 3.041906 | -0.009406 | 0.022433  | -0.017515 |
| O  | 2.391697  | 10.728653 | 3.324884 | -0.009440 | 0.022462  | -0.017519 |
| O  | 4.546126  | 9.973747  | 0.141489 | 0.009459  | 0.022462  | 0.017507  |
| O  | -2.092984 | 3.827853  | 6.225301 | 0.009359  | 0.022469  | 0.017535  |
| O  | 2.197450  | 3.933608  | 4.519003 | 0.003613  | -0.009056 | 0.010454  |
| O  | 0.255692  | 9.867992  | 1.847787 | 0.003588  | -0.009100 | 0.010303  |
| O  | -1.898737 | 10.834409 | 5.031182 | -0.003590 | -0.009096 | -0.010299 |
| O  | 4.351879  | 2.967192  | 1.335608 | -0.003608 | -0.009090 | -0.010412 |
| O  | -0.212316 | 4.798696  | 5.055280 | 0.015357  | -0.002583 | -0.002501 |
| O  | 2.665458  | 9.002905  | 1.311510 | 0.015434  | -0.002534 | -0.002213 |
| O  | 0.511030  | 11.699496 | 4.494905 | -0.015415 | -0.002491 | 0.002243  |
| O  | 1.942113  | 2.102105  | 1.871885 | -0.015384 | -0.002585 | 0.002459  |

|   |           |           |          |           |           |           |
|---|-----------|-----------|----------|-----------|-----------|-----------|
| O | 0.525580  | 2.169271  | 5.472081 | -0.020931 | -0.020166 | -0.011595 |
| O | 1.927562  | 11.632329 | 0.894709 | -0.020719 | -0.020123 | -0.011603 |
| O | -0.226867 | 9.070071  | 4.078104 | 0.020682  | -0.020092 | 0.011610  |
| O | 2.680009  | 4.731529  | 2.288686 | 0.020982  | -0.020202 | 0.011599  |
| O | 0.058846  | 0.698526  | 2.444964 | 0.031917  | -0.022204 | 0.018920  |
| O | 2.394296  | 13.103075 | 3.921826 | 0.031906  | -0.022223 | 0.018934  |
| O | 4.548725  | 7.599326  | 0.738431 | -0.031920 | -0.022229 | -0.018923 |
| O | -2.095583 | 6.202275  | 5.628359 | -0.031915 | -0.022209 | -0.018904 |
| O | -2.459230 | 13.184059 | 5.445139 | 0.021019  | 0.009763  | 0.018257  |
| O | 4.912372  | 0.617542  | 0.921651 | 0.021053  | 0.009805  | 0.018278  |
| O | 2.757943  | 6.283259  | 4.105046 | -0.021060 | 0.009774  | -0.018264 |
| O | -0.304801 | 7.518342  | 2.261744 | -0.021016 | 0.009771  | -0.018282 |
| O | -0.175430 | 2.374756  | 0.744070 | -0.020456 | 0.001544  | 0.017877  |
| O | 2.628573  | 11.426844 | 5.622720 | -0.020422 | 0.001376  | 0.017833  |
| O | 4.783002  | 9.275557  | 2.439325 | 0.020425  | 0.001411  | -0.017849 |
| O | -2.329859 | 4.526044  | 3.927465 | 0.020461  | 0.001553  | -0.017874 |
| O | -1.223866 | 12.517207 | 2.155216 | -0.017408 | -0.002758 | -0.046399 |
| O | 3.677009  | 1.284394  | 4.211574 | -0.017413 | -0.002790 | -0.046416 |
| O | 5.831438  | 5.616407  | 1.028179 | 0.017390  | -0.002800 | 0.046397  |
| O | -3.378295 | 8.185194  | 5.338611 | 0.017415  | -0.002785 | 0.046380  |
| H | -0.637445 | 12.195109 | 2.878812 | -0.072876 | -0.027364 | -0.011582 |
| H | 3.090587  | 1.606491  | 3.487978 | -0.072914 | -0.027387 | -0.011573 |
| H | 5.245016  | 5.294309  | 0.304583 | 0.072904  | -0.027392 | 0.011542  |
| H | -2.791874 | 8.507292  | 6.062207 | 0.072886  | -0.027383 | 0.011555  |

115 f = 11.803832 THz 74.165663 2PiTHz 393.733439 cm-1 48.816742 meV

|    | X         | Y         | Z        | dx        | dy        | dz        |
|----|-----------|-----------|----------|-----------|-----------|-----------|
| Li | 3.769818  | 9.645336  | 4.001386 | -0.007347 | 0.016003  | -0.001567 |
| Li | -1.316675 | 4.156264  | 2.365404 | -0.007343 | 0.015937  | -0.001516 |
| Li | -3.471104 | 2.744536  | 5.548798 | 0.007361  | 0.015961  | 0.001539  |
| Li | 5.924247  | 11.057064 | 0.817991 | 0.007318  | 0.016012  | 0.001557  |
| Na | 2.049025  | 6.784862  | 1.629696 | 0.003244  | -0.018607 | 0.004925  |
| Na | 0.404117  | 7.016739  | 4.737094 | 0.003221  | -0.018473 | 0.004832  |
| Na | 2.558546  | 13.685662 | 1.553699 | -0.003227 | -0.018537 | -0.004840 |
| Na | -0.105403 | 0.115939  | 4.813091 | -0.003237 | -0.018530 | -0.004912 |

|    |           |           |          |           |           |           |
|----|-----------|-----------|----------|-----------|-----------|-----------|
| B  | 4.155007  | 8.978944  | 1.168663 | -0.000159 | -0.002000 | 0.005543  |
| B  | -1.701865 | 4.822656  | 5.198127 | -0.000186 | -0.002048 | 0.005582  |
| B  | 0.452564  | 2.078144  | 2.014732 | 0.000186  | -0.002039 | -0.005587 |
| B  | 2.000578  | 11.723457 | 4.352058 | 0.000157  | -0.002021 | -0.005527 |
| B  | -2.733891 | 11.746082 | 5.839177 | 0.006916  | -0.003667 | 0.000052  |
| B  | 5.187034  | 2.055518  | 0.527613 | 0.006958  | -0.003711 | 0.000063  |
| B  | 3.032605  | 4.845282  | 3.711007 | -0.006978 | -0.003696 | -0.000060 |
| B  | -0.579463 | 8.956318  | 2.655782 | -0.006904 | -0.003684 | -0.000057 |
| B  | -0.983708 | 0.054306  | 1.827988 | 0.004544  | -0.008227 | 0.005787  |
| B  | 3.436850  | 13.747295 | 4.538802 | 0.004539  | -0.008196 | 0.005798  |
| B  | 5.591279  | 6.955106  | 1.355407 | -0.004545 | -0.008203 | -0.005796 |
| B  | -3.138137 | 6.846495  | 5.011383 | -0.004544 | -0.008199 | -0.005802 |
| Si | 0.631772  | 3.486686  | 4.508512 | -0.008569 | 0.030927  | -0.008905 |
| Si | 1.821370  | 10.314915 | 1.858278 | -0.008500 | 0.030784  | -0.008847 |
| Si | -0.333059 | 10.387486 | 5.041673 | 0.008493  | 0.030732  | 0.008841  |
| Si | 2.786201  | 3.414115  | 1.325117 | 0.008560  | 0.030953  | 0.008931  |
| O  | 0.061445  | 3.072947  | 3.041906 | -0.022242 | 0.014878  | -0.003863 |
| O  | 2.391697  | 10.728653 | 3.324884 | -0.022150 | 0.014823  | -0.003832 |
| O  | 4.546126  | 9.973747  | 0.141489 | 0.022145  | 0.014837  | 0.003842  |
| O  | -2.092984 | 3.827853  | 6.225301 | 0.022283  | 0.014846  | 0.003852  |
| O  | 2.197450  | 3.933608  | 4.519003 | -0.001224 | -0.005987 | -0.029322 |
| O  | 0.255692  | 9.867992  | 1.847787 | -0.001193 | -0.005915 | -0.029074 |
| O  | -1.898737 | 10.834409 | 5.031182 | 0.001193  | -0.005930 | 0.029072  |
| O  | 4.351879  | 2.967192  | 1.335608 | 0.001222  | -0.005947 | 0.029290  |
| O  | -0.212316 | 4.798696  | 5.055280 | 0.018715  | 0.021435  | 0.060173  |
| O  | 2.665458  | 9.002905  | 1.311510 | 0.018629  | 0.021340  | 0.059799  |
| O  | 0.511030  | 11.699496 | 4.494905 | -0.018630 | 0.021298  | -0.059797 |
| O  | 1.942113  | 2.102105  | 1.871885 | -0.018704 | 0.021440  | -0.060159 |
| O  | 0.525580  | 2.169271  | 5.472081 | 0.061375  | 0.021079  | -0.008607 |
| O  | 1.927562  | 11.632329 | 0.894709 | 0.060915  | 0.020964  | -0.008569 |
| O  | -0.226867 | 9.070071  | 4.078104 | -0.060901 | 0.020918  | 0.008569  |
| O  | 2.680009  | 4.731529  | 2.288686 | -0.061397 | 0.021125  | 0.008600  |
| O  | 0.058846  | 0.698526  | 2.444964 | 0.013103  | -0.016930 | 0.012457  |
| O  | 2.394296  | 13.103075 | 3.921826 | 0.013106  | -0.016908 | 0.012410  |
| O  | 4.548725  | 7.599326  | 0.738431 | -0.013086 | -0.016882 | -0.012420 |
| O  | -2.095583 | 6.202275  | 5.628359 | -0.013118 | -0.016933 | -0.012474 |



|   |           |           |          |           |           |           |
|---|-----------|-----------|----------|-----------|-----------|-----------|
| O | -2.459230 | 13.184059 | 5.445139 | 0.002858  | -0.006905 | 0.003836  |
| O | 4.912372  | 0.617542  | 0.921651 | 0.002816  | -0.006984 | 0.003796  |
| O | 2.757943  | 6.283259  | 4.105046 | -0.002811 | -0.006951 | -0.003824 |
| O | -0.304801 | 7.518342  | 2.261744 | -0.002872 | -0.006930 | -0.003813 |
| O | -0.175430 | 2.374756  | 0.744070 | 0.003108  | -0.039036 | -0.003136 |
| O | 2.628573  | 11.426844 | 5.622720 | 0.003080  | -0.038757 | -0.003107 |
| O | 4.783002  | 9.275557  | 2.439325 | -0.003067 | -0.038751 | 0.003118  |
| O | -2.329859 | 4.526044  | 3.927465 | -0.003132 | -0.039059 | 0.003146  |
| O | -1.223866 | 12.517207 | 2.155216 | -0.011306 | -0.012476 | -0.006835 |
| O | 3.677009  | 1.284394  | 4.211574 | -0.011308 | -0.012438 | -0.006836 |
| O | 5.831438  | 5.616407  | 1.028179 | 0.011315  | -0.012447 | 0.006843  |
| O | -3.378295 | 8.185194  | 5.338611 | 0.011302  | -0.012450 | 0.006841  |
| H | -0.637445 | 12.195109 | 2.878812 | -0.017554 | -0.018259 | -0.002555 |
| H | 3.090587  | 1.606491  | 3.487978 | -0.017555 | -0.018217 | -0.002546 |
| H | 5.245016  | 5.294309  | 0.304583 | 0.017570  | -0.018236 | 0.002549  |
| H | -2.791874 | 8.507292  | 6.062207 | 0.017533  | -0.018235 | 0.002576  |

116 f = 11.758801 THz 73.882726 2PiTHz 392.231372 cm-1 48.630510 meV

|    | X         | Y         | Z        | dx        | dy        | dz        |
|----|-----------|-----------|----------|-----------|-----------|-----------|
| Li | 3.769818  | 9.645336  | 4.001386 | -0.018035 | -0.012802 | 0.026145  |
| Li | -1.316675 | 4.156264  | 2.365404 | 0.017744  | 0.012685  | -0.025703 |
| Li | -3.471104 | 2.744536  | 5.548798 | -0.017832 | 0.012754  | 0.025799  |
| Li | 5.924247  | 11.057064 | 0.817991 | 0.017899  | -0.012866 | -0.025963 |
| Na | 2.049025  | 6.784862  | 1.629696 | -0.004053 | 0.009531  | -0.004538 |
| Na | 0.404117  | 7.016739  | 4.737094 | 0.004079  | -0.009682 | 0.004543  |
| Na | 2.558546  | 13.685662 | 1.553699 | -0.004084 | -0.009717 | -0.004549 |
| Na | -0.105403 | 0.115939  | 4.813091 | 0.004053  | 0.009530  | 0.004536  |
| B  | 4.155007  | 8.978944  | 1.168663 | -0.002904 | -0.006068 | 0.010929  |
| B  | -1.701865 | 4.822656  | 5.198127 | 0.002879  | 0.006070  | -0.010811 |
| B  | 0.452564  | 2.078144  | 2.014732 | -0.002862 | 0.006069  | 0.010822  |
| B  | 2.000578  | 11.723457 | 4.352058 | 0.002898  | -0.006080 | -0.010899 |
| B  | -2.733891 | 11.746082 | 5.839177 | 0.011314  | -0.002353 | 0.000511  |
| B  | 5.187034  | 2.055518  | 0.527613 | -0.011212 | 0.002340  | -0.000507 |
| B  | 3.032605  | 4.845282  | 3.711007 | 0.011204  | 0.002364  | 0.000505  |
| B  | -0.579463 | 8.956318  | 2.655782 | -0.011327 | -0.002354 | -0.000509 |

|    |           |           |          |           |           |           |
|----|-----------|-----------|----------|-----------|-----------|-----------|
| B  | -0.983708 | 0.054306  | 1.827988 | -0.000327 | 0.006439  | 0.003797  |
| B  | 3.436850  | 13.747295 | 4.538802 | 0.000280  | -0.006505 | -0.003809 |
| B  | 5.591279  | 6.955106  | 1.355407 | -0.000257 | -0.006534 | 0.003773  |
| B  | -3.138137 | 6.846495  | 5.011383 | 0.000354  | 0.006402  | -0.003814 |
| Si | 0.631772  | 3.486686  | 4.508512 | 0.005764  | -0.028472 | 0.006213  |
| Si | 1.821370  | 10.314915 | 1.858278 | -0.005781 | 0.028704  | -0.006217 |
| Si | -0.333059 | 10.387486 | 5.041673 | 0.005795  | 0.028690  | 0.006209  |
| Si | 2.786201  | 3.414115  | 1.325117 | -0.005748 | -0.028430 | -0.006217 |
| O  | 0.061445  | 3.072947  | 3.041906 | 0.015122  | -0.002308 | -0.000923 |
| O  | 2.391697  | 10.728653 | 3.324884 | -0.015213 | 0.002344  | 0.000972  |
| O  | 4.546126  | 9.973747  | 0.141489 | 0.015204  | 0.002343  | -0.000964 |
| O  | -2.092984 | 3.827853  | 6.225301 | -0.015117 | -0.002308 | 0.000918  |
| O  | 2.197450  | 3.933608  | 4.519003 | 0.002542  | 0.005008  | 0.034490  |
| O  | 0.255692  | 9.867992  | 1.847787 | -0.002559 | -0.005015 | -0.034727 |
| O  | -1.898737 | 10.834409 | 5.031182 | 0.002578  | -0.004989 | 0.034719  |
| O  | 4.351879  | 2.967192  | 1.335608 | -0.002544 | 0.005001  | -0.034486 |
| O  | -0.212316 | 4.798696  | 5.055280 | -0.013543 | -0.016017 | -0.059485 |
| O  | 2.665458  | 9.002905  | 1.311510 | 0.013623  | 0.016165  | 0.059852  |
| O  | 0.511030  | 11.699496 | 4.494905 | -0.013634 | 0.016160  | -0.059892 |
| O  | 1.942113  | 2.102105  | 1.871885 | 0.013547  | -0.015969 | 0.059485  |
| O  | 0.525580  | 2.169271  | 5.472081 | -0.068617 | -0.024187 | 0.003350  |
| O  | 1.927562  | 11.632329 | 0.894709 | 0.069094  | 0.024382  | -0.003355 |
| O  | -0.226867 | 9.070071  | 4.078104 | -0.069081 | 0.024363  | 0.003353  |
| O  | 2.680009  | 4.731529  | 2.288686 | 0.068593  | -0.024163 | -0.003348 |
| O  | 0.058846  | 0.698526  | 2.444964 | 0.000762  | 0.007444  | -0.005703 |
| O  | 2.394296  | 13.103075 | 3.921826 | -0.000798 | -0.007475 | 0.005714  |
| O  | 4.548725  | 7.599326  | 0.738431 | 0.000832  | -0.007455 | -0.005709 |
| O  | -2.095583 | 6.202275  | 5.628359 | -0.000749 | 0.007434  | 0.005749  |
| O  | -2.459230 | 13.184059 | 5.445139 | -0.007380 | -0.008783 | -0.002693 |
| O  | 4.912372  | 0.617542  | 0.921651 | 0.007331  | 0.008686  | 0.002609  |
| O  | 2.757943  | 6.283259  | 4.105046 | -0.007310 | 0.008672  | -0.002631 |
| O  | -0.304801 | 7.518342  | 2.261744 | 0.007387  | -0.008786 | 0.002649  |
| O  | -0.175430 | 2.374756  | 0.744070 | -0.010296 | 0.041939  | 0.010705  |
| O  | 2.628573  | 11.426844 | 5.622720 | 0.010381  | -0.042223 | -0.010784 |
| O  | 4.783002  | 9.275557  | 2.439325 | -0.010411 | -0.042184 | 0.010836  |
| O  | -2.329859 | 4.526044  | 3.927465 | 0.010289  | 0.041991  | -0.010698 |

|   |           |           |          |           |           |           |
|---|-----------|-----------|----------|-----------|-----------|-----------|
| O | -1.223866 | 12.517207 | 2.155216 | -0.004121 | 0.008937  | 0.002421  |
| O | 3.677009  | 1.284394  | 4.211574 | 0.004105  | -0.009002 | -0.002321 |
| O | 5.831438  | 5.616407  | 1.028179 | -0.004094 | -0.009047 | 0.002305  |
| O | -3.378295 | 8.185194  | 5.338611 | 0.004108  | 0.008895  | -0.002481 |
| H | -0.637445 | 12.195109 | 2.878812 | 0.000840  | 0.005883  | -0.001419 |
| H | 3.090587  | 1.606491  | 3.487978 | -0.000700 | -0.005908 | 0.001425  |
| H | 5.245016  | 5.294309  | 0.304583 | 0.000729  | -0.005952 | -0.001451 |
| H | -2.791874 | 8.507292  | 6.062207 | -0.000900 | 0.005864  | 0.001391  |

117 f = 11.497788 THz 72.242734 2PiTHz 383.524921 cm-1 47.551047 meV

|    | X         | Y         | Z        | dx        | dy        | dz        |
|----|-----------|-----------|----------|-----------|-----------|-----------|
| Li | 3.769818  | 9.645336  | 4.001386 | 0.080430  | 0.008298  | -0.104383 |
| Li | -1.316675 | 4.156264  | 2.365404 | 0.080263  | 0.010487  | -0.103688 |
| Li | -3.471104 | 2.744536  | 5.548798 | 0.080156  | -0.010441 | -0.103633 |
| Li | 5.924247  | 11.057064 | 0.817991 | 0.080483  | -0.008288 | -0.104377 |
| Na | 2.049025  | 6.784862  | 1.629696 | -0.000322 | 0.000014  | 0.001380  |
| Na | 0.404117  | 7.016739  | 4.737094 | -0.000252 | -0.000276 | 0.001457  |
| Na | 2.558546  | 13.685662 | 1.553699 | -0.000257 | 0.000265  | 0.001450  |
| Na | -0.105403 | 0.115939  | 4.813091 | -0.000315 | 0.000012  | 0.001389  |
| B  | 4.155007  | 8.978944  | 1.168663 | -0.006526 | -0.001447 | -0.006976 |
| B  | -1.701865 | 4.822656  | 5.198127 | -0.006813 | -0.001465 | -0.006907 |
| B  | 0.452564  | 2.078144  | 2.014732 | -0.006816 | 0.001466  | -0.006881 |
| B  | 2.000578  | 11.723457 | 4.352058 | -0.006529 | 0.001445  | -0.006993 |
| B  | -2.733891 | 11.746082 | 5.839177 | 0.006274  | 0.005307  | -0.004929 |
| B  | 5.187034  | 2.055518  | 0.527613 | 0.006271  | 0.005497  | -0.004853 |
| B  | 3.032605  | 4.845282  | 3.711007 | 0.006302  | -0.005513 | -0.004840 |
| B  | -0.579463 | 8.956318  | 2.655782 | 0.006257  | -0.005302 | -0.004942 |
| B  | -0.983708 | 0.054306  | 1.827988 | -0.012783 | -0.023807 | 0.018801  |
| B  | 3.436850  | 13.747295 | 4.538802 | -0.012734 | -0.023898 | 0.018976  |
| B  | 5.591279  | 6.955106  | 1.355407 | -0.012759 | 0.023892  | 0.018957  |
| B  | -3.138137 | 6.846495  | 5.011383 | -0.012767 | 0.023811  | 0.018809  |
| Si | 0.631772  | 3.486686  | 4.508512 | -0.012026 | 0.018104  | 0.009485  |
| Si | 1.821370  | 10.314915 | 1.858278 | -0.012204 | 0.017790  | 0.009703  |
| Si | -0.333059 | 10.387486 | 5.041673 | -0.012210 | -0.017772 | 0.009730  |
| Si | 2.786201  | 3.414115  | 1.325117 | -0.012012 | -0.018137 | 0.009456  |

|   |           |           |          |           |           |           |
|---|-----------|-----------|----------|-----------|-----------|-----------|
| O | 0.061445  | 3.072947  | 3.041906 | 0.007402  | 0.004604  | 0.002696  |
| O | 2.391697  | 10.728653 | 3.324884 | 0.007968  | 0.004803  | 0.002523  |
| O | 4.546126  | 9.973747  | 0.141489 | 0.007989  | -0.004781 | 0.002547  |
| O | -2.092984 | 3.827853  | 6.225301 | 0.007380  | -0.004621 | 0.002680  |
| O | 2.197450  | 3.933608  | 4.519003 | -0.008083 | 0.002178  | -0.016726 |
| O | 0.255692  | 9.867992  | 1.847787 | -0.008290 | 0.002091  | -0.017152 |
| O | -1.898737 | 10.834409 | 5.031182 | -0.008307 | -0.002108 | -0.017107 |
| O | 4.351879  | 2.967192  | 1.335608 | -0.008061 | -0.002154 | -0.016795 |
| O | -0.212316 | 4.798696  | 5.055280 | -0.001699 | 0.024115  | 0.010545  |
| O | 2.665458  | 9.002905  | 1.311510 | -0.001350 | 0.024021  | 0.011196  |
| O | 0.511030  | 11.699496 | 4.494905 | -0.001378 | -0.024014 | 0.011129  |
| O | 1.942113  | 2.102105  | 1.871885 | -0.001676 | -0.024123 | 0.010622  |
| O | 0.525580  | 2.169271  | 5.472081 | 0.004380  | -0.001258 | -0.006378 |
| O | 1.927562  | 11.632329 | 0.894709 | 0.003792  | -0.001675 | -0.006389 |
| O | -0.226867 | 9.070071  | 4.078104 | 0.003710  | 0.001700  | -0.006386 |
| O | 2.680009  | 4.731529  | 2.288686 | 0.004497  | 0.001213  | -0.006375 |
| O | 0.058846  | 0.698526  | 2.444964 | -0.007978 | -0.002877 | -0.014611 |
| O | 2.394296  | 13.103075 | 3.921826 | -0.008114 | -0.002717 | -0.014313 |
| O | 4.548725  | 7.599326  | 0.738431 | -0.008141 | 0.002701  | -0.014330 |
| O | -2.095583 | 6.202275  | 5.628359 | -0.007963 | 0.002884  | -0.014604 |
| O | -2.459230 | 13.184059 | 5.445139 | -0.007313 | -0.002887 | 0.025914  |
| O | 4.912372  | 0.617542  | 0.921651 | -0.007529 | -0.002982 | 0.025746  |
| O | 2.757943  | 6.283259  | 4.105046 | -0.007514 | 0.002959  | 0.025781  |
| O | -0.304801 | 7.518342  | 2.261744 | -0.007331 | 0.002912  | 0.025860  |
| O | -0.175430 | 2.374756  | 0.744070 | 0.004932  | 0.043365  | -0.010702 |
| O | 2.628573  | 11.426844 | 5.622720 | 0.005137  | 0.043455  | -0.010990 |
| O | 4.783002  | 9.275557  | 2.439325 | 0.005125  | -0.043492 | -0.010976 |
| O | -2.329859 | 4.526044  | 3.927465 | 0.004962  | -0.043326 | -0.010726 |
| O | -1.223866 | 12.517207 | 2.155216 | 0.002289  | -0.030208 | 0.030216  |
| O | 3.677009  | 1.284394  | 4.211574 | 0.002026  | -0.030333 | 0.030035  |
| O | 5.831438  | 5.616407  | 1.028179 | 0.002028  | 0.030316  | 0.030064  |
| O | -3.378295 | 8.185194  | 5.338611 | 0.002283  | 0.030217  | 0.030201  |
| H | -0.637445 | 12.195109 | 2.878812 | 0.017827  | -0.029259 | 0.017685  |
| H | 3.090587  | 1.606491  | 3.487978 | 0.017342  | -0.029549 | 0.017619  |
| H | 5.245016  | 5.294309  | 0.304583 | 0.017388  | 0.029503  | 0.017628  |
| H | -2.791874 | 8.507292  | 6.062207 | 0.017823  | 0.029285  | 0.017656  |

118 f = 11.484098 THz 72.156717 2PiTHz 383.068269 cm-1 47.494429  
meV

|    | X         | Y         | Z        | dx        | dy        | dz        |
|----|-----------|-----------|----------|-----------|-----------|-----------|
| Li | 3.769818  | 9.645336  | 4.001386 | 0.011922  | -0.119920 | -0.037851 |
| Li | -1.316675 | 4.156264  | 2.365404 | -0.013396 | 0.119834  | 0.039803  |
| Li | -3.471104 | 2.744536  | 5.548798 | -0.013405 | -0.119878 | 0.039754  |
| Li | 5.924247  | 11.057064 | 0.817991 | 0.011979  | 0.119836  | -0.037906 |
| Na | 2.049025  | 6.784862  | 1.629696 | -0.004423 | 0.015471  | -0.002976 |
| Na | 0.404117  | 7.016739  | 4.737094 | 0.004439  | -0.015437 | 0.002934  |
| Na | 2.558546  | 13.685662 | 1.553699 | 0.004436  | 0.015448  | 0.002929  |
| Na | -0.105403 | 0.115939  | 4.813091 | -0.004420 | -0.015448 | -0.002974 |
| B  | 4.155007  | 8.978944  | 1.168663 | 0.015617  | 0.000808  | -0.005052 |
| B  | -1.701865 | 4.822656  | 5.198127 | -0.015516 | -0.000811 | 0.005193  |
| B  | 0.452564  | 2.078144  | 2.014732 | -0.015510 | 0.000809  | 0.005187  |
| B  | 2.000578  | 11.723457 | 4.352058 | 0.015621  | -0.000826 | -0.005068 |
| B  | -2.733891 | 11.746082 | 5.839177 | -0.001596 | -0.011532 | -0.005514 |
| B  | 5.187034  | 2.055518  | 0.527613 | 0.001488  | 0.011448  | 0.005605  |
| B  | 3.032605  | 4.845282  | 3.711007 | 0.001486  | -0.011442 | 0.005604  |
| B  | -0.579463 | 8.956318  | 2.655782 | -0.001612 | 0.011535  | -0.005503 |
| B  | -0.983708 | 0.054306  | 1.827988 | -0.001306 | 0.005821  | -0.008362 |
| B  | 3.436850  | 13.747295 | 4.538802 | 0.001519  | -0.005433 | 0.008024  |
| B  | 5.591279  | 6.955106  | 1.355407 | 0.001543  | 0.005395  | 0.008024  |
| B  | -3.138137 | 6.846495  | 5.011383 | -0.001276 | -0.005847 | -0.008361 |
| Si | 0.631772  | 3.486686  | 4.508512 | 0.010266  | 0.018956  | -0.013305 |
| Si | 1.821370  | 10.314915 | 1.858278 | -0.010039 | -0.019234 | 0.013142  |
| Si | -0.333059 | 10.387486 | 5.041673 | -0.010038 | 0.019298  | 0.013135  |
| Si | 2.786201  | 3.414115  | 1.325117 | 0.010258  | -0.018934 | -0.013318 |
| O  | 0.061445  | 3.072947  | 3.041906 | -0.032046 | -0.009994 | 0.008652  |
| O  | 2.391697  | 10.728653 | 3.324884 | 0.031893  | 0.009936  | -0.008694 |
| O  | 4.546126  | 9.973747  | 0.141489 | 0.031907  | -0.009953 | -0.008716 |
| O  | -2.092984 | 3.827853  | 6.225301 | -0.032074 | 0.009983  | 0.008639  |
| O  | 2.197450  | 3.933608  | 4.519003 | 0.012441  | 0.004108  | 0.021208  |
| O  | 0.255692  | 9.867992  | 1.847787 | -0.012285 | -0.004135 | -0.020897 |
| O  | -1.898737 | 10.834409 | 5.031182 | -0.012282 | 0.004153  | -0.020877 |
| O  | 4.351879  | 2.967192  | 1.335608 | 0.012444  | -0.004088 | 0.021209  |

|   |           |           |          |           |           |           |
|---|-----------|-----------|----------|-----------|-----------|-----------|
| O | -0.212316 | 4.798696  | 5.055280 | -0.017774 | 0.005931  | -0.032507 |
| O | 2.665458  | 9.002905  | 1.311510 | 0.017782  | -0.006347 | 0.032327  |
| O | 0.511030  | 11.699496 | 4.494905 | 0.017771  | 0.006380  | 0.032247  |
| O | 1.942113  | 2.102105  | 1.871885 | -0.017759 | -0.005925 | -0.032500 |
| O | 0.525580  | 2.169271  | 5.472081 | 0.039630  | 0.025451  | 0.001291  |
| O | 1.927562  | 11.632329 | 0.894709 | -0.039635 | -0.025390 | -0.001176 |
| O | -0.226867 | 9.070071  | 4.078104 | -0.039707 | 0.025452  | -0.001181 |
| O | 2.680009  | 4.731529  | 2.288686 | 0.039614  | -0.025428 | 0.001281  |
| O | 0.058846  | 0.698526  | 2.444964 | 0.009281  | -0.009388 | -0.014747 |
| O | 2.394296  | 13.103075 | 3.921826 | -0.009155 | 0.009431  | 0.014996  |
| O | 4.548725  | 7.599326  | 0.738431 | -0.009125 | -0.009446 | 0.014991  |
| O | -2.095583 | 6.202275  | 5.628359 | 0.009323  | 0.009402  | -0.014732 |
| O | -2.459230 | 13.184059 | 5.445139 | 0.011551  | 0.002906  | 0.005269  |
| O | 4.912372  | 0.617542  | 0.921651 | -0.011419 | -0.002890 | -0.005756 |
| O | 2.757943  | 6.283259  | 4.105046 | -0.011401 | 0.002860  | -0.005730 |
| O | -0.304801 | 7.518342  | 2.261744 | 0.011566  | -0.002939 | 0.005290  |
| O | -0.175430 | 2.374756  | 0.744070 | -0.009507 | -0.007319 | 0.015174  |
| O | 2.628573  | 11.426844 | 5.622720 | 0.009426  | 0.006515  | -0.014994 |
| O | 4.783002  | 9.275557  | 2.439325 | 0.009399  | -0.006579 | -0.014963 |
| O | -2.329859 | 4.526044  | 3.927465 | -0.009519 | 0.007326  | 0.015187  |
| O | -1.223866 | 12.517207 | 2.155216 | 0.014336  | 0.006965  | 0.007394  |
| O | 3.677009  | 1.284394  | 4.211574 | -0.014381 | -0.006461 | -0.007873 |
| O | 5.831438  | 5.616407  | 1.028179 | -0.014383 | 0.006422  | -0.007916 |
| O | -3.378295 | 8.185194  | 5.338611 | 0.014324  | -0.006986 | 0.007334  |
| H | -0.637445 | 12.195109 | 2.878812 | 0.024717  | 0.014204  | 0.001429  |
| H | 3.090587  | 1.606491  | 3.487978 | -0.024984 | -0.013681 | -0.001713 |
| H | 5.245016  | 5.294309  | 0.304583 | -0.025026 | 0.013667  | -0.001734 |
| H | -2.791874 | 8.507292  | 6.062207 | 0.024644  | -0.014186 | 0.001398  |

119 f = 11.243610 THz 70.645682 2PiTHz 375.046432 cm-1 46.499848  
meV

|    | X         | Y         | Z        | dx        | dy        | dz       |
|----|-----------|-----------|----------|-----------|-----------|----------|
| Li | 3.769818  | 9.645336  | 4.001386 | -0.019451 | 0.127958  | 0.041562 |
| Li | -1.316675 | 4.156264  | 2.365404 | -0.019371 | 0.127861  | 0.041522 |
| Li | -3.471104 | 2.744536  | 5.548798 | -0.019487 | -0.127845 | 0.041529 |
| Li | 5.924247  | 11.057064 | 0.817991 | -0.019400 | -0.127923 | 0.041586 |

|    |           |           |          |           |           |           |
|----|-----------|-----------|----------|-----------|-----------|-----------|
| Na | 2.049025  | 6.784862  | 1.629696 | -0.001711 | 0.005100  | -0.001801 |
| Na | 0.404117  | 7.016739  | 4.737094 | -0.001721 | 0.005103  | -0.001810 |
| Na | 2.558546  | 13.685662 | 1.553699 | -0.001720 | -0.005107 | -0.001808 |
| Na | -0.105403 | 0.115939  | 4.813091 | -0.001710 | -0.005084 | -0.001801 |
| B  | 4.155007  | 8.978944  | 1.168663 | -0.012719 | -0.010192 | 0.005355  |
| B  | -1.701865 | 4.822656  | 5.198127 | -0.012698 | -0.010193 | 0.005354  |
| B  | 0.452564  | 2.078144  | 2.014732 | -0.012699 | 0.010188  | 0.005365  |
| B  | 2.000578  | 11.723457 | 4.352058 | -0.012714 | 0.010204  | 0.005352  |
| B  | -2.733891 | 11.746082 | 5.839177 | -0.001754 | 0.010570  | 0.011507  |
| B  | 5.187034  | 2.055518  | 0.527613 | -0.001772 | 0.010555  | 0.011488  |
| B  | 3.032605  | 4.845282  | 3.711007 | -0.001759 | -0.010565 | 0.011496  |
| B  | -0.579463 | 8.956318  | 2.655782 | -0.001769 | -0.010572 | 0.011497  |
| B  | -0.983708 | 0.054306  | 1.827988 | 0.008315  | -0.027108 | -0.005891 |
| B  | 3.436850  | 13.747295 | 4.538802 | 0.008329  | -0.027097 | -0.005868 |
| B  | 5.591279  | 6.955106  | 1.355407 | 0.008305  | 0.027106  | -0.005890 |
| B  | -3.138137 | 6.846495  | 5.011383 | 0.008337  | 0.027109  | -0.005865 |
| Si | 0.631772  | 3.486686  | 4.508512 | 0.000617  | 0.004999  | -0.005446 |
| Si | 1.821370  | 10.314915 | 1.858278 | 0.000652  | 0.004976  | -0.005474 |
| Si | -0.333059 | 10.387486 | 5.041673 | 0.000651  | -0.005006 | -0.005473 |
| Si | 2.786201  | 3.414115  | 1.325117 | 0.000641  | -0.004981 | -0.005464 |
| O  | 0.061445  | 3.072947  | 3.041906 | -0.003901 | 0.034003  | -0.015042 |
| O  | 2.391697  | 10.728653 | 3.324884 | -0.003943 | 0.033996  | -0.015050 |
| O  | 4.546126  | 9.973747  | 0.141489 | -0.003938 | -0.033979 | -0.015033 |
| O  | -2.092984 | 3.827853  | 6.225301 | -0.003910 | -0.034024 | -0.015065 |
| O  | 2.197450  | 3.933608  | 4.519003 | 0.008664  | -0.021865 | 0.002479  |
| O  | 0.255692  | 9.867992  | 1.847787 | 0.008701  | -0.021893 | 0.002502  |
| O  | -1.898737 | 10.834409 | 5.031182 | 0.008689  | 0.021860  | 0.002505  |
| O  | 4.351879  | 2.967192  | 1.335608 | 0.008693  | 0.021894  | 0.002471  |
| O  | -0.212316 | 4.798696  | 5.055280 | -0.010286 | 0.004221  | -0.020521 |
| O  | 2.665458  | 9.002905  | 1.311510 | -0.010304 | 0.004190  | -0.020580 |
| O  | 0.511030  | 11.699496 | 4.494905 | -0.010309 | -0.004205 | -0.020584 |
| O  | 1.942113  | 2.102105  | 1.871885 | -0.010277 | -0.004203 | -0.020521 |
| O  | 0.525580  | 2.169271  | 5.472081 | 0.022679  | 0.001338  | -0.002948 |
| O  | 1.927562  | 11.632329 | 0.894709 | 0.022708  | 0.001354  | -0.002930 |
| O  | -0.226867 | 9.070071  | 4.078104 | 0.022715  | -0.001378 | -0.002935 |
| O  | 2.680009  | 4.731529  | 2.288686 | 0.022677  | -0.001337 | -0.002942 |

|   |           |           |          |           |           |           |
|---|-----------|-----------|----------|-----------|-----------|-----------|
| O | 0.058846  | 0.698526  | 2.444964 | 0.012029  | -0.017255 | -0.012529 |
| O | 2.394296  | 13.103075 | 3.921826 | 0.012048  | -0.017258 | -0.012524 |
| O | 4.548725  | 7.599326  | 0.738431 | 0.012022  | 0.017253  | -0.012534 |
| O | -2.095583 | 6.202275  | 5.628359 | 0.012058  | 0.017263  | -0.012525 |
| O | -2.459230 | 13.184059 | 5.445139 | 0.015737  | -0.011277 | -0.006316 |
| O | 4.912372  | 0.617542  | 0.921651 | 0.015720  | -0.011310 | -0.006368 |
| O | 2.757943  | 6.283259  | 4.105046 | 0.015749  | 0.011268  | -0.006303 |
| O | -0.304801 | 7.518342  | 2.261744 | 0.015703  | 0.011316  | -0.006370 |
| O | -0.175430 | 2.374756  | 0.744070 | -0.017448 | 0.021552  | 0.023373  |
| O | 2.628573  | 11.426844 | 5.622720 | -0.017445 | 0.021588  | 0.023372  |
| O | 4.783002  | 9.275557  | 2.439325 | -0.017458 | -0.021561 | 0.023378  |
| O | -2.329859 | 4.526044  | 3.927465 | -0.017429 | -0.021575 | 0.023357  |
| O | -1.223866 | 12.517207 | 2.155216 | -0.013257 | -0.024506 | 0.017038  |
| O | 3.677009  | 1.284394  | 4.211574 | -0.013264 | -0.024509 | 0.017004  |
| O | 5.831438  | 5.616407  | 1.028179 | -0.013231 | 0.024508  | 0.017053  |
| O | -3.378295 | 8.185194  | 5.338611 | -0.013277 | 0.024515  | 0.017011  |
| H | -0.637445 | 12.195109 | 2.878812 | -0.006875 | -0.015189 | 0.016715  |
| H | 3.090587  | 1.606491  | 3.487978 | -0.006906 | -0.015240 | 0.016675  |
| H | 5.245016  | 5.294309  | 0.304583 | -0.006819 | 0.015187  | 0.016706  |
| H | -2.791874 | 8.507292  | 6.062207 | -0.006898 | 0.015241  | 0.016670  |

120 f = 10.936499 THz      68.716049 2PiTHz      364.802326 cm-1      45.229740 meV

|    | X         | Y         | Z        | dx        | dy        | dz        |
|----|-----------|-----------|----------|-----------|-----------|-----------|
| Li | 3.769818  | 9.645336  | 4.001386 | 0.053943  | 0.107410  | -0.041801 |
| Li | -1.316675 | 4.156264  | 2.365404 | -0.054176 | -0.107334 | 0.042310  |
| Li | -3.471104 | 2.744536  | 5.548798 | 0.053853  | -0.107448 | -0.041713 |
| Li | 5.924247  | 11.057064 | 0.817991 | -0.054082 | 0.107480  | 0.042200  |
| Na | 2.049025  | 6.784862  | 1.629696 | -0.000993 | 0.000940  | -0.000018 |
| Na | 0.404117  | 7.016739  | 4.737094 | 0.001001  | -0.000828 | -0.000030 |
| Na | 2.558546  | 13.685662 | 1.553699 | -0.000989 | -0.000982 | 0.000021  |
| Na | -0.105403 | 0.115939  | 4.813091 | 0.001010  | 0.000881  | 0.000036  |
| B  | 4.155007  | 8.978944  | 1.168663 | 0.010474  | -0.000579 | 0.004793  |
| B  | -1.701865 | 4.822656  | 5.198127 | -0.010477 | 0.000695  | -0.004741 |
| B  | 0.452564  | 2.078144  | 2.014732 | 0.010471  | 0.000635  | 0.004778  |
| B  | 2.000578  | 11.723457 | 4.352058 | -0.010507 | -0.000706 | -0.004731 |



|    |           |           |          |           |           |           |
|----|-----------|-----------|----------|-----------|-----------|-----------|
| B  | -2.733891 | 11.746082 | 5.839177 | -0.003330 | -0.001967 | 0.007108  |
| B  | 5.187034  | 2.055518  | 0.527613 | 0.003330  | 0.002082  | -0.007253 |
| B  | 3.032605  | 4.845282  | 3.711007 | -0.003364 | 0.001968  | 0.007124  |
| B  | -0.579463 | 8.956318  | 2.655782 | 0.003328  | -0.002130 | -0.007282 |
| B  | -0.983708 | 0.054306  | 1.827988 | -0.000563 | 0.030178  | -0.010985 |
| B  | 3.436850  | 13.747295 | 4.538802 | 0.000370  | -0.030128 | 0.010687  |
| B  | 5.591279  | 6.955106  | 1.355407 | -0.000617 | -0.030198 | -0.010989 |
| B  | -3.138137 | 6.846495  | 5.011383 | 0.000393  | 0.030097  | 0.010678  |
| Si | 0.631772  | 3.486686  | 4.508512 | -0.000297 | 0.001779  | 0.023568  |
| Si | 1.821370  | 10.314915 | 1.858278 | 0.000305  | -0.001329 | -0.023572 |
| Si | -0.333059 | 10.387486 | 5.041673 | -0.000271 | -0.001826 | 0.023542  |
| Si | 2.786201  | 3.414115  | 1.325117 | 0.000357  | 0.001395  | -0.023644 |
| O  | 0.061445  | 3.072947  | 3.041906 | 0.002355  | -0.030584 | 0.028164  |
| O  | 2.391697  | 10.728653 | 3.324884 | -0.002574 | 0.030520  | -0.027992 |
| O  | 4.546126  | 9.973747  | 0.141489 | 0.002401  | 0.030665  | 0.028184  |
| O  | -2.092984 | 3.827853  | 6.225301 | -0.002542 | -0.030571 | -0.028075 |
| O  | 2.197450  | 3.933608  | 4.519003 | 0.000810  | -0.006742 | 0.011342  |
| O  | 0.255692  | 9.867992  | 1.847787 | -0.000637 | 0.006602  | -0.011384 |
| O  | -1.898737 | 10.834409 | 5.031182 | 0.000843  | 0.006779  | 0.011263  |
| O  | 4.351879  | 2.967192  | 1.335608 | -0.000610 | -0.006628 | -0.011338 |
| O  | -0.212316 | 4.798696  | 5.055280 | -0.007335 | 0.001077  | 0.007068  |
| O  | 2.665458  | 9.002905  | 1.311510 | 0.007490  | -0.000795 | -0.006562 |
| O  | 0.511030  | 11.699496 | 4.494905 | -0.007358 | -0.001129 | 0.006970  |
| O  | 1.942113  | 2.102105  | 1.871885 | 0.007453  | 0.000915  | -0.006640 |
| O  | 0.525580  | 2.169271  | 5.472081 | -0.029897 | -0.001411 | 0.010355  |
| O  | 1.927562  | 11.632329 | 0.894709 | 0.029920  | 0.001805  | -0.010387 |
| O  | -0.226867 | 9.070071  | 4.078104 | -0.029900 | 0.001349  | 0.010350  |
| O  | 2.680009  | 4.731529  | 2.288686 | 0.029899  | -0.001799 | -0.010387 |
| O  | 0.058846  | 0.698526  | 2.444964 | -0.008428 | 0.010035  | 0.014680  |
| O  | 2.394296  | 13.103075 | 3.921826 | 0.008427  | -0.010066 | -0.015272 |
| O  | 4.548725  | 7.599326  | 0.738431 | -0.008469 | -0.010033 | 0.014666  |
| O  | -2.095583 | 6.202275  | 5.628359 | 0.008468  | 0.010067  | -0.015268 |
| O  | -2.459230 | 13.184059 | 5.445139 | 0.007039  | -0.014502 | 0.006630  |
| O  | 4.912372  | 0.617542  | 0.921651 | -0.007568 | 0.014498  | -0.006721 |
| O  | 2.757943  | 6.283259  | 4.105046 | 0.007062  | 0.014505  | 0.006603  |
| O  | -0.304801 | 7.518342  | 2.261744 | -0.007614 | -0.014523 | -0.006727 |

|   |           |           |          |           |           |           |
|---|-----------|-----------|----------|-----------|-----------|-----------|
| O | -0.175430 | 2.374756  | 0.744070 | 0.013733  | -0.022692 | -0.009907 |
| O | 2.628573  | 11.426844 | 5.622720 | -0.013674 | 0.022547  | 0.009880  |
| O | 4.783002  | 9.275557  | 2.439325 | 0.013747  | 0.022643  | -0.009896 |
| O | -2.329859 | 4.526044  | 3.927465 | -0.013692 | -0.022514 | 0.009884  |
| O | -1.223866 | 12.517207 | 2.155216 | 0.007623  | 0.025236  | -0.037680 |
| O | 3.677009  | 1.284394  | 4.211574 | -0.007197 | -0.025122 | 0.038036  |
| O | 5.831438  | 5.616407  | 1.028179 | 0.007684  | -0.025265 | -0.037587 |
| O | -3.378295 | 8.185194  | 5.338611 | -0.007248 | 0.025080  | 0.038011  |
| H | -0.637445 | 12.195109 | 2.878812 | -0.011512 | 0.021651  | -0.023558 |
| H | 3.090587  | 1.606491  | 3.487978 | 0.012391  | -0.021034 | 0.023784  |
| H | 5.245016  | 5.294309  | 0.304583 | -0.011341 | -0.021747 | -0.023522 |
| H | -2.791874 | 8.507292  | 6.062207 | 0.012267  | 0.021051  | 0.023788  |

121 f = 10.924359 THz 68.639769 2PiTHz 364.397366 cm-1 45.179531 meV

|    | X         | Y         | Z        | dx        | dy        | dz        |
|----|-----------|-----------|----------|-----------|-----------|-----------|
| Li | 3.769818  | 9.645336  | 4.001386 | -0.021144 | 0.000430  | 0.039156  |
| Li | -1.316675 | 4.156264  | 2.365404 | -0.020657 | 0.001753  | 0.038517  |
| Li | -3.471104 | 2.744536  | 5.548798 | -0.021132 | -0.000422 | 0.039156  |
| Li | 5.924247  | 11.057064 | 0.817991 | -0.020677 | -0.001726 | 0.038519  |
| Na | 2.049025  | 6.784862  | 1.629696 | 0.001229  | 0.009505  | 0.000186  |
| Na | 0.404117  | 7.016739  | 4.737094 | 0.001215  | 0.009449  | 0.000194  |
| Na | 2.558546  | 13.685662 | 1.553699 | 0.001222  | -0.009508 | 0.000173  |
| Na | -0.105403 | 0.115939  | 4.813091 | 0.001225  | -0.009432 | 0.000209  |
| B  | 4.155007  | 8.978944  | 1.168663 | -0.000913 | 0.008117  | 0.003937  |
| B  | -1.701865 | 4.822656  | 5.198127 | -0.000775 | 0.008131  | 0.003981  |
| B  | 0.452564  | 2.078144  | 2.014732 | -0.000908 | -0.008100 | 0.003930  |
| B  | 2.000578  | 11.723457 | 4.352058 | -0.000776 | -0.008130 | 0.004000  |
| B  | -2.733891 | 11.746082 | 5.839177 | -0.001310 | 0.011640  | -0.012129 |
| B  | 5.187034  | 2.055518  | 0.527613 | -0.001333 | 0.011582  | -0.012039 |
| B  | 3.032605  | 4.845282  | 3.711007 | -0.001321 | -0.011640 | -0.012128 |
| B  | -0.579463 | 8.956318  | 2.655782 | -0.001326 | -0.011593 | -0.012054 |
| B  | -0.983708 | 0.054306  | 1.827988 | -0.017023 | 0.005929  | -0.024780 |
| B  | 3.436850  | 13.747295 | 4.538802 | -0.017095 | 0.006260  | -0.024984 |
| B  | 5.591279  | 6.955106  | 1.355407 | -0.017026 | -0.005908 | -0.024791 |
| B  | -3.138137 | 6.846495  | 5.011383 | -0.017099 | -0.006267 | -0.024983 |

|    |           |           |          |           |           |           |
|----|-----------|-----------|----------|-----------|-----------|-----------|
| Si | 0.631772  | 3.486686  | 4.508512 | 0.003164  | 0.037214  | -0.004197 |
| Si | 1.821370  | 10.314915 | 1.858278 | 0.003153  | 0.037291  | -0.003893 |
| Si | -0.333059 | 10.387486 | 5.041673 | 0.003150  | -0.037251 | -0.004205 |
| Si | 2.786201  | 3.414115  | 1.325117 | 0.003167  | -0.037278 | -0.003899 |
| O  | 0.061445  | 3.072947  | 3.041906 | -0.013373 | -0.003934 | 0.009904  |
| O  | 2.391697  | 10.728653 | 3.324884 | -0.013257 | -0.004366 | 0.010282  |
| O  | 4.546126  | 9.973747  | 0.141489 | -0.013368 | 0.003926  | 0.009900  |
| O  | -2.092984 | 3.827853  | 6.225301 | -0.013267 | 0.004392  | 0.010286  |
| O  | 2.197450  | 3.933608  | 4.519003 | 0.016052  | -0.010800 | -0.003781 |
| O  | 0.255692  | 9.867992  | 1.847787 | 0.016033  | -0.010816 | -0.003681 |
| O  | -1.898737 | 10.834409 | 5.031182 | 0.016056  | 0.010811  | -0.003801 |
| O  | 4.351879  | 2.967192  | 1.335608 | 0.016028  | 0.010785  | -0.003660 |
| O  | -0.212316 | 4.798696  | 5.055280 | 0.010707  | 0.021221  | 0.036177  |
| O  | 2.665458  | 9.002905  | 1.311510 | 0.010578  | 0.021243  | 0.036248  |
| O  | 0.511030  | 11.699496 | 4.494905 | 0.010718  | -0.021249 | 0.036220  |
| O  | 1.942113  | 2.102105  | 1.871885 | 0.010575  | -0.021222 | 0.036232  |
| O  | 0.525580  | 2.169271  | 5.472081 | 0.001018  | 0.034971  | -0.002890 |
| O  | 1.927562  | 11.632329 | 0.894709 | 0.000634  | 0.035019  | -0.002741 |
| O  | -0.226867 | 9.070071  | 4.078104 | 0.001006  | -0.034998 | -0.002900 |
| O  | 2.680009  | 4.731529  | 2.288686 | 0.000644  | -0.035024 | -0.002737 |
| O  | 0.058846  | 0.698526  | 2.444964 | 0.001337  | -0.003949 | -0.050086 |
| O  | 2.394296  | 13.103075 | 3.921826 | 0.001128  | -0.003810 | -0.049959 |
| O  | 4.548725  | 7.599326  | 0.738431 | 0.001338  | 0.003972  | -0.050104 |
| O  | -2.095583 | 6.202275  | 5.628359 | 0.001121  | 0.003807  | -0.049944 |
| O  | -2.459230 | 13.184059 | 5.445139 | -0.044744 | 0.001919  | -0.007195 |
| O  | 4.912372  | 0.617542  | 0.921651 | -0.044605 | 0.001812  | -0.006985 |
| O  | 2.757943  | 6.283259  | 4.105046 | -0.044742 | -0.001917 | -0.007208 |
| O  | -0.304801 | 7.518342  | 2.261744 | -0.044595 | -0.001812 | -0.006998 |
| O  | -0.175430 | 2.374756  | 0.744070 | 0.005150  | -0.012229 | -0.001959 |
| O  | 2.628573  | 11.426844 | 5.622720 | 0.005313  | -0.012506 | -0.002062 |
| O  | 4.783002  | 9.275557  | 2.439325 | 0.005155  | 0.012244  | -0.001959 |
| O  | -2.329859 | 4.526044  | 3.927465 | 0.005305  | 0.012510  | -0.002073 |
| O  | -1.223866 | 12.517207 | 2.155216 | 0.033848  | 0.011878  | 0.030546  |
| O  | 3.677009  | 1.284394  | 4.211574 | 0.034018  | 0.012166  | 0.030191  |
| O  | 5.831438  | 5.616407  | 1.028179 | 0.033836  | -0.011861 | 0.030561  |
| O  | -3.378295 | 8.185194  | 5.338611 | 0.034018  | -0.012170 | 0.030184  |

|   |           |           |          |          |           |          |
|---|-----------|-----------|----------|----------|-----------|----------|
| H | -0.637445 | 12.195109 | 2.878812 | 0.071359 | 0.051339  | 0.018453 |
| H | 3.090587  | 1.606491  | 3.487978 | 0.071417 | 0.051722  | 0.018243 |
| H | 5.245016  | 5.294309  | 0.304583 | 0.071388 | -0.051328 | 0.018438 |
| H | -2.791874 | 8.507292  | 6.062207 | 0.071377 | -0.051727 | 0.018267 |

122 f = 10.867470 THz 68.282328 2PiTHz 362.499770 cm-1 44.944260 meV

|    | X         | Y         | Z        | dx        | dy        | dz        |
|----|-----------|-----------|----------|-----------|-----------|-----------|
| Li | 3.769818  | 9.645336  | 4.001386 | 0.024508  | -0.051454 | -0.042148 |
| Li | -1.316675 | 4.156264  | 2.365404 | -0.024394 | 0.051519  | 0.042049  |
| Li | -3.471104 | 2.744536  | 5.548798 | -0.024290 | -0.051284 | 0.042470  |
| Li | 5.924247  | 11.057064 | 0.817991 | 0.024175  | 0.051329  | -0.042372 |
| Na | 2.049025  | 6.784862  | 1.629696 | 0.002380  | -0.029781 | 0.007508  |
| Na | 0.404117  | 7.016739  | 4.737094 | -0.002383 | 0.029669  | -0.007419 |
| Na | 2.558546  | 13.685662 | 1.553699 | -0.002388 | -0.029838 | -0.007459 |
| Na | -0.105403 | 0.115939  | 4.813091 | 0.002383  | 0.029753  | 0.007532  |
| B  | 4.155007  | 8.978944  | 1.168663 | -0.004649 | 0.018126  | 0.006235  |
| B  | -1.701865 | 4.822656  | 5.198127 | 0.004647  | -0.018134 | -0.006276 |
| B  | 0.452564  | 2.078144  | 2.014732 | 0.004622  | 0.018189  | -0.006243 |
| B  | 2.000578  | 11.723457 | 4.352058 | -0.004622 | -0.018174 | 0.006263  |
| B  | -2.733891 | 11.746082 | 5.839177 | 0.007524  | 0.015796  | -0.010145 |
| B  | 5.187034  | 2.055518  | 0.527613 | -0.007562 | -0.015811 | 0.010154  |
| B  | 3.032605  | 4.845282  | 3.711007 | -0.007550 | 0.015743  | 0.010162  |
| B  | -0.579463 | 8.956318  | 2.655782 | 0.007587  | -0.015735 | -0.010150 |
| B  | -0.983708 | 0.054306  | 1.827988 | 0.019783  | 0.000973  | 0.000573  |
| B  | 3.436850  | 13.747295 | 4.538802 | -0.019780 | -0.000954 | -0.000596 |
| B  | 5.591279  | 6.955106  | 1.355407 | -0.019649 | 0.000989  | -0.000447 |
| B  | -3.138137 | 6.846495  | 5.011383 | 0.019639  | -0.000971 | 0.000471  |
| Si | 0.631772  | 3.486686  | 4.508512 | 0.008051  | -0.036360 | -0.007928 |
| Si | 1.821370  | 10.314915 | 1.858278 | -0.008049 | 0.036343  | 0.007923  |
| Si | -0.333059 | 10.387486 | 5.041673 | -0.008046 | -0.036315 | 0.007833  |
| Si | 2.786201  | 3.414115  | 1.325117 | 0.008068  | 0.036329  | -0.007856 |
| O  | 0.061445  | 3.072947  | 3.041906 | -0.005219 | 0.026027  | -0.020989 |
| O  | 2.391697  | 10.728653 | 3.324884 | 0.005250  | -0.026008 | 0.020980  |
| O  | 4.546126  | 9.973747  | 0.141489 | 0.005106  | 0.025801  | 0.020841  |
| O  | -2.092984 | 3.827853  | 6.225301 | -0.005086 | -0.025815 | -0.020868 |

|   |           |           |          |           |           |           |
|---|-----------|-----------|----------|-----------|-----------|-----------|
| O | 2.197450  | 3.933608  | 4.519003 | -0.000502 | 0.011520  | 0.027661  |
| O | 0.255692  | 9.867992  | 1.847787 | 0.000487  | -0.011460 | -0.027608 |
| O | -1.898737 | 10.834409 | 5.031182 | 0.000567  | 0.011641  | -0.027626 |
| O | 4.351879  | 2.967192  | 1.335608 | -0.000557 | -0.011640 | 0.027628  |
| O | -0.212316 | 4.798696  | 5.055280 | -0.004681 | -0.048489 | 0.001449  |
| O | 2.665458  | 9.002905  | 1.311510 | 0.004652  | 0.048468  | -0.001525 |
| O | 0.511030  | 11.699496 | 4.494905 | 0.004758  | -0.048496 | -0.001415 |
| O | 1.942113  | 2.102105  | 1.871885 | -0.004750 | 0.048552  | 0.001476  |
| O | 0.525580  | 2.169271  | 5.472081 | -0.009461 | -0.026296 | 0.001584  |
| O | 1.927562  | 11.632329 | 0.894709 | 0.009407  | 0.026283  | -0.001583 |
| O | -0.226867 | 9.070071  | 4.078104 | 0.009568  | -0.026203 | -0.001671 |
| O | 2.680009  | 4.731529  | 2.288686 | -0.009468 | 0.026208  | 0.001666  |
| O | 0.058846  | 0.698526  | 2.444964 | 0.012941  | 0.004381  | 0.011972  |
| O | 2.394296  | 13.103075 | 3.921826 | -0.012940 | -0.004373 | -0.011985 |
| O | 4.548725  | 7.599326  | 0.738431 | -0.012690 | 0.004461  | -0.011952 |
| O | -2.095583 | 6.202275  | 5.628359 | 0.012691  | -0.004457 | 0.011953  |
| O | -2.459230 | 13.184059 | 5.445139 | -0.022475 | 0.012510  | 0.010481  |
| O | 4.912372  | 0.617542  | 0.921651 | 0.022448  | -0.012521 | -0.010493 |
| O | 2.757943  | 6.283259  | 4.105046 | 0.022377  | 0.012584  | -0.010705 |
| O | -0.304801 | 7.518342  | 2.261744 | -0.022370 | -0.012601 | 0.010742  |
| O | -0.175430 | 2.374756  | 0.744070 | -0.008817 | -0.020866 | -0.004758 |
| O | 2.628573  | 11.426844 | 5.622720 | 0.008770  | 0.020880  | 0.004797  |
| O | 4.783002  | 9.275557  | 2.439325 | 0.008787  | -0.020881 | 0.004765  |
| O | -2.329859 | 4.526044  | 3.927465 | -0.008766 | 0.020883  | -0.004800 |
| O | -1.223866 | 12.517207 | 2.155216 | -0.025074 | 0.001017  | -0.028761 |
| O | 3.677009  | 1.284394  | 4.211574 | 0.025087  | -0.001000 | 0.028728  |
| O | 5.831438  | 5.616407  | 1.028179 | 0.024904  | 0.001039  | 0.028652  |
| O | -3.378295 | 8.185194  | 5.338611 | -0.024964 | -0.001019 | -0.028670 |
| H | -0.637445 | 12.195109 | 2.878812 | -0.078213 | -0.031633 | -0.001633 |
| H | 3.090587  | 1.606491  | 3.487978 | 0.078222  | 0.031654  | 0.001602  |
| H | 5.245016  | 5.294309  | 0.304583 | 0.077930  | -0.031359 | 0.001486  |
| H | -2.791874 | 8.507292  | 6.062207 | -0.078002 | 0.031402  | -0.001505 |

123 f = 10.832638 THz      68.063473 2PiTHz      361.337907 cm-1      44.800207 meV

X                      Y                      Z                      dx                      dy                      dz

|    |           |           |          |           |           |           |
|----|-----------|-----------|----------|-----------|-----------|-----------|
| Li | 3.769818  | 9.645336  | 4.001386 | 0.061650  | 0.000680  | 0.047641  |
| Li | -1.316675 | 4.156264  | 2.365404 | -0.061433 | -0.000534 | -0.047799 |
| Li | -3.471104 | 2.744536  | 5.548798 | 0.061684  | -0.000397 | 0.047504  |
| Li | 5.924247  | 11.057064 | 0.817991 | -0.061633 | 0.000318  | -0.047553 |
| Na | 2.049025  | 6.784862  | 1.629696 | -0.001819 | 0.016810  | -0.007231 |
| Na | 0.404117  | 7.016739  | 4.737094 | 0.001830  | -0.016800 | 0.007272  |
| Na | 2.558546  | 13.685662 | 1.553699 | -0.001825 | -0.016677 | -0.007243 |
| Na | -0.105403 | 0.115939  | 4.813091 | 0.001794  | 0.016641  | 0.007194  |
| B  | 4.155007  | 8.978944  | 1.168663 | -0.001586 | -0.012391 | 0.001985  |
| B  | -1.701865 | 4.822656  | 5.198127 | 0.001563  | 0.012336  | -0.001994 |
| B  | 0.452564  | 2.078144  | 2.014732 | -0.001613 | 0.012287  | 0.002018  |
| B  | 2.000578  | 11.723457 | 4.352058 | 0.001599  | -0.012269 | -0.002011 |
| B  | -2.733891 | 11.746082 | 5.839177 | -0.006431 | 0.012984  | 0.003923  |
| B  | 5.187034  | 2.055518  | 0.527613 | 0.006431  | -0.012981 | -0.003904 |
| B  | 3.032605  | 4.845282  | 3.711007 | -0.006399 | -0.013038 | 0.003884  |
| B  | -0.579463 | 8.956318  | 2.655782 | 0.006406  | 0.013076  | -0.003848 |
| B  | -0.983708 | 0.054306  | 1.827988 | 0.027493  | 0.008599  | 0.022432  |
| B  | 3.436850  | 13.747295 | 4.538802 | -0.027444 | -0.008650 | -0.022376 |
| B  | 5.591279  | 6.955106  | 1.355407 | 0.027617  | -0.008605 | 0.022466  |
| B  | -3.138137 | 6.846495  | 5.011383 | -0.027566 | 0.008665  | -0.022378 |
| Si | 0.631772  | 3.486686  | 4.508512 | -0.002703 | -0.008095 | -0.004825 |
| Si | 1.821370  | 10.314915 | 1.858278 | 0.002708  | 0.007992  | 0.004814  |
| Si | -0.333059 | 10.387486 | 5.041673 | -0.002690 | 0.008272  | -0.004838 |
| Si | 2.786201  | 3.414115  | 1.325117 | 0.002658  | -0.008176 | 0.004897  |
| O  | 0.061445  | 3.072947  | 3.041906 | -0.027135 | 0.029213  | -0.013781 |
| O  | 2.391697  | 10.728653 | 3.324884 | 0.027207  | -0.029190 | 0.013734  |
| O  | 4.546126  | 9.973747  | 0.141489 | -0.027216 | -0.029319 | -0.013853 |
| O  | -2.092984 | 3.827853  | 6.225301 | 0.027210  | 0.029317  | 0.013870  |
| O  | 2.197450  | 3.933608  | 4.519003 | 0.012322  | -0.031469 | 0.008820  |
| O  | 0.255692  | 9.867992  | 1.847787 | -0.012346 | 0.031453  | -0.008864 |
| O  | -1.898737 | 10.834409 | 5.031182 | 0.012306  | 0.031419  | 0.008964  |
| O  | 4.351879  | 2.967192  | 1.335608 | -0.012348 | -0.031396 | -0.008973 |
| O  | -0.212316 | 4.798696  | 5.055280 | 0.014566  | 0.008861  | 0.010427  |
| O  | 2.665458  | 9.002905  | 1.311510 | -0.014618 | -0.008916 | -0.010619 |
| O  | 0.511030  | 11.699496 | 4.494905 | 0.014563  | -0.008651 | 0.010489  |
| O  | 1.942113  | 2.102105  | 1.871885 | -0.014588 | 0.008656  | -0.010572 |

|   |           |           |          |           |           |           |
|---|-----------|-----------|----------|-----------|-----------|-----------|
| O | 0.525580  | 2.169271  | 5.472081 | 0.002718  | -0.021663 | -0.013308 |
| O | 1.927562  | 11.632329 | 0.894709 | -0.002708 | 0.021578  | 0.013301  |
| O | -0.226867 | 9.070071  | 4.078104 | 0.002635  | 0.021812  | -0.013290 |
| O | 2.680009  | 4.731529  | 2.288686 | -0.002639 | -0.021671 | 0.013294  |
| O | 0.058846  | 0.698526  | 2.444964 | 0.045993  | -0.009974 | 0.010808  |
| O | 2.394296  | 13.103075 | 3.921826 | -0.046035 | 0.009990  | -0.010661 |
| O | 4.548725  | 7.599326  | 0.738431 | 0.046084  | 0.009946  | 0.010906  |
| O | -2.095583 | 6.202275  | 5.628359 | -0.046100 | -0.009968 | -0.010756 |
| O | -2.459230 | 13.184059 | 5.445139 | -0.014840 | -0.021179 | -0.046382 |
| O | 4.912372  | 0.617542  | 0.921651 | 0.015008  | 0.021142  | 0.046343  |
| O | 2.757943  | 6.283259  | 4.105046 | -0.015003 | 0.021120  | -0.046305 |
| O | -0.304801 | 7.518342  | 2.261744 | 0.015147  | -0.021087 | 0.046323  |
| O | -0.175430 | 2.374756  | 0.744070 | 0.001139  | -0.003359 | -0.003113 |
| O | 2.628573  | 11.426844 | 5.622720 | -0.001176 | 0.003461  | 0.003156  |
| O | 4.783002  | 9.275557  | 2.439325 | 0.001113  | 0.003470  | -0.003155 |
| O | -2.329859 | 4.526044  | 3.927465 | -0.001142 | -0.003562 | 0.003164  |
| O | -1.223866 | 12.517207 | 2.155216 | -0.024755 | 0.005819  | -0.030051 |
| O | 3.677009  | 1.284394  | 4.211574 | 0.024696  | -0.005886 | 0.030019  |
| O | 5.831438  | 5.616407  | 1.028179 | -0.024902 | -0.005827 | -0.030210 |
| O | -3.378295 | 8.185194  | 5.338611 | 0.024801  | 0.005898  | 0.030163  |
| H | -0.637445 | 12.195109 | 2.878812 | -0.052758 | -0.043765 | -0.032497 |
| H | 3.090587  | 1.606491  | 3.487978 | 0.052620  | 0.043636  | 0.032507  |
| H | 5.245016  | 5.294309  | 0.304583 | -0.053218 | 0.043962  | -0.032503 |
| H | -2.791874 | 8.507292  | 6.062207 | 0.053004  | -0.043781 | 0.032501  |

124 f = 10.699877 THz    67.229309 2PiTHz    356.909461 cm-1    44.251149 meV

|    | X         | Y         | Z        | dx        | dy        | dz        |
|----|-----------|-----------|----------|-----------|-----------|-----------|
| Li | 3.769818  | 9.645336  | 4.001386 | -0.095819 | -0.052999 | 0.043573  |
| Li | -1.316675 | 4.156264  | 2.365404 | -0.095989 | -0.053052 | 0.043663  |
| Li | -3.471104 | 2.744536  | 5.548798 | 0.095908  | -0.053142 | -0.043626 |
| Li | 5.924247  | 11.057064 | 0.817991 | 0.095866  | -0.052952 | -0.043649 |
| Na | 2.049025  | 6.784862  | 1.629696 | 0.003949  | 0.005527  | 0.001936  |
| Na | 0.404117  | 7.016739  | 4.737094 | 0.003967  | 0.005549  | 0.001908  |
| Na | 2.558546  | 13.685662 | 1.553699 | -0.003963 | 0.005559  | -0.001902 |
| Na | -0.105403 | 0.115939  | 4.813091 | -0.003942 | 0.005522  | -0.001932 |

|    |           |           |          |           |           |           |
|----|-----------|-----------|----------|-----------|-----------|-----------|
| B  | 4.155007  | 8.978944  | 1.168663 | 0.001180  | 0.008484  | 0.008126  |
| B  | -1.701865 | 4.822656  | 5.198127 | 0.001178  | 0.008470  | 0.008142  |
| B  | 0.452564  | 2.078144  | 2.014732 | -0.001166 | 0.008483  | -0.008146 |
| B  | 2.000578  | 11.723457 | 4.352058 | -0.001191 | 0.008493  | -0.008146 |
| B  | -2.733891 | 11.746082 | 5.839177 | 0.007906  | 0.004185  | 0.004689  |
| B  | 5.187034  | 2.055518  | 0.527613 | 0.007899  | 0.004197  | 0.004706  |
| B  | 3.032605  | 4.845282  | 3.711007 | -0.007913 | 0.004226  | -0.004684 |
| B  | -0.579463 | 8.956318  | 2.655782 | -0.007913 | 0.004189  | -0.004683 |
| B  | -0.983708 | 0.054306  | 1.827988 | 0.012887  | 0.002023  | 0.022883  |
| B  | 3.436850  | 13.747295 | 4.538802 | 0.012844  | 0.001993  | 0.022885  |
| B  | 5.591279  | 6.955106  | 1.355407 | -0.012903 | 0.002007  | -0.022889 |
| B  | -3.138137 | 6.846495  | 5.011383 | -0.012850 | 0.002032  | -0.022885 |
| Si | 0.631772  | 3.486686  | 4.508512 | 0.019468  | -0.008101 | -0.012122 |
| Si | 1.821370  | 10.314915 | 1.858278 | 0.019413  | -0.008069 | -0.012051 |
| Si | -0.333059 | 10.387486 | 5.041673 | -0.019405 | -0.008077 | 0.012078  |
| Si | 2.786201  | 3.414115  | 1.325117 | -0.019465 | -0.008080 | 0.012105  |
| O  | 0.061445  | 3.072947  | 3.041906 | 0.003324  | 0.022472  | -0.018750 |
| O  | 2.391697  | 10.728653 | 3.324884 | 0.003280  | 0.022403  | -0.018654 |
| O  | 4.546126  | 9.973747  | 0.141489 | -0.003239 | 0.022394  | 0.018665  |
| O  | -2.092984 | 3.827853  | 6.225301 | -0.003305 | 0.022392  | 0.018692  |
| O  | 2.197450  | 3.933608  | 4.519003 | 0.026978  | -0.029087 | -0.010908 |
| O  | 0.255692  | 9.867992  | 1.847787 | 0.026919  | -0.029043 | -0.010873 |
| O  | -1.898737 | 10.834409 | 5.031182 | -0.026929 | -0.029076 | 0.010885  |
| O  | 4.351879  | 2.967192  | 1.335608 | -0.026990 | -0.029144 | 0.010969  |
| O  | -0.212316 | 4.798696  | 5.055280 | 0.007263  | -0.009371 | -0.009770 |
| O  | 2.665458  | 9.002905  | 1.311510 | 0.007276  | -0.009292 | -0.009694 |
| O  | 0.511030  | 11.699496 | 4.494905 | -0.007285 | -0.009297 | 0.009702  |
| O  | 1.942113  | 2.102105  | 1.871885 | -0.007265 | -0.009329 | 0.009790  |
| O  | 0.525580  | 2.169271  | 5.472081 | 0.003451  | -0.003945 | -0.002450 |
| O  | 1.927562  | 11.632329 | 0.894709 | 0.003457  | -0.003970 | -0.002454 |
| O  | -0.226867 | 9.070071  | 4.078104 | -0.003398 | -0.003947 | 0.002444  |
| O  | 2.680009  | 4.731529  | 2.288686 | -0.003447 | -0.003923 | 0.002445  |
| O  | 0.058846  | 0.698526  | 2.444964 | 0.029000  | -0.003909 | 0.005574  |
| O  | 2.394296  | 13.103075 | 3.921826 | 0.028930  | -0.003883 | 0.005555  |
| O  | 4.548725  | 7.599326  | 0.738431 | -0.028964 | -0.003890 | -0.005632 |
| O  | -2.095583 | 6.202275  | 5.628359 | -0.028939 | -0.003875 | -0.005578 |



|   |           |           |          |           |           |           |
|---|-----------|-----------|----------|-----------|-----------|-----------|
| O | -2.459230 | 13.184059 | 5.445139 | 0.014116  | 0.026602  | 0.042291  |
| O | 4.912372  | 0.617542  | 0.921651 | 0.014142  | 0.026622  | 0.042318  |
| O | 2.757943  | 6.283259  | 4.105046 | -0.014135 | 0.026639  | -0.042299 |
| O | -0.304801 | 7.518342  | 2.261744 | -0.014199 | 0.026587  | -0.042253 |
| O | -0.175430 | 2.374756  | 0.744070 | 0.009063  | 0.018099  | -0.012360 |
| O | 2.628573  | 11.426844 | 5.622720 | 0.009052  | 0.018138  | -0.012361 |
| O | 4.783002  | 9.275557  | 2.439325 | -0.009067 | 0.018079  | 0.012356  |
| O | -2.329859 | 4.526044  | 3.927465 | -0.009075 | 0.018157  | 0.012359  |
| O | -1.223866 | 12.517207 | 2.155216 | -0.023681 | 0.000596  | -0.007469 |
| O | 3.677009  | 1.284394  | 4.211574 | -0.023683 | 0.000572  | -0.007404 |
| O | 5.831438  | 5.616407  | 1.028179 | 0.023679  | 0.000588  | 0.007441  |
| O | -3.378295 | 8.185194  | 5.338611 | 0.023643  | 0.000605  | 0.007416  |
| H | -0.637445 | 12.195109 | 2.878812 | -0.048829 | -0.030828 | -0.002357 |
| H | 3.090587  | 1.606491  | 3.487978 | -0.048783 | -0.030819 | -0.002317 |
| H | 5.245016  | 5.294309  | 0.304583 | 0.048863  | -0.030834 | 0.002301  |
| H | -2.791874 | 8.507292  | 6.062207 | 0.048735  | -0.030766 | 0.002324  |

125 f = 10.549493 THz    66.284418 2PiTHz    351.893189 cm-1    43.629211 meV

|    | X         | Y         | Z        | dx        | dy        | dz        |
|----|-----------|-----------|----------|-----------|-----------|-----------|
| Li | 3.769818  | 9.645336  | 4.001386 | -0.071418 | -0.011373 | -0.000317 |
| Li | -1.316675 | 4.156264  | 2.365404 | 0.071283  | 0.011198  | 0.000299  |
| Li | -3.471104 | 2.744536  | 5.548798 | 0.071414  | -0.011489 | 0.000275  |
| Li | 5.924247  | 11.057064 | 0.817991 | -0.071399 | 0.011339  | -0.000220 |
| Na | 2.049025  | 6.784862  | 1.629696 | 0.002075  | -0.016418 | 0.002725  |
| Na | 0.404117  | 7.016739  | 4.737094 | -0.002070 | 0.016320  | -0.002645 |
| Na | 2.558546  | 13.685662 | 1.553699 | -0.002074 | -0.016360 | -0.002645 |
| Na | -0.105403 | 0.115939  | 4.813091 | 0.002068  | 0.016296  | 0.002698  |
| B  | 4.155007  | 8.978944  | 1.168663 | 0.014794  | 0.007165  | 0.004239  |
| B  | -1.701865 | 4.822656  | 5.198127 | -0.014799 | -0.007143 | -0.004275 |
| B  | 0.452564  | 2.078144  | 2.014732 | -0.014759 | 0.007131  | -0.004244 |
| B  | 2.000578  | 11.723457 | 4.352058 | 0.014766  | -0.007129 | 0.004284  |
| B  | -2.733891 | 11.746082 | 5.839177 | 0.000603  | 0.004558  | 0.005211  |
| B  | 5.187034  | 2.055518  | 0.527613 | -0.000633 | -0.004575 | -0.005201 |
| B  | 3.032605  | 4.845282  | 3.711007 | -0.000596 | 0.004591  | -0.005199 |
| B  | -0.579463 | 8.956318  | 2.655782 | 0.000635  | -0.004605 | 0.005242  |

|    |           |           |          |           |           |           |
|----|-----------|-----------|----------|-----------|-----------|-----------|
| B  | -0.983708 | 0.054306  | 1.827988 | -0.017141 | -0.002584 | -0.004073 |
| B  | 3.436850  | 13.747295 | 4.538802 | 0.017188  | 0.002559  | 0.004100  |
| B  | 5.591279  | 6.955106  | 1.355407 | 0.017162  | -0.002606 | 0.004070  |
| B  | -3.138137 | 6.846495  | 5.011383 | -0.017178 | 0.002615  | -0.004080 |
| Si | 0.631772  | 3.486686  | 4.508512 | 0.013581  | -0.025118 | 0.012360  |
| Si | 1.821370  | 10.314915 | 1.858278 | -0.013572 | 0.025167  | -0.012355 |
| Si | -0.333059 | 10.387486 | 5.041673 | -0.013538 | -0.025117 | -0.012430 |
| Si | 2.786201  | 3.414115  | 1.325117 | 0.013509  | 0.025161  | 0.012397  |
| O  | 0.061445  | 3.072947  | 3.041906 | -0.005868 | -0.040461 | 0.028593  |
| O  | 2.391697  | 10.728653 | 3.324884 | 0.005910  | 0.040517  | -0.028607 |
| O  | 4.546126  | 9.973747  | 0.141489 | 0.005961  | -0.040488 | -0.028675 |
| O  | -2.092984 | 3.827853  | 6.225301 | -0.005952 | 0.040493  | 0.028632  |
| O  | 2.197450  | 3.933608  | 4.519003 | 0.011397  | -0.019929 | -0.012645 |
| O  | 0.255692  | 9.867992  | 1.847787 | -0.011378 | 0.019960  | 0.012740  |
| O  | -1.898737 | 10.834409 | 5.031182 | -0.011360 | -0.019895 | 0.012586  |
| O  | 4.351879  | 2.967192  | 1.335608 | 0.011305  | 0.019890  | -0.012658 |
| O  | -0.212316 | 4.798696  | 5.055280 | -0.011418 | -0.017389 | -0.032136 |
| O  | 2.665458  | 9.002905  | 1.311510 | 0.011402  | 0.017478  | 0.031998  |
| O  | 0.511030  | 11.699496 | 4.494905 | 0.011372  | -0.017347 | 0.032012  |
| O  | 1.942113  | 2.102105  | 1.871885 | -0.011372 | 0.017414  | -0.031958 |
| O  | 0.525580  | 2.169271  | 5.472081 | 0.005816  | -0.026097 | 0.000520  |
| O  | 1.927562  | 11.632329 | 0.894709 | -0.005897 | 0.026124  | -0.000521 |
| O  | -0.226867 | 9.070071  | 4.078104 | -0.005728 | -0.026142 | -0.000509 |
| O  | 2.680009  | 4.731529  | 2.288686 | 0.005909  | 0.026162  | 0.000516  |
| O  | 0.058846  | 0.698526  | 2.444964 | -0.048500 | 0.024360  | 0.012993  |
| O  | 2.394296  | 13.103075 | 3.921826 | 0.048592  | -0.024423 | -0.012979 |
| O  | 4.548725  | 7.599326  | 0.738431 | 0.048556  | 0.024392  | -0.013000 |
| O  | -2.095583 | 6.202275  | 5.628359 | -0.048580 | -0.024388 | 0.012988  |
| O  | -2.459230 | 13.184059 | 5.445139 | 0.000880  | 0.020679  | 0.031253  |
| O  | 4.912372  | 0.617542  | 0.921651 | -0.000860 | -0.020659 | -0.031182 |
| O  | 2.757943  | 6.283259  | 4.105046 | -0.000856 | 0.020696  | -0.031233 |
| O  | -0.304801 | 7.518342  | 2.261744 | 0.000847  | -0.020707 | 0.031234  |
| O  | -0.175430 | 2.374756  | 0.744070 | -0.009217 | 0.018613  | -0.003051 |
| O  | 2.628573  | 11.426844 | 5.622720 | 0.009183  | -0.018621 | 0.003097  |
| O  | 4.783002  | 9.275557  | 2.439325 | 0.009224  | 0.018610  | 0.003079  |
| O  | -2.329859 | 4.526044  | 3.927465 | -0.009221 | -0.018645 | -0.003065 |

|   |           |           |          |           |           |           |
|---|-----------|-----------|----------|-----------|-----------|-----------|
| O | -1.223866 | 12.517207 | 2.155216 | 0.015664  | -0.004923 | 0.011289  |
| O | 3.677009  | 1.284394  | 4.211574 | -0.015715 | 0.004899  | -0.011324 |
| O | 5.831438  | 5.616407  | 1.028179 | -0.015644 | -0.004944 | -0.011339 |
| O | -3.378295 | 8.185194  | 5.338611 | 0.015658  | 0.004958  | 0.011307  |
| H | -0.637445 | 12.195109 | 2.878812 | 0.032463  | 0.009790  | 0.004150  |
| H | 3.090587  | 1.606491  | 3.487978 | -0.032568 | -0.009865 | -0.004168 |
| H | 5.245016  | 5.294309  | 0.304583 | -0.032457 | 0.009778  | -0.004189 |
| H | -2.791874 | 8.507292  | 6.062207 | 0.032472  | -0.009780 | 0.004168  |

126 f = 10.501030 THz    65.979918 2PiTHz    350.276651 cm-1    43.428785 meV

|    | X         | Y         | Z        | dx        | dy        | dz        |
|----|-----------|-----------|----------|-----------|-----------|-----------|
| Li | 3.769818  | 9.645336  | 4.001386 | 0.019349  | 0.037212  | -0.019978 |
| Li | -1.316675 | 4.156264  | 2.365404 | -0.019234 | -0.037089 | 0.019804  |
| Li | -3.471104 | 2.744536  | 5.548798 | 0.019083  | -0.037127 | -0.019912 |
| Li | 5.924247  | 11.057064 | 0.817991 | -0.019246 | 0.037087  | 0.019903  |
| Na | 2.049025  | 6.784862  | 1.629696 | 0.000855  | -0.020589 | 0.006685  |
| Na | 0.404117  | 7.016739  | 4.737094 | -0.000864 | 0.020477  | -0.006603 |
| Na | 2.558546  | 13.685662 | 1.553699 | 0.000868  | 0.020578  | 0.006603  |
| Na | -0.105403 | 0.115939  | 4.813091 | -0.000861 | -0.020541 | -0.006681 |
| B  | 4.155007  | 8.978944  | 1.168663 | 0.011041  | 0.011885  | -0.003949 |
| B  | -1.701865 | 4.822656  | 5.198127 | -0.011030 | -0.011876 | 0.003910  |
| B  | 0.452564  | 2.078144  | 2.014732 | 0.011057  | -0.011883 | -0.003915 |
| B  | 2.000578  | 11.723457 | 4.352058 | -0.011066 | 0.011892  | 0.003942  |
| B  | -2.733891 | 11.746082 | 5.839177 | 0.002719  | -0.017252 | -0.011273 |
| B  | 5.187034  | 2.055518  | 0.527613 | -0.002720 | 0.017232  | 0.011265  |
| B  | 3.032605  | 4.845282  | 3.711007 | 0.002721  | 0.017221  | -0.011240 |
| B  | -0.579463 | 8.956318  | 2.655782 | -0.002699 | -0.017268 | 0.011281  |
| B  | -0.983708 | 0.054306  | 1.827988 | 0.001736  | 0.014660  | -0.002220 |
| B  | 3.436850  | 13.747295 | 4.538802 | -0.001742 | -0.014690 | 0.002209  |
| B  | 5.591279  | 6.955106  | 1.355407 | 0.001734  | -0.014674 | -0.002180 |
| B  | -3.138137 | 6.846495  | 5.011383 | -0.001711 | 0.014676  | 0.002239  |
| Si | 0.631772  | 3.486686  | 4.508512 | 0.028228  | -0.007757 | -0.033108 |
| Si | 1.821370  | 10.314915 | 1.858278 | -0.028290 | 0.007829  | 0.033134  |
| Si | -0.333059 | 10.387486 | 5.041673 | 0.028299  | 0.007846  | -0.033156 |
| Si | 2.786201  | 3.414115  | 1.325117 | -0.028260 | -0.007854 | 0.033072  |

|   |           |           |          |           |           |           |
|---|-----------|-----------|----------|-----------|-----------|-----------|
| O | 0.061445  | 3.072947  | 3.041906 | 0.029817  | 0.006481  | -0.032243 |
| O | 2.391697  | 10.728653 | 3.324884 | -0.029854 | -0.006471 | 0.032277  |
| O | 4.546126  | 9.973747  | 0.141489 | 0.029801  | -0.006411 | -0.032257 |
| O | -2.092984 | 3.827853  | 6.225301 | -0.029797 | 0.006344  | 0.032157  |
| O | 2.197450  | 3.933608  | 4.519003 | 0.027819  | -0.024966 | -0.040223 |
| O | 0.255692  | 9.867992  | 1.847787 | -0.027892 | 0.025072  | 0.040320  |
| O | -1.898737 | 10.834409 | 5.031182 | 0.027898  | 0.025079  | -0.040313 |
| O | 4.351879  | 2.967192  | 1.335608 | -0.027857 | -0.025069 | 0.040286  |
| O | -0.212316 | 4.798696  | 5.055280 | -0.013491 | -0.031230 | -0.040894 |
| O | 2.665458  | 9.002905  | 1.311510 | 0.013472  | 0.031316  | 0.040890  |
| O | 0.511030  | 11.699496 | 4.494905 | -0.013513 | 0.031346  | -0.040969 |
| O | 1.942113  | 2.102105  | 1.871885 | 0.013500  | -0.031273 | 0.040989  |
| O | 0.525580  | 2.169271  | 5.472081 | 0.021838  | 0.018002  | 0.003272  |
| O | 1.927562  | 11.632329 | 0.894709 | -0.021850 | -0.017954 | -0.003268 |
| O | -0.226867 | 9.070071  | 4.078104 | 0.021879  | -0.017971 | 0.003282  |
| O | 2.680009  | 4.731529  | 2.288686 | -0.021808 | 0.017911  | -0.003277 |
| O | 0.058846  | 0.698526  | 2.444964 | 0.011657  | -0.001799 | -0.005054 |
| O | 2.394296  | 13.103075 | 3.921826 | -0.011662 | 0.001788  | 0.005039  |
| O | 4.548725  | 7.599326  | 0.738431 | 0.011615  | 0.001767  | -0.004975 |
| O | -2.095583 | 6.202275  | 5.628359 | -0.011517 | -0.001728 | 0.004971  |
| O | -2.459230 | 13.184059 | 5.445139 | 0.006637  | -0.018423 | -0.012854 |
| O | 4.912372  | 0.617542  | 0.921651 | -0.006677 | 0.018385  | 0.012843  |
| O | 2.757943  | 6.283259  | 4.105046 | 0.006625  | 0.018325  | -0.012711 |
| O | -0.304801 | 7.518342  | 2.261744 | -0.006600 | -0.018418 | 0.012841  |
| O | -0.175430 | 2.374756  | 0.744070 | 0.006795  | 0.004331  | 0.001532  |
| O | 2.628573  | 11.426844 | 5.622720 | -0.006795 | -0.004376 | -0.001518 |
| O | 4.783002  | 9.275557  | 2.439325 | 0.006800  | -0.004406 | 0.001510  |
| O | -2.329859 | 4.526044  | 3.927465 | -0.006773 | 0.004358  | -0.001541 |
| O | -1.223866 | 12.517207 | 2.155216 | 0.014710  | 0.015224  | -0.004023 |
| O | 3.677009  | 1.284394  | 4.211574 | -0.014689 | -0.015244 | 0.004057  |
| O | 5.831438  | 5.616407  | 1.028179 | 0.014676  | -0.015232 | -0.004035 |
| O | -3.378295 | 8.185194  | 5.338611 | -0.014751 | 0.015226  | 0.004029  |
| H | -0.637445 | 12.195109 | 2.878812 | 0.023960  | 0.019184  | -0.008553 |
| H | 3.090587  | 1.606491  | 3.487978 | -0.023859 | -0.019201 | 0.008524  |
| H | 5.245016  | 5.294309  | 0.304583 | 0.023868  | -0.019153 | -0.008536 |
| H | -2.791874 | 8.507292  | 6.062207 | -0.023967 | 0.019229  | 0.008514  |

127 f = 10.396500 THz 65.323135 2PiTHz 346.789898 cm-1 42.996483  
meV

|    | X         | Y         | Z        | dx        | dy        | dz        |
|----|-----------|-----------|----------|-----------|-----------|-----------|
| Li | 3.769818  | 9.645336  | 4.001386 | 0.054453  | 0.014155  | 0.027135  |
| Li | -1.316675 | 4.156264  | 2.365404 | 0.054566  | 0.014199  | 0.027183  |
| Li | -3.471104 | 2.744536  | 5.548798 | 0.054478  | -0.014128 | 0.027173  |
| Li | 5.924247  | 11.057064 | 0.817991 | 0.054518  | -0.014082 | 0.027136  |
| Na | 2.049025  | 6.784862  | 1.629696 | -0.000634 | 0.001187  | -0.000560 |
| Na | 0.404117  | 7.016739  | 4.737094 | -0.000639 | 0.001225  | -0.000556 |
| Na | 2.558546  | 13.685662 | 1.553699 | -0.000644 | -0.001194 | -0.000550 |
| Na | -0.105403 | 0.115939  | 4.813091 | -0.000650 | -0.001216 | -0.000576 |
| B  | 4.155007  | 8.978944  | 1.168663 | -0.012596 | 0.004092  | 0.006145  |
| B  | -1.701865 | 4.822656  | 5.198127 | -0.012622 | 0.004066  | 0.006153  |
| B  | 0.452564  | 2.078144  | 2.014732 | -0.012590 | -0.004117 | 0.006118  |
| B  | 2.000578  | 11.723457 | 4.352058 | -0.012593 | -0.004092 | 0.006109  |
| B  | -2.733891 | 11.746082 | 5.839177 | 0.006093  | 0.005531  | -0.013044 |
| B  | 5.187034  | 2.055518  | 0.527613 | 0.006077  | 0.005559  | -0.013036 |
| B  | 3.032605  | 4.845282  | 3.711007 | 0.006095  | -0.005483 | -0.013069 |
| B  | -0.579463 | 8.956318  | 2.655782 | 0.006062  | -0.005509 | -0.013059 |
| B  | -0.983708 | 0.054306  | 1.827988 | -0.007951 | -0.004748 | -0.005127 |
| B  | 3.436850  | 13.747295 | 4.538802 | -0.007952 | -0.004728 | -0.005113 |
| B  | 5.591279  | 6.955106  | 1.355407 | -0.007966 | 0.004756  | -0.005123 |
| B  | -3.138137 | 6.846495  | 5.011383 | -0.007921 | 0.004755  | -0.005100 |
| Si | 0.631772  | 3.486686  | 4.508512 | 0.005624  | -0.010029 | 0.005096  |
| Si | 1.821370  | 10.314915 | 1.858278 | 0.005586  | -0.010014 | 0.005136  |
| Si | -0.333059 | 10.387486 | 5.041673 | 0.005566  | 0.009955  | 0.005196  |
| Si | 2.786201  | 3.414115  | 1.325117 | 0.005535  | 0.010011  | 0.005242  |
| O  | 0.061445  | 3.072947  | 3.041906 | -0.021814 | -0.043845 | 0.028168  |
| O  | 2.391697  | 10.728653 | 3.324884 | -0.021847 | -0.043807 | 0.028187  |
| O  | 4.546126  | 9.973747  | 0.141489 | -0.021827 | 0.043833  | 0.028250  |
| O  | -2.092984 | 3.827853  | 6.225301 | -0.021917 | 0.043859  | 0.028299  |
| O  | 2.197450  | 3.933608  | 4.519003 | 0.018860  | -0.044656 | -0.027631 |
| O  | 0.255692  | 9.867992  | 1.847787 | 0.018818  | -0.044617 | -0.027580 |
| O  | -1.898737 | 10.834409 | 5.031182 | 0.018799  | 0.044563  | -0.027503 |
| O  | 4.351879  | 2.967192  | 1.335608 | 0.018787  | 0.044616  | -0.027487 |

|   |           |           |          |           |           |           |
|---|-----------|-----------|----------|-----------|-----------|-----------|
| O | -0.212316 | 4.798696  | 5.055280 | -0.003312 | -0.000891 | -0.017464 |
| O | 2.665458  | 9.002905  | 1.311510 | -0.003275 | -0.000857 | -0.017350 |
| O | 0.511030  | 11.699496 | 4.494905 | -0.003281 | 0.000784  | -0.017357 |
| O | 1.942113  | 2.102105  | 1.871885 | -0.003262 | 0.000767  | -0.017338 |
| O | 0.525580  | 2.169271  | 5.472081 | -0.019217 | -0.002709 | 0.003717  |
| O | 1.927562  | 11.632329 | 0.894709 | -0.019215 | -0.002736 | 0.003707  |
| O | -0.226867 | 9.070071  | 4.078104 | -0.019297 | 0.002718  | 0.003716  |
| O | 2.680009  | 4.731529  | 2.288686 | -0.019362 | 0.002781  | 0.003727  |
| O | 0.058846  | 0.698526  | 2.444964 | -0.041339 | 0.017018  | 0.022011  |
| O | 2.394296  | 13.103075 | 3.921826 | -0.041318 | 0.017033  | 0.021990  |
| O | 4.548725  | 7.599326  | 0.738431 | -0.041337 | -0.017011 | 0.022003  |
| O | -2.095583 | 6.202275  | 5.628359 | -0.041349 | -0.017037 | 0.022087  |
| O | -2.459230 | 13.184059 | 5.445139 | 0.021849  | -0.017024 | -0.044332 |
| O | 4.912372  | 0.617542  | 0.921651 | 0.021882  | -0.017052 | -0.044391 |
| O | 2.757943  | 6.283259  | 4.105046 | 0.021927  | 0.017071  | -0.044385 |
| O | -0.304801 | 7.518342  | 2.261744 | 0.021830  | 0.017073  | -0.044376 |
| O | -0.175430 | 2.374756  | 0.744070 | 0.002728  | 0.005804  | -0.001380 |
| O | 2.628573  | 11.426844 | 5.622720 | 0.002738  | 0.005816  | -0.001404 |
| O | 4.783002  | 9.275557  | 2.439325 | 0.002716  | -0.005756 | -0.001382 |
| O | -2.329859 | 4.526044  | 3.927465 | 0.002725  | -0.005756 | -0.001394 |
| O | -1.223866 | 12.517207 | 2.155216 | 0.017623  | -0.003170 | 0.022340  |
| O | 3.677009  | 1.284394  | 4.211574 | 0.017606  | -0.003159 | 0.022293  |
| O | 5.831438  | 5.616407  | 1.028179 | 0.017596  | 0.003179  | 0.022322  |
| O | -3.378295 | 8.185194  | 5.338611 | 0.017567  | 0.003183  | 0.022263  |
| H | -0.637445 | 12.195109 | 2.878812 | 0.017445  | 0.029588  | 0.038330  |
| H | 3.090587  | 1.606491  | 3.487978 | 0.017394  | 0.029586  | 0.038300  |
| H | 5.245016  | 5.294309  | 0.304583 | 0.017409  | -0.029592 | 0.038326  |
| H | -2.791874 | 8.507292  | 6.062207 | 0.017298  | -0.029524 | 0.038297  |

128 f = 10.359792 THz      65.092492 2PiTHz      345.565452 cm-1      42.844671 meV

|    | X         | Y         | Z        | dx        | dy       | dz        |
|----|-----------|-----------|----------|-----------|----------|-----------|
| Li | 3.769818  | 9.645336  | 4.001386 | 0.036751  | 0.036536 | -0.017823 |
| Li | -1.316675 | 4.156264  | 2.365404 | 0.036800  | 0.036451 | -0.017700 |
| Li | -3.471104 | 2.744536  | 5.548798 | -0.036862 | 0.036472 | 0.017634  |
| Li | 5.924247  | 11.057064 | 0.817991 | -0.036950 | 0.036591 | 0.017776  |

|    |           |           |          |           |           |           |
|----|-----------|-----------|----------|-----------|-----------|-----------|
| Na | 2.049025  | 6.784862  | 1.629696 | 0.004107  | -0.006756 | 0.003721  |
| Na | 0.404117  | 7.016739  | 4.737094 | 0.004128  | -0.006695 | 0.003715  |
| Na | 2.558546  | 13.685662 | 1.553699 | -0.004128 | -0.006727 | -0.003717 |
| Na | -0.105403 | 0.115939  | 4.813091 | -0.004105 | -0.006710 | -0.003715 |
| B  | 4.155007  | 8.978944  | 1.168663 | -0.007467 | -0.017316 | 0.006835  |
| B  | -1.701865 | 4.822656  | 5.198127 | -0.007495 | -0.017334 | 0.006845  |
| B  | 0.452564  | 2.078144  | 2.014732 | 0.007509  | -0.017323 | -0.006859 |
| B  | 2.000578  | 11.723457 | 4.352058 | 0.007511  | -0.017310 | -0.006843 |
| B  | -2.733891 | 11.746082 | 5.839177 | -0.004438 | 0.020517  | 0.010218  |
| B  | 5.187034  | 2.055518  | 0.527613 | -0.004430 | 0.020536  | 0.010230  |
| B  | 3.032605  | 4.845282  | 3.711007 | 0.004416  | 0.020545  | -0.010205 |
| B  | -0.579463 | 8.956318  | 2.655782 | 0.004420  | 0.020533  | -0.010185 |
| B  | -0.983708 | 0.054306  | 1.827988 | -0.008133 | 0.003690  | -0.011958 |
| B  | 3.436850  | 13.747295 | 4.538802 | -0.008076 | 0.003648  | -0.011920 |
| B  | 5.591279  | 6.955106  | 1.355407 | 0.008127  | 0.003639  | 0.011945  |
| B  | -3.138137 | 6.846495  | 5.011383 | 0.008131  | 0.003686  | 0.011959  |
| Si | 0.631772  | 3.486686  | 4.508512 | 0.020992  | -0.007220 | -0.041741 |
| Si | 1.821370  | 10.314915 | 1.858278 | 0.020965  | -0.007180 | -0.041758 |
| Si | -0.333059 | 10.387486 | 5.041673 | -0.020993 | -0.007215 | 0.041741  |
| Si | 2.786201  | 3.414115  | 1.325117 | -0.020996 | -0.007242 | 0.041740  |
| O  | 0.061445  | 3.072947  | 3.041906 | 0.021168  | 0.004249  | -0.036382 |
| O  | 2.391697  | 10.728653 | 3.324884 | 0.021152  | 0.004346  | -0.036434 |
| O  | 4.546126  | 9.973747  | 0.141489 | -0.021085 | 0.004203  | 0.036340  |
| O  | -2.092984 | 3.827853  | 6.225301 | -0.021117 | 0.004180  | 0.036343  |
| O  | 2.197450  | 3.933608  | 4.519003 | 0.014080  | -0.006058 | -0.042291 |
| O  | 0.255692  | 9.867992  | 1.847787 | 0.014070  | -0.006032 | -0.042227 |
| O  | -1.898737 | 10.834409 | 5.031182 | -0.014129 | -0.006148 | 0.042286  |
| O  | 4.351879  | 2.967192  | 1.335608 | -0.014111 | -0.006133 | 0.042333  |
| O  | -0.212316 | 4.798696  | 5.055280 | -0.013021 | -0.034202 | -0.032556 |
| O  | 2.665458  | 9.002905  | 1.311510 | -0.012988 | -0.034152 | -0.032517 |
| O  | 0.511030  | 11.699496 | 4.494905 | 0.013005  | -0.034170 | 0.032569  |
| O  | 1.942113  | 2.102105  | 1.871885 | 0.013019  | -0.034209 | 0.032572  |
| O  | 0.525580  | 2.169271  | 5.472081 | 0.038173  | 0.022433  | -0.000793 |
| O  | 1.927562  | 11.632329 | 0.894709 | 0.038155  | 0.022437  | -0.000831 |
| O  | -0.226867 | 9.070071  | 4.078104 | -0.038125 | 0.022426  | 0.000817  |
| O  | 2.680009  | 4.731529  | 2.288686 | -0.038120 | 0.022432  | 0.000785  |

|   |           |           |          |           |           |           |
|---|-----------|-----------|----------|-----------|-----------|-----------|
| O | 0.058846  | 0.698526  | 2.444964 | -0.003093 | -0.004415 | -0.016281 |
| O | 2.394296  | 13.103075 | 3.921826 | -0.002991 | -0.004480 | -0.016271 |
| O | 4.548725  | 7.599326  | 0.738431 | 0.003142  | -0.004418 | 0.016226  |
| O | -2.095583 | 6.202275  | 5.628359 | 0.003147  | -0.004390 | 0.016226  |
| O | -2.459230 | 13.184059 | 5.445139 | -0.010172 | 0.004910  | -0.007603 |
| O | 4.912372  | 0.617542  | 0.921651 | -0.010226 | 0.004906  | -0.007664 |
| O | 2.757943  | 6.283259  | 4.105046 | 0.010168  | 0.004885  | 0.007736  |
| O | -0.304801 | 7.518342  | 2.261744 | 0.010144  | 0.004855  | 0.007739  |
| O | -0.175430 | 2.374756  | 0.744070 | -0.000117 | 0.009456  | 0.007357  |
| O | 2.628573  | 11.426844 | 5.622720 | -0.000136 | 0.009430  | 0.007378  |
| O | 4.783002  | 9.275557  | 2.439325 | 0.000127  | 0.009446  | -0.007361 |
| O | -2.329859 | 4.526044  | 3.927465 | 0.000103  | 0.009453  | -0.007354 |
| O | -1.223866 | 12.517207 | 2.155216 | 0.019535  | 0.004075  | 0.012297  |
| O | 3.677009  | 1.284394  | 4.211574 | 0.019454  | 0.004035  | 0.012282  |
| O | 5.831438  | 5.616407  | 1.028179 | -0.019512 | 0.004028  | -0.012353 |
| O | -3.378295 | 8.185194  | 5.338611 | -0.019556 | 0.004075  | -0.012327 |
| H | -0.637445 | 12.195109 | 2.878812 | 0.043605  | 0.020695  | 0.000664  |
| H | 3.090587  | 1.606491  | 3.487978 | 0.043475  | 0.020567  | 0.000646  |
| H | 5.245016  | 5.294309  | 0.304583 | -0.043577 | 0.020667  | -0.000732 |
| H | -2.791874 | 8.507292  | 6.062207 | -0.043596 | 0.020743  | -0.000741 |

129 f = 10.246088 THz      64.378070 2PiTHz      341.772698 cm-1      42.374429 meV

|    | X         | Y         | Z        | dx        | dy        | dz        |
|----|-----------|-----------|----------|-----------|-----------|-----------|
| Li | 3.769818  | 9.645336  | 4.001386 | 0.010850  | -0.003883 | -0.016758 |
| Li | -1.316675 | 4.156264  | 2.365404 | -0.011033 | 0.004050  | 0.016934  |
| Li | -3.471104 | 2.744536  | 5.548798 | -0.010994 | -0.003704 | 0.016695  |
| Li | 5.924247  | 11.057064 | 0.817991 | 0.010764  | 0.004164  | -0.016863 |
| Na | 2.049025  | 6.784862  | 1.629696 | 0.002905  | 0.013356  | -0.011210 |
| Na | 0.404117  | 7.016739  | 4.737094 | -0.002990 | -0.013157 | 0.010981  |
| Na | 2.558546  | 13.685662 | 1.553699 | -0.002973 | 0.013330  | 0.011022  |
| Na | -0.105403 | 0.115939  | 4.813091 | 0.002934  | -0.013194 | -0.011167 |
| B  | 4.155007  | 8.978944  | 1.168663 | -0.002705 | -0.016402 | -0.013199 |
| B  | -1.701865 | 4.822656  | 5.198127 | 0.002787  | 0.016508  | 0.013357  |
| B  | 0.452564  | 2.078144  | 2.014732 | 0.002728  | -0.016464 | 0.013224  |
| B  | 2.000578  | 11.723457 | 4.352058 | -0.002750 | 0.016424  | -0.013260 |



|    |           |           |          |           |           |           |
|----|-----------|-----------|----------|-----------|-----------|-----------|
| B  | -2.733891 | 11.746082 | 5.839177 | -0.011346 | -0.011607 | 0.000471  |
| B  | 5.187034  | 2.055518  | 0.527613 | 0.011470  | 0.011708  | -0.000424 |
| B  | 3.032605  | 4.845282  | 3.711007 | 0.011344  | -0.011652 | -0.000467 |
| B  | -0.579463 | 8.956318  | 2.655782 | -0.011407 | 0.011611  | 0.000458  |
| B  | -0.983708 | 0.054306  | 1.827988 | 0.026477  | -0.000783 | 0.018847  |
| B  | 3.436850  | 13.747295 | 4.538802 | -0.026469 | 0.000854  | -0.018777 |
| B  | 5.591279  | 6.955106  | 1.355407 | -0.026408 | -0.000849 | -0.018779 |
| B  | -3.138137 | 6.846495  | 5.011383 | 0.026526  | 0.000868  | 0.018833  |
| Si | 0.631772  | 3.486686  | 4.508512 | -0.014867 | 0.000318  | -0.012319 |
| Si | 1.821370  | 10.314915 | 1.858278 | 0.014713  | -0.000374 | 0.012324  |
| Si | -0.333059 | 10.387486 | 5.041673 | 0.014784  | 0.000277  | 0.012277  |
| Si | 2.786201  | 3.414115  | 1.325117 | -0.014805 | -0.000571 | -0.012325 |
| O  | 0.061445  | 3.072947  | 3.041906 | -0.019054 | -0.022685 | 0.000041  |
| O  | 2.391697  | 10.728653 | 3.324884 | 0.018932  | 0.022562  | -0.000011 |
| O  | 4.546126  | 9.973747  | 0.141489 | 0.019038  | -0.022660 | -0.000077 |
| O  | -2.092984 | 3.827853  | 6.225301 | -0.018900 | 0.022547  | 0.000014  |
| O  | 2.197450  | 3.933608  | 4.519003 | -0.002617 | -0.029297 | -0.023246 |
| O  | 0.255692  | 9.867992  | 1.847787 | 0.002454  | 0.029237  | 0.023032  |
| O  | -1.898737 | 10.834409 | 5.031182 | 0.002567  | -0.029200 | 0.023079  |
| O  | 4.351879  | 2.967192  | 1.335608 | -0.002506 | 0.029237  | -0.023065 |
| O  | -0.212316 | 4.798696  | 5.055280 | 0.000302  | 0.019024  | -0.030065 |
| O  | 2.665458  | 9.002905  | 1.311510 | -0.000225 | -0.018980 | 0.030223  |
| O  | 0.511030  | 11.699496 | 4.494905 | -0.000272 | 0.018897  | 0.030009  |
| O  | 1.942113  | 2.102105  | 1.871885 | 0.000230  | -0.019273 | -0.030351 |
| O  | 0.525580  | 2.169271  | 5.472081 | -0.023390 | 0.015947  | 0.007611  |
| O  | 1.927562  | 11.632329 | 0.894709 | 0.023633  | -0.016010 | -0.007597 |
| O  | -0.226867 | 9.070071  | 4.078104 | 0.023473  | 0.015891  | -0.007601 |
| O  | 2.680009  | 4.731529  | 2.288686 | -0.023640 | -0.016177 | 0.007604  |
| O  | 0.058846  | 0.698526  | 2.444964 | 0.005613  | -0.007360 | 0.061938  |
| O  | 2.394296  | 13.103075 | 3.921826 | -0.005633 | 0.007401  | -0.061854 |
| O  | 4.548725  | 7.599326  | 0.738431 | -0.005520 | -0.007320 | -0.061818 |
| O  | -2.095583 | 6.202275  | 5.628359 | 0.005727  | 0.007504  | 0.061980  |
| O  | -2.459230 | 13.184059 | 5.445139 | -0.063917 | -0.007417 | 0.010279  |
| O  | 4.912372  | 0.617542  | 0.921651 | 0.063987  | 0.007574  | -0.010169 |
| O  | 2.757943  | 6.283259  | 4.105046 | 0.063993  | -0.007465 | -0.010209 |
| O  | -0.304801 | 7.518342  | 2.261744 | -0.063878 | 0.007402  | 0.010311  |

|   |           |           |          |           |           |           |
|---|-----------|-----------|----------|-----------|-----------|-----------|
| O | -0.175430 | 2.374756  | 0.744070 | 0.009973  | -0.006171 | 0.012161  |
| O | 2.628573  | 11.426844 | 5.622720 | -0.009910 | 0.006358  | -0.012140 |
| O | 4.783002  | 9.275557  | 2.439325 | -0.009925 | -0.006273 | -0.012096 |
| O | -2.329859 | 4.526044  | 3.927465 | 0.009915  | 0.006418  | 0.012262  |
| O | -1.223866 | 12.517207 | 2.155216 | -0.009775 | -0.001344 | -0.007928 |
| O | 3.677009  | 1.284394  | 4.211574 | 0.009834  | 0.001383  | 0.007858  |
| O | 5.831438  | 5.616407  | 1.028179 | 0.009782  | -0.001382 | 0.007827  |
| O | -3.378295 | 8.185194  | 5.338611 | -0.009828 | 0.001412  | -0.007876 |
| H | -0.637445 | 12.195109 | 2.878812 | -0.036794 | -0.026811 | 0.001213  |
| H | 3.090587  | 1.606491  | 3.487978 | 0.036811  | 0.026756  | -0.001277 |
| H | 5.245016  | 5.294309  | 0.304583 | 0.036723  | -0.026740 | -0.001299 |
| H | -2.791874 | 8.507292  | 6.062207 | -0.036844 | 0.026878  | 0.001257  |

130 f = 10.184432 THz    63.990675 2PiTHz    339.716080 cm-1    42.119441 meV

|    | X         | Y         | Z        | dx        | dy       | dz        |
|----|-----------|-----------|----------|-----------|----------|-----------|
| Li | 3.769818  | 9.645336  | 4.001386 | -0.004221 | 0.052472 | 0.032856  |
| Li | -1.316675 | 4.156264  | 2.365404 | -0.004050 | 0.052538 | 0.032721  |
| Li | -3.471104 | 2.744536  | 5.548798 | 0.004128  | 0.052588 | -0.032775 |
| Li | 5.924247  | 11.057064 | 0.817991 | 0.003894  | 0.052669 | -0.032792 |
| Na | 2.049025  | 6.784862  | 1.629696 | -0.003587 | 0.023651 | -0.007214 |
| Na | 0.404117  | 7.016739  | 4.737094 | -0.003594 | 0.023702 | -0.007227 |
| Na | 2.558546  | 13.685662 | 1.553699 | 0.003586  | 0.023642 | 0.007144  |
| Na | -0.105403 | 0.115939  | 4.813091 | 0.003551  | 0.023701 | 0.007264  |
| B  | 4.155007  | 8.978944  | 1.168663 | 0.011288  | 0.008115 | 0.018433  |
| B  | -1.701865 | 4.822656  | 5.198127 | 0.011234  | 0.007986 | 0.018348  |
| B  | 0.452564  | 2.078144  | 2.014732 | -0.011262 | 0.008027 | -0.018402 |
| B  | 2.000578  | 11.723457 | 4.352058 | -0.011234 | 0.007957 | -0.018328 |
| B  | -2.733891 | 11.746082 | 5.839177 | 0.017425  | 0.005497 | 0.005249  |
| B  | 5.187034  | 2.055518  | 0.527613 | 0.017320  | 0.005394 | 0.005211  |
| B  | 3.032605  | 4.845282  | 3.711007 | -0.017375 | 0.005448 | -0.005206 |
| B  | -0.579463 | 8.956318  | 2.655782 | -0.017332 | 0.005351 | -0.005225 |
| B  | -0.983708 | 0.054306  | 1.827988 | -0.008704 | 0.009956 | 0.003567  |
| B  | 3.436850  | 13.747295 | 4.538802 | -0.008545 | 0.009991 | 0.003713  |
| B  | 5.591279  | 6.955106  | 1.355407 | 0.008737  | 0.009973 | -0.003543 |
| B  | -3.138137 | 6.846495  | 5.011383 | 0.008559  | 0.009950 | -0.003648 |

|    |           |           |          |           |           |           |
|----|-----------|-----------|----------|-----------|-----------|-----------|
| Si | 0.631772  | 3.486686  | 4.508512 | -0.011693 | -0.034899 | 0.004601  |
| Si | 1.821370  | 10.314915 | 1.858278 | -0.011855 | -0.034870 | 0.004552  |
| Si | -0.333059 | 10.387486 | 5.041673 | 0.011687  | -0.035019 | -0.004674 |
| Si | 2.786201  | 3.414115  | 1.325117 | 0.011763  | -0.034888 | -0.004538 |
| O  | 0.061445  | 3.072947  | 3.041906 | -0.025580 | -0.019706 | 0.007604  |
| O  | 2.391697  | 10.728653 | 3.324884 | -0.025689 | -0.019810 | 0.007612  |
| O  | 4.546126  | 9.973747  | 0.141489 | 0.025615  | -0.019716 | -0.007665 |
| O  | -2.092984 | 3.827853  | 6.225301 | 0.025676  | -0.019722 | -0.007567 |
| O  | 2.197450  | 3.933608  | 4.519003 | -0.018750 | -0.004416 | -0.020435 |
| O  | 0.255692  | 9.867992  | 1.847787 | -0.018852 | -0.004534 | -0.020597 |
| O  | -1.898737 | 10.834409 | 5.031182 | 0.018765  | -0.004393 | 0.020406  |
| O  | 4.351879  | 2.967192  | 1.335608 | 0.018759  | -0.004540 | 0.020516  |
| O  | -0.212316 | 4.798696  | 5.055280 | 0.012402  | -0.031208 | 0.044287  |
| O  | 2.665458  | 9.002905  | 1.311510 | 0.012419  | -0.031042 | 0.044184  |
| O  | 0.511030  | 11.699496 | 4.494905 | -0.012407 | -0.031338 | -0.044426 |
| O  | 1.942113  | 2.102105  | 1.871885 | -0.012426 | -0.031152 | -0.044268 |
| O  | 0.525580  | 2.169271  | 5.472081 | 0.031600  | -0.034602 | 0.000996  |
| O  | 1.927562  | 11.632329 | 0.894709 | 0.031482  | -0.034478 | 0.001074  |
| O  | -0.226867 | 9.070071  | 4.078104 | -0.031519 | -0.034719 | -0.001031 |
| O  | 2.680009  | 4.731529  | 2.288686 | -0.031431 | -0.034517 | -0.001031 |
| O  | 0.058846  | 0.698526  | 2.444964 | -0.018842 | 0.021568  | -0.006250 |
| O  | 2.394296  | 13.103075 | 3.921826 | -0.018779 | 0.021558  | -0.005892 |
| O  | 4.548725  | 7.599326  | 0.738431 | 0.018930  | 0.021671  | 0.006287  |
| O  | -2.095583 | 6.202275  | 5.628359 | 0.018758  | 0.021541  | 0.006027  |
| O  | -2.459230 | 13.184059 | 5.445139 | -0.000852 | 0.012907  | 0.005003  |
| O  | 4.912372  | 0.617542  | 0.921651 | -0.001226 | 0.012766  | 0.004971  |
| O  | 2.757943  | 6.283259  | 4.105046 | 0.000919  | 0.012815  | -0.004932 |
| O  | -0.304801 | 7.518342  | 2.261744 | 0.001236  | 0.012716  | -0.004890 |
| O  | -0.175430 | 2.374756  | 0.744070 | 0.006537  | 0.035996  | -0.014560 |
| O  | 2.628573  | 11.426844 | 5.622720 | 0.006629  | 0.036044  | -0.014477 |
| O  | 4.783002  | 9.275557  | 2.439325 | -0.006555 | 0.036014  | 0.014626  |
| O  | -2.329859 | 4.526044  | 3.927465 | -0.006602 | 0.035969  | 0.014533  |
| O  | -1.223866 | 12.517207 | 2.155216 | 0.006170  | 0.007579  | -0.004424 |
| O  | 3.677009  | 1.284394  | 4.211574 | 0.006099  | 0.007605  | -0.004479 |
| O  | 5.831438  | 5.616407  | 1.028179 | -0.006149 | 0.007608  | 0.004389  |
| O  | -3.378295 | 8.185194  | 5.338611 | -0.006088 | 0.007591  | 0.004416  |

|   |           |           |          |           |          |           |
|---|-----------|-----------|----------|-----------|----------|-----------|
| H | -0.637445 | 12.195109 | 2.878812 | 0.005109  | 0.004234 | -0.003535 |
| H | 3.090587  | 1.606491  | 3.487978 | 0.004871  | 0.004108 | -0.003530 |
| H | 5.245016  | 5.294309  | 0.304583 | -0.005101 | 0.004313 | 0.003493  |
| H | -2.791874 | 8.507292  | 6.062207 | -0.004905 | 0.004136 | 0.003487  |

131 f = 10.114521 THz 63.551409 2PiTHz 337.384093 cm-1 41.830311 meV

|    | X         | Y         | Z        | dx        | dy        | dz        |
|----|-----------|-----------|----------|-----------|-----------|-----------|
| Li | 3.769818  | 9.645336  | 4.001386 | -0.009267 | 0.039750  | 0.041026  |
| Li | -1.316675 | 4.156264  | 2.365404 | 0.009321  | -0.039827 | -0.041042 |
| Li | -3.471104 | 2.744536  | 5.548798 | -0.009327 | -0.039809 | 0.041088  |
| Li | 5.924247  | 11.057064 | 0.817991 | 0.009298  | 0.039805  | -0.041023 |
| Na | 2.049025  | 6.784862  | 1.629696 | 0.002741  | 0.001280  | -0.000817 |
| Na | 0.404117  | 7.016739  | 4.737094 | -0.002715 | -0.001315 | 0.000872  |
| Na | 2.558546  | 13.685662 | 1.553699 | 0.002730  | -0.001283 | -0.000837 |
| Na | -0.105403 | 0.115939  | 4.813091 | -0.002720 | 0.001239  | 0.000812  |
| B  | 4.155007  | 8.978944  | 1.168663 | 0.009851  | 0.011097  | 0.015186  |
| B  | -1.701865 | 4.822656  | 5.198127 | -0.009864 | -0.011147 | -0.015226 |
| B  | 0.452564  | 2.078144  | 2.014732 | 0.009870  | -0.011145 | 0.015236  |
| B  | 2.000578  | 11.723457 | 4.352058 | -0.009856 | 0.011160  | -0.015237 |
| B  | -2.733891 | 11.746082 | 5.839177 | 0.017759  | 0.011716  | 0.008914  |
| B  | 5.187034  | 2.055518  | 0.527613 | -0.017816 | -0.011727 | -0.008905 |
| B  | 3.032605  | 4.845282  | 3.711007 | 0.017813  | -0.011725 | 0.008907  |
| B  | -0.579463 | 8.956318  | 2.655782 | -0.017808 | 0.011770  | -0.008909 |
| B  | -0.983708 | 0.054306  | 1.827988 | 0.008217  | -0.016939 | -0.001225 |
| B  | 3.436850  | 13.747295 | 4.538802 | -0.008265 | 0.016945  | 0.001183  |
| B  | 5.591279  | 6.955106  | 1.355407 | 0.008174  | 0.016934  | -0.001238 |
| B  | -3.138137 | 6.846495  | 5.011383 | -0.008213 | -0.016951 | 0.001219  |
| Si | 0.631772  | 3.486686  | 4.508512 | 0.009890  | 0.038496  | -0.003495 |
| Si | 1.821370  | 10.314915 | 1.858278 | -0.009825 | -0.038491 | 0.003479  |
| Si | -0.333059 | 10.387486 | 5.041673 | 0.009889  | -0.038445 | -0.003442 |
| Si | 2.786201  | 3.414115  | 1.325117 | -0.009882 | 0.038514  | 0.003498  |
| O  | 0.061445  | 3.072947  | 3.041906 | 0.023731  | 0.018532  | -0.007090 |
| O  | 2.391697  | 10.728653 | 3.324884 | -0.023631 | -0.018496 | 0.007064  |
| O  | 4.546126  | 9.973747  | 0.141489 | 0.023713  | -0.018556 | -0.007068 |
| O  | -2.092984 | 3.827853  | 6.225301 | -0.023724 | 0.018541  | 0.007096  |

|   |           |           |          |           |           |           |
|---|-----------|-----------|----------|-----------|-----------|-----------|
| O | 2.197450  | 3.933608  | 4.519003 | 0.017545  | 0.005291  | 0.028377  |
| O | 0.255692  | 9.867992  | 1.847787 | -0.017512 | -0.005233 | -0.028342 |
| O | -1.898737 | 10.834409 | 5.031182 | 0.017518  | -0.005346 | 0.028432  |
| O | 4.351879  | 2.967192  | 1.335608 | -0.017545 | 0.005288  | -0.028372 |
| O | -0.212316 | 4.798696  | 5.055280 | -0.008856 | 0.035402  | -0.032526 |
| O | 2.665458  | 9.002905  | 1.311510 | 0.008822  | -0.035458 | 0.032466  |
| O | 0.511030  | 11.699496 | 4.494905 | -0.008832 | -0.035350 | -0.032406 |
| O | 1.942113  | 2.102105  | 1.871885 | 0.008858  | 0.035416  | 0.032514  |
| O | 0.525580  | 2.169271  | 5.472081 | -0.023016 | 0.032462  | -0.005633 |
| O | 1.927562  | 11.632329 | 0.894709 | 0.023021  | -0.032454 | 0.005624  |
| O | -0.226867 | 9.070071  | 4.078104 | -0.022941 | -0.032365 | -0.005649 |
| O | 2.680009  | 4.731529  | 2.288686 | 0.023015  | 0.032475  | 0.005636  |
| O | 0.058846  | 0.698526  | 2.444964 | 0.021651  | -0.026677 | 0.000214  |
| O | 2.394296  | 13.103075 | 3.921826 | -0.021671 | 0.026679  | -0.000297 |
| O | 4.548725  | 7.599326  | 0.738431 | 0.021620  | 0.026633  | 0.000130  |
| O | -2.095583 | 6.202275  | 5.628359 | -0.021657 | -0.026682 | -0.000198 |
| O | -2.459230 | 13.184059 | 5.445139 | 0.000839  | 0.022104  | 0.006707  |
| O | 4.912372  | 0.617542  | 0.921651 | -0.000946 | -0.022134 | -0.006720 |
| O | 2.757943  | 6.283259  | 4.105046 | 0.000956  | -0.022132 | 0.006702  |
| O | -0.304801 | 7.518342  | 2.261744 | -0.001044 | 0.022134  | -0.006682 |
| O | -0.175430 | 2.374756  | 0.744070 | -0.008880 | -0.045683 | 0.011963  |
| O | 2.628573  | 11.426844 | 5.622720 | 0.008845  | 0.045657  | -0.011957 |
| O | 4.783002  | 9.275557  | 2.439325 | -0.008889 | 0.045653  | 0.011912  |
| O | -2.329859 | 4.526044  | 3.927465 | 0.008877  | -0.045671 | -0.011952 |
| O | -1.223866 | 12.517207 | 2.155216 | -0.006222 | -0.013336 | 0.008535  |
| O | 3.677009  | 1.284394  | 4.211574 | 0.006230  | 0.013341  | -0.008520 |
| O | 5.831438  | 5.616407  | 1.028179 | -0.006215 | 0.013336  | 0.008511  |
| O | -3.378295 | 8.185194  | 5.338611 | 0.006211  | -0.013349 | -0.008556 |
| H | -0.637445 | 12.195109 | 2.878812 | -0.004778 | -0.022430 | 0.004687  |
| H | 3.090587  | 1.606491  | 3.487978 | 0.004837  | 0.022479  | -0.004695 |
| H | 5.245016  | 5.294309  | 0.304583 | -0.004764 | 0.022412  | 0.004666  |
| H | -2.791874 | 8.507292  | 6.062207 | 0.004755  | -0.022425 | -0.004709 |

132 f = 10.038839 THz      63.075886 2PiTHz      334.859618 cm-1      41.517316 meV

X                      Y                      Z                      dx                      dy                      dz

|    |           |           |          |           |           |           |
|----|-----------|-----------|----------|-----------|-----------|-----------|
| Li | 3.769818  | 9.645336  | 4.001386 | -0.037442 | -0.044994 | 0.016141  |
| Li | -1.316675 | 4.156264  | 2.365404 | -0.037375 | -0.044960 | 0.016044  |
| Li | -3.471104 | 2.744536  | 5.548798 | -0.037382 | 0.044775  | 0.016135  |
| Li | 5.924247  | 11.057064 | 0.817991 | -0.037407 | 0.044867  | 0.016162  |
| Na | 2.049025  | 6.784862  | 1.629696 | -0.007798 | 0.001642  | -0.006171 |
| Na | 0.404117  | 7.016739  | 4.737094 | -0.007828 | 0.001680  | -0.006122 |
| Na | 2.558546  | 13.685662 | 1.553699 | -0.007834 | -0.001735 | -0.006136 |
| Na | -0.105403 | 0.115939  | 4.813091 | -0.007814 | -0.001691 | -0.006191 |
| B  | 4.155007  | 8.978944  | 1.168663 | 0.000918  | 0.021058  | 0.012749  |
| B  | -1.701865 | 4.822656  | 5.198127 | 0.000905  | 0.020986  | 0.012699  |
| B  | 0.452564  | 2.078144  | 2.014732 | 0.000948  | -0.021015 | 0.012757  |
| B  | 2.000578  | 11.723457 | 4.352058 | 0.000939  | -0.021063 | 0.012771  |
| B  | -2.733891 | 11.746082 | 5.839177 | 0.008215  | 0.018175  | 0.004266  |
| B  | 5.187034  | 2.055518  | 0.527613 | 0.008170  | 0.018113  | 0.004273  |
| B  | 3.032605  | 4.845282  | 3.711007 | 0.008219  | -0.018140 | 0.004285  |
| B  | -0.579463 | 8.956318  | 2.655782 | 0.008252  | -0.018180 | 0.004274  |
| B  | -0.983708 | 0.054306  | 1.827988 | 0.002766  | 0.004274  | 0.011559  |
| B  | 3.436850  | 13.747295 | 4.538802 | 0.002837  | 0.004283  | 0.011642  |
| B  | 5.591279  | 6.955106  | 1.355407 | 0.002813  | -0.004290 | 0.011638  |
| B  | -3.138137 | 6.846495  | 5.011383 | 0.002730  | -0.004323 | 0.011560  |
| Si | 0.631772  | 3.486686  | 4.508512 | -0.014432 | 0.024463  | -0.006784 |
| Si | 1.821370  | 10.314915 | 1.858278 | -0.014492 | 0.024405  | -0.006844 |
| Si | -0.333059 | 10.387486 | 5.041673 | -0.014524 | -0.024368 | -0.006834 |
| Si | 2.786201  | 3.414115  | 1.325117 | -0.014470 | -0.024334 | -0.006779 |
| O  | 0.061445  | 3.072947  | 3.041906 | 0.002964  | -0.024058 | 0.007072  |
| O  | 2.391697  | 10.728653 | 3.324884 | 0.002902  | -0.024185 | 0.007068  |
| O  | 4.546126  | 9.973747  | 0.141489 | 0.002836  | 0.024230  | 0.007096  |
| O  | -2.092984 | 3.827853  | 6.225301 | 0.002862  | 0.024129  | 0.007097  |
| O  | 2.197450  | 3.933608  | 4.519003 | -0.010395 | -0.010478 | -0.026524 |
| O  | 0.255692  | 9.867992  | 1.847787 | -0.010428 | -0.010588 | -0.026642 |
| O  | -1.898737 | 10.834409 | 5.031182 | -0.010476 | 0.010584  | -0.026683 |
| O  | 4.351879  | 2.967192  | 1.335608 | -0.010460 | 0.010489  | -0.026590 |
| O  | -0.212316 | 4.798696  | 5.055280 | -0.003562 | 0.045921  | -0.048457 |
| O  | 2.665458  | 9.002905  | 1.311510 | -0.003568 | 0.045955  | -0.048623 |
| O  | 0.511030  | 11.699496 | 4.494905 | -0.003548 | -0.045920 | -0.048532 |
| O  | 1.942113  | 2.102105  | 1.871885 | -0.003520 | -0.045805 | -0.048326 |

|   |           |           |          |           |           |           |
|---|-----------|-----------|----------|-----------|-----------|-----------|
| O | 0.525580  | 2.169271  | 5.472081 | 0.035533  | 0.025471  | 0.000550  |
| O | 1.927562  | 11.632329 | 0.894709 | 0.035480  | 0.025469  | 0.000556  |
| O | -0.226867 | 9.070071  | 4.078104 | 0.035569  | -0.025437 | 0.000565  |
| O | 2.680009  | 4.731529  | 2.288686 | 0.035640  | -0.025342 | 0.000545  |
| O | 0.058846  | 0.698526  | 2.444964 | 0.001773  | -0.012075 | 0.029117  |
| O | 2.394296  | 13.103075 | 3.921826 | 0.001750  | -0.012065 | 0.029339  |
| O | 4.548725  | 7.599326  | 0.738431 | 0.001700  | 0.012028  | 0.029322  |
| O | -2.095583 | 6.202275  | 5.628359 | 0.001706  | 0.011998  | 0.029089  |
| O | -2.459230 | 13.184059 | 5.445139 | 0.010712  | 0.023272  | 0.018906  |
| O | 4.912372  | 0.617542  | 0.921651 | 0.010498  | 0.023220  | 0.018919  |
| O | 2.757943  | 6.283259  | 4.105046 | 0.010471  | -0.023264 | 0.018932  |
| O | -0.304801 | 7.518342  | 2.261744 | 0.010709  | -0.023273 | 0.018883  |
| O | -0.175430 | 2.374756  | 0.744070 | -0.001860 | 0.019385  | 0.029562  |
| O | 2.628573  | 11.426844 | 5.622720 | -0.001854 | 0.019467  | 0.029602  |
| O | 4.783002  | 9.275557  | 2.439325 | -0.001838 | -0.019509 | 0.029589  |
| O | -2.329859 | 4.526044  | 3.927465 | -0.001844 | -0.019510 | 0.029519  |
| O | -1.223866 | 12.517207 | 2.155216 | 0.010094  | -0.002531 | -0.015371 |
| O | 3.677009  | 1.284394  | 4.211574 | 0.010083  | -0.002530 | -0.015386 |
| O | 5.831438  | 5.616407  | 1.028179 | 0.010096  | 0.002521  | -0.015386 |
| O | -3.378295 | 8.185194  | 5.338611 | 0.010144  | 0.002491  | -0.015374 |
| H | -0.637445 | 12.195109 | 2.878812 | 0.000102  | -0.010129 | -0.008733 |
| H | 3.090587  | 1.606491  | 3.487978 | 0.000011  | -0.010188 | -0.008719 |
| H | 5.245016  | 5.294309  | 0.304583 | 0.000020  | 0.010179  | -0.008711 |
| H | -2.791874 | 8.507292  | 6.062207 | 0.000172  | 0.010065  | -0.008739 |

133 f = 9.908906 THz 62.259494 2PiTHz 330.525525 cm-1 40.979957 meV

|    | X         | Y         | Z        | dx        | dy        | dz        |
|----|-----------|-----------|----------|-----------|-----------|-----------|
| Li | 3.769818  | 9.645336  | 4.001386 | -0.009885 | 0.021581  | -0.029771 |
| Li | -1.316675 | 4.156264  | 2.365404 | -0.009890 | 0.021531  | -0.029819 |
| Li | -3.471104 | 2.744536  | 5.548798 | -0.009850 | -0.021638 | -0.029764 |
| Li | 5.924247  | 11.057064 | 0.817991 | -0.009853 | -0.021571 | -0.029820 |
| Na | 2.049025  | 6.784862  | 1.629696 | -0.007826 | 0.002074  | -0.006393 |
| Na | 0.404117  | 7.016739  | 4.737094 | -0.007860 | 0.002080  | -0.006355 |
| Na | 2.558546  | 13.685662 | 1.553699 | -0.007865 | -0.002122 | -0.006369 |
| Na | -0.105403 | 0.115939  | 4.813091 | -0.007831 | -0.002046 | -0.006385 |

|    |           |           |          |           |           |           |
|----|-----------|-----------|----------|-----------|-----------|-----------|
| B  | 4.155007  | 8.978944  | 1.168663 | 0.008175  | 0.010485  | 0.006705  |
| B  | -1.701865 | 4.822656  | 5.198127 | 0.008157  | 0.010429  | 0.006655  |
| B  | 0.452564  | 2.078144  | 2.014732 | 0.008168  | -0.010439 | 0.006683  |
| B  | 2.000578  | 11.723457 | 4.352058 | 0.008169  | -0.010479 | 0.006683  |
| B  | -2.733891 | 11.746082 | 5.839177 | 0.007206  | 0.010550  | -0.005120 |
| B  | 5.187034  | 2.055518  | 0.527613 | 0.007157  | 0.010502  | -0.005131 |
| B  | 3.032605  | 4.845282  | 3.711007 | 0.007180  | -0.010522 | -0.005104 |
| B  | -0.579463 | 8.956318  | 2.655782 | 0.007195  | -0.010528 | -0.005138 |
| B  | -0.983708 | 0.054306  | 1.827988 | 0.029008  | -0.000183 | 0.010974  |
| B  | 3.436850  | 13.747295 | 4.538802 | 0.029041  | -0.000167 | 0.011001  |
| B  | 5.591279  | 6.955106  | 1.355407 | 0.029044  | 0.000184  | 0.010991  |
| B  | -3.138137 | 6.846495  | 5.011383 | 0.028983  | 0.000157  | 0.010977  |
| Si | 0.631772  | 3.486686  | 4.508512 | -0.017300 | 0.014631  | -0.012304 |
| Si | 1.821370  | 10.314915 | 1.858278 | -0.017333 | 0.014602  | -0.012341 |
| Si | -0.333059 | 10.387486 | 5.041673 | -0.017343 | -0.014640 | -0.012325 |
| Si | 2.786201  | 3.414115  | 1.325117 | -0.017323 | -0.014564 | -0.012305 |
| O  | 0.061445  | 3.072947  | 3.041906 | -0.025591 | 0.007757  | -0.012941 |
| O  | 2.391697  | 10.728653 | 3.324884 | -0.025644 | 0.007677  | -0.012940 |
| O  | 4.546126  | 9.973747  | 0.141489 | -0.025649 | -0.007677 | -0.012920 |
| O  | -2.092984 | 3.827853  | 6.225301 | -0.025612 | -0.007725 | -0.012942 |
| O  | 2.197450  | 3.933608  | 4.519003 | -0.001425 | -0.018655 | -0.009419 |
| O  | 0.255692  | 9.867992  | 1.847787 | -0.001437 | -0.018720 | -0.009533 |
| O  | -1.898737 | 10.834409 | 5.031182 | -0.001446 | 0.018694  | -0.009470 |
| O  | 4.351879  | 2.967192  | 1.335608 | -0.001465 | 0.018655  | -0.009499 |
| O  | -0.212316 | 4.798696  | 5.055280 | 0.010611  | 0.016586  | 0.030400  |
| O  | 2.665458  | 9.002905  | 1.311510 | 0.010627  | 0.016573  | 0.030414  |
| O  | 0.511030  | 11.699496 | 4.494905 | 0.010621  | -0.016623 | 0.030396  |
| O  | 1.942113  | 2.102105  | 1.871885 | 0.010613  | -0.016518 | 0.030449  |
| O  | 0.525580  | 2.169271  | 5.472081 | -0.056947 | 0.028570  | 0.007674  |
| O  | 1.927562  | 11.632329 | 0.894709 | -0.056972 | 0.028604  | 0.007708  |
| O  | -0.226867 | 9.070071  | 4.078104 | -0.056972 | -0.028608 | 0.007691  |
| O  | 2.680009  | 4.731529  | 2.288686 | -0.056908 | -0.028534 | 0.007701  |
| O  | 0.058846  | 0.698526  | 2.444964 | 0.033204  | -0.016124 | 0.025758  |
| O  | 2.394296  | 13.103075 | 3.921826 | 0.033201  | -0.016130 | 0.025847  |
| O  | 4.548725  | 7.599326  | 0.738431 | 0.033203  | 0.016143  | 0.025850  |
| O  | -2.095583 | 6.202275  | 5.628359 | 0.033155  | 0.016076  | 0.025748  |



|   |           |           |          |           |           |           |
|---|-----------|-----------|----------|-----------|-----------|-----------|
| O | -2.459230 | 13.184059 | 5.445139 | 0.047579  | 0.008241  | -0.001347 |
| O | 4.912372  | 0.617542  | 0.921651 | 0.047463  | 0.008181  | -0.001344 |
| O | 2.757943  | 6.283259  | 4.105046 | 0.047458  | -0.008217 | -0.001331 |
| O | -0.304801 | 7.518342  | 2.261744 | 0.047551  | -0.008191 | -0.001374 |
| O | -0.175430 | 2.374756  | 0.744070 | 0.021944  | -0.027597 | -0.011477 |
| O | 2.628573  | 11.426844 | 5.622720 | 0.021991  | -0.027547 | -0.011478 |
| O | 4.783002  | 9.275557  | 2.439325 | 0.021983  | 0.027615  | -0.011465 |
| O | -2.329859 | 4.526044  | 3.927465 | 0.021955  | 0.027526  | -0.011493 |
| O | -1.223866 | 12.517207 | 2.155216 | -0.011661 | 0.004676  | 0.006274  |
| O | 3.677009  | 1.284394  | 4.211574 | -0.011680 | 0.004690  | 0.006258  |
| O | 5.831438  | 5.616407  | 1.028179 | -0.011651 | -0.004674 | 0.006266  |
| O | -3.378295 | 8.185194  | 5.338611 | -0.011645 | -0.004696 | 0.006276  |
| H | -0.637445 | 12.195109 | 2.878812 | -0.025601 | -0.016072 | 0.006590  |
| H | 3.090587  | 1.606491  | 3.487978 | -0.025639 | -0.016084 | 0.006575  |
| H | 5.245016  | 5.294309  | 0.304583 | -0.025598 | 0.016087  | 0.006582  |
| H | -2.791874 | 8.507292  | 6.062207 | -0.025567 | 0.016037  | 0.006582  |

134 f = 9.758651 THz 61.315412 2PiTHz 325.513548 cm-1 40.358551 meV

|    | X         | Y         | Z        | dx        | dy        | dz        |
|----|-----------|-----------|----------|-----------|-----------|-----------|
| Li | 3.769818  | 9.645336  | 4.001386 | -0.043290 | -0.050387 | 0.034724  |
| Li | -1.316675 | 4.156264  | 2.365404 | 0.043314  | 0.050378  | -0.034764 |
| Li | -3.471104 | 2.744536  | 5.548798 | 0.043327  | -0.050409 | -0.034733 |
| Li | 5.924247  | 11.057064 | 0.817991 | -0.043326 | 0.050374  | 0.034766  |
| Na | 2.049025  | 6.784862  | 1.629696 | -0.000394 | 0.001208  | 0.001985  |
| Na | 0.404117  | 7.016739  | 4.737094 | 0.000400  | -0.001215 | -0.001920 |
| Na | 2.558546  | 13.685662 | 1.553699 | 0.000401  | 0.001199  | -0.001924 |
| Na | -0.105403 | 0.115939  | 4.813091 | -0.000392 | -0.001216 | 0.001985  |
| B  | 4.155007  | 8.978944  | 1.168663 | 0.001299  | -0.008292 | -0.002131 |
| B  | -1.701865 | 4.822656  | 5.198127 | -0.001288 | 0.008275  | 0.002103  |
| B  | 0.452564  | 2.078144  | 2.014732 | -0.001292 | -0.008274 | 0.002117  |
| B  | 2.000578  | 11.723457 | 4.352058 | 0.001302  | 0.008278  | -0.002119 |
| B  | -2.733891 | 11.746082 | 5.839177 | -0.001436 | -0.001585 | 0.012140  |
| B  | 5.187034  | 2.055518  | 0.527613 | 0.001412  | 0.001577  | -0.012155 |
| B  | 3.032605  | 4.845282  | 3.711007 | 0.001420  | -0.001584 | -0.012142 |

|    |           |           |          |           |           |           |
|----|-----------|-----------|----------|-----------|-----------|-----------|
| B  | -0.579463 | 8.956318  | 2.655782 | -0.001416 | 0.001571  | 0.012146  |
| B  | -0.983708 | 0.054306  | 1.827988 | 0.001617  | -0.002740 | -0.021332 |
| B  | 3.436850  | 13.747295 | 4.538802 | -0.001611 | 0.002746  | 0.021309  |
| B  | 5.591279  | 6.955106  | 1.355407 | -0.001605 | -0.002762 | 0.021314  |
| B  | -3.138137 | 6.846495  | 5.011383 | 0.001615  | 0.002742  | -0.021325 |
| Si | 0.631772  | 3.486686  | 4.508512 | 0.000417  | 0.006769  | 0.000680  |
| Si | 1.821370  | 10.314915 | 1.858278 | -0.000410 | -0.006758 | -0.000682 |
| Si | -0.333059 | 10.387486 | 5.041673 | -0.000409 | 0.006783  | -0.000682 |
| Si | 2.786201  | 3.414115  | 1.325117 | 0.000413  | -0.006748 | 0.000676  |
| O  | 0.061445  | 3.072947  | 3.041906 | -0.030241 | -0.007634 | 0.006812  |
| O  | 2.391697  | 10.728653 | 3.324884 | 0.030239  | 0.007663  | -0.006827 |
| O  | 4.546126  | 9.973747  | 0.141489 | 0.030218  | -0.007655 | -0.006823 |
| O  | -2.092984 | 3.827853  | 6.225301 | -0.030229 | 0.007642  | 0.006802  |
| O  | 2.197450  | 3.933608  | 4.519003 | 0.016118  | -0.018460 | 0.003291  |
| O  | 0.255692  | 9.867992  | 1.847787 | -0.016103 | 0.018475  | -0.003225 |
| O  | -1.898737 | 10.834409 | 5.031182 | -0.016105 | -0.018456 | -0.003255 |
| O  | 4.351879  | 2.967192  | 1.335608 | 0.016108  | 0.018466  | 0.003254  |
| O  | -0.212316 | 4.798696  | 5.055280 | 0.010821  | -0.003986 | 0.056174  |
| O  | 2.665458  | 9.002905  | 1.311510 | -0.010811 | 0.003987  | -0.056142 |
| O  | 0.511030  | 11.699496 | 4.494905 | -0.010804 | -0.003957 | -0.056117 |
| O  | 1.942113  | 2.102105  | 1.871885 | 0.010818  | 0.004016  | 0.056193  |
| O  | 0.525580  | 2.169271  | 5.472081 | -0.055084 | 0.015588  | 0.006850  |
| O  | 1.927562  | 11.632329 | 0.894709 | 0.054998  | -0.015570 | -0.006850 |
| O  | -0.226867 | 9.070071  | 4.078104 | 0.055026  | 0.015586  | -0.006844 |
| O  | 2.680009  | 4.731529  | 2.288686 | -0.055078 | -0.015582 | 0.006863  |
| O  | 0.058846  | 0.698526  | 2.444964 | 0.000425  | -0.008637 | -0.013051 |
| O  | 2.394296  | 13.103075 | 3.921826 | -0.000397 | 0.008622  | 0.013022  |
| O  | 4.548725  | 7.599326  | 0.738431 | -0.000402 | -0.008645 | 0.013024  |
| O  | -2.095583 | 6.202275  | 5.628359 | 0.000415  | 0.008629  | -0.013047 |
| O  | -2.459230 | 13.184059 | 5.445139 | -0.001472 | 0.010302  | 0.028180  |
| O  | 4.912372  | 0.617542  | 0.921651 | 0.001463  | -0.010315 | -0.028205 |
| O  | 2.757943  | 6.283259  | 4.105046 | 0.001473  | 0.010310  | -0.028203 |
| O  | -0.304801 | 7.518342  | 2.261744 | -0.001460 | -0.010318 | 0.028188  |
| O  | -0.175430 | 2.374756  | 0.744070 | 0.021957  | -0.042577 | -0.026888 |
| O  | 2.628573  | 11.426844 | 5.622720 | -0.021957 | 0.042519  | 0.026867  |
| O  | 4.783002  | 9.275557  | 2.439325 | -0.021944 | -0.042562 | 0.026856  |

|   |           |           |          |           |           |           |
|---|-----------|-----------|----------|-----------|-----------|-----------|
| O | -2.329859 | 4.526044  | 3.927465 | 0.021960  | 0.042555  | -0.026898 |
| O | -1.223866 | 12.517207 | 2.155216 | 0.011905  | 0.002034  | 0.000892  |
| O | 3.677009  | 1.284394  | 4.211574 | -0.011919 | -0.002020 | -0.000879 |
| O | 5.831438  | 5.616407  | 1.028179 | -0.011907 | 0.002008  | -0.000893 |
| O | -3.378295 | 8.185194  | 5.338611 | 0.011906  | -0.002030 | 0.000889  |
| H | -0.637445 | 12.195109 | 2.878812 | 0.026211  | 0.016100  | -0.001676 |
| H | 3.090587  | 1.606491  | 3.487978 | -0.026214 | -0.016066 | 0.001685  |
| H | 5.245016  | 5.294309  | 0.304583 | -0.026209 | 0.016066  | 0.001671  |
| H | -2.791874 | 8.507292  | 6.062207 | 0.026208  | -0.016089 | -0.001677 |

135 f = 9.084128 THz 57.077261 2PiTHz 303.013891 cm-1 37.568948  
meV

|    | X         | Y         | Z        | dx        | dy        | dz        |
|----|-----------|-----------|----------|-----------|-----------|-----------|
| Li | 3.769818  | 9.645336  | 4.001386 | 0.030462  | -0.009178 | 0.028015  |
| Li | -1.316675 | 4.156264  | 2.365404 | 0.030752  | -0.009020 | 0.027917  |
| Li | -3.471104 | 2.744536  | 5.548798 | -0.030711 | -0.009033 | -0.027927 |
| Li | 5.924247  | 11.057064 | 0.817991 | -0.030461 | -0.009162 | -0.028022 |
| Na | 2.049025  | 6.784862  | 1.629696 | 0.010180  | 0.003821  | 0.005109  |
| Na | 0.404117  | 7.016739  | 4.737094 | 0.010226  | 0.003968  | 0.004991  |
| Na | 2.558546  | 13.685662 | 1.553699 | -0.010227 | 0.003969  | -0.004989 |
| Na | -0.105403 | 0.115939  | 4.813091 | -0.010177 | 0.003817  | -0.005104 |
| B  | 4.155007  | 8.978944  | 1.168663 | -0.023275 | -0.005728 | -0.004350 |
| B  | -1.701865 | 4.822656  | 5.198127 | -0.023437 | -0.005759 | -0.004404 |
| B  | 0.452564  | 2.078144  | 2.014732 | 0.023436  | -0.005758 | 0.004401  |
| B  | 2.000578  | 11.723457 | 4.352058 | 0.023275  | -0.005732 | 0.004348  |
| B  | -2.733891 | 11.746082 | 5.839177 | 0.009425  | 0.003556  | 0.024164  |
| B  | 5.187034  | 2.055518  | 0.527613 | 0.009501  | 0.003529  | 0.024321  |
| B  | 3.032605  | 4.845282  | 3.711007 | -0.009500 | 0.003538  | -0.024326 |
| B  | -0.579463 | 8.956318  | 2.655782 | -0.009421 | 0.003545  | -0.024165 |
| B  | -0.983708 | 0.054306  | 1.827988 | 0.004436  | 0.001328  | 0.004212  |
| B  | 3.436850  | 13.747295 | 4.538802 | 0.004368  | 0.001328  | 0.004164  |
| B  | 5.591279  | 6.955106  | 1.355407 | -0.004383 | 0.001329  | -0.004172 |
| B  | -3.138137 | 6.846495  | 5.011383 | -0.004436 | 0.001332  | -0.004229 |
| Si | 0.631772  | 3.486686  | 4.508512 | -0.007568 | -0.000557 | 0.017497  |
| Si | 1.821370  | 10.314915 | 1.858278 | -0.007469 | -0.000526 | 0.017401  |

|    |           |           |          |           |           |           |
|----|-----------|-----------|----------|-----------|-----------|-----------|
| Si | -0.333059 | 10.387486 | 5.041673 | 0.007469  | -0.000539 | -0.017402 |
| Si | 2.786201  | 3.414115  | 1.325117 | 0.007580  | -0.000540 | -0.017488 |
| O  | 0.061445  | 3.072947  | 3.041906 | 0.052999  | 0.008315  | -0.004019 |
| O  | 2.391697  | 10.728653 | 3.324884 | 0.052731  | 0.008193  | -0.003956 |
| O  | 4.546126  | 9.973747  | 0.141489 | -0.052728 | 0.008199  | 0.003959  |
| O  | -2.092984 | 3.827853  | 6.225301 | -0.053005 | 0.008337  | 0.004035  |
| O  | 2.197450  | 3.933608  | 4.519003 | -0.009959 | -0.008072 | -0.040713 |
| O  | 0.255692  | 9.867992  | 1.847787 | -0.009856 | -0.008015 | -0.040456 |
| O  | -1.898737 | 10.834409 | 5.031182 | 0.009854  | -0.008030 | 0.040467  |
| O  | 4.351879  | 2.967192  | 1.335608 | 0.009971  | -0.008070 | 0.040721  |
| O  | -0.212316 | 4.798696  | 5.055280 | -0.023074 | -0.023816 | 0.026442  |
| O  | 2.665458  | 9.002905  | 1.311510 | -0.022924 | -0.023716 | 0.026306  |
| O  | 0.511030  | 11.699496 | 4.494905 | 0.022925  | -0.023725 | -0.026299 |
| O  | 1.942113  | 2.102105  | 1.871885 | 0.023075  | -0.023792 | -0.026425 |
| O  | 0.525580  | 2.169271  | 5.472081 | -0.023610 | 0.020402  | 0.034607  |
| O  | 1.927562  | 11.632329 | 0.894709 | -0.023437 | 0.020322  | 0.034406  |
| O  | -0.226867 | 9.070071  | 4.078104 | 0.023438  | 0.020306  | -0.034405 |
| O  | 2.680009  | 4.731529  | 2.288686 | 0.023590  | 0.020417  | -0.034603 |
| O  | 0.058846  | 0.698526  | 2.444964 | -0.013073 | 0.005032  | 0.036137  |
| O  | 2.394296  | 13.103075 | 3.921826 | -0.013057 | 0.005022  | 0.035904  |
| O  | 4.548725  | 7.599326  | 0.738431 | 0.013057  | 0.005034  | -0.035925 |
| O  | -2.095583 | 6.202275  | 5.628359 | 0.013063  | 0.005030  | -0.036145 |
| O  | -2.459230 | 13.184059 | 5.445139 | 0.030812  | 0.000128  | -0.016663 |
| O  | 4.912372  | 0.617542  | 0.921651 | 0.031011  | 0.000137  | -0.016712 |
| O  | 2.757943  | 6.283259  | 4.105046 | -0.031008 | 0.000153  | 0.016685  |
| O  | -0.304801 | 7.518342  | 2.261744 | -0.030816 | 0.000111  | 0.016662  |
| O  | -0.175430 | 2.374756  | 0.744070 | 0.012959  | -0.000809 | 0.010721  |
| O  | 2.628573  | 11.426844 | 5.622720 | 0.012865  | -0.000745 | 0.010639  |
| O  | 4.783002  | 9.275557  | 2.439325 | -0.012863 | -0.000765 | -0.010636 |
| O  | -2.329859 | 4.526044  | 3.927465 | -0.012954 | -0.000804 | -0.010733 |
| O  | -1.223866 | 12.517207 | 2.155216 | -0.027232 | 0.000089  | -0.023476 |
| O  | 3.677009  | 1.284394  | 4.211574 | -0.027030 | 0.000101  | -0.023276 |
| O  | 5.831438  | 5.616407  | 1.028179 | 0.026994  | 0.000099  | 0.023269  |
| O  | -3.378295 | 8.185194  | 5.338611 | 0.027234  | 0.000090  | 0.023464  |
| H  | -0.637445 | 12.195109 | 2.878812 | -0.039950 | -0.022820 | -0.025052 |
| H  | 3.090587  | 1.606491  | 3.487978 | -0.039438 | -0.022605 | -0.025001 |

|   |           |          |          |          |           |          |
|---|-----------|----------|----------|----------|-----------|----------|
| H | 5.245016  | 5.294309 | 0.304583 | 0.039396 | -0.022603 | 0.024995 |
| H | -2.791874 | 8.507292 | 6.062207 | 0.039947 | -0.022821 | 0.025045 |

136 f = 9.032121 THz 56.750493 2PiTHz 301.279133 cm-1 37.353865 meV

|    | X         | Y         | Z        | dx        | dy        | dz        |
|----|-----------|-----------|----------|-----------|-----------|-----------|
| Li | 3.769818  | 9.645336  | 4.001386 | -0.040964 | -0.021312 | 0.016180  |
| Li | -1.316675 | 4.156264  | 2.365404 | 0.040761  | 0.021506  | -0.016370 |
| Li | -3.471104 | 2.744536  | 5.548798 | -0.040745 | 0.021433  | 0.016351  |
| Li | 5.924247  | 11.057064 | 0.817991 | 0.040959  | -0.021394 | -0.016205 |
| Na | 2.049025  | 6.784862  | 1.629696 | -0.001598 | -0.021520 | 0.011833  |
| Na | 0.404117  | 7.016739  | 4.737094 | 0.001549  | 0.021272  | -0.011769 |
| Na | 2.558546  | 13.685662 | 1.553699 | -0.001532 | 0.021474  | 0.011792  |
| Na | -0.105403 | 0.115939  | 4.813091 | 0.001612  | -0.021331 | -0.011806 |
| B  | 4.155007  | 8.978944  | 1.168663 | 0.025754  | 0.003858  | 0.005701  |
| B  | -1.701865 | 4.822656  | 5.198127 | -0.025595 | -0.003781 | -0.005705 |
| B  | 0.452564  | 2.078144  | 2.014732 | 0.025578  | -0.003799 | 0.005695  |
| B  | 2.000578  | 11.723457 | 4.352058 | -0.025765 | 0.003847  | -0.005710 |
| B  | -2.733891 | 11.746082 | 5.839177 | -0.010258 | 0.001973  | -0.020933 |
| B  | 5.187034  | 2.055518  | 0.527613 | 0.010219  | -0.001999 | 0.020805  |
| B  | 3.032605  | 4.845282  | 3.711007 | -0.010208 | -0.001998 | -0.020807 |
| B  | -0.579463 | 8.956318  | 2.655782 | 0.010268  | 0.001991  | 0.020943  |
| B  | -0.983708 | 0.054306  | 1.827988 | 0.011662  | -0.000864 | 0.006958  |
| B  | 3.436850  | 13.747295 | 4.538802 | -0.011692 | 0.000847  | -0.006942 |
| B  | 5.591279  | 6.955106  | 1.355407 | 0.011713  | 0.000883  | 0.006973  |
| B  | -3.138137 | 6.846495  | 5.011383 | -0.011666 | -0.000831 | -0.006959 |
| Si | 0.631772  | 3.486686  | 4.508512 | -0.014860 | -0.001161 | 0.015863  |
| Si | 1.821370  | 10.314915 | 1.858278 | 0.014910  | 0.001138  | -0.015995 |
| Si | -0.333059 | 10.387486 | 5.041673 | -0.014908 | 0.001135  | 0.015968  |
| Si | 2.786201  | 3.414115  | 1.325117 | 0.014863  | -0.001173 | -0.015886 |
| O  | 0.061445  | 3.072947  | 3.041906 | 0.044316  | 0.019353  | -0.010468 |
| O  | 2.391697  | 10.728653 | 3.324884 | -0.044739 | -0.019414 | 0.010505  |
| O  | 4.546126  | 9.973747  | 0.141489 | 0.044708  | -0.019420 | -0.010524 |
| O  | -2.092984 | 3.827853  | 6.225301 | -0.044354 | 0.019367  | 0.010463  |
| O  | 2.197450  | 3.933608  | 4.519003 | -0.014755 | -0.007524 | -0.033526 |

|   |           |           |          |           |           |           |
|---|-----------|-----------|----------|-----------|-----------|-----------|
| O | 0.255692  | 9.867992  | 1.847787 | 0.014819  | 0.007559  | 0.033744  |
| O | -1.898737 | 10.834409 | 5.031182 | -0.014814 | 0.007561  | -0.033752 |
| O | 4.351879  | 2.967192  | 1.335608 | 0.014769  | -0.007517 | 0.033529  |
| O | -0.212316 | 4.798696  | 5.055280 | -0.022664 | -0.013719 | 0.026391  |
| O | 2.665458  | 9.002905  | 1.311510 | 0.022813  | 0.013844  | -0.026609 |
| O | 0.511030  | 11.699496 | 4.494905 | -0.022829 | 0.013865  | 0.026593  |
| O | 1.942113  | 2.102105  | 1.871885 | 0.022647  | -0.013697 | -0.026385 |
| O | 0.525580  | 2.169271  | 5.472081 | -0.025707 | 0.011958  | 0.027419  |
| O | 1.927562  | 11.632329 | 0.894709 | 0.025864  | -0.012075 | -0.027612 |
| O | -0.226867 | 9.070071  | 4.078104 | -0.025859 | -0.012110 | 0.027625  |
| O | 2.680009  | 4.731529  | 2.288686 | 0.025694  | 0.011908  | -0.027406 |
| O | 0.058846  | 0.698526  | 2.444964 | 0.001274  | -0.001161 | 0.032771  |
| O | 2.394296  | 13.103075 | 3.921826 | -0.001206 | 0.001157  | -0.032978 |
| O | 4.548725  | 7.599326  | 0.738431 | 0.001218  | 0.001156  | 0.033007  |
| O | -2.095583 | 6.202275  | 5.628359 | -0.001281 | -0.001149 | -0.032771 |
| O | -2.459230 | 13.184059 | 5.445139 | -0.032217 | -0.002967 | 0.006356  |
| O | 4.912372  | 0.617542  | 0.921651 | 0.032007  | 0.002969  | -0.006202 |
| O | 2.757943  | 6.283259  | 4.105046 | -0.032006 | 0.002977  | 0.006193  |
| O | -0.304801 | 7.518342  | 2.261744 | 0.032227  | -0.002945 | -0.006329 |
| O | -0.175430 | 2.374756  | 0.744070 | 0.011604  | -0.006207 | 0.012118  |
| O | 2.628573  | 11.426844 | 5.622720 | -0.011670 | 0.006202  | -0.012198 |
| O | 4.783002  | 9.275557  | 2.439325 | 0.011678  | 0.006255  | 0.012181  |
| O | -2.329859 | 4.526044  | 3.927465 | -0.011592 | -0.006164 | -0.012140 |
| O | -1.223866 | 12.517207 | 2.155216 | -0.034196 | -0.002167 | -0.029590 |
| O | 3.677009  | 1.284394  | 4.211574 | 0.034410  | 0.002152  | 0.029770  |
| O | 5.831438  | 5.616407  | 1.028179 | -0.034372 | 0.002181  | -0.029738 |
| O | -3.378295 | 8.185194  | 5.338611 | 0.034194  | -0.002145 | 0.029599  |
| H | -0.637445 | 12.195109 | 2.878812 | -0.082905 | -0.034958 | -0.006612 |
| H | 3.090587  | 1.606491  | 3.487978 | 0.083185  | 0.035099  | 0.006828  |
| H | 5.245016  | 5.294309  | 0.304583 | -0.083148 | 0.035118  | -0.006781 |
| H | -2.791874 | 8.507292  | 6.062207 | 0.082904  | -0.034949 | 0.006635  |

137 f = 8.145723 THz 51.181084 2PiTHz 271.712048 cm-1 33.688013  
meV

X Y Z dx dy dz

|    |           |           |          |           |           |           |
|----|-----------|-----------|----------|-----------|-----------|-----------|
| Li | 3.769818  | 9.645336  | 4.001386 | -0.005832 | 0.019771  | 0.008074  |
| Li | -1.316675 | 4.156264  | 2.365404 | -0.006092 | 0.019821  | 0.007945  |
| Li | -3.471104 | 2.744536  | 5.548798 | 0.005890  | 0.019822  | -0.008088 |
| Li | 5.924247  | 11.057064 | 0.817991 | 0.006039  | 0.019759  | -0.007944 |
| Na | 2.049025  | 6.784862  | 1.629696 | 0.008311  | -0.070369 | 0.023540  |
| Na | 0.404117  | 7.016739  | 4.737094 | 0.008311  | -0.069684 | 0.023195  |
| Na | 2.558546  | 13.685662 | 1.553699 | -0.008363 | -0.070379 | -0.023326 |
| Na | -0.105403 | 0.115939  | 4.813091 | -0.008259 | -0.069678 | -0.023414 |
| B  | 4.155007  | 8.978944  | 1.168663 | 0.011091  | 0.015665  | -0.020088 |
| B  | -1.701865 | 4.822656  | 5.198127 | 0.011155  | 0.015806  | -0.020171 |
| B  | 0.452564  | 2.078144  | 2.014732 | -0.011156 | 0.015713  | 0.020200  |
| B  | 2.000578  | 11.723457 | 4.352058 | -0.011097 | 0.015750  | 0.020069  |
| B  | -2.733891 | 11.746082 | 5.839177 | 0.003659  | 0.011191  | 0.012697  |
| B  | 5.187034  | 2.055518  | 0.527613 | 0.003730  | 0.011267  | 0.012728  |
| B  | 3.032605  | 4.845282  | 3.711007 | -0.003695 | 0.011172  | -0.012705 |
| B  | -0.579463 | 8.956318  | 2.655782 | -0.003687 | 0.011283  | -0.012719 |
| B  | -0.983708 | 0.054306  | 1.827988 | -0.000484 | 0.015677  | 0.006263  |
| B  | 3.436850  | 13.747295 | 4.538802 | -0.000476 | 0.015655  | 0.006134  |
| B  | 5.591279  | 6.955106  | 1.355407 | 0.000424  | 0.015656  | -0.006191 |
| B  | -3.138137 | 6.846495  | 5.011383 | 0.000535  | 0.015685  | -0.006204 |
| Si | 0.631772  | 3.486686  | 4.508512 | -0.005401 | -0.006564 | 0.003725  |
| Si | 1.821370  | 10.314915 | 1.858278 | -0.005266 | -0.006688 | 0.003790  |
| Si | -0.333059 | 10.387486 | 5.041673 | 0.005382  | -0.006567 | -0.003703 |
| Si | 2.786201  | 3.414115  | 1.325117 | 0.005281  | -0.006688 | -0.003808 |
| O  | 0.061445  | 3.072947  | 3.041906 | -0.039087 | -0.005365 | 0.019957  |
| O  | 2.391697  | 10.728653 | 3.324884 | -0.038679 | -0.005234 | 0.019853  |
| O  | 4.546126  | 9.973747  | 0.141489 | 0.038914  | -0.005359 | -0.019880 |
| O  | -2.092984 | 3.827853  | 6.225301 | 0.038831  | -0.005223 | -0.019917 |
| O  | 2.197450  | 3.933608  | 4.519003 | -0.004724 | -0.001294 | -0.025488 |
| O  | 0.255692  | 9.867992  | 1.847787 | -0.004626 | -0.001225 | -0.025322 |
| O  | -1.898737 | 10.834409 | 5.031182 | 0.004699  | -0.001325 | 0.025533  |
| O  | 4.351879  | 2.967192  | 1.335608 | 0.004652  | -0.001187 | 0.025267  |
| O  | -0.212316 | 4.798696  | 5.055280 | 0.007298  | 0.014993  | -0.031020 |
| O  | 2.665458  | 9.002905  | 1.311510 | 0.007268  | 0.014756  | -0.030851 |
| O  | 0.511030  | 11.699496 | 4.494905 | -0.007272 | 0.014889  | 0.030824  |
| O  | 1.942113  | 2.102105  | 1.871885 | -0.007298 | 0.014851  | 0.031047  |

|   |           |           |          |           |           |           |
|---|-----------|-----------|----------|-----------|-----------|-----------|
| O | 0.525580  | 2.169271  | 5.472081 | -0.007114 | 0.003646  | 0.015026  |
| O | 1.927562  | 11.632329 | 0.894709 | -0.007339 | 0.003507  | 0.015015  |
| O | -0.226867 | 9.070071  | 4.078104 | 0.007213  | 0.003680  | -0.015026 |
| O | 2.680009  | 4.731529  | 2.288686 | 0.007248  | 0.003472  | -0.015013 |
| O | 0.058846  | 0.698526  | 2.444964 | -0.012343 | 0.015626  | 0.020343  |
| O | 2.394296  | 13.103075 | 3.921826 | -0.012373 | 0.015639  | 0.020243  |
| O | 4.548725  | 7.599326  | 0.738431 | 0.012217  | 0.015554  | -0.020196 |
| O | -2.095583 | 6.202275  | 5.628359 | 0.012490  | 0.015720  | -0.020373 |
| O | -2.459230 | 13.184059 | 5.445139 | 0.006125  | 0.014384  | 0.005458  |
| O | 4.912372  | 0.617542  | 0.921651 | 0.006075  | 0.014468  | 0.005650  |
| O | 2.757943  | 6.283259  | 4.105046 | -0.006076 | 0.014391  | -0.005502 |
| O | -0.304801 | 7.518342  | 2.261744 | -0.006116 | 0.014457  | -0.005600 |
| O | -0.175430 | 2.374756  | 0.744070 | 0.004013  | 0.025283  | 0.012207  |
| O | 2.628573  | 11.426844 | 5.622720 | 0.003932  | 0.025316  | 0.012121  |
| O | 4.783002  | 9.275557  | 2.439325 | -0.003956 | 0.025335  | -0.012170 |
| O | -2.329859 | 4.526044  | 3.927465 | -0.003982 | 0.025265  | -0.012156 |
| O | -1.223866 | 12.517207 | 2.155216 | 0.005257  | 0.007662  | -0.016906 |
| O | 3.677009  | 1.284394  | 4.211574 | 0.005061  | 0.007657  | -0.017082 |
| O | 5.831438  | 5.616407  | 1.028179 | -0.005220 | 0.007666  | 0.016935  |
| O | -3.378295 | 8.185194  | 5.338611 | -0.005095 | 0.007670  | 0.017030  |
| H | -0.637445 | 12.195109 | 2.878812 | -0.002562 | -0.002090 | -0.016660 |
| H | 3.090587  | 1.606491  | 3.487978 | -0.002882 | -0.002214 | -0.016810 |
| H | 5.245016  | 5.294309  | 0.304583 | 0.002638  | -0.002067 | 0.016656  |
| H | -2.791874 | 8.507292  | 6.062207 | 0.002800  | -0.002217 | 0.016797  |

138 f = 7.904810 THz 49.667385 2PiTHz 263.676066 cm-1 32.691677  
meV

|    | X         | Y         | Z        | dx       | dy        | dz        |
|----|-----------|-----------|----------|----------|-----------|-----------|
| Li | 3.769818  | 9.645336  | 4.001386 | 0.001840 | 0.020205  | -0.005423 |
| Li | -1.316675 | 4.156264  | 2.365404 | 0.001763 | 0.020214  | -0.005437 |
| Li | -3.471104 | 2.744536  | 5.548798 | 0.001849 | -0.020188 | -0.005387 |
| Li | 5.924247  | 11.057064 | 0.817991 | 0.001718 | -0.020228 | -0.005470 |
| Na | 2.049025  | 6.784862  | 1.629696 | 0.010100 | -0.074687 | 0.017095  |
| Na | 0.404117  | 7.016739  | 4.737094 | 0.010053 | -0.073987 | 0.017002  |
| Na | 2.558546  | 13.685662 | 1.553699 | 0.010184 | 0.074788  | 0.017091  |



|    |           |           |          |           |           |           |
|----|-----------|-----------|----------|-----------|-----------|-----------|
| Na | -0.105403 | 0.115939  | 4.813091 | 0.009974  | 0.073863  | 0.017007  |
| B  | 4.155007  | 8.978944  | 1.168663 | -0.005245 | 0.024957  | -0.002298 |
| B  | -1.701865 | 4.822656  | 5.198127 | -0.005085 | 0.025087  | -0.002366 |
| B  | 0.452564  | 2.078144  | 2.014732 | -0.005233 | -0.024978 | -0.002308 |
| B  | 2.000578  | 11.723457 | 4.352058 | -0.005090 | -0.025074 | -0.002379 |
| B  | -2.733891 | 11.746082 | 5.839177 | 0.001063  | -0.017235 | 0.001688  |
| B  | 5.187034  | 2.055518  | 0.527613 | 0.001041  | -0.017231 | 0.001589  |
| B  | 3.032605  | 4.845282  | 3.711007 | 0.001092  | 0.017217  | 0.001669  |
| B  | -0.579463 | 8.956318  | 2.655782 | 0.001052  | 0.017258  | 0.001585  |
| B  | -0.983708 | 0.054306  | 1.827988 | -0.011250 | -0.025206 | 0.008464  |
| B  | 3.436850  | 13.747295 | 4.538802 | -0.011234 | -0.025235 | 0.008438  |
| B  | 5.591279  | 6.955106  | 1.355407 | -0.011248 | 0.025216  | 0.008479  |
| B  | -3.138137 | 6.846495  | 5.011383 | -0.011226 | 0.025226  | 0.008423  |
| Si | 0.631772  | 3.486686  | 4.508512 | 0.003923  | 0.004714  | -0.012188 |
| Si | 1.821370  | 10.314915 | 1.858278 | 0.003947  | 0.004683  | -0.012249 |
| Si | -0.333059 | 10.387486 | 5.041673 | 0.003915  | -0.004700 | -0.012189 |
| Si | 2.786201  | 3.414115  | 1.325117 | 0.003954  | -0.004693 | -0.012258 |
| O  | 0.061445  | 3.072947  | 3.041906 | -0.004551 | -0.011169 | -0.007765 |
| O  | 2.391697  | 10.728653 | 3.324884 | -0.004271 | -0.011092 | -0.007928 |
| O  | 4.546126  | 9.973747  | 0.141489 | -0.004595 | 0.011155  | -0.007763 |
| O  | -2.092984 | 3.827853  | 6.225301 | -0.004258 | 0.011097  | -0.007931 |
| O  | 2.197450  | 3.933608  | 4.519003 | 0.006554  | 0.004573  | -0.004406 |
| O  | 0.255692  | 9.867992  | 1.847787 | 0.006534  | 0.004512  | -0.004630 |
| O  | -1.898737 | 10.834409 | 5.031182 | 0.006539  | -0.004573 | -0.004412 |
| O  | 4.351879  | 2.967192  | 1.335608 | 0.006551  | -0.004492 | -0.004597 |
| O  | -0.212316 | 4.798696  | 5.055280 | -0.003458 | 0.001307  | -0.011884 |
| O  | 2.665458  | 9.002905  | 1.311510 | -0.003617 | 0.000997  | -0.011711 |
| O  | 0.511030  | 11.699496 | 4.494905 | -0.003468 | -0.001289 | -0.011887 |
| O  | 1.942113  | 2.102105  | 1.871885 | -0.003606 | -0.001016 | -0.011753 |
| O  | 0.525580  | 2.169271  | 5.472081 | 0.010992  | 0.012526  | 0.000409  |
| O  | 1.927562  | 11.632329 | 0.894709 | 0.011009  | 0.012685  | 0.000526  |
| O  | -0.226867 | 9.070071  | 4.078104 | 0.011045  | -0.012489 | 0.000390  |
| O  | 2.680009  | 4.731529  | 2.288686 | 0.011012  | -0.012709 | 0.000523  |
| O  | 0.058846  | 0.698526  | 2.444964 | -0.011779 | -0.017702 | 0.011711  |
| O  | 2.394296  | 13.103075 | 3.921826 | -0.011854 | -0.017666 | 0.011808  |
| O  | 4.548725  | 7.599326  | 0.738431 | -0.011779 | 0.017681  | 0.011696  |

|   |           |           |          |           |           |           |
|---|-----------|-----------|----------|-----------|-----------|-----------|
| O | -2.095583 | 6.202275  | 5.628359 | -0.011880 | 0.017672  | 0.011862  |
| O | -2.459230 | 13.184059 | 5.445139 | -0.018293 | -0.015548 | 0.012100  |
| O | 4.912372  | 0.617542  | 0.921651 | -0.018396 | -0.015450 | 0.012255  |
| O | 2.757943  | 6.283259  | 4.105046 | -0.018241 | 0.015527  | 0.012063  |
| O | -0.304801 | 7.518342  | 2.261744 | -0.018393 | 0.015481  | 0.012253  |
| O | -0.175430 | 2.374756  | 0.744070 | 0.005483  | -0.050573 | -0.009250 |
| O | 2.628573  | 11.426844 | 5.622720 | 0.005525  | -0.050662 | -0.009252 |
| O | 4.783002  | 9.275557  | 2.439325 | 0.005482  | 0.050573  | -0.009247 |
| O | -2.329859 | 4.526044  | 3.927465 | 0.005556  | 0.050655  | -0.009253 |
| O | -1.223866 | 12.517207 | 2.155216 | 0.002890  | -0.025227 | 0.002539  |
| O | 3.677009  | 1.284394  | 4.211574 | 0.002982  | -0.025247 | 0.002558  |
| O | 5.831438  | 5.616407  | 1.028179 | 0.002931  | 0.025228  | 0.002612  |
| O | -3.378295 | 8.185194  | 5.338611 | 0.002935  | 0.025247  | 0.002475  |
| H | -0.637445 | 12.195109 | 2.878812 | 0.006570  | -0.016709 | 0.005258  |
| H | 3.090587  | 1.606491  | 3.487978 | 0.006533  | -0.016583 | 0.005455  |
| H | 5.245016  | 5.294309  | 0.304583 | 0.006641  | 0.016673  | 0.005325  |
| H | -2.791874 | 8.507292  | 6.062207 | 0.006436  | 0.016622  | 0.005392  |

139 f = 7.414221 THz 46.584922 2PiTHz 247.311770 cm-1 30.662763 meV

|    | X         | Y         | Z        | dx        | dy        | dz        |
|----|-----------|-----------|----------|-----------|-----------|-----------|
| Li | 3.769818  | 9.645336  | 4.001386 | -0.011777 | 0.018371  | -0.003262 |
| Li | -1.316675 | 4.156264  | 2.365404 | 0.012038  | -0.018191 | 0.003283  |
| Li | -3.471104 | 2.744536  | 5.548798 | -0.012039 | -0.018238 | -0.003255 |
| Li | 5.924247  | 11.057064 | 0.817991 | 0.011766  | 0.018329  | 0.003214  |
| Na | 2.049025  | 6.784862  | 1.629696 | -0.002479 | 0.008399  | -0.017237 |
| Na | 0.404117  | 7.016739  | 4.737094 | 0.002430  | -0.009250 | 0.016875  |
| Na | 2.558546  | 13.685662 | 1.553699 | -0.002431 | -0.009215 | -0.016846 |
| Na | -0.105403 | 0.115939  | 4.813091 | 0.002496  | 0.008411  | 0.017220  |
| B  | 4.155007  | 8.978944  | 1.168663 | 0.008814  | 0.002699  | -0.034111 |
| B  | -1.701865 | 4.822656  | 5.198127 | -0.008879 | -0.002558 | 0.034620  |
| B  | 0.452564  | 2.078144  | 2.014732 | 0.008879  | -0.002695 | -0.034618 |
| B  | 2.000578  | 11.723457 | 4.352058 | -0.008823 | 0.002664  | 0.034126  |
| B  | -2.733891 | 11.746082 | 5.839177 | 0.023600  | 0.001052  | -0.000342 |
| B  | 5.187034  | 2.055518  | 0.527613 | -0.024110 | -0.000931 | 0.000599  |

|    |           |           |          |           |           |           |
|----|-----------|-----------|----------|-----------|-----------|-----------|
| B  | 3.032605  | 4.845282  | 3.711007 | 0.024091  | -0.000794 | -0.000609 |
| B  | -0.579463 | 8.956318  | 2.655782 | -0.023587 | 0.001073  | 0.000334  |
| B  | -0.983708 | 0.054306  | 1.827988 | 0.007853  | -0.003151 | -0.012769 |
| B  | 3.436850  | 13.747295 | 4.538802 | -0.007836 | 0.003158  | 0.012678  |
| B  | 5.591279  | 6.955106  | 1.355407 | 0.007833  | 0.003187  | -0.012672 |
| B  | -3.138137 | 6.846495  | 5.011383 | -0.007939 | -0.003037 | 0.012845  |
| Si | 0.631772  | 3.486686  | 4.508512 | 0.006510  | 0.001003  | 0.007481  |
| Si | 1.821370  | 10.314915 | 1.858278 | -0.006595 | -0.000927 | -0.007435 |
| Si | -0.333059 | 10.387486 | 5.041673 | 0.006583  | -0.000943 | 0.007427  |
| Si | 2.786201  | 3.414115  | 1.325117 | -0.006470 | 0.000984  | -0.007524 |
| O  | 0.061445  | 3.072947  | 3.041906 | 0.040335  | -0.000545 | -0.009100 |
| O  | 2.391697  | 10.728653 | 3.324884 | -0.040176 | 0.000422  | 0.009040  |
| O  | 4.546126  | 9.973747  | 0.141489 | 0.040128  | 0.000450  | -0.009028 |
| O  | -2.092984 | 3.827853  | 6.225301 | -0.040252 | -0.000564 | 0.009014  |
| O  | 2.197450  | 3.933608  | 4.519003 | 0.011111  | -0.003512 | -0.003208 |
| O  | 0.255692  | 9.867992  | 1.847787 | -0.011088 | 0.003578  | 0.002543  |
| O  | -1.898737 | 10.834409 | 5.031182 | 0.011081  | 0.003563  | -0.002574 |
| O  | 4.351879  | 2.967192  | 1.335608 | -0.011046 | -0.003518 | 0.003161  |
| O  | -0.212316 | 4.798696  | 5.055280 | 0.003367  | -0.017372 | 0.065010  |
| O  | 2.665458  | 9.002905  | 1.311510 | -0.003238 | 0.017490  | -0.064260 |
| O  | 0.511030  | 11.699496 | 4.494905 | 0.003236  | 0.017472  | 0.064282  |
| O  | 1.942113  | 2.102105  | 1.871885 | -0.003340 | -0.017436 | -0.065076 |
| O  | 0.525580  | 2.169271  | 5.472081 | -0.030229 | -0.003211 | 0.000624  |
| O  | 1.927562  | 11.632329 | 0.894709 | 0.029245  | 0.003453  | -0.000333 |
| O  | -0.226867 | 9.070071  | 4.078104 | -0.029211 | 0.003451  | 0.000321  |
| O  | 2.680009  | 4.731529  | 2.288686 | 0.030271  | -0.003192 | -0.000667 |
| O  | 0.058846  | 0.698526  | 2.444964 | 0.034829  | -0.011789 | -0.053627 |
| O  | 2.394296  | 13.103075 | 3.921826 | -0.034246 | 0.011545  | 0.052812  |
| O  | 4.548725  | 7.599326  | 0.738431 | 0.034256  | 0.011590  | -0.052804 |
| O  | -2.095583 | 6.202275  | 5.628359 | -0.034943 | -0.011707 | 0.053773  |
| O  | -2.459230 | 13.184059 | 5.445139 | 0.017865  | 0.003174  | -0.011431 |
| O  | 4.912372  | 0.617542  | 0.921651 | -0.018463 | -0.003003 | 0.011997  |
| O  | 2.757943  | 6.283259  | 4.105046 | 0.018309  | -0.002893 | -0.011885 |
| O  | -0.304801 | 7.518342  | 2.261744 | -0.017851 | 0.003194  | 0.011423  |
| O  | -0.175430 | 2.374756  | 0.744070 | -0.027365 | 0.013571  | -0.013168 |
| O  | 2.628573  | 11.426844 | 5.622720 | 0.026904  | -0.013427 | 0.012939  |

|   |           |           |          |           |           |           |
|---|-----------|-----------|----------|-----------|-----------|-----------|
| O | 4.783002  | 9.275557  | 2.439325 | -0.026893 | -0.013394 | -0.012932 |
| O | -2.329859 | 4.526044  | 3.927465 | 0.027393  | 0.013931  | 0.013119  |
| O | -1.223866 | 12.517207 | 2.155216 | 0.013361  | 0.000762  | 0.010639  |
| O | 3.677009  | 1.284394  | 4.211574 | -0.013300 | -0.000717 | -0.010551 |
| O | 5.831438  | 5.616407  | 1.028179 | 0.013265  | -0.000696 | 0.010562  |
| O | -3.378295 | 8.185194  | 5.338611 | -0.013311 | 0.000923  | -0.010655 |
| H | -0.637445 | 12.195109 | 2.878812 | 0.020947  | 0.012759  | 0.008647  |
| H | 3.090587  | 1.606491  | 3.487978 | -0.020406 | -0.012745 | -0.008936 |
| H | 5.245016  | 5.294309  | 0.304583 | 0.020371  | -0.012713 | 0.008940  |
| H | -2.791874 | 8.507292  | 6.062207 | -0.020868 | 0.012887  | -0.008672 |

140 f = 7.378500 THz 46.360485 2PiTHz 246.120274 cm-1 30.515036 meV

|    | X         | Y         | Z        | dx        | dy        | dz        |
|----|-----------|-----------|----------|-----------|-----------|-----------|
| Li | 3.769818  | 9.645336  | 4.001386 | -0.015719 | -0.005086 | 0.000246  |
| Li | -1.316675 | 4.156264  | 2.365404 | -0.015021 | -0.005447 | 0.000675  |
| Li | -3.471104 | 2.744536  | 5.548798 | 0.015484  | -0.005447 | -0.000318 |
| Li | 5.924247  | 11.057064 | 0.817991 | 0.015275  | -0.005084 | -0.000641 |
| Na | 2.049025  | 6.784862  | 1.629696 | 0.005288  | 0.026745  | 0.002526  |
| Na | 0.404117  | 7.016739  | 4.737094 | 0.005431  | 0.025199  | 0.003284  |
| Na | 2.558546  | 13.685662 | 1.553699 | -0.005317 | 0.026705  | -0.002754 |
| Na | -0.105403 | 0.115939  | 4.813091 | -0.005387 | 0.025422  | -0.002992 |
| B  | 4.155007  | 8.978944  | 1.168663 | 0.003688  | -0.000858 | -0.029098 |
| B  | -1.701865 | 4.822656  | 5.198127 | 0.003557  | -0.000917 | -0.028471 |
| B  | 0.452564  | 2.078144  | 2.014732 | -0.003533 | -0.000918 | 0.028446  |
| B  | 2.000578  | 11.723457 | 4.352058 | -0.003719 | -0.000869 | 0.029127  |
| B  | -2.733891 | 11.746082 | 5.839177 | 0.029107  | -0.006556 | -0.013167 |
| B  | 5.187034  | 2.055518  | 0.527613 | 0.028570  | -0.006852 | -0.013176 |
| B  | 3.032605  | 4.845282  | 3.711007 | -0.028613 | -0.006607 | 0.013156  |
| B  | -0.579463 | 8.956318  | 2.655782 | -0.029030 | -0.006834 | 0.013190  |
| B  | -0.983708 | 0.054306  | 1.827988 | -0.000357 | -0.001945 | 0.003544  |
| B  | 3.436850  | 13.747295 | 4.538802 | -0.000268 | -0.001801 | 0.003853  |
| B  | 5.591279  | 6.955106  | 1.355407 | 0.000490  | -0.001875 | -0.003816 |
| B  | -3.138137 | 6.846495  | 5.011383 | 0.000135  | -0.001858 | -0.003640 |
| Si | 0.631772  | 3.486686  | 4.508512 | 0.003425  | -0.001789 | -0.004070 |

|    |           |           |          |           |           |           |
|----|-----------|-----------|----------|-----------|-----------|-----------|
| Si | 1.821370  | 10.314915 | 1.858278 | 0.002996  | -0.001699 | -0.004390 |
| Si | -0.333059 | 10.387486 | 5.041673 | -0.003290 | -0.001819 | 0.004234  |
| Si | 2.786201  | 3.414115  | 1.325117 | -0.003124 | -0.001686 | 0.004226  |
| O  | 0.061445  | 3.072947  | 3.041906 | -0.013496 | 0.004248  | 0.004150  |
| O  | 2.391697  | 10.728653 | 3.324884 | -0.014968 | 0.003986  | 0.004431  |
| O  | 4.546126  | 9.973747  | 0.141489 | 0.014257  | 0.004299  | -0.004283 |
| O  | -2.092984 | 3.827853  | 6.225301 | 0.014163  | 0.003999  | -0.004252 |
| O  | 2.197450  | 3.933608  | 4.519003 | -0.000375 | -0.004218 | 0.026966  |
| O  | 0.255692  | 9.867992  | 1.847787 | -0.000844 | -0.004395 | 0.026490  |
| O  | -1.898737 | 10.834409 | 5.031182 | 0.000590  | -0.004174 | -0.026991 |
| O  | 4.351879  | 2.967192  | 1.335608 | 0.000627  | -0.004452 | -0.026458 |
| O  | -0.212316 | 4.798696  | 5.055280 | -0.006007 | -0.000217 | -0.045112 |
| O  | 2.665458  | 9.002905  | 1.311510 | -0.006129 | 0.000166  | -0.046159 |
| O  | 0.511030  | 11.699496 | 4.494905 | 0.006074  | 0.000115  | 0.046369  |
| O  | 1.942113  | 2.102105  | 1.871885 | 0.006057  | -0.000155 | 0.044933  |
| O  | 0.525580  | 2.169271  | 5.472081 | 0.051138  | -0.008557 | -0.014190 |
| O  | 1.927562  | 11.632329 | 0.894709 | 0.051975  | -0.008264 | -0.014202 |
| O  | -0.226867 | 9.070071  | 4.078104 | -0.051692 | -0.008499 | 0.014207  |
| O  | 2.680009  | 4.731529  | 2.288686 | -0.051385 | -0.008374 | 0.014206  |
| O  | 0.058846  | 0.698526  | 2.444964 | -0.031875 | 0.009487  | 0.047200  |
| O  | 2.394296  | 13.103075 | 3.921826 | -0.032071 | 0.009623  | 0.047989  |
| O  | 4.548725  | 7.599326  | 0.738431 | 0.032538  | 0.009731  | -0.048262 |
| O  | -2.095583 | 6.202275  | 5.628359 | 0.031428  | 0.009416  | -0.046989 |
| O  | -2.459230 | 13.184059 | 5.445139 | 0.035130  | -0.010093 | -0.033359 |
| O  | 4.912372  | 0.617542  | 0.921651 | 0.034603  | -0.010366 | -0.033313 |
| O  | 2.757943  | 6.283259  | 4.105046 | -0.034726 | -0.010165 | 0.033075  |
| O  | -0.304801 | 7.518342  | 2.261744 | -0.034973 | -0.010327 | 0.033539  |
| O  | -0.175430 | 2.374756  | 0.744070 | 0.026466  | -0.011419 | 0.013035  |
| O  | 2.628573  | 11.426844 | 5.622720 | 0.026991  | -0.011298 | 0.013393  |
| O  | 4.783002  | 9.275557  | 2.439325 | -0.026989 | -0.011698 | -0.013272 |
| O  | -2.329859 | 4.526044  | 3.927465 | -0.026445 | -0.011082 | -0.013144 |
| O  | -1.223866 | 12.517207 | 2.155216 | -0.006505 | -0.004866 | -0.011514 |
| O  | 3.677009  | 1.284394  | 4.211574 | -0.006444 | -0.004734 | -0.011400 |
| O  | 5.831438  | 5.616407  | 1.028179 | 0.006730  | -0.004878 | 0.011682  |
| O  | -3.378295 | 8.185194  | 5.338611 | 0.006138  | -0.004730 | 0.011168  |
| H  | -0.637445 | 12.195109 | 2.878812 | -0.036136 | -0.004523 | 0.010703  |

|   |           |          |          |           |           |           |
|---|-----------|----------|----------|-----------|-----------|-----------|
| H | 3.090587  | 1.606491 | 3.487978 | -0.036081 | -0.004390 | 0.010876  |
| H | 5.245016  | 5.294309 | 0.304583 | 0.036489  | -0.004758 | -0.010563 |
| H | -2.791874 | 8.507292 | 6.062207 | 0.035601  | -0.004151 | -0.011047 |

141 f = 7.279511 THz 45.738516 2PiTHz 242.818339 cm-1 30.105648 meV

|    | X         | Y         | Z        | dx        | dy        | dz        |
|----|-----------|-----------|----------|-----------|-----------|-----------|
| Li | 3.769818  | 9.645336  | 4.001386 | 0.014970  | -0.001661 | 0.024376  |
| Li | -1.316675 | 4.156264  | 2.365404 | -0.015107 | 0.001363  | -0.024586 |
| Li | -3.471104 | 2.744536  | 5.548798 | -0.014957 | -0.001688 | -0.024405 |
| Li | 5.924247  | 11.057064 | 0.817991 | 0.015134  | 0.001419  | 0.024574  |
| Na | 2.049025  | 6.784862  | 1.629696 | 0.001755  | -0.052472 | 0.024702  |
| Na | 0.404117  | 7.016739  | 4.737094 | -0.001678 | 0.052951  | -0.024715 |
| Na | 2.558546  | 13.685662 | 1.553699 | -0.001804 | -0.052439 | -0.024630 |
| Na | -0.105403 | 0.115939  | 4.813091 | 0.001674  | 0.053146  | 0.024890  |
| B  | 4.155007  | 8.978944  | 1.168663 | 0.001640  | 0.013392  | -0.000249 |
| B  | -1.701865 | 4.822656  | 5.198127 | -0.001738 | -0.013412 | -0.000047 |
| B  | 0.452564  | 2.078144  | 2.014732 | -0.001618 | 0.013367  | 0.000173  |
| B  | 2.000578  | 11.723457 | 4.352058 | 0.001709  | -0.013420 | 0.000110  |
| B  | -2.733891 | 11.746082 | 5.839177 | -0.003072 | -0.021781 | -0.002579 |
| B  | 5.187034  | 2.055518  | 0.527613 | 0.003635  | 0.021636  | 0.002151  |
| B  | 3.032605  | 4.845282  | 3.711007 | 0.003119  | -0.021831 | 0.002588  |
| B  | -0.579463 | 8.956318  | 2.655782 | -0.003647 | 0.021616  | -0.002157 |
| B  | -0.983708 | 0.054306  | 1.827988 | 0.019504  | 0.012582  | -0.003962 |
| B  | 3.436850  | 13.747295 | 4.538802 | -0.019350 | -0.012690 | 0.003831  |
| B  | 5.591279  | 6.955106  | 1.355407 | -0.019461 | 0.012607  | 0.003885  |
| B  | -3.138137 | 6.846495  | 5.011383 | 0.019326  | -0.012689 | -0.003858 |
| Si | 0.631772  | 3.486686  | 4.508512 | -0.016529 | 0.001205  | -0.001617 |
| Si | 1.821370  | 10.314915 | 1.858278 | 0.016672  | -0.001206 | 0.001590  |
| Si | -0.333059 | 10.387486 | 5.041673 | 0.016545  | 0.001197  | 0.001607  |
| Si | 2.786201  | 3.414115  | 1.325117 | -0.016680 | -0.001232 | -0.001614 |
| O  | 0.061445  | 3.072947  | 3.041906 | -0.036752 | -0.013400 | 0.013347  |
| O  | 2.391697  | 10.728653 | 3.324884 | 0.036883  | 0.013481  | -0.013348 |
| O  | 4.546126  | 9.973747  | 0.141489 | 0.036815  | -0.013350 | -0.013361 |
| O  | -2.092984 | 3.827853  | 6.225301 | -0.037003 | 0.013557  | 0.013407  |

|   |           |           |          |           |           |           |
|---|-----------|-----------|----------|-----------|-----------|-----------|
| O | 2.197450  | 3.933608  | 4.519003 | -0.018051 | -0.006009 | -0.011789 |
| O | 0.255692  | 9.867992  | 1.847787 | 0.018142  | 0.005918  | 0.012614  |
| O | -1.898737 | 10.834409 | 5.031182 | 0.018074  | -0.005990 | 0.011807  |
| O | 4.351879  | 2.967192  | 1.335608 | -0.018165 | 0.005877  | -0.012593 |
| O | -0.212316 | 4.798696  | 5.055280 | -0.005925 | -0.005926 | 0.014826  |
| O | 2.665458  | 9.002905  | 1.311510 | 0.005739  | 0.005730  | -0.015204 |
| O | 0.511030  | 11.699496 | 4.494905 | 0.005913  | -0.005866 | -0.014718 |
| O | 1.942113  | 2.102105  | 1.871885 | -0.005745 | 0.005670  | 0.015057  |
| O | 0.525580  | 2.169271  | 5.472081 | 0.003351  | 0.009016  | 0.004644  |
| O | 1.927562  | 11.632329 | 0.894709 | -0.002272 | -0.009292 | -0.005097 |
| O | -0.226867 | 9.070071  | 4.078104 | -0.003399 | 0.008960  | -0.004628 |
| O | 2.680009  | 4.731529  | 2.288686 | 0.002322  | -0.009371 | 0.005123  |
| O | 0.058846  | 0.698526  | 2.444964 | 0.033246  | 0.002854  | -0.026270 |
| O | 2.394296  | 13.103075 | 3.921826 | -0.033483 | -0.002824 | 0.026702  |
| O | 4.548725  | 7.599326  | 0.738431 | -0.033164 | 0.002912  | 0.026153  |
| O | -2.095583 | 6.202275  | 5.628359 | 0.033449  | -0.002786 | -0.026663 |
| O | -2.459230 | 13.184059 | 5.445139 | -0.023515 | -0.015580 | 0.004301  |
| O | 4.912372  | 0.617542  | 0.921651 | 0.024404  | 0.015319  | -0.005203 |
| O | 2.757943  | 6.283259  | 4.105046 | 0.023539  | -0.015630 | -0.004335 |
| O | -0.304801 | 7.518342  | 2.261744 | -0.024370 | 0.015322  | 0.005158  |
| O | -0.175430 | 2.374756  | 0.744070 | -0.004354 | 0.051352  | 0.008855  |
| O | 2.628573  | 11.426844 | 5.622720 | 0.004753  | -0.051274 | -0.008641 |
| O | 4.783002  | 9.275557  | 2.439325 | 0.004323  | 0.051288  | -0.008882 |
| O | -2.329859 | 4.526044  | 3.927465 | -0.004704 | -0.051298 | 0.008680  |
| O | -1.223866 | 12.517207 | 2.155216 | 0.006314  | 0.021850  | 0.021064  |
| O | 3.677009  | 1.284394  | 4.211574 | -0.006669 | -0.021822 | -0.021039 |
| O | 5.831438  | 5.616407  | 1.028179 | -0.006300 | 0.021859  | -0.021106 |
| O | -3.378295 | 8.185194  | 5.338611 | 0.006580  | -0.021821 | 0.020957  |
| H | -0.637445 | 12.195109 | 2.878812 | 0.010629  | 0.026833  | 0.020855  |
| H | 3.090587  | 1.606491  | 3.487978 | -0.011483 | -0.026818 | -0.020450 |
| H | 5.245016  | 5.294309  | 0.304583 | -0.010634 | 0.026801  | -0.020864 |
| H | -2.791874 | 8.507292  | 6.062207 | 0.011366  | -0.026786 | 0.020379  |

142 f = 7.145537 THz 44.896733 2PiTHz 238.349450 cm-1 29.551576 meV

|    | X         | Y         | Z        | dx        | dy        | dz        |
|----|-----------|-----------|----------|-----------|-----------|-----------|
| Li | 3.769818  | 9.645336  | 4.001386 | -0.021298 | -0.001822 | 0.003636  |
| Li | -1.316675 | 4.156264  | 2.365404 | 0.021238  | 0.002152  | -0.003146 |
| Li | -3.471104 | 2.744536  | 5.548798 | 0.021288  | -0.001946 | -0.003599 |
| Li | 5.924247  | 11.057064 | 0.817991 | -0.021246 | 0.002266  | 0.003135  |
| Na | 2.049025  | 6.784862  | 1.629696 | -0.008915 | 0.055543  | -0.014984 |
| Na | 0.404117  | 7.016739  | 4.737094 | 0.008782  | -0.055448 | 0.015098  |
| Na | 2.558546  | 13.685662 | 1.553699 | 0.008937  | 0.055310  | 0.014884  |
| Na | -0.105403 | 0.115939  | 4.813091 | -0.008659 | -0.055457 | -0.015055 |
| B  | 4.155007  | 8.978944  | 1.168663 | 0.000045  | 0.022613  | 0.001787  |
| B  | -1.701865 | 4.822656  | 5.198127 | 0.000233  | -0.022708 | -0.001797 |
| B  | 0.452564  | 2.078144  | 2.014732 | 0.000025  | 0.022605  | -0.001829 |
| B  | 2.000578  | 11.723457 | 4.352058 | -0.000292 | -0.022685 | 0.001850  |
| B  | -2.733891 | 11.746082 | 5.839177 | -0.000952 | -0.011354 | -0.000986 |
| B  | 5.187034  | 2.055518  | 0.527613 | 0.000450  | 0.011481  | 0.001557  |
| B  | 3.032605  | 4.845282  | 3.711007 | 0.000872  | -0.011354 | 0.001081  |
| B  | -0.579463 | 8.956318  | 2.655782 | -0.000402 | 0.011497  | -0.001645 |
| B  | -0.983708 | 0.054306  | 1.827988 | 0.008473  | 0.013253  | -0.014667 |
| B  | 3.436850  | 13.747295 | 4.538802 | -0.008904 | -0.013194 | 0.015046  |
| B  | 5.591279  | 6.955106  | 1.355407 | -0.008398 | 0.013255  | 0.014578  |
| B  | -3.138137 | 6.846495  | 5.011383 | 0.008822  | -0.013226 | -0.014900 |
| Si | 0.631772  | 3.486686  | 4.508512 | 0.002400  | -0.004668 | 0.014148  |
| Si | 1.821370  | 10.314915 | 1.858278 | -0.002541 | 0.004638  | -0.014235 |
| Si | -0.333059 | 10.387486 | 5.041673 | -0.002356 | -0.004650 | -0.014134 |
| Si | 2.786201  | 3.414115  | 1.325117 | 0.002478  | 0.004642  | 0.014237  |
| O  | 0.061445  | 3.072947  | 3.041906 | 0.010255  | 0.006754  | 0.010853  |
| O  | 2.391697  | 10.728653 | 3.324884 | -0.010627 | -0.006845 | -0.010869 |
| O  | 4.546126  | 9.973747  | 0.141489 | -0.010108 | 0.006723  | -0.010889 |
| O  | -2.092984 | 3.827853  | 6.225301 | 0.010520  | -0.006883 | 0.010868  |
| O  | 2.197450  | 3.933608  | 4.519003 | -0.004474 | 0.016069  | 0.033985  |
| O  | 0.255692  | 9.867992  | 1.847787 | 0.004281  | -0.015883 | -0.034851 |
| O  | -1.898737 | 10.834409 | 5.031182 | 0.004525  | 0.016132  | -0.033871 |
| O  | 4.351879  | 2.967192  | 1.335608 | -0.004341 | -0.015912 | 0.034717  |
| O  | -0.212316 | 4.798696  | 5.055280 | -0.004077 | -0.010490 | 0.005978  |
| O  | 2.665458  | 9.002905  | 1.311510 | 0.004280  | 0.010718  | -0.006148 |
| O  | 0.511030  | 11.699496 | 4.494905 | 0.004045  | -0.010394 | -0.005870 |



|   |           |           |          |           |           |           |
|---|-----------|-----------|----------|-----------|-----------|-----------|
| O | 1.942113  | 2.102105  | 1.871885 | -0.004234 | 0.010606  | 0.006049  |
| O | 0.525580  | 2.169271  | 5.472081 | -0.023349 | -0.000738 | 0.010042  |
| O | 1.927562  | 11.632329 | 0.894709 | 0.022440  | 0.001135  | -0.009470 |
| O | -0.226867 | 9.070071  | 4.078104 | 0.023493  | -0.000642 | -0.010141 |
| O | 2.680009  | 4.731529  | 2.288686 | -0.022602 | 0.001112  | 0.009553  |
| O | 0.058846  | 0.698526  | 2.444964 | 0.008122  | 0.013302  | -0.020390 |
| O | 2.394296  | 13.103075 | 3.921826 | -0.008501 | -0.013255 | 0.020699  |
| O | 4.548725  | 7.599326  | 0.738431 | -0.008067 | 0.013308  | 0.020314  |
| O | -2.095583 | 6.202275  | 5.628359 | 0.008428  | -0.013296 | -0.020567 |
| O | -2.459230 | 13.184059 | 5.445139 | -0.029526 | -0.004059 | 0.034492  |
| O | 4.912372  | 0.617542  | 0.921651 | 0.028313  | 0.004364  | -0.033261 |
| O | 2.757943  | 6.283259  | 4.105046 | 0.029340  | -0.004111 | -0.034247 |
| O | -0.304801 | 7.518342  | 2.261744 | -0.028150 | 0.004423  | 0.033065  |
| O | -0.175430 | 2.374756  | 0.744070 | -0.006235 | 0.051880  | 0.004457  |
| O | 2.628573  | 11.426844 | 5.622720 | 0.006067  | -0.052543 | -0.004686 |
| O | 4.783002  | 9.275557  | 2.439325 | 0.006237  | 0.051784  | -0.004440 |
| O | -2.329859 | 4.526044  | 3.927465 | -0.006085 | -0.052406 | 0.004672  |
| O | -1.223866 | 12.517207 | 2.155216 | -0.027583 | 0.023806  | 0.004586  |
| O | 3.677009  | 1.284394  | 4.211574 | 0.028200  | -0.024155 | -0.005072 |
| O | 5.831438  | 5.616407  | 1.028179 | 0.027557  | 0.023772  | -0.004575 |
| O | -3.378295 | 8.185194  | 5.338611 | -0.028161 | -0.024134 | 0.005109  |
| H | -0.637445 | 12.195109 | 2.878812 | -0.035037 | 0.008600  | 0.002560  |
| H | 3.090587  | 1.606491  | 3.487978 | 0.035978  | -0.008856 | -0.003260 |
| H | 5.245016  | 5.294309  | 0.304583 | 0.034970  | 0.008549  | -0.002512 |
| H | -2.791874 | 8.507292  | 6.062207 | -0.035898 | -0.008800 | 0.003249  |

143 f = 7.016710 THz 44.087291 2PiTHz 234.052256 cm-1 29.018792 meV

|    | X         | Y         | Z        | dx        | dy        | dz        |
|----|-----------|-----------|----------|-----------|-----------|-----------|
| Li | 3.769818  | 9.645336  | 4.001386 | 0.000503  | 0.022892  | 0.007126  |
| Li | -1.316675 | 4.156264  | 2.365404 | 0.000113  | -0.023302 | -0.008435 |
| Li | -3.471104 | 2.744536  | 5.548798 | -0.000115 | -0.023468 | 0.008460  |
| Li | 5.924247  | 11.057064 | 0.817991 | -0.000375 | 0.022666  | -0.007166 |
| Na | 2.049025  | 6.784862  | 1.629696 | -0.012788 | 0.027732  | -0.012593 |
| Na | 0.404117  | 7.016739  | 4.737094 | 0.013500  | -0.028821 | 0.012341  |

|    |           |           |          |           |           |           |
|----|-----------|-----------|----------|-----------|-----------|-----------|
| Na | 2.558546  | 13.685662 | 1.553699 | -0.013556 | -0.029424 | -0.012527 |
| Na | -0.105403 | 0.115939  | 4.813091 | 0.012799  | 0.027449  | 0.012485  |
| B  | 4.155007  | 8.978944  | 1.168663 | 0.015267  | 0.004806  | 0.000249  |
| B  | -1.701865 | 4.822656  | 5.198127 | -0.015876 | -0.003910 | 0.000094  |
| B  | 0.452564  | 2.078144  | 2.014732 | 0.015899  | -0.004355 | -0.000038 |
| B  | 2.000578  | 11.723457 | 4.352058 | -0.015255 | 0.004540  | -0.000208 |
| B  | -2.733891 | 11.746082 | 5.839177 | -0.022964 | 0.002256  | 0.020494  |
| B  | 5.187034  | 2.055518  | 0.527613 | 0.023536  | -0.002606 | -0.021369 |
| B  | 3.032605  | 4.845282  | 3.711007 | -0.023590 | -0.002158 | 0.021334  |
| B  | -0.579463 | 8.956318  | 2.655782 | 0.022896  | 0.002592  | -0.020493 |
| B  | -0.983708 | 0.054306  | 1.827988 | 0.018683  | -0.003585 | -0.023821 |
| B  | 3.436850  | 13.747295 | 4.538802 | -0.017645 | 0.003341  | 0.023090  |
| B  | 5.591279  | 6.955106  | 1.355407 | 0.017493  | 0.003596  | -0.022871 |
| B  | -3.138137 | 6.846495  | 5.011383 | -0.018930 | -0.003212 | 0.024102  |
| Si | 0.631772  | 3.486686  | 4.508512 | 0.011426  | -0.001353 | 0.000806  |
| Si | 1.821370  | 10.314915 | 1.858278 | -0.011023 | 0.001487  | -0.000341 |
| Si | -0.333059 | 10.387486 | 5.041673 | 0.011082  | 0.001511  | 0.000356  |
| Si | 2.786201  | 3.414115  | 1.325117 | -0.011339 | -0.001390 | -0.000892 |
| O  | 0.061445  | 3.072947  | 3.041906 | 0.024728  | 0.001257  | -0.002305 |
| O  | 2.391697  | 10.728653 | 3.324884 | -0.023840 | -0.001244 | 0.002613  |
| O  | 4.546126  | 9.973747  | 0.141489 | 0.023998  | -0.001255 | -0.002718 |
| O  | -2.092984 | 3.827853  | 6.225301 | -0.024560 | 0.001263  | 0.002103  |
| O  | 2.197450  | 3.933608  | 4.519003 | 0.009718  | -0.007568 | 0.033394  |
| O  | 0.255692  | 9.867992  | 1.847787 | -0.008946 | 0.007053  | -0.032437 |
| O  | -1.898737 | 10.834409 | 5.031182 | 0.009043  | 0.006960  | 0.032454  |
| O  | 4.351879  | 2.967192  | 1.335608 | -0.009553 | -0.007597 | -0.033602 |
| O  | -0.212316 | 4.798696  | 5.055280 | -0.013791 | -0.022127 | 0.007351  |
| O  | 2.665458  | 9.002905  | 1.311510 | 0.013699  | 0.022116  | -0.006409 |
| O  | 0.511030  | 11.699496 | 4.494905 | -0.013646 | 0.021980  | 0.006291  |
| O  | 1.942113  | 2.102105  | 1.871885 | 0.013892  | -0.022358 | -0.007513 |
| O  | 0.525580  | 2.169271  | 5.472081 | 0.048017  | -0.013695 | -0.021762 |
| O  | 1.927562  | 11.632329 | 0.894709 | -0.046723 | 0.012813  | 0.020830  |
| O  | -0.226867 | 9.070071  | 4.078104 | 0.046726  | 0.012997  | -0.020896 |
| O  | 2.680009  | 4.731529  | 2.288686 | -0.047804 | -0.013520 | 0.021599  |
| O  | 0.058846  | 0.698526  | 2.444964 | 0.005498  | -0.002243 | -0.005109 |
| O  | 2.394296  | 13.103075 | 3.921826 | -0.004062 | 0.001836  | 0.003829  |

|   |           |           |          |           |           |           |
|---|-----------|-----------|----------|-----------|-----------|-----------|
| O | 4.548725  | 7.599326  | 0.738431 | 0.003855  | 0.002025  | -0.003509 |
| O | -2.095583 | 6.202275  | 5.628359 | -0.005834 | -0.001953 | 0.005591  |
| O | -2.459230 | 13.184059 | 5.445139 | -0.047769 | 0.012574  | 0.055306  |
| O | 4.912372  | 0.617542  | 0.921651 | 0.050037  | -0.013360 | -0.057440 |
| O | 2.757943  | 6.283259  | 4.105046 | -0.050495 | -0.012966 | 0.057814  |
| O | -0.304801 | 7.518342  | 2.261744 | 0.047541  | 0.012913  | -0.055124 |
| O | -0.175430 | 2.374756  | 0.744070 | 0.012152  | 0.020431  | 0.009610  |
| O | 2.628573  | 11.426844 | 5.622720 | -0.012326 | -0.018669 | -0.009024 |
| O | 4.783002  | 9.275557  | 2.439325 | 0.012363  | -0.017956 | 0.008939  |
| O | -2.329859 | 4.526044  | 3.927465 | -0.012049 | 0.021568  | -0.009740 |
| O | -1.223866 | 12.517207 | 2.155216 | -0.009730 | 0.005573  | -0.007563 |
| O | 3.677009  | 1.284394  | 4.211574 | 0.008466  | -0.004879 | 0.009099  |
| O | 5.831438  | 5.616407  | 1.028179 | -0.008446 | -0.004549 | -0.008988 |
| O | -3.378295 | 8.185194  | 5.338611 | 0.009913  | 0.006113  | 0.007533  |
| H | -0.637445 | 12.195109 | 2.878812 | -0.023306 | 0.007388  | 0.004399  |
| H | 3.090587  | 1.606491  | 3.487978 | 0.021961  | -0.006999 | -0.002928 |
| H | 5.245016  | 5.294309  | 0.304583 | -0.021850 | -0.006638 | 0.002950  |
| H | -2.791874 | 8.507292  | 6.062207 | 0.023589  | 0.007858  | -0.004474 |

144 f = 7.004460 THz 44.010319 2PiTHz 233.643622 cm-1 28.968128 meV

|    | X         | Y         | Z        | dx        | dy        | dz        |
|----|-----------|-----------|----------|-----------|-----------|-----------|
| Li | 3.769818  | 9.645336  | 4.001386 | -0.009801 | 0.011318  | 0.024540  |
| Li | -1.316675 | 4.156264  | 2.365404 | -0.010340 | 0.009898  | 0.023927  |
| Li | -3.471104 | 2.744536  | 5.548798 | 0.009796  | 0.009925  | -0.024058 |
| Li | 5.924247  | 11.057064 | 0.817991 | 0.010326  | 0.011256  | -0.024393 |
| Na | 2.049025  | 6.784862  | 1.629696 | -0.011640 | 0.026137  | -0.001646 |
| Na | 0.404117  | 7.016739  | 4.737094 | -0.011250 | 0.026401  | -0.001764 |
| Na | 2.558546  | 13.685662 | 1.553699 | 0.011068  | 0.024967  | 0.001217  |
| Na | -0.105403 | 0.115939  | 4.813091 | 0.011839  | 0.027580  | 0.002191  |
| B  | 4.155007  | 8.978944  | 1.168663 | 0.012174  | -0.009759 | -0.006341 |
| B  | -1.701865 | 4.822656  | 5.198127 | 0.011289  | -0.009562 | -0.006275 |
| B  | 0.452564  | 2.078144  | 2.014732 | -0.011313 | -0.009909 | 0.006304  |
| B  | 2.000578  | 11.723457 | 4.352058 | -0.012153 | -0.009388 | 0.006302  |
| B  | -2.733891 | 11.746082 | 5.839177 | -0.011938 | -0.000124 | 0.016657  |

|    |           |           |          |           |           |           |
|----|-----------|-----------|----------|-----------|-----------|-----------|
| B  | 5.187034  | 2.055518  | 0.527613 | -0.010677 | -0.000357 | 0.015409  |
| B  | 3.032605  | 4.845282  | 3.711007 | 0.010675  | -0.000269 | -0.015422 |
| B  | -0.579463 | 8.956318  | 2.655782 | 0.011915  | -0.000233 | -0.016631 |
| B  | -0.983708 | 0.054306  | 1.827988 | -0.021930 | -0.001445 | 0.016971  |
| B  | 3.436850  | 13.747295 | 4.538802 | -0.022986 | -0.001087 | 0.018044  |
| B  | 5.591279  | 6.955106  | 1.355407 | 0.023033  | -0.001287 | -0.018302 |
| B  | -3.138137 | 6.846495  | 5.011383 | 0.021907  | -0.001272 | -0.016672 |
| Si | 0.631772  | 3.486686  | 4.508512 | -0.005499 | -0.002037 | -0.009175 |
| Si | 1.821370  | 10.314915 | 1.858278 | -0.005977 | -0.002061 | -0.008999 |
| Si | -0.333059 | 10.387486 | 5.041673 | 0.006140  | -0.001972 | 0.009292  |
| Si | 2.786201  | 3.414115  | 1.325117 | 0.005312  | -0.002087 | 0.008870  |
| O  | 0.061445  | 3.072947  | 3.041906 | -0.013343 | -0.000576 | -0.007745 |
| O  | 2.391697  | 10.728653 | 3.324884 | -0.014202 | -0.000365 | -0.007586 |
| O  | 4.546126  | 9.973747  | 0.141489 | 0.014694  | -0.000633 | 0.007689  |
| O  | -2.092984 | 3.827853  | 6.225301 | 0.012821  | -0.000330 | 0.007619  |
| O  | 2.197450  | 3.933608  | 4.519003 | -0.011218 | 0.010218  | -0.019197 |
| O  | 0.255692  | 9.867992  | 1.847787 | -0.011744 | 0.010964  | -0.020364 |
| O  | -1.898737 | 10.834409 | 5.031182 | 0.011805  | 0.010671  | 0.021136  |
| O  | 4.351879  | 2.967192  | 1.335608 | 0.011152  | 0.010594  | 0.018387  |
| O  | -0.212316 | 4.798696  | 5.055280 | 0.002893  | 0.003427  | -0.020410 |
| O  | 2.665458  | 9.002905  | 1.311510 | 0.003576  | 0.004440  | -0.020905 |
| O  | 0.511030  | 11.699496 | 4.494905 | -0.003607 | 0.004579  | 0.020893  |
| O  | 1.942113  | 2.102105  | 1.871885 | -0.002865 | 0.003318  | 0.020406  |
| O  | 0.525580  | 2.169271  | 5.472081 | -0.019609 | 0.013094  | 0.014605  |
| O  | 1.927562  | 11.632329 | 0.894709 | -0.022762 | 0.013923  | 0.016052  |
| O  | -0.226867 | 9.070071  | 4.078104 | 0.022242  | 0.013976  | -0.015872 |
| O  | 2.680009  | 4.731529  | 2.288686 | 0.020088  | 0.013068  | -0.014782 |
| O  | 0.058846  | 0.698526  | 2.444964 | -0.031442 | 0.002866  | 0.031365  |
| O  | 2.394296  | 13.103075 | 3.921826 | -0.031988 | 0.003266  | 0.031634  |
| O  | 4.548725  | 7.599326  | 0.738431 | 0.031913  | 0.002990  | -0.031818 |
| O  | -2.095583 | 6.202275  | 5.628359 | 0.031540  | 0.003107  | -0.031148 |
| O  | -2.459230 | 13.184059 | 5.445139 | -0.048212 | 0.008267  | 0.044634  |
| O  | 4.912372  | 0.617542  | 0.921651 | -0.045867 | 0.007577  | 0.042162  |
| O  | 2.757943  | 6.283259  | 4.105046 | 0.045467  | 0.007557  | -0.041497 |
| O  | -0.304801 | 7.518342  | 2.261744 | 0.048594  | 0.008254  | -0.045224 |
| O  | -0.175430 | 2.374756  | 0.744070 | 0.005018  | -0.047868 | -0.011771 |

|   |           |           |          |           |           |           |
|---|-----------|-----------|----------|-----------|-----------|-----------|
| O | 2.628573  | 11.426844 | 5.622720 | 0.004343  | -0.048468 | -0.012281 |
| O | 4.783002  | 9.275557  | 2.439325 | -0.004436 | -0.049138 | 0.012310  |
| O | -2.329859 | 4.526044  | 3.927465 | -0.004939 | -0.047190 | 0.011732  |
| O | -1.223866 | 12.517207 | 2.155216 | 0.025075  | -0.020936 | -0.029173 |
| O | 3.677009  | 1.284394  | 4.211574 | 0.025050  | -0.020968 | -0.028882 |
| O | 5.831438  | 5.616407  | 1.028179 | -0.025568 | -0.021293 | 0.028789  |
| O | -3.378295 | 8.185194  | 5.338611 | -0.024479 | -0.020624 | 0.029290  |
| H | -0.637445 | 12.195109 | 2.878812 | 0.027370  | -0.014878 | -0.028472 |
| H | 3.090587  | 1.606491  | 3.487978 | 0.027829  | -0.015265 | -0.028767 |
| H | 5.245016  | 5.294309  | 0.304583 | -0.028519 | -0.015259 | 0.028635  |
| H | -2.791874 | 8.507292  | 6.062207 | -0.026570 | -0.014910 | 0.028612  |

145 f = 6.888065 THz 43.278990 2PiTHz 229.761117 cm-1 28.486758  
meV

|    | X         | Y         | Z        | dx        | dy        | dz        |
|----|-----------|-----------|----------|-----------|-----------|-----------|
| Li | 3.769818  | 9.645336  | 4.001386 | 0.000820  | -0.013522 | -0.005703 |
| Li | -1.316675 | 4.156264  | 2.365404 | -0.000631 | 0.014383  | 0.005889  |
| Li | -3.471104 | 2.744536  | 5.548798 | 0.000929  | 0.013580  | -0.005858 |
| Li | 5.924247  | 11.057064 | 0.817991 | -0.000558 | -0.014312 | 0.005705  |
| Na | 2.049025  | 6.784862  | 1.629696 | -0.014687 | 0.081350  | -0.016789 |
| Na | 0.404117  | 7.016739  | 4.737094 | 0.014356  | -0.077595 | 0.015468  |
| Na | 2.558546  | 13.685662 | 1.553699 | -0.014741 | -0.081148 | -0.016705 |
| Na | -0.105403 | 0.115939  | 4.813091 | 0.014305  | 0.077723  | 0.015493  |
| B  | 4.155007  | 8.978944  | 1.168663 | 0.000358  | 0.011304  | -0.003913 |
| B  | -1.701865 | 4.822656  | 5.198127 | -0.000149 | -0.009598 | 0.004199  |
| B  | 0.452564  | 2.078144  | 2.014732 | 0.000292  | -0.011362 | -0.003880 |
| B  | 2.000578  | 11.723457 | 4.352058 | -0.000221 | 0.009547  | 0.004243  |
| B  | -2.733891 | 11.746082 | 5.839177 | 0.003940  | 0.001529  | -0.010507 |
| B  | 5.187034  | 2.055518  | 0.527613 | -0.004296 | -0.003659 | 0.010425  |
| B  | 3.032605  | 4.845282  | 3.711007 | 0.003980  | -0.001520 | -0.010571 |
| B  | -0.579463 | 8.956318  | 2.655782 | -0.004241 | 0.003645  | 0.010356  |
| B  | -0.983708 | 0.054306  | 1.827988 | -0.011197 | -0.004608 | 0.007565  |
| B  | 3.436850  | 13.747295 | 4.538802 | 0.010152  | 0.003016  | -0.006189 |
| B  | 5.591279  | 6.955106  | 1.355407 | -0.011064 | 0.004590  | 0.007479  |
| B  | -3.138137 | 6.846495  | 5.011383 | 0.010273  | -0.003025 | -0.006265 |

|    |           |           |          |           |           |           |
|----|-----------|-----------|----------|-----------|-----------|-----------|
| Si | 0.631772  | 3.486686  | 4.508512 | -0.003191 | -0.005128 | -0.012924 |
| Si | 1.821370  | 10.314915 | 1.858278 | 0.003475  | 0.005200  | 0.012820  |
| Si | -0.333059 | 10.387486 | 5.041673 | -0.003146 | 0.005114  | -0.012862 |
| Si | 2.786201  | 3.414115  | 1.325117 | 0.003540  | -0.005195 | 0.012890  |
| O  | 0.061445  | 3.072947  | 3.041906 | 0.006851  | 0.008717  | -0.019528 |
| O  | 2.391697  | 10.728653 | 3.324884 | -0.005993 | -0.008576 | 0.018725  |
| O  | 4.546126  | 9.973747  | 0.141489 | 0.006943  | -0.008725 | -0.019474 |
| O  | -2.092984 | 3.827853  | 6.225301 | -0.005852 | 0.008552  | 0.018763  |
| O  | 2.197450  | 3.933608  | 4.519003 | -0.007453 | -0.002236 | -0.021378 |
| O  | 0.255692  | 9.867992  | 1.847787 | 0.007970  | 0.002834  | 0.020880  |
| O  | -1.898737 | 10.834409 | 5.031182 | -0.007376 | 0.002298  | -0.021293 |
| O  | 4.351879  | 2.967192  | 1.335608 | 0.008070  | -0.002769 | 0.020994  |
| O  | -0.212316 | 4.798696  | 5.055280 | -0.005074 | -0.017228 | -0.002261 |
| O  | 2.665458  | 9.002905  | 1.311510 | 0.005539  | 0.018383  | 0.001497  |
| O  | 0.511030  | 11.699496 | 4.494905 | -0.005091 | 0.017271  | -0.002097 |
| O  | 1.942113  | 2.102105  | 1.871885 | 0.005530  | -0.018333 | 0.001639  |
| O  | 0.525580  | 2.169271  | 5.472081 | -0.015359 | 0.017595  | 0.012341  |
| O  | 1.927562  | 11.632329 | 0.894709 | 0.015706  | -0.018626 | -0.012937 |
| O  | -0.226867 | 9.070071  | 4.078104 | -0.015224 | -0.017523 | 0.012269  |
| O  | 2.680009  | 4.731529  | 2.288686 | 0.015803  | 0.018720  | -0.013005 |
| O  | 0.058846  | 0.698526  | 2.444964 | -0.026316 | 0.006680  | 0.025924  |
| O  | 2.394296  | 13.103075 | 3.921826 | 0.024728  | -0.007830 | -0.023595 |
| O  | 4.548725  | 7.599326  | 0.738431 | -0.026123 | -0.006673 | 0.025737  |
| O  | -2.095583 | 6.202275  | 5.628359 | 0.024903  | 0.007834  | -0.023764 |
| O  | -2.459230 | 13.184059 | 5.445139 | 0.011479  | 0.005079  | -0.004394 |
| O  | 4.912372  | 0.617542  | 0.921651 | -0.013256 | -0.007088 | 0.005865  |
| O  | 2.757943  | 6.283259  | 4.105046 | 0.011722  | -0.005028 | -0.004609 |
| O  | -0.304801 | 7.518342  | 2.261744 | -0.012987 | 0.007123  | 0.005635  |
| O  | -0.175430 | 2.374756  | 0.744070 | 0.004684  | -0.031506 | -0.010104 |
| O  | 2.628573  | 11.426844 | 5.622720 | -0.004303 | 0.026593  | 0.009559  |
| O  | 4.783002  | 9.275557  | 2.439325 | 0.004633  | 0.031189  | -0.010011 |
| O  | -2.329859 | 4.526044  | 3.927465 | -0.004354 | -0.026857 | 0.009636  |
| O  | -1.223866 | 12.517207 | 2.155216 | 0.018774  | -0.012354 | -0.008089 |
| O  | 3.677009  | 1.284394  | 4.211574 | -0.018040 | 0.010026  | 0.008218  |
| O  | 5.831438  | 5.616407  | 1.028179 | 0.018634  | 0.012219  | -0.007895 |
| O  | -3.378295 | 8.185194  | 5.338611 | -0.018181 | -0.010145 | 0.008404  |

|   |           |           |          |           |           |           |
|---|-----------|-----------|----------|-----------|-----------|-----------|
| H | -0.637445 | 12.195109 | 2.878812 | 0.011906  | 0.004517  | 0.005962  |
| H | 3.090587  | 1.606491  | 3.487978 | -0.010667 | -0.006843 | -0.006256 |
| H | 5.245016  | 5.294309  | 0.304583 | 0.011768  | -0.004628 | 0.006147  |
| H | -2.791874 | 8.507292  | 6.062207 | -0.010800 | 0.006764  | -0.006093 |

146 f = 6.786627 THz 42.641638 2PiTHz 226.377516 cm-1 28.067245 meV

|    | X         | Y         | Z        | dx        | dy        | dz        |
|----|-----------|-----------|----------|-----------|-----------|-----------|
| Li | 3.769818  | 9.645336  | 4.001386 | 0.003121  | 0.009414  | 0.001533  |
| Li | -1.316675 | 4.156264  | 2.365404 | 0.003146  | 0.008755  | 0.001173  |
| Li | -3.471104 | 2.744536  | 5.548798 | 0.003076  | -0.009486 | 0.001476  |
| Li | 5.924247  | 11.057064 | 0.817991 | 0.003185  | -0.008691 | 0.001233  |
| Na | 2.049025  | 6.784862  | 1.629696 | -0.006655 | 0.055135  | -0.021590 |
| Na | 0.404117  | 7.016739  | 4.737094 | -0.008050 | 0.061271  | -0.022739 |
| Na | 2.558546  | 13.685662 | 1.553699 | -0.006791 | -0.055335 | -0.021308 |
| Na | -0.105403 | 0.115939  | 4.813091 | -0.007916 | -0.061009 | -0.023048 |
| B  | 4.155007  | 8.978944  | 1.168663 | 0.002392  | 0.020565  | 0.004959  |
| B  | -1.701865 | 4.822656  | 5.198127 | 0.002572  | 0.021346  | 0.004629  |
| B  | 0.452564  | 2.078144  | 2.014732 | 0.002385  | -0.020526 | 0.005032  |
| B  | 2.000578  | 11.723457 | 4.352058 | 0.002586  | -0.021400 | 0.004625  |
| B  | -2.733891 | 11.746082 | 5.839177 | -0.004547 | -0.027952 | -0.002036 |
| B  | 5.187034  | 2.055518  | 0.527613 | -0.004486 | -0.027696 | -0.002425 |
| B  | 3.032605  | 4.845282  | 3.711007 | -0.004565 | 0.027964  | -0.002012 |
| B  | -0.579463 | 8.956318  | 2.655782 | -0.004518 | 0.027674  | -0.002442 |
| B  | -0.983708 | 0.054306  | 1.827988 | -0.011285 | -0.018357 | 0.018240  |
| B  | 3.436850  | 13.747295 | 4.538802 | -0.011845 | -0.018728 | 0.018369  |
| B  | 5.591279  | 6.955106  | 1.355407 | -0.011283 | 0.018376  | 0.018180  |
| B  | -3.138137 | 6.846495  | 5.011383 | -0.011833 | 0.018711  | 0.018404  |
| Si | 0.631772  | 3.486686  | 4.508512 | 0.004438  | 0.000975  | 0.001129  |
| Si | 1.821370  | 10.314915 | 1.858278 | 0.004348  | 0.000554  | 0.000177  |
| Si | -0.333059 | 10.387486 | 5.041673 | 0.004443  | -0.000977 | 0.001089  |
| Si | 2.786201  | 3.414115  | 1.325117 | 0.004332  | -0.000549 | 0.000215  |
| O  | 0.061445  | 3.072947  | 3.041906 | 0.014018  | 0.004644  | -0.009587 |
| O  | 2.391697  | 10.728653 | 3.324884 | 0.014938  | 0.005286  | -0.011108 |
| O  | 4.546126  | 9.973747  | 0.141489 | 0.014110  | -0.004618 | -0.009649 |

|   |           |           |          |           |           |           |
|---|-----------|-----------|----------|-----------|-----------|-----------|
| O | -2.092984 | 3.827853  | 6.225301 | 0.014843  | -0.005304 | -0.011060 |
| O | 2.197450  | 3.933608  | 4.519003 | 0.008141  | 0.006939  | -0.004467 |
| O | 0.255692  | 9.867992  | 1.847787 | 0.007702  | 0.006727  | -0.005365 |
| O | -1.898737 | 10.834409 | 5.031182 | 0.008156  | -0.006942 | -0.004450 |
| O | 4.351879  | 2.967192  | 1.335608 | 0.007694  | -0.006701 | -0.005441 |
| O | -0.212316 | 4.798696  | 5.055280 | 0.006888  | 0.016050  | -0.007213 |
| O | 2.665458  | 9.002905  | 1.311510 | 0.006356  | 0.014497  | -0.007301 |
| O | 0.511030  | 11.699496 | 4.494905 | 0.006901  | -0.016101 | -0.007318 |
| O | 1.942113  | 2.102105  | 1.871885 | 0.006372  | -0.014453 | -0.007107 |
| O | 0.525580  | 2.169271  | 5.472081 | 0.005475  | -0.017401 | -0.009731 |
| O | 1.927562  | 11.632329 | 0.894709 | 0.004842  | -0.016359 | -0.009197 |
| O | -0.226867 | 9.070071  | 4.078104 | 0.005336  | 0.017352  | -0.009726 |
| O | 2.680009  | 4.731529  | 2.288686 | 0.004862  | 0.016397  | -0.009186 |
| O | 0.058846  | 0.698526  | 2.444964 | -0.017855 | -0.012900 | 0.029039  |
| O | 2.394296  | 13.103075 | 3.921826 | -0.019646 | -0.012464 | 0.030677  |
| O | 4.548725  | 7.599326  | 0.738431 | -0.017865 | 0.012933  | 0.029000  |
| O | -2.095583 | 6.202275  | 5.628359 | -0.019569 | 0.012444  | 0.030602  |
| O | -2.459230 | 13.184059 | 5.445139 | -0.019595 | -0.027187 | 0.016867  |
| O | 4.912372  | 0.617542  | 0.921651 | -0.019205 | -0.026570 | 0.017182  |
| O | 2.757943  | 6.283259  | 4.105046 | -0.019621 | 0.027186  | 0.016937  |
| O | -0.304801 | 7.518342  | 2.261744 | -0.019222 | 0.026560  | 0.017153  |
| O | -0.175430 | 2.374756  | 0.744070 | 0.003755  | -0.058088 | -0.005288 |
| O | 2.628573  | 11.426844 | 5.622720 | 0.004171  | -0.060015 | -0.005995 |
| O | 4.783002  | 9.275557  | 2.439325 | 0.003717  | 0.058076  | -0.005347 |
| O | -2.329859 | 4.526044  | 3.927465 | 0.004152  | 0.059976  | -0.005982 |
| O | -1.223866 | 12.517207 | 2.155216 | 0.008823  | -0.026950 | 0.006451  |
| O | 3.677009  | 1.284394  | 4.211574 | 0.010089  | -0.027782 | 0.005577  |
| O | 5.831438  | 5.616407  | 1.028179 | 0.008806  | 0.026983  | 0.006312  |
| O | -3.378295 | 8.185194  | 5.338611 | 0.010126  | 0.027739  | 0.005733  |
| H | -0.637445 | 12.195109 | 2.878812 | 0.017002  | -0.028603 | -0.001278 |
| H | 3.090587  | 1.606491  | 3.487978 | 0.017615  | -0.028154 | -0.000991 |
| H | 5.245016  | 5.294309  | 0.304583 | 0.016971  | 0.028646  | -0.001417 |
| H | -2.791874 | 8.507292  | 6.062207 | 0.017735  | 0.028095  | -0.000884 |

147 f = 6.256865 THz 39.313045 2PiTHz 208.706560 cm-1 25.876325



meV

|    | X         | Y         | Z        | dx        | dy        | dz        |
|----|-----------|-----------|----------|-----------|-----------|-----------|
| Li | 3.769818  | 9.645336  | 4.001386 | 0.004356  | -0.001833 | -0.024274 |
| Li | -1.316675 | 4.156264  | 2.365404 | -0.003476 | 0.002704  | 0.023736  |
| Li | -3.471104 | 2.744536  | 5.548798 | -0.003520 | -0.002636 | 0.023782  |
| Li | 5.924247  | 11.057064 | 0.817991 | 0.004366  | 0.001788  | -0.024282 |
| Na | 2.049025  | 6.784862  | 1.629696 | -0.004091 | 0.004333  | 0.008262  |
| Na | 0.404117  | 7.016739  | 4.737094 | 0.003953  | -0.003989 | -0.008099 |
| Na | 2.558546  | 13.685662 | 1.553699 | 0.003959  | 0.004010  | -0.008171 |
| Na | -0.105403 | 0.115939  | 4.813091 | -0.004099 | -0.004344 | 0.008270  |
| B  | 4.155007  | 8.978944  | 1.168663 | 0.000899  | 0.009536  | -0.014753 |
| B  | -1.701865 | 4.822656  | 5.198127 | -0.000884 | -0.009108 | 0.015228  |
| B  | 0.452564  | 2.078144  | 2.014732 | -0.000907 | 0.009077  | 0.015224  |
| B  | 2.000578  | 11.723457 | 4.352058 | 0.000896  | -0.009494 | -0.014693 |
| B  | -2.733891 | 11.746082 | 5.839177 | -0.011377 | -0.023290 | 0.007984  |
| B  | 5.187034  | 2.055518  | 0.527613 | 0.011663  | 0.023591  | -0.007741 |
| B  | 3.032605  | 4.845282  | 3.711007 | 0.011699  | -0.023565 | -0.007765 |
| B  | -0.579463 | 8.956318  | 2.655782 | -0.011396 | 0.023259  | 0.007931  |
| B  | -0.983708 | 0.054306  | 1.827988 | -0.013232 | 0.019386  | -0.025623 |
| B  | 3.436850  | 13.747295 | 4.538802 | 0.012803  | -0.019658 | 0.024772  |
| B  | 5.591279  | 6.955106  | 1.355407 | 0.012756  | 0.019665  | 0.024666  |
| B  | -3.138137 | 6.846495  | 5.011383 | -0.013165 | -0.019391 | -0.025602 |
| Si | 0.631772  | 3.486686  | 4.508512 | 0.005278  | 0.004907  | 0.003150  |
| Si | 1.821370  | 10.314915 | 1.858278 | -0.005008 | -0.004758 | -0.002658 |
| Si | -0.333059 | 10.387486 | 5.041673 | -0.005012 | 0.004758  | -0.002707 |
| Si | 2.786201  | 3.414115  | 1.325117 | 0.005267  | -0.004919 | 0.003164  |
| O  | 0.061445  | 3.072947  | 3.041906 | -0.010038 | 0.006319  | 0.010102  |
| O  | 2.391697  | 10.728653 | 3.324884 | 0.009865  | -0.006846 | -0.009360 |
| O  | 4.546126  | 9.973747  | 0.141489 | 0.009896  | 0.006857  | -0.009423 |
| O  | -2.092984 | 3.827853  | 6.225301 | -0.010012 | -0.006358 | 0.010096  |
| O  | 2.197450  | 3.933608  | 4.519003 | 0.014597  | -0.034904 | -0.025989 |
| O  | 0.255692  | 9.867992  | 1.847787 | -0.014150 | 0.034459  | 0.026129  |
| O  | -1.898737 | 10.834409 | 5.031182 | -0.014175 | -0.034540 | 0.026193  |
| O  | 4.351879  | 2.967192  | 1.335608 | 0.014599  | 0.034948  | -0.025966 |
| O  | -0.212316 | 4.798696  | 5.055280 | 0.007053  | -0.004000 | 0.029857  |
| O  | 2.665458  | 9.002905  | 1.311510 | -0.006741 | 0.004247  | -0.028968 |

|   |           |           |          |           |           |           |
|---|-----------|-----------|----------|-----------|-----------|-----------|
| O | 0.511030  | 11.699496 | 4.494905 | -0.006757 | -0.004210 | -0.028950 |
| O | 1.942113  | 2.102105  | 1.871885 | 0.007033  | 0.003991  | 0.029864  |
| O | 0.525580  | 2.169271  | 5.472081 | 0.028593  | -0.001159 | -0.009165 |
| O | 1.927562  | 11.632329 | 0.894709 | -0.028289 | 0.001332  | 0.009523  |
| O | -0.226867 | 9.070071  | 4.078104 | -0.028296 | -0.001327 | 0.009462  |
| O | 2.680009  | 4.731529  | 2.288686 | 0.028591  | 0.001169  | -0.009178 |
| O | 0.058846  | 0.698526  | 2.444964 | -0.020472 | 0.006311  | 0.001167  |
| O | 2.394296  | 13.103075 | 3.921826 | 0.020103  | -0.007109 | -0.001408 |
| O | 4.548725  | 7.599326  | 0.738431 | 0.020089  | 0.007162  | -0.001517 |
| O | -2.095583 | 6.202275  | 5.628359 | -0.020439 | -0.006353 | 0.001205  |
| O | -2.459230 | 13.184059 | 5.445139 | 0.013486  | -0.036651 | 0.008841  |
| O | 4.912372  | 0.617542  | 0.921651 | -0.013845 | 0.037105  | -0.009137 |
| O | 2.757943  | 6.283259  | 4.105046 | -0.013730 | -0.037059 | -0.009200 |
| O | -0.304801 | 7.518342  | 2.261744 | 0.013398  | 0.036599  | 0.008808  |
| O | -0.175430 | 2.374756  | 0.744070 | 0.012058  | 0.016285  | 0.011453  |
| O | 2.628573  | 11.426844 | 5.622720 | -0.011569 | -0.016404 | -0.011082 |
| O | 4.783002  | 9.275557  | 2.439325 | -0.011575 | 0.016443  | -0.011134 |
| O | -2.329859 | 4.526044  | 3.927465 | 0.012079  | -0.016299 | 0.011455  |
| O | -1.223866 | 12.517207 | 2.155216 | -0.018226 | 0.008286  | -0.078832 |
| O | 3.677009  | 1.284394  | 4.211574 | 0.017280  | -0.008879 | 0.076530  |
| O | 5.831438  | 5.616407  | 1.028179 | 0.017232  | 0.008903  | 0.076361  |
| O | -3.378295 | 8.185194  | 5.338611 | -0.018180 | -0.008311 | -0.078756 |
| H | -0.637445 | 12.195109 | 2.878812 | -0.034196 | -0.008723 | -0.074757 |
| H | 3.090587  | 1.606491  | 3.487978 | 0.032176  | 0.007766  | 0.073059  |
| H | 5.245016  | 5.294309  | 0.304583 | 0.032107  | -0.007751 | 0.072906  |
| H | -2.791874 | 8.507292  | 6.062207 | -0.034157 | 0.008718  | -0.074682 |

148 f = 6.245334 THz 39.240593 2PiTHz 208.321922 cm-1 25.828636

meV

|    | X         | Y         | Z        | dx        | dy        | dz        |
|----|-----------|-----------|----------|-----------|-----------|-----------|
| Li | 3.769818  | 9.645336  | 4.001386 | 0.028768  | 0.029837  | -0.016275 |
| Li | -1.316675 | 4.156264  | 2.365404 | 0.028911  | 0.029658  | -0.016936 |
| Li | -3.471104 | 2.744536  | 5.548798 | 0.028918  | -0.029763 | -0.016986 |
| Li | 5.924247  | 11.057064 | 0.817991 | 0.028749  | -0.029794 | -0.016284 |
| Na | 2.049025  | 6.784862  | 1.629696 | -0.005669 | 0.006535  | 0.000538  |

|    |           |           |          |           |           |           |
|----|-----------|-----------|----------|-----------|-----------|-----------|
| Na | 0.404117  | 7.016739  | 4.737094 | -0.005855 | 0.006677  | 0.000544  |
| Na | 2.558546  | 13.685662 | 1.553699 | -0.005783 | -0.006565 | 0.000638  |
| Na | -0.105403 | 0.115939  | 4.813091 | -0.005692 | -0.006638 | 0.000521  |
| B  | 4.155007  | 8.978944  | 1.168663 | -0.000058 | 0.012779  | 0.017521  |
| B  | -1.701865 | 4.822656  | 5.198127 | -0.000016 | 0.013143  | 0.017037  |
| B  | 0.452564  | 2.078144  | 2.014732 | -0.000039 | -0.013123 | 0.017048  |
| B  | 2.000578  | 11.723457 | 4.352058 | -0.000086 | -0.012840 | 0.017479  |
| B  | -2.733891 | 11.746082 | 5.839177 | 0.010420  | 0.011441  | 0.006822  |
| B  | 5.187034  | 2.055518  | 0.527613 | 0.010094  | 0.010733  | 0.007096  |
| B  | 3.032605  | 4.845282  | 3.711007 | 0.010109  | -0.010704 | 0.007059  |
| B  | -0.579463 | 8.956318  | 2.655782 | 0.010473  | -0.011405 | 0.006855  |
| B  | -0.983708 | 0.054306  | 1.827988 | -0.015240 | -0.007685 | -0.028651 |
| B  | 3.436850  | 13.747295 | 4.538802 | -0.015680 | -0.007085 | -0.029416 |
| B  | 5.591279  | 6.955106  | 1.355407 | -0.015554 | 0.007072  | -0.029334 |
| B  | -3.138137 | 6.846495  | 5.011383 | -0.015257 | 0.007690  | -0.028632 |
| Si | 0.631772  | 3.486686  | 4.508512 | 0.009537  | 0.004972  | 0.015807  |
| Si | 1.821370  | 10.314915 | 1.858278 | 0.009681  | 0.005100  | 0.015852  |
| Si | -0.333059 | 10.387486 | 5.041673 | 0.009651  | -0.005101 | 0.015903  |
| Si | 2.786201  | 3.414115  | 1.325117 | 0.009524  | -0.004950 | 0.015773  |
| O  | 0.061445  | 3.072947  | 3.041906 | -0.004027 | -0.015494 | 0.023192  |
| O  | 2.391697  | 10.728653 | 3.324884 | -0.004323 | -0.015235 | 0.023412  |
| O  | 4.546126  | 9.973747  | 0.141489 | -0.004369 | 0.015219  | 0.023471  |
| O  | -2.092984 | 3.827853  | 6.225301 | -0.003959 | 0.015417  | 0.023095  |
| O  | 2.197450  | 3.933608  | 4.519003 | 0.015530  | -0.016025 | 0.005504  |
| O  | 0.255692  | 9.867992  | 1.847787 | 0.015923  | -0.017028 | 0.004741  |
| O  | -1.898737 | 10.834409 | 5.031182 | 0.015928  | 0.017120  | 0.004685  |
| O  | 4.351879  | 2.967192  | 1.335608 | 0.015493  | 0.015999  | 0.005574  |
| O  | -0.212316 | 4.798696  | 5.055280 | 0.010055  | 0.007136  | 0.030306  |
| O  | 2.665458  | 9.002905  | 1.311510 | 0.010232  | 0.006905  | 0.031259  |
| O  | 0.511030  | 11.699496 | 4.494905 | 0.010230  | -0.006988 | 0.031233  |
| O  | 1.942113  | 2.102105  | 1.871885 | 0.010014  | -0.007055 | 0.030311  |
| O  | 0.525580  | 2.169271  | 5.472081 | 0.010764  | 0.005714  | 0.010917  |
| O  | 1.927562  | 11.632329 | 0.894709 | 0.011661  | 0.005637  | 0.010573  |
| O  | -0.226867 | 9.070071  | 4.078104 | 0.011645  | -0.005635 | 0.010624  |
| O  | 2.680009  | 4.731529  | 2.288686 | 0.010787  | -0.005672 | 0.010867  |
| O  | 0.058846  | 0.698526  | 2.444964 | -0.012866 | -0.025362 | -0.008218 |

|   |           |           |          |           |           |           |
|---|-----------|-----------|----------|-----------|-----------|-----------|
| O | 2.394296  | 13.103075 | 3.921826 | -0.013538 | -0.025136 | -0.008155 |
| O | 4.548725  | 7.599326  | 0.738431 | -0.013424 | 0.025087  | -0.008107 |
| O | -2.095583 | 6.202275  | 5.628359 | -0.012924 | 0.025342  | -0.008140 |
| O | -2.459230 | 13.184059 | 5.445139 | -0.013123 | 0.018002  | -0.010347 |
| O | 4.912372  | 0.617542  | 0.921651 | -0.012630 | 0.016872  | -0.010109 |
| O | 2.757943  | 6.283259  | 4.105046 | -0.012643 | -0.016844 | -0.010114 |
| O | -0.304801 | 7.518342  | 2.261744 | -0.012949 | -0.017956 | -0.010343 |
| O | -0.175430 | 2.374756  | 0.744070 | 0.016887  | -0.004794 | 0.011741  |
| O | 2.628573  | 11.426844 | 5.622720 | 0.017240  | -0.004368 | 0.012043  |
| O | 4.783002  | 9.275557  | 2.439325 | 0.017262  | 0.004290  | 0.012089  |
| O | -2.329859 | 4.526044  | 3.927465 | 0.016921  | 0.004900  | 0.011705  |
| O | -1.223866 | 12.517207 | 2.155216 | -0.033086 | -0.018153 | -0.076941 |
| O | 3.677009  | 1.284394  | 4.211574 | -0.033569 | -0.017906 | -0.079313 |
| O | 5.831438  | 5.616407  | 1.028179 | -0.033505 | 0.017854  | -0.079141 |
| O | -3.378295 | 8.185194  | 5.338611 | -0.033036 | 0.018179  | -0.076947 |
| H | -0.637445 | 12.195109 | 2.878812 | -0.069717 | -0.030645 | -0.056373 |
| H | 3.090587  | 1.606491  | 3.487978 | -0.070632 | -0.030862 | -0.058632 |
| H | 5.245016  | 5.294309  | 0.304583 | -0.070565 | 0.030847  | -0.058481 |
| H | -2.791874 | 8.507292  | 6.062207 | -0.069651 | 0.030636  | -0.056371 |

149 f = 5.918349 THz 37.186084 2PiTHz 197.414871 cm-1 24.476333 meV

|    | X         | Y         | Z        | dx        | dy        | dz        |
|----|-----------|-----------|----------|-----------|-----------|-----------|
| Li | 3.769818  | 9.645336  | 4.001386 | 0.010377  | 0.020269  | -0.012489 |
| Li | -1.316675 | 4.156264  | 2.365404 | -0.010408 | -0.020363 | 0.012462  |
| Li | -3.471104 | 2.744536  | 5.548798 | 0.010325  | -0.020270 | -0.012426 |
| Li | 5.924247  | 11.057064 | 0.817991 | -0.010414 | 0.020324  | 0.012462  |
| Na | 2.049025  | 6.784862  | 1.629696 | 0.010771  | 0.022516  | -0.005519 |
| Na | 0.404117  | 7.016739  | 4.737094 | -0.010757 | -0.022715 | 0.005900  |
| Na | 2.558546  | 13.685662 | 1.553699 | 0.010848  | -0.022492 | -0.005732 |
| Na | -0.105403 | 0.115939  | 4.813091 | -0.010698 | 0.022728  | 0.005727  |
| B  | 4.155007  | 8.978944  | 1.168663 | -0.002875 | -0.016570 | 0.008103  |
| B  | -1.701865 | 4.822656  | 5.198127 | 0.002857  | 0.016561  | -0.008178 |
| B  | 0.452564  | 2.078144  | 2.014732 | -0.002882 | 0.016568  | 0.008159  |
| B  | 2.000578  | 11.723457 | 4.352058 | 0.002865  | -0.016563 | -0.008195 |

|    |           |           |          |           |           |           |
|----|-----------|-----------|----------|-----------|-----------|-----------|
| B  | -2.733891 | 11.746082 | 5.839177 | -0.000586 | -0.006565 | -0.015503 |
| B  | 5.187034  | 2.055518  | 0.527613 | 0.000569  | 0.006558  | 0.015514  |
| B  | 3.032605  | 4.845282  | 3.711007 | -0.000566 | 0.006553  | -0.015531 |
| B  | -0.579463 | 8.956318  | 2.655782 | 0.000537  | -0.006554 | 0.015516  |
| B  | -0.983708 | 0.054306  | 1.827988 | 0.014100  | 0.003788  | 0.010278  |
| B  | 3.436850  | 13.747295 | 4.538802 | -0.014016 | -0.003822 | -0.010264 |
| B  | 5.591279  | 6.955106  | 1.355407 | 0.014133  | -0.003775 | 0.010259  |
| B  | -3.138137 | 6.846495  | 5.011383 | -0.014026 | 0.003823  | -0.010339 |
| Si | 0.631772  | 3.486686  | 4.508512 | 0.000452  | 0.011518  | 0.006040  |
| Si | 1.821370  | 10.314915 | 1.858278 | -0.000484 | -0.011548 | -0.006058 |
| Si | -0.333059 | 10.387486 | 5.041673 | 0.000420  | -0.011517 | 0.006009  |
| Si | 2.786201  | 3.414115  | 1.325117 | -0.000501 | 0.011518  | -0.006072 |
| O  | 0.061445  | 3.072947  | 3.041906 | -0.023741 | -0.009305 | 0.023674  |
| O  | 2.391697  | 10.728653 | 3.324884 | 0.023703  | 0.009252  | -0.023665 |
| O  | 4.546126  | 9.973747  | 0.141489 | -0.023739 | 0.009312  | 0.023627  |
| O  | -2.092984 | 3.827853  | 6.225301 | 0.023654  | -0.009245 | -0.023660 |
| O  | 2.197450  | 3.933608  | 4.519003 | 0.014273  | -0.034559 | -0.045122 |
| O  | 0.255692  | 9.867992  | 1.847787 | -0.014338 | 0.034655  | 0.045189  |
| O  | -1.898737 | 10.834409 | 5.031182 | 0.014243  | 0.034571  | -0.045123 |
| O  | 4.351879  | 2.967192  | 1.335608 | -0.014339 | -0.034618 | 0.045102  |
| O  | -0.212316 | 4.798696  | 5.055280 | 0.010997  | 0.024785  | -0.004434 |
| O  | 2.665458  | 9.002905  | 1.311510 | -0.011048 | -0.024855 | 0.004396  |
| O  | 0.511030  | 11.699496 | 4.494905 | 0.010987  | -0.024815 | -0.004518 |
| O  | 1.942113  | 2.102105  | 1.871885 | -0.011046 | 0.024830  | 0.004428  |
| O  | 0.525580  | 2.169271  | 5.472081 | -0.015960 | 0.029447  | 0.025598  |
| O  | 1.927562  | 11.632329 | 0.894709 | 0.015966  | -0.029449 | -0.025591 |
| O  | -0.226867 | 9.070071  | 4.078104 | -0.016095 | -0.029498 | 0.025630  |
| O  | 2.680009  | 4.731529  | 2.288686 | 0.015972  | 0.029412  | -0.025603 |
| O  | 0.058846  | 0.698526  | 2.444964 | 0.016721  | 0.007517  | -0.002823 |
| O  | 2.394296  | 13.103075 | 3.921826 | -0.016646 | -0.007510 | 0.002789  |
| O  | 4.548725  | 7.599326  | 0.738431 | 0.016788  | -0.007505 | -0.002903 |
| O  | -2.095583 | 6.202275  | 5.628359 | -0.016659 | 0.007530  | 0.002745  |
| O  | -2.459230 | 13.184059 | 5.445139 | -0.034179 | 0.010374  | 0.017766  |
| O  | 4.912372  | 0.617542  | 0.921651 | 0.034256  | -0.010415 | -0.017770 |
| O  | 2.757943  | 6.283259  | 4.105046 | -0.034174 | -0.010390 | 0.017693  |
| O  | -0.304801 | 7.518342  | 2.261744 | 0.034280  | 0.010449  | -0.017799 |

|   |           |           |          |           |           |           |
|---|-----------|-----------|----------|-----------|-----------|-----------|
| O | -0.175430 | 2.374756  | 0.744070 | -0.006103 | 0.036567  | 0.012477  |
| O | 2.628573  | 11.426844 | 5.622720 | 0.006041  | -0.036467 | -0.012467 |
| O | 4.783002  | 9.275557  | 2.439325 | -0.006118 | -0.036554 | 0.012419  |
| O | -2.329859 | 4.526044  | 3.927465 | 0.006065  | 0.036469  | -0.012474 |
| O | -1.223866 | 12.517207 | 2.155216 | -0.013130 | 0.017306  | 0.046928  |
| O | 3.677009  | 1.284394  | 4.211574 | 0.013247  | -0.017302 | -0.046822 |
| O | 5.831438  | 5.616407  | 1.028179 | -0.013104 | -0.017311 | 0.047002  |
| O | -3.378295 | 8.185194  | 5.338611 | 0.013204  | 0.017311  | -0.046944 |
| H | -0.637445 | 12.195109 | 2.878812 | -0.010471 | 0.008383  | 0.041433  |
| H | 3.090587  | 1.606491  | 3.487978 | 0.010668  | -0.008337 | -0.041363 |
| H | 5.245016  | 5.294309  | 0.304583 | -0.010432 | -0.008426 | 0.041514  |
| H | -2.791874 | 8.507292  | 6.062207 | 0.010574  | 0.008343  | -0.041445 |

150 f = 5.728637 THz 35.994090 2PiTHz 191.086766 cm-1 23.691748  
meV

|    | X         | Y         | Z        | dx        | dy        | dz        |
|----|-----------|-----------|----------|-----------|-----------|-----------|
| Li | 3.769818  | 9.645336  | 4.001386 | 0.002645  | -0.024902 | 0.002755  |
| Li | -1.316675 | 4.156264  | 2.365404 | 0.002780  | -0.025074 | 0.002712  |
| Li | -3.471104 | 2.744536  | 5.548798 | 0.002719  | 0.025119  | 0.002779  |
| Li | 5.924247  | 11.057064 | 0.817991 | 0.002723  | 0.024909  | 0.002684  |
| Na | 2.049025  | 6.784862  | 1.629696 | -0.007594 | 0.009821  | 0.011509  |
| Na | 0.404117  | 7.016739  | 4.737094 | -0.007666 | 0.009674  | 0.010759  |
| Na | 2.558546  | 13.685662 | 1.553699 | -0.007633 | -0.009565 | 0.010815  |
| Na | -0.105403 | 0.115939  | 4.813091 | -0.007593 | -0.009917 | 0.011465  |
| B  | 4.155007  | 8.978944  | 1.168663 | 0.001210  | 0.020593  | -0.005134 |
| B  | -1.701865 | 4.822656  | 5.198127 | 0.001238  | 0.020787  | -0.005160 |
| B  | 0.452564  | 2.078144  | 2.014732 | 0.001243  | -0.020809 | -0.005157 |
| B  | 2.000578  | 11.723457 | 4.352058 | 0.001188  | -0.020568 | -0.005156 |
| B  | -2.733891 | 11.746082 | 5.839177 | -0.002987 | -0.018206 | 0.003284  |
| B  | 5.187034  | 2.055518  | 0.527613 | -0.002946 | -0.018286 | 0.003281  |
| B  | 3.032605  | 4.845282  | 3.711007 | -0.002930 | 0.018304  | 0.003287  |
| B  | -0.579463 | 8.956318  | 2.655782 | -0.002981 | 0.018177  | 0.003270  |
| B  | -0.983708 | 0.054306  | 1.827988 | 0.017480  | -0.033205 | -0.023013 |
| B  | 3.436850  | 13.747295 | 4.538802 | 0.017513  | -0.033005 | -0.022953 |
| B  | 5.591279  | 6.955106  | 1.355407 | 0.017511  | 0.033010  | -0.023021 |

|    |           |           |          |           |           |           |
|----|-----------|-----------|----------|-----------|-----------|-----------|
| B  | -3.138137 | 6.846495  | 5.011383 | 0.017504  | 0.033202  | -0.022973 |
| Si | 0.631772  | 3.486686  | 4.508512 | -0.003905 | 0.004988  | 0.006584  |
| Si | 1.821370  | 10.314915 | 1.858278 | -0.003975 | 0.004994  | 0.006582  |
| Si | -0.333059 | 10.387486 | 5.041673 | -0.003922 | -0.004998 | 0.006615  |
| Si | 2.786201  | 3.414115  | 1.325117 | -0.003926 | -0.004991 | 0.006575  |
| O  | 0.061445  | 3.072947  | 3.041906 | 0.001980  | -0.037373 | 0.015774  |
| O  | 2.391697  | 10.728653 | 3.324884 | 0.001870  | -0.037106 | 0.015713  |
| O  | 4.546126  | 9.973747  | 0.141489 | 0.001939  | 0.037136  | 0.015748  |
| O  | -2.092984 | 3.827853  | 6.225301 | 0.001951  | 0.037353  | 0.015767  |
| O  | 2.197450  | 3.933608  | 4.519003 | -0.015401 | 0.049498  | 0.033347  |
| O  | 0.255692  | 9.867992  | 1.847787 | -0.015406 | 0.049208  | 0.033147  |
| O  | -1.898737 | 10.834409 | 5.031182 | -0.015377 | -0.049300 | 0.033264  |
| O  | 4.351879  | 2.967192  | 1.335608 | -0.015397 | -0.049414 | 0.033271  |
| O  | -0.212316 | 4.798696  | 5.055280 | -0.007190 | 0.010809  | -0.017483 |
| O  | 2.665458  | 9.002905  | 1.311510 | -0.007199 | 0.010786  | -0.017356 |
| O  | 0.511030  | 11.699496 | 4.494905 | -0.007216 | -0.010746 | -0.017325 |
| O  | 1.942113  | 2.102105  | 1.871885 | -0.007183 | -0.010827 | -0.017491 |
| O  | 0.525580  | 2.169271  | 5.472081 | -0.013690 | 0.010413  | 0.011788  |
| O  | 1.927562  | 11.632329 | 0.894709 | -0.013817 | 0.010422  | 0.011786  |
| O  | -0.226867 | 9.070071  | 4.078104 | -0.013689 | -0.010362 | 0.011740  |
| O  | 2.680009  | 4.731529  | 2.288686 | -0.013741 | -0.010457 | 0.011820  |
| O  | 0.058846  | 0.698526  | 2.444964 | 0.021614  | -0.033865 | -0.029841 |
| O  | 2.394296  | 13.103075 | 3.921826 | 0.021542  | -0.033553 | -0.029734 |
| O  | 4.548725  | 7.599326  | 0.738431 | 0.021564  | 0.033608  | -0.029781 |
| O  | -2.095583 | 6.202275  | 5.628359 | 0.021604  | 0.033821  | -0.029793 |
| O  | -2.459230 | 13.184059 | 5.445139 | 0.027177  | -0.037432 | -0.036048 |
| O  | 4.912372  | 0.617542  | 0.921651 | 0.027208  | -0.037552 | -0.036159 |
| O  | 2.757943  | 6.283259  | 4.105046 | 0.027292  | 0.037601  | -0.036204 |
| O  | -0.304801 | 7.518342  | 2.261744 | 0.027150  | 0.037372  | -0.036047 |
| O  | -0.175430 | 2.374756  | 0.744070 | -0.009846 | 0.004674  | 0.005576  |
| O  | 2.628573  | 11.426844 | 5.622720 | -0.009858 | 0.004791  | 0.005523  |
| O  | 4.783002  | 9.275557  | 2.439325 | -0.009871 | -0.004837 | 0.005587  |
| O  | -2.329859 | 4.526044  | 3.927465 | -0.009827 | -0.004678 | 0.005553  |
| O  | -1.223866 | 12.517207 | 2.155216 | 0.001114  | -0.021939 | 0.004655  |
| O  | 3.677009  | 1.284394  | 4.211574 | 0.001432  | -0.021783 | 0.004703  |
| O  | 5.831438  | 5.616407  | 1.028179 | 0.001400  | 0.021804  | 0.004549  |

|   |           |           |          |          |           |           |
|---|-----------|-----------|----------|----------|-----------|-----------|
| O | -3.378295 | 8.185194  | 5.338611 | 0.001129 | 0.021913  | 0.004770  |
| H | -0.637445 | 12.195109 | 2.878812 | 0.010873 | -0.019704 | -0.001111 |
| H | 3.090587  | 1.606491  | 3.487978 | 0.011333 | -0.019544 | -0.001165 |
| H | 5.245016  | 5.294309  | 0.304583 | 0.011267 | 0.019596  | -0.001309 |
| H | -2.791874 | 8.507292  | 6.062207 | 0.010930 | 0.019661  | -0.001019 |

151 f = 5.489746 THz 34.493094 2PiTHz 183.118226 cm-1 22.703775  
meV

|    | X         | Y         | Z        | dx        | dy        | dz        |
|----|-----------|-----------|----------|-----------|-----------|-----------|
| Li | 3.769818  | 9.645336  | 4.001386 | 0.007771  | -0.042483 | 0.003038  |
| Li | -1.316675 | 4.156264  | 2.365404 | 0.008153  | -0.041431 | 0.002867  |
| Li | -3.471104 | 2.744536  | 5.548798 | -0.008113 | -0.041389 | -0.002833 |
| Li | 5.924247  | 11.057064 | 0.817991 | -0.007715 | -0.042443 | -0.002968 |
| Na | 2.049025  | 6.784862  | 1.629696 | -0.006630 | -0.005432 | -0.017839 |
| Na | 0.404117  | 7.016739  | 4.737094 | -0.007457 | -0.005244 | -0.015336 |
| Na | 2.558546  | 13.685662 | 1.553699 | 0.007427  | -0.005223 | 0.015342  |
| Na | -0.105403 | 0.115939  | 4.813091 | 0.006571  | -0.005408 | 0.017804  |
| B  | 4.155007  | 8.978944  | 1.168663 | 0.013014  | -0.002221 | -0.010613 |
| B  | -1.701865 | 4.822656  | 5.198127 | 0.012943  | -0.002725 | -0.010391 |
| B  | 0.452564  | 2.078144  | 2.014732 | -0.012927 | -0.002786 | 0.010419  |
| B  | 2.000578  | 11.723457 | 4.352058 | -0.012978 | -0.002146 | 0.010494  |
| B  | -2.733891 | 11.746082 | 5.839177 | -0.016621 | 0.010718  | 0.004512  |
| B  | 5.187034  | 2.055518  | 0.527613 | -0.016435 | 0.011417  | 0.004530  |
| B  | 3.032605  | 4.845282  | 3.711007 | 0.016471  | 0.011477  | -0.004538 |
| B  | -0.579463 | 8.956318  | 2.655782 | 0.016566  | 0.010645  | -0.004497 |
| B  | -0.983708 | 0.054306  | 1.827988 | -0.009851 | -0.003871 | -0.027042 |
| B  | 3.436850  | 13.747295 | 4.538802 | -0.009473 | -0.003587 | -0.025769 |
| B  | 5.591279  | 6.955106  | 1.355407 | 0.009557  | -0.003653 | 0.025732  |
| B  | -3.138137 | 6.846495  | 5.011383 | 0.009717  | -0.003848 | 0.027131  |
| Si | 0.631772  | 3.486686  | 4.508512 | 0.030577  | 0.007198  | 0.011198  |
| Si | 1.821370  | 10.314915 | 1.858278 | 0.030929  | 0.007079  | 0.011793  |
| Si | -0.333059 | 10.387486 | 5.041673 | -0.030910 | 0.007065  | -0.011821 |
| Si | 2.786201  | 3.414115  | 1.325117 | -0.030532 | 0.007152  | -0.011181 |
| O  | 0.061445  | 3.072947  | 3.041906 | 0.016904  | -0.007682 | 0.022399  |
| O  | 2.391697  | 10.728653 | 3.324884 | 0.018000  | -0.006477 | 0.022270  |



|   |           |           |          |           |           |           |
|---|-----------|-----------|----------|-----------|-----------|-----------|
| O | 4.546126  | 9.973747  | 0.141489 | -0.017808 | -0.006563 | -0.022372 |
| O | -2.092984 | 3.827853  | 6.225301 | -0.016829 | -0.007675 | -0.022385 |
| O | 2.197450  | 3.933608  | 4.519003 | 0.030573  | 0.009493  | 0.012041  |
| O | 0.255692  | 9.867992  | 1.847787 | 0.031057  | 0.008999  | 0.012915  |
| O | -1.898737 | 10.834409 | 5.031182 | -0.031043 | 0.009013  | -0.012778 |
| O | 4.351879  | 2.967192  | 1.335608 | -0.030535 | 0.009408  | -0.011994 |
| O | -0.212316 | 4.798696  | 5.055280 | 0.015860  | -0.006421 | 0.017154  |
| O | 2.665458  | 9.002905  | 1.311510 | 0.016069  | -0.006709 | 0.017895  |
| O | 0.511030  | 11.699496 | 4.494905 | -0.016064 | -0.006775 | -0.018124 |
| O | 1.942113  | 2.102105  | 1.871885 | -0.015838 | -0.006473 | -0.017153 |
| O | 0.525580  | 2.169271  | 5.472081 | 0.026116  | 0.000953  | -0.001825 |
| O | 1.927562  | 11.632329 | 0.894709 | 0.026207  | 0.000059  | -0.002073 |
| O | -0.226867 | 9.070071  | 4.078104 | -0.026441 | -0.000036 | 0.002124  |
| O | 2.680009  | 4.731529  | 2.288686 | -0.026048 | 0.000926  | 0.001823  |
| O | 0.058846  | 0.698526  | 2.444964 | -0.020864 | -0.004875 | -0.006640 |
| O | 2.394296  | 13.103075 | 3.921826 | -0.021075 | -0.003673 | -0.005314 |
| O | 4.548725  | 7.599326  | 0.738431 | 0.021116  | -0.003795 | 0.005266  |
| O | -2.095583 | 6.202275  | 5.628359 | 0.020765  | -0.004842 | 0.006700  |
| O | -2.459230 | 13.184059 | 5.445139 | -0.020148 | 0.010691  | -0.005663 |
| O | 4.912372  | 0.617542  | 0.921651 | -0.020517 | 0.011312  | -0.006413 |
| O | 2.757943  | 6.283259  | 4.105046 | 0.020510  | 0.011367  | 0.006359  |
| O | -0.304801 | 7.518342  | 2.261744 | 0.020179  | 0.010667  | 0.005647  |
| O | -0.175430 | 2.374756  | 0.744070 | -0.022671 | 0.024589  | 0.023048  |
| O | 2.628573  | 11.426844 | 5.622720 | -0.023035 | 0.024550  | 0.023169  |
| O | 4.783002  | 9.275557  | 2.439325 | 0.022978  | 0.024437  | -0.023237 |
| O | -2.329859 | 4.526044  | 3.927465 | 0.022706  | 0.024670  | -0.023034 |
| O | -1.223866 | 12.517207 | 2.155216 | 0.010965  | -0.016720 | -0.068810 |
| O | 3.677009  | 1.284394  | 4.211574 | 0.012556  | -0.016459 | -0.066812 |
| O | 5.831438  | 5.616407  | 1.028179 | -0.012310 | -0.016509 | 0.066808  |
| O | -3.378295 | 8.185194  | 5.338611 | -0.011317 | -0.016765 | 0.069057  |
| H | -0.637445 | 12.195109 | 2.878812 | 0.000667  | -0.013473 | -0.059591 |
| H | 3.090587  | 1.606491  | 3.487978 | 0.003009  | -0.013032 | -0.058081 |
| H | 5.245016  | 5.294309  | 0.304583 | -0.002685 | -0.013132 | 0.058039  |
| H | -2.791874 | 8.507292  | 6.062207 | -0.000990 | -0.013470 | 0.059799  |

152 f = 5.423534 THz 34.077071 2PiTHz 180.909624 cm-1 22.429943  
meV

|    | X         | Y         | Z        | dx        | dy        | dz        |
|----|-----------|-----------|----------|-----------|-----------|-----------|
| Li | 3.769818  | 9.645336  | 4.001386 | -0.005269 | -0.019024 | -0.000221 |
| Li | -1.316675 | 4.156264  | 2.365404 | 0.005595  | 0.018878  | 0.000261  |
| Li | -3.471104 | 2.744536  | 5.548798 | 0.005760  | -0.019620 | 0.000175  |
| Li | 5.924247  | 11.057064 | 0.817991 | -0.005574 | 0.019491  | -0.000064 |
| Na | 2.049025  | 6.784862  | 1.629696 | 0.007382  | -0.005778 | -0.018521 |
| Na | 0.404117  | 7.016739  | 4.737094 | -0.007718 | 0.005656  | 0.018346  |
| Na | 2.558546  | 13.685662 | 1.553699 | -0.008087 | -0.005709 | 0.019715  |
| Na | -0.105403 | 0.115939  | 4.813091 | 0.007849  | 0.005810  | -0.019867 |
| B  | 4.155007  | 8.978944  | 1.168663 | -0.000695 | 0.023044  | 0.017231  |
| B  | -1.701865 | 4.822656  | 5.198127 | 0.000817  | -0.023003 | -0.017358 |
| B  | 0.452564  | 2.078144  | 2.014732 | 0.000719  | 0.023341  | -0.017168 |
| B  | 2.000578  | 11.723457 | 4.352058 | -0.000765 | -0.023429 | 0.017163  |
| B  | -2.733891 | 11.746082 | 5.839177 | 0.014008  | -0.018995 | -0.003202 |
| B  | 5.187034  | 2.055518  | 0.527613 | -0.014183 | 0.019008  | 0.003371  |
| B  | 3.032605  | 4.845282  | 3.711007 | -0.014036 | -0.019440 | 0.003310  |
| B  | -0.579463 | 8.956318  | 2.655782 | 0.014081  | 0.019504  | -0.003240 |
| B  | -0.983708 | 0.054306  | 1.827988 | 0.014996  | 0.023072  | -0.002362 |
| B  | 3.436850  | 13.747295 | 4.538802 | -0.015100 | -0.023194 | 0.002176  |
| B  | 5.591279  | 6.955106  | 1.355407 | -0.014702 | 0.023063  | 0.003065  |
| B  | -3.138137 | 6.846495  | 5.011383 | 0.014876  | -0.022934 | -0.003228 |
| Si | 0.631772  | 3.486686  | 4.508512 | -0.001877 | -0.001405 | -0.005786 |
| Si | 1.821370  | 10.314915 | 1.858278 | 0.002100  | 0.001529  | 0.005969  |
| Si | -0.333059 | 10.387486 | 5.041673 | 0.002128  | -0.001463 | 0.006287  |
| Si | 2.786201  | 3.414115  | 1.325117 | -0.002211 | 0.001357  | -0.006222 |
| O  | 0.061445  | 3.072947  | 3.041906 | 0.020373  | 0.030931  | -0.022355 |
| O  | 2.391697  | 10.728653 | 3.324884 | -0.019901 | -0.030967 | 0.022490  |
| O  | 4.546126  | 9.973747  | 0.141489 | -0.019389 | 0.030237  | 0.022354  |
| O  | -2.092984 | 3.827853  | 6.225301 | 0.019678  | -0.030227 | -0.022410 |
| O  | 2.197450  | 3.933608  | 4.519003 | 0.003409  | -0.026194 | 0.008944  |
| O  | 0.255692  | 9.867992  | 1.847787 | -0.003241 | 0.026530  | -0.008344 |
| O  | -1.898737 | 10.834409 | 5.031182 | -0.003118 | -0.026175 | -0.007931 |
| O  | 4.351879  | 2.967192  | 1.335608 | 0.003011  | 0.025988  | 0.008416  |
| O  | -0.212316 | 4.798696  | 5.055280 | -0.001223 | 0.004378  | -0.026019 |

|   |           |           |          |           |           |           |
|---|-----------|-----------|----------|-----------|-----------|-----------|
| O | 2.665458  | 9.002905  | 1.311510 | 0.001309  | -0.004211 | 0.025823  |
| O | 0.511030  | 11.699496 | 4.494905 | 0.001311  | 0.004300  | 0.026195  |
| O | 1.942113  | 2.102105  | 1.871885 | -0.001410 | -0.004589 | -0.026581 |
| O | 0.525580  | 2.169271  | 5.472081 | -0.039834 | 0.008224  | 0.004360  |
| O | 1.927562  | 11.632329 | 0.894709 | 0.039587  | -0.008005 | -0.004125 |
| O | -0.226867 | 9.070071  | 4.078104 | 0.039606  | 0.008527  | -0.004261 |
| O | 2.680009  | 4.731529  | 2.288686 | -0.040068 | -0.008801 | 0.004492  |
| O | 0.058846  | 0.698526  | 2.444964 | 0.002594  | 0.034853  | 0.003015  |
| O | 2.394296  | 13.103075 | 3.921826 | -0.002813 | -0.034878 | -0.003080 |
| O | 4.548725  | 7.599326  | 0.738431 | -0.002769 | 0.034166  | -0.002186 |
| O | -2.095583 | 6.202275  | 5.628359 | 0.002897  | -0.034135 | 0.002026  |
| O | -2.459230 | 13.184059 | 5.445139 | 0.008035  | -0.020239 | -0.019349 |
| O | 4.912372  | 0.617542  | 0.921651 | -0.008137 | 0.020152  | 0.019188  |
| O | 2.757943  | 6.283259  | 4.105046 | -0.008245 | -0.020511 | 0.018621  |
| O | -0.304801 | 7.518342  | 2.261744 | 0.008526  | 0.020728  | -0.018937 |
| O | -0.175430 | 2.374756  | 0.744070 | -0.010553 | 0.016857  | -0.014155 |
| O | 2.628573  | 11.426844 | 5.622720 | 0.010355  | -0.016715 | 0.014275  |
| O | 4.783002  | 9.275557  | 2.439325 | 0.010340  | 0.016886  | 0.014272  |
| O | -2.329859 | 4.526044  | 3.927465 | -0.010284 | -0.016888 | -0.014369 |
| O | -1.223866 | 12.517207 | 2.155216 | 0.068263  | 0.010470  | -0.021892 |
| O | 3.677009  | 1.284394  | 4.211574 | -0.068187 | -0.010627 | 0.021608  |
| O | 5.831438  | 5.616407  | 1.028179 | -0.067216 | 0.010445  | 0.023102  |
| O | -3.378295 | 8.185194  | 5.338611 | 0.067362  | -0.010389 | -0.023043 |
| H | -0.637445 | 12.195109 | 2.878812 | 0.076147  | 0.018717  | -0.024720 |
| H | 3.090587  | 1.606491  | 3.487978 | -0.075975 | -0.018856 | 0.024379  |
| H | 5.245016  | 5.294309  | 0.304583 | -0.074535 | 0.018601  | 0.025556  |
| H | -2.791874 | 8.507292  | 6.062207 | 0.074784  | -0.018549 | -0.025567 |

153 f = 5.395905 THz 33.903473 2PiTHz 179.988020 cm-1 22.315678 meV

|    | X         | Y         | Z        | dx        | dy        | dz        |
|----|-----------|-----------|----------|-----------|-----------|-----------|
| Li | 3.769818  | 9.645336  | 4.001386 | 0.010092  | 0.022440  | -0.004986 |
| Li | -1.316675 | 4.156264  | 2.365404 | -0.009248 | -0.024362 | 0.004657  |
| Li | -3.471104 | 2.744536  | 5.548798 | 0.009127  | -0.023809 | -0.004594 |
| Li | 5.924247  | 11.057064 | 0.817991 | -0.009896 | 0.021959  | 0.004993  |

|    |           |           |          |           |           |           |
|----|-----------|-----------|----------|-----------|-----------|-----------|
| Na | 2.049025  | 6.784862  | 1.629696 | -0.016519 | 0.001581  | 0.053167  |
| Na | 0.404117  | 7.016739  | 4.737094 | 0.016703  | -0.001746 | -0.052045 |
| Na | 2.558546  | 13.685662 | 1.553699 | -0.016504 | -0.001520 | 0.051571  |
| Na | -0.105403 | 0.115939  | 4.813091 | 0.016276  | 0.001391  | -0.052640 |
| B  | 4.155007  | 8.978944  | 1.168663 | -0.001103 | -0.013422 | 0.003247  |
| B  | -1.701865 | 4.822656  | 5.198127 | 0.001519  | 0.013382  | -0.003874 |
| B  | 0.452564  | 2.078144  | 2.014732 | -0.001506 | 0.012763  | 0.004314  |
| B  | 2.000578  | 11.723457 | 4.352058 | 0.001141  | -0.012850 | -0.003764 |
| B  | -2.733891 | 11.746082 | 5.839177 | 0.001782  | 0.018607  | 0.000680  |
| B  | 5.187034  | 2.055518  | 0.527613 | -0.002635 | -0.018344 | -0.000359 |
| B  | 3.032605  | 4.845282  | 3.711007 | 0.003028  | -0.017853 | 0.000259  |
| B  | -0.579463 | 8.956318  | 2.655782 | -0.002186 | 0.018110  | -0.000579 |
| B  | -0.983708 | 0.054306  | 1.827988 | 0.006980  | 0.004975  | 0.032833  |
| B  | 3.436850  | 13.747295 | 4.538802 | -0.007444 | -0.005008 | -0.033356 |
| B  | 5.591279  | 6.955106  | 1.355407 | 0.007793  | -0.005606 | 0.033327  |
| B  | -3.138137 | 6.846495  | 5.011383 | -0.007387 | 0.005564  | -0.032783 |
| Si | 0.631772  | 3.486686  | 4.508512 | 0.008071  | -0.002597 | 0.014069  |
| Si | 1.821370  | 10.314915 | 1.858278 | -0.006341 | 0.002809  | -0.013163 |
| Si | -0.333059 | 10.387486 | 5.041673 | 0.006294  | 0.002817  | 0.012985  |
| Si | 2.786201  | 3.414115  | 1.325117 | -0.007978 | -0.002632 | -0.013921 |
| O  | 0.061445  | 3.072947  | 3.041906 | 0.023932  | 0.027237  | -0.001998 |
| O  | 2.391697  | 10.728653 | 3.324884 | -0.022226 | -0.027110 | 0.002993  |
| O  | 4.546126  | 9.973747  | 0.141489 | 0.022849  | -0.027894 | -0.003623 |
| O  | -2.092984 | 3.827853  | 6.225301 | -0.024402 | 0.028059  | 0.002581  |
| O  | 2.197450  | 3.933608  | 4.519003 | 0.010732  | -0.009741 | 0.019010  |
| O  | 0.255692  | 9.867992  | 1.847787 | -0.009148 | 0.010610  | -0.017611 |
| O  | -1.898737 | 10.834409 | 5.031182 | 0.009234  | 0.011254  | 0.017926  |
| O  | 4.351879  | 2.967192  | 1.335608 | -0.010774 | -0.010400 | -0.019247 |
| O  | -0.212316 | 4.798696  | 5.055280 | 0.004530  | -0.007132 | 0.019542  |
| O  | 2.665458  | 9.002905  | 1.311510 | -0.003882 | 0.006436  | -0.018171 |
| O  | 0.511030  | 11.699496 | 4.494905 | 0.003844  | 0.006246  | 0.017333  |
| O  | 1.942113  | 2.102105  | 1.871885 | -0.004464 | -0.007015 | -0.018878 |
| O  | 0.525580  | 2.169271  | 5.472081 | 0.005563  | -0.021948 | -0.006305 |
| O  | 1.927562  | 11.632329 | 0.894709 | -0.003905 | 0.021311  | 0.006046  |
| O  | -0.226867 | 9.070071  | 4.078104 | 0.002746  | 0.021013  | -0.005894 |
| O  | 2.680009  | 4.731529  | 2.288686 | -0.004494 | -0.021731 | 0.006184  |

|   |           |           |          |           |           |           |
|---|-----------|-----------|----------|-----------|-----------|-----------|
| O | 0.058846  | 0.698526  | 2.444964 | -0.007159 | 0.026512  | 0.035047  |
| O | 2.394296  | 13.103075 | 3.921826 | 0.006252  | -0.026402 | -0.034868 |
| O | 4.548725  | 7.599326  | 0.738431 | -0.006181 | -0.027298 | 0.034908  |
| O | -2.095583 | 6.202275  | 5.628359 | 0.007086  | 0.027428  | -0.035129 |
| O | -2.459230 | 13.184059 | 5.445139 | -0.009688 | 0.016504  | -0.017848 |
| O | 4.912372  | 0.617542  | 0.921651 | 0.008449  | -0.015947 | 0.018470  |
| O | 2.757943  | 6.283259  | 4.105046 | -0.008235 | -0.015448 | -0.018988 |
| O | -0.304801 | 7.518342  | 2.261744 | 0.009458  | 0.016000  | 0.018341  |
| O | -0.175430 | 2.374756  | 0.744070 | -0.006528 | -0.004946 | 0.003614  |
| O | 2.628573  | 11.426844 | 5.622720 | 0.005300  | 0.005937  | -0.002271 |
| O | 4.783002  | 9.275557  | 2.439325 | -0.005600 | 0.005515  | 0.001858  |
| O | -2.329859 | 4.526044  | 3.927465 | 0.006825  | -0.004507 | -0.003239 |
| O | -1.223866 | 12.517207 | 2.155216 | 0.032146  | 0.004957  | 0.049693  |
| O | 3.677009  | 1.284394  | 4.211574 | -0.031062 | -0.005583 | -0.051876 |
| O | 5.831438  | 5.616407  | 1.028179 | 0.032759  | -0.005895 | 0.051481  |
| O | -3.378295 | 8.185194  | 5.338611 | -0.033989 | 0.005205  | -0.049134 |
| H | -0.637445 | 12.195109 | 2.878812 | 0.049577  | 0.008028  | 0.038022  |
| H | 3.090587  | 1.606491  | 3.487978 | -0.048218 | -0.008573 | -0.040370 |
| H | 5.245016  | 5.294309  | 0.304583 | 0.050179  | -0.009134 | 0.039868  |
| H | -2.791874 | 8.507292  | 6.062207 | -0.051596 | 0.008523  | -0.037430 |

154 f = 5.275632 THz    33.147772 2PiTHz    175.976129 cm-1    21.818267 meV

|    | X         | Y         | Z        | dx        | dy        | dz        |
|----|-----------|-----------|----------|-----------|-----------|-----------|
| Li | 3.769818  | 9.645336  | 4.001386 | -0.035181 | -0.006242 | -0.013440 |
| Li | -1.316675 | 4.156264  | 2.365404 | -0.035028 | -0.006250 | -0.013446 |
| Li | -3.471104 | 2.744536  | 5.548798 | -0.035065 | 0.006137  | -0.013402 |
| Li | 5.924247  | 11.057064 | 0.817991 | -0.035152 | 0.006173  | -0.013497 |
| Na | 2.049025  | 6.784862  | 1.629696 | 0.019944  | 0.009102  | 0.007943  |
| Na | 0.404117  | 7.016739  | 4.737094 | 0.020302  | 0.009054  | 0.007201  |
| Na | 2.558546  | 13.685662 | 1.553699 | 0.020333  | -0.009022 | 0.007421  |
| Na | -0.105403 | 0.115939  | 4.813091 | 0.019967  | -0.009125 | 0.007858  |
| B  | 4.155007  | 8.978944  | 1.168663 | -0.009681 | 0.000487  | 0.013971  |
| B  | -1.701865 | 4.822656  | 5.198127 | -0.009596 | 0.000454  | 0.013716  |
| B  | 0.452564  | 2.078144  | 2.014732 | -0.009650 | -0.000434 | 0.013758  |

|    |           |           |          |           |           |           |
|----|-----------|-----------|----------|-----------|-----------|-----------|
| B  | 2.000578  | 11.723457 | 4.352058 | -0.009706 | -0.000502 | 0.013957  |
| B  | -2.733891 | 11.746082 | 5.839177 | 0.005638  | -0.013058 | -0.008926 |
| B  | 5.187034  | 2.055518  | 0.527613 | 0.005504  | -0.012899 | -0.008892 |
| B  | 3.032605  | 4.845282  | 3.711007 | 0.005574  | 0.012933  | -0.008909 |
| B  | -0.579463 | 8.956318  | 2.655782 | 0.005652  | 0.013079  | -0.008923 |
| B  | -0.983708 | 0.054306  | 1.827988 | 0.015681  | -0.011083 | -0.000538 |
| B  | 3.436850  | 13.747295 | 4.538802 | 0.015506  | -0.011191 | -0.000477 |
| B  | 5.591279  | 6.955106  | 1.355407 | 0.015490  | 0.011158  | -0.000373 |
| B  | -3.138137 | 6.846495  | 5.011383 | 0.015725  | 0.011090  | -0.000487 |
| Si | 0.631772  | 3.486686  | 4.508512 | -0.014723 | -0.012137 | -0.003780 |
| Si | 1.821370  | 10.314915 | 1.858278 | -0.014777 | -0.012122 | -0.003710 |
| Si | -0.333059 | 10.387486 | 5.041673 | -0.014788 | 0.012129  | -0.003697 |
| Si | 2.786201  | 3.414115  | 1.325117 | -0.014843 | 0.012173  | -0.003829 |
| O  | 0.061445  | 3.072947  | 3.041906 | -0.055694 | -0.017192 | 0.013381  |
| O  | 2.391697  | 10.728653 | 3.324884 | -0.056026 | -0.017326 | 0.013586  |
| O  | 4.546126  | 9.973747  | 0.141489 | -0.055995 | 0.017276  | 0.013562  |
| O  | -2.092984 | 3.827853  | 6.225301 | -0.055763 | 0.017207  | 0.013306  |
| O  | 2.197450  | 3.933608  | 4.519003 | -0.019145 | 0.004761  | -0.044787 |
| O  | 0.255692  | 9.867992  | 1.847787 | -0.019234 | 0.004880  | -0.045005 |
| O  | -1.898737 | 10.834409 | 5.031182 | -0.019261 | -0.004927 | -0.044936 |
| O  | 4.351879  | 2.967192  | 1.335608 | -0.019272 | -0.004729 | -0.044848 |
| O  | -0.212316 | 4.798696  | 5.055280 | -0.008566 | -0.027736 | 0.040425  |
| O  | 2.665458  | 9.002905  | 1.311510 | -0.008620 | -0.027845 | 0.040838  |
| O  | 0.511030  | 11.699496 | 4.494905 | -0.008645 | 0.027852  | 0.040832  |
| O  | 1.942113  | 2.102105  | 1.871885 | -0.008639 | 0.027723  | 0.040343  |
| O  | 0.525580  | 2.169271  | 5.472081 | 0.042868  | -0.029304 | -0.019197 |
| O  | 1.927562  | 11.632329 | 0.894709 | 0.043249  | -0.029398 | -0.019251 |
| O  | -0.226867 | 9.070071  | 4.078104 | 0.043281  | 0.029456  | -0.019277 |
| O  | 2.680009  | 4.731529  | 2.288686 | 0.042763  | 0.029289  | -0.019178 |
| O  | 0.058846  | 0.698526  | 2.444964 | 0.018426  | -0.014250 | -0.003961 |
| O  | 2.394296  | 13.103075 | 3.921826 | 0.018365  | -0.014427 | -0.003954 |
| O  | 4.548725  | 7.599326  | 0.738431 | 0.018379  | 0.014402  | -0.003888 |
| O  | -2.095583 | 6.202275  | 5.628359 | 0.018501  | 0.014258  | -0.003963 |
| O  | -2.459230 | 13.184059 | 5.445139 | 0.009582  | -0.009827 | 0.004862  |
| O  | 4.912372  | 0.617542  | 0.921651 | 0.009524  | -0.009697 | 0.005011  |
| O  | 2.757943  | 6.283259  | 4.105046 | 0.009600  | 0.009740  | 0.005002  |

|   |           |           |          |           |           |           |
|---|-----------|-----------|----------|-----------|-----------|-----------|
| O | -0.304801 | 7.518342  | 2.261744 | 0.009558  | 0.009809  | 0.004969  |
| O | -0.175430 | 2.374756  | 0.744070 | -0.000396 | -0.002005 | 0.009839  |
| O | 2.628573  | 11.426844 | 5.622720 | -0.000272 | -0.002102 | 0.009960  |
| O | 4.783002  | 9.275557  | 2.439325 | -0.000252 | 0.002151  | 0.009967  |
| O | -2.329859 | 4.526044  | 3.927465 | -0.000298 | 0.002097  | 0.009747  |
| O | -1.223866 | 12.517207 | 2.155216 | 0.017504  | -0.011402 | -0.002777 |
| O | 3.677009  | 1.284394  | 4.211574 | 0.016930  | -0.011395 | -0.002489 |
| O | 5.831438  | 5.616407  | 1.028179 | 0.016895  | 0.011353  | -0.002341 |
| O | -3.378295 | 8.185194  | 5.338611 | 0.017496  | 0.011370  | -0.002619 |
| H | -0.637445 | 12.195109 | 2.878812 | 0.011763  | -0.008345 | 0.002456  |
| H | 3.090587  | 1.606491  | 3.487978 | 0.011193  | -0.008430 | 0.002708  |
| H | 5.245016  | 5.294309  | 0.304583 | 0.011185  | 0.008434  | 0.002812  |
| H | -2.791874 | 8.507292  | 6.062207 | 0.011793  | 0.008304  | 0.002590  |

155 f = 5.062724 THz 31.810031 2PiTHz 168.874279 cm-1 20.937750  
meV

|    | X         | Y         | Z        | dx        | dy        | dz        |
|----|-----------|-----------|----------|-----------|-----------|-----------|
| Li | 3.769818  | 9.645336  | 4.001386 | 0.006431  | 0.004778  | -0.004164 |
| Li | -1.316675 | 4.156264  | 2.365404 | 0.007490  | 0.005295  | -0.005266 |
| Li | -3.471104 | 2.744536  | 5.548798 | -0.007442 | 0.005082  | 0.005199  |
| Li | 5.924247  | 11.057064 | 0.817991 | -0.006468 | 0.004722  | 0.004086  |
| Na | 2.049025  | 6.784862  | 1.629696 | 0.014275  | -0.023789 | 0.033415  |
| Na | 0.404117  | 7.016739  | 4.737094 | 0.014111  | -0.024161 | 0.034215  |
| Na | 2.558546  | 13.685662 | 1.553699 | -0.014098 | -0.024350 | -0.033632 |
| Na | -0.105403 | 0.115939  | 4.813091 | -0.014122 | -0.023623 | -0.033888 |
| B  | 4.155007  | 8.978944  | 1.168663 | -0.012670 | 0.003616  | 0.001617  |
| B  | -1.701865 | 4.822656  | 5.198127 | -0.012486 | 0.003211  | 0.001341  |
| B  | 0.452564  | 2.078144  | 2.014732 | 0.012407  | 0.003265  | -0.001256 |
| B  | 2.000578  | 11.723457 | 4.352058 | 0.012646  | 0.003631  | -0.001656 |
| B  | -2.733891 | 11.746082 | 5.839177 | 0.003227  | -0.005329 | -0.005346 |
| B  | 5.187034  | 2.055518  | 0.527613 | 0.002801  | -0.004721 | -0.004843 |
| B  | 3.032605  | 4.845282  | 3.711007 | -0.002857 | -0.004747 | 0.004903  |
| B  | -0.579463 | 8.956318  | 2.655782 | -0.003312 | -0.005362 | 0.005393  |
| B  | -0.983708 | 0.054306  | 1.827988 | 0.003465  | 0.012422  | 0.020728  |
| B  | 3.436850  | 13.747295 | 4.538802 | 0.003966  | 0.012704  | 0.021853  |

|    |           |           |          |           |           |           |
|----|-----------|-----------|----------|-----------|-----------|-----------|
| B  | 5.591279  | 6.955106  | 1.355407 | -0.003697 | 0.012772  | -0.021962 |
| B  | -3.138137 | 6.846495  | 5.011383 | -0.003520 | 0.012403  | -0.020789 |
| Si | 0.631772  | 3.486686  | 4.508512 | 0.006234  | -0.004677 | 0.009656  |
| Si | 1.821370  | 10.314915 | 1.858278 | 0.005726  | -0.004944 | 0.009553  |
| Si | -0.333059 | 10.387486 | 5.041673 | -0.005826 | -0.004805 | -0.009583 |
| Si | 2.786201  | 3.414115  | 1.325117 | -0.006289 | -0.004783 | -0.009571 |
| O  | 0.061445  | 3.072947  | 3.041906 | 0.039583  | 0.030390  | -0.014244 |
| O  | 2.391697  | 10.728653 | 3.324884 | 0.039954  | 0.031338  | -0.015099 |
| O  | 4.546126  | 9.973747  | 0.141489 | -0.040075 | 0.031391  | 0.015065  |
| O  | -2.092984 | 3.827853  | 6.225301 | -0.039578 | 0.030235  | 0.014283  |
| O  | 2.197450  | 3.933608  | 4.519003 | -0.003796 | 0.030140  | 0.042215  |
| O  | 0.255692  | 9.867992  | 1.847787 | -0.004296 | 0.029728  | 0.042649  |
| O  | -1.898737 | 10.834409 | 5.031182 | 0.004195  | 0.029828  | -0.042687 |
| O  | 4.351879  | 2.967192  | 1.335608 | 0.003770  | 0.030105  | -0.042042 |
| O  | -0.212316 | 4.798696  | 5.055280 | -0.013116 | -0.021416 | 0.023181  |
| O  | 2.665458  | 9.002905  | 1.311510 | -0.013443 | -0.021619 | 0.023210  |
| O  | 0.511030  | 11.699496 | 4.494905 | 0.013398  | -0.021510 | -0.023277 |
| O  | 1.942113  | 2.102105  | 1.871885 | 0.013053  | -0.021507 | -0.023072 |
| O  | 0.525580  | 2.169271  | 5.472081 | 0.019231  | -0.028909 | -0.016552 |
| O  | 1.927562  | 11.632329 | 0.894709 | 0.018749  | -0.029598 | -0.017019 |
| O  | -0.226867 | 9.070071  | 4.078104 | -0.018895 | -0.029514 | 0.017057  |
| O  | 2.680009  | 4.731529  | 2.288686 | -0.019317 | -0.029016 | 0.016629  |
| O  | 0.058846  | 0.698526  | 2.444964 | -0.001912 | 0.019172  | 0.024050  |
| O  | 2.394296  | 13.103075 | 3.921826 | -0.001723 | 0.020105  | 0.024957  |
| O  | 4.548725  | 7.599326  | 0.738431 | 0.001897  | 0.020106  | -0.025020 |
| O  | -2.095583 | 6.202275  | 5.628359 | 0.001714  | 0.019078  | -0.023927 |
| O  | -2.459230 | 13.184059 | 5.445139 | -0.010054 | 0.009590  | 0.032709  |
| O  | 4.912372  | 0.617542  | 0.921651 | -0.010786 | 0.010155  | 0.032449  |
| O  | 2.757943  | 6.283259  | 4.105046 | 0.010749  | 0.010144  | -0.032503 |
| O  | -0.304801 | 7.518342  | 2.261744 | 0.010070  | 0.009599  | -0.032584 |
| O  | -0.175430 | 2.374756  | 0.744070 | 0.003319  | -0.011558 | -0.000145 |
| O  | 2.628573  | 11.426844 | 5.622720 | 0.003837  | -0.012292 | -0.001032 |
| O  | 4.783002  | 9.275557  | 2.439325 | -0.003922 | -0.012323 | 0.001000  |
| O  | -2.329859 | 4.526044  | 3.927465 | -0.003354 | -0.011584 | 0.000194  |
| O  | -1.223866 | 12.517207 | 2.155216 | 0.034077  | 0.005002  | 0.006740  |
| O  | 3.677009  | 1.284394  | 4.211574 | 0.034934  | 0.005529  | 0.009067  |



|   |           |           |          |           |           |           |
|---|-----------|-----------|----------|-----------|-----------|-----------|
| O | 5.831438  | 5.616407  | 1.028179 | -0.034241 | 0.005726  | -0.009465 |
| O | -3.378295 | 8.185194  | 5.338611 | -0.033981 | 0.005051  | -0.006956 |
| H | -0.637445 | 12.195109 | 2.878812 | 0.049322  | -0.002208 | -0.008016 |
| H | 3.090587  | 1.606491  | 3.487978 | 0.051053  | -0.001391 | -0.006199 |
| H | 5.245016  | 5.294309  | 0.304583 | -0.050321 | -0.001314 | 0.005828  |
| H | -2.791874 | 8.507292  | 6.062207 | -0.049247 | -0.002174 | 0.007822  |

156 f = 5.002737 THz 31.433126 2PiTHz 166.873349 cm-1 20.689666 meV

|    | X         | Y         | Z        | dx        | dy        | dz        |
|----|-----------|-----------|----------|-----------|-----------|-----------|
| Li | 3.769818  | 9.645336  | 4.001386 | 0.029864  | -0.008631 | -0.044207 |
| Li | -1.316675 | 4.156264  | 2.365404 | -0.029843 | 0.009376  | 0.043922  |
| Li | -3.471104 | 2.744536  | 5.548798 | 0.029764  | 0.008858  | -0.044210 |
| Li | 5.924247  | 11.057064 | 0.817991 | -0.029892 | -0.009143 | 0.043938  |
| Na | 2.049025  | 6.784862  | 1.629696 | -0.002734 | -0.010407 | -0.007809 |
| Na | 0.404117  | 7.016739  | 4.737094 | 0.003418  | 0.009788  | 0.008528  |
| Na | 2.558546  | 13.685662 | 1.553699 | -0.003096 | 0.009740  | -0.008297 |
| Na | -0.105403 | 0.115939  | 4.813091 | 0.003034  | -0.010517 | 0.007980  |
| B  | 4.155007  | 8.978944  | 1.168663 | 0.016093  | -0.003171 | -0.025692 |
| B  | -1.701865 | 4.822656  | 5.198127 | -0.016702 | 0.003047  | 0.025878  |
| B  | 0.452564  | 2.078144  | 2.014732 | 0.016418  | 0.003278  | -0.025782 |
| B  | 2.000578  | 11.723457 | 4.352058 | -0.016361 | -0.002967 | 0.025785  |
| B  | -2.733891 | 11.746082 | 5.839177 | -0.021119 | 0.002614  | 0.021430  |
| B  | 5.187034  | 2.055518  | 0.527613 | 0.020935  | -0.002662 | -0.021439 |
| B  | 3.032605  | 4.845282  | 3.711007 | -0.021260 | -0.002711 | 0.021615  |
| B  | -0.579463 | 8.956318  | 2.655782 | 0.020792  | 0.002554  | -0.021227 |
| B  | -0.983708 | 0.054306  | 1.827988 | 0.008461  | 0.009429  | 0.003810  |
| B  | 3.436850  | 13.747295 | 4.538802 | -0.007898 | -0.009173 | -0.003615 |
| B  | 5.591279  | 6.955106  | 1.355407 | 0.008356  | -0.009080 | 0.003313  |
| B  | -3.138137 | 6.846495  | 5.011383 | -0.007984 | 0.009511  | -0.004116 |
| Si | 0.631772  | 3.486686  | 4.508512 | -0.030536 | -0.000407 | -0.015645 |
| Si | 1.821370  | 10.314915 | 1.858278 | 0.030233  | 0.000332  | 0.015902  |
| Si | -0.333059 | 10.387486 | 5.041673 | -0.030579 | 0.000274  | -0.015785 |
| Si | 2.786201  | 3.414115  | 1.325117 | 0.030181  | -0.000447 | 0.015744  |
| O  | 0.061445  | 3.072947  | 3.041906 | -0.002741 | 0.011262  | -0.032380 |

|   |           |           |          |           |           |           |
|---|-----------|-----------|----------|-----------|-----------|-----------|
| O | 2.391697  | 10.728653 | 3.324884 | 0.003494  | -0.010059 | 0.031845  |
| O | 4.546126  | 9.973747  | 0.141489 | -0.003608 | -0.010463 | -0.031909 |
| O | -2.092984 | 3.827853  | 6.225301 | 0.002575  | 0.010824  | 0.032300  |
| O | 2.197450  | 3.933608  | 4.519003 | -0.034190 | 0.006323  | 0.007273  |
| O | 0.255692  | 9.867992  | 1.847787 | 0.033673  | -0.005518 | -0.005872 |
| O | -1.898737 | 10.834409 | 5.031182 | -0.033969 | -0.005576 | 0.006285  |
| O | 4.351879  | 2.967192  | 1.335608 | 0.033887  | 0.006274  | -0.006924 |
| O | -0.212316 | 4.798696  | 5.055280 | -0.023919 | 0.003168  | -0.010915 |
| O | 2.665458  | 9.002905  | 1.311510 | 0.023249  | -0.003606 | 0.011384  |
| O | 0.511030  | 11.699496 | 4.494905 | -0.023537 | -0.003693 | -0.011409 |
| O | 1.942113  | 2.102105  | 1.871885 | 0.023622  | 0.003129  | 0.010942  |
| O | 0.525580  | 2.169271  | 5.472081 | -0.023341 | -0.000838 | -0.013568 |
| O | 1.927562  | 11.632329 | 0.894709 | 0.023164  | 0.000282  | 0.013331  |
| O | -0.226867 | 9.070071  | 4.078104 | -0.023739 | 0.000135  | -0.013098 |
| O | 2.680009  | 4.731529  | 2.288686 | 0.022810  | -0.000935 | 0.013753  |
| O | 0.058846  | 0.698526  | 2.444964 | 0.019656  | 0.007888  | -0.013920 |
| O | 2.394296  | 13.103075 | 3.921826 | -0.019934 | -0.006999 | 0.014813  |
| O | 4.548725  | 7.599326  | 0.738431 | 0.019706  | -0.007376 | -0.014532 |
| O | -2.095583 | 6.202275  | 5.628359 | -0.019881 | 0.007486  | 0.014210  |
| O | -2.459230 | 13.184059 | 5.445139 | -0.016485 | 0.000184  | 0.011553  |
| O | 4.912372  | 0.617542  | 0.921651 | 0.016291  | -0.000068 | -0.010788 |
| O | 2.757943  | 6.283259  | 4.105046 | -0.016286 | 0.000070  | 0.010851  |
| O | -0.304801 | 7.518342  | 2.261744 | 0.016501  | 0.000331  | -0.011515 |
| O | -0.175430 | 2.374756  | 0.744070 | 0.030771  | -0.022019 | -0.042314 |
| O | 2.628573  | 11.426844 | 5.622720 | -0.030887 | 0.021766  | 0.042177  |
| O | 4.783002  | 9.275557  | 2.439325 | 0.030571  | 0.021647  | -0.042162 |
| O | -2.329859 | 4.526044  | 3.927465 | -0.031079 | -0.022126 | 0.042316  |
| O | -1.223866 | 12.517207 | 2.155216 | -0.009956 | 0.021367  | 0.042945  |
| O | 3.677009  | 1.284394  | 4.211574 | 0.012650  | -0.021715 | -0.043959 |
| O | 5.831438  | 5.616407  | 1.028179 | -0.010763 | -0.021196 | 0.042815  |
| O | -3.378295 | 8.185194  | 5.338611 | 0.011913  | 0.021888  | -0.044124 |
| H | -0.637445 | 12.195109 | 2.878812 | 0.006190  | 0.027973  | 0.034385  |
| H | 3.090587  | 1.606491  | 3.487978 | -0.003051 | -0.028150 | -0.035653 |
| H | 5.245016  | 5.294309  | 0.304583 | 0.005073  | -0.027997 | 0.034577  |
| H | -2.791874 | 8.507292  | 6.062207 | -0.004091 | 0.028129  | -0.035501 |

157 f = 4.963919 THz 31.189222 2PiTHz 165.578502 cm-1 20.529125  
meV

|    | X         | Y         | Z        | dx        | dy        | dz        |
|----|-----------|-----------|----------|-----------|-----------|-----------|
| Li | 3.769818  | 9.645336  | 4.001386 | -0.000839 | 0.024884  | -0.011678 |
| Li | -1.316675 | 4.156264  | 2.365404 | -0.000036 | 0.024143  | -0.012466 |
| Li | -3.471104 | 2.744536  | 5.548798 | -0.000672 | -0.024515 | -0.011456 |
| Li | 5.924247  | 11.057064 | 0.817991 | -0.000194 | -0.024664 | -0.012609 |
| Na | 2.049025  | 6.784862  | 1.629696 | 0.014539  | 0.001254  | 0.011138  |
| Na | 0.404117  | 7.016739  | 4.737094 | 0.014941  | 0.000587  | 0.009128  |
| Na | 2.558546  | 13.685662 | 1.553699 | 0.015051  | -0.000698 | 0.009535  |
| Na | -0.105403 | 0.115939  | 4.813091 | 0.014576  | -0.000803 | 0.011055  |
| B  | 4.155007  | 8.978944  | 1.168663 | -0.012132 | -0.010638 | 0.003786  |
| B  | -1.701865 | 4.822656  | 5.198127 | -0.011573 | -0.010414 | 0.002989  |
| B  | 0.452564  | 2.078144  | 2.014732 | -0.012059 | 0.010308  | 0.003605  |
| B  | 2.000578  | 11.723457 | 4.352058 | -0.011790 | 0.010747  | 0.003295  |
| B  | -2.733891 | 11.746082 | 5.839177 | -0.014771 | 0.004316  | 0.008517  |
| B  | 5.187034  | 2.055518  | 0.527613 | -0.015342 | 0.004397  | 0.008958  |
| B  | 3.032605  | 4.845282  | 3.711007 | -0.014776 | -0.004319 | 0.008442  |
| B  | -0.579463 | 8.956318  | 2.655782 | -0.015280 | -0.004375 | 0.008886  |
| B  | -0.983708 | 0.054306  | 1.827988 | 0.019004  | -0.002059 | -0.012713 |
| B  | 3.436850  | 13.747295 | 4.538802 | 0.019230  | -0.001653 | -0.012425 |
| B  | 5.591279  | 6.955106  | 1.355407 | 0.018754  | 0.001695  | -0.012340 |
| B  | -3.138137 | 6.846495  | 5.011383 | 0.019404  | 0.001837  | -0.012635 |
| Si | 0.631772  | 3.486686  | 4.508512 | -0.014281 | 0.002382  | 0.004587  |
| Si | 1.821370  | 10.314915 | 1.858278 | -0.015082 | 0.002448  | 0.004369  |
| Si | -0.333059 | 10.387486 | 5.041673 | -0.014335 | -0.002411 | 0.004710  |
| Si | 2.786201  | 3.414115  | 1.325117 | -0.015061 | -0.002352 | 0.004255  |
| O  | 0.061445  | 3.072947  | 3.041906 | -0.003533 | 0.020462  | -0.004303 |
| O  | 2.391697  | 10.728653 | 3.324884 | -0.004014 | 0.021077  | -0.004886 |
| O  | 4.546126  | 9.973747  | 0.141489 | -0.003654 | -0.021040 | -0.004349 |
| O  | -2.092984 | 3.827853  | 6.225301 | -0.003514 | -0.020804 | -0.005117 |
| O  | 2.197450  | 3.933608  | 4.519003 | -0.011273 | -0.000548 | 0.017797  |
| O  | 0.255692  | 9.867992  | 1.847787 | -0.012092 | -0.000617 | 0.017628  |
| O  | -1.898737 | 10.834409 | 5.031182 | -0.011362 | 0.000473  | 0.017817  |
| O  | 4.351879  | 2.967192  | 1.335608 | -0.012186 | 0.000268  | 0.018088  |

|   |           |           |          |           |           |           |
|---|-----------|-----------|----------|-----------|-----------|-----------|
| O | -0.212316 | 4.798696  | 5.055280 | -0.012072 | 0.003685  | -0.002048 |
| O | 2.665458  | 9.002905  | 1.311510 | -0.012706 | 0.003673  | -0.001726 |
| O | 0.511030  | 11.699496 | 4.494905 | -0.012237 | -0.003382 | -0.001308 |
| O | 1.942113  | 2.102105  | 1.871885 | -0.012741 | -0.003722 | -0.002280 |
| O | 0.525580  | 2.169271  | 5.472081 | -0.026457 | 0.006919  | 0.010027  |
| O | 1.927562  | 11.632329 | 0.894709 | -0.026711 | 0.006782  | 0.009681  |
| O | -0.226867 | 9.070071  | 4.078104 | -0.026079 | -0.006601 | 0.009789  |
| O | 2.680009  | 4.731529  | 2.288686 | -0.026981 | -0.006791 | 0.009668  |
| O | 0.058846  | 0.698526  | 2.444964 | -0.011686 | 0.019127  | 0.013599  |
| O | 2.394296  | 13.103075 | 3.921826 | -0.011286 | 0.019641  | 0.013543  |
| O | 4.548725  | 7.599326  | 0.738431 | -0.011939 | -0.019564 | 0.013984  |
| O | -2.095583 | 6.202275  | 5.628359 | -0.011096 | -0.019379 | 0.013315  |
| O | -2.459230 | 13.184059 | 5.445139 | -0.001290 | -0.003623 | 0.003694  |
| O | 4.912372  | 0.617542  | 0.921651 | -0.001750 | -0.003701 | 0.003787  |
| O | 2.757943  | 6.283259  | 4.105046 | -0.001299 | 0.003678  | 0.003650  |
| O | -0.304801 | 7.518342  | 2.261744 | -0.001950 | 0.003462  | 0.004123  |
| O | -0.175430 | 2.374756  | 0.744070 | -0.014143 | 0.005797  | -0.000232 |
| O | 2.628573  | 11.426844 | 5.622720 | -0.013345 | 0.005432  | -0.001043 |
| O | 4.783002  | 9.275557  | 2.439325 | -0.014029 | -0.005746 | -0.000198 |
| O | -2.329859 | 4.526044  | 3.927465 | -0.013339 | -0.005247 | -0.001248 |
| O | -1.223866 | 12.517207 | 2.155216 | 0.083602  | -0.021583 | -0.052492 |
| O | 3.677009  | 1.284394  | 4.211574 | 0.083573  | -0.020895 | -0.051207 |
| O | 5.831438  | 5.616407  | 1.028179 | 0.083463  | 0.021208  | -0.052013 |
| O | -3.378295 | 8.185194  | 5.338611 | 0.083831  | 0.021147  | -0.051682 |
| H | -0.637445 | 12.195109 | 2.878812 | 0.088256  | -0.005790 | -0.048502 |
| H | 3.090587  | 1.606491  | 3.487978 | 0.088777  | -0.005071 | -0.047586 |
| H | 5.245016  | 5.294309  | 0.304583 | 0.088327  | 0.005644  | -0.048277 |
| H | -2.791874 | 8.507292  | 6.062207 | 0.088887  | 0.005247  | -0.047929 |

158 f = 4.877448 THz 30.645907 2PiTHz 162.694136 cm-1 20.171509 meV

|    | X         | Y        | Z        | dx        | dy        | dz        |
|----|-----------|----------|----------|-----------|-----------|-----------|
| Li | 3.769818  | 9.645336 | 4.001386 | 0.010232  | -0.018345 | 0.010458  |
| Li | -1.316675 | 4.156264 | 2.365404 | -0.010903 | 0.018691  | -0.010485 |
| Li | -3.471104 | 2.744536 | 5.548798 | -0.010693 | -0.018623 | -0.010729 |

|    |           |           |          |           |           |           |
|----|-----------|-----------|----------|-----------|-----------|-----------|
| Li | 5.924247  | 11.057064 | 0.817991 | 0.010479  | 0.018426  | 0.010154  |
| Na | 2.049025  | 6.784862  | 1.629696 | 0.006779  | -0.017124 | -0.083721 |
| Na | 0.404117  | 7.016739  | 4.737094 | -0.007096 | 0.015938  | 0.080809  |
| Na | 2.558546  | 13.685662 | 1.553699 | -0.007015 | -0.015975 | 0.081304  |
| Na | -0.105403 | 0.115939  | 4.813091 | 0.006901  | 0.017112  | -0.083292 |
| B  | 4.155007  | 8.978944  | 1.168663 | 0.007132  | 0.013309  | -0.012662 |
| B  | -1.701865 | 4.822656  | 5.198127 | -0.007610 | -0.013714 | 0.013431  |
| B  | 0.452564  | 2.078144  | 2.014732 | -0.007597 | 0.013677  | 0.013269  |
| B  | 2.000578  | 11.723457 | 4.352058 | 0.007155  | -0.013320 | -0.012844 |
| B  | -2.733891 | 11.746082 | 5.839177 | -0.002901 | 0.003984  | 0.001234  |
| B  | 5.187034  | 2.055518  | 0.527613 | 0.002900  | -0.004277 | -0.001098 |
| B  | 3.032605  | 4.845282  | 3.711007 | 0.002797  | 0.004300  | -0.000940 |
| B  | -0.579463 | 8.956318  | 2.655782 | -0.003018 | -0.003935 | 0.001415  |
| B  | -0.983708 | 0.054306  | 1.827988 | -0.008293 | 0.009509  | 0.015220  |
| B  | 3.436850  | 13.747295 | 4.538802 | 0.009118  | -0.009997 | -0.016124 |
| B  | 5.591279  | 6.955106  | 1.355407 | 0.009088  | 0.009994  | -0.015872 |
| B  | -3.138137 | 6.846495  | 5.011383 | -0.008350 | -0.009556 | 0.015504  |
| Si | 0.631772  | 3.486686  | 4.508512 | -0.002709 | 0.002033  | 0.005622  |
| Si | 1.821370  | 10.314915 | 1.858278 | 0.002126  | -0.001893 | -0.005222 |
| Si | -0.333059 | 10.387486 | 5.041673 | 0.002339  | 0.001913  | -0.005029 |
| Si | 2.786201  | 3.414115  | 1.325117 | -0.002516 | -0.002036 | 0.005801  |
| O  | 0.061445  | 3.072947  | 3.041906 | -0.018887 | 0.017647  | 0.005976  |
| O  | 2.391697  | 10.728653 | 3.324884 | 0.017981  | -0.017481 | -0.005490 |
| O  | 4.546126  | 9.973747  | 0.141489 | 0.018165  | 0.017444  | -0.005289 |
| O  | -2.092984 | 3.827853  | 6.225301 | -0.018696 | -0.017728 | 0.006145  |
| O  | 2.197450  | 3.933608  | 4.519003 | -0.002049 | -0.002268 | -0.013398 |
| O  | 0.255692  | 9.867992  | 1.847787 | 0.001265  | 0.003111  | 0.013905  |
| O  | -1.898737 | 10.834409 | 5.031182 | 0.001475  | -0.003160 | 0.014004  |
| O  | 4.351879  | 2.967192  | 1.335608 | -0.001868 | 0.002175  | -0.013276 |
| O  | -0.212316 | 4.798696  | 5.055280 | -0.003628 | -0.010271 | 0.034507  |
| O  | 2.665458  | 9.002905  | 1.311510 | 0.003040  | 0.010047  | -0.033648 |
| O  | 0.511030  | 11.699496 | 4.494905 | 0.003133  | -0.009970 | -0.033458 |
| O  | 1.942113  | 2.102105  | 1.871885 | -0.003554 | 0.010327  | 0.034686  |
| O  | 0.525580  | 2.169271  | 5.472081 | 0.020240  | -0.010997 | -0.007334 |
| O  | 1.927562  | 11.632329 | 0.894709 | -0.020375 | 0.011081  | 0.007603  |
| O  | -0.226867 | 9.070071  | 4.078104 | -0.020154 | -0.010947 | 0.007679  |

|   |           |           |          |           |           |           |
|---|-----------|-----------|----------|-----------|-----------|-----------|
| O | 2.680009  | 4.731529  | 2.288686 | 0.020442  | 0.011119  | -0.007280 |
| O | 0.058846  | 0.698526  | 2.444964 | -0.009697 | 0.014016  | 0.016046  |
| O | 2.394296  | 13.103075 | 3.921826 | 0.009648  | -0.013795 | -0.016219 |
| O | 4.548725  | 7.599326  | 0.738431 | 0.009618  | 0.013742  | -0.016002 |
| O | -2.095583 | 6.202275  | 5.628359 | -0.009736 | -0.014107 | 0.016266  |
| O | -2.459230 | 13.184059 | 5.445139 | 0.002425  | -0.003408 | -0.009205 |
| O | 4.912372  | 0.617542  | 0.921651 | -0.001714 | 0.002772  | 0.008355  |
| O | 2.757943  | 6.283259  | 4.105046 | -0.001853 | -0.002809 | 0.008709  |
| O | -0.304801 | 7.518342  | 2.261744 | 0.002304  | 0.003404  | -0.008862 |
| O | -0.175430 | 2.374756  | 0.744070 | 0.003010  | 0.001097  | 0.006684  |
| O | 2.628573  | 11.426844 | 5.622720 | -0.003130 | -0.000666 | -0.006468 |
| O | 4.783002  | 9.275557  | 2.439325 | -0.003323 | 0.000570  | -0.006156 |
| O | -2.329859 | 4.526044  | 3.927465 | 0.002843  | -0.001187 | 0.006954  |
| O | -1.223866 | 12.517207 | 2.155216 | -0.010691 | 0.012437  | 0.027128  |
| O | 3.677009  | 1.284394  | 4.211574 | 0.012834  | -0.013201 | -0.028599 |
| O | 5.831438  | 5.616407  | 1.028179 | 0.013008  | 0.013217  | -0.028323 |
| O | -3.378295 | 8.185194  | 5.338611 | -0.010580 | -0.012477 | 0.027485  |
| H | -0.637445 | 12.195109 | 2.878812 | -0.000950 | 0.004766  | 0.017007  |
| H | 3.090587  | 1.606491  | 3.487978 | 0.002997  | -0.005268 | -0.018288 |
| H | 5.245016  | 5.294309  | 0.304583 | 0.003382  | 0.005262  | -0.018157 |
| H | -2.791874 | 8.507292  | 6.062207 | -0.000600 | -0.004829 | 0.017198  |

159 f = 4.752630 THz      29.861657 2PiTHz      158.530681 cm-1      19.655306 meV

|    | X         | Y         | Z        | dx        | dy        | dz        |
|----|-----------|-----------|----------|-----------|-----------|-----------|
| Li | 3.769818  | 9.645336  | 4.001386 | -0.021948 | 0.009099  | 0.035988  |
| Li | -1.316675 | 4.156264  | 2.365404 | -0.021978 | 0.008445  | 0.036022  |
| Li | -3.471104 | 2.744536  | 5.548798 | 0.022201  | 0.008588  | -0.035811 |
| Li | 5.924247  | 11.057064 | 0.817991 | 0.021706  | 0.008895  | -0.036241 |
| Na | 2.049025  | 6.784862  | 1.629696 | 0.001314  | -0.027987 | -0.034004 |
| Na | 0.404117  | 7.016739  | 4.737094 | 0.001417  | -0.027117 | -0.033587 |
| Na | 2.558546  | 13.685662 | 1.553699 | -0.001424 | -0.027251 | 0.033290  |
| Na | -0.105403 | 0.115939  | 4.813091 | -0.001225 | -0.027900 | 0.034417  |
| B  | 4.155007  | 8.978944  | 1.168663 | -0.011268 | -0.000312 | 0.023380  |
| B  | -1.701865 | 4.822656  | 5.198127 | -0.010776 | 0.000057  | 0.022879  |

|    |           |           |          |           |           |           |
|----|-----------|-----------|----------|-----------|-----------|-----------|
| B  | 0.452564  | 2.078144  | 2.014732 | 0.010840  | -0.000049 | -0.023008 |
| B  | 2.000578  | 11.723457 | 4.352058 | 0.011165  | -0.000180 | -0.023277 |
| B  | -2.733891 | 11.746082 | 5.839177 | 0.014713  | 0.007285  | -0.025179 |
| B  | 5.187034  | 2.055518  | 0.527613 | 0.014484  | 0.006907  | -0.025129 |
| B  | 3.032605  | 4.845282  | 3.711007 | -0.014552 | 0.006761  | 0.025182  |
| B  | -0.579463 | 8.956318  | 2.655782 | -0.014705 | 0.007418  | 0.025126  |
| B  | -0.983708 | 0.054306  | 1.827988 | 0.007409  | 0.007277  | -0.028976 |
| B  | 3.436850  | 13.747295 | 4.538802 | 0.007464  | 0.007318  | -0.029513 |
| B  | 5.591279  | 6.955106  | 1.355407 | -0.007412 | 0.007277  | 0.029807  |
| B  | -3.138137 | 6.846495  | 5.011383 | -0.007425 | 0.007316  | 0.028661  |
| Si | 0.631772  | 3.486686  | 4.508512 | -0.019020 | 0.000858  | -0.015663 |
| Si | 1.821370  | 10.314915 | 1.858278 | -0.019399 | 0.000845  | -0.015925 |
| Si | -0.333059 | 10.387486 | 5.041673 | 0.019309  | 0.000995  | 0.015885  |
| Si | 2.786201  | 3.414115  | 1.325117 | 0.019057  | 0.000693  | 0.015678  |
| O  | 0.061445  | 3.072947  | 3.041906 | 0.004570  | 0.009860  | -0.029276 |
| O  | 2.391697  | 10.728653 | 3.324884 | 0.003885  | 0.009238  | -0.029264 |
| O  | 4.546126  | 9.973747  | 0.141489 | -0.004267 | 0.009076  | 0.029236  |
| O  | -2.092984 | 3.827853  | 6.225301 | -0.004182 | 0.009936  | 0.029240  |
| O  | 2.197450  | 3.933608  | 4.519003 | -0.025737 | 0.018434  | 0.017072  |
| O  | 0.255692  | 9.867992  | 1.847787 | -0.026292 | 0.019050  | 0.016511  |
| O  | -1.898737 | 10.834409 | 5.031182 | 0.026197  | 0.019148  | -0.016914 |
| O  | 4.351879  | 2.967192  | 1.335608 | 0.025792  | 0.018330  | -0.016629 |
| O  | -0.212316 | 4.798696  | 5.055280 | -0.019544 | -0.004624 | -0.006937 |
| O  | 2.665458  | 9.002905  | 1.311510 | -0.020030 | -0.004806 | -0.006859 |
| O  | 0.511030  | 11.699496 | 4.494905 | 0.019972  | -0.004510 | 0.007229  |
| O  | 1.942113  | 2.102105  | 1.871885 | 0.019559  | -0.004947 | 0.006509  |
| O  | 0.525580  | 2.169271  | 5.472081 | -0.011325 | -0.001444 | -0.020315 |
| O  | 1.927562  | 11.632329 | 0.894709 | -0.010950 | -0.001355 | -0.020420 |
| O  | -0.226867 | 9.070071  | 4.078104 | 0.011237  | -0.001013 | 0.020228  |
| O  | 2.680009  | 4.731529  | 2.288686 | 0.010934  | -0.001817 | 0.020510  |
| O  | 0.058846  | 0.698526  | 2.444964 | 0.004476  | 0.001830  | -0.019169 |
| O  | 2.394296  | 13.103075 | 3.921826 | 0.005328  | 0.001234  | -0.020341 |
| O  | 4.548725  | 7.599326  | 0.738431 | -0.005285 | 0.001083  | 0.020540  |
| O  | -2.095583 | 6.202275  | 5.628359 | -0.004574 | 0.001907  | 0.019010  |
| O  | -2.459230 | 13.184059 | 5.445139 | 0.005658  | 0.011562  | -0.024434 |
| O  | 4.912372  | 0.617542  | 0.921651 | 0.005915  | 0.010944  | -0.024623 |

|   |           |           |          |           |           |           |
|---|-----------|-----------|----------|-----------|-----------|-----------|
| O | 2.757943  | 6.283259  | 4.105046 | -0.005901 | 0.010930  | 0.024328  |
| O | -0.304801 | 7.518342  | 2.261744 | -0.005697 | 0.011596  | 0.024741  |
| O | -0.175430 | 2.374756  | 0.744070 | 0.023203  | -0.012748 | -0.034687 |
| O | 2.628573  | 11.426844 | 5.622720 | 0.023587  | -0.012683 | -0.034903 |
| O | 4.783002  | 9.275557  | 2.439325 | -0.023579 | -0.012564 | 0.034899  |
| O | -2.329859 | 4.526044  | 3.927465 | -0.023260 | -0.012863 | 0.034651  |
| O | -1.223866 | 12.517207 | 2.155216 | 0.004671  | 0.002029  | -0.052328 |
| O | 3.677009  | 1.284394  | 4.211574 | 0.004131  | 0.002179  | -0.052695 |
| O | 5.831438  | 5.616407  | 1.028179 | -0.003891 | 0.002134  | 0.053122  |
| O | -3.378295 | 8.185194  | 5.338611 | -0.004683 | 0.002121  | 0.051799  |
| H | -0.637445 | 12.195109 | 2.878812 | -0.015874 | -0.007885 | -0.042363 |
| H | 3.090587  | 1.606491  | 3.487978 | -0.016445 | -0.007838 | -0.042733 |
| H | 5.245016  | 5.294309  | 0.304583 | 0.016948  | -0.007871 | 0.042969  |
| H | -2.791874 | 8.507292  | 6.062207 | 0.015653  | -0.007861 | 0.042011  |

160 f = 4.389385 THz    27.579319 2PiTHz    146.414116 cm-1    18.153043 meV

|    | X         | Y         | Z        | dx        | dy        | dz        |
|----|-----------|-----------|----------|-----------|-----------|-----------|
| Li | 3.769818  | 9.645336  | 4.001386 | 0.008681  | -0.002139 | -0.001633 |
| Li | -1.316675 | 4.156264  | 2.365404 | -0.008628 | 0.002077  | 0.002095  |
| Li | -3.471104 | 2.744536  | 5.548798 | 0.009092  | 0.002143  | -0.001848 |
| Li | 5.924247  | 11.057064 | 0.817991 | -0.008636 | -0.002208 | 0.001501  |
| Na | 2.049025  | 6.784862  | 1.629696 | 0.009624  | 0.022741  | 0.041413  |
| Na | 0.404117  | 7.016739  | 4.737094 | -0.009371 | -0.022437 | -0.040424 |
| Na | 2.558546  | 13.685662 | 1.553699 | 0.009370  | -0.023585 | 0.041803  |
| Na | -0.105403 | 0.115939  | 4.813091 | -0.008598 | 0.023173  | -0.040680 |
| B  | 4.155007  | 8.978944  | 1.168663 | -0.005983 | -0.010607 | -0.011339 |
| B  | -1.701865 | 4.822656  | 5.198127 | 0.006098  | 0.010804  | 0.011247  |
| B  | 0.452564  | 2.078144  | 2.014732 | -0.005935 | 0.010432  | -0.011644 |
| B  | 2.000578  | 11.723457 | 4.352058 | 0.006146  | -0.010722 | 0.011049  |
| B  | -2.733891 | 11.746082 | 5.839177 | 0.011170  | -0.019030 | 0.010606  |
| B  | 5.187034  | 2.055518  | 0.527613 | -0.011192 | 0.019354  | -0.010846 |
| B  | 3.032605  | 4.845282  | 3.711007 | 0.010988  | 0.019010  | 0.010944  |
| B  | -0.579463 | 8.956318  | 2.655782 | -0.011200 | -0.019101 | -0.010690 |
| B  | -0.983708 | 0.054306  | 1.827988 | -0.034768 | 0.022557  | -0.007169 |



|    |           |           |          |           |           |           |
|----|-----------|-----------|----------|-----------|-----------|-----------|
| B  | 3.436850  | 13.747295 | 4.538802 | 0.034653  | -0.022508 | 0.006658  |
| B  | 5.591279  | 6.955106  | 1.355407 | -0.034477 | -0.022572 | -0.006367 |
| B  | -3.138137 | 6.846495  | 5.011383 | 0.034309  | 0.022502  | 0.006998  |
| Si | 0.631772  | 3.486686  | 4.508512 | 0.009699  | 0.014145  | -0.007608 |
| Si | 1.821370  | 10.314915 | 1.858278 | -0.009849 | -0.014329 | 0.007204  |
| Si | -0.333059 | 10.387486 | 5.041673 | 0.009836  | -0.013710 | -0.007507 |
| Si | 2.786201  | 3.414115  | 1.325117 | -0.009685 | 0.013985  | 0.007463  |
| O  | 0.061445  | 3.072947  | 3.041906 | 0.008432  | 0.017568  | -0.008933 |
| O  | 2.391697  | 10.728653 | 3.324884 | -0.008418 | -0.018130 | 0.008575  |
| O  | 4.546126  | 9.973747  | 0.141489 | 0.008091  | -0.017697 | -0.008789 |
| O  | -2.092984 | 3.827853  | 6.225301 | -0.007928 | 0.017983  | 0.008767  |
| O  | 2.197450  | 3.933608  | 4.519003 | 0.008616  | 0.018825  | 0.008184  |
| O  | 0.255692  | 9.867992  | 1.847787 | -0.008689 | -0.019293 | -0.008351 |
| O  | -1.898737 | 10.834409 | 5.031182 | 0.008736  | -0.018538 | 0.007586  |
| O  | 4.351879  | 2.967192  | 1.335608 | -0.008466 | 0.019147  | -0.007786 |
| O  | -0.212316 | 4.798696  | 5.055280 | 0.006508  | 0.003648  | 0.009681  |
| O  | 2.665458  | 9.002905  | 1.311510 | -0.006493 | -0.003606 | -0.010367 |
| O  | 0.511030  | 11.699496 | 4.494905 | 0.006667  | -0.003105 | 0.010146  |
| O  | 1.942113  | 2.102105  | 1.871885 | -0.006409 | 0.003095  | -0.010571 |
| O  | 0.525580  | 2.169271  | 5.472081 | -0.000154 | 0.013642  | -0.012501 |
| O  | 1.927562  | 11.632329 | 0.894709 | -0.000290 | -0.013567 | 0.012370  |
| O  | -0.226867 | 9.070071  | 4.078104 | 0.000350  | -0.012936 | -0.012604 |
| O  | 2.680009  | 4.731529  | 2.288686 | -0.000530 | 0.013069  | 0.012779  |
| O  | 0.058846  | 0.698526  | 2.444964 | -0.021970 | 0.009226  | -0.013008 |
| O  | 2.394296  | 13.103075 | 3.921826 | 0.022371  | -0.009708 | 0.012130  |
| O  | 4.548725  | 7.599326  | 0.738431 | -0.021682 | -0.009438 | -0.012446 |
| O  | -2.095583 | 6.202275  | 5.628359 | 0.021951  | 0.009629  | 0.012586  |
| O  | -2.459230 | 13.184059 | 5.445139 | 0.024668  | -0.025285 | 0.010077  |
| O  | 4.912372  | 0.617542  | 0.921651 | -0.024940 | 0.025683  | -0.010229 |
| O  | 2.757943  | 6.283259  | 4.105046 | 0.024557  | 0.025369  | 0.010178  |
| O  | -0.304801 | 7.518342  | 2.261744 | -0.024938 | -0.025575 | -0.009317 |
| O  | -0.175430 | 2.374756  | 0.744070 | -0.008844 | 0.013274  | -0.008521 |
| O  | 2.628573  | 11.426844 | 5.622720 | 0.008971  | -0.013391 | 0.007995  |
| O  | 4.783002  | 9.275557  | 2.439325 | -0.008934 | -0.013187 | -0.008246 |
| O  | -2.329859 | 4.526044  | 3.927465 | 0.008753  | 0.013309  | 0.008331  |
| O  | -1.223866 | 12.517207 | 2.155216 | -0.070350 | 0.027369  | 0.001112  |

|   |           |           |          |           |           |           |
|---|-----------|-----------|----------|-----------|-----------|-----------|
| O | 3.677009  | 1.284394  | 4.211574 | 0.069550  | -0.027276 | -0.001777 |
| O | 5.831438  | 5.616407  | 1.028179 | -0.069626 | -0.027382 | 0.002136  |
| O | -3.378295 | 8.185194  | 5.338611 | 0.069198  | 0.027227  | -0.001246 |
| H | -0.637445 | 12.195109 | 2.878812 | -0.081218 | 0.014653  | 0.002261  |
| H | 3.090587  | 1.606491  | 3.487978 | 0.080085  | -0.014690 | -0.002740 |
| H | 5.245016  | 5.294309  | 0.304583 | -0.079873 | -0.014698 | 0.002857  |
| H | -2.791874 | 8.507292  | 6.062207 | 0.079770  | 0.014506  | -0.002170 |

161 f = 4.336884 THz 27.249444 2PiTHz 144.662866 cm-1 17.935916 meV

|    | X         | Y         | Z        | dx        | dy        | dz        |
|----|-----------|-----------|----------|-----------|-----------|-----------|
| Li | 3.769818  | 9.645336  | 4.001386 | -0.002226 | 0.013804  | -0.006897 |
| Li | -1.316675 | 4.156264  | 2.365404 | 0.002054  | -0.013865 | 0.006036  |
| Li | -3.471104 | 2.744536  | 5.548798 | -0.002165 | -0.013644 | -0.005894 |
| Li | 5.924247  | 11.057064 | 0.817991 | 0.001843  | 0.013864  | 0.006733  |
| Na | 2.049025  | 6.784862  | 1.629696 | 0.016911  | -0.013551 | -0.070225 |
| Na | 0.404117  | 7.016739  | 4.737094 | -0.018416 | 0.012789  | 0.068836  |
| Na | 2.558546  | 13.685662 | 1.553699 | 0.017125  | 0.012945  | -0.070106 |
| Na | -0.105403 | 0.115939  | 4.813091 | -0.017529 | -0.012486 | 0.068518  |
| B  | 4.155007  | 8.978944  | 1.168663 | -0.001528 | -0.001039 | 0.011510  |
| B  | -1.701865 | 4.822656  | 5.198127 | 0.001726  | 0.001059  | -0.011408 |
| B  | 0.452564  | 2.078144  | 2.014732 | -0.001793 | 0.001209  | 0.011811  |
| B  | 2.000578  | 11.723457 | 4.352058 | 0.001419  | -0.000697 | -0.011071 |
| B  | -2.733891 | 11.746082 | 5.839177 | 0.001207  | -0.004780 | -0.004252 |
| B  | 5.187034  | 2.055518  | 0.527613 | -0.001226 | 0.004171  | 0.004416  |
| B  | 3.032605  | 4.845282  | 3.711007 | 0.001497  | 0.004386  | -0.004412 |
| B  | -0.579463 | 8.956318  | 2.655782 | -0.000876 | -0.004422 | 0.004129  |
| B  | -0.983708 | 0.054306  | 1.827988 | -0.018041 | 0.014189  | 0.034161  |
| B  | 3.436850  | 13.747295 | 4.538802 | 0.018039  | -0.014164 | -0.033258 |
| B  | 5.591279  | 6.955106  | 1.355407 | -0.017832 | -0.014133 | 0.033419  |
| B  | -3.138137 | 6.846495  | 5.011383 | 0.017922  | 0.014282  | -0.034340 |
| Si | 0.631772  | 3.486686  | 4.508512 | 0.012716  | 0.003001  | 0.007079  |
| Si | 1.821370  | 10.314915 | 1.858278 | -0.012188 | -0.002791 | -0.006604 |
| Si | -0.333059 | 10.387486 | 5.041673 | 0.012326  | -0.002863 | 0.006808  |
| Si | 2.786201  | 3.414115  | 1.325117 | -0.012521 | 0.002497  | -0.006748 |

|   |           |           |          |           |           |           |
|---|-----------|-----------|----------|-----------|-----------|-----------|
| O | 0.061445  | 3.072947  | 3.041906 | 0.020158  | 0.016317  | 0.001706  |
| O | 2.391697  | 10.728653 | 3.324884 | -0.019859 | -0.015128 | -0.001413 |
| O | 4.546126  | 9.973747  | 0.141489 | 0.019595  | -0.015595 | 0.001644  |
| O | -2.092984 | 3.827853  | 6.225301 | -0.019936 | 0.015946  | -0.001373 |
| O | 2.197450  | 3.933608  | 4.519003 | 0.008785  | 0.012822  | 0.014609  |
| O | 0.255692  | 9.867992  | 1.847787 | -0.008238 | -0.012658 | -0.014529 |
| O | -1.898737 | 10.834409 | 5.031182 | 0.008221  | -0.013200 | 0.014322  |
| O | 4.351879  | 2.967192  | 1.335608 | -0.008716 | 0.012013  | -0.014126 |
| O | -0.212316 | 4.798696  | 5.055280 | 0.001038  | -0.008726 | 0.011551  |
| O | 2.665458  | 9.002905  | 1.311510 | -0.000658 | 0.008560  | -0.010322 |
| O | 0.511030  | 11.699496 | 4.494905 | 0.000624  | 0.008907  | 0.011236  |
| O | 1.942113  | 2.102105  | 1.871885 | -0.001078 | -0.008966 | -0.010983 |
| O | 0.525580  | 2.169271  | 5.472081 | 0.015513  | -0.005245 | -0.001180 |
| O | 1.927562  | 11.632329 | 0.894709 | -0.014947 | 0.005074  | 0.001187  |
| O | -0.226867 | 9.070071  | 4.078104 | 0.015742  | 0.005402  | -0.001432 |
| O | 2.680009  | 4.731529  | 2.288686 | -0.015082 | -0.005600 | 0.001261  |
| O | 0.058846  | 0.698526  | 2.444964 | -0.020901 | 0.015333  | 0.034837  |
| O | 2.394296  | 13.103075 | 3.921826 | 0.019988  | -0.014352 | -0.033359 |
| O | 4.548725  | 7.599326  | 0.738431 | -0.020163 | -0.014737 | 0.033793  |
| O | -2.095583 | 6.202275  | 5.628359 | 0.020387  | 0.015123  | -0.034529 |
| O | -2.459230 | 13.184059 | 5.445139 | 0.010809  | -0.008478 | -0.018707 |
| O | 4.912372  | 0.617542  | 0.921651 | -0.010342 | 0.007714  | 0.018661  |
| O | 2.757943  | 6.283259  | 4.105046 | 0.010769  | 0.008047  | -0.019400 |
| O | -0.304801 | 7.518342  | 2.261744 | -0.010354 | -0.008136 | 0.018466  |
| O | -0.175430 | 2.374756  | 0.744070 | -0.002543 | -0.003447 | 0.010121  |
| O | 2.628573  | 11.426844 | 5.622720 | 0.002247  | 0.003602  | -0.009474 |
| O | 4.783002  | 9.275557  | 2.439325 | -0.002037 | 0.003532  | 0.009712  |
| O | -2.329859 | 4.526044  | 3.927465 | 0.002715  | -0.003617 | -0.009799 |
| O | -1.223866 | 12.517207 | 2.155216 | -0.025890 | 0.015387  | 0.036005  |
| O | 3.677009  | 1.284394  | 4.211574 | 0.026663  | -0.015334 | -0.034600 |
| O | 5.831438  | 5.616407  | 1.028179 | -0.026173 | -0.015336 | 0.034967  |
| O | -3.378295 | 8.185194  | 5.338611 | 0.025745  | 0.015427  | -0.036065 |
| H | -0.637445 | 12.195109 | 2.878812 | -0.025656 | 0.015031  | 0.035937  |
| H | 3.090587  | 1.606491  | 3.487978 | 0.026758  | -0.014727 | -0.034632 |
| H | 5.245016  | 5.294309  | 0.304583 | -0.026136 | -0.014642 | 0.034855  |
| H | -2.791874 | 8.507292  | 6.062207 | 0.025257  | 0.015134  | -0.035849 |

162 f = 4.320726 THz 27.147923 2PiTHz 144.123906 cm-1 17.869093  
meV

|    | X         | Y         | Z        | dx        | dy        | dz        |
|----|-----------|-----------|----------|-----------|-----------|-----------|
| Li | 3.769818  | 9.645336  | 4.001386 | 0.013958  | -0.007112 | 0.013876  |
| Li | -1.316675 | 4.156264  | 2.365404 | -0.011534 | 0.007884  | -0.013084 |
| Li | -3.471104 | 2.744536  | 5.548798 | -0.011603 | -0.007897 | -0.013645 |
| Li | 5.924247  | 11.057064 | 0.817991 | 0.013883  | 0.007239  | 0.013530  |
| Na | 2.049025  | 6.784862  | 1.629696 | -0.029684 | 0.049398  | 0.023136  |
| Na | 0.404117  | 7.016739  | 4.737094 | 0.038259  | -0.043599 | -0.010677 |
| Na | 2.558546  | 13.685662 | 1.553699 | 0.038311  | 0.043172  | -0.011254 |
| Na | -0.105403 | 0.115939  | 4.813091 | -0.030568 | -0.049332 | 0.023050  |
| B  | 4.155007  | 8.978944  | 1.168663 | 0.001287  | 0.010305  | -0.003621 |
| B  | -1.701865 | 4.822656  | 5.198127 | -0.000489 | -0.007869 | 0.000056  |
| B  | 0.452564  | 2.078144  | 2.014732 | -0.000160 | 0.007972  | -0.000051 |
| B  | 2.000578  | 11.723457 | 4.352058 | 0.001649  | -0.010575 | -0.003749 |
| B  | -2.733891 | 11.746082 | 5.839177 | -0.003948 | 0.008002  | 0.005186  |
| B  | 5.187034  | 2.055518  | 0.527613 | 0.001923  | -0.005487 | -0.004845 |
| B  | 3.032605  | 4.845282  | 3.711007 | 0.001777  | 0.006144  | -0.004750 |
| B  | -0.579463 | 8.956318  | 2.655782 | -0.004333 | -0.008232 | 0.005196  |
| B  | -0.983708 | 0.054306  | 1.827988 | 0.017542  | 0.003276  | 0.016977  |
| B  | 3.436850  | 13.747295 | 4.538802 | -0.018127 | -0.002762 | -0.016917 |
| B  | 5.591279  | 6.955106  | 1.355407 | -0.018973 | 0.002297  | -0.016346 |
| B  | -3.138137 | 6.846495  | 5.011383 | 0.017951  | -0.002652 | 0.016954  |
| Si | 0.631772  | 3.486686  | 4.508512 | -0.002962 | -0.025452 | -0.006661 |
| Si | 1.821370  | 10.314915 | 1.858278 | 0.001709  | 0.022956  | 0.004352  |
| Si | -0.333059 | 10.387486 | 5.041673 | 0.002187  | -0.023203 | 0.004360  |
| Si | 2.786201  | 3.414115  | 1.325117 | -0.003055 | 0.025811  | -0.006684 |
| O  | 0.061445  | 3.072947  | 3.041906 | -0.025064 | -0.000475 | -0.004657 |
| O  | 2.391697  | 10.728653 | 3.324884 | 0.025562  | -0.003975 | 0.002358  |
| O  | 4.546126  | 9.973747  | 0.141489 | 0.025884  | 0.003308  | 0.002332  |
| O  | -2.092984 | 3.827853  | 6.225301 | -0.025524 | 0.000645  | -0.004589 |
| O  | 2.197450  | 3.933608  | 4.519003 | -0.004144 | -0.018526 | -0.035829 |
| O  | 0.255692  | 9.867992  | 1.847787 | 0.003894  | 0.013304  | 0.034647  |
| O  | -1.898737 | 10.834409 | 5.031182 | 0.004445  | -0.013325 | 0.034691  |

|   |           |           |          |           |           |           |
|---|-----------|-----------|----------|-----------|-----------|-----------|
| O | 4.351879  | 2.967192  | 1.335608 | -0.003965 | 0.019730  | -0.036431 |
| O | -0.212316 | 4.798696  | 5.055280 | 0.001416  | -0.031471 | 0.014963  |
| O | 2.665458  | 9.002905  | 1.311510 | -0.001108 | 0.032021  | -0.021548 |
| O | 0.511030  | 11.699496 | 4.494905 | -0.000684 | -0.032006 | -0.021127 |
| O | 1.942113  | 2.102105  | 1.871885 | 0.001808  | 0.031432  | 0.014860  |
| O | 0.525580  | 2.169271  | 5.472081 | 0.016187  | -0.036623 | -0.014970 |
| O | 1.927562  | 11.632329 | 0.894709 | -0.020753 | 0.036238  | 0.015449  |
| O | -0.226867 | 9.070071  | 4.078104 | -0.020673 | -0.036469 | 0.015371  |
| O | 2.680009  | 4.731529  | 2.288686 | 0.015680  | 0.036766  | -0.014743 |
| O | 0.058846  | 0.698526  | 2.444964 | 0.022741  | 0.005141  | 0.002180  |
| O | 2.394296  | 13.103075 | 3.921826 | -0.018993 | -0.008582 | -0.006053 |
| O | 4.548725  | 7.599326  | 0.738431 | -0.019933 | 0.008037  | -0.005451 |
| O | -2.095583 | 6.202275  | 5.628359 | 0.022670  | -0.005069 | 0.002376  |
| O | -2.459230 | 13.184059 | 5.445139 | -0.002669 | 0.000347  | -0.026081 |
| O | 4.912372  | 0.617542  | 0.921651 | -0.001166 | 0.002945  | 0.030505  |
| O | 2.757943  | 6.283259  | 4.105046 | -0.000698 | -0.001954 | 0.030140  |
| O | -0.304801 | 7.518342  | 2.261744 | -0.003128 | -0.000556 | -0.026073 |
| O | -0.175430 | 2.374756  | 0.744070 | 0.001577  | -0.005172 | -0.004491 |
| O | 2.628573  | 11.426844 | 5.622720 | -0.002499 | 0.003800  | 0.001990  |
| O | 4.783002  | 9.275557  | 2.439325 | -0.002966 | -0.004058 | 0.002185  |
| O | -2.329859 | 4.526044  | 3.927465 | 0.001308  | 0.005384  | -0.004432 |
| O | -1.223866 | 12.517207 | 2.155216 | 0.031144  | 0.002166  | 0.019652  |
| O | 3.677009  | 1.284394  | 4.211574 | -0.034333 | -0.001738 | -0.020622 |
| O | 5.831438  | 5.616407  | 1.028179 | -0.035728 | 0.001151  | -0.019682 |
| O | -3.378295 | 8.185194  | 5.338611 | 0.032191  | -0.001550 | 0.019888  |
| H | -0.637445 | 12.195109 | 2.878812 | 0.050836  | -0.000634 | 0.004120  |
| H | 3.090587  | 1.606491  | 3.487978 | -0.053581 | 0.001013  | -0.005420 |
| H | 5.245016  | 5.294309  | 0.304583 | -0.055165 | -0.001629 | -0.004304 |
| H | -2.791874 | 8.507292  | 6.062207 | 0.052063  | 0.000816  | 0.004455  |

163 f = 4.300128 THz 27.018499 2PiTHz 143.436814 cm-1 17.783905 meV

|    | X         | Y        | Z        | dx        | dy        | dz        |
|----|-----------|----------|----------|-----------|-----------|-----------|
| Li | 3.769818  | 9.645336 | 4.001386 | -0.010287 | -0.004366 | -0.000218 |
| Li | -1.316675 | 4.156264 | 2.365404 | -0.012952 | -0.003456 | -0.002713 |

|    |           |           |          |           |           |           |
|----|-----------|-----------|----------|-----------|-----------|-----------|
| Li | -3.471104 | 2.744536  | 5.548798 | -0.012332 | 0.003677  | -0.002452 |
| Li | 5.924247  | 11.057064 | 0.817991 | -0.010901 | 0.004173  | -0.000642 |
| Na | 2.049025  | 6.784862  | 1.629696 | -0.041006 | -0.024196 | -0.057530 |
| Na | 0.404117  | 7.016739  | 4.737094 | -0.034476 | -0.034680 | -0.065329 |
| Na | 2.558546  | 13.685662 | 1.553699 | -0.035105 | 0.034237  | -0.063331 |
| Na | -0.105403 | 0.115939  | 4.813091 | -0.040499 | 0.024630  | -0.059617 |
| B  | 4.155007  | 8.978944  | 1.168663 | -0.006167 | -0.011775 | 0.018087  |
| B  | -1.701865 | 4.822656  | 5.198127 | -0.005341 | -0.012918 | 0.018776  |
| B  | 0.452564  | 2.078144  | 2.014732 | -0.005830 | 0.013118  | 0.018157  |
| B  | 2.000578  | 11.723457 | 4.352058 | -0.005552 | 0.011577  | 0.018660  |
| B  | -2.733891 | 11.746082 | 5.839177 | 0.011498  | -0.010611 | -0.001443 |
| B  | 5.187034  | 2.055518  | 0.527613 | 0.011741  | -0.012143 | -0.002827 |
| B  | 3.032605  | 4.845282  | 3.711007 | 0.012169  | 0.012024  | -0.002230 |
| B  | -0.579463 | 8.956318  | 2.655782 | 0.010972  | 0.010785  | -0.002032 |
| B  | -0.983708 | 0.054306  | 1.827988 | 0.005219  | -0.002087 | -0.000691 |
| B  | 3.436850  | 13.747295 | 4.538802 | 0.001561  | -0.002005 | -0.002356 |
| B  | 5.591279  | 6.955106  | 1.355407 | 0.000942  | 0.002105  | -0.003371 |
| B  | -3.138137 | 6.846495  | 5.011383 | 0.005685  | 0.002004  | 0.000415  |
| Si | 0.631772  | 3.486686  | 4.508512 | 0.005281  | 0.010816  | 0.010776  |
| Si | 1.821370  | 10.314915 | 1.858278 | 0.005471  | 0.016004  | 0.012331  |
| Si | -0.333059 | 10.387486 | 5.041673 | 0.005506  | -0.015992 | 0.011842  |
| Si | 2.786201  | 3.414115  | 1.325117 | 0.005327  | -0.010806 | 0.011262  |
| O  | 0.061445  | 3.072947  | 3.041906 | -0.004011 | 0.021010  | 0.010784  |
| O  | 2.391697  | 10.728653 | 3.324884 | 0.001071  | 0.021478  | 0.011724  |
| O  | 4.546126  | 9.973747  | 0.141489 | 0.000599  | -0.021751 | 0.011285  |
| O  | -2.092984 | 3.827853  | 6.225301 | -0.003564 | -0.020776 | 0.011251  |
| O  | 2.197450  | 3.933608  | 4.519003 | -0.000644 | 0.027607  | 0.004210  |
| O  | 0.255692  | 9.867992  | 1.847787 | -0.000298 | 0.031599  | 0.011296  |
| O  | -1.898737 | 10.834409 | 5.031182 | 0.000036  | -0.030717 | 0.010866  |
| O  | 4.351879  | 2.967192  | 1.335608 | -0.000851 | -0.028336 | 0.004580  |
| O  | -0.212316 | 4.798696  | 5.055280 | -0.002983 | -0.005045 | 0.033350  |
| O  | 2.665458  | 9.002905  | 1.311510 | -0.004141 | 0.001140  | 0.030365  |
| O  | 0.511030  | 11.699496 | 4.494905 | -0.003480 | -0.001323 | 0.030481  |
| O  | 1.942113  | 2.102105  | 1.871885 | -0.003507 | 0.005241  | 0.033268  |
| O  | 0.525580  | 2.169271  | 5.472081 | 0.025059  | -0.001087 | -0.004281 |
| O  | 1.927562  | 11.632329 | 0.894709 | 0.022442  | 0.005922  | -0.001230 |

|   |           |           |          |           |           |           |
|---|-----------|-----------|----------|-----------|-----------|-----------|
| O | -0.226867 | 9.070071  | 4.078104 | 0.021600  | -0.006163 | -0.001633 |
| O | 2.680009  | 4.731529  | 2.288686 | 0.025866  | 0.001323  | -0.003870 |
| O | 0.058846  | 0.698526  | 2.444964 | -0.014777 | 0.016293  | 0.017307  |
| O | 2.394296  | 13.103075 | 3.921826 | -0.019241 | 0.015779  | 0.018265  |
| O | 4.548725  | 7.599326  | 0.738431 | -0.019995 | -0.015788 | 0.017472  |
| O | -2.095583 | 6.202275  | 5.628359 | -0.014222 | -0.016318 | 0.018205  |
| O | -2.459230 | 13.184059 | 5.445139 | 0.019234  | -0.014456 | -0.024059 |
| O | 4.912372  | 0.617542  | 0.921651 | 0.019412  | -0.014692 | -0.019869 |
| O | 2.757943  | 6.283259  | 4.105046 | 0.019603  | 0.014452  | -0.018576 |
| O | -0.304801 | 7.518342  | 2.261744 | 0.018994  | 0.014790  | -0.025419 |
| O | -0.175430 | 2.374756  | 0.744070 | 0.006646  | 0.006236  | 0.011211  |
| O | 2.628573  | 11.426844 | 5.622720 | 0.006587  | 0.007013  | 0.012477  |
| O | 4.783002  | 9.275557  | 2.439325 | 0.006055  | -0.007165 | 0.011892  |
| O | -2.329859 | 4.526044  | 3.927465 | 0.007048  | -0.006096 | 0.011860  |
| O | -1.223866 | 12.517207 | 2.155216 | 0.017995  | -0.001817 | 0.003415  |
| O | 3.677009  | 1.284394  | 4.211574 | 0.011630  | -0.001519 | 0.001369  |
| O | 5.831438  | 5.616407  | 1.028179 | 0.010553  | 0.001499  | 0.000636  |
| O | -3.378295 | 8.185194  | 5.338611 | 0.018820  | 0.001810  | 0.004366  |
| H | -0.637445 | 12.195109 | 2.878812 | 0.016974  | -0.003511 | 0.003152  |
| H | 3.090587  | 1.606491  | 3.487978 | 0.007210  | -0.002657 | 0.003880  |
| H | 5.245016  | 5.294309  | 0.304583 | 0.005939  | 0.002812  | 0.003156  |
| H | -2.791874 | 8.507292  | 6.062207 | 0.017968  | 0.003296  | 0.004135  |

164 f = 4.205728 THz 26.425369 2PiTHz 140.287983 cm-1 17.393499

meV

|    | X         | Y         | Z        | dx        | dy        | dz        |
|----|-----------|-----------|----------|-----------|-----------|-----------|
| Li | 3.769818  | 9.645336  | 4.001386 | -0.024261 | -0.006258 | -0.013289 |
| Li | -1.316675 | 4.156264  | 2.365404 | 0.024206  | 0.006125  | 0.014259  |
| Li | -3.471104 | 2.744536  | 5.548798 | -0.024428 | 0.006225  | -0.014269 |
| Li | 5.924247  | 11.057064 | 0.817991 | 0.024004  | -0.006279 | 0.013158  |
| Na | 2.049025  | 6.784862  | 1.629696 | 0.015734  | 0.026889  | 0.012151  |
| Na | 0.404117  | 7.016739  | 4.737094 | -0.016083 | -0.027218 | -0.012169 |
| Na | 2.558546  | 13.685662 | 1.553699 | 0.015409  | -0.026685 | 0.011320  |
| Na | -0.105403 | 0.115939  | 4.813091 | -0.016273 | 0.027584  | -0.013049 |
| B  | 4.155007  | 8.978944  | 1.168663 | 0.027736  | 0.001281  | 0.009248  |

|    |           |           |          |           |           |           |
|----|-----------|-----------|----------|-----------|-----------|-----------|
| B  | -1.701865 | 4.822656  | 5.198127 | -0.028453 | -0.002013 | -0.008676 |
| B  | 0.452564  | 2.078144  | 2.014732 | 0.028320  | -0.001797 | 0.009019  |
| B  | 2.000578  | 11.723457 | 4.352058 | -0.027893 | 0.001565  | -0.008959 |
| B  | -2.733891 | 11.746082 | 5.839177 | -0.017186 | -0.023214 | -0.019332 |
| B  | 5.187034  | 2.055518  | 0.527613 | 0.017910  | 0.023478  | 0.019178  |
| B  | 3.032605  | 4.845282  | 3.711007 | -0.017682 | 0.023668  | -0.019227 |
| B  | -0.579463 | 8.956318  | 2.655782 | 0.017380  | -0.023033 | 0.019228  |
| B  | -0.983708 | 0.054306  | 1.827988 | 0.018014  | 0.010516  | 0.011962  |
| B  | 3.436850  | 13.747295 | 4.538802 | -0.017898 | -0.010623 | -0.012797 |
| B  | 5.591279  | 6.955106  | 1.355407 | 0.017922  | -0.010657 | 0.012818  |
| B  | -3.138137 | 6.846495  | 5.011383 | -0.017988 | 0.010566  | -0.012048 |
| Si | 0.631772  | 3.486686  | 4.508512 | -0.003935 | 0.012166  | 0.012249  |
| Si | 1.821370  | 10.314915 | 1.858278 | 0.003599  | -0.011795 | -0.012203 |
| Si | -0.333059 | 10.387486 | 5.041673 | -0.003532 | -0.012052 | 0.012329  |
| Si | 2.786201  | 3.414115  | 1.325117 | 0.004030  | 0.011825  | -0.012043 |
| O  | 0.061445  | 3.072947  | 3.041906 | 0.010545  | -0.016662 | 0.016533  |
| O  | 2.391697  | 10.728653 | 3.324884 | -0.010797 | 0.015996  | -0.016260 |
| O  | 4.546126  | 9.973747  | 0.141489 | 0.010748  | 0.015459  | 0.016340  |
| O  | -2.092984 | 3.827853  | 6.225301 | -0.010523 | -0.017106 | -0.016341 |
| O  | 2.197450  | 3.933608  | 4.519003 | -0.016292 | 0.050539  | 0.012256  |
| O  | 0.255692  | 9.867992  | 1.847787 | 0.015536  | -0.048984 | -0.011871 |
| O  | -1.898737 | 10.834409 | 5.031182 | -0.015552 | -0.049471 | 0.011912  |
| O  | 4.351879  | 2.967192  | 1.335608 | 0.016280  | 0.049908  | -0.012036 |
| O  | -0.212316 | 4.798696  | 5.055280 | -0.028881 | 0.003031  | -0.008503 |
| O  | 2.665458  | 9.002905  | 1.311510 | 0.028054  | -0.003032 | 0.008448  |
| O  | 0.511030  | 11.699496 | 4.494905 | -0.028156 | -0.002978 | -0.007891 |
| O  | 1.942113  | 2.102105  | 1.871885 | 0.028788  | 0.002987  | 0.009072  |
| O  | 0.525580  | 2.169271  | 5.472081 | 0.030720  | 0.009398  | 0.013746  |
| O  | 1.927562  | 11.632329 | 0.894709 | -0.029915 | -0.009161 | -0.013843 |
| O  | -0.226867 | 9.070071  | 4.078104 | 0.030342  | -0.009212 | 0.013708  |
| O  | 2.680009  | 4.731529  | 2.288686 | -0.030293 | 0.009228  | -0.013782 |
| O  | 0.058846  | 0.698526  | 2.444964 | 0.040133  | -0.008267 | -0.006439 |
| O  | 2.394296  | 13.103075 | 3.921826 | -0.039614 | 0.007626  | 0.005613  |
| O  | 4.548725  | 7.599326  | 0.738431 | 0.039207  | 0.007204  | -0.005211 |
| O  | -2.095583 | 6.202275  | 5.628359 | -0.040559 | -0.008584 | 0.006805  |
| O  | -2.459230 | 13.184059 | 5.445139 | -0.001373 | -0.032019 | -0.041891 |



|   |           |           |          |           |           |           |
|---|-----------|-----------|----------|-----------|-----------|-----------|
| O | 4.912372  | 0.617542  | 0.921651 | 0.001601  | 0.032493  | 0.041447  |
| O | 2.757943  | 6.283259  | 4.105046 | -0.001212 | 0.032771  | -0.041978 |
| O | -0.304801 | 7.518342  | 2.261744 | 0.001680  | -0.031787 | 0.041501  |
| O | -0.175430 | 2.374756  | 0.744070 | 0.020903  | 0.011073  | 0.016311  |
| O | 2.628573  | 11.426844 | 5.622720 | -0.020040 | -0.011069 | -0.016387 |
| O | 4.783002  | 9.275557  | 2.439325 | 0.020146  | -0.011176 | 0.016520  |
| O | -2.329859 | 4.526044  | 3.927465 | -0.020779 | 0.010932  | -0.016093 |
| O | -1.223866 | 12.517207 | 2.155216 | 0.015441  | 0.008529  | 0.006692  |
| O | 3.677009  | 1.284394  | 4.211574 | -0.015996 | -0.008601 | -0.007958 |
| O | 5.831438  | 5.616407  | 1.028179 | 0.016301  | -0.008635 | 0.008044  |
| O | -3.378295 | 8.185194  | 5.338611 | -0.015229 | 0.008576  | -0.006762 |
| H | -0.637445 | 12.195109 | 2.878812 | 0.013387  | 0.007711  | 0.010052  |
| H | 3.090587  | 1.606491  | 3.487978 | -0.014327 | -0.008403 | -0.011378 |
| H | 5.245016  | 5.294309  | 0.304583 | 0.014603  | -0.008432 | 0.011481  |
| H | -2.791874 | 8.507292  | 6.062207 | -0.013311 | 0.007761  | -0.010024 |

165 f = 4.174178 THz 26.227133 2PiTHz 139.235583 cm-1 17.263018 meV

|    | X         | Y         | Z        | dx        | dy        | dz        |
|----|-----------|-----------|----------|-----------|-----------|-----------|
| Li | 3.769818  | 9.645336  | 4.001386 | 0.023173  | -0.003836 | 0.018763  |
| Li | -1.316675 | 4.156264  | 2.365404 | 0.022802  | -0.004550 | 0.018771  |
| Li | -3.471104 | 2.744536  | 5.548798 | -0.022764 | -0.004413 | -0.018637 |
| Li | 5.924247  | 11.057064 | 0.817991 | -0.023255 | -0.003949 | -0.018901 |
| Na | 2.049025  | 6.784862  | 1.629696 | 0.020268  | 0.013336  | 0.016772  |
| Na | 0.404117  | 7.016739  | 4.737094 | 0.021191  | 0.014857  | 0.018587  |
| Na | 2.558546  | 13.685662 | 1.553699 | -0.021649 | 0.014310  | -0.018267 |
| Na | -0.105403 | 0.115939  | 4.813091 | -0.019745 | 0.013850  | -0.016983 |
| B  | 4.155007  | 8.978944  | 1.168663 | -0.023626 | -0.017433 | -0.007942 |
| B  | -1.701865 | 4.822656  | 5.198127 | -0.022981 | -0.017672 | -0.007980 |
| B  | 0.452564  | 2.078144  | 2.014732 | 0.022960  | -0.017751 | 0.007961  |
| B  | 2.000578  | 11.723457 | 4.352058 | 0.023629  | -0.017346 | 0.007951  |
| B  | -2.733891 | 11.746082 | 5.839177 | 0.017197  | 0.014300  | 0.015629  |
| B  | 5.187034  | 2.055518  | 0.527613 | 0.016751  | 0.013718  | 0.015435  |
| B  | 3.032605  | 4.845282  | 3.711007 | -0.016790 | 0.013679  | -0.015406 |
| B  | -0.579463 | 8.956318  | 2.655782 | -0.017174 | 0.014342  | -0.015669 |

|    |           |           |          |           |           |           |
|----|-----------|-----------|----------|-----------|-----------|-----------|
| B  | -0.983708 | 0.054306  | 1.827988 | 0.007673  | -0.003966 | -0.003193 |
| B  | 3.436850  | 13.747295 | 4.538802 | 0.008802  | -0.003633 | -0.003290 |
| B  | 5.591279  | 6.955106  | 1.355407 | -0.008648 | -0.003698 | 0.003510  |
| B  | -3.138137 | 6.846495  | 5.011383 | -0.007800 | -0.003904 | 0.002975  |
| Si | 0.631772  | 3.486686  | 4.508512 | -0.006618 | 0.001597  | 0.008054  |
| Si | 1.821370  | 10.314915 | 1.858278 | -0.006876 | 0.001794  | 0.008174  |
| Si | -0.333059 | 10.387486 | 5.041673 | 0.006852  | 0.002054  | -0.008227 |
| Si | 2.786201  | 3.414115  | 1.325117 | 0.006608  | 0.001338  | -0.008015 |
| O  | 0.061445  | 3.072947  | 3.041906 | -0.004871 | -0.044445 | 0.021171  |
| O  | 2.391697  | 10.728653 | 3.324884 | -0.004930 | -0.044427 | 0.021293  |
| O  | 4.546126  | 9.973747  | 0.141489 | 0.004704  | -0.044447 | -0.021340 |
| O  | -2.092984 | 3.827853  | 6.225301 | 0.005054  | -0.044421 | -0.021130 |
| O  | 2.197450  | 3.933608  | 4.519003 | -0.018201 | 0.037190  | 0.007296  |
| O  | 0.255692  | 9.867992  | 1.847787 | -0.018649 | 0.038028  | 0.007176  |
| O  | -1.898737 | 10.834409 | 5.031182 | 0.018623  | 0.038239  | -0.007513 |
| O  | 4.351879  | 2.967192  | 1.335608 | 0.018183  | 0.036947  | -0.006970 |
| O  | -0.212316 | 4.798696  | 5.055280 | -0.024276 | 0.001088  | -0.020508 |
| O  | 2.665458  | 9.002905  | 1.311510 | -0.024893 | 0.001101  | -0.020557 |
| O  | 0.511030  | 11.699496 | 4.494905 | 0.024918  | 0.001403  | 0.020699  |
| O  | 1.942113  | 2.102105  | 1.871885 | 0.024223  | 0.000792  | 0.020357  |
| O  | 0.525580  | 2.169271  | 5.472081 | 0.028246  | 0.001547  | 0.012390  |
| O  | 1.927562  | 11.632329 | 0.894709 | 0.028752  | 0.001548  | 0.012426  |
| O  | -0.226867 | 9.070071  | 4.078104 | -0.028620 | 0.001915  | -0.012558 |
| O  | 2.680009  | 4.731529  | 2.288686 | -0.028392 | 0.001185  | -0.012269 |
| O  | 0.058846  | 0.698526  | 2.444964 | 0.040968  | -0.035775 | -0.022905 |
| O  | 2.394296  | 13.103075 | 3.921826 | 0.042221  | -0.035540 | -0.023196 |
| O  | 4.548725  | 7.599326  | 0.738431 | -0.042021 | -0.035622 | 0.023260  |
| O  | -2.095583 | 6.202275  | 5.628359 | -0.041155 | -0.035703 | 0.022838  |
| O  | -2.459230 | 13.184059 | 5.445139 | -0.004010 | 0.026137  | 0.030320  |
| O  | 4.912372  | 0.617542  | 0.921651 | -0.004396 | 0.025390  | 0.029446  |
| O  | 2.757943  | 6.283259  | 4.105046 | 0.004426  | 0.025452  | -0.029775 |
| O  | -0.304801 | 7.518342  | 2.261744 | 0.004008  | 0.026089  | -0.030008 |
| O  | -0.175430 | 2.374756  | 0.744070 | 0.021157  | -0.001218 | 0.013989  |
| O  | 2.628573  | 11.426844 | 5.622720 | 0.021649  | -0.000719 | 0.014093  |
| O  | 4.783002  | 9.275557  | 2.439325 | -0.021626 | -0.000676 | -0.014136 |
| O  | -2.329859 | 4.526044  | 3.927465 | -0.021204 | -0.001282 | -0.013954 |

|   |           |           |          |           |           |           |
|---|-----------|-----------|----------|-----------|-----------|-----------|
| O | -1.223866 | 12.517207 | 2.155216 | -0.015648 | -0.002384 | -0.013640 |
| O | 3.677009  | 1.284394  | 4.211574 | -0.013916 | -0.002243 | -0.014009 |
| O | 5.831438  | 5.616407  | 1.028179 | 0.014155  | -0.002313 | 0.014286  |
| O | -3.378295 | 8.185194  | 5.338611 | 0.015446  | -0.002322 | 0.013385  |
| H | -0.637445 | 12.195109 | 2.878812 | -0.010900 | -0.019398 | -0.026996 |
| H | 3.090587  | 1.606491  | 3.487978 | -0.008902 | -0.019296 | -0.027528 |
| H | 5.245016  | 5.294309  | 0.304583 | 0.009345  | -0.019312 | 0.027632  |
| H | -2.791874 | 8.507292  | 6.062207 | 0.010505  | -0.019406 | 0.026913  |

166 f = 3.956591 THz 24.859995 2PiTHz 131.977670 cm-1 16.363152 meV

|    | X         | Y         | Z        | dx        | dy        | dz        |
|----|-----------|-----------|----------|-----------|-----------|-----------|
| Li | 3.769818  | 9.645336  | 4.001386 | 0.003696  | 0.036552  | -0.016360 |
| Li | -1.316675 | 4.156264  | 2.365404 | -0.002354 | -0.035213 | 0.015859  |
| Li | -3.471104 | 2.744536  | 5.548798 | -0.003414 | 0.036667  | 0.016526  |
| Li | 5.924247  | 11.057064 | 0.817991 | 0.002465  | -0.035488 | -0.015846 |
| Na | 2.049025  | 6.784862  | 1.629696 | 0.017848  | 0.001445  | -0.037205 |
| Na | 0.404117  | 7.016739  | 4.737094 | -0.018628 | -0.003695 | 0.038740  |
| Na | 2.558546  | 13.685662 | 1.553699 | -0.017278 | 0.001262  | 0.037628  |
| Na | -0.105403 | 0.115939  | 4.813091 | 0.018440  | -0.003927 | -0.038235 |
| B  | 4.155007  | 8.978944  | 1.168663 | -0.008196 | -0.011349 | 0.004447  |
| B  | -1.701865 | 4.822656  | 5.198127 | 0.010092  | 0.009971  | -0.003991 |
| B  | 0.452564  | 2.078144  | 2.014732 | 0.008240  | -0.011301 | -0.004764 |
| B  | 2.000578  | 11.723457 | 4.352058 | -0.009911 | 0.009546  | 0.003811  |
| B  | -2.733891 | 11.746082 | 5.839177 | -0.007049 | 0.012019  | -0.000240 |
| B  | 5.187034  | 2.055518  | 0.527613 | 0.005188  | -0.011030 | -0.000994 |
| B  | 3.032605  | 4.845282  | 3.711007 | 0.006881  | 0.011991  | 0.000529  |
| B  | -0.579463 | 8.956318  | 2.655782 | -0.005449 | -0.011291 | 0.001056  |
| B  | -0.983708 | 0.054306  | 1.827988 | 0.025768  | -0.025036 | -0.030204 |
| B  | 3.436850  | 13.747295 | 4.538802 | -0.033640 | 0.026601  | 0.031346  |
| B  | 5.591279  | 6.955106  | 1.355407 | -0.025586 | -0.025111 | 0.030030  |
| B  | -3.138137 | 6.846495  | 5.011383 | 0.033615  | 0.026785  | -0.031186 |
| Si | 0.631772  | 3.486686  | 4.508512 | 0.006257  | -0.009006 | 0.000907  |
| Si | 1.821370  | 10.314915 | 1.858278 | -0.005438 | 0.008101  | -0.002020 |
| Si | -0.333059 | 10.387486 | 5.041673 | -0.006357 | -0.008777 | -0.001029 |

|    |           |           |          |           |           |           |
|----|-----------|-----------|----------|-----------|-----------|-----------|
| Si | 2.786201  | 3.414115  | 1.325117 | 0.005339  | 0.008626  | 0.002008  |
| O  | 0.061445  | 3.072947  | 3.041906 | -0.005075 | -0.035138 | 0.013215  |
| O  | 2.391697  | 10.728653 | 3.324884 | 0.005821  | 0.034432  | -0.014415 |
| O  | 4.546126  | 9.973747  | 0.141489 | 0.004967  | -0.034945 | -0.013343 |
| O  | -2.092984 | 3.827853  | 6.225301 | -0.005971 | 0.035310  | 0.014529  |
| O  | 2.197450  | 3.933608  | 4.519003 | -0.002364 | 0.016908  | -0.001465 |
| O  | 0.255692  | 9.867992  | 1.847787 | 0.002140  | -0.014078 | 0.003847  |
| O  | -1.898737 | 10.834409 | 5.031182 | 0.002370  | 0.017424  | 0.001403  |
| O  | 4.351879  | 2.967192  | 1.335608 | -0.002206 | -0.013492 | -0.003936 |
| O  | -0.212316 | 4.798696  | 5.055280 | 0.005312  | -0.011822 | -0.000159 |
| O  | 2.665458  | 9.002905  | 1.311510 | -0.004477 | 0.009603  | -0.000254 |
| O  | 0.511030  | 11.699496 | 4.494905 | -0.005192 | -0.011806 | -0.000157 |
| O  | 1.942113  | 2.102105  | 1.871885 | 0.004463  | 0.009890  | -0.000207 |
| O  | 0.525580  | 2.169271  | 5.472081 | 0.012783  | -0.009288 | -0.000468 |
| O  | 1.927562  | 11.632329 | 0.894709 | -0.012773 | 0.008088  | -0.001343 |
| O  | -0.226867 | 9.070071  | 4.078104 | -0.013315 | -0.009208 | 0.000539  |
| O  | 2.680009  | 4.731529  | 2.288686 | 0.012530  | 0.008400  | 0.001616  |
| O  | 0.058846  | 0.698526  | 2.444964 | 0.031332  | -0.028492 | -0.033477 |
| O  | 2.394296  | 13.103075 | 3.921826 | -0.036367 | 0.027199  | 0.032973  |
| O  | 4.548725  | 7.599326  | 0.738431 | -0.030918 | -0.028404 | 0.033039  |
| O  | -2.095583 | 6.202275  | 5.628359 | 0.037038  | 0.027864  | -0.033491 |
| O  | -2.459230 | 13.184059 | 5.445139 | -0.019105 | 0.015614  | 0.008663  |
| O  | 4.912372  | 0.617542  | 0.921651 | 0.013078  | -0.012875 | -0.008330 |
| O  | 2.757943  | 6.283259  | 4.105046 | 0.018705  | 0.015428  | -0.007925 |
| O  | -0.304801 | 7.518342  | 2.261744 | -0.013347 | -0.013176 | 0.008699  |
| O  | -0.175430 | 2.374756  | 0.744070 | 0.001467  | 0.003006  | 0.004379  |
| O  | 2.628573  | 11.426844 | 5.622720 | -0.002691 | -0.004582 | -0.005116 |
| O  | 4.783002  | 9.275557  | 2.439325 | -0.001671 | 0.002874  | -0.004571 |
| O  | -2.329859 | 4.526044  | 3.927465 | 0.002618  | -0.004358 | 0.005107  |
| O  | -1.223866 | 12.517207 | 2.155216 | 0.033901  | -0.028232 | -0.039847 |
| O  | 3.677009  | 1.284394  | 4.211574 | -0.048946 | 0.030997  | 0.041858  |
| O  | 5.831438  | 5.616407  | 1.028179 | -0.033538 | -0.028210 | 0.039486  |
| O  | -3.378295 | 8.185194  | 5.338611 | 0.048651  | 0.031112  | -0.041584 |
| H  | -0.637445 | 12.195109 | 2.878812 | 0.029218  | -0.027233 | -0.035994 |
| H  | 3.090587  | 1.606491  | 3.487978 | -0.046333 | 0.026860  | 0.038021  |
| H  | 5.245016  | 5.294309  | 0.304583 | -0.028666 | -0.027287 | 0.035521  |

H -2.791874 8.507292 6.062207 0.046215 0.026934 -0.037852

167 f = 3.943184 THz 24.775757 2PiTHz 131.530464 cm-1 16.307705

meV

|    | X         | Y         | Z        | dx        | dy        | dz        |
|----|-----------|-----------|----------|-----------|-----------|-----------|
| Li | 3.769818  | 9.645336  | 4.001386 | 0.006667  | 0.004956  | -0.001887 |
| Li | -1.316675 | 4.156264  | 2.365404 | 0.007171  | 0.010390  | -0.004543 |
| Li | -3.471104 | 2.744536  | 5.548798 | -0.006789 | 0.004436  | 0.001820  |
| Li | 5.924247  | 11.057064 | 0.817991 | -0.007163 | 0.010915  | 0.004578  |
| Na | 2.049025  | 6.784862  | 1.629696 | -0.007618 | -0.014841 | 0.009218  |
| Na | 0.404117  | 7.016739  | 4.737094 | -0.003760 | -0.014464 | 0.002903  |
| Na | 2.558546  | 13.685662 | 1.553699 | 0.007046  | -0.014728 | -0.009386 |
| Na | -0.105403 | 0.115939  | 4.813091 | 0.004362  | -0.014470 | -0.002977 |
| B  | 4.155007  | 8.978944  | 1.168663 | 0.011069  | -0.008417 | 0.003889  |
| B  | -1.701865 | 4.822656  | 5.198127 | 0.009561  | -0.010777 | 0.004579  |
| B  | 0.452564  | 2.078144  | 2.014732 | -0.011134 | -0.008959 | -0.003775 |
| B  | 2.000578  | 11.723457 | 4.352058 | -0.009577 | -0.010131 | -0.004627 |
| B  | -2.733891 | 11.746082 | 5.839177 | -0.008970 | 0.004431  | -0.008405 |
| B  | 5.187034  | 2.055518  | 0.527613 | -0.009986 | 0.005879  | -0.008250 |
| B  | 3.032605  | 4.845282  | 3.711007 | 0.009002  | 0.004032  | 0.008261  |
| B  | -0.579463 | 8.956318  | 2.655782 | 0.009946  | 0.006322  | 0.008369  |
| B  | -0.983708 | 0.054306  | 1.827988 | -0.050042 | 0.011584  | 0.009646  |
| B  | 3.436850  | 13.747295 | 4.538802 | -0.044742 | 0.007683  | 0.004251  |
| B  | 5.591279  | 6.955106  | 1.355407 | 0.049671  | 0.011955  | -0.009383 |
| B  | -3.138137 | 6.846495  | 5.011383 | 0.045165  | 0.007295  | -0.004520 |
| Si | 0.631772  | 3.486686  | 4.508512 | 0.004721  | -0.002686 | -0.006370 |
| Si | 1.821370  | 10.314915 | 1.858278 | 0.005626  | -0.003682 | -0.006181 |
| Si | -0.333059 | 10.387486 | 5.041673 | -0.004680 | -0.002282 | 0.006423  |
| Si | 2.786201  | 3.414115  | 1.325117 | -0.005713 | -0.004179 | 0.006154  |
| O  | 0.061445  | 3.072947  | 3.041906 | 0.005364  | 0.001069  | -0.008100 |
| O  | 2.391697  | 10.728653 | 3.324884 | 0.004567  | -0.004086 | -0.005982 |
| O  | 4.546126  | 9.973747  | 0.141489 | -0.005450 | 0.001679  | 0.008262  |
| O  | -2.092984 | 3.827853  | 6.225301 | -0.004503 | -0.004890 | 0.005813  |
| O  | 2.197450  | 3.933608  | 4.519003 | -0.001414 | 0.019098  | 0.014768  |
| O  | 0.255692  | 9.867992  | 1.847787 | -0.001814 | 0.021949  | 0.014430  |

|   |           |           |          |           |           |           |
|---|-----------|-----------|----------|-----------|-----------|-----------|
| O | -1.898737 | 10.834409 | 5.031182 | 0.001418  | 0.019391  | -0.014819 |
| O | 4.351879  | 2.967192  | 1.335608 | 0.001735  | 0.021478  | -0.014319 |
| O | -0.212316 | 4.798696  | 5.055280 | 0.003890  | -0.011639 | -0.000502 |
| O | 2.665458  | 9.002905  | 1.311510 | 0.004675  | -0.012993 | -0.000552 |
| O | 0.511030  | 11.699496 | 4.494905 | -0.003898 | -0.011237 | 0.000496  |
| O | 1.942113  | 2.102105  | 1.871885 | -0.004750 | -0.013413 | 0.000655  |
| O | 0.525580  | 2.169271  | 5.472081 | 0.001565  | -0.005403 | -0.011688 |
| O | 1.927562  | 11.632329 | 0.894709 | 0.003452  | -0.006443 | -0.011690 |
| O | -0.226867 | 9.070071  | 4.078104 | -0.001404 | -0.005065 | 0.011802  |
| O | 2.680009  | 4.731529  | 2.288686 | -0.003590 | -0.006831 | 0.011550  |
| O | 0.058846  | 0.698526  | 2.444964 | -0.035694 | -0.003827 | 0.002406  |
| O | 2.394296  | 13.103075 | 3.921826 | -0.029973 | -0.007877 | -0.003143 |
| O | 4.548725  | 7.599326  | 0.738431 | 0.035587  | -0.003283 | -0.002402 |
| O | -2.095583 | 6.202275  | 5.628359 | 0.029925  | -0.008608 | 0.003288  |
| O | -2.459230 | 13.184059 | 5.445139 | -0.032393 | 0.014106  | -0.001894 |
| O | 4.912372  | 0.617542  | 0.921651 | -0.035211 | 0.016077  | -0.000422 |
| O | 2.757943  | 6.283259  | 4.105046 | 0.032669  | 0.013829  | 0.001688  |
| O | -0.304801 | 7.518342  | 2.261744 | 0.035031  | 0.016454  | 0.000498  |
| O | -0.175430 | 2.374756  | 0.744070 | -0.006185 | -0.009765 | -0.004213 |
| O | 2.628573  | 11.426844 | 5.622720 | -0.005846 | -0.008641 | -0.003555 |
| O | 4.783002  | 9.275557  | 2.439325 | 0.006156  | -0.009298 | 0.004334  |
| O | -2.329859 | 4.526044  | 3.927465 | 0.005836  | -0.009167 | 0.003463  |
| O | -1.223866 | 12.517207 | 2.155216 | -0.094507 | 0.019371  | 0.016170  |
| O | 3.677009  | 1.284394  | 4.211574 | -0.086693 | 0.014644  | 0.008784  |
| O | 5.831438  | 5.616407  | 1.028179 | 0.093704  | 0.019565  | -0.015610 |
| O | -3.378295 | 8.185194  | 5.338611 | 0.087777  | 0.014457  | -0.009357 |
| H | -0.637445 | 12.195109 | 2.878812 | -0.107736 | -0.000245 | 0.016493  |
| H | 3.090587  | 1.606491  | 3.487978 | -0.100526 | -0.004508 | 0.009762  |
| H | 5.245016  | 5.294309  | 0.304583 | 0.106921  | -0.000053 | -0.015929 |
| H | -2.791874 | 8.507292  | 6.062207 | 0.101635  | -0.004745 | -0.010324 |

168 f = 3.858239 THz 24.242033 2PiTHz 128.697009 cm-1 15.956401 meV

|    | X        | Y        | Z        | dx        | dy       | dz        |
|----|----------|----------|----------|-----------|----------|-----------|
| Li | 3.769818 | 9.645336 | 4.001386 | -0.008511 | 0.022994 | -0.006404 |

|    |           |           |          |           |           |           |
|----|-----------|-----------|----------|-----------|-----------|-----------|
| Li | -1.316675 | 4.156264  | 2.365404 | 0.007729  | -0.023188 | 0.006371  |
| Li | -3.471104 | 2.744536  | 5.548798 | -0.007729 | -0.022839 | -0.006221 |
| Li | 5.924247  | 11.057064 | 0.817991 | 0.008516  | 0.022748  | 0.006265  |
| Na | 2.049025  | 6.784862  | 1.629696 | -0.050476 | 0.001488  | 0.006360  |
| Na | 0.404117  | 7.016739  | 4.737094 | 0.052178  | -0.001050 | -0.006093 |
| Na | 2.558546  | 13.685662 | 1.553699 | -0.052367 | -0.000992 | 0.006550  |
| Na | -0.105403 | 0.115939  | 4.813091 | 0.050539  | 0.001394  | -0.006594 |
| B  | 4.155007  | 8.978944  | 1.168663 | 0.004020  | 0.029518  | 0.006145  |
| B  | -1.701865 | 4.822656  | 5.198127 | -0.003420 | -0.028975 | -0.005814 |
| B  | 0.452564  | 2.078144  | 2.014732 | 0.003556  | -0.029090 | 0.005730  |
| B  | 2.000578  | 11.723457 | 4.352058 | -0.004083 | 0.029593  | -0.006097 |
| B  | -2.733891 | 11.746082 | 5.839177 | -0.001495 | 0.014562  | -0.011819 |
| B  | 5.187034  | 2.055518  | 0.527613 | 0.001163  | -0.015011 | 0.011336  |
| B  | 3.032605  | 4.845282  | 3.711007 | -0.001080 | -0.014915 | -0.011371 |
| B  | -0.579463 | 8.956318  | 2.655782 | 0.001505  | 0.014483  | 0.011760  |
| B  | -0.983708 | 0.054306  | 1.827988 | -0.019028 | -0.016928 | 0.014715  |
| B  | 3.436850  | 13.747295 | 4.538802 | 0.019293  | 0.016720  | -0.015368 |
| B  | 5.591279  | 6.955106  | 1.355407 | -0.019620 | 0.016490  | 0.015644  |
| B  | -3.138137 | 6.846495  | 5.011383 | 0.019277  | -0.016724 | -0.014949 |
| Si | 0.631772  | 3.486686  | 4.508512 | 0.001333  | -0.018765 | 0.004113  |
| Si | 1.821370  | 10.314915 | 1.858278 | -0.001317 | 0.018810  | -0.004361 |
| Si | -0.333059 | 10.387486 | 5.041673 | 0.001314  | 0.018661  | 0.004321  |
| Si | 2.786201  | 3.414115  | 1.325117 | -0.001235 | -0.018632 | -0.004143 |
| O  | 0.061445  | 3.072947  | 3.041906 | -0.005708 | -0.041617 | 0.013263  |
| O  | 2.391697  | 10.728653 | 3.324884 | 0.005474  | 0.042344  | -0.013668 |
| O  | 4.546126  | 9.973747  | 0.141489 | -0.005373 | 0.042001  | 0.013525  |
| O  | -2.092984 | 3.827853  | 6.225301 | 0.005666  | -0.041243 | -0.013167 |
| O  | 2.197450  | 3.933608  | 4.519003 | -0.001689 | -0.008826 | -0.004927 |
| O  | 0.255692  | 9.867992  | 1.847787 | 0.002107  | 0.007593  | 0.004395  |
| O  | -1.898737 | 10.834409 | 5.031182 | -0.002051 | 0.007633  | -0.004399 |
| O  | 4.351879  | 2.967192  | 1.335608 | 0.001718  | -0.008882 | 0.004802  |
| O  | -0.212316 | 4.798696  | 5.055280 | -0.002980 | -0.016188 | -0.007241 |
| O  | 2.665458  | 9.002905  | 1.311510 | 0.003653  | 0.016533  | 0.007619  |
| O  | 0.511030  | 11.699496 | 4.494905 | -0.003672 | 0.016388  | -0.007601 |
| O  | 1.942113  | 2.102105  | 1.871885 | 0.003079  | -0.016045 | 0.007208  |
| O  | 0.525580  | 2.169271  | 5.472081 | 0.012789  | -0.013056 | 0.010607  |

|   |           |           |          |           |           |           |
|---|-----------|-----------|----------|-----------|-----------|-----------|
| O | 1.927562  | 11.632329 | 0.894709 | -0.013680 | 0.013142  | -0.010898 |
| O | -0.226867 | 9.070071  | 4.078104 | 0.013676  | 0.013019  | 0.010834  |
| O | 2.680009  | 4.731529  | 2.288686 | -0.012619 | -0.012918 | -0.010647 |
| O | 0.058846  | 0.698526  | 2.444964 | 0.009415  | -0.036907 | -0.009766 |
| O | 2.394296  | 13.103075 | 3.921826 | -0.009906 | 0.037513  | 0.009605  |
| O | 4.548725  | 7.599326  | 0.738431 | 0.009540  | 0.037278  | -0.009270 |
| O | -2.095583 | 6.202275  | 5.628359 | -0.009012 | -0.036601 | 0.009405  |
| O | -2.459230 | 13.184059 | 5.445139 | 0.013199  | 0.007455  | -0.016932 |
| O | 4.912372  | 0.617542  | 0.921651 | -0.012896 | -0.008264 | 0.015869  |
| O | 2.757943  | 6.283259  | 4.105046 | 0.013013  | -0.008184 | -0.015884 |
| O | -0.304801 | 7.518342  | 2.261744 | -0.013289 | 0.007367  | 0.016880  |
| O | -0.175430 | 2.374756  | 0.744070 | 0.003597  | -0.021608 | 0.008520  |
| O | 2.628573  | 11.426844 | 5.622720 | -0.004002 | 0.021684  | -0.009103 |
| O | 4.783002  | 9.275557  | 2.439325 | 0.004036  | 0.021750  | 0.009060  |
| O | -2.329859 | 4.526044  | 3.927465 | -0.003538 | -0.021601 | -0.008509 |
| O | -1.223866 | 12.517207 | 2.155216 | -0.049993 | -0.006887 | 0.031825  |
| O | 3.677009  | 1.284394  | 4.211574 | 0.051453  | 0.006510  | -0.032364 |
| O | 5.831438  | 5.616407  | 1.028179 | -0.052051 | 0.006213  | 0.032793  |
| O | -3.378295 | 8.185194  | 5.338611 | 0.050204  | -0.006683 | -0.032081 |
| H | -0.637445 | 12.195109 | 2.878812 | -0.052707 | -0.010087 | 0.032637  |
| H | 3.090587  | 1.606491  | 3.487978 | 0.054209  | 0.010391  | -0.032855 |
| H | 5.245016  | 5.294309  | 0.304583 | -0.054832 | 0.010134  | 0.033289  |
| H | -2.791874 | 8.507292  | 6.062207 | 0.052878  | -0.009850 | -0.032879 |

169 f = 3.689422 THz 23.181325 2PiTHz 123.065884 cm-1 15.258230 meV

|    | X         | Y         | Z        | dx        | dy        | dz        |
|----|-----------|-----------|----------|-----------|-----------|-----------|
| Li | 3.769818  | 9.645336  | 4.001386 | -0.011246 | -0.004469 | -0.011928 |
| Li | -1.316675 | 4.156264  | 2.365404 | -0.012280 | -0.004542 | -0.012900 |
| Li | -3.471104 | 2.744536  | 5.548798 | -0.012204 | 0.004559  | -0.012857 |
| Li | 5.924247  | 11.057064 | 0.817991 | -0.011293 | 0.004478  | -0.011964 |
| Na | 2.049025  | 6.784862  | 1.629696 | -0.015903 | 0.012506  | 0.064391  |
| Na | 0.404117  | 7.016739  | 4.737094 | -0.018779 | 0.012023  | 0.065267  |
| Na | 2.558546  | 13.685662 | 1.553699 | -0.018709 | -0.011866 | 0.065106  |
| Na | -0.105403 | 0.115939  | 4.813091 | -0.016029 | -0.012632 | 0.064349  |



|    |           |           |          |           |           |           |
|----|-----------|-----------|----------|-----------|-----------|-----------|
| B  | 4.155007  | 8.978944  | 1.168663 | -0.005133 | -0.008266 | 0.004787  |
| B  | -1.701865 | 4.822656  | 5.198127 | -0.005578 | -0.008826 | 0.004739  |
| B  | 0.452564  | 2.078144  | 2.014732 | -0.005666 | 0.008861  | 0.004706  |
| B  | 2.000578  | 11.723457 | 4.352058 | -0.005084 | 0.008252  | 0.004788  |
| B  | -2.733891 | 11.746082 | 5.839177 | 0.013037  | -0.004726 | -0.019853 |
| B  | 5.187034  | 2.055518  | 0.527613 | 0.013167  | -0.005177 | -0.020809 |
| B  | 3.032605  | 4.845282  | 3.711007 | 0.013221  | 0.005113  | -0.020727 |
| B  | -0.579463 | 8.956318  | 2.655782 | 0.013026  | 0.004764  | -0.019908 |
| B  | -0.983708 | 0.054306  | 1.827988 | -0.005344 | 0.006479  | -0.003705 |
| B  | 3.436850  | 13.747295 | 4.538802 | -0.005363 | 0.006451  | -0.003482 |
| B  | 5.591279  | 6.955106  | 1.355407 | -0.005349 | -0.006433 | -0.003526 |
| B  | -3.138137 | 6.846495  | 5.011383 | -0.005301 | -0.006489 | -0.003670 |
| Si | 0.631772  | 3.486686  | 4.508512 | 0.005038  | 0.020489  | -0.009633 |
| Si | 1.821370  | 10.314915 | 1.858278 | 0.005240  | 0.020185  | -0.009028 |
| Si | -0.333059 | 10.387486 | 5.041673 | 0.005247  | -0.020168 | -0.009044 |
| Si | 2.786201  | 3.414115  | 1.325117 | 0.005031  | -0.020512 | -0.009599 |
| O  | 0.061445  | 3.072947  | 3.041906 | 0.006587  | 0.032282  | -0.013513 |
| O  | 2.391697  | 10.728653 | 3.324884 | 0.007330  | 0.031353  | -0.012952 |
| O  | 4.546126  | 9.973747  | 0.141489 | 0.007312  | -0.031399 | -0.012976 |
| O  | -2.092984 | 3.827853  | 6.225301 | 0.006595  | -0.032172 | -0.013441 |
| O  | 2.197450  | 3.933608  | 4.519003 | 0.003188  | 0.025448  | -0.011248 |
| O  | 0.255692  | 9.867992  | 1.847787 | 0.003555  | 0.024695  | -0.010200 |
| O  | -1.898737 | 10.834409 | 5.031182 | 0.003588  | -0.024598 | -0.010197 |
| O  | 4.351879  | 2.967192  | 1.335608 | 0.003151  | -0.025566 | -0.011250 |
| O  | -0.212316 | 4.798696  | 5.055280 | -0.001303 | 0.009110  | 0.012430  |
| O  | 2.665458  | 9.002905  | 1.311510 | -0.000922 | 0.009514  | 0.011782  |
| O  | 0.511030  | 11.699496 | 4.494905 | -0.000874 | -0.009518 | 0.011789  |
| O  | 1.942113  | 2.102105  | 1.871885 | -0.001386 | -0.009110 | 0.012387  |
| O  | 0.525580  | 2.169271  | 5.472081 | 0.024130  | 0.010156  | -0.021666 |
| O  | 1.927562  | 11.632329 | 0.894709 | 0.023258  | 0.010377  | -0.020505 |
| O  | -0.226867 | 9.070071  | 4.078104 | 0.023221  | -0.010348 | -0.020547 |
| O  | 2.680009  | 4.731529  | 2.288686 | 0.024234  | -0.010203 | -0.021596 |
| O  | 0.058846  | 0.698526  | 2.444964 | -0.029647 | 0.020157  | 0.023116  |
| O  | 2.394296  | 13.103075 | 3.921826 | -0.029003 | 0.019447  | 0.022800  |
| O  | 4.548725  | 7.599326  | 0.738431 | -0.029072 | -0.019479 | 0.022833  |
| O  | -2.095583 | 6.202275  | 5.628359 | -0.029498 | -0.020076 | 0.023070  |

|   |           |           |          |           |           |           |
|---|-----------|-----------|----------|-----------|-----------|-----------|
| O | -2.459230 | 13.184059 | 5.445139 | 0.017760  | -0.010927 | -0.037322 |
| O | 4.912372  | 0.617542  | 0.921651 | 0.018360  | -0.011551 | -0.038486 |
| O | 2.757943  | 6.283259  | 4.105046 | 0.018372  | 0.011464  | -0.038368 |
| O | -0.304801 | 7.518342  | 2.261744 | 0.017814  | 0.010992  | -0.037442 |
| O | -0.175430 | 2.374756  | 0.744070 | 0.009647  | -0.001490 | -0.005148 |
| O | 2.628573  | 11.426844 | 5.622720 | 0.009725  | -0.001604 | -0.004754 |
| O | 4.783002  | 9.275557  | 2.439325 | 0.009697  | 0.001600  | -0.004771 |
| O | -2.329859 | 4.526044  | 3.927465 | 0.009708  | 0.001461  | -0.005081 |
| O | -1.223866 | 12.517207 | 2.155216 | -0.008900 | 0.006176  | -0.005543 |
| O | 3.677009  | 1.284394  | 4.211574 | -0.009504 | 0.006134  | -0.005733 |
| O | 5.831438  | 5.616407  | 1.028179 | -0.009487 | -0.006115 | -0.005795 |
| O | -3.378295 | 8.185194  | 5.338611 | -0.008918 | -0.006194 | -0.005499 |
| H | -0.637445 | 12.195109 | 2.878812 | -0.025450 | 0.007538  | 0.007412  |
| H | 3.090587  | 1.606491  | 3.487978 | -0.026105 | 0.007141  | 0.007097  |
| H | 5.245016  | 5.294309  | 0.304583 | -0.026088 | -0.007118 | 0.007026  |
| H | -2.791874 | 8.507292  | 6.062207 | -0.025488 | -0.007554 | 0.007476  |

170 f = 3.439624 THz 21.611796 2PiTHz 114.733506 cm-1 14.225147 meV

|    | X         | Y         | Z        | dx        | dy        | dz        |
|----|-----------|-----------|----------|-----------|-----------|-----------|
| Li | 3.769818  | 9.645336  | 4.001386 | -0.015032 | 0.000935  | -0.021335 |
| Li | -1.316675 | 4.156264  | 2.365404 | 0.014656  | -0.001282 | 0.020622  |
| Li | -3.471104 | 2.744536  | 5.548798 | 0.014183  | 0.001397  | 0.020952  |
| Li | 5.924247  | 11.057064 | 0.817991 | -0.015521 | -0.000803 | -0.021005 |
| Na | 2.049025  | 6.784862  | 1.629696 | -0.078211 | -0.022176 | -0.021425 |
| Na | 0.404117  | 7.016739  | 4.737094 | 0.080331  | 0.022118  | 0.019924  |
| Na | 2.558546  | 13.685662 | 1.553699 | 0.081804  | -0.022675 | 0.022185  |
| Na | -0.105403 | 0.115939  | 4.813091 | -0.076865 | 0.021624  | -0.019241 |
| B  | 4.155007  | 8.978944  | 1.168663 | -0.008599 | -0.013219 | -0.001709 |
| B  | -1.701865 | 4.822656  | 5.198127 | 0.007582  | 0.012744  | 0.001763  |
| B  | 0.452564  | 2.078144  | 2.014732 | 0.007980  | -0.012933 | 0.002274  |
| B  | 2.000578  | 11.723457 | 4.352058 | -0.008211 | 0.013048  | -0.001188 |
| B  | -2.733891 | 11.746082 | 5.839177 | 0.006813  | -0.006561 | -0.018165 |
| B  | 5.187034  | 2.055518  | 0.527613 | -0.006018 | 0.006516  | 0.017831  |
| B  | 3.032605  | 4.845282  | 3.711007 | -0.006324 | -0.006383 | 0.017288  |

|    |           |           |          |           |           |           |
|----|-----------|-----------|----------|-----------|-----------|-----------|
| B  | -0.579463 | 8.956318  | 2.655782 | 0.006534  | 0.006747  | -0.018728 |
| B  | -0.983708 | 0.054306  | 1.827988 | -0.000772 | -0.002959 | 0.001755  |
| B  | 3.436850  | 13.747295 | 4.538802 | 0.000326  | 0.003366  | -0.000935 |
| B  | 5.591279  | 6.955106  | 1.355407 | 0.000057  | -0.003204 | -0.001894 |
| B  | -3.138137 | 6.846495  | 5.011383 | -0.001116 | 0.003075  | 0.000824  |
| Si | 0.631772  | 3.486686  | 4.508512 | 0.000320  | -0.006342 | 0.012632  |
| Si | 1.821370  | 10.314915 | 1.858278 | -0.000290 | 0.007964  | -0.012452 |
| Si | -0.333059 | 10.387486 | 5.041673 | -0.000385 | -0.008002 | -0.012720 |
| Si | 2.786201  | 3.414115  | 1.325117 | 0.000252  | 0.006268  | 0.012369  |
| O  | 0.061445  | 3.072947  | 3.041906 | 0.008502  | -0.020726 | 0.013075  |
| O  | 2.391697  | 10.728653 | 3.324884 | -0.007811 | 0.022421  | -0.013098 |
| O  | 4.546126  | 9.973747  | 0.141489 | -0.008032 | -0.022543 | -0.013416 |
| O  | -2.092984 | 3.827853  | 6.225301 | 0.008302  | 0.020577  | 0.012766  |
| O  | 2.197450  | 3.933608  | 4.519003 | 0.003859  | -0.016343 | 0.019352  |
| O  | 0.255692  | 9.867992  | 1.847787 | -0.004137 | 0.018875  | -0.018999 |
| O  | -1.898737 | 10.834409 | 5.031182 | -0.004069 | -0.018404 | -0.019077 |
| O  | 4.351879  | 2.967192  | 1.335608 | 0.003943  | 0.016740  | 0.019279  |
| O  | -0.212316 | 4.798696  | 5.055280 | 0.005940  | 0.007916  | -0.009087 |
| O  | 2.665458  | 9.002905  | 1.311510 | -0.006707 | -0.006870 | 0.009743  |
| O  | 0.511030  | 11.699496 | 4.494905 | -0.006363 | 0.006726  | 0.009933  |
| O  | 1.942113  | 2.102105  | 1.871885 | 0.006295  | -0.008076 | -0.008877 |
| O  | 0.525580  | 2.169271  | 5.472081 | -0.019288 | 0.002007  | 0.021557  |
| O  | 1.927562  | 11.632329 | 0.894709 | 0.020768  | -0.000831 | -0.021880 |
| O  | -0.226867 | 9.070071  | 4.078104 | 0.020114  | 0.000830  | -0.022288 |
| O  | 2.680009  | 4.731529  | 2.288686 | -0.019922 | -0.002046 | 0.021158  |
| O  | 0.058846  | 0.698526  | 2.444964 | 0.010249  | -0.015900 | -0.006516 |
| O  | 2.394296  | 13.103075 | 3.921826 | -0.012211 | 0.016949  | 0.008906  |
| O  | 4.548725  | 7.599326  | 0.738431 | -0.012666 | -0.017024 | 0.008111  |
| O  | -2.095583 | 6.202275  | 5.628359 | 0.009758  | 0.015813  | -0.007303 |
| O  | -2.459230 | 13.184059 | 5.445139 | 0.014672  | -0.011407 | -0.025023 |
| O  | 4.912372  | 0.617542  | 0.921651 | -0.013268 | 0.010765  | 0.023250  |
| O  | 2.757943  | 6.283259  | 4.105046 | -0.013557 | -0.010562 | 0.022313  |
| O  | -0.304801 | 7.518342  | 2.261744 | 0.014461  | 0.011679  | -0.026008 |
| O  | -0.175430 | 2.374756  | 0.744070 | -0.002393 | -0.002041 | 0.008922  |
| O  | 2.628573  | 11.426844 | 5.622720 | 0.002879  | 0.002130  | -0.008177 |
| O  | 4.783002  | 9.275557  | 2.439325 | 0.002641  | -0.002150 | -0.008812 |

|   |           |           |          |           |           |           |
|---|-----------|-----------|----------|-----------|-----------|-----------|
| O | -2.329859 | 4.526044  | 3.927465 | -0.002651 | 0.001999  | 0.008305  |
| O | -1.223866 | 12.517207 | 2.155216 | -0.013870 | -0.003307 | -0.005961 |
| O | 3.677009  | 1.284394  | 4.211574 | 0.011948  | 0.003986  | 0.006923  |
| O | 5.831438  | 5.616407  | 1.028179 | 0.012001  | -0.003777 | 0.006006  |
| O | -3.378295 | 8.185194  | 5.338611 | -0.013923 | 0.003479  | -0.006888 |
| H | -0.637445 | 12.195109 | 2.878812 | -0.012882 | -0.013944 | -0.011810 |
| H | 3.090587  | 1.606491  | 3.487978 | 0.009683  | 0.014144  | 0.013519  |
| H | 5.245016  | 5.294309  | 0.304583 | 0.009635  | -0.014014 | 0.012713  |
| H | -2.791874 | 8.507292  | 6.062207 | -0.013074 | 0.014053  | -0.012605 |

171 f = 3.410721 THz 21.430195 2PiTHz 113.769416 cm-1 14.105615 meV

|    | X         | Y         | Z        | dx        | dy        | dz        |
|----|-----------|-----------|----------|-----------|-----------|-----------|
| Li | 3.769818  | 9.645336  | 4.001386 | 0.013644  | 0.006091  | -0.009364 |
| Li | -1.316675 | 4.156264  | 2.365404 | 0.013343  | 0.005145  | -0.010031 |
| Li | -3.471104 | 2.744536  | 5.548798 | -0.013975 | 0.005216  | 0.009268  |
| Li | 5.924247  | 11.057064 | 0.817991 | -0.012982 | 0.006020  | 0.010121  |
| Na | 2.049025  | 6.784862  | 1.629696 | -0.042174 | -0.020209 | -0.068528 |
| Na | 0.404117  | 7.016739  | 4.737094 | -0.045740 | -0.021889 | -0.071026 |
| Na | 2.558546  | 13.685662 | 1.553699 | 0.043425  | -0.021006 | 0.070383  |
| Na | -0.105403 | 0.115939  | 4.813091 | 0.044194  | -0.021077 | 0.069292  |
| B  | 4.155007  | 8.978944  | 1.168663 | -0.011404 | -0.003210 | -0.014561 |
| B  | -1.701865 | 4.822656  | 5.198127 | -0.012041 | -0.004872 | -0.014791 |
| B  | 0.452564  | 2.078144  | 2.014732 | 0.011742  | -0.004411 | 0.014728  |
| B  | 2.000578  | 11.723457 | 4.352058 | 0.011745  | -0.003662 | 0.014616  |
| B  | -2.733891 | 11.746082 | 5.839177 | 0.008700  | 0.006307  | 0.015377  |
| B  | 5.187034  | 2.055518  | 0.527613 | 0.009135  | 0.005200  | 0.014985  |
| B  | 3.032605  | 4.845282  | 3.711007 | -0.008873 | 0.005521  | -0.015707 |
| B  | -0.579463 | 8.956318  | 2.655782 | -0.008921 | 0.005990  | -0.014661 |
| B  | -0.983708 | 0.054306  | 1.827988 | 0.008637  | 0.005857  | 0.028667  |
| B  | 3.436850  | 13.747295 | 4.538802 | 0.008710  | 0.006563  | 0.028300  |
| B  | 5.591279  | 6.955106  | 1.355407 | -0.008827 | 0.006597  | -0.028167 |
| B  | -3.138137 | 6.846495  | 5.011383 | -0.008484 | 0.005813  | -0.028794 |
| Si | 0.631772  | 3.486686  | 4.508512 | 0.002147  | -0.001463 | 0.007301  |
| Si | 1.821370  | 10.314915 | 1.858278 | 0.002195  | -0.000825 | 0.007617  |

|    |           |           |          |           |           |           |
|----|-----------|-----------|----------|-----------|-----------|-----------|
| Si | -0.333059 | 10.387486 | 5.041673 | -0.002132 | -0.000541 | -0.007149 |
| Si | 2.786201  | 3.414115  | 1.325117 | -0.002165 | -0.001708 | -0.007782 |
| O  | 0.061445  | 3.072947  | 3.041906 | 0.007173  | -0.001274 | 0.007540  |
| O  | 2.391697  | 10.728653 | 3.324884 | 0.007524  | -0.000601 | 0.007693  |
| O  | 4.546126  | 9.973747  | 0.141489 | -0.007184 | 0.000209  | -0.007203 |
| O  | -2.092984 | 3.827853  | 6.225301 | -0.007506 | -0.002064 | -0.008034 |
| O  | 2.197450  | 3.933608  | 4.519003 | -0.002997 | 0.014749  | 0.003327  |
| O  | 0.255692  | 9.867992  | 1.847787 | -0.002626 | 0.014403  | 0.004032  |
| O  | -1.898737 | 10.834409 | 5.031182 | 0.002854  | 0.015199  | -0.003311 |
| O  | 4.351879  | 2.967192  | 1.335608 | 0.002812  | 0.013996  | -0.004098 |
| O  | -0.212316 | 4.798696  | 5.055280 | -0.011110 | -0.005273 | -0.005334 |
| O  | 2.665458  | 9.002905  | 1.311510 | -0.010533 | -0.004055 | -0.005447 |
| O  | 0.511030  | 11.699496 | 4.494905 | 0.010812  | -0.004307 | 0.005078  |
| O  | 1.942113  | 2.102105  | 1.871885 | 0.010875  | -0.004971 | 0.005713  |
| O  | 0.525580  | 2.169271  | 5.472081 | 0.019500  | -0.001111 | 0.010337  |
| O  | 1.927562  | 11.632329 | 0.894709 | 0.018230  | -0.000177 | 0.010940  |
| O  | -0.226867 | 9.070071  | 4.078104 | -0.018966 | -0.000269 | -0.010083 |
| O  | 2.680009  | 4.731529  | 2.288686 | -0.018704 | -0.000973 | -0.011213 |
| O  | 0.058846  | 0.698526  | 2.444964 | 0.012676  | -0.000268 | 0.024775  |
| O  | 2.394296  | 13.103075 | 3.921826 | 0.012679  | 0.000387  | 0.024545  |
| O  | 4.548725  | 7.599326  | 0.738431 | -0.012204 | 0.001008  | -0.024864 |
| O  | -2.095583 | 6.202275  | 5.628359 | -0.013072 | -0.000873 | -0.024476 |
| O  | -2.459230 | 13.184059 | 5.445139 | 0.007334  | 0.008831  | 0.027971  |
| O  | 4.912372  | 0.617542  | 0.921651 | 0.007758  | 0.007810  | 0.027704  |
| O  | 2.757943  | 6.283259  | 4.105046 | -0.007158 | 0.008319  | -0.028656 |
| O  | -0.304801 | 7.518342  | 2.261744 | -0.007914 | 0.008294  | -0.026976 |
| O  | -0.175430 | 2.374756  | 0.744070 | 0.007985  | -0.000613 | 0.017422  |
| O  | 2.628573  | 11.426844 | 5.622720 | 0.007657  | 0.000307  | 0.017462  |
| O  | 4.783002  | 9.275557  | 2.439325 | -0.007709 | 0.000364  | -0.017149 |
| O  | -2.329859 | 4.526044  | 3.927465 | -0.007888 | -0.000662 | -0.017746 |
| O  | -1.223866 | 12.517207 | 2.155216 | -0.000877 | 0.007430  | 0.027963  |
| O  | 3.677009  | 1.284394  | 4.211574 | -0.000423 | 0.007800  | 0.026638  |
| O  | 5.831438  | 5.616407  | 1.028179 | -0.000230 | 0.007835  | -0.026789 |
| O  | -3.378295 | 8.185194  | 5.338611 | 0.001572  | 0.007387  | -0.027809 |
| H  | -0.637445 | 12.195109 | 2.878812 | 0.001994  | 0.005018  | 0.024753  |
| H  | 3.090587  | 1.606491  | 3.487978 | 0.002236  | 0.005123  | 0.023433  |

|   |           |          |          |           |          |           |
|---|-----------|----------|----------|-----------|----------|-----------|
| H | 5.245016  | 5.294309 | 0.304583 | -0.002883 | 0.005565 | -0.023786 |
| H | -2.791874 | 8.507292 | 6.062207 | -0.001290 | 0.004561 | -0.024405 |

172 f = 3.290897 THz 20.677313 2PiTHz 109.772492 cm-1 13.610059 meV

|    | X         | Y         | Z        | dx        | dy        | dz        |
|----|-----------|-----------|----------|-----------|-----------|-----------|
| Li | 3.769818  | 9.645336  | 4.001386 | -0.031621 | -0.016912 | -0.011914 |
| Li | -1.316675 | 4.156264  | 2.365404 | 0.032023  | 0.017224  | 0.011672  |
| Li | -3.471104 | 2.744536  | 5.548798 | 0.031949  | -0.017156 | 0.011702  |
| Li | 5.924247  | 11.057064 | 0.817991 | -0.031717 | 0.016980  | -0.011885 |
| Na | 2.049025  | 6.784862  | 1.629696 | 0.048261  | 0.009064  | 0.004239  |
| Na | 0.404117  | 7.016739  | 4.737094 | -0.051556 | -0.009055 | -0.002653 |
| Na | 2.558546  | 13.685662 | 1.553699 | -0.051127 | 0.008869  | -0.002307 |
| Na | -0.105403 | 0.115939  | 4.813091 | 0.048438  | -0.009219 | 0.004525  |
| B  | 4.155007  | 8.978944  | 1.168663 | -0.017126 | -0.005284 | -0.003313 |
| B  | -1.701865 | 4.822656  | 5.198127 | 0.017357  | 0.005235  | 0.002820  |
| B  | 0.452564  | 2.078144  | 2.014732 | 0.017436  | -0.005269 | 0.002863  |
| B  | 2.000578  | 11.723457 | 4.352058 | -0.017064 | 0.005240  | -0.003251 |
| B  | -2.733891 | 11.746082 | 5.839177 | -0.003322 | -0.011200 | -0.023177 |
| B  | 5.187034  | 2.055518  | 0.527613 | 0.003356  | 0.011317  | 0.023168  |
| B  | 3.032605  | 4.845282  | 3.711007 | 0.003293  | -0.011266 | 0.023125  |
| B  | -0.579463 | 8.956318  | 2.655782 | -0.003353 | 0.011272  | -0.023254 |
| B  | -0.983708 | 0.054306  | 1.827988 | -0.003701 | 0.007249  | 0.021648  |
| B  | 3.436850  | 13.747295 | 4.538802 | 0.004044  | -0.007160 | -0.021586 |
| B  | 5.591279  | 6.955106  | 1.355407 | 0.004121  | 0.007232  | -0.021773 |
| B  | -3.138137 | 6.846495  | 5.011383 | -0.003705 | -0.007187 | 0.021507  |
| Si | 0.631772  | 3.486686  | 4.508512 | 0.013394  | -0.018894 | 0.012193  |
| Si | 1.821370  | 10.314915 | 1.858278 | -0.013228 | 0.018237  | -0.012539 |
| Si | -0.333059 | 10.387486 | 5.041673 | -0.013244 | -0.018237 | -0.012564 |
| Si | 2.786201  | 3.414115  | 1.325117 | 0.013400  | 0.018883  | 0.012176  |
| O  | 0.061445  | 3.072947  | 3.041906 | 0.010397  | -0.021032 | 0.013516  |
| O  | 2.391697  | 10.728653 | 3.324884 | -0.010471 | 0.020620  | -0.013826 |
| O  | 4.546126  | 9.973747  | 0.141489 | -0.010531 | -0.020635 | -0.013847 |
| O  | -2.092984 | 3.827853  | 6.225301 | 0.010343  | 0.021030  | 0.013516  |
| O  | 2.197450  | 3.933608  | 4.519003 | 0.019132  | -0.038554 | 0.009844  |

|   |           |           |          |           |           |           |
|---|-----------|-----------|----------|-----------|-----------|-----------|
| O | 0.255692  | 9.867992  | 1.847787 | -0.018936 | 0.037837  | -0.010431 |
| O | -1.898737 | 10.834409 | 5.031182 | -0.018895 | -0.037652 | -0.010487 |
| O | 4.351879  | 2.967192  | 1.335608 | 0.019184  | 0.038686  | 0.009786  |
| O | -0.212316 | 4.798696  | 5.055280 | 0.017380  | -0.009651 | -0.002870 |
| O | 2.665458  | 9.002905  | 1.311510 | -0.017182 | 0.009021  | 0.002368  |
| O | 0.511030  | 11.699496 | 4.494905 | -0.017110 | -0.009069 | 0.002403  |
| O | 1.942113  | 2.102105  | 1.871885 | 0.017466  | 0.009595  | -0.002835 |
| O | 0.525580  | 2.169271  | 5.472081 | -0.004389 | -0.007699 | 0.023293  |
| O | 1.927562  | 11.632329 | 0.894709 | 0.004503  | 0.007128  | -0.023467 |
| O | -0.226867 | 9.070071  | 4.078104 | 0.004388  | -0.007131 | -0.023506 |
| O | 2.680009  | 4.731529  | 2.288686 | -0.004487 | 0.007680  | 0.023274  |
| O | 0.058846  | 0.698526  | 2.444964 | 0.030975  | -0.015745 | -0.010005 |
| O | 2.394296  | 13.103075 | 3.921826 | -0.029989 | 0.015468  | 0.009486  |
| O | 4.548725  | 7.599326  | 0.738431 | -0.030015 | -0.015498 | 0.009376  |
| O | -2.095583 | 6.202275  | 5.628359 | 0.030920  | 0.015736  | -0.010108 |
| O | -2.459230 | 13.184059 | 5.445139 | 0.015675  | -0.024629 | -0.045346 |
| O | 4.912372  | 0.617542  | 0.921651 | -0.016053 | 0.025102  | 0.046326  |
| O | 2.757943  | 6.283259  | 4.105046 | -0.016074 | -0.025017 | 0.046199  |
| O | -0.304801 | 7.518342  | 2.261744 | 0.015746  | 0.024750  | -0.045544 |
| O | -0.175430 | 2.374756  | 0.744070 | 0.010404  | -0.002336 | 0.007598  |
| O | 2.628573  | 11.426844 | 5.622720 | -0.010248 | 0.002197  | -0.007928 |
| O | 4.783002  | 9.275557  | 2.439325 | -0.010294 | -0.002222 | -0.008006 |
| O | -2.329859 | 4.526044  | 3.927465 | 0.010336  | 0.002325  | 0.007545  |
| O | -1.223866 | 12.517207 | 2.155216 | -0.022433 | 0.009806  | 0.017589  |
| O | 3.677009  | 1.284394  | 4.211574 | 0.023300  | -0.009863 | -0.017746 |
| O | 5.831438  | 5.616407  | 1.028179 | 0.023551  | 0.009958  | -0.017921 |
| O | -3.378295 | 8.185194  | 5.338611 | -0.022278 | -0.009714 | 0.017430  |
| H | -0.637445 | 12.195109 | 2.878812 | -0.021694 | -0.005895 | 0.009761  |
| H | 3.090587  | 1.606491  | 3.487978 | 0.023039  | 0.006108  | -0.010158 |
| H | 5.245016  | 5.294309  | 0.304583 | 0.023314  | -0.006092 | -0.010312 |
| H | -2.791874 | 8.507292  | 6.062207 | -0.021541 | 0.005911  | 0.009640  |

173 f = 2.964905 THz    18.629045 2PiTHz    98.898567 cm-1    12.261864 meV

X                    Y                    Z                    dx                    dy                    dz

|    |           |           |          |           |           |           |
|----|-----------|-----------|----------|-----------|-----------|-----------|
| Li | 3.769818  | 9.645336  | 4.001386 | -0.002779 | 0.013749  | 0.004172  |
| Li | -1.316675 | 4.156264  | 2.365404 | 0.001320  | -0.015375 | -0.000625 |
| Li | -3.471104 | 2.744536  | 5.548798 | -0.001329 | -0.015340 | 0.000600  |
| Li | 5.924247  | 11.057064 | 0.817991 | 0.002852  | 0.013716  | -0.004129 |
| Na | 2.049025  | 6.784862  | 1.629696 | 0.065752  | 0.012469  | 0.026644  |
| Na | 0.404117  | 7.016739  | 4.737094 | -0.095629 | -0.011613 | -0.007223 |
| Na | 2.558546  | 13.685662 | 1.553699 | 0.095467  | -0.011538 | 0.007254  |
| Na | -0.105403 | 0.115939  | 4.813091 | -0.065970 | 0.012541  | -0.026695 |
| B  | 4.155007  | 8.978944  | 1.168663 | 0.001176  | 0.022726  | -0.000390 |
| B  | -1.701865 | 4.822656  | 5.198127 | -0.003712 | -0.023533 | 0.002513  |
| B  | 0.452564  | 2.078144  | 2.014732 | 0.003730  | -0.023536 | -0.002588 |
| B  | 2.000578  | 11.723457 | 4.352058 | -0.001116 | 0.022723  | 0.000424  |
| B  | -2.733891 | 11.746082 | 5.839177 | -0.001035 | 0.021008  | 0.001424  |
| B  | 5.187034  | 2.055518  | 0.527613 | 0.003156  | -0.019805 | -0.002935 |
| B  | 3.032605  | 4.845282  | 3.711007 | -0.003164 | -0.019792 | 0.002885  |
| B  | -0.579463 | 8.956318  | 2.655782 | 0.001069  | 0.021000  | -0.001349 |
| B  | -0.983708 | 0.054306  | 1.827988 | 0.001065  | -0.016537 | -0.000727 |
| B  | 3.436850  | 13.747295 | 4.538802 | 0.002512  | 0.015931  | -0.003385 |
| B  | 5.591279  | 6.955106  | 1.355407 | -0.002476 | 0.015925  | 0.003453  |
| B  | -3.138137 | 6.846495  | 5.011383 | -0.001031 | -0.016523 | 0.000664  |
| Si | 0.631772  | 3.486686  | 4.508512 | -0.001362 | -0.020768 | -0.001202 |
| Si | 1.821370  | 10.314915 | 1.858278 | 0.000391  | 0.021295  | 0.000353  |
| Si | -0.333059 | 10.387486 | 5.041673 | -0.000335 | 0.021345  | -0.000304 |
| Si | 2.786201  | 3.414115  | 1.325117 | 0.001368  | -0.020727 | 0.001138  |
| O  | 0.061445  | 3.072947  | 3.041906 | 0.002137  | -0.021241 | -0.002538 |
| O  | 2.391697  | 10.728653 | 3.324884 | -0.001229 | 0.019784  | 0.001470  |
| O  | 4.546126  | 9.973747  | 0.141489 | 0.001263  | 0.019829  | -0.001414 |
| O  | -2.092984 | 3.827853  | 6.225301 | -0.002160 | -0.021185 | 0.002492  |
| O  | 2.197450  | 3.933608  | 4.519003 | -0.002622 | -0.018773 | 0.002060  |
| O  | 0.255692  | 9.867992  | 1.847787 | 0.001298  | 0.019102  | -0.001608 |
| O  | -1.898737 | 10.834409 | 5.031182 | -0.001241 | 0.019171  | 0.001642  |
| O  | 4.351879  | 2.967192  | 1.335608 | 0.002620  | -0.018750 | -0.002142 |
| O  | -0.212316 | 4.798696  | 5.055280 | -0.004348 | -0.023525 | 0.000395  |
| O  | 2.665458  | 9.002905  | 1.311510 | 0.001825  | 0.022276  | -0.000304 |
| O  | 0.511030  | 11.699496 | 4.494905 | -0.001768 | 0.022320  | 0.000326  |
| O  | 1.942113  | 2.102105  | 1.871885 | 0.004353  | -0.023473 | -0.000466 |



|   |           |           |          |           |           |           |
|---|-----------|-----------|----------|-----------|-----------|-----------|
| O | 0.525580  | 2.169271  | 5.472081 | 0.000567  | -0.020821 | -0.001658 |
| O | 1.927562  | 11.632329 | 0.894709 | -0.000019 | 0.021679  | 0.000985  |
| O | -0.226867 | 9.070071  | 4.078104 | 0.000048  | 0.021711  | -0.000917 |
| O | 2.680009  | 4.731529  | 2.288686 | -0.000556 | -0.020786 | 0.001602  |
| O | 0.058846  | 0.698526  | 2.444964 | -0.000088 | -0.018779 | -0.001330 |
| O | 2.394296  | 13.103075 | 3.921826 | 0.002890  | 0.017731  | -0.002360 |
| O | 4.548725  | 7.599326  | 0.738431 | -0.002784 | 0.017759  | 0.002366  |
| O | -2.095583 | 6.202275  | 5.628359 | 0.000172  | -0.018743 | 0.001219  |
| O | -2.459230 | 13.184059 | 5.445139 | 0.001656  | 0.018771  | -0.000879 |
| O | 4.912372  | 0.617542  | 0.921651 | 0.002090  | -0.018487 | -0.002911 |
| O | 2.757943  | 6.283259  | 4.105046 | -0.002102 | -0.018489 | 0.002904  |
| O | -0.304801 | 7.518342  | 2.261744 | -0.001662 | 0.018727  | 0.001015  |
| O | -0.175430 | 2.374756  | 0.744070 | 0.003193  | -0.021476 | -0.002574 |
| O | 2.628573  | 11.426844 | 5.622720 | -0.000940 | 0.022289  | 0.000851  |
| O | 4.783002  | 9.275557  | 2.439325 | 0.000982  | 0.022298  | -0.000804 |
| O | -2.329859 | 4.526044  | 3.927465 | -0.003202 | -0.021468 | 0.002519  |
| O | -1.223866 | 12.517207 | 2.155216 | -0.013330 | -0.010827 | 0.010749  |
| O | 3.677009  | 1.284394  | 4.211574 | 0.013952  | 0.010449  | -0.016114 |
| O | 5.831438  | 5.616407  | 1.028179 | -0.013910 | 0.010443  | 0.016180  |
| O | -3.378295 | 8.185194  | 5.338611 | 0.013391  | -0.010817 | -0.010774 |
| H | -0.637445 | 12.195109 | 2.878812 | -0.007444 | -0.012447 | 0.005624  |
| H | 3.090587  | 1.606491  | 3.487978 | 0.005338  | 0.009808  | -0.010052 |
| H | 5.245016  | 5.294309  | 0.304583 | -0.005244 | 0.009808  | 0.010080  |
| H | -2.791874 | 8.507292  | 6.062207 | 0.007544  | -0.012460 | -0.005669 |

174 f = 2.861942 THz 17.982112 2PiTHz 95.464108 cm-1 11.836045 meV

|    | X         | Y         | Z        | dx        | dy        | dz        |
|----|-----------|-----------|----------|-----------|-----------|-----------|
| Li | 3.769818  | 9.645336  | 4.001386 | -0.003109 | -0.006560 | 0.008180  |
| Li | -1.316675 | 4.156264  | 2.365404 | -0.003872 | -0.001663 | 0.009034  |
| Li | -3.471104 | 2.744536  | 5.548798 | 0.003412  | -0.001474 | -0.008995 |
| Li | 5.924247  | 11.057064 | 0.817991 | 0.002662  | -0.006359 | -0.008117 |
| Na | 2.049025  | 6.784862  | 1.629696 | -0.100119 | -0.001364 | 0.044218  |
| Na | 0.404117  | 7.016739  | 4.737094 | -0.070419 | 0.003086  | 0.050548  |
| Na | 2.558546  | 13.685662 | 1.553699 | 0.073895  | 0.002930  | -0.051543 |

|    |           |           |          |           |           |           |
|----|-----------|-----------|----------|-----------|-----------|-----------|
| Na | -0.105403 | 0.115939  | 4.813091 | 0.103822  | -0.001519 | -0.045153 |
| B  | 4.155007  | 8.978944  | 1.168663 | -0.008175 | -0.006336 | 0.005168  |
| B  | -1.701865 | 4.822656  | 5.198127 | -0.007265 | 0.001458  | 0.004680  |
| B  | 0.452564  | 2.078144  | 2.014732 | 0.006817  | 0.001446  | -0.004390 |
| B  | 2.000578  | 11.723457 | 4.352058 | 0.007742  | -0.006378 | -0.004880 |
| B  | -2.733891 | 11.746082 | 5.839177 | 0.006471  | 0.000245  | -0.003588 |
| B  | 5.187034  | 2.055518  | 0.527613 | 0.005700  | 0.007126  | -0.002830 |
| B  | 3.032605  | 4.845282  | 3.711007 | -0.005813 | 0.007092  | 0.002718  |
| B  | -0.579463 | 8.956318  | 2.655782 | -0.006592 | 0.000219  | 0.003492  |
| B  | -0.983708 | 0.054306  | 1.827988 | 0.009603  | 0.001625  | -0.009142 |
| B  | 3.436850  | 13.747295 | 4.538802 | 0.009576  | -0.003794 | -0.008647 |
| B  | 5.591279  | 6.955106  | 1.355407 | -0.010089 | -0.003840 | 0.008697  |
| B  | -3.138137 | 6.846495  | 5.011383 | -0.010130 | 0.001562  | 0.009187  |
| Si | 0.631772  | 3.486686  | 4.508512 | -0.002399 | 0.005373  | -0.001714 |
| Si | 1.821370  | 10.314915 | 1.858278 | -0.002669 | -0.001763 | -0.001944 |
| Si | -0.333059 | 10.387486 | 5.041673 | 0.002336  | -0.002432 | 0.002103  |
| Si | 2.786201  | 3.414115  | 1.325117 | 0.002066  | 0.004679  | 0.001860  |
| O  | 0.061445  | 3.072947  | 3.041906 | 0.002661  | 0.000149  | -0.002139 |
| O  | 2.391697  | 10.728653 | 3.324884 | 0.003385  | -0.006666 | -0.002859 |
| O  | 4.546126  | 9.973747  | 0.141489 | -0.003377 | -0.007139 | 0.002946  |
| O  | -2.092984 | 3.827853  | 6.225301 | -0.002653 | -0.000367 | 0.002211  |
| O  | 2.197450  | 3.933608  | 4.519003 | -0.003422 | 0.005249  | 0.001271  |
| O  | 0.255692  | 9.867992  | 1.847787 | -0.004096 | -0.001081 | 0.002046  |
| O  | -1.898737 | 10.834409 | 5.031182 | 0.003727  | -0.001862 | -0.001616 |
| O  | 4.351879  | 2.967192  | 1.335608 | 0.003050  | 0.004444  | -0.000843 |
| O  | -0.212316 | 4.798696  | 5.055280 | -0.007004 | 0.000534  | 0.000158  |
| O  | 2.665458  | 9.002905  | 1.311510 | -0.008145 | -0.007347 | 0.000318  |
| O  | 0.511030  | 11.699496 | 4.494905 | 0.007752  | -0.007987 | -0.000029 |
| O  | 1.942113  | 2.102105  | 1.871885 | 0.006598  | -0.000108 | 0.000139  |
| O  | 0.525580  | 2.169271  | 5.472081 | 0.002467  | 0.006475  | -0.000884 |
| O  | 1.927562  | 11.632329 | 0.894709 | 0.002611  | -0.000832 | -0.001389 |
| O  | -0.226867 | 9.070071  | 4.078104 | -0.002763 | -0.001428 | 0.001420  |
| O  | 2.680009  | 4.731529  | 2.288686 | -0.002603 | 0.005852  | 0.000900  |
| O  | 0.058846  | 0.698526  | 2.444964 | 0.007142  | 0.000742  | -0.007551 |
| O  | 2.394296  | 13.103075 | 3.921826 | 0.006623  | -0.005277 | -0.007141 |
| O  | 4.548725  | 7.599326  | 0.738431 | -0.007751 | -0.005573 | 0.007759  |

|   |           |           |          |           |           |           |
|---|-----------|-----------|----------|-----------|-----------|-----------|
| O | -2.095583 | 6.202275  | 5.628359 | -0.008301 | 0.000414  | 0.008183  |
| O | -2.459230 | 13.184059 | 5.445139 | 0.010902  | -0.002191 | -0.009444 |
| O | 4.912372  | 0.617542  | 0.921651 | 0.010739  | 0.004051  | -0.009259 |
| O | 2.757943  | 6.283259  | 4.105046 | -0.010509 | 0.004362  | 0.008299  |
| O | -0.304801 | 7.518342  | 2.261744 | -0.010690 | -0.001888 | 0.008535  |
| O | -0.175430 | 2.374756  | 0.744070 | 0.005840  | 0.005988  | -0.003039 |
| O | 2.628573  | 11.426844 | 5.622720 | 0.006581  | -0.001404 | -0.003589 |
| O | 4.783002  | 9.275557  | 2.439325 | -0.006797 | -0.001492 | 0.003805  |
| O | -2.329859 | 4.526044  | 3.927465 | -0.006053 | 0.005880  | 0.003248  |
| O | -1.223866 | 12.517207 | 2.155216 | 0.002236  | 0.001575  | -0.014508 |
| O | 3.677009  | 1.284394  | 4.211574 | -0.002135 | -0.001982 | -0.009934 |
| O | 5.831438  | 5.616407  | 1.028179 | 0.000843  | -0.002177 | 0.010084  |
| O | -3.378295 | 8.185194  | 5.338611 | -0.003527 | 0.001363  | 0.014654  |
| H | -0.637445 | 12.195109 | 2.878812 | -0.007098 | -0.004803 | -0.010617 |
| H | 3.090587  | 1.606491  | 3.487978 | -0.008841 | -0.008608 | -0.008097 |
| H | 5.245016  | 5.294309  | 0.304583 | 0.006915  | -0.008467 | 0.008576  |
| H | -2.791874 | 8.507292  | 6.062207 | 0.005150  | -0.004702 | 0.011121  |

175 f = 2.849369 THz 17.903111 2PiTHz 95.044705 cm-1 11.784046 meV

|    | X         | Y         | Z        | dx        | dy        | dz        |
|----|-----------|-----------|----------|-----------|-----------|-----------|
| Li | 3.769818  | 9.645336  | 4.001386 | -0.010919 | -0.004747 | 0.001389  |
| Li | -1.316675 | 4.156264  | 2.365404 | -0.010123 | -0.004397 | 0.000880  |
| Li | -3.471104 | 2.744536  | 5.548798 | -0.010263 | 0.004414  | 0.001279  |
| Li | 5.924247  | 11.057064 | 0.817991 | -0.011067 | 0.005102  | 0.001747  |
| Na | 2.049025  | 6.784862  | 1.629696 | 0.089051  | 0.003893  | -0.023061 |
| Na | 0.404117  | 7.016739  | 4.737094 | 0.081955  | 0.002763  | -0.024437 |
| Na | 2.558546  | 13.685662 | 1.553699 | 0.079112  | -0.002910 | -0.022190 |
| Na | -0.105403 | 0.115939  | 4.813091 | 0.084592  | -0.003830 | -0.021148 |
| B  | 4.155007  | 8.978944  | 1.168663 | -0.010346 | 0.000989  | 0.006783  |
| B  | -1.701865 | 4.822656  | 5.198127 | -0.009796 | 0.000396  | 0.006802  |
| B  | 0.452564  | 2.078144  | 2.014732 | -0.010098 | -0.000505 | 0.006994  |
| B  | 2.000578  | 11.723457 | 4.352058 | -0.010658 | -0.000652 | 0.007022  |
| B  | -2.733891 | 11.746082 | 5.839177 | -0.003099 | 0.000611  | -0.002281 |
| B  | 5.187034  | 2.055518  | 0.527613 | -0.002354 | 0.000505  | -0.002334 |

|    |           |           |          |           |           |           |
|----|-----------|-----------|----------|-----------|-----------|-----------|
| B  | 3.032605  | 4.845282  | 3.711007 | -0.002107 | -0.000869 | -0.002443 |
| B  | -0.579463 | 8.956318  | 2.655782 | -0.002838 | -0.000556 | -0.002472 |
| B  | -0.983708 | 0.054306  | 1.827988 | -0.012330 | 0.001397  | 0.001656  |
| B  | 3.436850  | 13.747295 | 4.538802 | -0.012394 | 0.001204  | 0.001125  |
| B  | 5.591279  | 6.955106  | 1.355407 | -0.012052 | -0.001002 | 0.000734  |
| B  | -3.138137 | 6.846495  | 5.011383 | -0.011885 | -0.001484 | 0.001215  |
| Si | 0.631772  | 3.486686  | 4.508512 | -0.007188 | 0.015760  | 0.003659  |
| Si | 1.821370  | 10.314915 | 1.858278 | -0.008023 | 0.016115  | 0.003795  |
| Si | -0.333059 | 10.387486 | 5.041673 | -0.008118 | -0.015966 | 0.003694  |
| Si | 2.786201  | 3.414115  | 1.325117 | -0.007292 | -0.016028 | 0.003582  |
| O  | 0.061445  | 3.072947  | 3.041906 | 0.000440  | 0.011628  | 0.002012  |
| O  | 2.391697  | 10.728653 | 3.324884 | -0.000076 | 0.011560  | 0.002141  |
| O  | 4.546126  | 9.973747  | 0.141489 | 0.000067  | -0.011212 | 0.002003  |
| O  | -2.092984 | 3.827853  | 6.225301 | 0.000533  | -0.011635 | 0.001935  |
| O  | 2.197450  | 3.933608  | 4.519003 | -0.008079 | 0.018379  | 0.009925  |
| O  | 0.255692  | 9.867992  | 1.847787 | -0.008909 | 0.018907  | 0.010202  |
| O  | -1.898737 | 10.834409 | 5.031182 | -0.009058 | -0.018766 | 0.010290  |
| O  | 4.351879  | 2.967192  | 1.335608 | -0.008227 | -0.018646 | 0.009959  |
| O  | -0.212316 | 4.798696  | 5.055280 | -0.008835 | 0.014655  | 0.007137  |
| O  | 2.665458  | 9.002905  | 1.311510 | -0.009450 | 0.015373  | 0.006891  |
| O  | 0.511030  | 11.699496 | 4.494905 | -0.009764 | -0.014983 | 0.006914  |
| O  | 1.942113  | 2.102105  | 1.871885 | -0.009129 | -0.014722 | 0.007117  |
| O  | 0.525580  | 2.169271  | 5.472081 | -0.002689 | 0.014068  | 0.000568  |
| O  | 1.927562  | 11.632329 | 0.894709 | -0.003694 | 0.014349  | 0.000706  |
| O  | -0.226867 | 9.070071  | 4.078104 | -0.003596 | -0.014240 | 0.000615  |
| O  | 2.680009  | 4.731529  | 2.288686 | -0.002576 | -0.014388 | 0.000539  |
| O  | 0.058846  | 0.698526  | 2.444964 | -0.026492 | 0.007307  | 0.014829  |
| O  | 2.394296  | 13.103075 | 3.921826 | -0.027182 | 0.007307  | 0.014904  |
| O  | 4.548725  | 7.599326  | 0.738431 | -0.026942 | -0.007020 | 0.014557  |
| O  | -2.095583 | 6.202275  | 5.628359 | -0.026127 | -0.007342 | 0.014450  |
| O  | -2.459230 | 13.184059 | 5.445139 | 0.004872  | -0.007295 | -0.021812 |
| O  | 4.912372  | 0.617542  | 0.921651 | 0.005316  | -0.007195 | -0.021665 |
| O  | 2.757943  | 6.283259  | 4.105046 | 0.005770  | 0.006964  | -0.022043 |
| O  | -0.304801 | 7.518342  | 2.261744 | 0.005305  | 0.007434  | -0.022266 |
| O  | -0.175430 | 2.374756  | 0.744070 | -0.004638 | 0.002163  | 0.005118  |
| O  | 2.628573  | 11.426844 | 5.622720 | -0.005449 | 0.002310  | 0.005258  |

|   |           |           |          |           |           |          |
|---|-----------|-----------|----------|-----------|-----------|----------|
| O | 4.783002  | 9.275557  | 2.439325 | -0.005182 | -0.002190 | 0.005074 |
| O | -2.329859 | 4.526044  | 3.927465 | -0.004379 | -0.002476 | 0.004990 |
| O | -1.223866 | 12.517207 | 2.155216 | -0.030570 | 0.005052  | 0.004371 |
| O | 3.677009  | 1.284394  | 4.211574 | -0.030334 | 0.004658  | 0.003487 |
| O | 5.831438  | 5.616407  | 1.028179 | -0.030590 | -0.004563 | 0.003091 |
| O | -3.378295 | 8.185194  | 5.338611 | -0.030369 | -0.005108 | 0.003647 |
| H | -0.637445 | 12.195109 | 2.878812 | -0.045721 | -0.002474 | 0.012490 |
| H | 3.090587  | 1.606491  | 3.487978 | -0.045311 | -0.002854 | 0.011466 |
| H | 5.245016  | 5.294309  | 0.304583 | -0.045852 | 0.003247  | 0.011137 |
| H | -2.791874 | 8.507292  | 6.062207 | -0.045920 | 0.002680  | 0.011941 |

176 f = 2.092848 THz 13.149753 2PiTHz 69.809898 cm-1 8.655327  
meV

|    | X         | Y         | Z        | dx        | dy        | dz        |
|----|-----------|-----------|----------|-----------|-----------|-----------|
| Li | 3.769818  | 9.645336  | 4.001386 | -0.014867 | -0.004621 | -0.011349 |
| Li | -1.316675 | 4.156264  | 2.365404 | 0.014910  | 0.004579  | 0.011126  |
| Li | -3.471104 | 2.744536  | 5.548798 | 0.014938  | -0.004660 | 0.011117  |
| Li | 5.924247  | 11.057064 | 0.817991 | -0.014855 | 0.004584  | -0.011366 |
| Na | 2.049025  | 6.784862  | 1.629696 | -0.007759 | -0.010815 | 0.017287  |
| Na | 0.404117  | 7.016739  | 4.737094 | 0.007251  | 0.010927  | -0.016821 |
| Na | 2.558546  | 13.685662 | 1.553699 | 0.007294  | -0.010896 | -0.016871 |
| Na | -0.105403 | 0.115939  | 4.813091 | -0.007831 | 0.010855  | 0.017201  |
| B  | 4.155007  | 8.978944  | 1.168663 | -0.015827 | 0.006324  | -0.027873 |
| B  | -1.701865 | 4.822656  | 5.198127 | 0.015886  | -0.006372 | 0.027628  |
| B  | 0.452564  | 2.078144  | 2.014732 | 0.015872  | 0.006300  | 0.027610  |
| B  | 2.000578  | 11.723457 | 4.352058 | -0.015817 | -0.006312 | -0.027869 |
| B  | -2.733891 | 11.746082 | 5.839177 | -0.026061 | 0.003338  | -0.017094 |
| B  | 5.187034  | 2.055518  | 0.527613 | 0.026105  | -0.003368 | 0.016847  |
| B  | 3.032605  | 4.845282  | 3.711007 | 0.026114  | 0.003284  | 0.016859  |
| B  | -0.579463 | 8.956318  | 2.655782 | -0.026072 | -0.003355 | -0.017104 |
| B  | -0.983708 | 0.054306  | 1.827988 | 0.023044  | -0.000376 | 0.014627  |
| B  | 3.436850  | 13.747295 | 4.538802 | -0.022977 | 0.000346  | -0.014837 |
| B  | 5.591279  | 6.955106  | 1.355407 | -0.023066 | -0.000388 | -0.014804 |
| B  | -3.138137 | 6.846495  | 5.011383 | 0.023046  | 0.000294  | 0.014655  |
| Si | 0.631772  | 3.486686  | 4.508512 | 0.023656  | 0.011528  | 0.023271  |

|    |           |           |          |           |           |           |
|----|-----------|-----------|----------|-----------|-----------|-----------|
| Si | 1.821370  | 10.314915 | 1.858278 | -0.023590 | -0.011594 | -0.023528 |
| Si | -0.333059 | 10.387486 | 5.041673 | -0.023587 | 0.011602  | -0.023541 |
| Si | 2.786201  | 3.414115  | 1.325117 | 0.023658  | -0.011597 | 0.023281  |
| O  | 0.061445  | 3.072947  | 3.041906 | 0.025421  | 0.019219  | 0.019994  |
| O  | 2.391697  | 10.728653 | 3.324884 | -0.025375 | -0.019230 | -0.020264 |
| O  | 4.546126  | 9.973747  | 0.141489 | -0.025366 | 0.019219  | -0.020285 |
| O  | -2.092984 | 3.827853  | 6.225301 | 0.025435  | -0.019288 | 0.020004  |
| O  | 2.197450  | 3.933608  | 4.519003 | 0.021106  | 0.016967  | 0.025357  |
| O  | 0.255692  | 9.867992  | 1.847787 | -0.021014 | -0.017122 | -0.025646 |
| O  | -1.898737 | 10.834409 | 5.031182 | -0.021024 | 0.017085  | -0.025634 |
| O  | 4.351879  | 2.967192  | 1.335608 | 0.021101  | -0.017073 | 0.025377  |
| O  | -0.212316 | 4.798696  | 5.055280 | 0.019282  | 0.006581  | 0.032301  |
| O  | 2.665458  | 9.002905  | 1.311510 | -0.019204 | -0.006636 | -0.032539 |
| O  | 0.511030  | 11.699496 | 4.494905 | -0.019204 | 0.006657  | -0.032539 |
| O  | 1.942113  | 2.102105  | 1.871885 | 0.019264  | -0.006640 | 0.032284  |
| O  | 0.525580  | 2.169271  | 5.472081 | 0.027746  | 0.006280  | 0.016719  |
| O  | 1.927562  | 11.632329 | 0.894709 | -0.027729 | -0.006335 | -0.016967 |
| O  | -0.226867 | 9.070071  | 4.078104 | -0.027731 | 0.006338  | -0.016980 |
| O  | 2.680009  | 4.731529  | 2.288686 | 0.027772  | -0.006342 | 0.016722  |
| O  | 0.058846  | 0.698526  | 2.444964 | 0.002375  | 0.014767  | 0.035137  |
| O  | 2.394296  | 13.103075 | 3.921826 | -0.002299 | -0.014784 | -0.035355 |
| O  | 4.548725  | 7.599326  | 0.738431 | -0.002348 | 0.014788  | -0.035343 |
| O  | -2.095583 | 6.202275  | 5.628359 | 0.002393  | -0.014835 | 0.035152  |
| O  | -2.459230 | 13.184059 | 5.445139 | -0.030899 | 0.008663  | -0.001331 |
| O  | 4.912372  | 0.617542  | 0.921651 | 0.030917  | -0.008686 | 0.001164  |
| O  | 2.757943  | 6.283259  | 4.105046 | 0.030924  | 0.008597  | 0.001194  |
| O  | -0.304801 | 7.518342  | 2.261744 | -0.030950 | -0.008710 | -0.001322 |
| O  | -0.175430 | 2.374756  | 0.744070 | 0.024206  | 0.002351  | 0.022850  |
| O  | 2.628573  | 11.426844 | 5.622720 | -0.024131 | -0.002395 | -0.023146 |
| O  | 4.783002  | 9.275557  | 2.439325 | -0.024137 | 0.002405  | -0.023151 |
| O  | -2.329859 | 4.526044  | 3.927465 | 0.024213  | -0.002441 | 0.022878  |
| O  | -1.223866 | 12.517207 | 2.155216 | 0.039777  | -0.003453 | 0.006188  |
| O  | 3.677009  | 1.284394  | 4.211574 | -0.039590 | 0.003393  | -0.006425 |
| O  | 5.831438  | 5.616407  | 1.028179 | -0.039816 | -0.003460 | -0.006369 |
| O  | -3.378295 | 8.185194  | 5.338611 | 0.039759  | 0.003370  | 0.006213  |
| H  | -0.637445 | 12.195109 | 2.878812 | 0.042941  | 0.001917  | 0.008461  |

|   |           |          |          |           |           |           |
|---|-----------|----------|----------|-----------|-----------|-----------|
| H | 3.090587  | 1.606491 | 3.487978 | -0.042709 | -0.001893 | -0.008692 |
| H | 5.245016  | 5.294309 | 0.304583 | -0.042963 | 0.001876  | -0.008641 |
| H | -2.791874 | 8.507292 | 6.062207 | 0.042910  | -0.001978 | 0.008488  |

177 f = 1.446213 THz 9.086822 2PiTHz 48.240459 cm-1 5.981057 meV

|    | X         | Y         | Z        | dx        | dy        | dz        |
|----|-----------|-----------|----------|-----------|-----------|-----------|
| Li | 3.769818  | 9.645336  | 4.001386 | -0.029481 | -0.004617 | 0.023976  |
| Li | -1.316675 | 4.156264  | 2.365404 | 0.029609  | 0.004611  | -0.023850 |
| Li | -3.471104 | 2.744536  | 5.548798 | 0.029604  | -0.004614 | -0.023867 |
| Li | 5.924247  | 11.057064 | 0.817991 | -0.029481 | 0.004585  | 0.023977  |
| Na | 2.049025  | 6.784862  | 1.629696 | -0.015429 | -0.011959 | -0.009973 |
| Na | 0.404117  | 7.016739  | 4.737094 | 0.015025  | 0.011972  | 0.010151  |
| Na | 2.558546  | 13.685662 | 1.553699 | 0.014986  | -0.011915 | 0.010104  |
| Na | -0.105403 | 0.115939  | 4.813091 | -0.015413 | 0.012016  | -0.010006 |
| B  | 4.155007  | 8.978944  | 1.168663 | -0.027479 | -0.000329 | 0.025206  |
| B  | -1.701865 | 4.822656  | 5.198127 | 0.027601  | 0.000292  | -0.025113 |
| B  | 0.452564  | 2.078144  | 2.014732 | 0.027607  | -0.000295 | -0.025110 |
| B  | 2.000578  | 11.723457 | 4.352058 | -0.027485 | 0.000287  | 0.025204  |
| B  | -2.733891 | 11.746082 | 5.839177 | -0.026530 | -0.002550 | 0.024187  |
| B  | 5.187034  | 2.055518  | 0.527613 | 0.026628  | 0.002532  | -0.024057 |
| B  | 3.032605  | 4.845282  | 3.711007 | 0.026619  | -0.002521 | -0.024074 |
| B  | -0.579463 | 8.956318  | 2.655782 | -0.026535 | 0.002514  | 0.024191  |
| B  | -0.983708 | 0.054306  | 1.827988 | 0.011074  | 0.008928  | -0.009192 |
| B  | 3.436850  | 13.747295 | 4.538802 | -0.010961 | -0.008961 | 0.009284  |
| B  | 5.591279  | 6.955106  | 1.355407 | -0.010950 | 0.008915  | 0.009299  |
| B  | -3.138137 | 6.846495  | 5.011383 | 0.011072  | -0.008942 | -0.009188 |
| Si | 0.631772  | 3.486686  | 4.508512 | 0.028249  | 0.001413  | -0.024605 |
| Si | 1.821370  | 10.314915 | 1.858278 | -0.028137 | -0.001477 | 0.024719  |
| Si | -0.333059 | 10.387486 | 5.041673 | -0.028135 | 0.001446  | 0.024720  |
| Si | 2.786201  | 3.414115  | 1.325117 | 0.028258  | -0.001403 | -0.024610 |
| O  | 0.061445  | 3.072947  | 3.041906 | 0.029818  | 0.002866  | -0.026145 |
| O  | 2.391697  | 10.728653 | 3.324884 | -0.029734 | -0.002939 | 0.026274  |
| O  | 4.546126  | 9.973747  | 0.141489 | -0.029715 | 0.002878  | 0.026262  |
| O  | -2.092984 | 3.827853  | 6.225301 | 0.029843  | -0.002900 | -0.026169 |

|   |           |           |          |           |           |           |
|---|-----------|-----------|----------|-----------|-----------|-----------|
| O | 2.197450  | 3.933608  | 4.519003 | 0.030228  | -0.006093 | -0.024226 |
| O | 0.255692  | 9.867992  | 1.847787 | -0.030112 | 0.006011  | 0.024309  |
| O | -1.898737 | 10.834409 | 5.031182 | -0.030113 | -0.006057 | 0.024315  |
| O | 4.351879  | 2.967192  | 1.335608 | 0.030236  | 0.006094  | -0.024202 |
| O | -0.212316 | 4.798696  | 5.055280 | 0.028298  | 0.002942  | -0.025690 |
| O | 2.665458  | 9.002905  | 1.311510 | -0.028177 | -0.002991 | 0.025765  |
| O | 0.511030  | 11.699496 | 4.494905 | -0.028183 | 0.002965  | 0.025775  |
| O | 1.942113  | 2.102105  | 1.871885 | 0.028301  | -0.002920 | -0.025670 |
| O | 0.525580  | 2.169271  | 5.472081 | 0.024793  | 0.002060  | -0.023780 |
| O | 1.927562  | 11.632329 | 0.894709 | -0.024708 | -0.002112 | 0.023910  |
| O | -0.226867 | 9.070071  | 4.078104 | -0.024714 | 0.002086  | 0.023907  |
| O | 2.680009  | 4.731529  | 2.288686 | 0.024788  | -0.002041 | -0.023801 |
| O | 0.058846  | 0.698526  | 2.444964 | 0.021832  | 0.002054  | -0.020538 |
| O | 2.394296  | 13.103075 | 3.921826 | -0.021648 | -0.002111 | 0.020572  |
| O | 4.548725  | 7.599326  | 0.738431 | -0.021646 | 0.002059  | 0.020590  |
| O | -2.095583 | 6.202275  | 5.628359 | 0.021807  | -0.002077 | -0.020513 |
| O | -2.459230 | 13.184059 | 5.445139 | -0.019973 | -0.005832 | 0.019246  |
| O | 4.912372  | 0.617542  | 0.921651 | 0.020038  | 0.005837  | -0.019071 |
| O | 2.757943  | 6.283259  | 4.105046 | 0.020039  | -0.005829 | -0.019085 |
| O | -0.304801 | 7.518342  | 2.261744 | -0.019979 | 0.005790  | 0.019275  |
| O | -0.175430 | 2.374756  | 0.744070 | 0.027870  | -0.000973 | -0.025361 |
| O | 2.628573  | 11.426844 | 5.622720 | -0.027755 | 0.000957  | 0.025459  |
| O | 4.783002  | 9.275557  | 2.439325 | -0.027759 | -0.000987 | 0.025460  |
| O | -2.329859 | 4.526044  | 3.927465 | 0.027855  | 0.000984  | -0.025365 |
| O | -1.223866 | 12.517207 | 2.155216 | -0.016577 | 0.018787  | 0.015765  |
| O | 3.677009  | 1.284394  | 4.211574 | 0.016746  | -0.018825 | -0.015653 |
| O | 5.831438  | 5.616407  | 1.028179 | 0.016793  | 0.018792  | -0.015661 |
| O | -3.378295 | 8.185194  | 5.338611 | -0.016565 | -0.018797 | 0.015764  |
| H | -0.637445 | 12.195109 | 2.878812 | -0.019958 | 0.013493  | 0.016008  |
| H | 3.090587  | 1.606491  | 3.487978 | 0.020197  | -0.013504 | -0.015938 |
| H | 5.245016  | 5.294309  | 0.304583 | 0.020243  | 0.013468  | -0.015944 |
| H | -2.791874 | 8.507292  | 6.062207 | -0.019938 | -0.013505 | 0.016003  |

178 f/i=      0.017959 THz      0.112841 2PiTHz      0.599052 cm-1      0.074273 meV  
                 X                    Y                    Z                    dx                    dy                    dz



|    |           |           |          |           |          |           |
|----|-----------|-----------|----------|-----------|----------|-----------|
| Li | 3.769818  | 9.645336  | 4.001386 | -0.000351 | 0.000561 | -0.033675 |
| Li | -1.316675 | 4.156264  | 2.365404 | -0.000351 | 0.000496 | -0.033813 |
| Li | -3.471104 | 2.744536  | 5.548798 | -0.000358 | 0.000572 | -0.033812 |
| Li | 5.924247  | 11.057064 | 0.817991 | -0.000356 | 0.000502 | -0.033679 |
| Na | 2.049025  | 6.784862  | 1.629696 | -0.000267 | 0.000498 | -0.033637 |
| Na | 0.404117  | 7.016739  | 4.737094 | -0.000264 | 0.000466 | -0.033682 |
| Na | 2.558546  | 13.685662 | 1.553699 | -0.000270 | 0.000605 | -0.033685 |
| Na | -0.105403 | 0.115939  | 4.813091 | -0.000269 | 0.000568 | -0.033632 |
| B  | 4.155007  | 8.978944  | 1.168663 | -0.000350 | 0.000443 | -0.033630 |
| B  | -1.701865 | 4.822656  | 5.198127 | -0.000350 | 0.000481 | -0.033891 |
| B  | 0.452564  | 2.078144  | 2.014732 | -0.000346 | 0.000583 | -0.033881 |
| B  | 2.000578  | 11.723457 | 4.352058 | -0.000347 | 0.000616 | -0.033628 |
| B  | -2.733891 | 11.746082 | 5.839177 | -0.000306 | 0.000602 | -0.033650 |
| B  | 5.187034  | 2.055518  | 0.527613 | -0.000351 | 0.000607 | -0.033857 |
| B  | 3.032605  | 4.845282  | 3.711007 | -0.000356 | 0.000464 | -0.033865 |
| B  | -0.579463 | 8.956318  | 2.655782 | -0.000302 | 0.000468 | -0.033656 |
| B  | -0.983708 | 0.054306  | 1.827988 | -0.000374 | 0.000626 | -0.033853 |
| B  | 3.436850  | 13.747295 | 4.538802 | -0.000322 | 0.000625 | -0.033647 |
| B  | 5.591279  | 6.955106  | 1.355407 | -0.000311 | 0.000439 | -0.033656 |
| B  | -3.138137 | 6.846495  | 5.011383 | -0.000380 | 0.000437 | -0.033852 |
| Si | 0.631772  | 3.486686  | 4.508512 | -0.000362 | 0.000525 | -0.033859 |
| Si | 1.821370  | 10.314915 | 1.858278 | -0.000330 | 0.000555 | -0.033638 |
| Si | -0.333059 | 10.387486 | 5.041673 | -0.000334 | 0.000512 | -0.033640 |
| Si | 2.786201  | 3.414115  | 1.325117 | -0.000362 | 0.000544 | -0.033863 |
| O  | 0.061445  | 3.072947  | 3.041906 | -0.000369 | 0.000539 | -0.033849 |
| O  | 2.391697  | 10.728653 | 3.324884 | -0.000362 | 0.000614 | -0.033635 |
| O  | 4.546126  | 9.973747  | 0.141489 | -0.000365 | 0.000443 | -0.033639 |
| O  | -2.092984 | 3.827853  | 6.225301 | -0.000363 | 0.000519 | -0.033860 |
| O  | 2.197450  | 3.933608  | 4.519003 | -0.000357 | 0.000491 | -0.033832 |
| O  | 0.255692  | 9.867992  | 1.847787 | -0.000331 | 0.000521 | -0.033630 |
| O  | -1.898737 | 10.834409 | 5.031182 | -0.000330 | 0.000561 | -0.033633 |
| O  | 4.351879  | 2.967192  | 1.335608 | -0.000357 | 0.000583 | -0.033831 |
| O  | -0.212316 | 4.798696  | 5.055280 | -0.000360 | 0.000519 | -0.033876 |
| O  | 2.665458  | 9.002905  | 1.311510 | -0.000336 | 0.000518 | -0.033570 |
| O  | 0.511030  | 11.699496 | 4.494905 | -0.000334 | 0.000547 | -0.033570 |
| O  | 1.942113  | 2.102105  | 1.871885 | -0.000356 | 0.000551 | -0.033866 |

|   |           |           |          |           |          |           |
|---|-----------|-----------|----------|-----------|----------|-----------|
| O | 0.525580  | 2.169271  | 5.472081 | -0.000375 | 0.000552 | -0.033846 |
| O | 1.927562  | 11.632329 | 0.894709 | -0.000300 | 0.000557 | -0.033658 |
| O | -0.226867 | 9.070071  | 4.078104 | -0.000305 | 0.000510 | -0.033661 |
| O | 2.680009  | 4.731529  | 2.288686 | -0.000387 | 0.000518 | -0.033853 |
| O | 0.058846  | 0.698526  | 2.444964 | -0.000328 | 0.000585 | -0.033911 |
| O | 2.394296  | 13.103075 | 3.921826 | -0.000357 | 0.000642 | -0.033616 |
| O | 4.548725  | 7.599326  | 0.738431 | -0.000362 | 0.000411 | -0.033612 |
| O | -2.095583 | 6.202275  | 5.628359 | -0.000335 | 0.000474 | -0.033913 |
| O | -2.459230 | 13.184059 | 5.445139 | -0.000292 | 0.000622 | -0.033664 |
| O | 4.912372  | 0.617542  | 0.921651 | -0.000345 | 0.000619 | -0.033879 |
| O | 2.757943  | 6.283259  | 4.105046 | -0.000347 | 0.000453 | -0.033889 |
| O | -0.304801 | 7.518342  | 2.261744 | -0.000273 | 0.000453 | -0.033686 |
| O | -0.175430 | 2.374756  | 0.744070 | -0.000350 | 0.000644 | -0.033873 |
| O | 2.628573  | 11.426844 | 5.622720 | -0.000307 | 0.000650 | -0.033649 |
| O | 4.783002  | 9.275557  | 2.439325 | -0.000307 | 0.000408 | -0.033651 |
| O | -2.329859 | 4.526044  | 3.927465 | -0.000356 | 0.000426 | -0.033884 |
| O | -1.223866 | 12.517207 | 2.155216 | -0.000478 | 0.000662 | -0.033785 |
| O | 3.677009  | 1.284394  | 4.211574 | -0.000304 | 0.000624 | -0.033694 |
| O | 5.831438  | 5.616407  | 1.028179 | -0.000285 | 0.000441 | -0.033704 |
| O | -3.378295 | 8.185194  | 5.338611 | -0.000487 | 0.000397 | -0.033774 |
| H | -0.637445 | 12.195109 | 2.878812 | -0.000535 | 0.000660 | -0.033745 |
| H | 3.090587  | 1.606491  | 3.487978 | -0.000309 | 0.000612 | -0.033688 |
| H | 5.245016  | 5.294309  | 0.304583 | -0.000300 | 0.000449 | -0.033688 |
| H | -2.791874 | 8.507292  | 6.062207 | -0.000547 | 0.000398 | -0.033732 |

|          |              |                 |               |              |           |           |
|----------|--------------|-----------------|---------------|--------------|-----------|-----------|
| 179 f/i= | 0.032483 THz | 0.204100 2PiTHz | 1.083531 cm-1 | 0.134341 meV |           |           |
|          | X            | Y               | Z             | dx           | dy        | dz        |
| Li       | 3.769818     | 9.645336        | 4.001386      | 0.000063     | -0.033808 | -0.000678 |
| Li       | -1.316675    | 4.156264        | 2.365404      | 0.000026     | -0.033809 | -0.000699 |
| Li       | -3.471104    | 2.744536        | 5.548798      | 0.000226     | -0.033804 | -0.000391 |
| Li       | 5.924247     | 11.057064       | 0.817991      | 0.000249     | -0.033815 | -0.000372 |
| Na       | 2.049025     | 6.784862        | 1.629696      | 0.000243     | -0.033637 | -0.000709 |
| Na       | 0.404117     | 7.016739        | 4.737094      | 0.000199     | -0.033763 | -0.000725 |
| Na       | 2.558546     | 13.685662       | 1.553699      | 0.000051     | -0.033631 | -0.000369 |
| Na       | -0.105403    | 0.115939        | 4.813091      | 0.000088     | -0.033764 | -0.000347 |

|    |           |           |          |           |           |           |
|----|-----------|-----------|----------|-----------|-----------|-----------|
| B  | 4.155007  | 8.978944  | 1.168663 | 0.000230  | -0.033617 | -0.000539 |
| B  | -1.701865 | 4.822656  | 5.198127 | 0.000208  | -0.033617 | -0.000565 |
| B  | 0.452564  | 2.078144  | 2.014732 | 0.000051  | -0.033605 | -0.000529 |
| B  | 2.000578  | 11.723457 | 4.352058 | 0.000079  | -0.033620 | -0.000497 |
| B  | -2.733891 | 11.746082 | 5.839177 | 0.000100  | -0.033874 | -0.000504 |
| B  | 5.187034  | 2.055518  | 0.527613 | 0.000071  | -0.033880 | -0.000536 |
| B  | 3.032605  | 4.845282  | 3.711007 | 0.000189  | -0.033873 | -0.000562 |
| B  | -0.579463 | 8.956318  | 2.655782 | 0.000218  | -0.033878 | -0.000541 |
| B  | -0.983708 | 0.054306  | 1.827988 | 0.000320  | -0.033780 | -0.000494 |
| B  | 3.436850  | 13.747295 | 4.538802 | 0.000324  | -0.033784 | -0.000483 |
| B  | 5.591279  | 6.955106  | 1.355407 | -0.000028 | -0.033785 | -0.000578 |
| B  | -3.138137 | 6.846495  | 5.011383 | -0.000038 | -0.033782 | -0.000586 |
| Si | 0.631772  | 3.486686  | 4.508512 | 0.000134  | -0.033745 | -0.000541 |
| Si | 1.821370  | 10.314915 | 1.858278 | 0.000166  | -0.033712 | -0.000509 |
| Si | -0.333059 | 10.387486 | 5.041673 | 0.000150  | -0.033751 | -0.000529 |
| Si | 2.786201  | 3.414115  | 1.325117 | 0.000123  | -0.033712 | -0.000556 |
| O  | 0.061445  | 3.072947  | 3.041906 | 0.000055  | -0.033556 | -0.000559 |
| O  | 2.391697  | 10.728653 | 3.324884 | 0.000104  | -0.033556 | -0.000525 |
| O  | 4.546126  | 9.973747  | 0.141489 | 0.000226  | -0.033579 | -0.000517 |
| O  | -2.092984 | 3.827853  | 6.225301 | 0.000179  | -0.033547 | -0.000534 |
| O  | 2.197450  | 3.933608  | 4.519003 | 0.000257  | -0.034127 | -0.000742 |
| O  | 0.255692  | 9.867992  | 1.847787 | 0.000291  | -0.034104 | -0.000692 |
| O  | -1.898737 | 10.834409 | 5.031182 | 0.000029  | -0.034129 | -0.000327 |
| O  | 4.351879  | 2.967192  | 1.335608 | -0.000003 | -0.034112 | -0.000379 |
| O  | -0.212316 | 4.798696  | 5.055280 | 0.000266  | -0.033639 | -0.000457 |
| O  | 2.665458  | 9.002905  | 1.311510 | 0.000292  | -0.033599 | -0.000440 |
| O  | 0.511030  | 11.699496 | 4.494905 | 0.000023  | -0.033639 | -0.000594 |
| O  | 1.942113  | 2.102105  | 1.871885 | -0.000008 | -0.033594 | -0.000623 |
| O  | 0.525580  | 2.169271  | 5.472081 | -0.000025 | -0.033695 | -0.000500 |
| O  | 1.927562  | 11.632329 | 0.894709 | 0.000005  | -0.033655 | -0.000463 |
| O  | -0.226867 | 9.070071  | 4.078104 | 0.000311  | -0.033694 | -0.000578 |
| O  | 2.680009  | 4.731529  | 2.288686 | 0.000297  | -0.033653 | -0.000605 |
| O  | 0.058846  | 0.698526  | 2.444964 | 0.000149  | -0.033552 | -0.000445 |
| O  | 2.394296  | 13.103075 | 3.921826 | 0.000142  | -0.033556 | -0.000416 |
| O  | 4.548725  | 7.599326  | 0.738431 | 0.000128  | -0.033569 | -0.000613 |
| O  | -2.095583 | 6.202275  | 5.628359 | 0.000147  | -0.033551 | -0.000657 |

|   |           |           |          |           |           |           |
|---|-----------|-----------|----------|-----------|-----------|-----------|
| O | -2.459230 | 13.184059 | 5.445139 | 0.000324  | -0.033999 | -0.000644 |
| O | 4.912372  | 0.617542  | 0.921651 | 0.000304  | -0.033998 | -0.000644 |
| O | 2.757943  | 6.283259  | 4.105046 | -0.000036 | -0.033998 | -0.000427 |
| O | -0.304801 | 7.518342  | 2.261744 | -0.000007 | -0.033992 | -0.000442 |
| O | -0.175430 | 2.374756  | 0.744070 | 0.000011  | -0.033672 | -0.000533 |
| O | 2.628573  | 11.426844 | 5.622720 | 0.000042  | -0.033670 | -0.000499 |
| O | 4.783002  | 9.275557  | 2.439325 | 0.000277  | -0.033672 | -0.000540 |
| O | -2.329859 | 4.526044  | 3.927465 | 0.000247  | -0.033673 | -0.000562 |
| O | -1.223866 | 12.517207 | 2.155216 | 0.000589  | -0.033762 | -0.000341 |
| O | 3.677009  | 1.284394  | 4.211574 | 0.000585  | -0.033764 | -0.000333 |
| O | 5.831438  | 5.616407  | 1.028179 | -0.000287 | -0.033765 | -0.000731 |
| O | -3.378295 | 8.185194  | 5.338611 | -0.000298 | -0.033764 | -0.000730 |
| H | -0.637445 | 12.195109 | 2.878812 | 0.000679  | -0.033631 | -0.000335 |
| H | 3.090587  | 1.606491  | 3.487978 | 0.000669  | -0.033625 | -0.000314 |
| H | 5.245016  | 5.294309  | 0.304583 | -0.000379 | -0.033633 | -0.000738 |
| H | -2.791874 | 8.507292  | 6.062207 | -0.000384 | -0.033626 | -0.000747 |

| 180 f/i= | 0.073215 THz | 0.460024 2PiTHz | 2.442191 cm-1 | 0.302793 meV |           |          |
|----------|--------------|-----------------|---------------|--------------|-----------|----------|
|          | X            | Y               | Z             | dx           | dy        | dz       |
| Li       | 3.769818     | 9.645336        | 4.001386      | -0.033734    | -0.000177 | 0.000288 |
| Li       | -1.316675    | 4.156264        | 2.365404      | -0.033717    | -0.000199 | 0.000257 |
| Li       | -3.471104    | 2.744536        | 5.548798      | -0.033713    | -0.000113 | 0.000269 |
| Li       | 5.924247     | 11.057064       | 0.817991      | -0.033742    | -0.000113 | 0.000294 |
| Na       | 2.049025     | 6.784862        | 1.629696      | -0.033110    | -0.000034 | 0.000356 |
| Na       | 0.404117     | 7.016739        | 4.737094      | -0.032733    | 0.000016  | 0.000398 |
| Na       | 2.558546     | 13.685662       | 1.553699      | -0.032717    | -0.000316 | 0.000409 |
| Na       | -0.105403    | 0.115939        | 4.813091      | -0.033115    | -0.000266 | 0.000362 |
| B        | 4.155007     | 8.978944        | 1.168663      | -0.033796    | 0.000025  | 0.000532 |
| B        | -1.701865    | 4.822656        | 5.198127      | -0.033759    | 0.000030  | 0.000485 |
| B        | 0.452564     | 2.078144        | 2.014732      | -0.033766    | -0.000334 | 0.000488 |
| B        | 2.000578     | 11.723457       | 4.352058      | -0.033789    | -0.000316 | 0.000540 |
| B        | -2.733891    | 11.746082       | 5.839177      | -0.033656    | -0.000114 | 0.000342 |
| B        | 5.187034     | 2.055518        | 0.527613      | -0.033636    | -0.000125 | 0.000286 |
| B        | 3.032605     | 4.845282        | 3.711007      | -0.033629    | -0.000187 | 0.000288 |
| B        | -0.579463    | 8.956318        | 2.655782      | -0.033661    | -0.000177 | 0.000335 |

|    |           |           |          |           |           |           |
|----|-----------|-----------|----------|-----------|-----------|-----------|
| B  | -0.983708 | 0.054306  | 1.827988 | -0.034020 | -0.000166 | 0.000127  |
| B  | 3.436850  | 13.747295 | 4.538802 | -0.034029 | -0.000173 | 0.000164  |
| B  | 5.591279  | 6.955106  | 1.355407 | -0.034053 | -0.000125 | 0.000162  |
| B  | -3.138137 | 6.846495  | 5.011383 | -0.034010 | -0.000136 | 0.000117  |
| Si | 0.631772  | 3.486686  | 4.508512 | -0.033695 | 0.000035  | 0.000414  |
| Si | 1.821370  | 10.314915 | 1.858278 | -0.033721 | 0.000039  | 0.000459  |
| Si | -0.333059 | 10.387486 | 5.041673 | -0.033722 | -0.000329 | 0.000454  |
| Si | 2.786201  | 3.414115  | 1.325117 | -0.033702 | -0.000342 | 0.000414  |
| O  | 0.061445  | 3.072947  | 3.041906 | -0.033692 | -0.000233 | 0.000473  |
| O  | 2.391697  | 10.728653 | 3.324884 | -0.033727 | -0.000232 | 0.000526  |
| O  | 4.546126  | 9.973747  | 0.141489 | -0.033732 | -0.000060 | 0.000521  |
| O  | -2.092984 | 3.827853  | 6.225301 | -0.033693 | -0.000066 | 0.000472  |
| O  | 2.197450  | 3.933608  | 4.519003 | -0.033710 | 0.000021  | 0.000362  |
| O  | 0.255692  | 9.867992  | 1.847787 | -0.033744 | 0.000037  | 0.000405  |
| O  | -1.898737 | 10.834409 | 5.031182 | -0.033744 | -0.000318 | 0.000399  |
| O  | 4.351879  | 2.967192  | 1.335608 | -0.033723 | -0.000341 | 0.000364  |
| O  | -0.212316 | 4.798696  | 5.055280 | -0.033697 | 0.000046  | 0.000624  |
| O  | 2.665458  | 9.002905  | 1.311510 | -0.033734 | 0.000033  | 0.000674  |
| O  | 0.511030  | 11.699496 | 4.494905 | -0.033728 | -0.000323 | 0.000681  |
| O  | 1.942113  | 2.102105  | 1.871885 | -0.033706 | -0.000355 | 0.000613  |
| O  | 0.525580  | 2.169271  | 5.472081 | -0.033526 | 0.000010  | 0.000330  |
| O  | 1.927562  | 11.632329 | 0.894709 | -0.033532 | 0.000023  | 0.000381  |
| O  | -0.226867 | 9.070071  | 4.078104 | -0.033543 | -0.000313 | 0.000376  |
| O  | 2.680009  | 4.731529  | 2.288686 | -0.033522 | -0.000316 | 0.000332  |
| O  | 0.058846  | 0.698526  | 2.444964 | -0.034013 | -0.000406 | 0.000362  |
| O  | 2.394296  | 13.103075 | 3.921826 | -0.034005 | -0.000413 | 0.000389  |
| O  | 4.548725  | 7.599326  | 0.738431 | -0.034021 | 0.000124  | 0.000384  |
| O  | -2.095583 | 6.202275  | 5.628359 | -0.033998 | 0.000110  | 0.000349  |
| O  | -2.459230 | 13.184059 | 5.445139 | -0.033752 | -0.000118 | 0.000008  |
| O  | 4.912372  | 0.617542  | 0.921651 | -0.033731 | -0.000130 | -0.000055 |
| O  | 2.757943  | 6.283259  | 4.105046 | -0.033733 | -0.000185 | -0.000044 |
| O  | -0.304801 | 7.518342  | 2.261744 | -0.033763 | -0.000179 | -0.000003 |
| O  | -0.175430 | 2.374756  | 0.744070 | -0.033618 | -0.000250 | 0.000477  |
| O  | 2.628573  | 11.426844 | 5.622720 | -0.033632 | -0.000240 | 0.000527  |
| O  | 4.783002  | 9.275557  | 2.439325 | -0.033635 | -0.000050 | 0.000517  |
| O  | -2.329859 | 4.526044  | 3.927465 | -0.033607 | -0.000052 | 0.000471  |

|   |           |           |          |           |           |           |
|---|-----------|-----------|----------|-----------|-----------|-----------|
| O | -1.223866 | 12.517207 | 2.155216 | -0.034863 | -0.000097 | -0.000197 |
| O | 3.677009  | 1.284394  | 4.211574 | -0.034809 | -0.000122 | -0.000208 |
| O | 5.831438  | 5.616407  | 1.028179 | -0.034867 | -0.000182 | -0.000207 |
| O | -3.378295 | 8.185194  | 5.338611 | -0.034842 | -0.000198 | -0.000220 |
| H | -0.637445 | 12.195109 | 2.878812 | -0.035461 | -0.000443 | 0.000110  |
| H | 3.090587  | 1.606491  | 3.487978 | -0.035416 | -0.000452 | 0.000113  |
| H | 5.245016  | 5.294309  | 0.304583 | -0.035483 | 0.000160  | 0.000114  |
| H | -2.791874 | 8.507292  | 6.062207 | -0.035438 | 0.000146  | 0.000086  |
